# Supplementary material for: Superenhancer Analysis Defines Novel Epigenomic Subtypes of Non-APL AML, Including an RARα Dependency Targetable by SY-1425, a Potent and Selective RARα Agonist
Source: Oxford University Press journal article supplement (doi:10.1158/2159-8290.cd-17-0399), 2017-07-20
Supplement: 21598290cd170399-sup-181878_2_supp_4135418_vsdnjw.xlsx [file 21598290cd170399-sup-181878_2_supp_4135418_vsdnjw.xlsx]

## Sheet: Supp Table S5
Supplementary Table S5: GSEA of transcriptional response to SY-1425 in RARA-high cell lines in perturbation gene sets
NAME	GS.br..follow.link.to.MSigDB	GS.DETAILS	SIZE	ES	NES	NOM.p.val	FDR.q.val	FWER.p.val	RANK.AT.MAX	LEADING.EDGE	X
HALLMARK_INTERFERON_ALPHA_RESPONSE	HALLMARK_INTERFERON_ALPHA_RESPONSE	Details ...	93	-0.641548	-2.33121	0	0	0	3410	tags=49%, list=16%, signal=58%	NA
HALLMARK_INTERFERON_GAMMA_RESPONSE	HALLMARK_INTERFERON_GAMMA_RESPONSE	Details ...	196	-0.574376	-2.28031	0	0	0	2047	tags=31%, list=9%, signal=34%	NA
PID_INTEGRIN_CS_PATHWAY	PID_INTEGRIN_CS_PATHWAY	Details ...	26	-0.783042	-2.24214	0	0.000723236	0.002	1773	tags=46%, list=8%, signal=50%	NA
HALLMARK_PROTEIN_SECRETION	HALLMARK_PROTEIN_SECRETION	Details ...	96	-0.613005	-2.20437	0	0.00215886	0.008	3876	tags=57%, list=18%, signal=69%	NA
HALLMARK_COMPLEMENT	HALLMARK_COMPLEMENT	Details ...	196	-0.548114	-2.19048	0	0.00236893	0.011	2092	tags=30%, list=10%, signal=32%	NA
PID_CXCR4_PATHWAY	PID_CXCR4_PATHWAY	Details ...	101	-0.572914	-2.09246	0	0.00981208	0.053	2123	tags=32%, list=10%, signal=35%	NA
REACTOME_ANTIGEN_PRESENTATION_FOLDING_ASSEMBLY_AND_PEPTIDE_LOADING_OF_CLASS_I_MHC	REACTOME_ANTIGEN_PRESENTATION_FOLDING_ASSEMBLY_AND_PEPTIDE_LOADING_OF_CLASS_I_MHC	Details ...	20	-0.755063	-2.04267	0	0.0167057	0.102	4263	tags=85%, list=20%, signal=106%	NA
REACTOME_INTEGRIN_CELL_SURFACE_INTERACTIONS	REACTOME_INTEGRIN_CELL_SURFACE_INTERACTIONS	Details ...	77	-0.576354	-2.02945	0	0.017553	0.12	2132	tags=26%, list=10%, signal=29%	NA
PID_TXA2PATHWAY	PID_TXA2PATHWAY	Details ...	57	-0.605528	-2.02823	0	0.0157197	0.121	1969	tags=26%, list=9%, signal=29%	NA
KEGG_LEUKOCYTE_TRANSENDOTHELIAL_MIGRATION	KEGG_LEUKOCYTE_TRANSENDOTHELIAL_MIGRATION	Details ...	114	-0.53306	-1.98141	0	0.0299386	0.235	2718	tags=30%, list=13%, signal=34%	NA
PID_IL8_CXCR1_PATHWAY	PID_IL8_CXCR1_PATHWAY	Details ...	28	-0.674558	-1.95397	0.00343053	0.0410869	0.336	966	tags=25%, list=4%, signal=26%	NA
PID_PI3KCI_PATHWAY	PID_PI3KCI_PATHWAY	Details ...	49	-0.595651	-1.94228	0	0.0423999	0.371	2382	tags=39%, list=11%, signal=43%	NA
HALLMARK_ALLOGRAFT_REJECTION	HALLMARK_ALLOGRAFT_REJECTION	Details ...	199	-0.483642	-1.93293	0	0.0448307	0.413	2105	tags=22%, list=10%, signal=24%	NA
HALLMARK_TGF_BETA_SIGNALING	HALLMARK_TGF_BETA_SIGNALING	Details ...	54	-0.582112	-1.91031	0.00323102	0.0541301	0.503	2531	tags=37%, list=12%, signal=42%	NA
HALLMARK_TNFA_SIGNALING_VIA_NFKB	HALLMARK_TNFA_SIGNALING_VIA_NFKB	Details ...	199	-0.469574	-1.89267	0	0.0660122	0.602	1953	tags=28%, list=9%, signal=30%	NA
PID_PDGFRB_PATHWAY	PID_PDGFRB_PATHWAY	Details ...	129	-0.489245	-1.85422	0	0.0978451	0.764	3739	tags=43%, list=17%, signal=52%	NA
PID_IL8_CXCR2_PATHWAY	PID_IL8_CXCR2_PATHWAY	Details ...	34	-0.60817	-1.85194	0.0033557	0.0939207	0.771	1755	tags=26%, list=8%, signal=29%	NA
KEGG_RETINOL_METABOLISM	KEGG_RETINOL_METABOLISM	Details ...	63	-0.543164	-1.83822	0.00148368	0.102894	0.827	73	tags=5%, list=0%, signal=5%	NA
KEGG_HEMATOPOIETIC_CELL_LINEAGE	KEGG_HEMATOPOIETIC_CELL_LINEAGE	Details ...	84	-0.51942	-1.82633	0.0014881	0.111163	0.87	640	tags=12%, list=3%, signal=12%	NA
PID_ARF6_TRAFFICKING_PATHWAY	PID_ARF6_TRAFFICKING_PATHWAY	Details ...	49	-0.561263	-1.8135	0.00490998	0.12065	0.899	2105	tags=33%, list=10%, signal=36%	NA
KEGG_LYSOSOME	KEGG_LYSOSOME		119	-0.483053	-1.803	0	0.1292	0.925	3211	tags=39%, list=15%, signal=45%	NA
BIOCARTA_PAR1_PATHWAY	BIOCARTA_PAR1_PATHWAY		37	-0.590931	-1.79644	0.00519031	0.131024	0.93	2994	tags=43%, list=14%, signal=50%	NA
KEGG_CHEMOKINE_SIGNALING_PATHWAY	KEGG_CHEMOKINE_SIGNALING_PATHWAY		189	-0.449803	-1.79484	0	0.126996	0.932	3170	tags=28%, list=15%, signal=32%	NA
REACTOME_CELL_SURFACE_INTERACTIONS_AT_THE_VASCULAR_WALL	REACTOME_CELL_SURFACE_INTERACTIONS_AT_THE_VASCULAR_WALL		84	-0.508769	-1.79008	0	0.129204	0.949	1804	tags=24%, list=8%, signal=26%	NA
REACTOME_PI_METABOLISM	REACTOME_PI_METABOLISM		47	-0.558587	-1.7881	0.00647249	0.12719	0.954	3285	tags=45%, list=15%, signal=53%	NA
REACTOME_INTERFERON_ALPHA_BETA_SIGNALING	REACTOME_INTERFERON_ALPHA_BETA_SIGNALING		62	-0.530278	-1.78573	0	0.12518	0.959	2630	tags=31%, list=12%, signal=35%	NA
ST_INTEGRIN_SIGNALING_PATHWAY	ST_INTEGRIN_SIGNALING_PATHWAY		82	-0.499399	-1.76394	0.00148588	0.149442	0.979	2994	tags=33%, list=14%, signal=38%	NA
PID_IFNG_PATHWAY	PID_IFNG_PATHWAY		40	-0.56387	-1.73984	0.00319489	0.179826	0.99	3144	tags=48%, list=15%, signal=55%	NA
KEGG_ECM_RECEPTOR_INTERACTION	KEGG_ECM_RECEPTOR_INTERACTION		83	-0.479714	-1.73607	0.00445765	0.179628	0.992	1773	tags=16%, list=8%, signal=17%	NA
REACTOME_IMMUNOREGULATORY_INTERACTIONS_BETWEEN_A_LYMPHOID_AND_A_NON_LYMPHOID_CELL	REACTOME_IMMUNOREGULATORY_INTERACTIONS_BETWEEN_A_LYMPHOID_AND_A_NON_LYMPHOID_CELL		61	-0.510784	-1.73433	0.00307692	0.176468	0.992	1940	tags=25%, list=9%, signal=27%	NA
SA_CASPASE_CASCADE	SA_CASPASE_CASCADE		19	-0.637267	-1.72776	0.0143369	0.180494	0.995	3041	tags=47%, list=14%, signal=55%	NA
BIOCARTA_MYOSIN_PATHWAY	BIOCARTA_MYOSIN_PATHWAY		31	-0.582955	-1.72115	0.0157618	0.185724	0.997	2994	tags=39%, list=14%, signal=45%	NA
REACTOME_PHASE1_FUNCTIONALIZATION_OF_COMPOUNDS	REACTOME_PHASE1_FUNCTIONALIZATION_OF_COMPOUNDS		69	-0.501094	-1.7206	0.00614439	0.180972	0.997	361	tags=7%, list=2%, signal=7%	NA
REACTOME_HEMOSTASIS	REACTOME_HEMOSTASIS		452	-0.401365	-1.72025	0	0.176317	0.997	2513	tags=21%, list=12%, signal=23%	NA
REACTOME_DOWNREGULATION_OF_SMAD2_3_SMAD4_TRANSCRIPTIONAL_ACTIVITY	REACTOME_DOWNREGULATION_OF_SMAD2_3_SMAD4_TRANSCRIPTIONAL_ACTIVITY		19	-0.654663	-1.72014	0.014652	0.171341	0.997	3570	tags=74%, list=16%, signal=88%	NA
REACTOME_SYNTHESIS_OF_PIPS_AT_THE_PLASMA_MEMBRANE	REACTOME_SYNTHESIS_OF_PIPS_AT_THE_PLASMA_MEMBRANE		30	-0.581614	-1.71364	0.0106195	0.176724	0.998	2042	tags=40%, list=9%, signal=44%	NA
PID_AMB2_NEUTROPHILS_PATHWAY	PID_AMB2_NEUTROPHILS_PATHWAY		41	-0.543315	-1.70537	0.00798722	0.184516	0.998	2123	tags=32%, list=10%, signal=35%	NA
REACTOME_TRANSCRIPTIONAL_ACTIVITY_OF_SMAD2_SMAD3_SMAD4_HETEROTRIMER	REACTOME_TRANSCRIPTIONAL_ACTIVITY_OF_SMAD2_SMAD3_SMAD4_HETEROTRIMER		36	-0.563786	-1.70233	0.00498339	0.184289	0.998	3570	tags=56%, list=16%, signal=66%	NA
PID_LYMPH_ANGIOGENESIS_PATHWAY	PID_LYMPH_ANGIOGENESIS_PATHWAY		25	-0.59259	-1.70066	0.00909091	0.182202	0.998	3786	tags=56%, list=17%, signal=68%	NA
BIOCARTA_CTCF_PATHWAY	BIOCARTA_CTCF_PATHWAY		23	-0.615264	-1.69756	0.0213904	0.18226	0.998	2746	tags=43%, list=13%, signal=50%	NA
PID_THROMBIN_PAR1_PATHWAY	PID_THROMBIN_PAR1_PATHWAY		43	-0.533695	-1.695	0.0174825	0.181401	0.998	1969	tags=30%, list=9%, signal=33%	NA
HALLMARK_ESTROGEN_RESPONSE_EARLY	HALLMARK_ESTROGEN_RESPONSE_EARLY		199	-0.425246	-1.69173	0	0.182483	0.998	1606	tags=15%, list=7%, signal=16%	NA
REACTOME_TRAF6_MEDIATED_IRF7_ACTIVATION	REACTOME_TRAF6_MEDIATED_IRF7_ACTIVATION		30	-0.582351	-1.68166	0.00362976	0.193576	0.999	1088	tags=20%, list=5%, signal=21%	NA
REACTOME_CELL_DEATH_SIGNALLING_VIA_NRAGE_NRIF_AND_NADE	REACTOME_CELL_DEATH_SIGNALLING_VIA_NRAGE_NRIF_AND_NADE		57	-0.500232	-1.67734	0.0127186	0.196507	1	3612	tags=37%, list=17%, signal=44%	NA
PID_CXCR3_PATHWAY	PID_CXCR3_PATHWAY		43	-0.534861	-1.67539	0.0127186	0.195336	1	2042	tags=28%, list=9%, signal=31%	NA
REACTOME_CHEMOKINE_RECEPTORS_BIND_CHEMOKINES	REACTOME_CHEMOKINE_RECEPTORS_BIND_CHEMOKINES		52	-0.515305	-1.675	0.00161812	0.19181	1	306	tags=15%, list=1%, signal=16%	NA
BIOCARTA_NKT_PATHWAY	BIOCARTA_NKT_PATHWAY		29	-0.563484	-1.66406	0.0190641	0.204911	1	1016	tags=17%, list=5%, signal=18%	NA
PID_FAS_PATHWAY	PID_FAS_PATHWAY		38	-0.536341	-1.65969	0.0241935	0.208349	1	3930	tags=47%, list=18%, signal=58%	NA
PID_INTEGRIN1_PATHWAY	PID_INTEGRIN1_PATHWAY		66	-0.492797	-1.65803	0.00490196	0.206712	1	357	tags=9%, list=2%, signal=9%	NA
REACTOME_TRANSPORT_TO_THE_GOLGI_AND_SUBSEQUENT_MODIFICATION	REACTOME_TRANSPORT_TO_THE_GOLGI_AND_SUBSEQUENT_MODIFICATION		33	-0.546854	-1.65483	0.0154905	0.208018	1	3286	tags=42%, list=15%, signal=50%	NA
REACTOME_INTERFERON_SIGNALING	REACTOME_INTERFERON_SIGNALING		152	-0.434209	-1.65324	0	0.206385	1	2314	tags=27%, list=11%, signal=30%	NA
KEGG_REGULATION_OF_ACTIN_CYTOSKELETON	KEGG_REGULATION_OF_ACTIN_CYTOSKELETON		212	-0.414754	-1.65101	0	0.206129	1	4162	tags=33%, list=19%, signal=40%	NA
REACTOME_INTERFERON_GAMMA_SIGNALING	REACTOME_INTERFERON_GAMMA_SIGNALING		58	-0.498817	-1.64874	0.00776398	0.205599	1	2314	tags=34%, list=11%, signal=39%	NA
PID_INTEGRIN_A9B1_PATHWAY	PID_INTEGRIN_A9B1_PATHWAY		25	-0.573491	-1.64404	0.0154905	0.209727	1	1464	tags=20%, list=7%, signal=21%	NA
KEGG_P53_SIGNALING_PATHWAY	KEGG_P53_SIGNALING_PATHWAY		68	-0.480778	-1.64155	0.00920245	0.209639	1	3041	tags=35%, list=14%, signal=41%	NA
REACTOME_PHOSPHOLIPID_METABOLISM	REACTOME_PHOSPHOLIPID_METABOLISM		196	-0.413825	-1.64068	0	0.207044	1	3285	tags=30%, list=15%, signal=35%	NA
BIOCARTA_HCMV_PATHWAY	BIOCARTA_HCMV_PATHWAY		17	-0.635937	-1.64063	0.0264084	0.203563	1	1889	tags=47%, list=9%, signal=52%	NA
REACTOME_RESPONSE_TO_ELEVATED_PLATELET_CYTOSOLIC_CA2_	REACTOME_RESPONSE_TO_ELEVATED_PLATELET_CYTOSOLIC_CA2_		81	-0.46438	-1.63695	0.00581395	0.205477	1	2653	tags=26%, list=12%, signal=29%	NA
HALLMARK_MITOTIC_SPINDLE	HALLMARK_MITOTIC_SPINDLE		199	-0.413957	-1.63174	0	0.210631	1	3875	tags=39%, list=18%, signal=47%	NA
PID_IL3_PATHWAY	PID_IL3_PATHWAY		27	-0.561577	-1.63135	0.043554	0.207626	1	3162	tags=56%, list=15%, signal=65%	NA
REACTOME_BOTULINUM_NEUROTOXICITY	REACTOME_BOTULINUM_NEUROTOXICITY		18	-0.612533	-1.62531	0.0322581	0.213857	1	1825	tags=22%, list=8%, signal=24%	NA
PID_EPHB_FWD_PATHWAY	PID_EPHB_FWD_PATHWAY		40	-0.518746	-1.62147	0.0208333	0.216131	1	3170	tags=38%, list=15%, signal=44%	NA
PID_THROMBIN_PAR4_PATHWAY	PID_THROMBIN_PAR4_PATHWAY		15	-0.64125	-1.61655	0.0509091	0.220892	1	2584	tags=47%, list=12%, signal=53%	NA
HALLMARK_IL2_STAT5_SIGNALING	HALLMARK_IL2_STAT5_SIGNALING		199	-0.410436	-1.61367	0.00130548	0.222281	1	2377	tags=26%, list=11%, signal=29%	NA
KEGG_PHOSPHATIDYLINOSITOL_SIGNALING_SYSTEM	KEGG_PHOSPHATIDYLINOSITOL_SIGNALING_SYSTEM		76	-0.458854	-1.60631	0.0122888	0.230065	1	1513	tags=24%, list=7%, signal=25%	NA
PID_INSULIN_PATHWAY	PID_INSULIN_PATHWAY		45	-0.506989	-1.60245	0.0153061	0.233204	1	2952	tags=40%, list=14%, signal=46%	NA
KEGG_FOCAL_ADHESION	KEGG_FOCAL_ADHESION		198	-0.400623	-1.60027	0.00131062	0.2331	1	2642	tags=24%, list=12%, signal=27%	NA
REACTOME_METABOLISM_OF_LIPIDS_AND_LIPOPROTEINS	REACTOME_METABOLISM_OF_LIPIDS_AND_LIPOPROTEINS		468	-0.372933	-1.59948	0	0.230965	1	3430	tags=27%, list=16%, signal=32%	NA
REACTOME_NRAGE_SIGNALS_DEATH_THROUGH_JNK	REACTOME_NRAGE_SIGNALS_DEATH_THROUGH_JNK		42	-0.49829	-1.59604	0.0267112	0.233691	1	3875	tags=38%, list=18%, signal=46%	NA
BIOCARTA_EIF4_PATHWAY	BIOCARTA_EIF4_PATHWAY		24	-0.570017	-1.59601	0.0318021	0.230399	1	2296	tags=42%, list=11%, signal=47%	NA
PID_ER_NONGENOMIC_PATHWAY	PID_ER_NONGENOMIC_PATHWAY		41	-0.516399	-1.5946	0.0190476	0.229532	1	2872	tags=34%, list=13%, signal=39%	NA
REACTOME_SPHINGOLIPID_METABOLISM	REACTOME_SPHINGOLIPID_METABOLISM		68	-0.463323	-1.59033	0.0153374	0.232984	1	3398	tags=32%, list=16%, signal=38%	NA
REACTOME_PLATELET_ACTIVATION_SIGNALING_AND_AGGREGATION	REACTOME_PLATELET_ACTIVATION_SIGNALING_AND_AGGREGATION		198	-0.399404	-1.59005	0	0.230244	1	2653	tags=24%, list=12%, signal=27%	NA
BIOCARTA_BCELLSURVIVAL_PATHWAY	BIOCARTA_BCELLSURVIVAL_PATHWAY		16	-0.626179	-1.59004	0.036036	0.227162	1	2409	tags=50%, list=11%, signal=56%	NA
PID_TGFBR_PATHWAY	PID_TGFBR_PATHWAY		55	-0.483477	-1.58777	0.0213115	0.228231	1	2896	tags=36%, list=13%, signal=42%	NA
BIOCARTA_MITOCHONDRIA_PATHWAY	BIOCARTA_MITOCHONDRIA_PATHWAY		21	-0.580455	-1.58508	0.05	0.229043	1	1044	tags=33%, list=5%, signal=35%	NA
PID_TCPTP_PATHWAY	PID_TCPTP_PATHWAY		43	-0.509548	-1.58264	0.0226537	0.230277	1	3713	tags=44%, list=17%, signal=53%	NA
BIOCARTA_MET_PATHWAY	BIOCARTA_MET_PATHWAY		37	-0.506735	-1.5801	0.0280066	0.231387	1	3593	tags=46%, list=17%, signal=55%	NA
REACTOME_TRANS_GOLGI_NETWORK_VESICLE_BUDDING	REACTOME_TRANS_GOLGI_NETWORK_VESICLE_BUDDING		57	-0.473221	-1.57968	0.0139752	0.229109	1	4938	tags=47%, list=23%, signal=61%	NA
SIG_CHEMOTAXIS	SIG_CHEMOTAXIS		45	-0.4972	-1.57938	0.0299003	0.226661	1	3612	tags=40%, list=17%, signal=48%	NA
PID_IL4_2PATHWAY	PID_IL4_2PATHWAY		64	-0.458665	-1.57623	0.0165016	0.229356	1	4651	tags=39%, list=21%, signal=50%	NA
KEGG_CELL_ADHESION_MOLECULES_CAMS	KEGG_CELL_ADHESION_MOLECULES_CAMS		129	-0.422684	-1.57444	0.0027894	0.229214	1	2288	tags=17%, list=11%, signal=19%	NA
HALLMARK_XENOBIOTIC_METABOLISM	HALLMARK_XENOBIOTIC_METABOLISM		199	-0.395357	-1.57191	0	0.230485	1	1717	tags=16%, list=8%, signal=17%	NA
REACTOME_P75_NTR_RECEPTOR_MEDIATED_SIGNALLING	REACTOME_P75_NTR_RECEPTOR_MEDIATED_SIGNALLING		78	-0.445934	-1.57135	0.0133929	0.228568	1	3612	tags=35%, list=17%, signal=41%	NA
PID_EPHA_FWDPATHWAY	PID_EPHA_FWDPATHWAY		34	-0.521848	-1.57085	0.0302013	0.226549	1	1969	tags=21%, list=9%, signal=23%	NA
PID_ERBB4_PATHWAY	PID_ERBB4_PATHWAY		37	-0.516637	-1.57061	0.0299501	0.224289	1	2509	tags=41%, list=12%, signal=46%	NA
KEGG_VALINE_LEUCINE_AND_ISOLEUCINE_DEGRADATION	KEGG_VALINE_LEUCINE_AND_ISOLEUCINE_DEGRADATION		44	-0.499292	-1.56973	0.0298507	0.222991	1	3706	tags=48%, list=17%, signal=57%	NA
REACTOME_FATTY_ACYL_COA_BIOSYNTHESIS	REACTOME_FATTY_ACYL_COA_BIOSYNTHESIS		18	-0.586057	-1.56851	0.0538033	0.222454	1	1632	tags=28%, list=8%, signal=30%	NA
REACTOME_TRANSPORT_OF_GLUCOSE_AND_OTHER_SUGARS_BILE_SALTS_AND_ORGANIC_ACIDS_METAL_IONS_AND_AMINE_COMPOUNDS	REACTOME_TRANSPORT_OF_GLUCOSE_AND_OTHER_SUGARS_BILE_SALTS_AND_ORGANIC_ACIDS_METAL_IONS_AND_AMINE_COMPOUNDS		89	-0.43803	-1.56682	0.0177253	0.222534	1	2534	tags=19%, list=12%, signal=22%	NA
REACTOME_SIGNALING_BY_TGF_BETA_RECEPTOR_COMPLEX	REACTOME_SIGNALING_BY_TGF_BETA_RECEPTOR_COMPLEX		60	-0.459355	-1.5648	0.0197568	0.223157	1	3570	tags=45%, list=16%, signal=54%	NA
REACTOME_MEMBRANE_TRAFFICKING	REACTOME_MEMBRANE_TRAFFICKING		124	-0.413113	-1.56112	0.01443	0.22631	1	4938	tags=42%, list=23%, signal=54%	NA
BIOCARTA_GH_PATHWAY	BIOCARTA_GH_PATHWAY		28	-0.528136	-1.55909	0.0324232	0.226846	1	4553	tags=57%, list=21%, signal=72%	NA
HALLMARK_APOPTOSIS	HALLMARK_APOPTOSIS		160	-0.40201	-1.55904	0.00667557	0.224465	1	1944	tags=25%, list=9%, signal=27%	NA
HALLMARK_ADIPOGENESIS	HALLMARK_ADIPOGENESIS		196	-0.392402	-1.5571	0.00132979	0.224761	1	3556	tags=32%, list=16%, signal=38%	NA
REACTOME_PLATELET_SENSITIZATION_BY_LDL	REACTOME_PLATELET_SENSITIZATION_BY_LDL		15	-0.610173	-1.55569	0.0579151	0.224516	1	2175	tags=27%, list=10%, signal=30%	NA
PID_ECADHERIN_NASCENT_AJ_PATHWAY	PID_ECADHERIN_NASCENT_AJ_PATHWAY		39	-0.500502	-1.55001	0.0341463	0.231274	1	2123	tags=31%, list=10%, signal=34%	NA
BIOCARTA_CDC42RAC_PATHWAY	BIOCARTA_CDC42RAC_PATHWAY		16	-0.610468	-1.54945	0.0326296	0.229654	1	4144	tags=56%, list=19%, signal=70%	NA
HALLMARK_COAGULATION	HALLMARK_COAGULATION		135	-0.408366	-1.54566	0.00422535	0.233033	1	790	tags=12%, list=4%, signal=12%	NA
PID_EPHRINB_REV_PATHWAY	PID_EPHRINB_REV_PATHWAY		30	-0.5337	-1.54531	0.0333333	0.231112	1	3491	tags=37%, list=16%, signal=44%	NA
KEGG_STEROID_BIOSYNTHESIS	KEGG_STEROID_BIOSYNTHESIS		16	-0.608732	-1.54526	0.0483871	0.22894	1	1180	tags=38%, list=5%, signal=40%	NA
BIOCARTA_CREB_PATHWAY	BIOCARTA_CREB_PATHWAY		27	-0.537808	-1.54399	0.0437828	0.228649	1	2132	tags=41%, list=10%, signal=45%	NA
PID_ERBB1_INTERNALIZATION_PATHWAY	PID_ERBB1_INTERNALIZATION_PATHWAY		41	-0.491814	-1.54395	0.0264463	0.226439	1	3876	tags=51%, list=18%, signal=62%	NA
KEGG_ARRHYTHMOGENIC_RIGHT_VENTRICULAR_CARDIOMYOPATHY_ARVC	KEGG_ARRHYTHMOGENIC_RIGHT_VENTRICULAR_CARDIOMYOPATHY_ARVC		74	-0.446057	-1.54259	0.00931677	0.226228	1	1951	tags=16%, list=9%, signal=18%	NA
PID_INTEGRIN_A4B1_PATHWAY	PID_INTEGRIN_A4B1_PATHWAY		33	-0.520686	-1.5422	0.0299003	0.224578	1	2290	tags=33%, list=11%, signal=37%	NA
HALLMARK_INFLAMMATORY_RESPONSE	HALLMARK_INFLAMMATORY_RESPONSE		199	-0.385179	-1.54199	0.0012837	0.222684	1	1566	tags=18%, list=7%, signal=19%	NA
REACTOME_IMMUNE_SYSTEM	REACTOME_IMMUNE_SYSTEM		885	-0.348982	-1.54115	0	0.221859	1	3178	tags=26%, list=15%, signal=29%	NA
REACTOME_ADAPTIVE_IMMUNE_SYSTEM	REACTOME_ADAPTIVE_IMMUNE_SYSTEM		505	-0.356665	-1.53288	0.00111857	0.232488	1	3784	tags=30%, list=17%, signal=36%	NA
BIOCARTA_CHEMICAL_PATHWAY	BIOCARTA_CHEMICAL_PATHWAY		22	-0.563077	-1.53027	0.0485981	0.234341	1	1319	tags=36%, list=6%, signal=39%	NA
PID_TAP63_PATHWAY	PID_TAP63_PATHWAY		54	-0.462096	-1.53016	0.0454545	0.232437	1	1453	tags=20%, list=7%, signal=22%	NA
HALLMARK_FATTY_ACID_METABOLISM	HALLMARK_FATTY_ACID_METABOLISM		158	-0.397962	-1.52771	0.00983146	0.234112	1	3608	tags=34%, list=17%, signal=40%	NA
HALLMARK_PEROXISOME	HALLMARK_PEROXISOME		103	-0.41811	-1.52544	0.0170455	0.235416	1	3662	tags=34%, list=17%, signal=41%	NA
PID_VEGFR1_PATHWAY	PID_VEGFR1_PATHWAY		26	-0.539695	-1.52058	0.0387858	0.240502	1	2927	tags=35%, list=14%, signal=40%	NA
REACTOME_TIE2_SIGNALING	REACTOME_TIE2_SIGNALING		17	-0.597631	-1.51877	0.0541045	0.241459	1	3170	tags=47%, list=15%, signal=55%	NA
HALLMARK_HEME_METABOLISM	HALLMARK_HEME_METABOLISM		197	-0.387108	-1.51864	0.0103493	0.239518	1	3387	tags=30%, list=16%, signal=36%	NA
PID_RAC1_PATHWAY	PID_RAC1_PATHWAY		54	-0.466401	-1.51775	0.028169	0.23894	1	4061	tags=43%, list=19%, signal=52%	NA
REACTOME_GPVI_MEDIATED_ACTIVATION_CASCADE	REACTOME_GPVI_MEDIATED_ACTIVATION_CASCADE		31	-0.511013	-1.51733	0.0340136	0.237683	1	1969	tags=32%, list=9%, signal=35%	NA
REACTOME_PRE_NOTCH_PROCESSING_IN_GOLGI	REACTOME_PRE_NOTCH_PROCESSING_IN_GOLGI		16	-0.594072	-1.51467	0.0662983	0.239342	1	4463	tags=63%, list=21%, signal=79%	NA
REACTOME_CYTOCHROME_P450_ARRANGED_BY_SUBSTRATE_TYPE	REACTOME_CYTOCHROME_P450_ARRANGED_BY_SUBSTRATE_TYPE		50	-0.464931	-1.50896	0.0258481	0.246449	1	361	tags=6%, list=2%, signal=6%	NA
PID_P75_NTR_PATHWAY	PID_P75_NTR_PATHWAY		69	-0.443401	-1.50807	0.0344288	0.24575	1	2909	tags=32%, list=13%, signal=37%	NA
REACTOME_SYNTHESIS_OF_PIPS_AT_THE_GOLGI_MEMBRANE	REACTOME_SYNTHESIS_OF_PIPS_AT_THE_GOLGI_MEMBRANE		17	-0.573675	-1.50755	0.0560579	0.244501	1	3285	tags=41%, list=15%, signal=49%	NA
KEGG_SPHINGOLIPID_METABOLISM	KEGG_SPHINGOLIPID_METABOLISM		40	-0.481995	-1.50659	0.0413223	0.243943	1	3398	tags=35%, list=16%, signal=41%	NA
HALLMARK_P53_PATHWAY	HALLMARK_P53_PATHWAY		198	-0.381809	-1.50657	0.00265252	0.242023	1	3203	tags=31%, list=15%, signal=36%	NA
ST_G_ALPHA_I_PATHWAY	ST_G_ALPHA_I_PATHWAY		35	-0.495445	-1.50638	0.0454545	0.240273	1	3403	tags=34%, list=16%, signal=41%	NA
HALLMARK_ANDROGEN_RESPONSE	HALLMARK_ANDROGEN_RESPONSE		100	-0.41209	-1.50583	0.0200573	0.239194	1	3402	tags=35%, list=16%, signal=41%	NA
PID_SYNDECAN_4_PATHWAY	PID_SYNDECAN_4_PATHWAY		32	-0.500259	-1.50438	0.0412371	0.239767	1	1969	tags=31%, list=9%, signal=34%	NA
REACTOME_INNATE_IMMUNE_SYSTEM	REACTOME_INNATE_IMMUNE_SYSTEM		264	-0.36598	-1.50221	0.00245098	0.241475	1	2597	tags=23%, list=12%, signal=26%	NA
KEGG_ARACHIDONIC_ACID_METABOLISM	KEGG_ARACHIDONIC_ACID_METABOLISM		58	-0.453416	-1.49966	0.0349206	0.243768	1	2038	tags=17%, list=9%, signal=19%	NA
REACTOME_FATTY_ACID_TRIACYLGLYCEROL_AND_KETONE_BODY_METABOLISM	REACTOME_FATTY_ACID_TRIACYLGLYCEROL_AND_KETONE_BODY_METABOLISM		167	-0.381452	-1.49878	0.0159151	0.243122	1	3607	tags=33%, list=17%, signal=39%	NA
PID_NECTIN_PATHWAY	PID_NECTIN_PATHWAY		30	-0.505081	-1.49785	0.0391517	0.242708	1	2196	tags=33%, list=10%, signal=37%	NA
REACTOME_RIG_I_MDA5_MEDIATED_INDUCTION_OF_IFN_ALPHA_BETA_PATHWAYS	REACTOME_RIG_I_MDA5_MEDIATED_INDUCTION_OF_IFN_ALPHA_BETA_PATHWAYS		72	-0.42848	-1.49763	0.0273556	0.241315	1	3570	tags=31%, list=16%, signal=36%	NA
BIOCARTA_TFF_PATHWAY	BIOCARTA_TFF_PATHWAY		21	-0.55357	-1.4931	0.06	0.246499	1	3450	tags=57%, list=16%, signal=68%	NA
REACTOME_DOWNSTREAM_TCR_SIGNALING	REACTOME_DOWNSTREAM_TCR_SIGNALING		33	-0.49744	-1.48925	0.0526316	0.250559	1	3930	tags=42%, list=18%, signal=52%	NA
REACTOME_REGULATION_OF_SIGNALING_BY_CBL	REACTOME_REGULATION_OF_SIGNALING_BY_CBL		18	-0.561878	-1.48406	0.0693241	0.257449	1	3593	tags=50%, list=17%, signal=60%	NA
REACTOME_NEPHRIN_INTERACTIONS	REACTOME_NEPHRIN_INTERACTIONS		19	-0.545707	-1.4809	0.0545455	0.260437	1	2642	tags=47%, list=12%, signal=54%	NA
REACTOME_G_ALPHA1213_SIGNALLING_EVENTS	REACTOME_G_ALPHA1213_SIGNALLING_EVENTS		74	-0.42184	-1.47684	0.0295031	0.265145	1	3612	tags=30%, list=17%, signal=36%	NA
KEGG_PROPANOATE_METABOLISM	KEGG_PROPANOATE_METABOLISM		32	-0.492033	-1.47619	0.0615385	0.264139	1	3517	tags=38%, list=16%, signal=45%	NA
KEGG_PENTOSE_PHOSPHATE_PATHWAY	KEGG_PENTOSE_PHOSPHATE_PATHWAY		26	-0.51535	-1.47601	0.0783646	0.262462	1	805	tags=19%, list=4%, signal=20%	NA
KEGG_TGF_BETA_SIGNALING_PATHWAY	KEGG_TGF_BETA_SIGNALING_PATHWAY		85	-0.416402	-1.47454	0.0266272	0.262847	1	2746	tags=25%, list=13%, signal=28%	NA
BIOCARTA_CCR3_PATHWAY	BIOCARTA_CCR3_PATHWAY		23	-0.53479	-1.47443	0.0634648	0.26114	1	2647	tags=35%, list=12%, signal=40%	NA
ST_DIFFERENTIATION_PATHWAY_IN_PC12_CELLS	ST_DIFFERENTIATION_PATHWAY_IN_PC12_CELLS		45	-0.463055	-1.47391	0.0498282	0.260298	1	3911	tags=42%, list=18%, signal=51%	NA
KEGG_ALDOSTERONE_REGULATED_SODIUM_REABSORPTION	KEGG_ALDOSTERONE_REGULATED_SODIUM_REABSORPTION		42	-0.469772	-1.47183	0.0480132	0.261679	1	2121	tags=26%, list=10%, signal=29%	NA
REACTOME_NUCLEAR_SIGNALING_BY_ERBB4	REACTOME_NUCLEAR_SIGNALING_BY_ERBB4		38	-0.481472	-1.47179	0.045677	0.259919	1	3677	tags=34%, list=17%, signal=41%	NA
REACTOME_TCR_SIGNALING	REACTOME_TCR_SIGNALING		50	-0.454143	-1.47083	0.0437601	0.259892	1	2507	tags=28%, list=12%, signal=32%	NA
REACTOME_CLASS_I_MHC_MEDIATED_ANTIGEN_PROCESSING_PRESENTATION	REACTOME_CLASS_I_MHC_MEDIATED_ANTIGEN_PROCESSING_PRESENTATION		234	-0.361127	-1.47068	0.0116732	0.258295	1	3784	tags=33%, list=17%, signal=40%	NA
PID_INTEGRIN2_PATHWAY	PID_INTEGRIN2_PATHWAY		29	-0.505941	-1.47007	0.0518135	0.257315	1	742	tags=21%, list=3%, signal=21%	NA
REACTOME_NEGATIVE_REGULATORS_OF_RIG_I_MDA5_SIGNALING	REACTOME_NEGATIVE_REGULATORS_OF_RIG_I_MDA5_SIGNALING		30	-0.491706	-1.46535	0.0670103	0.262771	1	3570	tags=43%, list=16%, signal=52%	NA
PID_P53_DOWNSTREAM_PATHWAY	PID_P53_DOWNSTREAM_PATHWAY		136	-0.38231	-1.46508	0.0154494	0.261451	1	3041	tags=29%, list=14%, signal=33%	NA
BIOCARTA_SPPA_PATHWAY	BIOCARTA_SPPA_PATHWAY		22	-0.524354	-1.46451	0.0747331	0.260455	1	2556	tags=32%, list=12%, signal=36%	NA
REACTOME_FACTORS_INVOLVED_IN_MEGAKARYOCYTE_DEVELOPMENT_AND_PLATELET_PRODUCTION	REACTOME_FACTORS_INVOLVED_IN_MEGAKARYOCYTE_DEVELOPMENT_AND_PLATELET_PRODUCTION		128	-0.387424	-1.46377	0.0240113	0.259824	1	2581	tags=23%, list=12%, signal=26%	NA
PID_TRKR_PATHWAY	PID_TRKR_PATHWAY		62	-0.432924	-1.4608	0.0364188	0.262734	1	3911	tags=39%, list=18%, signal=47%	NA
PID_BMP_PATHWAY	PID_BMP_PATHWAY		42	-0.465898	-1.45727	0.0539683	0.266273	1	3061	tags=36%, list=14%, signal=42%	NA
REACTOME_GLYCOSPHINGOLIPID_METABOLISM	REACTOME_GLYCOSPHINGOLIPID_METABOLISM		38	-0.473867	-1.45576	0.0553691	0.267311	1	2830	tags=26%, list=13%, signal=30%	NA
SA_PTEN_PATHWAY	SA_PTEN_PATHWAY		17	-0.568187	-1.45507	0.0819672	0.266568	1	2509	tags=53%, list=12%, signal=60%	NA
BIOCARTA_EGF_PATHWAY	BIOCARTA_EGF_PATHWAY		31	-0.49803	-1.45239	0.0584416	0.269429	1	3677	tags=48%, list=17%, signal=58%	NA
HALLMARK_UV_RESPONSE_DN	HALLMARK_UV_RESPONSE_DN		144	-0.37874	-1.45153	0.0195531	0.269026	1	2443	tags=26%, list=11%, signal=29%	NA
KEGG_CHRONIC_MYELOID_LEUKEMIA	KEGG_CHRONIC_MYELOID_LEUKEMIA		73	-0.423492	-1.45086	0.0375375	0.26826	1	3170	tags=36%, list=15%, signal=42%	NA
KEGG_VIRAL_MYOCARDITIS	KEGG_VIRAL_MYOCARDITIS		67	-0.426293	-1.44974	0.0299213	0.268471	1	4216	tags=36%, list=19%, signal=44%	NA
PID_CDC42_PATHWAY	PID_CDC42_PATHWAY		70	-0.417663	-1.44948	0.0375	0.267201	1	3866	tags=39%, list=18%, signal=47%	NA
KEGG_GLIOMA	KEGG_GLIOMA		65	-0.429868	-1.44601	0.045677	0.271231	1	2509	tags=29%, list=12%, signal=33%	NA
ST_G_ALPHA_S_PATHWAY	ST_G_ALPHA_S_PATHWAY		16	-0.565319	-1.43962	0.0847784	0.279696	1	1889	tags=25%, list=9%, signal=27%	NA
BIOCARTA_TPO_PATHWAY	BIOCARTA_TPO_PATHWAY		24	-0.51436	-1.43853	0.0883978	0.279623	1	2509	tags=38%, list=12%, signal=42%	NA
KEGG_ERBB_SIGNALING_PATHWAY	KEGG_ERBB_SIGNALING_PATHWAY		87	-0.404283	-1.43852	0.0397163	0.277903	1	3677	tags=34%, list=17%, signal=41%	NA
REACTOME_INHIBITION_OF_VOLTAGE_GATED_CA2_CHANNELS_VIA_GBETA_GAMMA_SUBUNITS	REACTOME_INHIBITION_OF_VOLTAGE_GATED_CA2_CHANNELS_VIA_GBETA_GAMMA_SUBUNITS		25	-0.515985	-1.43756	0.0808824	0.277642	1	8	tags=4%, list=0%, signal=4%	NA
KEGG_NATURAL_KILLER_CELL_MEDIATED_CYTOTOXICITY	KEGG_NATURAL_KILLER_CELL_MEDIATED_CYTOTOXICITY		131	-0.384903	-1.43755	0.0286885	0.275962	1	3170	tags=28%, list=15%, signal=33%	NA
KEGG_ENDOMETRIAL_CANCER	KEGG_ENDOMETRIAL_CANCER		52	-0.438835	-1.43695	0.0495868	0.275304	1	3177	tags=35%, list=15%, signal=40%	NA
REACTOME_G_PROTEIN_BETA_GAMMA_SIGNALLING	REACTOME_G_PROTEIN_BETA_GAMMA_SIGNALLING		28	-0.493537	-1.43669	0.0725664	0.274009	1	1969	tags=21%, list=9%, signal=24%	NA
KEGG_RENAL_CELL_CARCINOMA	KEGG_RENAL_CELL_CARCINOMA		70	-0.412376	-1.43484	0.0540958	0.275345	1	3965	tags=39%, list=18%, signal=47%	NA
BIOCARTA_CCR5_PATHWAY	BIOCARTA_CCR5_PATHWAY		17	-0.566044	-1.43308	0.0860215	0.276639	1	507	tags=24%, list=2%, signal=24%	NA
REACTOME_REGULATION_OF_INSULIN_SECRETION_BY_GLUCAGON_LIKE_PEPTIDE1	REACTOME_REGULATION_OF_INSULIN_SECRETION_BY_GLUCAGON_LIKE_PEPTIDE1		42	-0.46083	-1.43043	0.0657051	0.279426	1	2123	tags=21%, list=10%, signal=24%	NA
KEGG_MTOR_SIGNALING_PATHWAY	KEGG_MTOR_SIGNALING_PATHWAY		52	-0.443974	-1.4297	0.0703518	0.279136	1	2296	tags=35%, list=11%, signal=39%	NA
REACTOME_SMAD2_SMAD3_SMAD4_HETEROTRIMER_REGULATES_TRANSCRIPTION	REACTOME_SMAD2_SMAD3_SMAD4_HETEROTRIMER_REGULATES_TRANSCRIPTION		25	-0.512268	-1.42732	0.101266	0.281073	1	3508	tags=48%, list=16%, signal=57%	NA
REACTOME_CYTOKINE_SIGNALING_IN_IMMUNE_SYSTEM	REACTOME_CYTOKINE_SIGNALING_IN_IMMUNE_SYSTEM		262	-0.35256	-1.42479	0.00637755	0.283395	1	3075	tags=29%, list=14%, signal=33%	NA
BIOCARTA_P53HYPOXIA_PATHWAY	BIOCARTA_P53HYPOXIA_PATHWAY		22	-0.503771	-1.42431	0.0807018	0.282521	1	1042	tags=27%, list=5%, signal=29%	NA
KEGG_FC_GAMMA_R_MEDIATED_PHAGOCYTOSIS	KEGG_FC_GAMMA_R_MEDIATED_PHAGOCYTOSIS		96	-0.394968	-1.42309	0.0327635	0.282897	1	3190	tags=32%, list=15%, signal=38%	NA
BIOCARTA_IL22BP_PATHWAY	BIOCARTA_IL22BP_PATHWAY		16	-0.552518	-1.42229	0.105263	0.282545	1	5960	tags=69%, list=28%, signal=95%	NA
PID_LYSOPHOSPHOLIPID_PATHWAY	PID_LYSOPHOSPHOLIPID_PATHWAY		66	-0.412126	-1.42189	0.0555556	0.28158	1	1969	tags=21%, list=9%, signal=23%	NA
REACTOME_PI3K_EVENTS_IN_ERBB4_SIGNALING	REACTOME_PI3K_EVENTS_IN_ERBB4_SIGNALING		36	-0.469795	-1.41979	0.0639731	0.283378	1	1797	tags=28%, list=8%, signal=30%	NA
PID_GMCSF_PATHWAY	PID_GMCSF_PATHWAY		37	-0.458988	-1.41967	0.0809917	0.281907	1	3170	tags=46%, list=15%, signal=54%	NA
PID_ANGIOPOIETIN_RECEPTOR_PATHWAY	PID_ANGIOPOIETIN_RECEPTOR_PATHWAY		50	-0.434686	-1.41865	0.0536913	0.281944	1	3677	tags=40%, list=17%, signal=48%	NA
KEGG_ETHER_LIPID_METABOLISM	KEGG_ETHER_LIPID_METABOLISM		33	-0.466334	-1.41853	0.0663265	0.28058	1	2904	tags=27%, list=13%, signal=31%	NA
BIOCARTA_EDG1_PATHWAY	BIOCARTA_EDG1_PATHWAY		27	-0.507355	-1.41813	0.072695	0.279592	1	1969	tags=33%, list=9%, signal=37%	NA
PID_AVB3_INTEGRIN_PATHWAY	PID_AVB3_INTEGRIN_PATHWAY		75	-0.41002	-1.41743	0.056231	0.279014	1	2927	tags=25%, list=14%, signal=29%	NA
REACTOME_O_LINKED_GLYCOSYLATION_OF_MUCINS	REACTOME_O_LINKED_GLYCOSYLATION_OF_MUCINS		50	-0.439125	-1.41739	0.0644172	0.277566	1	2351	tags=20%, list=11%, signal=22%	NA
PID_ERBB_NETWORK_PATHWAY	PID_ERBB_NETWORK_PATHWAY		15	-0.567098	-1.41736	0.0831826	0.276098	1	34	tags=7%, list=0%, signal=7%	NA
KEGG_PEROXISOME	KEGG_PEROXISOME		78	-0.402144	-1.41547	0.0502216	0.277657	1	3840	tags=37%, list=18%, signal=45%	NA
PID_EPO_PATHWAY	PID_EPO_PATHWAY		34	-0.470043	-1.41521	0.0754717	0.276683	1	3677	tags=47%, list=17%, signal=57%	NA
KEGG_PPAR_SIGNALING_PATHWAY	KEGG_PPAR_SIGNALING_PATHWAY		68	-0.409326	-1.41279	0.0614439	0.279035	1	1632	tags=18%, list=8%, signal=19%	NA
REACTOME_SPHINGOLIPID_DE_NOVO_BIOSYNTHESIS	REACTOME_SPHINGOLIPID_DE_NOVO_BIOSYNTHESIS		30	-0.483679	-1.41195	0.0703764	0.278801	1	3398	tags=40%, list=16%, signal=47%	NA
REACTOME_ION_TRANSPORT_BY_P_TYPE_ATPASES	REACTOME_ION_TRANSPORT_BY_P_TYPE_ATPASES		33	-0.464472	-1.40841	0.0785953	0.283341	1	3734	tags=36%, list=17%, signal=44%	NA
REACTOME_BIOLOGICAL_OXIDATIONS	REACTOME_BIOLOGICAL_OXIDATIONS		136	-0.374593	-1.4077	0.0250348	0.283087	1	3074	tags=18%, list=14%, signal=20%	NA
KEGG_APOPTOSIS	KEGG_APOPTOSIS		86	-0.391514	-1.40687	0.0573529	0.282875	1	2042	tags=27%, list=9%, signal=29%	NA
SA_TRKA_RECEPTOR	SA_TRKA_RECEPTOR		17	-0.539597	-1.40212	0.112875	0.28921	1	3177	tags=53%, list=15%, signal=62%	NA
KEGG_EPITHELIAL_CELL_SIGNALING_IN_HELICOBACTER_PYLORI_INFECTION	KEGG_EPITHELIAL_CELL_SIGNALING_IN_HELICOBACTER_PYLORI_INFECTION		68	-0.40568	-1.39803	0.0509259	0.294253	1	3055	tags=26%, list=14%, signal=31%	NA
REACTOME_GOLGI_ASSOCIATED_VESICLE_BIOGENESIS	REACTOME_GOLGI_ASSOCIATED_VESICLE_BIOGENESIS		50	-0.430224	-1.39802	0.0645695	0.292736	1	4938	tags=46%, list=23%, signal=59%	NA
BIOCARTA_SPRY_PATHWAY	BIOCARTA_SPRY_PATHWAY		18	-0.53024	-1.39575	0.102473	0.294762	1	2927	tags=39%, list=14%, signal=45%	NA
REACTOME_SIGNALLING_BY_NGF	REACTOME_SIGNALLING_BY_NGF		211	-0.349898	-1.39216	0.0218509	0.299599	1	3976	tags=34%, list=18%, signal=41%	NA
REACTOME_PEPTIDE_LIGAND_BINDING_RECEPTORS	REACTOME_PEPTIDE_LIGAND_BINDING_RECEPTORS		176	-0.351564	-1.3901	0.0241611	0.301683	1	1005	tags=9%, list=5%, signal=9%	NA
REACTOME_SIGNALING_BY_ERBB4	REACTOME_SIGNALING_BY_ERBB4		87	-0.389685	-1.38926	0.0491071	0.301467	1	4044	tags=38%, list=19%, signal=46%	NA
KEGG_NON_SMALL_CELL_LUNG_CANCER	KEGG_NON_SMALL_CELL_LUNG_CANCER		54	-0.421764	-1.38805	0.0733652	0.30185	1	2212	tags=31%, list=10%, signal=35%	NA
KEGG_NICOTINATE_AND_NICOTINAMIDE_METABOLISM	KEGG_NICOTINATE_AND_NICOTINAMIDE_METABOLISM		22	-0.512175	-1.38708	0.124126	0.302176	1	2522	tags=23%, list=12%, signal=26%	NA
KEGG_DILATED_CARDIOMYOPATHY	KEGG_DILATED_CARDIOMYOPATHY		90	-0.390107	-1.38534	0.0543933	0.303444	1	2024	tags=17%, list=9%, signal=18%	NA
KEGG_INSULIN_SIGNALING_PATHWAY	KEGG_INSULIN_SIGNALING_PATHWAY		137	-0.363494	-1.38409	0.0392707	0.303976	1	3216	tags=28%, list=15%, signal=32%	NA
HALLMARK_IL6_JAK_STAT3_SIGNALING	HALLMARK_IL6_JAK_STAT3_SIGNALING		86	-0.384643	-1.38401	0.0482269	0.302579	1	3041	tags=29%, list=14%, signal=34%	NA
REACTOME_IL_RECEPTOR_SHC_SIGNALING	REACTOME_IL_RECEPTOR_SHC_SIGNALING		27	-0.483237	-1.38279	0.122164	0.303081	1	2509	tags=37%, list=12%, signal=42%	NA
BIOCARTA_PDGF_PATHWAY	BIOCARTA_PDGF_PATHWAY		32	-0.469549	-1.38218	0.0907504	0.302613	1	3677	tags=50%, list=17%, signal=60%	NA
REACTOME_CITRIC_ACID_CYCLE_TCA_CYCLE	REACTOME_CITRIC_ACID_CYCLE_TCA_CYCLE		19	-0.516538	-1.38097	0.108541	0.303329	1	4805	tags=58%, list=22%, signal=74%	NA
KEGG_JAK_STAT_SIGNALING_PATHWAY	KEGG_JAK_STAT_SIGNALING_PATHWAY		150	-0.356621	-1.37841	0.0411141	0.306285	1	3053	tags=24%, list=14%, signal=28%	NA
KEGG_GLYCOSPHINGOLIPID_BIOSYNTHESIS_GANGLIO_SERIES	KEGG_GLYCOSPHINGOLIPID_BIOSYNTHESIS_GANGLIO_SERIES		15	-0.541576	-1.37531	0.131716	0.310475	1	2844	tags=33%, list=13%, signal=38%	NA
KEGG_PANCREATIC_CANCER	KEGG_PANCREATIC_CANCER		70	-0.39617	-1.37526	0.0700935	0.309051	1	2261	tags=27%, list=10%, signal=30%	NA
REACTOME_IL_3_5_AND_GM_CSF_SIGNALING	REACTOME_IL_3_5_AND_GM_CSF_SIGNALING		43	-0.442142	-1.37305	0.0833333	0.311462	1	3677	tags=42%, list=17%, signal=50%	NA
PID_AR_NONGENOMIC_PATHWAY	PID_AR_NONGENOMIC_PATHWAY		31	-0.470847	-1.37092	0.0981067	0.313519	1	1889	tags=19%, list=9%, signal=21%	NA
REACTOME_PI3K_EVENTS_IN_ERBB2_SIGNALING	REACTOME_PI3K_EVENTS_IN_ERBB2_SIGNALING		42	-0.443571	-1.37074	0.0879121	0.312292	1	1797	tags=24%, list=8%, signal=26%	NA
KEGG_COLORECTAL_CANCER	KEGG_COLORECTAL_CANCER		62	-0.395427	-1.36801	0.0675453	0.315396	1	3540	tags=40%, list=16%, signal=48%	NA
SIG_PIP3_SIGNALING_IN_B_LYMPHOCYTES	SIG_PIP3_SIGNALING_IN_B_LYMPHOCYTES		36	-0.44698	-1.36763	0.0873288	0.314685	1	3113	tags=39%, list=14%, signal=45%	NA
KEGG_UBIQUITIN_MEDIATED_PROTEOLYSIS	KEGG_UBIQUITIN_MEDIATED_PROTEOLYSIS		134	-0.360225	-1.3675	0.0563187	0.313471	1	4388	tags=39%, list=20%, signal=48%	NA
BIOCARTA_TOB1_PATHWAY	BIOCARTA_TOB1_PATHWAY		19	-0.511948	-1.3659	0.110108	0.31473	1	2261	tags=21%, list=10%, signal=23%	NA
PID_FCER1_PATHWAY	PID_FCER1_PATHWAY		61	-0.401411	-1.36479	0.0615142	0.315175	1	3190	tags=34%, list=15%, signal=40%	NA
BIOCARTA_EIF_PATHWAY	BIOCARTA_EIF_PATHWAY		16	-0.527979	-1.36328	0.141527	0.316436	1	4749	tags=69%, list=22%, signal=88%	NA
KEGG_LEISHMANIA_INFECTION	KEGG_LEISHMANIA_INFECTION		68	-0.401193	-1.36223	0.0838608	0.316658	1	2375	tags=26%, list=11%, signal=30%	NA
REACTOME_INWARDLY_RECTIFYING_K_CHANNELS	REACTOME_INWARDLY_RECTIFYING_K_CHANNELS		31	-0.461902	-1.36043	0.109817	0.318239	1	8	tags=3%, list=0%, signal=3%	NA
PID_TRAIL_PATHWAY	PID_TRAIL_PATHWAY		28	-0.480317	-1.35824	0.125899	0.320678	1	3491	tags=46%, list=16%, signal=55%	NA
PID_PTP1B_PATHWAY	PID_PTP1B_PATHWAY		52	-0.413908	-1.35807	0.0961857	0.319509	1	2121	tags=17%, list=10%, signal=19%	NA
REACTOME_G_BETA_GAMMA_SIGNALLING_THROUGH_PI3KGAMMA	REACTOME_G_BETA_GAMMA_SIGNALLING_THROUGH_PI3KGAMMA		25	-0.478083	-1.35545	0.114865	0.322444	1	1969	tags=20%, list=9%, signal=22%	NA
REACTOME_MHC_CLASS_II_ANTIGEN_PRESENTATION	REACTOME_MHC_CLASS_II_ANTIGEN_PRESENTATION		86	-0.378687	-1.35153	0.0863836	0.327622	1	3349	tags=29%, list=15%, signal=34%	NA
REACTOME_PPARA_ACTIVATES_GENE_EXPRESSION	REACTOME_PPARA_ACTIVATES_GENE_EXPRESSION		103	-0.372232	-1.35138	0.0661972	0.32642	1	1832	tags=21%, list=8%, signal=23%	NA
KEGG_TOLL_LIKE_RECEPTOR_SIGNALING_PATHWAY	KEGG_TOLL_LIKE_RECEPTOR_SIGNALING_PATHWAY		102	-0.365271	-1.35069	0.0611354	0.326266	1	2478	tags=25%, list=11%, signal=29%	NA
ST_ADRENERGIC	ST_ADRENERGIC		36	-0.433614	-1.35061	0.12693	0.324971	1	3403	tags=33%, list=16%, signal=39%	NA
ST_PHOSPHOINOSITIDE_3_KINASE_PATHWAY	ST_PHOSPHOINOSITIDE_3_KINASE_PATHWAY		37	-0.437921	-1.34996	0.106969	0.32474	1	2509	tags=35%, list=12%, signal=40%	NA
REACTOME_CHOLESTEROL_BIOSYNTHESIS	REACTOME_CHOLESTEROL_BIOSYNTHESIS		21	-0.492768	-1.34915	0.129663	0.324801	1	1539	tags=29%, list=7%, signal=31%	NA
REACTOME_ASPARAGINE_N_LINKED_GLYCOSYLATION	REACTOME_ASPARAGINE_N_LINKED_GLYCOSYLATION		80	-0.380579	-1.34856	0.0849195	0.324475	1	4263	tags=34%, list=20%, signal=42%	NA
PID_GLYPICAN_1PATHWAY	PID_GLYPICAN_1PATHWAY		27	-0.467935	-1.34762	0.125206	0.324727	1	1615	tags=19%, list=7%, signal=20%	NA
HALLMARK_MTORC1_SIGNALING	HALLMARK_MTORC1_SIGNALING		199	-0.337382	-1.34565	0.0412903	0.32667	1	3625	tags=37%, list=17%, signal=44%	NA
PID_ALK1_PATHWAY	PID_ALK1_PATHWAY		26	-0.474047	-1.3442	0.127622	0.327959	1	2746	tags=35%, list=13%, signal=40%	NA
REACTOME_REGULATION_OF_INSULIN_SECRETION	REACTOME_REGULATION_OF_INSULIN_SECRETION		88	-0.376933	-1.34331	0.083947	0.32798	1	2123	tags=16%, list=10%, signal=18%	NA
PID_ERBB1_RECEPTOR_PROXIMAL_PATHWAY	PID_ERBB1_RECEPTOR_PROXIMAL_PATHWAY		35	-0.441074	-1.3429	0.121911	0.327264	1	3170	tags=40%, list=15%, signal=47%	NA
BIOCARTA_IGF1MTOR_PATHWAY	BIOCARTA_IGF1MTOR_PATHWAY		20	-0.505941	-1.34192	0.144082	0.327527	1	4749	tags=65%, list=22%, signal=83%	NA
BIOCARTA_ARF_PATHWAY	BIOCARTA_ARF_PATHWAY		17	-0.511425	-1.34168	0.155797	0.326559	1	1513	tags=29%, list=7%, signal=32%	NA
BIOCARTA_NFAT_PATHWAY	BIOCARTA_NFAT_PATHWAY		53	-0.411919	-1.33842	0.0990415	0.330979	1	3815	tags=34%, list=18%, signal=41%	NA
PID_ATM_PATHWAY	PID_ATM_PATHWAY		34	-0.432912	-1.33585	0.14188	0.334116	1	3155	tags=35%, list=15%, signal=41%	NA
REACTOME_PROTEOLYTIC_CLEAVAGE_OF_SNARE_COMPLEX_PROTEINS	REACTOME_PROTEOLYTIC_CLEAVAGE_OF_SNARE_COMPLEX_PROTEINS		16	-0.521956	-1.33561	0.149733	0.333091	1	1825	tags=19%, list=8%, signal=20%	NA
KEGG_SMALL_CELL_LUNG_CANCER	KEGG_SMALL_CELL_LUNG_CANCER		84	-0.378517	-1.33546	0.0824742	0.331994	1	2042	tags=21%, list=9%, signal=24%	NA
KEGG_ANTIGEN_PROCESSING_AND_PRESENTATION	KEGG_ANTIGEN_PROCESSING_AND_PRESENTATION		78	-0.378815	-1.33529	0.107739	0.330848	1	3682	tags=32%, list=17%, signal=38%	NA
BIOCARTA_ECM_PATHWAY	BIOCARTA_ECM_PATHWAY		24	-0.475943	-1.33436	0.142612	0.331187	1	2509	tags=46%, list=12%, signal=52%	NA
PID_AP1_PATHWAY	PID_AP1_PATHWAY		70	-0.393526	-1.3332	0.0962145	0.331787	1	1940	tags=21%, list=9%, signal=23%	NA
ST_INTERLEUKIN_4_PATHWAY	ST_INTERLEUKIN_4_PATHWAY		26	-0.472901	-1.33282	0.124786	0.331112	1	2509	tags=35%, list=12%, signal=39%	NA
REACTOME_PI3K_AKT_ACTIVATION	REACTOME_PI3K_AKT_ACTIVATION		36	-0.436532	-1.33244	0.0991735	0.330344	1	1969	tags=33%, list=9%, signal=37%	NA
REACTOME_GASTRIN_CREB_SIGNALLING_PATHWAY_VIA_PKC_AND_MAPK	REACTOME_GASTRIN_CREB_SIGNALLING_PATHWAY_VIA_PKC_AND_MAPK		199	-0.331878	-1.33206	0.0459921	0.329659	1	1947	tags=12%, list=9%, signal=13%	NA
KEGG_NEUROTROPHIN_SIGNALING_PATHWAY	KEGG_NEUROTROPHIN_SIGNALING_PATHWAY		126	-0.353997	-1.32788	0.0659187	0.336045	1	3170	tags=29%, list=15%, signal=34%	NA
PID_RET_PATHWAY	PID_RET_PATHWAY		39	-0.430296	-1.32629	0.120339	0.33756	1	3593	tags=38%, list=17%, signal=46%	NA
SIG_INSULIN_RECEPTOR_PATHWAY_IN_CARDIAC_MYOCYTES	SIG_INSULIN_RECEPTOR_PATHWAY_IN_CARDIAC_MYOCYTES		50	-0.409642	-1.32454	0.115265	0.339235	1	3162	tags=36%, list=15%, signal=42%	NA
REACTOME_G_BETA_GAMMA_SIGNALLING_THROUGH_PLC_BETA	REACTOME_G_BETA_GAMMA_SIGNALLING_THROUGH_PLC_BETA		20	-0.502683	-1.32364	0.153119	0.339488	1	519	tags=10%, list=2%, signal=10%	NA
BIOCARTA_CXCR4_PATHWAY	BIOCARTA_CXCR4_PATHWAY		24	-0.472759	-1.32315	0.159722	0.339081	1	1889	tags=25%, list=9%, signal=27%	NA
PID_HNF3B_PATHWAY	PID_HNF3B_PATHWAY		45	-0.407365	-1.32224	0.11465	0.339362	1	1540	tags=16%, list=7%, signal=17%	NA
REACTOME_FORMATION_OF_FIBRIN_CLOT_CLOTTING_CASCADE	REACTOME_FORMATION_OF_FIBRIN_CLOT_CLOTTING_CASCADE		32	-0.448234	-1.3211	0.135231	0.340039	1	392	tags=6%, list=2%, signal=6%	NA
REACTOME_ANTIVIRAL_MECHANISM_BY_IFN_STIMULATED_GENES	REACTOME_ANTIVIRAL_MECHANISM_BY_IFN_STIMULATED_GENES		65	-0.385336	-1.32026	0.113924	0.340219	1	3075	tags=32%, list=14%, signal=38%	NA
REACTOME_TRAFFICKING_OF_AMPA_RECEPTORS	REACTOME_TRAFFICKING_OF_AMPA_RECEPTORS		27	-0.46842	-1.32018	0.15192	0.339008	1	1270	tags=19%, list=6%, signal=20%	NA
PID_ALPHA_SYNUCLEIN_PATHWAY	PID_ALPHA_SYNUCLEIN_PATHWAY		33	-0.440728	-1.31763	0.122449	0.341846	1	652	tags=12%, list=3%, signal=12%	NA
KEGG_HYPERTROPHIC_CARDIOMYOPATHY_HCM	KEGG_HYPERTROPHIC_CARDIOMYOPATHY_HCM		83	-0.374601	-1.31703	0.0863836	0.341599	1	1877	tags=13%, list=9%, signal=14%	NA
REACTOME_SIGNALING_BY_FGFR1_FUSION_MUTANTS	REACTOME_SIGNALING_BY_FGFR1_FUSION_MUTANTS		18	-0.501604	-1.31297	0.165468	0.347361	1	3677	tags=56%, list=17%, signal=67%	NA
ST_MYOCYTE_AD_PATHWAY	ST_MYOCYTE_AD_PATHWAY		27	-0.452593	-1.30923	0.143357	0.352648	1	1889	tags=19%, list=9%, signal=20%	NA
KEGG_CITRATE_CYCLE_TCA_CYCLE	KEGG_CITRATE_CYCLE_TCA_CYCLE		30	-0.446669	-1.30665	0.136767	0.355805	1	4805	tags=47%, list=22%, signal=60%	NA
HALLMARK_ESTROGEN_RESPONSE_LATE	HALLMARK_ESTROGEN_RESPONSE_LATE		198	-0.332187	-1.30621	0.060567	0.355308	1	1992	tags=17%, list=9%, signal=19%	NA
REACTOME_TRIGLYCERIDE_BIOSYNTHESIS	REACTOME_TRIGLYCERIDE_BIOSYNTHESIS		38	-0.425049	-1.306	0.13073	0.354335	1	1632	tags=21%, list=8%, signal=23%	NA
REACTOME_BRANCHED_CHAIN_AMINO_ACID_CATABOLISM	REACTOME_BRANCHED_CHAIN_AMINO_ACID_CATABOLISM		17	-0.505951	-1.30467	0.167857	0.355556	1	4161	tags=65%, list=19%, signal=80%	NA
BIOCARTA_GCR_PATHWAY	BIOCARTA_GCR_PATHWAY		19	-0.492933	-1.30402	0.177007	0.355475	1	1790	tags=32%, list=8%, signal=34%	NA
REACTOME_PLATELET_HOMEOSTASIS	REACTOME_PLATELET_HOMEOSTASIS		75	-0.370028	-1.30085	0.108397	0.35946	1	1790	tags=9%, list=8%, signal=10%	NA
PID_RHOA_PATHWAY	PID_RHOA_PATHWAY		45	-0.408876	-1.29995	0.15109	0.359723	1	4061	tags=40%, list=19%, signal=49%	NA
BIOCARTA_GSK3_PATHWAY	BIOCARTA_GSK3_PATHWAY		27	-0.446703	-1.2993	0.144385	0.359529	1	2305	tags=30%, list=11%, signal=33%	NA
REACTOME_SIGNALING_BY_BMP	REACTOME_SIGNALING_BY_BMP		22	-0.47061	-1.29929	0.164021	0.35822	1	3570	tags=41%, list=16%, signal=49%	NA
BIOCARTA_VEGF_PATHWAY	BIOCARTA_VEGF_PATHWAY		29	-0.439648	-1.29864	0.164645	0.357993	1	504	tags=17%, list=2%, signal=18%	NA
HALLMARK_PI3K_AKT_MTOR_SIGNALING	HALLMARK_PI3K_AKT_MTOR_SIGNALING		105	-0.356795	-1.29738	0.0951705	0.358905	1	2382	tags=25%, list=11%, signal=28%	NA
BIOCARTA_MTOR_PATHWAY	BIOCARTA_MTOR_PATHWAY		23	-0.46678	-1.29611	0.143872	0.359832	1	4471	tags=57%, list=21%, signal=71%	NA
KEGG_PATHWAYS_IN_CANCER	KEGG_PATHWAYS_IN_CANCER		325	-0.308659	-1.29321	0.0398551	0.363819	1	3593	tags=26%, list=17%, signal=30%	NA
BIOCARTA_BIOPEPTIDES_PATHWAY	BIOCARTA_BIOPEPTIDES_PATHWAY		42	-0.405894	-1.29135	0.127214	0.365899	1	3677	tags=31%, list=17%, signal=37%	NA
REACTOME_REGULATION_OF_IFNA_SIGNALING	REACTOME_REGULATION_OF_IFNA_SIGNALING		24	-0.465612	-1.29093	0.160072	0.365323	1	2086	tags=21%, list=10%, signal=23%	NA
REACTOME_CIRCADIAN_CLOCK	REACTOME_CIRCADIAN_CLOCK		51	-0.391325	-1.28938	0.129784	0.366864	1	2714	tags=35%, list=13%, signal=40%	NA
PID_SYNDECAN_2_PATHWAY	PID_SYNDECAN_2_PATHWAY		33	-0.435389	-1.28848	0.157534	0.3672	1	1969	tags=27%, list=9%, signal=30%	NA
PID_MYC_REPRESS_PATHWAY	PID_MYC_REPRESS_PATHWAY		63	-0.378531	-1.28672	0.144231	0.369123	1	2721	tags=24%, list=13%, signal=27%	NA
REACTOME_TOLL_RECEPTOR_CASCADES	REACTOME_TOLL_RECEPTOR_CASCADES		113	-0.344626	-1.28463	0.0836879	0.37145	1	4297	tags=42%, list=20%, signal=52%	NA
PID_P38_ALPHA_BETA_PATHWAY	PID_P38_ALPHA_BETA_PATHWAY		31	-0.427727	-1.28358	0.141892	0.372052	1	1756	tags=19%, list=8%, signal=21%	NA
KEGG_VEGF_SIGNALING_PATHWAY	KEGG_VEGF_SIGNALING_PATHWAY		75	-0.372071	-1.28346	0.12844	0.370999	1	3190	tags=29%, list=15%, signal=34%	NA
BIOCARTA_PTEN_PATHWAY	BIOCARTA_PTEN_PATHWAY		18	-0.480903	-1.28162	0.187146	0.372918	1	2509	tags=39%, list=12%, signal=44%	NA
KEGG_VASOPRESSIN_REGULATED_WATER_REABSORPTION	KEGG_VASOPRESSIN_REGULATED_WATER_REABSORPTION		43	-0.4084	-1.27963	0.184591	0.375188	1	4223	tags=33%, list=20%, signal=40%	NA
BIOCARTA_CALCINEURIN_PATHWAY	BIOCARTA_CALCINEURIN_PATHWAY		18	-0.494721	-1.27634	0.173214	0.379685	1	1188	tags=22%, list=5%, signal=23%	NA
REACTOME_G_ALPHA_I_SIGNALLING_EVENTS	REACTOME_G_ALPHA_I_SIGNALLING_EVENTS		187	-0.324031	-1.27581	0.0805369	0.379342	1	2005	tags=12%, list=9%, signal=13%	NA
BIOCARTA_TGFB_PATHWAY	BIOCARTA_TGFB_PATHWAY		19	-0.473468	-1.27369	0.187063	0.381956	1	2419	tags=32%, list=11%, signal=36%	NA
REACTOME_ACTIVATION_OF_KAINATE_RECEPTORS_UPON_GLUTAMATE_BINDING	REACTOME_ACTIVATION_OF_KAINATE_RECEPTORS_UPON_GLUTAMATE_BINDING		31	-0.431108	-1.27253	0.158076	0.382673	1	985	tags=10%, list=5%, signal=10%	NA
REACTOME_CELL_CELL_COMMUNICATION	REACTOME_CELL_CELL_COMMUNICATION		118	-0.337238	-1.27191	0.0944993	0.382527	1	2682	tags=20%, list=12%, signal=23%	NA
REACTOME_G_ALPHA_Q_SIGNALLING_EVENTS	REACTOME_G_ALPHA_Q_SIGNALLING_EVENTS		178	-0.322111	-1.26974	0.075	0.385225	1	1513	tags=10%, list=7%, signal=11%	NA
KEGG_FATTY_ACID_METABOLISM	KEGG_FATTY_ACID_METABOLISM		42	-0.405699	-1.26901	0.162562	0.38527	1	3759	tags=33%, list=17%, signal=40%	NA
KEGG_O_GLYCAN_BIOSYNTHESIS	KEGG_O_GLYCAN_BIOSYNTHESIS		27	-0.444589	-1.26779	0.172297	0.386211	1	3510	tags=30%, list=16%, signal=35%	NA
KEGG_INOSITOL_PHOSPHATE_METABOLISM	KEGG_INOSITOL_PHOSPHATE_METABOLISM		54	-0.381845	-1.26574	0.154839	0.388568	1	5217	tags=48%, list=24%, signal=63%	NA
PID_FOXO_PATHWAY	PID_FOXO_PATHWAY		49	-0.389801	-1.26458	0.147249	0.38931	1	3960	tags=43%, list=18%, signal=52%	NA
REACTOME_BMAL1_CLOCK_NPAS2_ACTIVATES_CIRCADIAN_EXPRESSION	REACTOME_BMAL1_CLOCK_NPAS2_ACTIVATES_CIRCADIAN_EXPRESSION		35	-0.417822	-1.26428	0.166954	0.388521	1	2714	tags=37%, list=13%, signal=42%	NA
BIOCARTA_UCALPAIN_PATHWAY	BIOCARTA_UCALPAIN_PATHWAY		18	-0.480197	-1.26402	0.20632	0.387658	1	1969	tags=28%, list=9%, signal=31%	NA
KEGG_FC_EPSILON_RI_SIGNALING_PATHWAY	KEGG_FC_EPSILON_RI_SIGNALING_PATHWAY		79	-0.361051	-1.26103	0.131387	0.391944	1	2132	tags=24%, list=10%, signal=27%	NA
KEGG_GLYCEROPHOSPHOLIPID_METABOLISM	KEGG_GLYCEROPHOSPHOLIPID_METABOLISM		76	-0.356983	-1.26071	0.133438	0.391247	1	3245	tags=24%, list=15%, signal=28%	NA
KEGG_ACUTE_MYELOID_LEUKEMIA	KEGG_ACUTE_MYELOID_LEUKEMIA		57	-0.373876	-1.25976	0.142857	0.391723	1	3677	tags=35%, list=17%, signal=42%	NA
BIOCARTA_IGF1_PATHWAY	BIOCARTA_IGF1_PATHWAY		21	-0.471938	-1.25962	0.210616	0.390675	1	3583	tags=52%, list=17%, signal=63%	NA
BIOCARTA_DC_PATHWAY	BIOCARTA_DC_PATHWAY		22	-0.45372	-1.25805	0.200337	0.392261	1	165	tags=9%, list=1%, signal=9%	NA
KEGG_ENDOCYTOSIS	KEGG_ENDOCYTOSIS		179	-0.318562	-1.25804	0.0859788	0.390979	1	4366	tags=36%, list=20%, signal=44%	NA
REACTOME_PROSTACYCLIN_SIGNALLING_THROUGH_PROSTACYCLIN_RECEPTOR	REACTOME_PROSTACYCLIN_SIGNALLING_THROUGH_PROSTACYCLIN_RECEPTOR		19	-0.469871	-1.2538	0.200743	0.397684	1	8	tags=5%, list=0%, signal=5%	NA
PID_FAK_PATHWAY	PID_FAK_PATHWAY		58	-0.373259	-1.2514	0.165862	0.400924	1	3612	tags=40%, list=17%, signal=47%	NA
KEGG_ALZHEIMERS_DISEASE	KEGG_ALZHEIMERS_DISEASE		154	-0.322637	-1.24951	0.0960219	0.403176	1	4751	tags=32%, list=22%, signal=40%	NA
KEGG_COMPLEMENT_AND_COAGULATION_CASCADES	KEGG_COMPLEMENT_AND_COAGULATION_CASCADES		69	-0.364721	-1.24911	0.142857	0.402593	1	2538	tags=13%, list=12%, signal=15%	NA
KEGG_PROTEIN_EXPORT	KEGG_PROTEIN_EXPORT		24	-0.440492	-1.24488	0.20071	0.409583	1	4343	tags=42%, list=20%, signal=52%	NA
PID_HES_HEY_PATHWAY	PID_HES_HEY_PATHWAY		48	-0.38319	-1.24482	0.171429	0.408406	1	3273	tags=29%, list=15%, signal=34%	NA
BIOCARTA_LONGEVITY_PATHWAY	BIOCARTA_LONGEVITY_PATHWAY		15	-0.492753	-1.24463	0.222423	0.407445	1	3583	tags=53%, list=17%, signal=64%	NA
HALLMARK_MYOGENESIS	HALLMARK_MYOGENESIS		200	-0.312753	-1.24419	0.101282	0.407021	1	1760	tags=13%, list=8%, signal=13%	NA
BIOCARTA_CASPASE_PATHWAY	BIOCARTA_CASPASE_PATHWAY		23	-0.447961	-1.24342	0.190647	0.407089	1	1044	tags=26%, list=5%, signal=27%	NA
REACTOME_IL_2_SIGNALING	REACTOME_IL_2_SIGNALING		41	-0.397885	-1.24248	0.191011	0.407555	1	3170	tags=34%, list=15%, signal=40%	NA
PID_P73PATHWAY	PID_P73PATHWAY		78	-0.350981	-1.24143	0.144526	0.408301	1	2772	tags=27%, list=13%, signal=31%	NA
PID_VEGFR1_2_PATHWAY	PID_VEGFR1_2_PATHWAY		69	-0.359025	-1.24073	0.159196	0.408375	1	2927	tags=28%, list=14%, signal=32%	NA
PID_A6B1_A6B4_INTEGRIN_PATHWAY	PID_A6B1_A6B4_INTEGRIN_PATHWAY		46	-0.386553	-1.23973	0.175041	0.408996	1	2509	tags=20%, list=12%, signal=22%	NA
HALLMARK_HYPOXIA	HALLMARK_HYPOXIA		198	-0.313207	-1.23863	0.0991105	0.409829	1	2134	tags=18%, list=10%, signal=19%	NA
BIOCARTA_LAIR_PATHWAY	BIOCARTA_LAIR_PATHWAY		17	-0.474218	-1.23746	0.204198	0.410723	1	1464	tags=35%, list=7%, signal=38%	NA
KEGG_DORSO_VENTRAL_AXIS_FORMATION	KEGG_DORSO_VENTRAL_AXIS_FORMATION		24	-0.436668	-1.2369	0.202578	0.410491	1	2132	tags=25%, list=10%, signal=28%	NA
REACTOME_SIGNALING_BY_RHO_GTPASES	REACTOME_SIGNALING_BY_RHO_GTPASES		111	-0.336814	-1.23597	0.12931	0.410903	1	3612	tags=27%, list=17%, signal=32%	NA
BIOCARTA_INSULIN_PATHWAY	BIOCARTA_INSULIN_PATHWAY		22	-0.445172	-1.23557	0.226714	0.410457	1	3491	tags=45%, list=16%, signal=54%	NA
REACTOME_ACYL_CHAIN_REMODELLING_OF_PC	REACTOME_ACYL_CHAIN_REMODELLING_OF_PC		22	-0.455569	-1.23488	0.219684	0.410454	1	5416	tags=45%, list=25%, signal=61%	NA
HALLMARK_OXIDATIVE_PHOSPHORYLATION	HALLMARK_OXIDATIVE_PHOSPHORYLATION		199	-0.31175	-1.23472	0.101562	0.409497	1	5034	tags=36%, list=23%, signal=46%	NA
REACTOME_PEROXISOMAL_LIPID_METABOLISM	REACTOME_PEROXISOMAL_LIPID_METABOLISM		20	-0.46218	-1.2336	0.222603	0.410303	1	2537	tags=30%, list=12%, signal=34%	NA
REACTOME_ANTIGEN_PROCESSING_UBIQUITINATION_PROTEASOME_DEGRADATION	REACTOME_ANTIGEN_PROCESSING_UBIQUITINATION_PROTEASOME_DEGRADATION		198	-0.307907	-1.23114	0.100654	0.413814	1	3784	tags=29%, list=17%, signal=35%	NA
PID_FRA_PATHWAY	PID_FRA_PATHWAY		37	-0.400353	-1.22871	0.197595	0.417188	1	1177	tags=16%, list=5%, signal=17%	NA
REACTOME_OXYGEN_DEPENDENT_PROLINE_HYDROXYLATION_OF_HYPOXIA_INDUCIBLE_FACTOR_ALPHA	REACTOME_OXYGEN_DEPENDENT_PROLINE_HYDROXYLATION_OF_HYPOXIA_INDUCIBLE_FACTOR_ALPHA		16	-0.482507	-1.2232	0.225152	0.42685	1	3965	tags=44%, list=18%, signal=54%	NA
REACTOME_GLUCAGON_SIGNALING_IN_METABOLIC_REGULATION	REACTOME_GLUCAGON_SIGNALING_IN_METABOLIC_REGULATION		33	-0.40985	-1.22228	0.204626	0.42737	1	2024	tags=18%, list=9%, signal=20%	NA
REACTOME_ADP_SIGNALLING_THROUGH_P2RY12	REACTOME_ADP_SIGNALLING_THROUGH_P2RY12		21	-0.462071	-1.22167	0.222222	0.427337	1	8	tags=5%, list=0%, signal=5%	NA
KEGG_GNRH_SIGNALING_PATHWAY	KEGG_GNRH_SIGNALING_PATHWAY		101	-0.334545	-1.21892	0.159763	0.431439	1	3177	tags=24%, list=15%, signal=28%	NA
REACTOME_GLUCAGON_TYPE_LIGAND_RECEPTORS	REACTOME_GLUCAGON_TYPE_LIGAND_RECEPTORS		33	-0.407432	-1.21753	0.198653	0.432852	1	8	tags=3%, list=0%, signal=3%	NA
REACTOME_SHC1_EVENTS_IN_ERBB4_SIGNALING	REACTOME_SHC1_EVENTS_IN_ERBB4_SIGNALING		20	-0.453959	-1.21672	0.244681	0.433228	1	3170	tags=30%, list=15%, signal=35%	NA
PID_IL6_7_PATHWAY	PID_IL6_7_PATHWAY		47	-0.381895	-1.2157	0.193344	0.433891	1	2793	tags=30%, list=13%, signal=34%	NA
REACTOME_INTEGRATION_OF_ENERGY_METABOLISM	REACTOME_INTEGRATION_OF_ENERGY_METABOLISM		115	-0.3257	-1.21495	0.141274	0.434229	1	2123	tags=15%, list=10%, signal=16%	NA
KEGG_AUTOIMMUNE_THYROID_DISEASE	KEGG_AUTOIMMUNE_THYROID_DISEASE		49	-0.373926	-1.21376	0.1888	0.435324	1	6247	tags=41%, list=29%, signal=57%	NA
PID_P53_REGULATION_PATHWAY	PID_P53_REGULATION_PATHWAY		59	-0.361802	-1.21311	0.172757	0.435224	1	3491	tags=32%, list=16%, signal=38%	NA
REACTOME_LYSOSOME_VESICLE_BIOGENESIS	REACTOME_LYSOSOME_VESICLE_BIOGENESIS		23	-0.445254	-1.21267	0.227191	0.434858	1	671	tags=17%, list=3%, signal=18%	NA
KEGG_PROSTATE_CANCER	KEGG_PROSTATE_CANCER		89	-0.335325	-1.2125	0.183056	0.433909	1	2360	tags=26%, list=11%, signal=29%	NA
BIOCARTA_IL2RB_PATHWAY	BIOCARTA_IL2RB_PATHWAY		38	-0.386678	-1.2119	0.198052	0.43384	1	3053	tags=39%, list=14%, signal=46%	NA
REACTOME_SIGNALING_BY_PDGF	REACTOME_SIGNALING_BY_PDGF		118	-0.327408	-1.21038	0.14723	0.435545	1	2132	tags=19%, list=10%, signal=21%	NA
PID_REG_GR_PATHWAY	PID_REG_GR_PATHWAY		82	-0.345464	-1.20671	0.202096	0.441633	1	2305	tags=22%, list=11%, signal=24%	NA
BIOCARTA_ERYTH_PATHWAY	BIOCARTA_ERYTH_PATHWAY		15	-0.481892	-1.20665	0.261566	0.440479	1	3583	tags=20%, list=17%, signal=24%	NA
KEGG_GLYCOLYSIS_GLUCONEOGENESIS	KEGG_GLYCOLYSIS_GLUCONEOGENESIS		61	-0.352971	-1.20506	0.189441	0.442532	1	2406	tags=15%, list=11%, signal=17%	NA
PID_P38_MK2_PATHWAY	PID_P38_MK2_PATHWAY		21	-0.437647	-1.20184	0.230912	0.447453	1	3162	tags=33%, list=15%, signal=39%	NA
REACTOME_GLYCOGEN_BREAKDOWN_GLYCOGENOLYSIS	REACTOME_GLYCOGEN_BREAKDOWN_GLYCOGENOLYSIS		16	-0.469896	-1.20111	0.24812	0.44769	1	1819	tags=25%, list=8%, signal=27%	NA
REACTOME_INHIBITION_OF_INSULIN_SECRETION_BY_ADRENALINE_NORADRENALINE	REACTOME_INHIBITION_OF_INSULIN_SECRETION_BY_ADRENALINE_NORADRENALINE		25	-0.425808	-1.20039	0.230132	0.447847	1	8	tags=4%, list=0%, signal=4%	NA
BIOCARTA_FAS_PATHWAY	BIOCARTA_FAS_PATHWAY		30	-0.412229	-1.20034	0.254054	0.446671	1	3491	tags=50%, list=16%, signal=60%	NA
KEGG_CALCIUM_SIGNALING_PATHWAY	KEGG_CALCIUM_SIGNALING_PATHWAY		176	-0.307384	-1.1991	0.148098	0.447785	1	885	tags=7%, list=4%, signal=8%	NA
SIG_BCR_SIGNALING_PATHWAY	SIG_BCR_SIGNALING_PATHWAY		46	-0.377726	-1.19706	0.222042	0.450577	1	2509	tags=30%, list=12%, signal=34%	NA
REACTOME_DESTABILIZATION_OF_MRNA_BY_TRISTETRAPROLIN_TTP	REACTOME_DESTABILIZATION_OF_MRNA_BY_TRISTETRAPROLIN_TTP		17	-0.471042	-1.19573	0.238516	0.451877	1	1673	tags=29%, list=8%, signal=32%	NA
REACTOME_POST_TRANSLATIONAL_PROTEIN_MODIFICATION	REACTOME_POST_TRANSLATIONAL_PROTEIN_MODIFICATION		177	-0.304234	-1.19467	0.159732	0.452639	1	4263	tags=27%, list=20%, signal=33%	NA
REACTOME_RAP1_SIGNALLING	REACTOME_RAP1_SIGNALLING		16	-0.471488	-1.19459	0.250936	0.451469	1	4927	tags=50%, list=23%, signal=65%	NA
REACTOME_THROMBOXANE_SIGNALLING_THROUGH_TP_RECEPTOR	REACTOME_THROMBOXANE_SIGNALLING_THROUGH_TP_RECEPTOR		23	-0.422737	-1.193	0.25734	0.453453	1	1215	tags=13%, list=6%, signal=14%	NA
PID_RETINOIC_ACID_PATHWAY	PID_RETINOIC_ACID_PATHWAY		30	-0.4071	-1.19206	0.217391	0.454161	1	3491	tags=37%, list=16%, signal=44%	NA
REACTOME_INSULIN_SYNTHESIS_AND_PROCESSING	REACTOME_INSULIN_SYNTHESIS_AND_PROCESSING		20	-0.447928	-1.19197	0.258064	0.453087	1	2017	tags=25%, list=9%, signal=28%	NA
PID_TCR_PATHWAY	PID_TCR_PATHWAY		65	-0.345847	-1.19051	0.220949	0.454785	1	3170	tags=25%, list=15%, signal=29%	NA
PID_PRL_SIGNALING_EVENTS_PATHWAY	PID_PRL_SIGNALING_EVENTS_PATHWAY		23	-0.428099	-1.19016	0.246018	0.454226	1	2098	tags=30%, list=10%, signal=34%	NA
PID_ERBB1_DOWNSTREAM_PATHWAY	PID_ERBB1_DOWNSTREAM_PATHWAY		105	-0.326203	-1.18979	0.197691	0.453624	1	3930	tags=37%, list=18%, signal=45%	NA
REACTOME_NGF_SIGNALLING_VIA_TRKA_FROM_THE_PLASMA_MEMBRANE	REACTOME_NGF_SIGNALLING_VIA_TRKA_FROM_THE_PLASMA_MEMBRANE		134	-0.31219	-1.1893	0.166205	0.453408	1	3976	tags=34%, list=18%, signal=42%	NA
REACTOME_GRB2_SOS_PROVIDES_LINKAGE_TO_MAPK_SIGNALING_FOR_INTERGRINS_	REACTOME_GRB2_SOS_PROVIDES_LINKAGE_TO_MAPK_SIGNALING_FOR_INTERGRINS_		15	-0.47283	-1.18843	0.278505	0.453934	1	2132	tags=33%, list=10%, signal=37%	NA
REACTOME_SIGNAL_AMPLIFICATION	REACTOME_SIGNAL_AMPLIFICATION		31	-0.400713	-1.1867	0.252951	0.45618	1	1756	tags=16%, list=8%, signal=18%	NA
PID_BCR_5PATHWAY	PID_BCR_5PATHWAY		65	-0.350399	-1.18564	0.213064	0.456982	1	2509	tags=25%, list=12%, signal=28%	NA
SIG_IL4RECEPTOR_IN_B_LYPHOCYTES	SIG_IL4RECEPTOR_IN_B_LYPHOCYTES		27	-0.412754	-1.18515	0.258064	0.456712	1	2509	tags=37%, list=12%, signal=42%	NA
REACTOME_GENERIC_TRANSCRIPTION_PATHWAY	REACTOME_GENERIC_TRANSCRIPTION_PATHWAY		334	-0.284826	-1.18468	0.117718	0.456354	1	3984	tags=28%, list=18%, signal=34%	NA
REACTOME_PYRUVATE_METABOLISM_AND_CITRIC_ACID_TCA_CYCLE	REACTOME_PYRUVATE_METABOLISM_AND_CITRIC_ACID_TCA_CYCLE		40	-0.378484	-1.18353	0.215126	0.45744	1	2553	tags=28%, list=12%, signal=31%	NA
KEGG_NOD_LIKE_RECEPTOR_SIGNALING_PATHWAY	KEGG_NOD_LIKE_RECEPTOR_SIGNALING_PATHWAY		62	-0.355261	-1.1824	0.220497	0.458341	1	2065	tags=26%, list=10%, signal=28%	NA
PID_MAPK_TRK_PATHWAY	PID_MAPK_TRK_PATHWAY		34	-0.382025	-1.18159	0.253333	0.45865	1	3177	tags=38%, list=15%, signal=45%	NA
REACTOME_EGFR_DOWNREGULATION	REACTOME_EGFR_DOWNREGULATION		24	-0.41989	-1.17854	0.244898	0.463439	1	3075	tags=29%, list=14%, signal=34%	NA
REACTOME_ACTIVATED_AMPK_STIMULATES_FATTY_ACID_OXIDATION_IN_MUSCLE	REACTOME_ACTIVATED_AMPK_STIMULATES_FATTY_ACID_OXIDATION_IN_MUSCLE		18	-0.458133	-1.17752	0.270979	0.464152	1	3136	tags=33%, list=14%, signal=39%	NA
REACTOME_REGULATION_OF_KIT_SIGNALING	REACTOME_REGULATION_OF_KIT_SIGNALING		16	-0.448113	-1.17681	0.248639	0.464216	1	2927	tags=25%, list=14%, signal=29%	NA
KEGG_B_CELL_RECEPTOR_SIGNALING_PATHWAY	KEGG_B_CELL_RECEPTOR_SIGNALING_PATHWAY		74	-0.337174	-1.17604	0.201183	0.46453	1	2382	tags=24%, list=11%, signal=27%	NA
BIOCARTA_PPARA_PATHWAY	BIOCARTA_PPARA_PATHWAY		57	-0.354279	-1.17374	0.231118	0.467936	1	2074	tags=26%, list=10%, signal=29%	NA
KEGG_MELANOMA	KEGG_MELANOMA		71	-0.338146	-1.17348	0.226929	0.467212	1	2395	tags=23%, list=11%, signal=25%	NA
REACTOME_KERATAN_SULFATE_KERATIN_METABOLISM	REACTOME_KERATAN_SULFATE_KERATIN_METABOLISM		30	-0.405499	-1.17216	0.252669	0.468866	1	2844	tags=30%, list=13%, signal=34%	NA
REACTOME_G_PROTEIN_ACTIVATION	REACTOME_G_PROTEIN_ACTIVATION		27	-0.414876	-1.17193	0.268817	0.468104	1	8	tags=4%, list=0%, signal=4%	NA
KEGG_GLYCEROLIPID_METABOLISM	KEGG_GLYCEROLIPID_METABOLISM		48	-0.360241	-1.17026	0.247508	0.470542	1	2615	tags=23%, list=12%, signal=26%	NA
PID_DELTA_NP63_PATHWAY	PID_DELTA_NP63_PATHWAY		47	-0.366638	-1.16927	0.233831	0.47122	1	2770	tags=32%, list=13%, signal=37%	NA
KEGG_HUNTINGTONS_DISEASE	KEGG_HUNTINGTONS_DISEASE		170	-0.297824	-1.16918	0.180837	0.470124	1	5010	tags=28%, list=23%, signal=36%	NA
ST_WNT_CA2_CYCLIC_GMP_PATHWAY	ST_WNT_CA2_CYCLIC_GMP_PATHWAY		20	-0.434562	-1.16911	0.264865	0.469008	1	3403	tags=35%, list=16%, signal=41%	NA
REACTOME_UNFOLDED_PROTEIN_RESPONSE	REACTOME_UNFOLDED_PROTEIN_RESPONSE		79	-0.333604	-1.16902	0.220896	0.467937	1	3887	tags=34%, list=18%, signal=42%	NA
BIOCARTA_ATM_PATHWAY	BIOCARTA_ATM_PATHWAY		20	-0.444409	-1.169	0.272884	0.466745	1	2188	tags=35%, list=10%, signal=39%	NA
KEGG_TYPE_II_DIABETES_MELLITUS	KEGG_TYPE_II_DIABETES_MELLITUS		46	-0.369858	-1.16799	0.240711	0.467508	1	2121	tags=26%, list=10%, signal=29%	NA
KEGG_LONG_TERM_DEPRESSION	KEGG_LONG_TERM_DEPRESSION		70	-0.337923	-1.16671	0.222222	0.468893	1	3698	tags=24%, list=17%, signal=29%	NA
KEGG_OTHER_GLYCAN_DEGRADATION	KEGG_OTHER_GLYCAN_DEGRADATION		16	-0.465411	-1.16579	0.289134	0.469473	1	2787	tags=31%, list=13%, signal=36%	NA
REACTOME_CLASS_A1_RHODOPSIN_LIKE_RECEPTORS	REACTOME_CLASS_A1_RHODOPSIN_LIKE_RECEPTORS		286	-0.281854	-1.16331	0.183272	0.47305	1	1092	tags=7%, list=5%, signal=8%	NA
KEGG_VASCULAR_SMOOTH_MUSCLE_CONTRACTION	KEGG_VASCULAR_SMOOTH_MUSCLE_CONTRACTION		115	-0.312454	-1.16312	0.190265	0.472212	1	4045	tags=25%, list=19%, signal=31%	NA
REACTOME_NEUROTRANSMITTER_RECEPTOR_BINDING_AND_DOWNSTREAM_TRANSMISSION_IN_THE_POSTSYNAPTIC_CELL	REACTOME_NEUROTRANSMITTER_RECEPTOR_BINDING_AND_DOWNSTREAM_TRANSMISSION_IN_THE_POSTSYNAPTIC_CELL		134	-0.301089	-1.16089	0.203966	0.475528	1	2043	tags=12%, list=9%, signal=13%	NA
BIOCARTA_HIVNEF_PATHWAY	BIOCARTA_HIVNEF_PATHWAY		58	-0.347054	-1.16029	0.237232	0.475573	1	1930	tags=24%, list=9%, signal=26%	NA
REACTOME_ADP_SIGNALLING_THROUGH_P2RY1	REACTOME_ADP_SIGNALLING_THROUGH_P2RY1		25	-0.413599	-1.16002	0.291139	0.47493	1	1756	tags=16%, list=8%, signal=17%	NA
BIOCARTA_CARDIACEGF_PATHWAY	BIOCARTA_CARDIACEGF_PATHWAY		18	-0.437603	-1.15817	0.294756	0.47746	1	847	tags=17%, list=4%, signal=17%	NA
KEGG_LONG_TERM_POTENTIATION	KEGG_LONG_TERM_POTENTIATION		68	-0.339599	-1.15709	0.236967	0.47836	1	3815	tags=28%, list=18%, signal=34%	NA
REACTOME_SIGNALING_BY_NOTCH	REACTOME_SIGNALING_BY_NOTCH		96	-0.318056	-1.155	0.215453	0.48148	1	3233	tags=31%, list=15%, signal=37%	NA
BIOCARTA_INTEGRIN_PATHWAY	BIOCARTA_INTEGRIN_PATHWAY		38	-0.366733	-1.15386	0.250435	0.482548	1	3491	tags=37%, list=16%, signal=44%	NA
PID_IL2_1PATHWAY	PID_IL2_1PATHWAY		55	-0.347617	-1.15076	0.260125	0.487732	1	3739	tags=38%, list=17%, signal=46%	NA
REACTOME_DOWNSTREAM_SIGNAL_TRANSDUCTION	REACTOME_DOWNSTREAM_SIGNAL_TRANSDUCTION		91	-0.323161	-1.15008	0.248109	0.487866	1	3976	tags=35%, list=18%, signal=43%	NA
PID_CD8_TCR_PATHWAY	PID_CD8_TCR_PATHWAY		53	-0.348038	-1.14901	0.255452	0.488921	1	3930	tags=30%, list=18%, signal=37%	NA
REACTOME_ANTIGEN_ACTIVATES_B_CELL_RECEPTOR_LEADING_TO_GENERATION_OF_SECOND_MESSENGERS	REACTOME_ANTIGEN_ACTIVATES_B_CELL_RECEPTOR_LEADING_TO_GENERATION_OF_SECOND_MESSENGERS		29	-0.388735	-1.14815	0.268908	0.489446	1	2927	tags=31%, list=14%, signal=36%	NA
REACTOME_HOMOLOGOUS_RECOMBINATION_REPAIR_OF_REPLICATION_INDEPENDENT_DOUBLE_STRAND_BREAKS	REACTOME_HOMOLOGOUS_RECOMBINATION_REPAIR_OF_REPLICATION_INDEPENDENT_DOUBLE_STRAND_BREAKS		16	-0.449578	-1.14694	0.278899	0.490583	1	2842	tags=38%, list=13%, signal=43%	NA
BIOCARTA_PYK2_PATHWAY	BIOCARTA_PYK2_PATHWAY		28	-0.396053	-1.14621	0.299492	0.490864	1	3491	tags=39%, list=16%, signal=47%	NA
PID_ERA_GENOMIC_PATHWAY	PID_ERA_GENOMIC_PATHWAY		64	-0.336415	-1.14376	0.25	0.494528	1	2326	tags=20%, list=11%, signal=23%	NA
REACTOME_ACTIVATED_TLR4_SIGNALLING	REACTOME_ACTIVATED_TLR4_SIGNALLING		91	-0.318046	-1.14361	0.221574	0.493618	1	3609	tags=33%, list=17%, signal=39%	NA
KEGG_BLADDER_CANCER	KEGG_BLADDER_CANCER		42	-0.353096	-1.14226	0.240864	0.495393	1	3170	tags=31%, list=15%, signal=36%	NA
KEGG_TASTE_TRANSDUCTION	KEGG_TASTE_TRANSDUCTION		50	-0.34876	-1.1422	0.26873	0.494287	1	2024	tags=12%, list=9%, signal=13%	NA
HALLMARK_EPITHELIAL_MESENCHYMAL_TRANSITION	HALLMARK_EPITHELIAL_MESENCHYMAL_TRANSITION		198	-0.285387	-1.14062	0.203871	0.49626	1	2228	tags=14%, list=10%, signal=15%	NA
REACTOME_DEFENSINS	REACTOME_DEFENSINS		45	-0.355611	-1.13768	0.275362	0.501466	1	187	tags=4%, list=1%, signal=4%	NA
ST_P38_MAPK_PATHWAY	ST_P38_MAPK_PATHWAY		37	-0.376395	-1.13688	0.300987	0.501803	1	4022	tags=46%, list=19%, signal=56%	NA
REACTOME_MYD88_MAL_CASCADE_INITIATED_ON_PLASMA_MEMBRANE	REACTOME_MYD88_MAL_CASCADE_INITIATED_ON_PLASMA_MEMBRANE		81	-0.325438	-1.13625	0.265487	0.501725	1	3609	tags=35%, list=17%, signal=41%	NA
BIOCARTA_P38MAPK_PATHWAY	BIOCARTA_P38MAPK_PATHWAY		40	-0.368773	-1.13373	0.293532	0.505644	1	3177	tags=38%, list=15%, signal=44%	NA
REACTOME_ION_CHANNEL_TRANSPORT	REACTOME_ION_CHANNEL_TRANSPORT		54	-0.334504	-1.13359	0.25487	0.504659	1	4463	tags=26%, list=21%, signal=33%	NA
REACTOME_TRANSMISSION_ACROSS_CHEMICAL_SYNAPSES	REACTOME_TRANSMISSION_ACROSS_CHEMICAL_SYNAPSES		183	-0.285644	-1.13167	0.228316	0.50751	1	2043	tags=11%, list=9%, signal=13%	NA
REACTOME_GABA_B_RECEPTOR_ACTIVATION	REACTOME_GABA_B_RECEPTOR_ACTIVATION		38	-0.365381	-1.13018	0.286872	0.509412	1	1585	tags=8%, list=7%, signal=9%	NA
BIOCARTA_GLEEVEC_PATHWAY	BIOCARTA_GLEEVEC_PATHWAY		23	-0.405129	-1.129	0.299256	0.510495	1	3677	tags=52%, list=17%, signal=63%	NA
ST_GRANULE_CELL_SURVIVAL_PATHWAY	ST_GRANULE_CELL_SURVIVAL_PATHWAY		27	-0.394302	-1.12798	0.309982	0.511303	1	4162	tags=44%, list=19%, signal=55%	NA
PID_IGF1_PATHWAY	PID_IGF1_PATHWAY		30	-0.382914	-1.12745	0.308219	0.511166	1	4553	tags=50%, list=21%, signal=63%	NA
REACTOME_SIGNALING_BY_EGFR_IN_CANCER	REACTOME_SIGNALING_BY_EGFR_IN_CANCER		105	-0.311456	-1.1274	0.25431	0.510001	1	2132	tags=22%, list=10%, signal=24%	NA
REACTOME_GPCR_LIGAND_BINDING	REACTOME_GPCR_LIGAND_BINDING		387	-0.265629	-1.12678	0.201923	0.510019	1	1126	tags=6%, list=5%, signal=6%	NA
REACTOME_ANTIGEN_PROCESSING_CROSS_PRESENTATION	REACTOME_ANTIGEN_PROCESSING_CROSS_PRESENTATION		70	-0.333476	-1.12569	0.254601	0.511166	1	3625	tags=33%, list=17%, signal=39%	NA
PID_IL23_PATHWAY	PID_IL23_PATHWAY		37	-0.360938	-1.12385	0.306507	0.513632	1	1814	tags=19%, list=8%, signal=21%	NA
KEGG_VIBRIO_CHOLERAE_INFECTION	KEGG_VIBRIO_CHOLERAE_INFECTION		54	-0.340297	-1.12343	0.277049	0.513199	1	4589	tags=31%, list=21%, signal=40%	NA
BIOCARTA_ERK5_PATHWAY	BIOCARTA_ERK5_PATHWAY		18	-0.420783	-1.12214	0.313485	0.514597	1	2509	tags=33%, list=12%, signal=38%	NA
REACTOME_SLC_MEDIATED_TRANSMEMBRANE_TRANSPORT	REACTOME_SLC_MEDIATED_TRANSMEMBRANE_TRANSPORT		238	-0.278185	-1.12182	0.230179	0.514116	1	3051	tags=17%, list=14%, signal=20%	NA
REACTOME_RESPIRATORY_ELECTRON_TRANSPORT	REACTOME_RESPIRATORY_ELECTRON_TRANSPORT		63	-0.328111	-1.11818	0.291541	0.520259	1	6897	tags=54%, list=32%, signal=79%	NA
BIOCARTA_IGF1R_PATHWAY	BIOCARTA_IGF1R_PATHWAY		23	-0.395416	-1.11594	0.318258	0.523625	1	2509	tags=35%, list=12%, signal=39%	NA
BIOCARTA_NGF_PATHWAY	BIOCARTA_NGF_PATHWAY		18	-0.419153	-1.11431	0.317204	0.525782	1	3491	tags=44%, list=16%, signal=53%	NA
KEGG_SNARE_INTERACTIONS_IN_VESICULAR_TRANSPORT	KEGG_SNARE_INTERACTIONS_IN_VESICULAR_TRANSPORT		38	-0.363073	-1.11399	0.313131	0.525222	1	2461	tags=18%, list=11%, signal=21%	NA
PID_SYNDECAN_1_PATHWAY	PID_SYNDECAN_1_PATHWAY		46	-0.348603	-1.1135	0.310811	0.524996	1	388	tags=7%, list=2%, signal=7%	NA
PID_TNF_PATHWAY	PID_TNF_PATHWAY		46	-0.352119	-1.11198	0.30084	0.526899	1	2400	tags=26%, list=11%, signal=29%	NA
REACTOME_MEIOTIC_SYNAPSIS	REACTOME_MEIOTIC_SYNAPSIS		70	-0.319763	-1.11023	0.285498	0.529276	1	3155	tags=26%, list=15%, signal=30%	NA
REACTOME_GRB2_EVENTS_IN_ERBB2_SIGNALING	REACTOME_GRB2_EVENTS_IN_ERBB2_SIGNALING		22	-0.404892	-1.11021	0.333901	0.52808	1	3170	tags=23%, list=15%, signal=27%	NA
REACTOME_TRANSMEMBRANE_TRANSPORT_OF_SMALL_MOLECULES	REACTOME_TRANSMEMBRANE_TRANSPORT_OF_SMALL_MOLECULES		407	-0.258474	-1.10465	0.216057	0.53851	1	3055	tags=16%, list=14%, signal=19%	NA
PID_HIF1_TFPATHWAY	PID_HIF1_TFPATHWAY		65	-0.327552	-1.10384	0.306184	0.538921	1	2368	tags=25%, list=11%, signal=28%	NA
REACTOME_SIGNALING_BY_SCF_KIT	REACTOME_SIGNALING_BY_SCF_KIT		75	-0.314892	-1.10305	0.297806	0.539319	1	2132	tags=21%, list=10%, signal=24%	NA
REACTOME_THROMBIN_SIGNALLING_THROUGH_PROTEINASE_ACTIVATED_RECEPTORS_PARS	REACTOME_THROMBIN_SIGNALLING_THROUGH_PROTEINASE_ACTIVATED_RECEPTORS_PARS		32	-0.361911	-1.10151	0.332226	0.541291	1	1889	tags=16%, list=9%, signal=17%	NA
PID_SMAD2_3PATHWAY	PID_SMAD2_3PATHWAY		17	-0.421943	-1.1015	0.335753	0.540085	1	3508	tags=41%, list=16%, signal=49%	NA
REACTOME_GAB1_SIGNALOSOME	REACTOME_GAB1_SIGNALOSOME		36	-0.36447	-1.10016	0.304878	0.541661	1	1797	tags=25%, list=8%, signal=27%	NA
REACTOME_SIGNALING_BY_ERBB2	REACTOME_SIGNALING_BY_ERBB2		97	-0.303895	-1.10011	0.292719	0.540503	1	2509	tags=21%, list=12%, signal=23%	NA
REACTOME_SIGNALING_BY_CONSTITUTIVELY_ACTIVE_EGFR	REACTOME_SIGNALING_BY_CONSTITUTIVELY_ACTIVE_EGFR		17	-0.426206	-1.09919	0.361328	0.541263	1	3170	tags=47%, list=15%, signal=55%	NA
NABA_ECM_REGULATORS	NABA_ECM_REGULATORS		233	-0.271028	-1.09704	0.265565	0.544572	1	1354	tags=7%, list=6%, signal=8%	NA
ST_ERK1_ERK2_MAPK_PATHWAY	ST_ERK1_ERK2_MAPK_PATHWAY		32	-0.368971	-1.09659	0.331683	0.544285	1	3786	tags=41%, list=17%, signal=49%	NA
REACTOME_LATENT_INFECTION_OF_HOMO_SAPIENS_WITH_MYCOBACTERIUM_TUBERCULOSIS	REACTOME_LATENT_INFECTION_OF_HOMO_SAPIENS_WITH_MYCOBACTERIUM_TUBERCULOSIS		30	-0.373564	-1.09495	0.340278	0.546601	1	3389	tags=27%, list=16%, signal=32%	NA
PID_SMAD2_3NUCLEAR_PATHWAY	PID_SMAD2_3NUCLEAR_PATHWAY		82	-0.306492	-1.09389	0.301471	0.547608	1	2714	tags=27%, list=13%, signal=31%	NA
REACTOME_SIGNALING_BY_FGFR1_MUTANTS	REACTOME_SIGNALING_BY_FGFR1_MUTANTS		29	-0.369395	-1.0928	0.319865	0.548615	1	3677	tags=38%, list=17%, signal=46%	NA
PID_REELIN_PATHWAY	PID_REELIN_PATHWAY		28	-0.380794	-1.08988	0.342762	0.553472	1	3491	tags=39%, list=16%, signal=47%	NA
REACTOME_DOUBLE_STRAND_BREAK_REPAIR	REACTOME_DOUBLE_STRAND_BREAK_REPAIR		22	-0.403104	-1.0881	0.333333	0.556074	1	3429	tags=41%, list=16%, signal=49%	NA
REACTOME_OPIOID_SIGNALLING	REACTOME_OPIOID_SIGNALLING		77	-0.313	-1.08796	0.338534	0.555182	1	2024	tags=14%, list=9%, signal=16%	NA
REACTOME_MRNA_3_END_PROCESSING	REACTOME_MRNA_3_END_PROCESSING		33	-0.361235	-1.08795	0.340388	0.553936	1	2329	tags=27%, list=11%, signal=31%	NA
PID_UPA_UPAR_PATHWAY	PID_UPA_UPAR_PATHWAY		42	-0.347565	-1.08752	0.346026	0.553669	1	1773	tags=17%, list=8%, signal=18%	NA
PID_IL2_STAT5_PATHWAY	PID_IL2_STAT5_PATHWAY		30	-0.372869	-1.0866	0.344652	0.554275	1	3053	tags=33%, list=14%, signal=39%	NA
REACTOME_L1CAM_INTERACTIONS	REACTOME_L1CAM_INTERACTIONS		83	-0.312165	-1.08508	0.345921	0.556297	1	2364	tags=18%, list=11%, signal=20%	NA
PID_INSULIN_GLUCOSE_PATHWAY	PID_INSULIN_GLUCOSE_PATHWAY		26	-0.373283	-1.08503	0.339837	0.555184	1	2400	tags=19%, list=11%, signal=22%	NA
PID_IL12_2PATHWAY	PID_IL12_2PATHWAY		62	-0.323059	-1.08247	0.319249	0.559377	1	4418	tags=32%, list=20%, signal=40%	NA
PID_ECADHERIN_STABILIZATION_PATHWAY	PID_ECADHERIN_STABILIZATION_PATHWAY		42	-0.346237	-1.07899	0.346218	0.565568	1	3668	tags=36%, list=17%, signal=43%	NA
REACTOME_REGULATION_OF_WATER_BALANCE_BY_RENAL_AQUAPORINS	REACTOME_REGULATION_OF_WATER_BALANCE_BY_RENAL_AQUAPORINS		43	-0.338959	-1.07815	0.357383	0.566114	1	2150	tags=16%, list=10%, signal=18%	NA
REACTOME_INTRINSIC_PATHWAY_FOR_APOPTOSIS	REACTOME_INTRINSIC_PATHWAY_FOR_APOPTOSIS		28	-0.377437	-1.07787	0.352518	0.565467	1	1660	tags=25%, list=8%, signal=27%	NA
REACTOME_PERK_REGULATED_GENE_EXPRESSION	REACTOME_PERK_REGULATED_GENE_EXPRESSION		28	-0.375054	-1.07784	0.360877	0.564281	1	2217	tags=25%, list=10%, signal=28%	NA
BIOCARTA_GATA3_PATHWAY	BIOCARTA_GATA3_PATHWAY		16	-0.418125	-1.07776	0.372913	0.563222	1	2024	tags=25%, list=9%, signal=28%	NA
REACTOME_N_GLYCAN_ANTENNAE_ELONGATION_IN_THE_MEDIAL_TRANS_GOLGI	REACTOME_N_GLYCAN_ANTENNAE_ELONGATION_IN_THE_MEDIAL_TRANS_GOLGI		18	-0.403805	-1.07691	0.338104	0.563792	1	3286	tags=33%, list=15%, signal=39%	NA
PID_ERB_GENOMIC_PATHWAY	PID_ERB_GENOMIC_PATHWAY		15	-0.42593	-1.07595	0.366355	0.564569	1	3135	tags=33%, list=14%, signal=39%	NA
PID_INTEGRIN5_PATHWAY	PID_INTEGRIN5_PATHWAY		17	-0.409409	-1.07501	0.369439	0.565201	1	1773	tags=18%, list=8%, signal=19%	NA
REACTOME_AMINE_COMPOUND_SLC_TRANSPORTERS	REACTOME_AMINE_COMPOUND_SLC_TRANSPORTERS		27	-0.36945	-1.07448	0.360714	0.565072	1	793	tags=7%, list=4%, signal=8%	NA
REACTOME_SIGNALLING_TO_ERKS	REACTOME_SIGNALLING_TO_ERKS		36	-0.34648	-1.0741	0.336788	0.564598	1	3911	tags=36%, list=18%, signal=44%	NA
REACTOME_NUCLEAR_EVENTS_KINASE_AND_TRANSCRIPTION_FACTOR_ACTIVATION	REACTOME_NUCLEAR_EVENTS_KINASE_AND_TRANSCRIPTION_FACTOR_ACTIVATION		24	-0.388796	-1.07386	0.364286	0.563837	1	3786	tags=46%, list=17%, signal=55%	NA
REACTOME_G_ALPHA_Z_SIGNALLING_EVENTS	REACTOME_G_ALPHA_Z_SIGNALLING_EVENTS		44	-0.339088	-1.07314	0.353821	0.564086	1	1790	tags=11%, list=8%, signal=12%	NA
ST_WNT_BETA_CATENIN_PATHWAY	ST_WNT_BETA_CATENIN_PATHWAY		34	-0.358366	-1.07261	0.347899	0.564006	1	2305	tags=24%, list=11%, signal=26%	NA
BIOCARTA_NDKDYNAMIN_PATHWAY	BIOCARTA_NDKDYNAMIN_PATHWAY		18	-0.408529	-1.07233	0.374291	0.563352	1	3815	tags=33%, list=18%, signal=40%	NA
KEGG_MELANOGENESIS	KEGG_MELANOGENESIS		101	-0.298667	-1.07211	0.345272	0.562613	1	2024	tags=15%, list=9%, signal=16%	NA
REACTOME_METABOLISM_OF_POLYAMINES	REACTOME_METABOLISM_OF_POLYAMINES		15	-0.422716	-1.07078	0.380863	0.564207	1	3435	tags=33%, list=16%, signal=40%	NA
PID_PDGFRA_PATHWAY	PID_PDGFRA_PATHWAY		22	-0.392004	-1.07028	0.400697	0.564047	1	3593	tags=41%, list=17%, signal=49%	NA
REACTOME_POST_NMDA_RECEPTOR_ACTIVATION_EVENTS	REACTOME_POST_NMDA_RECEPTOR_ACTIVATION_EVENTS		32	-0.358914	-1.0695	0.340171	0.564445	1	2024	tags=22%, list=9%, signal=24%	NA
REACTOME_SIGNALING_BY_ILS	REACTOME_SIGNALING_BY_ILS		106	-0.29187	-1.06898	0.328169	0.564364	1	3170	tags=30%, list=15%, signal=35%	NA
PID_WNT_NONCANONICAL_PATHWAY	PID_WNT_NONCANONICAL_PATHWAY		32	-0.35942	-1.06876	0.369492	0.563625	1	2375	tags=25%, list=11%, signal=28%	NA
REACTOME_SIGNALING_BY_FGFR_IN_DISEASE	REACTOME_SIGNALING_BY_FGFR_IN_DISEASE		122	-0.283821	-1.06777	0.323404	0.564597	1	3976	tags=31%, list=18%, signal=38%	NA
BIOCARTA_AT1R_PATHWAY	BIOCARTA_AT1R_PATHWAY		33	-0.355171	-1.06639	0.377517	0.566296	1	3491	tags=33%, list=16%, signal=40%	NA
PID_KIT_PATHWAY	PID_KIT_PATHWAY		52	-0.330761	-1.06559	0.376645	0.566784	1	2955	tags=29%, list=14%, signal=33%	NA
PID_ERBB2_ERBB3_PATHWAY	PID_ERBB2_ERBB3_PATHWAY		44	-0.332353	-1.06519	0.354167	0.56645	1	3491	tags=32%, list=16%, signal=38%	NA
REACTOME_PACKAGING_OF_TELOMERE_ENDS	REACTOME_PACKAGING_OF_TELOMERE_ENDS		47	-0.333864	-1.0634	0.370482	0.569057	1	2661	tags=21%, list=12%, signal=24%	NA
KEGG_STEROID_HORMONE_BIOSYNTHESIS	KEGG_STEROID_HORMONE_BIOSYNTHESIS		54	-0.325879	-1.06279	0.359498	0.569125	1	382	tags=7%, list=2%, signal=8%	NA
KEGG_CYTOSOLIC_DNA_SENSING_PATHWAY	KEGG_CYTOSOLIC_DNA_SENSING_PATHWAY		56	-0.324928	-1.06148	0.371654	0.570577	1	1120	tags=14%, list=5%, signal=15%	NA
BIOCARTA_MPR_PATHWAY	BIOCARTA_MPR_PATHWAY		34	-0.351591	-1.06143	0.361111	0.569485	1	2525	tags=24%, list=12%, signal=27%	NA
PID_SHP2_PATHWAY	PID_SHP2_PATHWAY		58	-0.317165	-1.0594	0.378205	0.57245	1	4553	tags=40%, list=21%, signal=50%	NA
KEGG_BETA_ALANINE_METABOLISM	KEGG_BETA_ALANINE_METABOLISM		22	-0.38169	-1.05405	0.373665	0.582283	1	3517	tags=32%, list=16%, signal=38%	NA
REACTOME_NUCLEOTIDE_BINDING_DOMAIN_LEUCINE_RICH_REPEAT_CONTAINING_RECEPTOR_NLR_SIGNALING_PATHWAYS	REACTOME_NUCLEOTIDE_BINDING_DOMAIN_LEUCINE_RICH_REPEAT_CONTAINING_RECEPTOR_NLR_SIGNALING_PATHWAYS		45	-0.326242	-1.05388	0.378688	0.581413	1	2375	tags=29%, list=11%, signal=32%	NA
NABA_COLLAGENS	NABA_COLLAGENS		44	-0.333729	-1.05305	0.355155	0.581933	1	16	tags=2%, list=0%, signal=2%	NA
BIOCARTA_IL7_PATHWAY	BIOCARTA_IL7_PATHWAY		17	-0.39859	-1.0495	0.409556	0.588474	1	1513	tags=29%, list=7%, signal=32%	NA
REACTOME_COMPLEMENT_CASCADE	REACTOME_COMPLEMENT_CASCADE		29	-0.361641	-1.04877	0.412297	0.588788	1	3824	tags=21%, list=18%, signal=25%	NA
REACTOME_NUCLEOTIDE_LIKE_PURINERGIC_RECEPTORS	REACTOME_NUCLEOTIDE_LIKE_PURINERGIC_RECEPTORS		16	-0.41499	-1.04771	0.38175	0.58986	1	615	tags=13%, list=3%, signal=13%	NA
PID_ECADHERIN_KERATINOCYTE_PATHWAY	PID_ECADHERIN_KERATINOCYTE_PATHWAY		20	-0.391277	-1.0475	0.386139	0.589106	1	1969	tags=25%, list=9%, signal=27%	NA
REACTOME_DIABETES_PATHWAYS	REACTOME_DIABETES_PATHWAYS		130	-0.277225	-1.04684	0.373219	0.58926	1	3887	tags=29%, list=18%, signal=35%	NA
PID_E2F_PATHWAY	PID_E2F_PATHWAY		74	-0.299414	-1.04638	0.378299	0.589014	1	2867	tags=24%, list=13%, signal=28%	NA
BIOCARTA_P53_PATHWAY	BIOCARTA_P53_PATHWAY		16	-0.413164	-1.04602	0.40942	0.588535	1	1042	tags=31%, list=5%, signal=33%	NA
REACTOME_PLC_BETA_MEDIATED_EVENTS	REACTOME_PLC_BETA_MEDIATED_EVENTS		42	-0.332891	-1.04497	0.398026	0.58961	1	2024	tags=21%, list=9%, signal=24%	NA
REACTOME_AQUAPORIN_MEDIATED_TRANSPORT	REACTOME_AQUAPORIN_MEDIATED_TRANSPORT		50	-0.319015	-1.04234	0.38715	0.59393	1	2150	tags=14%, list=10%, signal=16%	NA
BIOCARTA_TCR_PATHWAY	BIOCARTA_TCR_PATHWAY		44	-0.326512	-1.04089	0.389968	0.59568	1	3491	tags=27%, list=16%, signal=32%	NA
KEGG_AMINO_SUGAR_AND_NUCLEOTIDE_SUGAR_METABOLISM	KEGG_AMINO_SUGAR_AND_NUCLEOTIDE_SUGAR_METABOLISM		44	-0.325252	-1.03989	0.389886	0.596574	1	2820	tags=25%, list=13%, signal=29%	NA
PID_CMYB_PATHWAY	PID_CMYB_PATHWAY		84	-0.296438	-1.03862	0.386364	0.597955	1	2574	tags=20%, list=12%, signal=23%	NA
REACTOME_TRANSPORT_OF_MATURE_TRANSCRIPT_TO_CYTOPLASM	REACTOME_TRANSPORT_OF_MATURE_TRANSCRIPT_TO_CYTOPLASM		52	-0.318865	-1.03751	0.401884	0.599177	1	3051	tags=33%, list=14%, signal=38%	NA
REACTOME_SIGNALING_BY_NOTCH1	REACTOME_SIGNALING_BY_NOTCH1		68	-0.297027	-1.03682	0.400307	0.599418	1	3233	tags=29%, list=15%, signal=34%	NA
PID_PI3K_PLC_TRK_PATHWAY	PID_PI3K_PLC_TRK_PATHWAY		36	-0.33934	-1.03594	0.389803	0.600091	1	3930	tags=36%, list=18%, signal=44%	NA
BIOCARTA_NO2IL12_PATHWAY	BIOCARTA_NO2IL12_PATHWAY		17	-0.400105	-1.03137	0.433086	0.608519	1	860	tags=12%, list=4%, signal=12%	NA
KEGG_BIOSYNTHESIS_OF_UNSATURATED_FATTY_ACIDS	KEGG_BIOSYNTHESIS_OF_UNSATURATED_FATTY_ACIDS		22	-0.373825	-1.02838	0.417563	0.613676	1	3484	tags=41%, list=16%, signal=49%	NA
BIOCARTA_ALK_PATHWAY	BIOCARTA_ALK_PATHWAY		37	-0.335733	-1.02825	0.421311	0.612735	1	3061	tags=30%, list=14%, signal=35%	NA
BIOCARTA_RHO_PATHWAY	BIOCARTA_RHO_PATHWAY		32	-0.34381	-1.02812	0.426175	0.611771	1	4061	tags=44%, list=19%, signal=54%	NA
REACTOME_GABA_RECEPTOR_ACTIVATION	REACTOME_GABA_RECEPTOR_ACTIVATION		52	-0.319343	-1.02756	0.417445	0.611704	1	8	tags=2%, list=0%, signal=2%	NA
PID_NOTCH_PATHWAY	PID_NOTCH_PATHWAY		59	-0.307411	-1.02732	0.409366	0.610982	1	3233	tags=29%, list=15%, signal=34%	NA
REACTOME_SIGNALING_BY_GPCR	REACTOME_SIGNALING_BY_GPCR		888	-0.232678	-1.02707	0.407757	0.610332	1	2030	tags=7%, list=9%, signal=8%	NA
REACTOME_G_ALPHA_S_SIGNALLING_EVENTS	REACTOME_G_ALPHA_S_SIGNALLING_EVENTS		120	-0.273884	-1.02505	0.424419	0.613378	1	1790	tags=8%, list=8%, signal=9%	NA
KEGG_TERPENOID_BACKBONE_BIOSYNTHESIS	KEGG_TERPENOID_BACKBONE_BIOSYNTHESIS		15	-0.405413	-1.02482	0.430427	0.612673	1	3402	tags=33%, list=16%, signal=40%	NA
REACTOME_ACTIVATION_OF_NMDA_RECEPTOR_UPON_GLUTAMATE_BINDING_AND_POSTSYNAPTIC_EVENTS	REACTOME_ACTIVATION_OF_NMDA_RECEPTOR_UPON_GLUTAMATE_BINDING_AND_POSTSYNAPTIC_EVENTS		36	-0.33841	-1.02455	0.425497	0.612061	1	2024	tags=19%, list=9%, signal=21%	NA
REACTOME_P130CAS_LINKAGE_TO_MAPK_SIGNALING_FOR_INTEGRINS	REACTOME_P130CAS_LINKAGE_TO_MAPK_SIGNALING_FOR_INTEGRINS		15	-0.415702	-1.02438	0.436697	0.611202	1	2123	tags=27%, list=10%, signal=30%	NA
REACTOME_SYNTHESIS_AND_INTERCONVERSION_OF_NUCLEOTIDE_DI_AND_TRIPHOSPHATES	REACTOME_SYNTHESIS_AND_INTERCONVERSION_OF_NUCLEOTIDE_DI_AND_TRIPHOSPHATES		18	-0.397304	-1.02408	0.399651	0.610641	1	1987	tags=28%, list=9%, signal=31%	NA
PID_LKB1_PATHWAY	PID_LKB1_PATHWAY		47	-0.313759	-1.0196	0.420455	0.618672	1	2572	tags=26%, list=12%, signal=29%	NA
PID_NFKAPPAB_ATYPICAL_PATHWAY	PID_NFKAPPAB_ATYPICAL_PATHWAY		17	-0.400429	-1.01848	0.435626	0.619794	1	1756	tags=24%, list=8%, signal=26%	NA
REACTOME_GLUCOSE_METABOLISM	REACTOME_GLUCOSE_METABOLISM		64	-0.301959	-1.01833	0.415038	0.618848	1	3556	tags=25%, list=16%, signal=30%	NA
REACTOME_SIGNALING_BY_FGFR_MUTANTS	REACTOME_SIGNALING_BY_FGFR_MUTANTS		43	-0.317472	-1.01833	0.416667	0.617642	1	4828	tags=42%, list=22%, signal=54%	NA
REACTOME_PI_3K_CASCADE	REACTOME_PI_3K_CASCADE		54	-0.31178	-1.01782	0.422777	0.617519	1	1797	tags=19%, list=8%, signal=20%	NA
KEGG_TYPE_I_DIABETES_MELLITUS	KEGG_TYPE_I_DIABETES_MELLITUS		40	-0.322096	-1.01772	0.420792	0.61654	1	3682	tags=30%, list=17%, signal=36%	NA
BIOCARTA_FCER1_PATHWAY	BIOCARTA_FCER1_PATHWAY		38	-0.325607	-1.01615	0.420608	0.618648	1	3491	tags=34%, list=16%, signal=41%	NA
REACTOME_GLYCEROPHOSPHOLIPID_BIOSYNTHESIS	REACTOME_GLYCEROPHOSPHOLIPID_BIOSYNTHESIS		82	-0.286655	-1.01424	0.434783	0.62144	1	5416	tags=41%, list=25%, signal=55%	NA
REACTOME_ACTIVATION_OF_CHAPERONE_GENES_BY_XBP1S	REACTOME_ACTIVATION_OF_CHAPERONE_GENES_BY_XBP1S		46	-0.317065	-1.01388	0.404605	0.620981	1	3107	tags=30%, list=14%, signal=35%	NA
BIOCARTA_INTRINSIC_PATHWAY	BIOCARTA_INTRINSIC_PATHWAY		23	-0.369752	-1.01377	0.459707	0.620027	1	6162	tags=48%, list=28%, signal=67%	NA
REACTOME_ER_PHAGOSOME_PATHWAY	REACTOME_ER_PHAGOSOME_PATHWAY		57	-0.30374	-1.01365	0.421227	0.619087	1	3625	tags=32%, list=17%, signal=38%	NA
REACTOME_PRE_NOTCH_EXPRESSION_AND_PROCESSING	REACTOME_PRE_NOTCH_EXPRESSION_AND_PROCESSING		38	-0.32334	-1.01317	0.428571	0.618932	1	3432	tags=34%, list=16%, signal=41%	NA
REACTOME_YAP1_AND_WWTR1_TAZ_STIMULATED_GENE_EXPRESSION	REACTOME_YAP1_AND_WWTR1_TAZ_STIMULATED_GENE_EXPRESSION		23	-0.363623	-1.0129	0.433892	0.618282	1	2714	tags=35%, list=13%, signal=40%	NA
KEGG_ADIPOCYTOKINE_SIGNALING_PATHWAY	KEGG_ADIPOCYTOKINE_SIGNALING_PATHWAY		67	-0.297826	-1.01211	0.431111	0.618687	1	3491	tags=28%, list=16%, signal=34%	NA
BIOCARTA_NKCELLS_PATHWAY	BIOCARTA_NKCELLS_PATHWAY		20	-0.380077	-1.01096	0.452206	0.619898	1	1940	tags=30%, list=9%, signal=33%	NA
ST_JNK_MAPK_PATHWAY	ST_JNK_MAPK_PATHWAY		39	-0.323542	-1.00791	0.443333	0.625373	1	4319	tags=38%, list=20%, signal=48%	NA
BIOCARTA_NTHI_PATHWAY	BIOCARTA_NTHI_PATHWAY		24	-0.354265	-1.00543	0.418605	0.629476	1	2261	tags=38%, list=10%, signal=42%	NA
BIOCARTA_AKT_PATHWAY	BIOCARTA_AKT_PATHWAY		22	-0.3643	-1.00516	0.432282	0.628843	1	1513	tags=18%, list=7%, signal=20%	NA
BIOCARTA_G2_PATHWAY	BIOCARTA_G2_PATHWAY		24	-0.362483	-1.00309	0.45735	0.631909	1	1930	tags=25%, list=9%, signal=27%	NA
SIG_PIP3_SIGNALING_IN_CARDIAC_MYOCTES	SIG_PIP3_SIGNALING_IN_CARDIAC_MYOCTES		67	-0.297426	-1.00255	0.441412	0.631892	1	4628	tags=37%, list=21%, signal=47%	NA
KEGG_RIG_I_LIKE_RECEPTOR_SIGNALING_PATHWAY	KEGG_RIG_I_LIKE_RECEPTOR_SIGNALING_PATHWAY		71	-0.297783	-1.0018	0.452033	0.63225	1	3491	tags=23%, list=16%, signal=27%	NA
PID_AJDISS_2PATHWAY	PID_AJDISS_2PATHWAY		48	-0.313413	-1.00095	0.462145	0.632909	1	4363	tags=31%, list=20%, signal=39%	NA
REACTOME_TCA_CYCLE_AND_RESPIRATORY_ELECTRON_TRANSPORT	REACTOME_TCA_CYCLE_AND_RESPIRATORY_ELECTRON_TRANSPORT		115	-0.267159	-1.00046	0.452174	0.632765	1	5034	tags=31%, list=23%, signal=41%	NA
PID_HDAC_CLASSII_PATHWAY	PID_HDAC_CLASSII_PATHWAY		34	-0.334691	-0.999446	0.447552	0.633666	1	1764	tags=18%, list=8%, signal=19%	NA
BIOCARTA_HER2_PATHWAY	BIOCARTA_HER2_PATHWAY		22	-0.365418	-0.998257	0.481675	0.634869	1	2509	tags=32%, list=12%, signal=36%	NA
REACTOME_INSULIN_RECEPTOR_RECYCLING	REACTOME_INSULIN_RECEPTOR_RECYCLING		23	-0.362845	-0.997946	0.454713	0.634281	1	4589	tags=35%, list=21%, signal=44%	NA
REACTOME_SIGNAL_TRANSDUCTION_BY_L1	REACTOME_SIGNAL_TRANSDUCTION_BY_L1		34	-0.325787	-0.996027	0.465157	0.637139	1	1889	tags=21%, list=9%, signal=23%	NA
KEGG_BASAL_TRANSCRIPTION_FACTORS	KEGG_BASAL_TRANSCRIPTION_FACTORS		35	-0.332106	-0.99544	0.446055	0.63708	1	2490	tags=20%, list=11%, signal=23%	NA
REACTOME_PIP3_ACTIVATES_AKT_SIGNALING	REACTOME_PIP3_ACTIVATES_AKT_SIGNALING		27	-0.349752	-0.993868	0.464419	0.639153	1	1797	tags=26%, list=8%, signal=28%	NA
BIOCARTA_RAC1_PATHWAY	BIOCARTA_RAC1_PATHWAY		23	-0.358742	-0.993761	0.468694	0.638209	1	3144	tags=26%, list=15%, signal=30%	NA
BIOCARTA_CSK_PATHWAY	BIOCARTA_CSK_PATHWAY		21	-0.356704	-0.993073	0.453571	0.638451	1	2024	tags=19%, list=9%, signal=21%	NA
KEGG_RNA_DEGRADATION	KEGG_RNA_DEGRADATION		57	-0.296189	-0.993072	0.469484	0.637273	1	3829	tags=33%, list=18%, signal=40%	NA
REACTOME_ENERGY_DEPENDENT_REGULATION_OF_MTOR_BY_LKB1_AMPK	REACTOME_ENERGY_DEPENDENT_REGULATION_OF_MTOR_BY_LKB1_AMPK		17	-0.38015	-0.991684	0.463768	0.638965	1	4922	tags=47%, list=23%, signal=61%	NA
PID_AR_TF_PATHWAY	PID_AR_TF_PATHWAY		53	-0.303937	-0.990954	0.462963	0.639436	1	3627	tags=38%, list=17%, signal=45%	NA
BIOCARTA_GPCR_PATHWAY	BIOCARTA_GPCR_PATHWAY		34	-0.323502	-0.990632	0.473422	0.638922	1	2024	tags=21%, list=9%, signal=23%	NA
KEGG_NOTCH_SIGNALING_PATHWAY	KEGG_NOTCH_SIGNALING_PATHWAY		47	-0.309265	-0.990106	0.46519	0.638857	1	2574	tags=26%, list=12%, signal=29%	NA
REACTOME_TRANSPORT_OF_MATURE_MRNA_DERIVED_FROM_AN_INTRONLESS_TRANSCRIPT	REACTOME_TRANSPORT_OF_MATURE_MRNA_DERIVED_FROM_AN_INTRONLESS_TRANSCRIPT		32	-0.330765	-0.989651	0.471601	0.638564	1	3051	tags=38%, list=14%, signal=44%	NA
REACTOME_GPCR_DOWNSTREAM_SIGNALING	REACTOME_GPCR_DOWNSTREAM_SIGNALING		782	-0.22617	-0.989487	0.504918	0.637754	1	1797	tags=6%, list=8%, signal=7%	NA
KEGG_T_CELL_RECEPTOR_SIGNALING_PATHWAY	KEGG_T_CELL_RECEPTOR_SIGNALING_PATHWAY		107	-0.268635	-0.989302	0.490455	0.636974	1	2507	tags=20%, list=12%, signal=22%	NA
REACTOME_GLUTAMATE_NEUROTRANSMITTER_RELEASE_CYCLE	REACTOME_GLUTAMATE_NEUROTRANSMITTER_RELEASE_CYCLE		15	-0.398454	-0.989038	0.470363	0.636339	1	565	tags=13%, list=3%, signal=14%	NA
REACTOME_TGF_BETA_RECEPTOR_SIGNALING_ACTIVATES_SMADS	REACTOME_TGF_BETA_RECEPTOR_SIGNALING_ACTIVATES_SMADS		24	-0.348357	-0.98811	0.46337	0.637085	1	3508	tags=38%, list=16%, signal=45%	NA
KEGG_PHENYLALANINE_METABOLISM	KEGG_PHENYLALANINE_METABOLISM		18	-0.383611	-0.988062	0.492982	0.636038	1	47	tags=6%, list=0%, signal=6%	NA
BIOCARTA_IL12_PATHWAY	BIOCARTA_IL12_PATHWAY		21	-0.362788	-0.987408	0.466292	0.636307	1	1756	tags=19%, list=8%, signal=21%	NA
PID_NEPHRIN_NEPH1_PATHWAY	PID_NEPHRIN_NEPH1_PATHWAY		31	-0.337502	-0.986537	0.489655	0.636953	1	2793	tags=26%, list=13%, signal=30%	NA
REACTOME_SIGNALING_BY_THE_B_CELL_RECEPTOR_BCR	REACTOME_SIGNALING_BY_THE_B_CELL_RECEPTOR_BCR		120	-0.263518	-0.985878	0.479315	0.637219	1	3960	tags=29%, list=18%, signal=35%	NA
REACTOME_SEMA4D_IN_SEMAPHORIN_SIGNALING	REACTOME_SEMA4D_IN_SEMAPHORIN_SIGNALING		31	-0.34088	-0.985867	0.46587	0.636092	1	6074	tags=58%, list=28%, signal=81%	NA
PID_P38_MKK3_6PATHWAY	PID_P38_MKK3_6PATHWAY		26	-0.353756	-0.985631	0.47027	0.63545	1	3144	tags=35%, list=15%, signal=40%	NA
BIOCARTA_ERK_PATHWAY	BIOCARTA_ERK_PATHWAY		28	-0.341641	-0.984741	0.479475	0.636188	1	4534	tags=39%, list=21%, signal=50%	NA
REACTOME_DEPOSITION_OF_NEW_CENPA_CONTAINING_NUCLEOSOMES_AT_THE_CENTROMERE	REACTOME_DEPOSITION_OF_NEW_CENPA_CONTAINING_NUCLEOSOMES_AT_THE_CENTROMERE		62	-0.294439	-0.984703	0.4784	0.635121	1	2967	tags=21%, list=14%, signal=24%	NA
KEGG_PARKINSONS_DISEASE	KEGG_PARKINSONS_DISEASE		112	-0.267126	-0.982031	0.482117	0.639658	1	4978	tags=27%, list=23%, signal=35%	NA
KEGG_TRYPTOPHAN_METABOLISM	KEGG_TRYPTOPHAN_METABOLISM		39	-0.315031	-0.979055	0.483607	0.644575	1	3186	tags=21%, list=15%, signal=24%	NA
REACTOME_ACTIVATION_OF_GENES_BY_ATF4	REACTOME_ACTIVATION_OF_GENES_BY_ATF4		25	-0.345859	-0.978269	0.498252	0.64505	1	1919	tags=20%, list=9%, signal=22%	NA
REACTOME_TRIF_MEDIATED_TLR3_SIGNALING	REACTOME_TRIF_MEDIATED_TLR3_SIGNALING		72	-0.277817	-0.975574	0.468019	0.649539	1	3177	tags=29%, list=15%, signal=34%	NA
REACTOME_INTEGRIN_ALPHAIIB_BETA3_SIGNALING	REACTOME_INTEGRIN_ALPHAIIB_BETA3_SIGNALING		27	-0.339489	-0.974917	0.475352	0.649714	1	2509	tags=22%, list=12%, signal=25%	NA
REACTOME_MEIOSIS	REACTOME_MEIOSIS		110	-0.261784	-0.973967	0.508148	0.650593	1	3155	tags=20%, list=15%, signal=23%	NA
REACTOME_CIRCADIAN_REPRESSION_OF_EXPRESSION_BY_REV_ERBA	REACTOME_CIRCADIAN_REPRESSION_OF_EXPRESSION_BY_REV_ERBA		22	-0.35237	-0.973928	0.494078	0.649498	1	2714	tags=36%, list=13%, signal=42%	NA
PID_NCADHERIN_PATHWAY	PID_NCADHERIN_PATHWAY		33	-0.320628	-0.969211	0.480672	0.657979	1	3561	tags=33%, list=16%, signal=40%	NA
PID_CDC42_REG_PATHWAY	PID_CDC42_REG_PATHWAY		30	-0.327227	-0.968539	0.498328	0.658215	1	2030	tags=17%, list=9%, signal=18%	NA
REACTOME_SIGNALING_BY_INSULIN_RECEPTOR	REACTOME_SIGNALING_BY_INSULIN_RECEPTOR		105	-0.264058	-0.965712	0.531387	0.662816	1	4589	tags=35%, list=21%, signal=44%	NA
KEGG_ALLOGRAFT_REJECTION	KEGG_ALLOGRAFT_REJECTION		34	-0.318959	-0.964385	0.486799	0.664308	1	3682	tags=29%, list=17%, signal=35%	NA
KEGG_GRAFT_VERSUS_HOST_DISEASE	KEGG_GRAFT_VERSUS_HOST_DISEASE		36	-0.314263	-0.963957	0.491438	0.663953	1	3682	tags=28%, list=17%, signal=33%	NA
REACTOME_REGULATION_OF_APOPTOSIS	REACTOME_REGULATION_OF_APOPTOSIS		55	-0.286554	-0.963364	0.519231	0.663948	1	3625	tags=29%, list=17%, signal=35%	NA
REACTOME_GAP_JUNCTION_ASSEMBLY	REACTOME_GAP_JUNCTION_ASSEMBLY		18	-0.368644	-0.963212	0.481482	0.663087	1	2000	tags=11%, list=9%, signal=12%	NA
KEGG_ADHERENS_JUNCTION	KEGG_ADHERENS_JUNCTION		73	-0.275223	-0.963175	0.503771	0.662003	1	3975	tags=30%, list=18%, signal=37%	NA
KEGG_GLYCOSPHINGOLIPID_BIOSYNTHESIS_LACTO_AND_NEOLACTO_SERIES	KEGG_GLYCOSPHINGOLIPID_BIOSYNTHESIS_LACTO_AND_NEOLACTO_SERIES		26	-0.334553	-0.962586	0.47619	0.662091	1	1474	tags=15%, list=7%, signal=16%	NA
REACTOME_NEURONAL_SYSTEM	REACTOME_NEURONAL_SYSTEM		275	-0.233731	-0.96172	0.565432	0.662812	1	2043	tags=9%, list=9%, signal=10%	NA
BIOCARTA_NOS1_PATHWAY	BIOCARTA_NOS1_PATHWAY		20	-0.353624	-0.961423	0.499139	0.662279	1	245	tags=10%, list=1%, signal=10%	NA
BIOCARTA_RAS_PATHWAY	BIOCARTA_RAS_PATHWAY		23	-0.345633	-0.960431	0.505556	0.663275	1	1969	tags=22%, list=9%, signal=24%	NA
REACTOME_SIGNALING_BY_FGFR	REACTOME_SIGNALING_BY_FGFR		108	-0.261929	-0.960429	0.533824	0.662129	1	3976	tags=28%, list=18%, signal=34%	NA
PID_ILK_PATHWAY	PID_ILK_PATHWAY		45	-0.30479	-0.959749	0.513333	0.662345	1	3076	tags=31%, list=14%, signal=36%	NA
PID_MTOR_4PATHWAY	PID_MTOR_4PATHWAY		69	-0.279682	-0.958668	0.522796	0.663456	1	4553	tags=43%, list=21%, signal=55%	NA
REACTOME_MAPK_TARGETS_NUCLEAR_EVENTS_MEDIATED_BY_MAP_KINASES	REACTOME_MAPK_TARGETS_NUCLEAR_EVENTS_MEDIATED_BY_MAP_KINASES		30	-0.330976	-0.957341	0.523888	0.665109	1	3786	tags=43%, list=17%, signal=52%	NA
ST_B_CELL_ANTIGEN_RECEPTOR	ST_B_CELL_ANTIGEN_RECEPTOR		40	-0.303135	-0.956905	0.507463	0.664867	1	2509	tags=25%, list=12%, signal=28%	NA
BIOCARTA_ACH_PATHWAY	BIOCARTA_ACH_PATHWAY		16	-0.372694	-0.955509	0.516637	0.666551	1	1513	tags=19%, list=7%, signal=20%	NA
REACTOME_GROWTH_HORMONE_RECEPTOR_SIGNALING	REACTOME_GROWTH_HORMONE_RECEPTOR_SIGNALING		24	-0.334206	-0.952681	0.504274	0.671205	1	5163	tags=54%, list=24%, signal=71%	NA
REACTOME_CD28_DEPENDENT_PI3K_AKT_SIGNALING	REACTOME_CD28_DEPENDENT_PI3K_AKT_SIGNALING		21	-0.346361	-0.952523	0.507042	0.670398	1	1797	tags=24%, list=8%, signal=26%	NA
PID_MET_PATHWAY	PID_MET_PATHWAY		80	-0.272001	-0.95242	0.549483	0.669435	1	3653	tags=33%, list=17%, signal=39%	NA
REACTOME_ACYL_CHAIN_REMODELLING_OF_PI	REACTOME_ACYL_CHAIN_REMODELLING_OF_PI		15	-0.372638	-0.951719	0.498162	0.669781	1	5416	tags=47%, list=25%, signal=62%	NA
REACTOME_ACYL_CHAIN_REMODELLING_OF_PE	REACTOME_ACYL_CHAIN_REMODELLING_OF_PE		21	-0.345563	-0.948699	0.528399	0.674736	1	5977	tags=48%, list=28%, signal=66%	NA
KEGG_FRUCTOSE_AND_MANNOSE_METABOLISM	KEGG_FRUCTOSE_AND_MANNOSE_METABOLISM		33	-0.316096	-0.948689	0.499139	0.673614	1	2368	tags=21%, list=11%, signal=24%	NA
KEGG_MAPK_SIGNALING_PATHWAY	KEGG_MAPK_SIGNALING_PATHWAY		265	-0.228246	-0.946843	0.583333	0.676103	1	3230	tags=20%, list=15%, signal=24%	NA
REACTOME_DOWNREGULATION_OF_TGF_BETA_RECEPTOR_SIGNALING	REACTOME_DOWNREGULATION_OF_TGF_BETA_RECEPTOR_SIGNALING		21	-0.350553	-0.946659	0.524207	0.675387	1	3508	tags=38%, list=16%, signal=45%	NA
REACTOME_TRAF6_MEDIATED_INDUCTION_OF_NFKB_AND_MAP_KINASES_UPON_TLR7_8_OR_9_ACTIVATION	REACTOME_TRAF6_MEDIATED_INDUCTION_OF_NFKB_AND_MAP_KINASES_UPON_TLR7_8_OR_9_ACTIVATION		75	-0.275845	-0.944122	0.538217	0.679414	1	3859	tags=36%, list=18%, signal=44%	NA
PID_AURORA_A_PATHWAY	PID_AURORA_A_PATHWAY		30	-0.322876	-0.943878	0.523894	0.678778	1	489	tags=10%, list=2%, signal=10%	NA
HALLMARK_APICAL_JUNCTION	HALLMARK_APICAL_JUNCTION		198	-0.239077	-0.942291	0.594262	0.680742	1	2682	tags=15%, list=12%, signal=17%	NA
REACTOME_RESPIRATORY_ELECTRON_TRANSPORT_ATP_SYNTHESIS_BY_CHEMIOSMOTIC_COUPLING_AND_HEAT_PRODUCTION_BY_UNCOUPLING_PROTEINS_	REACTOME_RESPIRATORY_ELECTRON_TRANSPORT_ATP_SYNTHESIS_BY_CHEMIOSMOTIC_COUPLING_AND_HEAT_PRODUCTION_BY_UNCOUPLING_PROTEINS_		79	-0.268328	-0.941403	0.544765	0.681372	1	6897	tags=48%, list=32%, signal=70%	NA
KEGG_REGULATION_OF_AUTOPHAGY	KEGG_REGULATION_OF_AUTOPHAGY		34	-0.308063	-0.941288	0.504132	0.680451	1	6247	tags=41%, list=29%, signal=58%	NA
PID_IL27_PATHWAY	PID_IL27_PATHWAY		26	-0.328125	-0.940077	0.538462	0.681727	1	1996	tags=23%, list=9%, signal=25%	NA
BIOCARTA_ACTINY_PATHWAY	BIOCARTA_ACTINY_PATHWAY		20	-0.346075	-0.934643	0.519196	0.691412	1	2525	tags=25%, list=12%, signal=28%	NA
REACTOME_KERATAN_SULFATE_BIOSYNTHESIS	REACTOME_KERATAN_SULFATE_BIOSYNTHESIS		26	-0.327993	-0.93298	0.535284	0.693395	1	2844	tags=23%, list=13%, signal=27%	NA
BIOCARTA_G1_PATHWAY	BIOCARTA_G1_PATHWAY		28	-0.318876	-0.93166	0.550802	0.694842	1	2873	tags=29%, list=13%, signal=33%	NA
REACTOME_DOWNSTREAM_SIGNALING_OF_ACTIVATED_FGFR	REACTOME_DOWNSTREAM_SIGNALING_OF_ACTIVATED_FGFR		97	-0.257683	-0.931444	0.566122	0.694104	1	2132	tags=18%, list=10%, signal=19%	NA
KEGG_OXIDATIVE_PHOSPHORYLATION	KEGG_OXIDATIVE_PHOSPHORYLATION		115	-0.249606	-0.92992	0.569801	0.69598	1	5990	tags=34%, list=28%, signal=47%	NA
BIOCARTA_BAD_PATHWAY	BIOCARTA_BAD_PATHWAY		26	-0.327787	-0.929849	0.548822	0.69495	1	2360	tags=27%, list=11%, signal=30%	NA
REACTOME_GLUCOSE_TRANSPORT	REACTOME_GLUCOSE_TRANSPORT		38	-0.307044	-0.929644	0.559524	0.694201	1	3051	tags=32%, list=14%, signal=37%	NA
PID_IL1_PATHWAY	PID_IL1_PATHWAY		34	-0.314463	-0.929316	0.550523	0.693771	1	2469	tags=32%, list=11%, signal=36%	NA
PID_HNF3A_PATHWAY	PID_HNF3A_PATHWAY		44	-0.29373	-0.92849	0.554828	0.694306	1	2330	tags=14%, list=11%, signal=15%	NA
BIOCARTA_TOLL_PATHWAY	BIOCARTA_TOLL_PATHWAY		37	-0.301649	-0.928487	0.525285	0.693166	1	3491	tags=32%, list=16%, signal=39%	NA
REACTOME_ACTIVATED_NOTCH1_TRANSMITS_SIGNAL_TO_THE_NUCLEUS	REACTOME_ACTIVATED_NOTCH1_TRANSMITS_SIGNAL_TO_THE_NUCLEUS		26	-0.324401	-0.928411	0.548161	0.692182	1	3075	tags=31%, list=14%, signal=36%	NA
REACTOME_RORA_ACTIVATES_CIRCADIAN_EXPRESSION	REACTOME_RORA_ACTIVATES_CIRCADIAN_EXPRESSION		23	-0.327638	-0.927966	0.564189	0.691946	1	2714	tags=35%, list=13%, signal=40%	NA
PID_RHOA_REG_PATHWAY	PID_RHOA_REG_PATHWAY		45	-0.292558	-0.924008	0.589527	0.698619	1	4037	tags=29%, list=19%, signal=35%	NA
ST_T_CELL_SIGNAL_TRANSDUCTION	ST_T_CELL_SIGNAL_TRANSDUCTION		45	-0.287642	-0.923445	0.565074	0.698586	1	3403	tags=24%, list=16%, signal=29%	NA
REACTOME_PKA_MEDIATED_PHOSPHORYLATION_OF_CREB	REACTOME_PKA_MEDIATED_PHOSPHORYLATION_OF_CREB		17	-0.355605	-0.921588	0.560748	0.701078	1	2024	tags=29%, list=9%, signal=32%	NA
REACTOME_CLASS_B_2_SECRETIN_FAMILY_RECEPTORS	REACTOME_CLASS_B_2_SECRETIN_FAMILY_RECEPTORS		87	-0.25791	-0.920864	0.58858	0.701339	1	160	tags=2%, list=1%, signal=2%	NA
PID_P38_ALPHA_BETA_DOWNSTREAM_PATHWAY	PID_P38_ALPHA_BETA_DOWNSTREAM_PATHWAY		38	-0.295522	-0.919636	0.565891	0.702607	1	3887	tags=37%, list=18%, signal=45%	NA
REACTOME_CD28_CO_STIMULATION	REACTOME_CD28_CO_STIMULATION		31	-0.316943	-0.917957	0.576988	0.704663	1	1797	tags=19%, list=8%, signal=21%	NA
REACTOME_CA_DEPENDENT_EVENTS	REACTOME_CA_DEPENDENT_EVENTS		29	-0.321516	-0.917928	0.578073	0.703561	1	2024	tags=24%, list=9%, signal=27%	NA
REACTOME_NOD1_2_SIGNALING_PATHWAY	REACTOME_NOD1_2_SIGNALING_PATHWAY		30	-0.313872	-0.917715	0.56734	0.702849	1	2375	tags=27%, list=11%, signal=30%	NA
KEGG_N_GLYCAN_BIOSYNTHESIS	KEGG_N_GLYCAN_BIOSYNTHESIS		46	-0.287325	-0.91462	0.575851	0.707867	1	1343	tags=11%, list=6%, signal=12%	NA
REACTOME_CLEAVAGE_OF_GROWING_TRANSCRIPT_IN_THE_TERMINATION_REGION_	REACTOME_CLEAVAGE_OF_GROWING_TRANSCRIPT_IN_THE_TERMINATION_REGION_		42	-0.290718	-0.912259	0.574539	0.711431	1	2329	tags=21%, list=11%, signal=24%	NA
REACTOME_MEIOTIC_RECOMBINATION	REACTOME_MEIOTIC_RECOMBINATION		82	-0.257605	-0.911999	0.593558	0.710781	1	2661	tags=16%, list=12%, signal=18%	NA
REACTOME_NEP_NS2_INTERACTS_WITH_THE_CELLULAR_EXPORT_MACHINERY	REACTOME_NEP_NS2_INTERACTS_WITH_THE_CELLULAR_EXPORT_MACHINERY		27	-0.319113	-0.91057	0.564374	0.712468	1	3051	tags=37%, list=14%, signal=43%	NA
BIOCARTA_STATHMIN_PATHWAY	BIOCARTA_STATHMIN_PATHWAY		19	-0.336297	-0.910403	0.558659	0.711632	1	2024	tags=16%, list=9%, signal=17%	NA
REACTOME_PURINE_METABOLISM	REACTOME_PURINE_METABOLISM		33	-0.304306	-0.908651	0.561139	0.713926	1	1408	tags=15%, list=7%, signal=16%	NA
BIOCARTA_ARAP_PATHWAY	BIOCARTA_ARAP_PATHWAY		17	-0.350353	-0.907479	0.587302	0.715072	1	3943	tags=35%, list=18%, signal=43%	NA
REACTOME_TRAFFICKING_OF_GLUR2_CONTAINING_AMPA_RECEPTORS	REACTOME_TRAFFICKING_OF_GLUR2_CONTAINING_AMPA_RECEPTORS		15	-0.36463	-0.904543	0.576512	0.719494	1	1270	tags=13%, list=6%, signal=14%	NA
REACTOME_RNA_POL_I_PROMOTER_OPENING	REACTOME_RNA_POL_I_PROMOTER_OPENING		59	-0.268298	-0.903595	0.634969	0.7203	1	2661	tags=17%, list=12%, signal=19%	NA
REACTOME_SEMA4D_INDUCED_CELL_MIGRATION_AND_GROWTH_CONE_COLLAPSE	REACTOME_SEMA4D_INDUCED_CELL_MIGRATION_AND_GROWTH_CONE_COLLAPSE		26	-0.317278	-0.90311	0.581436	0.720113	1	6074	tags=62%, list=28%, signal=85%	NA
BIOCARTA_COMP_PATHWAY	BIOCARTA_COMP_PATHWAY		19	-0.340718	-0.90227	0.584699	0.720626	1	6358	tags=42%, list=29%, signal=60%	NA
REACTOME_TRANSCRIPTIONAL_REGULATION_OF_WHITE_ADIPOCYTE_DIFFERENTIATION	REACTOME_TRANSCRIPTIONAL_REGULATION_OF_WHITE_ADIPOCYTE_DIFFERENTIATION		71	-0.260942	-0.90204	0.628959	0.719933	1	3376	tags=28%, list=16%, signal=33%	NA
KEGG_RIBOFLAVIN_METABOLISM	KEGG_RIBOFLAVIN_METABOLISM		16	-0.357444	-0.900929	0.596396	0.720908	1	5350	tags=38%, list=25%, signal=50%	NA
REACTOME_NOTCH1_INTRACELLULAR_DOMAIN_REGULATES_TRANSCRIPTION	REACTOME_NOTCH1_INTRACELLULAR_DOMAIN_REGULATES_TRANSCRIPTION		44	-0.287472	-0.89932	0.610561	0.722829	1	3233	tags=30%, list=15%, signal=35%	NA
PID_IL2_PI3K_PATHWAY	PID_IL2_PI3K_PATHWAY		34	-0.301106	-0.898982	0.592657	0.722335	1	2718	tags=29%, list=13%, signal=34%	NA
REACTOME_SIGNALING_BY_NODAL	REACTOME_SIGNALING_BY_NODAL		18	-0.340794	-0.894563	0.607527	0.729623	1	3508	tags=22%, list=16%, signal=26%	NA
REACTOME_GAP_JUNCTION_TRAFFICKING	REACTOME_GAP_JUNCTION_TRAFFICKING		27	-0.310147	-0.889462	0.607266	0.738394	1	4814	tags=30%, list=22%, signal=38%	NA
REACTOME_CREB_PHOSPHORYLATION_THROUGH_THE_ACTIVATION_OF_RAS	REACTOME_CREB_PHOSPHORYLATION_THROUGH_THE_ACTIVATION_OF_RAS		26	-0.309887	-0.888244	0.623188	0.739619	1	3930	tags=31%, list=18%, signal=38%	NA
REACTOME_INSULIN_RECEPTOR_SIGNALLING_CASCADE	REACTOME_INSULIN_RECEPTOR_SIGNALLING_CASCADE		84	-0.249445	-0.886417	0.658055	0.74189	1	4567	tags=36%, list=21%, signal=45%	NA
PID_HEDGEHOG_GLI_PATHWAY	PID_HEDGEHOG_GLI_PATHWAY		48	-0.272572	-0.886096	0.636218	0.741311	1	3351	tags=21%, list=15%, signal=25%	NA
REACTOME_PHASE_II_CONJUGATION	REACTOME_PHASE_II_CONJUGATION		68	-0.258399	-0.885878	0.639445	0.740543	1	3074	tags=22%, list=14%, signal=26%	NA
PID_PI3KCI_AKT_PATHWAY	PID_PI3KCI_AKT_PATHWAY		35	-0.291033	-0.885586	0.617504	0.739907	1	4666	tags=46%, list=22%, signal=58%	NA
PID_ENDOTHELIN_PATHWAY	PID_ENDOTHELIN_PATHWAY		63	-0.263959	-0.884512	0.643411	0.740825	1	1969	tags=17%, list=9%, signal=19%	NA
KEGG_GAP_JUNCTION	KEGG_GAP_JUNCTION		90	-0.249974	-0.882374	0.67254	0.743802	1	2132	tags=16%, list=10%, signal=17%	NA
PID_BETA_CATENIN_DEG_PATHWAY	PID_BETA_CATENIN_DEG_PATHWAY		18	-0.337007	-0.876876	0.596085	0.753018	1	4224	tags=39%, list=20%, signal=48%	NA
BIOCARTA_TH1TH2_PATHWAY	BIOCARTA_TH1TH2_PATHWAY		18	-0.337129	-0.876492	0.637993	0.752534	1	6216	tags=50%, list=29%, signal=70%	NA
SIG_REGULATION_OF_THE_ACTIN_CYTOSKELETON_BY_RHO_GTPASES	SIG_REGULATION_OF_THE_ACTIN_CYTOSKELETON_BY_RHO_GTPASES		35	-0.286943	-0.873228	0.652027	0.757493	1	3204	tags=23%, list=15%, signal=27%	NA
REACTOME_DESTABILIZATION_OF_MRNA_BY_BRF1	REACTOME_DESTABILIZATION_OF_MRNA_BY_BRF1		17	-0.343133	-0.873076	0.632224	0.756582	1	1673	tags=24%, list=8%, signal=25%	NA
ST_FAS_SIGNALING_PATHWAY	ST_FAS_SIGNALING_PATHWAY		65	-0.262281	-0.86954	0.66195	0.762146	1	3594	tags=31%, list=17%, signal=37%	NA
KEGG_PORPHYRIN_AND_CHLOROPHYLL_METABOLISM	KEGG_PORPHYRIN_AND_CHLOROPHYLL_METABOLISM		40	-0.280583	-0.867959	0.67121	0.763973	1	1718	tags=13%, list=8%, signal=14%	NA
REACTOME_KINESINS	REACTOME_KINESINS		24	-0.313095	-0.866807	0.633394	0.765016	1	2498	tags=25%, list=12%, signal=28%	NA
REACTOME_SYNTHESIS_SECRETION_AND_INACTIVATION_OF_GLP1	REACTOME_SYNTHESIS_SECRETION_AND_INACTIVATION_OF_GLP1		16	-0.337412	-0.866784	0.609434	0.763883	1	1481	tags=13%, list=7%, signal=13%	NA
REACTOME_ENDOSOMAL_SORTING_COMPLEX_REQUIRED_FOR_TRANSPORT_ESCRT	REACTOME_ENDOSOMAL_SORTING_COMPLEX_REQUIRED_FOR_TRANSPORT_ESCRT		26	-0.303274	-0.865973	0.636986	0.764237	1	4366	tags=35%, list=20%, signal=43%	NA
PID_EPHA2_FWD_PATHWAY	PID_EPHA2_FWD_PATHWAY		19	-0.326795	-0.863745	0.621291	0.767101	1	2927	tags=26%, list=14%, signal=30%	NA
REACTOME_ZINC_TRANSPORTERS	REACTOME_ZINC_TRANSPORTERS		15	-0.334054	-0.862788	0.631676	0.767703	1	3235	tags=33%, list=15%, signal=39%	NA
REACTOME_PROLONGED_ERK_ACTIVATION_EVENTS	REACTOME_PROLONGED_ERK_ACTIVATION_EVENTS		19	-0.324504	-0.861092	0.641248	0.769714	1	4534	tags=42%, list=21%, signal=53%	NA
PID_S1P_S1P1_PATHWAY	PID_S1P_S1P1_PATHWAY		21	-0.316185	-0.860619	0.65942	0.769395	1	3698	tags=33%, list=17%, signal=40%	NA
PID_BARD1_PATHWAY	PID_BARD1_PATHWAY		29	-0.299314	-0.860175	0.648557	0.76908	1	3647	tags=34%, list=17%, signal=41%	NA
KEGG_LYSINE_DEGRADATION	KEGG_LYSINE_DEGRADATION		44	-0.271394	-0.858938	0.673235	0.770176	1	3186	tags=27%, list=15%, signal=32%	NA
REACTOME_RIP_MEDIATED_NFKB_ACTIVATION_VIA_DAI	REACTOME_RIP_MEDIATED_NFKB_ACTIVATION_VIA_DAI		18	-0.328151	-0.85386	0.63864	0.778231	1	1005	tags=17%, list=5%, signal=17%	NA
KEGG_GLUTATHIONE_METABOLISM	KEGG_GLUTATHIONE_METABOLISM		50	-0.263064	-0.846431	0.686985	0.790646	1	2540	tags=16%, list=12%, signal=18%	NA
HALLMARK_BILE_ACID_METABOLISM	HALLMARK_BILE_ACID_METABOLISM		112	-0.22629	-0.842831	0.773256	0.795874	1	3837	tags=23%, list=18%, signal=28%	NA
REACTOME_DEVELOPMENTAL_BIOLOGY	REACTOME_DEVELOPMENTAL_BIOLOGY		386	-0.198784	-0.842816	0.859504	0.794697	1	3619	tags=19%, list=17%, signal=23%	NA
REACTOME_PI3K_CASCADE	REACTOME_PI3K_CASCADE		68	-0.250033	-0.842781	0.714286	0.793567	1	5001	tags=38%, list=23%, signal=50%	NA
REACTOME_ACTIVATED_TAK1_MEDIATES_P38_MAPK_ACTIVATION	REACTOME_ACTIVATED_TAK1_MEDIATES_P38_MAPK_ACTIVATION		17	-0.323188	-0.840901	0.642322	0.795581	1	2375	tags=35%, list=11%, signal=40%	NA
REACTOME_TRANSFERRIN_ENDOCYTOSIS_AND_RECYCLING	REACTOME_TRANSFERRIN_ENDOCYTOSIS_AND_RECYCLING		25	-0.296897	-0.840728	0.679795	0.794655	1	5730	tags=44%, list=26%, signal=60%	NA
REACTOME_RNA_POL_I_TRANSCRIPTION	REACTOME_RNA_POL_I_TRANSCRIPTION		84	-0.23655	-0.839578	0.734633	0.795551	1	2858	tags=18%, list=13%, signal=20%	NA
BIOCARTA_AGR_PATHWAY	BIOCARTA_AGR_PATHWAY		36	-0.276055	-0.83916	0.688189	0.795065	1	3491	tags=22%, list=16%, signal=26%	NA
NABA_CORE_MATRISOME	NABA_CORE_MATRISOME		272	-0.203749	-0.836952	0.831902	0.797893	1	1185	tags=4%, list=5%, signal=4%	NA
REACTOME_DAG_AND_IP3_SIGNALING	REACTOME_DAG_AND_IP3_SIGNALING		31	-0.282864	-0.834842	0.705	0.80061	1	2024	tags=19%, list=9%, signal=21%	NA
REACTOME_SIGNALING_BY_HIPPO	REACTOME_SIGNALING_BY_HIPPO		20	-0.31241	-0.834004	0.666081	0.800924	1	3230	tags=25%, list=15%, signal=29%	NA
BIOCARTA_41BB_PATHWAY	BIOCARTA_41BB_PATHWAY		17	-0.319414	-0.833315	0.665448	0.80093	1	3849	tags=35%, list=18%, signal=43%	NA
NABA_ECM_GLYCOPROTEINS	NABA_ECM_GLYCOPROTEINS		193	-0.212053	-0.832576	0.812582	0.801027	1	1177	tags=5%, list=5%, signal=5%	NA
REACTOME_SYNTHESIS_OF_PC	REACTOME_SYNTHESIS_OF_PC		18	-0.319927	-0.831866	0.698225	0.801107	1	4477	tags=33%, list=21%, signal=42%	NA
REACTOME_ARMS_MEDIATED_ACTIVATION	REACTOME_ARMS_MEDIATED_ACTIVATION		17	-0.327569	-0.831838	0.668498	0.799978	1	3593	tags=35%, list=17%, signal=42%	NA
PID_SYNDECAN_3_PATHWAY	PID_SYNDECAN_3_PATHWAY		17	-0.321936	-0.830151	0.664234	0.801746	1	2909	tags=24%, list=13%, signal=27%	NA
REACTOME_GLUCONEOGENESIS	REACTOME_GLUCONEOGENESIS		32	-0.276179	-0.829682	0.700669	0.801349	1	4399	tags=28%, list=20%, signal=35%	NA
REACTOME_INTRINSIC_PATHWAY	REACTOME_INTRINSIC_PATHWAY		17	-0.312559	-0.829313	0.670841	0.800766	1	392	tags=6%, list=2%, signal=6%	NA
KEGG_PROGESTERONE_MEDIATED_OOCYTE_MATURATION	KEGG_PROGESTERONE_MEDIATED_OOCYTE_MATURATION		85	-0.234394	-0.82558	0.756522	0.806087	1	2360	tags=19%, list=11%, signal=21%	NA
PID_ATF2_PATHWAY	PID_ATF2_PATHWAY		59	-0.248053	-0.823387	0.749623	0.808798	1	1919	tags=17%, list=9%, signal=19%	NA
REACTOME_RECRUITMENT_OF_MITOTIC_CENTROSOME_PROTEINS_AND_COMPLEXES	REACTOME_RECRUITMENT_OF_MITOTIC_CENTROSOME_PROTEINS_AND_COMPLEXES		64	-0.241285	-0.822082	0.753446	0.809842	1	3827	tags=30%, list=18%, signal=36%	NA
REACTOME_CYTOSOLIC_TRNA_AMINOACYLATION	REACTOME_CYTOSOLIC_TRNA_AMINOACYLATION		24	-0.289701	-0.819362	0.697632	0.813155	1	3305	tags=29%, list=15%, signal=34%	NA
REACTOME_CELL_JUNCTION_ORGANIZATION	REACTOME_CELL_JUNCTION_ORGANIZATION		77	-0.232184	-0.817268	0.778963	0.815608	1	2682	tags=14%, list=12%, signal=16%	NA
REACTOME_NEUROTRANSMITTER_RELEASE_CYCLE	REACTOME_NEUROTRANSMITTER_RELEASE_CYCLE		34	-0.276055	-0.81647	0.736409	0.815734	1	793	tags=9%, list=4%, signal=9%	NA
REACTOME_ERK_MAPK_TARGETS	REACTOME_ERK_MAPK_TARGETS		21	-0.30683	-0.816378	0.698413	0.814693	1	3177	tags=33%, list=15%, signal=39%	NA
REACTOME_PLATELET_AGGREGATION_PLUG_FORMATION	REACTOME_PLATELET_AGGREGATION_PLUG_FORMATION		36	-0.269764	-0.816104	0.737201	0.813939	1	2509	tags=17%, list=12%, signal=19%	NA
REACTOME_LOSS_OF_NLP_FROM_MITOTIC_CENTROSOMES	REACTOME_LOSS_OF_NLP_FROM_MITOTIC_CENTROSOMES		57	-0.24981	-0.815912	0.753968	0.813075	1	3827	tags=32%, list=18%, signal=38%	NA
BIOCARTA_CTLA4_PATHWAY	BIOCARTA_CTLA4_PATHWAY		18	-0.317181	-0.814541	0.704225	0.814129	1	2718	tags=17%, list=13%, signal=19%	NA
KEGG_METABOLISM_OF_XENOBIOTICS_BY_CYTOCHROME_P450	KEGG_METABOLISM_OF_XENOBIOTICS_BY_CYTOCHROME_P450		69	-0.235786	-0.81447	0.778788	0.813069	1	2700	tags=10%, list=12%, signal=12%	NA
REACTOME_SIGNALLING_TO_RAS	REACTOME_SIGNALLING_TO_RAS		27	-0.284613	-0.811746	0.733114	0.816422	1	3170	tags=30%, list=15%, signal=35%	NA
REACTOME_TRAF6_MEDIATED_NFKB_ACTIVATION	REACTOME_TRAF6_MEDIATED_NFKB_ACTIVATION		21	-0.294645	-0.80888	0.721311	0.819937	1	3144	tags=24%, list=15%, signal=28%	NA
PID_HIF1A_PATHWAY	PID_HIF1A_PATHWAY		19	-0.302435	-0.808815	0.72117	0.818847	1	131	tags=5%, list=1%, signal=5%	NA
REACTOME_COLLAGEN_FORMATION	REACTOME_COLLAGEN_FORMATION		56	-0.243914	-0.807541	0.758454	0.819704	1	16	tags=2%, list=0%, signal=2%	NA
KEGG_TIGHT_JUNCTION	KEGG_TIGHT_JUNCTION		130	-0.214098	-0.805366	0.834247	0.822048	1	3739	tags=18%, list=17%, signal=21%	NA
REACTOME_SHC_RELATED_EVENTS	REACTOME_SHC_RELATED_EVENTS		17	-0.312704	-0.804096	0.694444	0.822968	1	3170	tags=35%, list=15%, signal=41%	NA
REACTOME_SIGNALING_BY_ROBO_RECEPTOR	REACTOME_SIGNALING_BY_ROBO_RECEPTOR		29	-0.274978	-0.802931	0.733553	0.823699	1	5071	tags=34%, list=23%, signal=45%	NA
BIOCARTA_RARRXR_PATHWAY	BIOCARTA_RARRXR_PATHWAY		15	-0.321865	-0.801475	0.723562	0.825006	1	1705	tags=20%, list=8%, signal=22%	NA
REACTOME_REGULATION_OF_HYPOXIA_INDUCIBLE_FACTOR_HIF_BY_OXYGEN	REACTOME_REGULATION_OF_HYPOXIA_INDUCIBLE_FACTOR_HIF_BY_OXYGEN		23	-0.289162	-0.801195	0.713793	0.824259	1	3965	tags=30%, list=18%, signal=37%	NA
REACTOME_COSTIMULATION_BY_THE_CD28_FAMILY	REACTOME_COSTIMULATION_BY_THE_CD28_FAMILY		60	-0.238415	-0.795599	0.777778	0.832137	1	2288	tags=15%, list=11%, signal=17%	NA
PID_WNT_CANONICAL_PATHWAY	PID_WNT_CANONICAL_PATHWAY		20	-0.293895	-0.79432	0.738964	0.832896	1	4881	tags=45%, list=23%, signal=58%	NA
REACTOME_SMOOTH_MUSCLE_CONTRACTION	REACTOME_SMOOTH_MUSCLE_CONTRACTION		24	-0.277323	-0.792939	0.751724	0.83386	1	5864	tags=46%, list=27%, signal=63%	NA
REACTOME_GENERATION_OF_SECOND_MESSENGER_MOLECULES	REACTOME_GENERATION_OF_SECOND_MESSENGER_MOLECULES		25	-0.28571	-0.792041	0.73638	0.834085	1	3682	tags=20%, list=17%, signal=24%	NA
HALLMARK_SPERMATOGENESIS	HALLMARK_SPERMATOGENESIS		134	-0.208455	-0.787006	0.868132	0.840457	1	3298	tags=16%, list=15%, signal=18%	NA
REACTOME_AXON_GUIDANCE	REACTOME_AXON_GUIDANCE		242	-0.190511	-0.774625	0.951005	0.857882	1	3619	tags=18%, list=17%, signal=22%	NA
REACTOME_RECYCLING_PATHWAY_OF_L1	REACTOME_RECYCLING_PATHWAY_OF_L1		27	-0.273531	-0.774026	0.760832	0.857545	1	2364	tags=22%, list=11%, signal=25%	NA
KEGG_NEUROACTIVE_LIGAND_RECEPTOR_INTERACTION	KEGG_NEUROACTIVE_LIGAND_RECEPTOR_INTERACTION		267	-0.18561	-0.768873	0.947955	0.863726	1	2043	tags=7%, list=9%, signal=7%	NA
KEGG_HOMOLOGOUS_RECOMBINATION	KEGG_HOMOLOGOUS_RECOMBINATION		28	-0.266663	-0.765064	0.807626	0.867933	1	2975	tags=21%, list=14%, signal=25%	NA
REACTOME_DEADENYLATION_OF_MRNA	REACTOME_DEADENYLATION_OF_MRNA		18	-0.29573	-0.764832	0.801105	0.867007	1	4987	tags=56%, list=23%, signal=72%	NA
REACTOME_PLATELET_CALCIUM_HOMEOSTASIS	REACTOME_PLATELET_CALCIUM_HOMEOSTASIS		16	-0.299043	-0.763849	0.775281	0.867234	1	3432	tags=25%, list=16%, signal=30%	NA
REACTOME_LIPOPROTEIN_METABOLISM	REACTOME_LIPOPROTEIN_METABOLISM		27	-0.269613	-0.762294	0.783876	0.868081	1	955	tags=11%, list=4%, signal=12%	NA
REACTOME_BETA_DEFENSINS	REACTOME_BETA_DEFENSINS		40	-0.246437	-0.761982	0.804309	0.86726	1	136	tags=3%, list=1%, signal=3%	NA
PID_HIF2PATHWAY	PID_HIF2PATHWAY		34	-0.249118	-0.757171	0.814685	0.872565	1	3965	tags=29%, list=18%, signal=36%	NA
REACTOME_ACYL_CHAIN_REMODELLING_OF_PS	REACTOME_ACYL_CHAIN_REMODELLING_OF_PS		15	-0.299919	-0.754614	0.772201	0.874939	1	5348	tags=33%, list=25%, signal=44%	NA
KEGG_PRIMARY_IMMUNODEFICIENCY	KEGG_PRIMARY_IMMUNODEFICIENCY		35	-0.251004	-0.748439	0.825127	0.881897	1	890	tags=11%, list=4%, signal=12%	NA
REACTOME_INCRETIN_SYNTHESIS_SECRETION_AND_INACTIVATION	REACTOME_INCRETIN_SYNTHESIS_SECRETION_AND_INACTIVATION		19	-0.274848	-0.746278	0.802536	0.883427	1	1481	tags=11%, list=7%, signal=11%	NA
BIOCARTA_AKAPCENTROSOME_PATHWAY	BIOCARTA_AKAPCENTROSOME_PATHWAY		15	-0.293904	-0.741784	0.775281	0.887877	1	2024	tags=27%, list=9%, signal=29%	NA
KEGG_PENTOSE_AND_GLUCURONATE_INTERCONVERSIONS	KEGG_PENTOSE_AND_GLUCURONATE_INTERCONVERSIONS		24	-0.265094	-0.738435	0.798951	0.890856	1	3119	tags=17%, list=14%, signal=19%	NA
REACTOME_SHC_MEDIATED_SIGNALLING	REACTOME_SHC_MEDIATED_SIGNALLING		15	-0.284205	-0.733806	0.784387	0.895173	1	3170	tags=33%, list=15%, signal=39%	NA
PID_CD40_PATHWAY	PID_CD40_PATHWAY		31	-0.245382	-0.727261	0.84975	0.901754	1	4535	tags=32%, list=21%, signal=41%	NA
REACTOME_GLUCURONIDATION	REACTOME_GLUCURONIDATION		17	-0.279508	-0.715712	0.81338	0.913717	1	15608	tags=100%, list=72%, signal=358%	NA
BIOCARTA_PTDINS_PATHWAY	BIOCARTA_PTDINS_PATHWAY		23	-0.26113	-0.714911	0.838366	0.913312	1	3930	tags=35%, list=18%, signal=42%	NA
KEGG_BUTANOATE_METABOLISM	KEGG_BUTANOATE_METABOLISM		34	-0.23596	-0.711055	0.857616	0.916241	1	3186	tags=21%, list=15%, signal=24%	NA
BIOCARTA_BCR_PATHWAY	BIOCARTA_BCR_PATHWAY		34	-0.235254	-0.709704	0.862917	0.916439	1	4744	tags=35%, list=22%, signal=45%	NA
KEGG_GLYCOSYLPHOSPHATIDYLINOSITOL_GPI_ANCHOR_BIOSYNTHESIS	KEGG_GLYCOSYLPHOSPHATIDYLINOSITOL_GPI_ANCHOR_BIOSYNTHESIS		24	-0.24632	-0.695842	0.847176	0.929036	1	4780	tags=42%, list=22%, signal=53%	NA
REACTOME_PHOSPHOLIPASE_C_MEDIATED_CASCADE	REACTOME_PHOSPHOLIPASE_C_MEDIATED_CASCADE		53	-0.212841	-0.694709	0.914654	0.92887	1	2024	tags=13%, list=9%, signal=15%	NA
REACTOME_SHC1_EVENTS_IN_EGFR_SIGNALING	REACTOME_SHC1_EVENTS_IN_EGFR_SIGNALING		15	-0.267059	-0.665661	0.87242	0.952438	1	3170	tags=33%, list=15%, signal=39%	NA
BIOCARTA_VIP_PATHWAY	BIOCARTA_VIP_PATHWAY		26	-0.228023	-0.664382	0.883424	0.952092	1	3144	tags=19%, list=15%, signal=22%	NA
BIOCARTA_MTA3_PATHWAY	BIOCARTA_MTA3_PATHWAY		18	-0.251421	-0.658257	0.898734	0.95534	1	3121	tags=17%, list=14%, signal=19%	NA
KEGG_ABC_TRANSPORTERS	KEGG_ABC_TRANSPORTERS		44	-0.206397	-0.650632	0.957655	0.959543	1	3350	tags=23%, list=15%, signal=27%	NA
HALLMARK_KRAS_SIGNALING_DN	HALLMARK_KRAS_SIGNALING_DN		195	-0.161748	-0.642785	0.998691	0.963704	1	2538	tags=8%, list=12%, signal=9%	NA
REACTOME_SYNTHESIS_OF_PA	REACTOME_SYNTHESIS_OF_PA		27	-0.226736	-0.640622	0.901582	0.963816	1	1332	tags=11%, list=6%, signal=12%	NA
REACTOME_RAS_ACTIVATION_UOPN_CA2_INFUX_THROUGH_NMDA_RECEPTOR	REACTOME_RAS_ACTIVATION_UOPN_CA2_INFUX_THROUGH_NMDA_RECEPTOR		16	-0.253627	-0.638894	0.887324	0.96359	1	1603	tags=13%, list=7%, signal=13%	NA
REACTOME_TIGHT_JUNCTION_INTERACTIONS	REACTOME_TIGHT_JUNCTION_INTERACTIONS		29	-0.210168	-0.619575	0.946903	0.973366	1	3571	tags=14%, list=16%, signal=16%	NA
BIOCARTA_STEM_PATHWAY	BIOCARTA_STEM_PATHWAY		15	-0.243856	-0.615802	0.908257	0.974053	1	966	tags=7%, list=4%, signal=7%	NA
REACTOME_ABCA_TRANSPORTERS_IN_LIPID_HOMEOSTASIS	REACTOME_ABCA_TRANSPORTERS_IN_LIPID_HOMEOSTASIS		17	-0.233428	-0.601508	0.929856	0.979631	1	3832	tags=24%, list=18%, signal=29%	NA
REACTOME_CELL_CELL_JUNCTION_ORGANIZATION	REACTOME_CELL_CELL_JUNCTION_ORGANIZATION		56	-0.179966	-0.598698	0.983713	0.979466	1	2682	tags=11%, list=12%, signal=12%	NA
REACTOME_NA_CL_DEPENDENT_NEUROTRANSMITTER_TRANSPORTERS	REACTOME_NA_CL_DEPENDENT_NEUROTRANSMITTER_TRANSPORTERS		17	-0.228406	-0.598261	0.922495	0.978319	1	793	tags=6%, list=4%, signal=6%	NA
KEGG_INTESTINAL_IMMUNE_NETWORK_FOR_IGA_PRODUCTION	KEGG_INTESTINAL_IMMUNE_NETWORK_FOR_IGA_PRODUCTION		45	-0.188514	-0.591289	0.978998	0.979751	1	348	tags=4%, list=2%, signal=5%	NA
KEGG_CARDIAC_MUSCLE_CONTRACTION	KEGG_CARDIAC_MUSCLE_CONTRACTION		72	-0.1628	-0.55907	0.995208	0.989373	1	1251	tags=4%, list=6%, signal=4%	NA
REACTOME_ADHERENS_JUNCTIONS_INTERACTIONS	REACTOME_ADHERENS_JUNCTIONS_INTERACTIONS		27	-0.181505	-0.533993	0.984071	0.994174	1	2196	tags=11%, list=10%, signal=12%	NA
REACTOME_ACTIVATED_POINT_MUTANTS_OF_FGFR2	REACTOME_ACTIVATED_POINT_MUTANTS_OF_FGFR2		16	-0.201211	-0.518266	0.959302	0.995847	1	17302	tags=100%, list=80%, signal=497%	NA
KEGG_LINOLEIC_ACID_METABOLISM	KEGG_LINOLEIC_ACID_METABOLISM		29	-0.175706	-0.507576	0.994889	0.996209	1	16531	tags=97%, list=76%, signal=407%	NA
REACTOME_ACYL_CHAIN_REMODELLING_OF_PG	REACTOME_ACYL_CHAIN_REMODELLING_OF_PG		16	-0.196813	-0.496295	0.965974	0.996538	1	6651	tags=38%, list=31%, signal=54%	NA
REACTOME_SYNTHESIS_OF_BILE_ACIDS_AND_BILE_SALTS_VIA_7ALPHA_HYDROXYCHOLESTEROL	REACTOME_SYNTHESIS_OF_BILE_ACIDS_AND_BILE_SALTS_VIA_7ALPHA_HYDROXYCHOLESTEROL		15	-0.189606	-0.479306	0.98694	0.997149	1	3840	tags=20%, list=18%, signal=24%	NA
KEGG_ALPHA_LINOLENIC_ACID_METABOLISM	KEGG_ALPHA_LINOLENIC_ACID_METABOLISM		19	-0.166377	-0.436592	0.992395	0.998936	1	2038	tags=11%, list=9%, signal=12%	NA
BIOCARTA_AMI_PATHWAY	BIOCARTA_AMI_PATHWAY		20	-0.147548	-0.399951	0.996289	0.999057	1	6488	tags=40%, list=30%, signal=57%	NA
HALLMARK_MYC_TARGETS_V2	HALLMARK_MYC_TARGETS_V2	Details ...	58	0.676366	2.51597	0	0	0	3294	tags=66%, list=15%, signal=77%	NA
KEGG_RNA_POLYMERASE	KEGG_RNA_POLYMERASE	Details ...	29	0.592247	1.93875	0.00225734	0.0906285	0.187	5940	tags=72%, list=27%, signal=100%	NA
REACTOME_G1_S_SPECIFIC_TRANSCRIPTION	REACTOME_G1_S_SPECIFIC_TRANSCRIPTION	Details ...	18	0.663905	1.8944	0	0.102558	0.289	2548	tags=50%, list=12%, signal=57%	NA
REACTOME_DEGRADATION_OF_THE_EXTRACELLULAR_MATRIX	REACTOME_DEGRADATION_OF_THE_EXTRACELLULAR_MATRIX	Details ...	28	0.571102	1.85878	0.00514139	0.117185	0.405	5838	tags=46%, list=27%, signal=63%	NA
PID_FOXM1_PATHWAY	PID_FOXM1_PATHWAY	Details ...	40	0.522709	1.82196	0.00253165	0.141584	0.532	5238	tags=60%, list=24%, signal=79%	NA
HALLMARK_MYC_TARGETS_V1	HALLMARK_MYC_TARGETS_V1	Details ...	199	0.390462	1.80678	0	0.140353	0.599	4734	tags=46%, list=22%, signal=58%	NA
REACTOME_MRNA_SPLICING_MINOR_PATHWAY	REACTOME_MRNA_SPLICING_MINOR_PATHWAY	Details ...	42	0.521174	1.799	0.00757576	0.130992	0.63	5196	tags=62%, list=24%, signal=81%	NA
REACTOME_FORMATION_OF_TUBULIN_FOLDING_INTERMEDIATES_BY_CCT_TRIC	REACTOME_FORMATION_OF_TUBULIN_FOLDING_INTERMEDIATES_BY_CCT_TRIC	Details ...	21	0.614524	1.7912	0.00409836	0.123574	0.662	5380	tags=67%, list=25%, signal=89%	NA
REACTOME_CHONDROITIN_SULFATE_DERMATAN_SULFATE_METABOLISM	REACTOME_CHONDROITIN_SULFATE_DERMATAN_SULFATE_METABOLISM	Details ...	47	0.490234	1.78073	0.00265957	0.124187	0.705	3020	tags=36%, list=14%, signal=42%	NA
HALLMARK_E2F_TARGETS	HALLMARK_E2F_TARGETS	Details ...	199	0.380857	1.77105	0	0.124564	0.74	3150	tags=43%, list=15%, signal=50%	NA
KEGG_ASTHMA	KEGG_ASTHMA	Details ...	27	0.557714	1.75142	0.0046729	0.138892	0.812	127	tags=11%, list=1%, signal=11%	NA
REACTOME_DNA_STRAND_ELONGATION	REACTOME_DNA_STRAND_ELONGATION	Details ...	30	0.533587	1.74459	0.00484261	0.136065	0.834	2912	tags=47%, list=13%, signal=54%	NA
REACTOME_MICRORNA_MIRNA_BIOGENESIS	REACTOME_MICRORNA_MIRNA_BIOGENESIS	Details ...	18	0.613806	1.7415	0.00451467	0.130376	0.845	4230	tags=72%, list=20%, signal=90%	NA
REACTOME_S_PHASE	REACTOME_S_PHASE	Details ...	105	0.414882	1.72806	0	0.13763	0.889	4564	tags=51%, list=21%, signal=65%	NA
REACTOME_EXTENSION_OF_TELOMERES	REACTOME_EXTENSION_OF_TELOMERES	Details ...	27	0.542904	1.72259	0.00936768	0.134938	0.901	3206	tags=48%, list=15%, signal=56%	NA
REACTOME_G1_S_TRANSITION	REACTOME_G1_S_TRANSITION	Details ...	106	0.40761	1.70373	0	0.151478	0.937	4564	tags=51%, list=21%, signal=64%	NA
REACTOME_POST_CHAPERONIN_TUBULIN_FOLDING_PATHWAY	REACTOME_POST_CHAPERONIN_TUBULIN_FOLDING_PATHWAY	Details ...	18	0.596195	1.696	0.0146751	0.153163	0.95	5380	tags=50%, list=25%, signal=66%	NA
REACTOME_PREFOLDIN_MEDIATED_TRANSFER_OF_SUBSTRATE_TO_CCT_TRIC	REACTOME_PREFOLDIN_MEDIATED_TRANSFER_OF_SUBSTRATE_TO_CCT_TRIC	Details ...	27	0.542587	1.67427	0.0119048	0.174772	0.968	4302	tags=56%, list=20%, signal=69%	NA
KEGG_DNA_REPLICATION	KEGG_DNA_REPLICATION	Details ...	36	0.505795	1.66818	0.0144928	0.173498	0.973	3541	tags=47%, list=16%, signal=56%	NA
REACTOME_AMINO_ACID_SYNTHESIS_AND_INTERCONVERSION_TRANSAMINATION	REACTOME_AMINO_ACID_SYNTHESIS_AND_INTERCONVERSION_TRANSAMINATION	Details ...	16	0.604427	1.66405	0.0160183	0.171125	0.975	967	tags=38%, list=4%, signal=39%	NA
REACTOME_M_G1_TRANSITION	REACTOME_M_G1_TRANSITION		77	0.42031	1.66294	0.00284091	0.164433	0.975	4899	tags=55%, list=23%, signal=70%	NA
REACTOME_INFLUENZA_VIRAL_RNA_TRANSCRIPTION_AND_REPLICATION	REACTOME_INFLUENZA_VIRAL_RNA_TRANSCRIPTION_AND_REPLICATION		104	0.402347	1.66036	0	0.160307	0.976	2954	tags=23%, list=14%, signal=27%	NA
REACTOME_ELONGATION_ARREST_AND_RECOVERY	REACTOME_ELONGATION_ARREST_AND_RECOVERY		27	0.520179	1.65971	0.0146341	0.15433	0.976	5631	tags=59%, list=26%, signal=80%	NA
REACTOME_ABORTIVE_ELONGATION_OF_HIV1_TRANSCRIPT_IN_THE_ABSENCE_OF_TAT	REACTOME_ABORTIVE_ELONGATION_OF_HIV1_TRANSCRIPT_IN_THE_ABSENCE_OF_TAT		19	0.572073	1.65597	0.0185185	0.153112	0.977	4901	tags=63%, list=23%, signal=82%	NA
BIOCARTA_INFLAM_PATHWAY	BIOCARTA_INFLAM_PATHWAY		28	0.518153	1.63066	0.0118765	0.18317	0.991	1822	tags=14%, list=8%, signal=16%	NA
REACTOME_RNA_POL_III_CHAIN_ELONGATION	REACTOME_RNA_POL_III_CHAIN_ELONGATION		17	0.574128	1.62097	0.0183066	0.190948	0.996	5157	tags=71%, list=24%, signal=93%	NA
PID_RXR_VDR_PATHWAY	PID_RXR_VDR_PATHWAY		26	0.512289	1.61591	0.02407	0.191922	0.997	725	tags=23%, list=3%, signal=24%	NA
REACTOME_MITOTIC_G1_G1_S_PHASES	REACTOME_MITOTIC_G1_G1_S_PHASES		131	0.368574	1.6138	0	0.188906	0.998	4564	tags=47%, list=21%, signal=59%	NA
REACTOME_HS_GAG_DEGRADATION	REACTOME_HS_GAG_DEGRADATION		20	0.544025	1.60627	0.0381166	0.1937	0.999	1321	tags=30%, list=6%, signal=32%	NA
REACTOME_ACTIVATION_OF_ATR_IN_RESPONSE_TO_REPLICATION_STRESS	REACTOME_ACTIVATION_OF_ATR_IN_RESPONSE_TO_REPLICATION_STRESS		35	0.474933	1.60408	0.0130208	0.190373	0.999	3541	tags=49%, list=16%, signal=58%	NA
BIOCARTA_CDMAC_PATHWAY	BIOCARTA_CDMAC_PATHWAY		16	0.576983	1.59241	0.022831	0.201796	0.999	486	tags=31%, list=2%, signal=32%	NA
REACTOME_METABOLISM_OF_RNA	REACTOME_METABOLISM_OF_RNA		256	0.33265	1.58322	0	0.208714	1	4369	tags=38%, list=20%, signal=47%	NA
PID_HDAC_CLASSI_PATHWAY	PID_HDAC_CLASSI_PATHWAY		66	0.412192	1.5821	0.00773196	0.204202	1	3835	tags=42%, list=18%, signal=51%	NA
REACTOME_REGULATORY_RNA_PATHWAYS	REACTOME_REGULATORY_RNA_PATHWAYS		21	0.542581	1.57535	0.0308057	0.208157	1	4230	tags=67%, list=20%, signal=83%	NA
PID_BETA_CATENIN_NUC_PATHWAY	PID_BETA_CATENIN_NUC_PATHWAY		79	0.391681	1.5753	0.0060241	0.202381	1	2501	tags=22%, list=12%, signal=24%	NA
REACTOME_AMINO_ACID_TRANSPORT_ACROSS_THE_PLASMA_MEMBRANE	REACTOME_AMINO_ACID_TRANSPORT_ACROSS_THE_PLASMA_MEMBRANE		31	0.475005	1.56762	0.0143198	0.208527	1	2348	tags=32%, list=11%, signal=36%	NA
REACTOME_PTM_GAMMA_CARBOXYLATION_HYPUSINE_FORMATION_AND_ARYLSULFATASE_ACTIVATION	REACTOME_PTM_GAMMA_CARBOXYLATION_HYPUSINE_FORMATION_AND_ARYLSULFATASE_ACTIVATION		26	0.496077	1.56182	0.0339367	0.21201	1	3738	tags=38%, list=17%, signal=46%	NA
REACTOME_SYNTHESIS_OF_DNA	REACTOME_SYNTHESIS_OF_DNA		89	0.381325	1.56141	0.00890208	0.207268	1	4510	tags=49%, list=21%, signal=62%	NA
REACTOME_RNA_POL_III_TRANSCRIPTION_INITIATION_FROM_TYPE_2_PROMOTER	REACTOME_RNA_POL_III_TRANSCRIPTION_INITIATION_FROM_TYPE_2_PROMOTER		23	0.511772	1.55914	0.0240175	0.205849	1	5940	tags=74%, list=27%, signal=102%	NA
REACTOME_RNA_POL_III_TRANSCRIPTION_TERMINATION	REACTOME_RNA_POL_III_TRANSCRIPTION_TERMINATION		19	0.539838	1.55644	0.0381166	0.204583	1	5157	tags=63%, list=24%, signal=83%	NA
REACTOME_CHONDROITIN_SULFATE_BIOSYNTHESIS	REACTOME_CHONDROITIN_SULFATE_BIOSYNTHESIS		19	0.53252	1.55102	0.0137615	0.208181	1	2891	tags=37%, list=13%, signal=42%	NA
REACTOME_REGULATION_OF_MITOTIC_CELL_CYCLE	REACTOME_REGULATION_OF_MITOTIC_CELL_CYCLE		76	0.383289	1.53052	0.011976	0.235447	1	4995	tags=50%, list=23%, signal=65%	NA
REACTOME_ASSEMBLY_OF_THE_PRE_REPLICATIVE_COMPLEX	REACTOME_ASSEMBLY_OF_THE_PRE_REPLICATIVE_COMPLEX		62	0.409276	1.53024	0.0141643	0.230397	1	4510	tags=53%, list=21%, signal=67%	NA
REACTOME_CROSS_PRESENTATION_OF_SOLUBLE_EXOGENOUS_ANTIGENS_ENDOSOMES	REACTOME_CROSS_PRESENTATION_OF_SOLUBLE_EXOGENOUS_ANTIGENS_ENDOSOMES		46	0.428959	1.52975	0.0100251	0.226148	1	4510	tags=48%, list=21%, signal=60%	NA
HALLMARK_ANGIOGENESIS	HALLMARK_ANGIOGENESIS		36	0.441689	1.52594	0.026699	0.22754	1	465	tags=25%, list=2%, signal=26%	NA
KEGG_SPLICEOSOME	KEGG_SPLICEOSOME		125	0.359819	1.52207	0.00692042	0.229187	1	4369	tags=46%, list=20%, signal=57%	NA
SA_MMP_CYTOKINE_CONNECTION	SA_MMP_CYTOKINE_CONNECTION		15	0.558903	1.52196	0.058427	0.224499	1	2243	tags=33%, list=10%, signal=37%	NA
REACTOME_FORMATION_OF_THE_HIV1_EARLY_ELONGATION_COMPLEX	REACTOME_FORMATION_OF_THE_HIV1_EARLY_ELONGATION_COMPLEX		29	0.467588	1.5219	0.0193705	0.219911	1	4230	tags=48%, list=20%, signal=60%	NA
REACTOME_RNA_POL_III_TRANSCRIPTION_INITIATION_FROM_TYPE_3_PROMOTER	REACTOME_RNA_POL_III_TRANSCRIPTION_INITIATION_FROM_TYPE_3_PROMOTER		26	0.482213	1.52079	0.0344086	0.217	1	5157	tags=62%, list=24%, signal=81%	NA
REACTOME_ACTIVATION_OF_THE_PRE_REPLICATIVE_COMPLEX	REACTOME_ACTIVATION_OF_THE_PRE_REPLICATIVE_COMPLEX		30	0.46661	1.51135	0.0327103	0.227332	1	4899	tags=60%, list=23%, signal=77%	NA
REACTOME_INFLUENZA_LIFE_CYCLE	REACTOME_INFLUENZA_LIFE_CYCLE		138	0.342148	1.50788	0.0033557	0.228392	1	3208	tags=27%, list=15%, signal=31%	NA
KEGG_GLYCOSAMINOGLYCAN_BIOSYNTHESIS_CHONDROITIN_SULFATE	KEGG_GLYCOSAMINOGLYCAN_BIOSYNTHESIS_CHONDROITIN_SULFATE		22	0.503519	1.49938	0.0511727	0.23753	1	3522	tags=41%, list=16%, signal=49%	NA
BIOCARTA_MCM_PATHWAY	BIOCARTA_MCM_PATHWAY		18	0.510547	1.49854	0.0455531	0.234425	1	4980	tags=72%, list=23%, signal=94%	NA
REACTOME_SCFSKP2_MEDIATED_DEGRADATION_OF_P27_P21	REACTOME_SCFSKP2_MEDIATED_DEGRADATION_OF_P27_P21		52	0.409861	1.49799	0.0384615	0.231382	1	4510	tags=56%, list=21%, signal=70%	NA
REACTOME_HEPARAN_SULFATE_HEPARIN_HS_GAG_METABOLISM	REACTOME_HEPARAN_SULFATE_HEPARIN_HS_GAG_METABOLISM		52	0.405638	1.4958	0.0252101	0.230905	1	3829	tags=31%, list=18%, signal=37%	NA
PID_ATR_PATHWAY	PID_ATR_PATHWAY		39	0.438478	1.49561	0.0211765	0.227051	1	3537	tags=51%, list=16%, signal=61%	NA
REACTOME_A_TETRASACCHARIDE_LINKER_SEQUENCE_IS_REQUIRED_FOR_GAG_SYNTHESIS	REACTOME_A_TETRASACCHARIDE_LINKER_SEQUENCE_IS_REQUIRED_FOR_GAG_SYNTHESIS		25	0.477455	1.49254	0.0437788	0.227784	1	3829	tags=40%, list=18%, signal=49%	NA
REACTOME_MITOTIC_M_M_G1_PHASES	REACTOME_MITOTIC_M_M_G1_PHASES		165	0.327772	1.48544	0	0.234612	1	4560	tags=41%, list=21%, signal=52%	NA
REACTOME_DNA_REPLICATION	REACTOME_DNA_REPLICATION		185	0.328278	1.4846	0.00414938	0.231966	1	4560	tags=42%, list=21%, signal=52%	NA
PID_TCR_CALCIUM_PATHWAY	PID_TCR_CALCIUM_PATHWAY		28	0.45918	1.48452	0.0607477	0.228173	1	5513	tags=43%, list=25%, signal=57%	NA
REACTOME_CYCLIN_E_ASSOCIATED_EVENTS_DURING_G1_S_TRANSITION_	REACTOME_CYCLIN_E_ASSOCIATED_EVENTS_DURING_G1_S_TRANSITION_		61	0.387597	1.48435	0.0238727	0.224563	1	4564	tags=52%, list=21%, signal=66%	NA
REACTOME_METABOLISM_OF_MRNA	REACTOME_METABOLISM_OF_MRNA		211	0.321604	1.48082	0	0.22679	1	4316	tags=34%, list=20%, signal=42%	NA
KEGG_STARCH_AND_SUCROSE_METABOLISM	KEGG_STARCH_AND_SUCROSE_METABOLISM		51	0.403264	1.47753	0.0245232	0.228525	1	1019	tags=14%, list=5%, signal=14%	NA
BIOCARTA_RELA_PATHWAY	BIOCARTA_RELA_PATHWAY		16	0.542425	1.47588	0.0650759	0.227398	1	4340	tags=38%, list=20%, signal=47%	NA
BIOCARTA_IL1R_PATHWAY	BIOCARTA_IL1R_PATHWAY		33	0.443434	1.46025	0.0285036	0.248751	1	242	tags=12%, list=1%, signal=12%	NA
REACTOME_HS_GAG_BIOSYNTHESIS	REACTOME_HS_GAG_BIOSYNTHESIS		31	0.460463	1.45782	0.0481928	0.249208	1	2028	tags=23%, list=9%, signal=25%	NA
REACTOME_HIV_INFECTION	REACTOME_HIV_INFECTION		189	0.321522	1.45605	0.00462963	0.248311	1	4611	tags=44%, list=21%, signal=55%	NA
REACTOME_CELL_CYCLE_CHECKPOINTS	REACTOME_CELL_CYCLE_CHECKPOINTS		110	0.340111	1.44819	0.0166667	0.257421	1	4524	tags=44%, list=21%, signal=55%	NA
REACTOME_STRIATED_MUSCLE_CONTRACTION	REACTOME_STRIATED_MUSCLE_CONTRACTION		27	0.447366	1.44643	0.0555556	0.256642	1	1621	tags=15%, list=7%, signal=16%	NA
HALLMARK_G2M_CHECKPOINT	HALLMARK_G2M_CHECKPOINT		199	0.311426	1.44503	0	0.255042	1	4965	tags=48%, list=23%, signal=62%	NA
BIOCARTA_ETS_PATHWAY	BIOCARTA_ETS_PATHWAY		18	0.501716	1.44272	0.0661939	0.255376	1	3835	tags=56%, list=18%, signal=67%	NA
REACTOME_EXTRACELLULAR_MATRIX_ORGANIZATION	REACTOME_EXTRACELLULAR_MATRIX_ORGANIZATION		84	0.35636	1.44146	0.0121951	0.25373	1	2060	tags=18%, list=10%, signal=20%	NA
REACTOME_MITOCHONDRIAL_PROTEIN_IMPORT	REACTOME_MITOCHONDRIAL_PROTEIN_IMPORT		49	0.396307	1.441	0.0306407	0.251009	1	4667	tags=39%, list=22%, signal=49%	NA
REACTOME_PEPTIDE_CHAIN_ELONGATION	REACTOME_PEPTIDE_CHAIN_ELONGATION		88	0.35321	1.43977	0.0159236	0.249392	1	2954	tags=18%, list=14%, signal=21%	NA
BIOCARTA_KERATINOCYTE_PATHWAY	BIOCARTA_KERATINOCYTE_PATHWAY		46	0.399825	1.43786	0.0359897	0.249103	1	4111	tags=39%, list=19%, signal=48%	NA
HALLMARK_UV_RESPONSE_UP	HALLMARK_UV_RESPONSE_UP		156	0.321333	1.43717	0.00749064	0.246866	1	2710	tags=31%, list=13%, signal=36%	NA
KEGG_PYRIMIDINE_METABOLISM	KEGG_PYRIMIDINE_METABOLISM		96	0.34473	1.42865	0.0186916	0.258255	1	4416	tags=44%, list=20%, signal=55%	NA
REACTOME_CELL_CYCLE_MITOTIC	REACTOME_CELL_CYCLE_MITOTIC		308	0.292899	1.42795	0	0.256232	1	4564	tags=37%, list=21%, signal=47%	NA
REACTOME_FORMATION_OF_RNA_POL_II_ELONGATION_COMPLEX_	REACTOME_FORMATION_OF_RNA_POL_II_ELONGATION_COMPLEX_		39	0.420716	1.42785	0.0613811	0.253213	1	4230	tags=44%, list=20%, signal=54%	NA
REACTOME_APC_C_CDH1_MEDIATED_DEGRADATION_OF_CDC20_AND_OTHER_APC_C_CDH1_TARGETED_PROTEINS_IN_LATE_MITOSIS_EARLY_G1	REACTOME_APC_C_CDH1_MEDIATED_DEGRADATION_OF_CDC20_AND_OTHER_APC_C_CDH1_TARGETED_PROTEINS_IN_LATE_MITOSIS_EARLY_G1		63	0.376279	1.42645	0.0454545	0.252304	1	4995	tags=51%, list=23%, signal=66%	NA
HALLMARK_WNT_BETA_CATENIN_SIGNALING	HALLMARK_WNT_BETA_CATENIN_SIGNALING		42	0.397643	1.42481	0.0458015	0.252123	1	4847	tags=48%, list=22%, signal=61%	NA
REACTOME_PROTEIN_FOLDING	REACTOME_PROTEIN_FOLDING		51	0.385156	1.42424	0.0431267	0.249907	1	5426	tags=51%, list=25%, signal=68%	NA
REACTOME_HOST_INTERACTIONS_OF_HIV_FACTORS	REACTOME_HOST_INTERACTIONS_OF_HIV_FACTORS		120	0.334694	1.42374	0.0160256	0.247698	1	4611	tags=46%, list=21%, signal=58%	NA
REACTOME_G2_M_CHECKPOINTS	REACTOME_G2_M_CHECKPOINTS		41	0.41205	1.42145	0.0642674	0.248445	1	3541	tags=41%, list=16%, signal=49%	NA
BIOCARTA_TID_PATHWAY	BIOCARTA_TID_PATHWAY		19	0.479556	1.42119	0.0744921	0.245917	1	632	tags=21%, list=3%, signal=22%	NA
REACTOME_RNA_POL_III_TRANSCRIPTION	REACTOME_RNA_POL_III_TRANSCRIPTION		33	0.421772	1.41949	0.0597403	0.245773	1	5507	tags=58%, list=25%, signal=77%	NA
REACTOME_REGULATION_OF_ORNITHINE_DECARBOXYLASE_ODC	REACTOME_REGULATION_OF_ORNITHINE_DECARBOXYLASE_ODC		47	0.397089	1.41592	0.0377359	0.248804	1	4510	tags=49%, list=21%, signal=62%	NA
KEGG_RIBOSOME	KEGG_RIBOSOME		85	0.347562	1.41349	0.0188088	0.249855	1	2954	tags=18%, list=14%, signal=20%	NA
PID_CASPASE_PATHWAY	PID_CASPASE_PATHWAY		52	0.381246	1.40686	0.0415512	0.257522	1	1036	tags=15%, list=5%, signal=16%	NA
REACTOME_HIV_LIFE_CYCLE	REACTOME_HIV_LIFE_CYCLE		111	0.331507	1.40621	0.0176056	0.255657	1	4247	tags=44%, list=20%, signal=55%	NA
REACTOME_AMINO_ACID_AND_OLIGOPEPTIDE_SLC_TRANSPORTERS	REACTOME_AMINO_ACID_AND_OLIGOPEPTIDE_SLC_TRANSPORTERS		49	0.382055	1.40444	0.0402145	0.255721	1	2348	tags=27%, list=11%, signal=30%	NA
REACTOME_METABOLISM_OF_NON_CODING_RNA	REACTOME_METABOLISM_OF_NON_CODING_RNA		48	0.383388	1.40399	0.0353261	0.253785	1	5196	tags=63%, list=24%, signal=82%	NA
PID_AURORA_B_PATHWAY	PID_AURORA_B_PATHWAY		39	0.405966	1.40166	0.0560748	0.254592	1	3654	tags=46%, list=17%, signal=55%	NA
REACTOME_SCF_BETA_TRCP_MEDIATED_DEGRADATION_OF_EMI1	REACTOME_SCF_BETA_TRCP_MEDIATED_DEGRADATION_OF_EMI1		48	0.38366	1.3973	0.0421053	0.259024	1	4510	tags=50%, list=21%, signal=63%	NA
REACTOME_CYCLIN_A_B1_ASSOCIATED_EVENTS_DURING_G2_M_TRANSITION	REACTOME_CYCLIN_A_B1_ASSOCIATED_EVENTS_DURING_G2_M_TRANSITION		15	0.518233	1.39562	0.107066	0.259051	1	4215	tags=47%, list=19%, signal=58%	NA
REACTOME_NUCLEOTIDE_EXCISION_REPAIR	REACTOME_NUCLEOTIDE_EXCISION_REPAIR		49	0.385762	1.39115	0.0580475	0.263743	1	4230	tags=43%, list=20%, signal=53%	NA
REACTOME_CDK_MEDIATED_PHOSPHORYLATION_AND_REMOVAL_OF_CDC6	REACTOME_CDK_MEDIATED_PHOSPHORYLATION_AND_REMOVAL_OF_CDC6		45	0.388136	1.37698	0.0546875	0.284367	1	4510	tags=51%, list=21%, signal=64%	NA
REACTOME_LATE_PHASE_OF_HIV_LIFE_CYCLE	REACTOME_LATE_PHASE_OF_HIV_LIFE_CYCLE		97	0.331943	1.37544	0.031746	0.28398	1	4247	tags=43%, list=20%, signal=54%	NA
REACTOME_E2F_MEDIATED_REGULATION_OF_DNA_REPLICATION	REACTOME_E2F_MEDIATED_REGULATION_OF_DNA_REPLICATION		34	0.406826	1.37387	0.0640394	0.283717	1	2548	tags=35%, list=12%, signal=40%	NA
REACTOME_MRNA_SPLICING	REACTOME_MRNA_SPLICING		106	0.322252	1.37178	0.0230263	0.284327	1	4755	tags=49%, list=22%, signal=63%	NA
REACTOME_TRANSCRIPTION_COUPLED_NER_TC_NER	REACTOME_TRANSCRIPTION_COUPLED_NER_TC_NER		44	0.389306	1.37129	0.0745501	0.282341	1	4230	tags=43%, list=20%, signal=54%	NA
REACTOME_VOLTAGE_GATED_POTASSIUM_CHANNELS	REACTOME_VOLTAGE_GATED_POTASSIUM_CHANNELS		43	0.388633	1.37092	0.0565553	0.280297	1	7985	tags=56%, list=37%, signal=88%	NA
REACTOME_THE_ROLE_OF_NEF_IN_HIV1_REPLICATION_AND_DISEASE_PATHOGENESIS	REACTOME_THE_ROLE_OF_NEF_IN_HIV1_REPLICATION_AND_DISEASE_PATHOGENESIS		27	0.432589	1.36659	0.100478	0.284737	1	5303	tags=52%, list=24%, signal=69%	NA
REACTOME_ORC1_REMOVAL_FROM_CHROMATIN	REACTOME_ORC1_REMOVAL_FROM_CHROMATIN		64	0.355278	1.36527	0.0668524	0.284358	1	4510	tags=52%, list=21%, signal=65%	NA
REACTOME_REGULATION_OF_INSULIN_LIKE_GROWTH_FACTOR_IGF_ACTIVITY_BY_INSULIN_LIKE_GROWTH_FACTOR_BINDING_PROTEINS_IGFBPS	REACTOME_REGULATION_OF_INSULIN_LIKE_GROWTH_FACTOR_IGF_ACTIVITY_BY_INSULIN_LIKE_GROWTH_FACTOR_BINDING_PROTEINS_IGFBPS		16	0.49086	1.36315	0.112128	0.285314	1	5396	tags=69%, list=25%, signal=91%	NA
HALLMARK_DNA_REPAIR	HALLMARK_DNA_REPAIR		143	0.309996	1.36222	0.019305	0.284133	1	4416	tags=42%, list=20%, signal=52%	NA
REACTOME_CELL_CYCLE	REACTOME_CELL_CYCLE		398	0.272713	1.35682	0	0.290805	1	4564	tags=35%, list=21%, signal=43%	NA
KEGG_GLYCOSAMINOGLYCAN_BIOSYNTHESIS_KERATAN_SULFATE	KEGG_GLYCOSAMINOGLYCAN_BIOSYNTHESIS_KERATAN_SULFATE		15	0.496779	1.35307	0.108932	0.294621	1	1250	tags=33%, list=6%, signal=35%	NA
REACTOME_GLYCOSAMINOGLYCAN_METABOLISM	REACTOME_GLYCOSAMINOGLYCAN_METABOLISM		109	0.317024	1.34647	0.0385852	0.303117	1	3580	tags=28%, list=17%, signal=34%	NA
REACTOME_P53_INDEPENDENT_G1_S_DNA_DAMAGE_CHECKPOINT	REACTOME_P53_INDEPENDENT_G1_S_DNA_DAMAGE_CHECKPOINT		47	0.370899	1.34604	0.0734177	0.301203	1	4510	tags=49%, list=21%, signal=62%	NA
PID_HDAC_CLASSIII_PATHWAY	PID_HDAC_CLASSIII_PATHWAY		25	0.42767	1.34486	0.105769	0.300529	1	2690	tags=40%, list=12%, signal=46%	NA
NABA_ECM_AFFILIATED	NABA_ECM_AFFILIATED		162	0.298575	1.34229	0.0251046	0.302362	1	1820	tags=13%, list=8%, signal=14%	NA
REACTOME_SIGNALING_BY_WNT	REACTOME_SIGNALING_BY_WNT		61	0.35173	1.34208	0.0637119	0.299968	1	4560	tags=48%, list=21%, signal=60%	NA
REACTOME_FORMATION_OF_THE_TERNARY_COMPLEX_AND_SUBSEQUENTLY_THE_43S_COMPLEX	REACTOME_FORMATION_OF_THE_TERNARY_COMPLEX_AND_SUBSEQUENTLY_THE_43S_COMPLEX		49	0.374594	1.33074	0.0787402	0.317389	1	1810	tags=18%, list=8%, signal=20%	NA
REACTOME_NONSENSE_MEDIATED_DECAY_ENHANCED_BY_THE_EXON_JUNCTION_COMPLEX	REACTOME_NONSENSE_MEDIATED_DECAY_ENHANCED_BY_THE_EXON_JUNCTION_COMPLEX		109	0.316938	1.33031	0.0466667	0.315409	1	4641	tags=27%, list=21%, signal=34%	NA
REACTOME_REGULATION_OF_MRNA_STABILITY_BY_PROTEINS_THAT_BIND_AU_RICH_ELEMENTS	REACTOME_REGULATION_OF_MRNA_STABILITY_BY_PROTEINS_THAT_BIND_AU_RICH_ELEMENTS		80	0.333609	1.32978	0.0460123	0.313581	1	4284	tags=45%, list=20%, signal=56%	NA
KEGG_PURINE_METABOLISM	KEGG_PURINE_METABOLISM		155	0.294032	1.32936	0.00803213	0.311792	1	5259	tags=41%, list=24%, signal=53%	NA
REACTOME_DESTABILIZATION_OF_MRNA_BY_AUF1_HNRNP_D0	REACTOME_DESTABILIZATION_OF_MRNA_BY_AUF1_HNRNP_D0		49	0.368403	1.32728	0.0875332	0.312733	1	4510	tags=49%, list=21%, signal=62%	NA
REACTOME_DNA_REPAIR	REACTOME_DNA_REPAIR		105	0.315013	1.32433	0.0536278	0.315574	1	3336	tags=33%, list=15%, signal=39%	NA
REACTOME_BASIGIN_INTERACTIONS	REACTOME_BASIGIN_INTERACTIONS		25	0.419364	1.32401	0.116505	0.313568	1	4546	tags=44%, list=21%, signal=56%	NA
ST_GA12_PATHWAY	ST_GA12_PATHWAY		23	0.429915	1.32146	0.104167	0.315677	1	826	tags=17%, list=4%, signal=18%	NA
KEGG_AMYOTROPHIC_LATERAL_SCLEROSIS_ALS	KEGG_AMYOTROPHIC_LATERAL_SCLEROSIS_ALS		51	0.358366	1.32013	0.0949868	0.315422	1	4590	tags=39%, list=21%, signal=50%	NA
REACTOME_NETRIN1_SIGNALING	REACTOME_NETRIN1_SIGNALING		38	0.385212	1.3162	0.0909091	0.319701	1	6760	tags=53%, list=31%, signal=76%	NA
REACTOME_LAGGING_STRAND_SYNTHESIS	REACTOME_LAGGING_STRAND_SYNTHESIS		19	0.460002	1.31547	0.137778	0.318412	1	2897	tags=37%, list=13%, signal=42%	NA
REACTOME_FORMATION_OF_TRANSCRIPTION_COUPLED_NER_TC_NER_REPAIR_COMPLEX	REACTOME_FORMATION_OF_TRANSCRIPTION_COUPLED_NER_TC_NER_REPAIR_COMPLEX		29	0.399815	1.31167	0.1125	0.322564	1	4230	tags=45%, list=20%, signal=56%	NA
REACTOME_PROCESSING_OF_CAPPED_INTRON_CONTAINING_PRE_MRNA	REACTOME_PROCESSING_OF_CAPPED_INTRON_CONTAINING_PRE_MRNA		135	0.300421	1.30943	0.0464286	0.323471	1	4369	tags=46%, list=20%, signal=57%	NA
PID_CONE_PATHWAY	PID_CONE_PATHWAY		22	0.445462	1.30853	0.137767	0.322497	1	7045	tags=45%, list=33%, signal=67%	NA
REACTOME_G0_AND_EARLY_G1	REACTOME_G0_AND_EARLY_G1		24	0.416405	1.30635	0.139211	0.32383	1	3537	tags=42%, list=16%, signal=50%	NA
REACTOME_NCAM1_INTERACTIONS	REACTOME_NCAM1_INTERACTIONS		39	0.371244	1.29544	0.125641	0.340962	1	7659	tags=54%, list=35%, signal=83%	NA
REACTOME_RESOLUTION_OF_AP_SITES_VIA_THE_MULTIPLE_NUCLEOTIDE_PATCH_REPLACEMENT_PATHWAY	REACTOME_RESOLUTION_OF_AP_SITES_VIA_THE_MULTIPLE_NUCLEOTIDE_PATCH_REPLACEMENT_PATHWAY		17	0.4522	1.29516	0.147465	0.33881	1	2068	tags=35%, list=10%, signal=39%	NA
KEGG_PROTEASOME	KEGG_PROTEASOME		43	0.363585	1.29137	0.108808	0.343145	1	4510	tags=47%, list=21%, signal=59%	NA
REACTOME_APOPTOTIC_CLEAVAGE_OF_CELLULAR_PROTEINS	REACTOME_APOPTOTIC_CLEAVAGE_OF_CELLULAR_PROTEINS		38	0.382858	1.28573	0.128141	0.350937	1	1036	tags=16%, list=5%, signal=17%	NA
KEGG_HISTIDINE_METABOLISM	KEGG_HISTIDINE_METABOLISM		28	0.407241	1.28473	0.131579	0.350041	1	5474	tags=64%, list=25%, signal=86%	NA
REACTOME_CDT1_ASSOCIATION_WITH_THE_CDC6_ORC_ORIGIN_COMPLEX	REACTOME_CDT1_ASSOCIATION_WITH_THE_CDC6_ORC_ORIGIN_COMPLEX		53	0.345234	1.284	0.0978261	0.348888	1	4510	tags=49%, list=21%, signal=62%	NA
KEGG_GALACTOSE_METABOLISM	KEGG_GALACTOSE_METABOLISM		25	0.414954	1.28331	0.141612	0.34769	1	2238	tags=32%, list=10%, signal=36%	NA
REACTOME_NCAM_SIGNALING_FOR_NEURITE_OUT_GROWTH	REACTOME_NCAM_SIGNALING_FOR_NEURITE_OUT_GROWTH		64	0.330642	1.27519	0.105882	0.360227	1	7099	tags=50%, list=33%, signal=74%	NA
REACTOME_APOPTOSIS	REACTOME_APOPTOSIS		141	0.292299	1.27225	0.0476191	0.363378	1	3937	tags=33%, list=18%, signal=40%	NA
REACTOME_APC_C_CDC20_MEDIATED_DEGRADATION_OF_MITOTIC_PROTEINS	REACTOME_APC_C_CDC20_MEDIATED_DEGRADATION_OF_MITOTIC_PROTEINS		64	0.325959	1.26886	0.0958904	0.36733	1	4995	tags=45%, list=23%, signal=59%	NA
KEGG_SELENOAMINO_ACID_METABOLISM	KEGG_SELENOAMINO_ACID_METABOLISM		26	0.398699	1.26461	0.167816	0.372879	1	4981	tags=58%, list=23%, signal=75%	NA
BIOCARTA_CD40_PATHWAY	BIOCARTA_CD40_PATHWAY		15	0.456474	1.25847	0.189247	0.382001	1	5056	tags=40%, list=23%, signal=52%	NA
REACTOME_NUCLEAR_RECEPTOR_TRANSCRIPTION_PATHWAY	REACTOME_NUCLEAR_RECEPTOR_TRANSCRIPTION_PATHWAY		47	0.355133	1.25726	0.135417	0.381688	1	2001	tags=17%, list=9%, signal=19%	NA
REACTOME_POTASSIUM_CHANNELS	REACTOME_POTASSIUM_CHANNELS		98	0.302063	1.25649	0.0749186	0.380376	1	3128	tags=19%, list=14%, signal=23%	NA
BIOCARTA_TNFR1_PATHWAY	BIOCARTA_TNFR1_PATHWAY		29	0.382668	1.25272	0.15122	0.385289	1	3937	tags=41%, list=18%, signal=51%	NA
KEGG_CELL_CYCLE	KEGG_CELL_CYCLE		124	0.287328	1.2526	0.0734266	0.382821	1	5306	tags=45%, list=25%, signal=59%	NA
REACTOME_MRNA_PROCESSING	REACTOME_MRNA_PROCESSING		155	0.282304	1.25082	0.07393	0.383842	1	4369	tags=44%, list=20%, signal=55%	NA
REACTOME_3_UTR_MEDIATED_TRANSLATIONAL_REGULATION	REACTOME_3_UTR_MEDIATED_TRANSLATIONAL_REGULATION		109	0.303653	1.25009	0.0687285	0.382714	1	1863	tags=15%, list=9%, signal=16%	NA
REACTOME_METABOLISM_OF_CARBOHYDRATES	REACTOME_METABOLISM_OF_CARBOHYDRATES		236	0.270029	1.24453	0.0476191	0.391579	1	2335	tags=22%, list=11%, signal=25%	NA
PID_RB_1PATHWAY	PID_RB_1PATHWAY		64	0.323408	1.24403	0.116711	0.389778	1	4161	tags=42%, list=19%, signal=52%	NA
PID_NFKAPPAB_CANONICAL_PATHWAY	PID_NFKAPPAB_CANONICAL_PATHWAY		23	0.410174	1.24119	0.185882	0.392747	1	242	tags=13%, list=1%, signal=13%	NA
KEGG_ALANINE_ASPARTATE_AND_GLUTAMATE_METABOLISM	KEGG_ALANINE_ASPARTATE_AND_GLUTAMATE_METABOLISM		32	0.3705	1.23469	0.16	0.403339	1	5530	tags=47%, list=26%, signal=63%	NA
PID_AR_PATHWAY	PID_AR_PATHWAY		61	0.325651	1.23116	0.146667	0.407766	1	2081	tags=26%, list=10%, signal=29%	NA
KEGG_BASE_EXCISION_REPAIR	KEGG_BASE_EXCISION_REPAIR		34	0.37134	1.23036	0.14486	0.40689	1	2068	tags=29%, list=10%, signal=32%	NA
REACTOME_MYOGENESIS	REACTOME_MYOGENESIS		28	0.384718	1.22995	0.180488	0.404902	1	1694	tags=21%, list=8%, signal=23%	NA
REACTOME_RNA_POL_II_PRE_TRANSCRIPTION_EVENTS	REACTOME_RNA_POL_II_PRE_TRANSCRIPTION_EVENTS		55	0.336429	1.22952	0.133333	0.403219	1	4247	tags=38%, list=20%, signal=47%	NA
REACTOME_AUTODEGRADATION_OF_CDH1_BY_CDH1_APC_C	REACTOME_AUTODEGRADATION_OF_CDH1_BY_CDH1_APC_C		55	0.330988	1.22059	0.149626	0.41898	1	4524	tags=45%, list=21%, signal=57%	NA
REACTOME_BASE_EXCISION_REPAIR	REACTOME_BASE_EXCISION_REPAIR		19	0.426463	1.21312	0.198598	0.432429	1	2068	tags=32%, list=10%, signal=35%	NA
KEGG_PROXIMAL_TUBULE_BICARBONATE_RECLAMATION	KEGG_PROXIMAL_TUBULE_BICARBONATE_RECLAMATION		23	0.396292	1.21138	0.212446	0.433172	1	1509	tags=22%, list=7%, signal=23%	NA
KEGG_GLYCOSAMINOGLYCAN_BIOSYNTHESIS_HEPARAN_SULFATE	KEGG_GLYCOSAMINOGLYCAN_BIOSYNTHESIS_HEPARAN_SULFATE		26	0.395017	1.20787	0.198582	0.437942	1	3580	tags=35%, list=17%, signal=41%	NA
REACTOME_BIOSYNTHESIS_OF_THE_N_GLYCAN_PRECURSOR_DOLICHOL_LIPID_LINKED_OLIGOSACCHARIDE_LLO_AND_TRANSFER_TO_A_NASCENT_PROTEIN	REACTOME_BIOSYNTHESIS_OF_THE_N_GLYCAN_PRECURSOR_DOLICHOL_LIPID_LINKED_OLIGOSACCHARIDE_LLO_AND_TRANSFER_TO_A_NASCENT_PROTEIN		28	0.379345	1.20596	0.221374	0.439337	1	4974	tags=43%, list=23%, signal=56%	NA
BIOCARTA_CYTOKINE_PATHWAY	BIOCARTA_CYTOKINE_PATHWAY		21	0.415091	1.20384	0.227586	0.441154	1	1004	tags=10%, list=5%, signal=10%	NA
BIOCARTA_PGC1A_PATHWAY	BIOCARTA_PGC1A_PATHWAY		23	0.392232	1.20329	0.216152	0.439643	1	4590	tags=48%, list=21%, signal=61%	NA
REACTOME_AUTODEGRADATION_OF_THE_E3_UBIQUITIN_LIGASE_COP1	REACTOME_AUTODEGRADATION_OF_THE_E3_UBIQUITIN_LIGASE_COP1		46	0.335136	1.19997	0.154054	0.443977	1	4510	tags=48%, list=21%, signal=60%	NA
REACTOME_MRNA_CAPPING	REACTOME_MRNA_CAPPING		29	0.377193	1.19885	0.20241	0.443636	1	4230	tags=45%, list=20%, signal=56%	NA
HALLMARK_GLYCOLYSIS	HALLMARK_GLYCOLYSIS		199	0.264718	1.1979	0.0688259	0.443054	1	3633	tags=29%, list=17%, signal=34%	NA
REACTOME_SULFUR_AMINO_ACID_METABOLISM	REACTOME_SULFUR_AMINO_ACID_METABOLISM		24	0.379755	1.19685	0.229885	0.442581	1	3391	tags=46%, list=16%, signal=54%	NA
HALLMARK_HEDGEHOG_SIGNALING	HALLMARK_HEDGEHOG_SIGNALING		36	0.34698	1.1946	0.191816	0.444744	1	5396	tags=44%, list=25%, signal=59%	NA
REACTOME_PYRIMIDINE_METABOLISM	REACTOME_PYRIMIDINE_METABOLISM		23	0.380917	1.19454	0.214442	0.442229	1	3230	tags=39%, list=15%, signal=46%	NA
REACTOME_METABOLISM_OF_AMINO_ACIDS_AND_DERIVATIVES	REACTOME_METABOLISM_OF_AMINO_ACIDS_AND_DERIVATIVES		195	0.260052	1.18635	0.0809524	0.457655	1	4673	tags=35%, list=22%, signal=44%	NA
HALLMARK_UNFOLDED_PROTEIN_RESPONSE	HALLMARK_UNFOLDED_PROTEIN_RESPONSE		112	0.279546	1.18567	0.135762	0.456523	1	4316	tags=39%, list=20%, signal=49%	NA
BIOCARTA_HSP27_PATHWAY	BIOCARTA_HSP27_PATHWAY		15	0.43424	1.18513	0.258503	0.454906	1	39	tags=13%, list=0%, signal=13%	NA
WNT_SIGNALING	WNT_SIGNALING		89	0.286784	1.18321	0.176991	0.45631	1	4782	tags=31%, list=22%, signal=40%	NA
PID_NFAT_TFPATHWAY	PID_NFAT_TFPATHWAY		47	0.330042	1.18165	0.172324	0.457143	1	486	tags=13%, list=2%, signal=13%	NA
REACTOME_ACTIVATION_OF_THE_MRNA_UPON_BINDING_OF_THE_CAP_BINDING_COMPLEX_AND_EIFS_AND_SUBSEQUENT_BINDING_TO_43S	REACTOME_ACTIVATION_OF_THE_MRNA_UPON_BINDING_OF_THE_CAP_BINDING_COMPLEX_AND_EIFS_AND_SUBSEQUENT_BINDING_TO_43S		57	0.321342	1.17895	0.192612	0.460515	1	1810	tags=18%, list=8%, signal=19%	NA
NABA_SECRETED_FACTORS	NABA_SECRETED_FACTORS		343	0.24316	1.17723	0.0784314	0.461763	1	1098	tags=7%, list=5%, signal=8%	NA
KEGG_MATURITY_ONSET_DIABETES_OF_THE_YOUNG	KEGG_MATURITY_ONSET_DIABETES_OF_THE_YOUNG		25	0.384701	1.17644	0.251765	0.460945	1	8303	tags=52%, list=38%, signal=84%	NA
REACTOME_ACTIVATION_OF_BH3_ONLY_PROTEINS	REACTOME_ACTIVATION_OF_BH3_ONLY_PROTEINS		15	0.430286	1.17168	0.279343	0.468652	1	4411	tags=47%, list=20%, signal=59%	NA
BIOCARTA_MCALPAIN_PATHWAY	BIOCARTA_MCALPAIN_PATHWAY		25	0.365719	1.1706	0.229008	0.468337	1	748	tags=24%, list=3%, signal=25%	NA
PID_AVB3_OPN_PATHWAY	PID_AVB3_OPN_PATHWAY		31	0.351656	1.16756	0.226368	0.472613	1	486	tags=16%, list=2%, signal=16%	NA
ST_GA13_PATHWAY	ST_GA13_PATHWAY		37	0.342993	1.1675	0.221429	0.470101	1	1985	tags=22%, list=9%, signal=24%	NA
BIOCARTA_STRESS_PATHWAY	BIOCARTA_STRESS_PATHWAY		25	0.376417	1.16448	0.235294	0.474198	1	3822	tags=36%, list=18%, signal=44%	NA
REACTOME_PRE_NOTCH_TRANSCRIPTION_AND_TRANSLATION	REACTOME_PRE_NOTCH_TRANSCRIPTION_AND_TRANSLATION		23	0.378895	1.16141	0.24105	0.478227	1	1948	tags=30%, list=9%, signal=33%	NA
REACTOME_MITOCHONDRIAL_TRNA_AMINOACYLATION	REACTOME_MITOCHONDRIAL_TRNA_AMINOACYLATION		21	0.387719	1.16084	0.234899	0.47683	1	5913	tags=57%, list=27%, signal=79%	NA
REACTOME_RNA_POL_II_TRANSCRIPTION_PRE_INITIATION_AND_PROMOTER_OPENING	REACTOME_RNA_POL_II_TRANSCRIPTION_PRE_INITIATION_AND_PROMOTER_OPENING		40	0.337057	1.15971	0.201044	0.476675	1	4901	tags=43%, list=23%, signal=55%	NA
REACTOME_METABOLISM_OF_NUCLEOTIDES	REACTOME_METABOLISM_OF_NUCLEOTIDES		70	0.293593	1.1582	0.227528	0.477338	1	3535	tags=39%, list=16%, signal=46%	NA
HALLMARK_CHOLESTEROL_HOMEOSTASIS	HALLMARK_CHOLESTEROL_HOMEOSTASIS		73	0.29764	1.15809	0.210843	0.474986	1	2978	tags=29%, list=14%, signal=33%	NA
PID_TELOMERASE_PATHWAY	PID_TELOMERASE_PATHWAY		68	0.299681	1.15359	0.22	0.482951	1	2086	tags=25%, list=10%, signal=28%	NA
PID_S1P_META_PATHWAY	PID_S1P_META_PATHWAY		20	0.395069	1.1512	0.268132	0.485592	1	1998	tags=25%, list=9%, signal=28%	NA
PID_RHODOPSIN_PATHWAY	PID_RHODOPSIN_PATHWAY		23	0.379393	1.14999	0.27193	0.485441	1	7330	tags=48%, list=34%, signal=72%	NA
REACTOME_DOWNSTREAM_SIGNALING_EVENTS_OF_B_CELL_RECEPTOR_BCR	REACTOME_DOWNSTREAM_SIGNALING_EVENTS_OF_B_CELL_RECEPTOR_BCR		91	0.279499	1.1469	0.180328	0.489852	1	4510	tags=44%, list=21%, signal=55%	NA
BIOCARTA_DEATH_PATHWAY	BIOCARTA_DEATH_PATHWAY		33	0.343403	1.14683	0.247549	0.487415	1	265	tags=15%, list=1%, signal=15%	NA
BIOCARTA_CARM_ER_PATHWAY	BIOCARTA_CARM_ER_PATHWAY		35	0.333901	1.14669	0.260442	0.485154	1	5676	tags=54%, list=26%, signal=73%	NA
REACTOME_G1_PHASE	REACTOME_G1_PHASE		35	0.348425	1.14514	0.265664	0.486271	1	5306	tags=54%, list=25%, signal=72%	NA
REACTOME_RNA_POL_I_TRANSCRIPTION_TERMINATION	REACTOME_RNA_POL_I_TRANSCRIPTION_TERMINATION		21	0.381457	1.13938	0.276961	0.496574	1	2896	tags=38%, list=13%, signal=44%	NA
REACTOME_PROCESSIVE_SYNTHESIS_ON_THE_LAGGING_STRAND	REACTOME_PROCESSIVE_SYNTHESIS_ON_THE_LAGGING_STRAND		15	0.425162	1.1374	0.283843	0.498307	1	2897	tags=33%, list=13%, signal=38%	NA
REACTOME_TELOMERE_MAINTENANCE	REACTOME_TELOMERE_MAINTENANCE		74	0.287598	1.13652	0.200549	0.497794	1	3206	tags=27%, list=15%, signal=32%	NA
REACTOME_ACTIVATION_OF_NF_KAPPAB_IN_B_CELLS	REACTOME_ACTIVATION_OF_NF_KAPPAB_IN_B_CELLS		60	0.29871	1.13549	0.222841	0.497741	1	4510	tags=45%, list=21%, signal=57%	NA
KEGG_GLYOXYLATE_AND_DICARBOXYLATE_METABOLISM	KEGG_GLYOXYLATE_AND_DICARBOXYLATE_METABOLISM		16	0.410517	1.13345	0.293182	0.499744	1	5159	tags=50%, list=24%, signal=66%	NA
BIOCARTA_IL3_PATHWAY	BIOCARTA_IL3_PATHWAY		15	0.424534	1.13242	0.302483	0.499538	1	697	tags=27%, list=3%, signal=28%	NA
KEGG_MISMATCH_REPAIR	KEGG_MISMATCH_REPAIR		23	0.374275	1.12774	0.287671	0.507944	1	3146	tags=39%, list=15%, signal=46%	NA
REACTOME_TAK1_ACTIVATES_NFKB_BY_PHOSPHORYLATION_AND_ACTIVATION_OF_IKKS_COMPLEX	REACTOME_TAK1_ACTIVATES_NFKB_BY_PHOSPHORYLATION_AND_ACTIVATION_OF_IKKS_COMPLEX		23	0.372859	1.12752	0.304348	0.505974	1	1547	tags=22%, list=7%, signal=23%	NA
KEGG_RENIN_ANGIOTENSIN_SYSTEM	KEGG_RENIN_ANGIOTENSIN_SYSTEM		17	0.393817	1.12745	0.317241	0.503607	1	771	tags=18%, list=4%, signal=18%	NA
REACTOME_INTERACTION_BETWEEN_L1_AND_ANKYRINS	REACTOME_INTERACTION_BETWEEN_L1_AND_ANKYRINS		21	0.378798	1.12724	0.327146	0.501564	1	5454	tags=48%, list=25%, signal=64%	NA
PID_NFAT_3PATHWAY	PID_NFAT_3PATHWAY		53	0.304184	1.12412	0.263708	0.5062	1	4227	tags=42%, list=20%, signal=51%	NA
KEGG_PATHOGENIC_ESCHERICHIA_COLI_INFECTION	KEGG_PATHOGENIC_ESCHERICHIA_COLI_INFECTION		56	0.304379	1.12101	0.25	0.510588	1	3432	tags=29%, list=16%, signal=34%	NA
NABA_MATRISOME_ASSOCIATED	NABA_MATRISOME_ASSOCIATED		738	0.213783	1.12012	0.0769231	0.509861	1	1349	tags=8%, list=6%, signal=8%	NA
BIOCARTA_CELLCYCLE_PATHWAY	BIOCARTA_CELLCYCLE_PATHWAY		23	0.372554	1.1175	0.296471	0.513382	1	2078	tags=30%, list=10%, signal=34%	NA
KEGG_CYSTEINE_AND_METHIONINE_METABOLISM	KEGG_CYSTEINE_AND_METHIONINE_METABOLISM		34	0.338415	1.11678	0.312821	0.512349	1	5333	tags=44%, list=25%, signal=58%	NA
REACTOME_RNA_POL_II_TRANSCRIPTION	REACTOME_RNA_POL_II_TRANSCRIPTION		97	0.270633	1.11495	0.243986	0.513838	1	5631	tags=48%, list=26%, signal=65%	NA
BIOCARTA_MAPK_PATHWAY	BIOCARTA_MAPK_PATHWAY		87	0.274572	1.11142	0.215116	0.519473	1	4564	tags=39%, list=21%, signal=49%	NA
BIOCARTA_NO1_PATHWAY	BIOCARTA_NO1_PATHWAY		30	0.337903	1.1111	0.304245	0.517615	1	4489	tags=33%, list=21%, signal=42%	NA
REACTOME_APOPTOTIC_EXECUTION_PHASE	REACTOME_APOPTOTIC_EXECUTION_PHASE		52	0.302411	1.11019	0.252717	0.517367	1	465	tags=10%, list=2%, signal=10%	NA
KEGG_AXON_GUIDANCE	KEGG_AXON_GUIDANCE		128	0.254099	1.10914	0.225694	0.517234	1	6616	tags=46%, list=31%, signal=66%	NA
KEGG_CYTOKINE_CYTOKINE_RECEPTOR_INTERACTION	KEGG_CYTOKINE_CYTOKINE_RECEPTOR_INTERACTION		260	0.23521	1.10869	0.163366	0.515846	1	1004	tags=10%, list=5%, signal=10%	NA
REACTOME_MITOTIC_G2_G2_M_PHASES	REACTOME_MITOTIC_G2_G2_M_PHASES		79	0.272084	1.10859	0.263636	0.513687	1	3727	tags=29%, list=17%, signal=35%	NA
KEGG_ASCORBATE_AND_ALDARATE_METABOLISM	KEGG_ASCORBATE_AND_ALDARATE_METABOLISM		24	0.36414	1.1065	0.308924	0.516	1	8421	tags=75%, list=39%, signal=123%	NA
PID_TOLL_ENDOGENOUS_PATHWAY	PID_TOLL_ENDOGENOUS_PATHWAY		25	0.360202	1.10325	0.321101	0.521082	1	1820	tags=24%, list=8%, signal=26%	NA
BIOCARTA_TALL1_PATHWAY	BIOCARTA_TALL1_PATHWAY		15	0.409215	1.1003	0.345212	0.525581	1	264	tags=13%, list=1%, signal=13%	NA
PID_RAS_PATHWAY	PID_RAS_PATHWAY		30	0.340261	1.09981	0.334197	0.524376	1	614	tags=17%, list=3%, signal=17%	NA
PID_MYC_ACTIV_PATHWAY	PID_MYC_ACTIV_PATHWAY		79	0.277557	1.09975	0.262431	0.522099	1	2211	tags=24%, list=10%, signal=27%	NA
REACTOME_AMYLOIDS	REACTOME_AMYLOIDS		79	0.275803	1.09653	0.298193	0.527075	1	2585	tags=18%, list=12%, signal=20%	NA
HALLMARK_REACTIVE_OXIGEN_SPECIES_PATHWAY	HALLMARK_REACTIVE_OXIGEN_SPECIES_PATHWAY		47	0.302475	1.09467	0.305623	0.529149	1	3337	tags=38%, list=15%, signal=45%	NA
REACTOME_VIF_MEDIATED_DEGRADATION_OF_APOBEC3G	REACTOME_VIF_MEDIATED_DEGRADATION_OF_APOBEC3G		48	0.303449	1.09223	0.308943	0.532552	1	4510	tags=46%, list=21%, signal=58%	NA
KEGG_NUCLEOTIDE_EXCISION_REPAIR	KEGG_NUCLEOTIDE_EXCISION_REPAIR		44	0.307596	1.09105	0.31694	0.532702	1	3099	tags=32%, list=14%, signal=37%	NA
REACTOME_IL1_SIGNALING	REACTOME_IL1_SIGNALING		39	0.312403	1.08624	0.336043	0.541282	1	4681	tags=36%, list=22%, signal=46%	NA
REACTOME_GLUTATHIONE_CONJUGATION	REACTOME_GLUTATHIONE_CONJUGATION		23	0.352188	1.0819	0.35446	0.548883	1	3675	tags=30%, list=17%, signal=37%	NA
REACTOME_MITOTIC_PROMETAPHASE	REACTOME_MITOTIC_PROMETAPHASE		84	0.26755	1.08136	0.291667	0.547751	1	2686	tags=25%, list=12%, signal=28%	NA
HALLMARK_KRAS_SIGNALING_UP	HALLMARK_KRAS_SIGNALING_UP		198	0.237473	1.0805	0.236	0.547331	1	1225	tags=12%, list=6%, signal=12%	NA
HALLMARK_NOTCH_SIGNALING	HALLMARK_NOTCH_SIGNALING		32	0.327948	1.07772	0.342169	0.551414	1	4006	tags=44%, list=18%, signal=54%	NA
REACTOME_TRANSLATION	REACTOME_TRANSLATION		150	0.24383	1.07296	0.266904	0.560403	1	1863	tags=13%, list=9%, signal=14%	NA
PID_CERAMIDE_PATHWAY	PID_CERAMIDE_PATHWAY		48	0.295053	1.07281	0.3325	0.558306	1	1639	tags=17%, list=8%, signal=18%	NA
REACTOME_INHIBITION_OF_THE_PROTEOLYTIC_ACTIVITY_OF_APC_C_REQUIRED_FOR_THE_ONSET_OF_ANAPHASE_BY_MITOTIC_SPINDLE_CHECKPOINT_COMPONENTS	REACTOME_INHIBITION_OF_THE_PROTEOLYTIC_ACTIVITY_OF_APC_C_REQUIRED_FOR_THE_ONSET_OF_ANAPHASE_BY_MITOTIC_SPINDLE_CHECKPOINT_COMPONENTS		18	0.376772	1.07134	0.347458	0.559345	1	5768	tags=56%, list=27%, signal=76%	NA
REACTOME_TRANSPORT_OF_INORGANIC_CATIONS_ANIONS_AND_AMINO_ACIDS_OLIGOPEPTIDES	REACTOME_TRANSPORT_OF_INORGANIC_CATIONS_ANIONS_AND_AMINO_ACIDS_OLIGOPEPTIDES		91	0.263085	1.06824	0.301493	0.564287	1	2348	tags=18%, list=11%, signal=20%	NA
KEGG_WNT_SIGNALING_PATHWAY	KEGG_WNT_SIGNALING_PATHWAY		149	0.243882	1.06699	0.317241	0.564729	1	4610	tags=34%, list=21%, signal=43%	NA
PID_PS1_PATHWAY	PID_PS1_PATHWAY		46	0.297611	1.06669	0.322493	0.563038	1	4111	tags=37%, list=19%, signal=46%	NA
NABA_PROTEOGLYCANS	NABA_PROTEOGLYCANS		35	0.310074	1.06115	0.343358	0.574021	1	302	tags=6%, list=1%, signal=6%	NA
REACTOME_GLOBAL_GENOMIC_NER_GG_NER	REACTOME_GLOBAL_GENOMIC_NER_GG_NER		33	0.321466	1.05666	0.370466	0.582432	1	3099	tags=33%, list=14%, signal=39%	NA
REACTOME_SRP_DEPENDENT_COTRANSLATIONAL_PROTEIN_TARGETING_TO_MEMBRANE	REACTOME_SRP_DEPENDENT_COTRANSLATIONAL_PROTEIN_TARGETING_TO_MEMBRANE		112	0.25078	1.05633	0.336667	0.580741	1	1863	tags=12%, list=9%, signal=13%	NA
REACTOME_TRANSCRIPTION	REACTOME_TRANSCRIPTION		198	0.228036	1.05389	0.297414	0.584196	1	4369	tags=32%, list=20%, signal=40%	NA
PID_ANTHRAX_PATHWAY	PID_ANTHRAX_PATHWAY		17	0.37487	1.0486	0.408791	0.59404	1	4270	tags=53%, list=20%, signal=66%	NA
NABA_BASEMENT_MEMBRANES	NABA_BASEMENT_MEMBRANES		40	0.296725	1.04786	0.370844	0.5933	1	514	tags=8%, list=2%, signal=8%	NA
ST_TUMOR_NECROSIS_FACTOR_PATHWAY	ST_TUMOR_NECROSIS_FACTOR_PATHWAY		29	0.322456	1.04761	0.373464	0.591442	1	1722	tags=21%, list=8%, signal=22%	NA
KEGG_OOCYTE_MEIOSIS	KEGG_OOCYTE_MEIOSIS		111	0.246128	1.04624	0.360825	0.59243	1	5035	tags=37%, list=23%, signal=48%	NA
REACTOME_OTHER_SEMAPHORIN_INTERACTIONS	REACTOME_OTHER_SEMAPHORIN_INTERACTIONS		15	0.383127	1.04516	0.419501	0.592747	1	1247	tags=20%, list=6%, signal=21%	NA
REACTOME_RNA_POL_I_RNA_POL_III_AND_MITOCHONDRIAL_TRANSCRIPTION	REACTOME_RNA_POL_I_RNA_POL_III_AND_MITOCHONDRIAL_TRANSCRIPTION		117	0.244506	1.04316	0.389892	0.595284	1	3094	tags=25%, list=14%, signal=29%	NA
BIOCARTA_MAL_PATHWAY	BIOCARTA_MAL_PATHWAY		19	0.363172	1.04209	0.399533	0.595336	1	4665	tags=47%, list=22%, signal=60%	NA
REACTOME_PROCESSING_OF_CAPPED_INTRONLESS_PRE_MRNA	REACTOME_PROCESSING_OF_CAPPED_INTRONLESS_PRE_MRNA		23	0.332291	1.03835	0.381375	0.601978	1	6126	tags=74%, list=28%, signal=103%	NA
REACTOME_TRNA_AMINOACYLATION	REACTOME_TRNA_AMINOACYLATION		42	0.296214	1.03815	0.398496	0.600063	1	5913	tags=55%, list=27%, signal=75%	NA
REACTOME_METABOLISM_OF_PROTEINS	REACTOME_METABOLISM_OF_PROTEINS		424	0.210111	1.03814	0.291045	0.597686	1	4328	tags=26%, list=20%, signal=32%	NA
REACTOME_MAP_KINASE_ACTIVATION_IN_TLR_CASCADE	REACTOME_MAP_KINASE_ACTIVATION_IN_TLR_CASCADE		49	0.281541	1.03708	0.393064	0.598072	1	4681	tags=45%, list=22%, signal=57%	NA
KEGG_THYROID_CANCER	KEGG_THYROID_CANCER		29	0.314347	1.03641	0.39372	0.597371	1	4564	tags=41%, list=21%, signal=52%	NA
REACTOME_CHROMOSOME_MAINTENANCE	REACTOME_CHROMOSOME_MAINTENANCE		118	0.243468	1.03613	0.353135	0.595645	1	2961	tags=23%, list=14%, signal=26%	NA
REACTOME_NFKB_AND_MAP_KINASES_ACTIVATION_MEDIATED_BY_TLR4_SIGNALING_REPERTOIRE	REACTOME_NFKB_AND_MAP_KINASES_ACTIVATION_MEDIATED_BY_TLR4_SIGNALING_REPERTOIRE		70	0.260193	1.03305	0.358491	0.600696	1	4681	tags=40%, list=22%, signal=51%	NA
REACTOME_PD1_SIGNALING	REACTOME_PD1_SIGNALING		16	0.368475	1.03258	0.403118	0.599371	1	6853	tags=56%, list=32%, signal=82%	NA
BIOCARTA_SHH_PATHWAY	BIOCARTA_SHH_PATHWAY		16	0.376798	1.03219	0.413333	0.59797	1	4003	tags=44%, list=18%, signal=54%	NA
BIOCARTA_BARRESTIN_SRC_PATHWAY	BIOCARTA_BARRESTIN_SRC_PATHWAY		15	0.378035	1.03015	0.403628	0.600201	1	4270	tags=40%, list=20%, signal=50%	NA
PID_HIV_NEF_PATHWAY	PID_HIV_NEF_PATHWAY		35	0.297515	1.0272	0.411311	0.604943	1	3937	tags=31%, list=18%, signal=38%	NA
REACTOME_RNA_POL_I_TRANSCRIPTION_INITIATION	REACTOME_RNA_POL_I_TRANSCRIPTION_INITIATION		24	0.339746	1.02644	0.454106	0.604356	1	2896	tags=38%, list=13%, signal=43%	NA
REACTOME_SYNTHESIS_SECRETION_AND_DEACYLATION_OF_GHRELIN	REACTOME_SYNTHESIS_SECRETION_AND_DEACYLATION_OF_GHRELIN		15	0.370748	1.02526	0.421875	0.604854	1	41	tags=7%, list=0%, signal=7%	NA
REACTOME_SEMAPHORIN_INTERACTIONS	REACTOME_SEMAPHORIN_INTERACTIONS		66	0.264636	1.02427	0.4	0.605002	1	2510	tags=20%, list=12%, signal=22%	NA
REACTOME_P53_DEPENDENT_G1_DNA_DAMAGE_RESPONSE	REACTOME_P53_DEPENDENT_G1_DNA_DAMAGE_RESPONSE		52	0.279878	1.02227	0.40113	0.607543	1	4510	tags=46%, list=21%, signal=58%	NA
PID_NETRIN_PATHWAY	PID_NETRIN_PATHWAY		32	0.30386	1.01958	0.430318	0.611578	1	5387	tags=50%, list=25%, signal=66%	NA
KEGG_AMINOACYL_TRNA_BIOSYNTHESIS	KEGG_AMINOACYL_TRNA_BIOSYNTHESIS		41	0.292926	1.01937	0.407595	0.609701	1	5913	tags=54%, list=27%, signal=74%	NA
REACTOME_FGFR_LIGAND_BINDING_AND_ACTIVATION	REACTOME_FGFR_LIGAND_BINDING_AND_ACTIVATION		22	0.332188	1.01699	0.439024	0.612986	1	5624	tags=32%, list=26%, signal=43%	NA
BIOCARTA_ATRBRCA_PATHWAY	BIOCARTA_ATRBRCA_PATHWAY		21	0.348093	1.01493	0.451467	0.615613	1	1306	tags=29%, list=6%, signal=30%	NA
KEGG_GLYCINE_SERINE_AND_THREONINE_METABOLISM	KEGG_GLYCINE_SERINE_AND_THREONINE_METABOLISM		31	0.310073	1.01151	0.443645	0.621323	1	1759	tags=23%, list=8%, signal=25%	NA
PID_S1P_S1P3_PATHWAY	PID_S1P_S1P3_PATHWAY		28	0.317833	1.00914	0.43287	0.624976	1	2345	tags=21%, list=11%, signal=24%	NA
REACTOME_ACETYLCHOLINE_BINDING_AND_DOWNSTREAM_EVENTS	REACTOME_ACETYLCHOLINE_BINDING_AND_DOWNSTREAM_EVENTS		15	0.367584	1.0086	0.455696	0.624055	1	7777	tags=60%, list=36%, signal=94%	NA
PID_FGF_PATHWAY	PID_FGF_PATHWAY		55	0.267418	1.00729	0.438503	0.624923	1	1321	tags=15%, list=6%, signal=15%	NA
PID_LIS1_PATHWAY	PID_LIS1_PATHWAY		28	0.31398	1.00711	0.454545	0.623032	1	5039	tags=50%, list=23%, signal=65%	NA
PID_INTEGRIN3_PATHWAY	PID_INTEGRIN3_PATHWAY		41	0.284127	1.00541	0.456693	0.624876	1	711	tags=12%, list=3%, signal=13%	NA
REACTOME_REGULATION_OF_GLUCOKINASE_BY_GLUCOKINASE_REGULATORY_PROTEIN	REACTOME_REGULATION_OF_GLUCOKINASE_BY_GLUCOKINASE_REGULATORY_PROTEIN		27	0.318435	1.00402	0.434884	0.625752	1	3922	tags=48%, list=18%, signal=59%	NA
REACTOME_OLFACTORY_SIGNALING_PATHWAY	REACTOME_OLFACTORY_SIGNALING_PATHWAY		320	0.205317	1.00309	0.397661	0.625875	1	16806	tags=99%, list=78%, signal=436%	NA
REACTOME_MUSCLE_CONTRACTION	REACTOME_MUSCLE_CONTRACTION		47	0.280328	1.00053	0.468144	0.62951	1	820	tags=6%, list=4%, signal=7%	NA
PID_WNT_SIGNALING_PATHWAY	PID_WNT_SIGNALING_PATHWAY		28	0.310136	1.00021	0.477435	0.627952	1	1667	tags=18%, list=8%, signal=19%	NA
SIG_CD40PATHWAYMAP	SIG_CD40PATHWAYMAP		34	0.292197	0.997112	0.437799	0.633139	1	5056	tags=41%, list=23%, signal=54%	NA
BIOCARTA_TEL_PATHWAY	BIOCARTA_TEL_PATHWAY		18	0.357598	0.996745	0.448193	0.631679	1	6071	tags=56%, list=28%, signal=77%	NA
REACTOME_FANCONI_ANEMIA_PATHWAY	REACTOME_FANCONI_ANEMIA_PATHWAY		21	0.333292	0.996392	0.45045	0.630222	1	1306	tags=24%, list=6%, signal=25%	NA
KEGG_PYRUVATE_METABOLISM	KEGG_PYRUVATE_METABOLISM		38	0.295382	0.996306	0.478589	0.628126	1	1766	tags=18%, list=8%, signal=20%	NA
REACTOME_ABC_FAMILY_PROTEINS_MEDIATED_TRANSPORT	REACTOME_ABC_FAMILY_PROTEINS_MEDIATED_TRANSPORT		33	0.300312	0.995354	0.46798	0.628113	1	6285	tags=45%, list=29%, signal=64%	NA
KEGG_SYSTEMIC_LUPUS_ERYTHEMATOSUS	KEGG_SYSTEMIC_LUPUS_ERYTHEMATOSUS		130	0.227887	0.99364	0.472727	0.63002	1	98	tags=4%, list=0%, signal=4%	NA
REACTOME_INTERACTIONS_OF_VPR_WITH_HOST_CELLULAR_PROTEINS	REACTOME_INTERACTIONS_OF_VPR_WITH_HOST_CELLULAR_PROTEINS		32	0.305357	0.990606	0.465686	0.634848	1	3922	tags=44%, list=18%, signal=53%	NA
KEGG_HEDGEHOG_SIGNALING_PATHWAY	KEGG_HEDGEHOG_SIGNALING_PATHWAY		56	0.261567	0.990528	0.453521	0.632774	1	1734	tags=14%, list=8%, signal=15%	NA
REACTOME_METABOLISM_OF_VITAMINS_AND_COFACTORS	REACTOME_METABOLISM_OF_VITAMINS_AND_COFACTORS		51	0.264415	0.984039	0.515873	0.645675	1	3236	tags=24%, list=15%, signal=28%	NA
REACTOME_NEF_MEDIATES_DOWN_MODULATION_OF_CELL_SURFACE_RECEPTORS_BY_RECRUITING_THEM_TO_CLATHRIN_ADAPTERS	REACTOME_NEF_MEDIATES_DOWN_MODULATION_OF_CELL_SURFACE_RECEPTORS_BY_RECRUITING_THEM_TO_CLATHRIN_ADAPTERS		20	0.344465	0.983554	0.490153	0.644524	1	6530	tags=55%, list=30%, signal=79%	NA
KEGG_ARGININE_AND_PROLINE_METABOLISM	KEGG_ARGININE_AND_PROLINE_METABOLISM		53	0.265406	0.981818	0.453634	0.646391	1	6305	tags=45%, list=29%, signal=64%	NA
REACTOME_INFLAMMASOMES	REACTOME_INFLAMMASOMES		16	0.355827	0.979404	0.485232	0.649747	1	2341	tags=38%, list=11%, signal=42%	NA
KEGG_DRUG_METABOLISM_OTHER_ENZYMES	KEGG_DRUG_METABOLISM_OTHER_ENZYMES		50	0.264109	0.979011	0.485714	0.64836	1	8421	tags=66%, list=39%, signal=108%	NA
BIOCARTA_PROTEASOME_PATHWAY	BIOCARTA_PROTEASOME_PATHWAY		28	0.30947	0.97845	0.490698	0.647334	1	4510	tags=39%, list=21%, signal=50%	NA
REACTOME_EFFECTS_OF_PIP2_HYDROLYSIS	REACTOME_EFFECTS_OF_PIP2_HYDROLYSIS		23	0.320768	0.978435	0.508121	0.645143	1	3533	tags=30%, list=16%, signal=36%	NA
REACTOME_DEADENYLATION_DEPENDENT_MRNA_DECAY	REACTOME_DEADENYLATION_DEPENDENT_MRNA_DECAY		43	0.273792	0.975769	0.490566	0.64915	1	4316	tags=40%, list=20%, signal=49%	NA
KEGG_PRION_DISEASES	KEGG_PRION_DISEASES		35	0.286211	0.975692	0.511574	0.647118	1	5597	tags=46%, list=26%, signal=62%	NA
HALLMARK_APICAL_SURFACE	HALLMARK_APICAL_SURFACE		44	0.27256	0.969967	0.475066	0.658222	1	1156	tags=16%, list=5%, signal=17%	NA
BIOCARTA_EPO_PATHWAY	BIOCARTA_EPO_PATHWAY		19	0.334754	0.966781	0.502439	0.663535	1	486	tags=16%, list=2%, signal=16%	NA
PID_FANCONI_PATHWAY	PID_FANCONI_PATHWAY		47	0.269515	0.96562	0.527705	0.663893	1	1558	tags=21%, list=7%, signal=23%	NA
BIOCARTA_WNT_PATHWAY	BIOCARTA_WNT_PATHWAY		26	0.306899	0.964654	0.518337	0.663903	1	4564	tags=42%, list=21%, signal=54%	NA
REACTOME_APC_CDC20_MEDIATED_DEGRADATION_OF_NEK2A	REACTOME_APC_CDC20_MEDIATED_DEGRADATION_OF_NEK2A		21	0.327217	0.957496	0.518779	0.67833	1	5768	tags=52%, list=27%, signal=71%	NA
KEGG_GLYCOSAMINOGLYCAN_DEGRADATION	KEGG_GLYCOSAMINOGLYCAN_DEGRADATION		21	0.32012	0.955432	0.498929	0.680863	1	2820	tags=33%, list=13%, signal=38%	NA
BIOCARTA_IL6_PATHWAY	BIOCARTA_IL6_PATHWAY		22	0.317051	0.953317	0.534404	0.683677	1	486	tags=18%, list=2%, signal=19%	NA
BIOCARTA_PML_PATHWAY	BIOCARTA_PML_PATHWAY		17	0.343107	0.94938	0.537585	0.69051	1	3618	tags=47%, list=17%, signal=56%	NA
BIOCARTA_IL2_PATHWAY	BIOCARTA_IL2_PATHWAY		22	0.314253	0.94527	0.528708	0.697921	1	785	tags=18%, list=4%, signal=19%	NA
KEGG_DRUG_METABOLISM_CYTOCHROME_P450	KEGG_DRUG_METABOLISM_CYTOCHROME_P450		71	0.237909	0.944872	0.542274	0.696559	1	8421	tags=52%, list=39%, signal=85%	NA
BIOCARTA_IL10_PATHWAY	BIOCARTA_IL10_PATHWAY		17	0.345158	0.944568	0.54013	0.694943	1	365	tags=12%, list=2%, signal=12%	NA
REACTOME_TRANSPORT_OF_VITAMINS_NUCLEOSIDES_AND_RELATED_MOLECULES	REACTOME_TRANSPORT_OF_VITAMINS_NUCLEOSIDES_AND_RELATED_MOLECULES		31	0.29028	0.942393	0.542199	0.697679	1	2944	tags=29%, list=14%, signal=34%	NA
REACTOME_METAL_ION_SLC_TRANSPORTERS	REACTOME_METAL_ION_SLC_TRANSPORTERS		22	0.311304	0.940645	0.544392	0.699551	1	2868	tags=32%, list=13%, signal=37%	NA
PID_ARF6_PATHWAY	PID_ARF6_PATHWAY		35	0.279289	0.937848	0.536341	0.703507	1	1913	tags=20%, list=9%, signal=22%	NA
BIOCARTA_RACCYCD_PATHWAY	BIOCARTA_RACCYCD_PATHWAY		26	0.30206	0.937322	0.563549	0.702363	1	823	tags=19%, list=4%, signal=20%	NA
REACTOME_TRANSPORT_OF_RIBONUCLEOPROTEINS_INTO_THE_HOST_NUCLEUS	REACTOME_TRANSPORT_OF_RIBONUCLEOPROTEINS_INTO_THE_HOST_NUCLEUS		27	0.303628	0.935999	0.570025	0.703194	1	3922	tags=48%, list=18%, signal=59%	NA
BIOCARTA_NFKB_PATHWAY	BIOCARTA_NFKB_PATHWAY		23	0.311282	0.934774	0.540598	0.703888	1	242	tags=9%, list=1%, signal=9%	NA
REACTOME_PKB_MEDIATED_EVENTS	REACTOME_PKB_MEDIATED_EVENTS		28	0.294588	0.933634	0.567633	0.704111	1	4254	tags=39%, list=20%, signal=49%	NA
KEGG_BASAL_CELL_CARCINOMA	KEGG_BASAL_CELL_CARCINOMA		55	0.24999	0.932969	0.576142	0.703399	1	4411	tags=27%, list=20%, signal=34%	NA
HALLMARK_PANCREAS_BETA_CELLS	HALLMARK_PANCREAS_BETA_CELLS		40	0.266355	0.929621	0.564165	0.708698	1	7926	tags=55%, list=37%, signal=87%	NA
PID_RAC1_REG_PATHWAY	PID_RAC1_REG_PATHWAY		38	0.267948	0.924855	0.583333	0.717263	1	4872	tags=42%, list=22%, signal=54%	NA
PID_CIRCADIAN_PATHWAY	PID_CIRCADIAN_PATHWAY		16	0.330474	0.921226	0.573171	0.723152	1	2521	tags=25%, list=12%, signal=28%	NA
PID_S1P_S1P2_PATHWAY	PID_S1P_S1P2_PATHWAY		23	0.300782	0.920783	0.583127	0.721808	1	1998	tags=22%, list=9%, signal=24%	NA
REACTOME_ASSOCIATION_OF_TRIC_CCT_WITH_TARGET_PROTEINS_DURING_BIOSYNTHESIS	REACTOME_ASSOCIATION_OF_TRIC_CCT_WITH_TARGET_PROTEINS_DURING_BIOSYNTHESIS		26	0.296058	0.917248	0.60514	0.727349	1	5426	tags=54%, list=25%, signal=72%	NA
REACTOME_JNK_C_JUN_KINASES_PHOSPHORYLATION_AND_ACTIVATION_MEDIATED_BY_ACTIVATED_HUMAN_TAK1	REACTOME_JNK_C_JUN_KINASES_PHOSPHORYLATION_AND_ACTIVATION_MEDIATED_BY_ACTIVATED_HUMAN_TAK1		16	0.345419	0.916954	0.573363	0.72567	1	4681	tags=44%, list=22%, signal=56%	NA
PID_IL12_STAT4_PATHWAY	PID_IL12_STAT4_PATHWAY		32	0.28034	0.916416	0.606061	0.724643	1	2544	tags=22%, list=12%, signal=25%	NA
KEGG_TYROSINE_METABOLISM	KEGG_TYROSINE_METABOLISM		42	0.262077	0.91559	0.623077	0.724185	1	5282	tags=43%, list=24%, signal=57%	NA
PID_CD8_TCR_DOWNSTREAM_PATHWAY	PID_CD8_TCR_DOWNSTREAM_PATHWAY		65	0.237676	0.908666	0.635593	0.736893	1	1239	tags=9%, list=6%, signal=10%	NA
BIOCARTA_HIF_PATHWAY	BIOCARTA_HIF_PATHWAY		15	0.334031	0.907649	0.586956	0.73682	1	2012	tags=27%, list=9%, signal=29%	NA
BIOCARTA_TNFR2_PATHWAY	BIOCARTA_TNFR2_PATHWAY		18	0.315712	0.907552	0.614155	0.734742	1	5056	tags=39%, list=23%, signal=51%	NA
ST_GAQ_PATHWAY	ST_GAQ_PATHWAY		28	0.281889	0.905179	0.61244	0.737401	1	2116	tags=25%, list=10%, signal=28%	NA
REACTOME_APC_C_CDC20_MEDIATED_DEGRADATION_OF_CYCLIN_B	REACTOME_APC_C_CDC20_MEDIATED_DEGRADATION_OF_CYCLIN_B		19	0.309454	0.902405	0.61987	0.741024	1	5500	tags=47%, list=25%, signal=63%	NA
REACTOME_POST_TRANSLATIONAL_MODIFICATION_SYNTHESIS_OF_GPI_ANCHORED_PROTEINS	REACTOME_POST_TRANSLATIONAL_MODIFICATION_SYNTHESIS_OF_GPI_ANCHORED_PROTEINS		26	0.290024	0.902273	0.614319	0.739003	1	3670	tags=27%, list=17%, signal=32%	NA
REACTOME_FORMATION_OF_INCISION_COMPLEX_IN_GG_NER	REACTOME_FORMATION_OF_INCISION_COMPLEX_IN_GG_NER		21	0.308871	0.898776	0.596372	0.74431	1	3099	tags=33%, list=14%, signal=39%	NA
REACTOME_STEROID_HORMONES	REACTOME_STEROID_HORMONES		28	0.274235	0.897563	0.59854	0.744585	1	958	tags=11%, list=4%, signal=11%	NA
REACTOME_DARPP_32_EVENTS	REACTOME_DARPP_32_EVENTS		24	0.293233	0.895348	0.627359	0.747013	1	6389	tags=67%, list=30%, signal=94%	NA
REACTOME_FRS2_MEDIATED_CASCADE	REACTOME_FRS2_MEDIATED_CASCADE		36	0.261944	0.89077	0.619165	0.754314	1	5624	tags=33%, list=26%, signal=45%	NA
REACTOME_IRON_UPTAKE_AND_TRANSPORT	REACTOME_IRON_UPTAKE_AND_TRANSPORT		36	0.260907	0.88963	0.64	0.754443	1	2458	tags=19%, list=11%, signal=22%	NA
PID_ARF6_DOWNSTREAM_PATHWAY	PID_ARF6_DOWNSTREAM_PATHWAY		15	0.335512	0.888005	0.583153	0.75562	1	5309	tags=47%, list=25%, signal=62%	NA
PID_PLK1_PATHWAY	PID_PLK1_PATHWAY		46	0.245215	0.883929	0.675	0.76173	1	4964	tags=35%, list=23%, signal=45%	NA
REACTOME_SYNTHESIS_OF_GLYCOSYLPHOSPHATIDYLINOSITOL_GPI	REACTOME_SYNTHESIS_OF_GLYCOSYLPHOSPHATIDYLINOSITOL_GPI		17	0.314598	0.879864	0.641084	0.767952	1	3670	tags=29%, list=17%, signal=35%	NA
BIOCARTA_FMLP_PATHWAY	BIOCARTA_FMLP_PATHWAY		36	0.264218	0.879575	0.664286	0.766216	1	5234	tags=44%, list=24%, signal=59%	NA
REACTOME_CONVERSION_FROM_APC_C_CDC20_TO_APC_C_CDH1_IN_LATE_ANAPHASE	REACTOME_CONVERSION_FROM_APC_C_CDC20_TO_APC_C_CDH1_IN_LATE_ANAPHASE		16	0.323908	0.879236	0.625835	0.764611	1	5500	tags=50%, list=25%, signal=67%	NA
REACTOME_PHOSPHORYLATION_OF_THE_APC_C	REACTOME_PHOSPHORYLATION_OF_THE_APC_C		17	0.318144	0.876574	0.641892	0.767706	1	5500	tags=47%, list=25%, signal=63%	NA
REACTOME_SHC_MEDIATED_CASCADE	REACTOME_SHC_MEDIATED_CASCADE		28	0.275619	0.874645	0.626214	0.769271	1	341	tags=7%, list=2%, signal=7%	NA
REACTOME_NITRIC_OXIDE_STIMULATES_GUANYLATE_CYCLASE	REACTOME_NITRIC_OXIDE_STIMULATES_GUANYLATE_CYCLASE		25	0.277335	0.872557	0.666667	0.771292	1	10346	tags=68%, list=48%, signal=130%	NA
SA_B_CELL_RECEPTOR_COMPLEXES	SA_B_CELL_RECEPTOR_COMPLEXES		24	0.2831	0.870063	0.63357	0.773819	1	709	tags=17%, list=3%, signal=17%	NA
KEGG_PANTOTHENATE_AND_COA_BIOSYNTHESIS	KEGG_PANTOTHENATE_AND_COA_BIOSYNTHESIS		16	0.307725	0.865819	0.647887	0.779895	1	2688	tags=31%, list=12%, signal=36%	NA
BIOCARTA_MEF2D_PATHWAY	BIOCARTA_MEF2D_PATHWAY		18	0.299381	0.865405	0.657343	0.778468	1	6343	tags=56%, list=29%, signal=79%	NA
KEGG_OLFACTORY_TRANSDUCTION	KEGG_OLFACTORY_TRANSDUCTION		384	0.176432	0.865288	0.940397	0.776402	1	11754	tags=55%, list=54%, signal=117%	NA
REACTOME_GABA_SYNTHESIS_RELEASE_REUPTAKE_AND_DEGRADATION	REACTOME_GABA_SYNTHESIS_RELEASE_REUPTAKE_AND_DEGRADATION		17	0.304315	0.859295	0.656716	0.785672	1	6095	tags=41%, list=28%, signal=57%	NA
BIOCARTA_HDAC_PATHWAY	BIOCARTA_HDAC_PATHWAY		29	0.267792	0.84841	0.67561	0.803634	1	4806	tags=45%, list=22%, signal=58%	NA
PID_ARF_3PATHWAY	PID_ARF_3PATHWAY		19	0.286758	0.847038	0.655983	0.803775	1	4526	tags=42%, list=21%, signal=53%	NA
KEGG_NITROGEN_METABOLISM	KEGG_NITROGEN_METABOLISM		23	0.279309	0.847003	0.683721	0.801514	1	6075	tags=43%, list=28%, signal=60%	NA
BIOCARTA_CHREBP2_PATHWAY	BIOCARTA_CHREBP2_PATHWAY		42	0.239766	0.8442	0.7543	0.804353	1	5073	tags=40%, list=23%, signal=53%	NA
REACTOME_PYRUVATE_METABOLISM	REACTOME_PYRUVATE_METABOLISM		18	0.293912	0.843421	0.691964	0.803412	1	2043	tags=22%, list=9%, signal=25%	NA
PID_MYC_PATHWAY	PID_MYC_PATHWAY		25	0.275132	0.8394	0.688222	0.80839	1	6086	tags=52%, list=28%, signal=72%	NA
BIOCARTA_CERAMIDE_PATHWAY	BIOCARTA_CERAMIDE_PATHWAY		22	0.274539	0.834378	0.737819	0.815066	1	4111	tags=32%, list=19%, signal=39%	NA
REACTOME_TERMINATION_OF_O_GLYCAN_BIOSYNTHESIS	REACTOME_TERMINATION_OF_O_GLYCAN_BIOSYNTHESIS		19	0.291319	0.834048	0.712719	0.813296	1	770	tags=11%, list=4%, signal=11%	NA
PID_HEDGEHOG_2PATHWAY	PID_HEDGEHOG_2PATHWAY		22	0.272736	0.830311	0.714286	0.817346	1	4003	tags=27%, list=18%, signal=33%	NA
BIOCARTA_CK1_PATHWAY	BIOCARTA_CK1_PATHWAY		17	0.294402	0.822335	0.723629	0.82852	1	3024	tags=29%, list=14%, signal=34%	NA
KEGG_ONE_CARBON_POOL_BY_FOLATE	KEGG_ONE_CARBON_POOL_BY_FOLATE		17	0.282148	0.814642	0.72479	0.838962	1	995	tags=18%, list=5%, signal=18%	NA
REACTOME_LIPID_DIGESTION_MOBILIZATION_AND_TRANSPORT	REACTOME_LIPID_DIGESTION_MOBILIZATION_AND_TRANSPORT		44	0.224522	0.790854	0.828571	0.873295	1	4157	tags=25%, list=19%, signal=31%	NA
PID_DNA_PK_PATHWAY	PID_DNA_PK_PATHWAY		16	0.282884	0.788748	0.781106	0.873923	1	4098	tags=44%, list=19%, signal=54%	NA
REACTOME_METABOLISM_OF_STEROID_HORMONES_AND_VITAMINS_A_AND_D	REACTOME_METABOLISM_OF_STEROID_HORMONES_AND_VITAMINS_A_AND_D		34	0.239286	0.787509	0.809069	0.873241	1	958	tags=9%, list=4%, signal=9%	NA
BIOCARTA_IL17_PATHWAY	BIOCARTA_IL17_PATHWAY		15	0.285475	0.778833	0.731707	0.883176	1	5226	tags=33%, list=24%, signal=44%	NA
SA_G1_AND_S_PHASES	SA_G1_AND_S_PHASES		15	0.286707	0.777138	0.775	0.882934	1	2078	tags=27%, list=10%, signal=29%	NA
PID_LPA4_PATHWAY	PID_LPA4_PATHWAY		15	0.287861	0.774439	0.785877	0.884106	1	1629	tags=13%, list=8%, signal=14%	NA
REACTOME_CTNNB1_PHOSPHORYLATION_CASCADE	REACTOME_CTNNB1_PHOSPHORYLATION_CASCADE		15	0.29099	0.767724	0.784483	0.890613	1	4560	tags=40%, list=21%, signal=51%	NA
REACTOME_DESTABILIZATION_OF_MRNA_BY_KSRP	REACTOME_DESTABILIZATION_OF_MRNA_BY_KSRP		17	0.272596	0.754897	0.773333	0.904209	1	3034	tags=29%, list=14%, signal=34%	NA
BIOCARTA_PITX2_PATHWAY	BIOCARTA_PITX2_PATHWAY		15	0.271426	0.744386	0.830472	0.914023	1	6343	tags=53%, list=29%, signal=75%	NA
REACTOME_GLYCOLYSIS	REACTOME_GLYCOLYSIS		27	0.231623	0.738097	0.884977	0.918487	1	4560	tags=33%, list=21%, signal=42%	NA
REACTOME_ENOS_ACTIVATION_AND_REGULATION	REACTOME_ENOS_ACTIVATION_AND_REGULATION		20	0.255115	0.737881	0.806604	0.916236	1	4489	tags=40%, list=21%, signal=50%	NA
REACTOME_XENOBIOTICS	REACTOME_XENOBIOTICS		15	0.265938	0.723049	0.844492	0.929128	1	8138	tags=60%, list=38%, signal=96%	NA
REACTOME_AMINE_LIGAND_BINDING_RECEPTORS	REACTOME_AMINE_LIGAND_BINDING_RECEPTORS		37	0.205674	0.714119	0.92439	0.935356	1	65	tags=3%, list=0%, signal=3%	NA
REACTOME_REGULATION_OF_GENE_EXPRESSION_IN_BETA_CELLS	REACTOME_REGULATION_OF_GENE_EXPRESSION_IN_BETA_CELLS		20	0.244156	0.710932	0.897275	0.935734	1	8303	tags=50%, list=38%, signal=81%	NA
REACTOME_REGULATION_OF_BETA_CELL_DEVELOPMENT	REACTOME_REGULATION_OF_BETA_CELL_DEVELOPMENT		30	0.21768	0.705853	0.898765	0.93755	1	8303	tags=43%, list=38%, signal=70%	NA
KEGG_PRIMARY_BILE_ACID_BIOSYNTHESIS	KEGG_PRIMARY_BILE_ACID_BIOSYNTHESIS		16	0.249215	0.698356	0.883146	0.941329	1	7711	tags=56%, list=36%, signal=87%	NA
REACTOME_CTLA4_INHIBITORY_SIGNALING	REACTOME_CTLA4_INHIBITORY_SIGNALING		21	0.233934	0.691904	0.891156	0.94411	1	6389	tags=48%, list=30%, signal=67%	NA
REACTOME_AMINE_DERIVED_HORMONES	REACTOME_AMINE_DERIVED_HORMONES		15	0.257045	0.691814	0.868597	0.941653	1	8994	tags=60%, list=42%, signal=103%	NA
REACTOME_NEGATIVE_REGULATION_OF_FGFR_SIGNALING	REACTOME_NEGATIVE_REGULATION_OF_FGFR_SIGNALING		36	0.204609	0.683967	0.930394	0.945066	1	6435	tags=42%, list=30%, signal=59%	NA
REACTOME_CGMP_EFFECTS	REACTOME_CGMP_EFFECTS		19	0.236715	0.682012	0.899767	0.944036	1	10346	tags=68%, list=48%, signal=131%	NA
REACTOME_SYNTHESIS_OF_BILE_ACIDS_AND_BILE_SALTS	REACTOME_SYNTHESIS_OF_BILE_ACIDS_AND_BILE_SALTS		19	0.221472	0.653469	0.897129	0.960639	1	7711	tags=53%, list=36%, signal=82%	NA
REACTOME_CHYLOMICRON_MEDIATED_LIPID_TRANSPORT	REACTOME_CHYLOMICRON_MEDIATED_LIPID_TRANSPORT		16	0.230707	0.647186	0.916479	0.961665	1	2200	tags=19%, list=10%, signal=21%	NA
REACTOME_SIGNALLING_TO_P38_VIA_RIT_AND_RIN	REACTOME_SIGNALLING_TO_P38_VIA_RIT_AND_RIN		15	0.238096	0.642329	0.912281	0.961552	1	4270	tags=33%, list=20%, signal=41%	NA
REACTOME_BILE_ACID_AND_BILE_SALT_METABOLISM	REACTOME_BILE_ACID_AND_BILE_SALT_METABOLISM		27	0.199439	0.632246	0.940898	0.964179	1	6504	tags=37%, list=30%, signal=53%	NA
REACTOME_LIGAND_GATED_ION_CHANNEL_TRANSPORT	REACTOME_LIGAND_GATED_ION_CHANNEL_TRANSPORT		21	0.205556	0.615157	0.961364	0.969293	1	17207	tags=100%, list=79%, signal=486%	NA
REACTOME_ENDOGENOUS_STEROLS	REACTOME_ENDOGENOUS_STEROLS		15	0.162027	0.439808	0.997826	0.998317	1	3495	tags=13%, list=16%, signal=16%	NA

## Sheet: Supp Table S6
Supplementary Table S6: GSEA of transcriptional response to SY-1425 in RARA-high cell lines in hallmark and pathways gene sets
NAME	GS.br..follow.link.to.MSigDB	GS.DETAILS	SIZE	ES	NES	NOM.p.val	FDR.q.val	FWER.p.val	RANK.AT.MAX	LEADING.EDGE	X
PARK_TRETINOIN_RESPONSE_AND_PML_RARA_FUSION	PARK_TRETINOIN_RESPONSE_AND_PML_RARA_FUSION	Details ...	30	-0.904935	-2.67208	0	0	0	1491	tags=70%, list=7%, signal=75%	NA
HAMAI_APOPTOSIS_VIA_TRAIL_UP	HAMAI_APOPTOSIS_VIA_TRAIL_UP	Details ...	568	-0.609477	-2.65077	0	0	0	3837	tags=54%, list=18%, signal=64%	NA
PARK_TRETINOIN_RESPONSE_AND_RARA_PLZF_FUSION	PARK_TRETINOIN_RESPONSE_AND_RARA_PLZF_FUSION	Details ...	22	-0.902579	-2.52348	0	0	0	938	tags=64%, list=4%, signal=66%	NA
SHEN_SMARCA2_TARGETS_UP	SHEN_SMARCA2_TARGETS_UP	Details ...	417	-0.582768	-2.47954	0	0	0	4235	tags=59%, list=20%, signal=71%	NA
GABRIELY_MIR21_TARGETS	GABRIELY_MIR21_TARGETS	Details ...	283	-0.585488	-2.38726	0	0	0	3572	tags=51%, list=16%, signal=60%	NA
SEIDEN_ONCOGENESIS_BY_MET	SEIDEN_ONCOGENESIS_BY_MET	Details ...	86	-0.669754	-2.3803	0	0	0	3954	tags=65%, list=18%, signal=79%	NA
DACOSTA_UV_RESPONSE_VIA_ERCC3_DN	DACOSTA_UV_RESPONSE_VIA_ERCC3_DN	Details ...	834	-0.531724	-2.34306	0	0	0	3464	tags=46%, list=16%, signal=53%	NA
STEARMAN_TUMOR_FIELD_EFFECT_UP	STEARMAN_TUMOR_FIELD_EFFECT_UP	Details ...	35	-0.772688	-2.34067	0	0	0	1128	tags=40%, list=5%, signal=42%	NA
BROWNE_INTERFERON_RESPONSIVE_GENES	BROWNE_INTERFERON_RESPONSIVE_GENES	Details ...	67	-0.675334	-2.32308	0	0	0	1967	tags=36%, list=9%, signal=39%	NA
OSMAN_BLADDER_CANCER_UP	OSMAN_BLADDER_CANCER_UP	Details ...	389	-0.540071	-2.29616	0	0	0	3412	tags=49%, list=16%, signal=57%	NA
PAPASPYRIDONOS_UNSTABLE_ATEROSCLEROTIC_PLAQUE_UP	PAPASPYRIDONOS_UNSTABLE_ATEROSCLEROTIC_PLAQUE_UP	Details ...	51	-0.704607	-2.29096	0	0	0	1255	tags=37%, list=6%, signal=39%	NA
DACOSTA_UV_RESPONSE_VIA_ERCC3_COMMON_DN	DACOSTA_UV_RESPONSE_VIA_ERCC3_COMMON_DN	Details ...	476	-0.529097	-2.2826	0	8.5499e-05	0.001	3254	tags=46%, list=15%, signal=53%	NA
ZHENG_FOXP3_TARGETS_IN_THYMUS_UP	ZHENG_FOXP3_TARGETS_IN_THYMUS_UP	Details ...	186	-0.571165	-2.27723	0	7.89222e-05	0.001	3858	tags=52%, list=18%, signal=63%	NA
RUIZ_TNC_TARGETS_UP	RUIZ_TNC_TARGETS_UP	Details ...	151	-0.593713	-2.27647	0	7.32849e-05	0.001	2893	tags=40%, list=13%, signal=46%	NA
DE_YY1_TARGETS_DN	DE_YY1_TARGETS_DN	Details ...	92	-0.638236	-2.26561	0	0.000137851	0.002	3701	tags=54%, list=17%, signal=65%	NA
TAKEDA_TARGETS_OF_NUP98_HOXA9_FUSION_10D_UP	TAKEDA_TARGETS_OF_NUP98_HOXA9_FUSION_10D_UP	Details ...	183	-0.575594	-2.26189	0	0.000129236	0.002	2155	tags=26%, list=10%, signal=28%	NA
MILI_PSEUDOPODIA_HAPTOTAXIS_UP	MILI_PSEUDOPODIA_HAPTOTAXIS_UP	Details ...	505	-0.524051	-2.25283	0	0.000121633	0.002	3997	tags=50%, list=18%, signal=60%	NA
BURTON_ADIPOGENESIS_11	BURTON_ADIPOGENESIS_11	Details ...	54	-0.69438	-2.2381	0	0.000172626	0.003	3609	tags=59%, list=17%, signal=71%	NA
BYSTROEM_CORRELATED_WITH_IL5_DN	BYSTROEM_CORRELATED_WITH_IL5_DN	Details ...	64	-0.657391	-2.23687	0	0.00016354	0.003	2864	tags=56%, list=13%, signal=65%	NA
FLECHNER_BIOPSY_KIDNEY_TRANSPLANT_OK_VS_DONOR_UP	FLECHNER_BIOPSY_KIDNEY_TRANSPLANT_OK_VS_DONOR_UP	Details ...	545	-0.517114	-2.23466	0	0.000155363	0.003	3701	tags=45%, list=17%, signal=52%	NA
ZIRN_TRETINOIN_RESPONSE_UP	ZIRN_TRETINOIN_RESPONSE_UP		20	-0.822138	-2.22262	0	0.000196143	0.004	764	tags=35%, list=4%, signal=36%	NA
DAZARD_RESPONSE_TO_UV_NHEK_DN	DAZARD_RESPONSE_TO_UV_NHEK_DN		309	-0.538652	-2.22204	0	0.000233167	0.005	3262	tags=46%, list=15%, signal=53%	NA
DER_IFN_BETA_RESPONSE_UP	DER_IFN_BETA_RESPONSE_UP		102	-0.606746	-2.21703	0	0.000223029	0.005	2460	tags=42%, list=11%, signal=47%	NA
BASAKI_YBX1_TARGETS_DN	BASAKI_YBX1_TARGETS_DN		364	-0.528578	-2.21443	0	0.000213737	0.005	2459	tags=35%, list=11%, signal=39%	NA
DER_IFN_ALPHA_RESPONSE_UP	DER_IFN_ALPHA_RESPONSE_UP		74	-0.637723	-2.20014	0	0.000205187	0.005	2314	tags=45%, list=11%, signal=50%	NA
FUJII_YBX1_TARGETS_UP	FUJII_YBX1_TARGETS_UP		40	-0.707348	-2.19756	0	0.000236229	0.006	2459	tags=43%, list=11%, signal=48%	NA
CHUNG_BLISTER_CYTOTOXICITY_DN	CHUNG_BLISTER_CYTOTOXICITY_DN		42	-0.689039	-2.18056	0	0.000340956	0.009	3400	tags=69%, list=16%, signal=82%	NA
SCHLOSSER_SERUM_RESPONSE_DN	SCHLOSSER_SERUM_RESPONSE_DN		691	-0.49541	-2.17337	0	0.000513135	0.014	3849	tags=44%, list=18%, signal=52%	NA
MORI_PRE_BI_LYMPHOCYTE_DN	MORI_PRE_BI_LYMPHOCYTE_DN		74	-0.630043	-2.16444	0	0.000601425	0.017	2159	tags=42%, list=10%, signal=46%	NA
BROCKE_APOPTOSIS_REVERSED_BY_IL6	BROCKE_APOPTOSIS_REVERSED_BY_IL6		144	-0.558283	-2.15662	0	0.00071973	0.021	2812	tags=44%, list=13%, signal=50%	NA
RIGGI_EWING_SARCOMA_PROGENITOR_DN	RIGGI_EWING_SARCOMA_PROGENITOR_DN		175	-0.548464	-2.15182	0	0.000762475	0.023	1312	tags=18%, list=6%, signal=19%	NA
SENESE_HDAC3_TARGETS_UP	SENESE_HDAC3_TARGETS_UP		479	-0.497465	-2.14998	0	0.000770417	0.024	2829	tags=36%, list=13%, signal=40%	NA
ZHENG_BOUND_BY_FOXP3	ZHENG_BOUND_BY_FOXP3		477	-0.498318	-2.1341	0	0.00112047	0.036	3324	tags=36%, list=15%, signal=42%	NA
BOWIE_RESPONSE_TO_EXTRACELLULAR_MATRIX	BOWIE_RESPONSE_TO_EXTRACELLULAR_MATRIX		17	-0.816221	-2.13345	0	0.00108751	0.036	1739	tags=53%, list=8%, signal=58%	NA
BRACHAT_RESPONSE_TO_CISPLATIN	BRACHAT_RESPONSE_TO_CISPLATIN		21	-0.779554	-2.13266	0	0.00108629	0.037	1880	tags=52%, list=9%, signal=57%	NA
SENGUPTA_NASOPHARYNGEAL_CARCINOMA_WITH_LMP1_UP	SENGUPTA_NASOPHARYNGEAL_CARCINOMA_WITH_LMP1_UP		389	-0.502716	-2.13083	0	0.00105611	0.037	3486	tags=39%, list=16%, signal=46%	NA
DAZARD_UV_RESPONSE_CLUSTER_G6	DAZARD_UV_RESPONSE_CLUSTER_G6		148	-0.55142	-2.1238	0	0.00116726	0.042	3262	tags=51%, list=15%, signal=59%	NA
SANA_RESPONSE_TO_IFNG_UP	SANA_RESPONSE_TO_IFNG_UP		74	-0.61076	-2.11752	0	0.00135417	0.05	2476	tags=38%, list=11%, signal=43%	NA
FULCHER_INFLAMMATORY_RESPONSE_LECTIN_VS_LPS_DN	FULCHER_INFLAMMATORY_RESPONSE_LECTIN_VS_LPS_DN		441	-0.49187	-2.11331	0	0.0014782	0.056	3073	tags=38%, list=14%, signal=43%	NA
WELCSH_BRCA1_TARGETS_UP	WELCSH_BRCA1_TARGETS_UP		193	-0.533945	-2.10486	0	0.00164825	0.064	3188	tags=45%, list=15%, signal=52%	NA
BURTON_ADIPOGENESIS_12	BURTON_ADIPOGENESIS_12		32	-0.714043	-2.10323	0	0.00163281	0.065	4082	tags=75%, list=19%, signal=92%	NA
RUTELLA_RESPONSE_TO_CSF2RB_AND_IL4_DN	RUTELLA_RESPONSE_TO_CSF2RB_AND_IL4_DN		303	-0.502036	-2.09744	0	0.00174233	0.07	3232	tags=41%, list=15%, signal=47%	NA
APPEL_IMATINIB_RESPONSE	APPEL_IMATINIB_RESPONSE		32	-0.712566	-2.09403	0	0.00177359	0.073	1612	tags=47%, list=7%, signal=51%	NA
NICK_RESPONSE_TO_PROC_TREATMENT_DN	NICK_RESPONSE_TO_PROC_TREATMENT_DN		25	-0.740363	-2.09292	0	0.00173328	0.073	2460	tags=60%, list=11%, signal=68%	NA
CHEN_HOXA5_TARGETS_9HR_UP	CHEN_HOXA5_TARGETS_9HR_UP		215	-0.517822	-2.08809	0	0.00185564	0.079	4281	tags=53%, list=20%, signal=66%	NA
DEBIASI_APOPTOSIS_BY_REOVIRUS_INFECTION_UP	DEBIASI_APOPTOSIS_BY_REOVIRUS_INFECTION_UP		308	-0.505563	-2.08528	0	0.00190509	0.083	3742	tags=46%, list=17%, signal=55%	NA
BOWIE_RESPONSE_TO_TAMOXIFEN	BOWIE_RESPONSE_TO_TAMOXIFEN		18	-0.79682	-2.08477	0	0.0018864	0.084	2314	tags=56%, list=11%, signal=62%	NA
INGA_TP53_TARGETS	INGA_TP53_TARGETS		17	-0.797767	-2.08178	0	0.00195523	0.088	1202	tags=47%, list=6%, signal=50%	NA
BOSCO_INTERFERON_INDUCED_ANTIVIRAL_MODULE	BOSCO_INTERFERON_INDUCED_ANTIVIRAL_MODULE		74	-0.601431	-2.08152	0	0.00191533	0.088	1996	tags=30%, list=9%, signal=33%	NA
CHIARADONNA_NEOPLASTIC_TRANSFORMATION_CDC25_UP	CHIARADONNA_NEOPLASTIC_TRANSFORMATION_CDC25_UP		119	-0.551246	-2.07993	0	0.00193905	0.091	1256	tags=19%, list=6%, signal=20%	NA
CUI_TCF21_TARGETS_2_DN	CUI_TCF21_TARGETS_2_DN		808	-0.467564	-2.07573	0	0.0019619	0.094	3299	tags=36%, list=15%, signal=41%	NA
MARTENS_TRETINOIN_RESPONSE_UP	MARTENS_TRETINOIN_RESPONSE_UP		803	-0.467631	-2.07542	0	0.00194374	0.095	886	tags=8%, list=4%, signal=8%	NA
IKEDA_MIR1_TARGETS_UP	IKEDA_MIR1_TARGETS_UP		53	-0.627364	-2.06531	0	0.00223699	0.111	2848	tags=57%, list=13%, signal=65%	NA
RODRIGUES_DCC_TARGETS_DN	RODRIGUES_DCC_TARGETS_DN		120	-0.559934	-2.05972	0	0.00244419	0.121	3188	tags=47%, list=15%, signal=54%	NA
TRAYNOR_RETT_SYNDROM_DN	TRAYNOR_RETT_SYNDROM_DN		16	-0.804128	-2.05941	0	0.00239975	0.121	362	tags=25%, list=2%, signal=25%	NA
RIGGINS_TAMOXIFEN_RESISTANCE_DN	RIGGINS_TAMOXIFEN_RESISTANCE_DN		216	-0.509666	-2.05734	0	0.0024492	0.126	2751	tags=36%, list=13%, signal=41%	NA
LU_IL4_SIGNALING	LU_IL4_SIGNALING		90	-0.567981	-2.0541	0	0.00256939	0.134	1790	tags=32%, list=8%, signal=35%	NA
DER_IFN_GAMMA_RESPONSE_UP	DER_IFN_GAMMA_RESPONSE_UP		71	-0.599037	-2.05015	0	0.00273804	0.144	2390	tags=41%, list=11%, signal=46%	NA
FINETTI_BREAST_CANCERS_KINOME_GRAY	FINETTI_BREAST_CANCERS_KINOME_GRAY		15	-0.816507	-2.04297	0	0.00319843	0.168	3351	tags=87%, list=15%, signal=102%	NA
SENESE_HDAC1_TARGETS_UP	SENESE_HDAC1_TARGETS_UP		435	-0.478668	-2.04004	0	0.00333457	0.179	3193	tags=38%, list=15%, signal=44%	NA
KRIGE_RESPONSE_TO_TOSEDOSTAT_24HR_UP	KRIGE_RESPONSE_TO_TOSEDOSTAT_24HR_UP		717	-0.463568	-2.037	0	0.00344794	0.188	3353	tags=41%, list=15%, signal=47%	NA
PECE_MAMMARY_STEM_CELL_DN	PECE_MAMMARY_STEM_CELL_DN		134	-0.535689	-2.03334	0	0.00352553	0.195	3402	tags=44%, list=16%, signal=52%	NA
WANG_RESPONSE_TO_GSK3_INHIBITOR_SB216763_UP	WANG_RESPONSE_TO_GSK3_INHIBITOR_SB216763_UP		345	-0.485573	-2.02993	0	0.00364939	0.204	3323	tags=44%, list=15%, signal=51%	NA
FARMER_BREAST_CANCER_CLUSTER_1	FARMER_BREAST_CANCER_CLUSTER_1		43	-0.626913	-2.0276	0.00165563	0.00367372	0.209	1804	tags=21%, list=8%, signal=23%	NA
IVANOVA_HEMATOPOIESIS_MATURE_CELL	IVANOVA_HEMATOPOIESIS_MATURE_CELL		278	-0.494528	-2.02473	0	0.0037449	0.217	3400	tags=37%, list=16%, signal=43%	NA
BOYLAN_MULTIPLE_MYELOMA_C_CLUSTER_DN	BOYLAN_MULTIPLE_MYELOMA_C_CLUSTER_DN		31	-0.655452	-2.02138	0.0017094	0.00392371	0.228	2318	tags=42%, list=11%, signal=47%	NA
THUM_SYSTOLIC_HEART_FAILURE_UP	THUM_SYSTOLIC_HEART_FAILURE_UP		402	-0.473543	-2.01985	0	0.00395755	0.233	3211	tags=36%, list=15%, signal=42%	NA
WIELAND_UP_BY_HBV_INFECTION	WIELAND_UP_BY_HBV_INFECTION		97	-0.560818	-2.01807	0	0.00408121	0.244	2047	tags=37%, list=9%, signal=41%	NA
STEARMAN_LUNG_CANCER_EARLY_VS_LATE_UP	STEARMAN_LUNG_CANCER_EARLY_VS_LATE_UP		121	-0.534613	-2.014	0	0.00432188	0.256	2642	tags=35%, list=12%, signal=39%	NA
DOUGLAS_BMI1_TARGETS_DN	DOUGLAS_BMI1_TARGETS_DN		308	-0.488636	-2.0131	0	0.00430453	0.259	3857	tags=39%, list=18%, signal=47%	NA
AMUNDSON_DNA_DAMAGE_RESPONSE_TP53	AMUNDSON_DNA_DAMAGE_RESPONSE_TP53		16	-0.779107	-2.00918	0.00190476	0.00459372	0.275	1119	tags=50%, list=5%, signal=53%	NA
ABE_VEGFA_TARGETS	ABE_VEGFA_TARGETS		20	-0.738282	-2.00555	0	0.00473003	0.282	351	tags=25%, list=2%, signal=25%	NA
UROSEVIC_RESPONSE_TO_IMIQUIMOD	UROSEVIC_RESPONSE_TO_IMIQUIMOD		23	-0.72196	-2.00443	0.00351494	0.00477795	0.286	2636	tags=39%, list=12%, signal=45%	NA
RUTELLA_RESPONSE_TO_HGF_VS_CSF2RB_AND_IL4_UP	RUTELLA_RESPONSE_TO_HGF_VS_CSF2RB_AND_IL4_UP		393	-0.471012	-1.99682	0	0.0053544	0.319	2103	tags=27%, list=10%, signal=30%	NA
DAUER_STAT3_TARGETS_UP	DAUER_STAT3_TARGETS_UP		49	-0.620853	-1.99382	0	0.00549095	0.327	2368	tags=37%, list=11%, signal=41%	NA
RODRIGUES_THYROID_CARCINOMA_ANAPLASTIC_UP	RODRIGUES_THYROID_CARCINOMA_ANAPLASTIC_UP		691	-0.452314	-1.99244	0	0.00558159	0.337	3525	tags=41%, list=16%, signal=48%	NA
ENK_UV_RESPONSE_KERATINOCYTE_DN	ENK_UV_RESPONSE_KERATINOCYTE_DN		482	-0.462708	-1.99193	0	0.00558987	0.34	3280	tags=39%, list=15%, signal=45%	NA
BUYTAERT_PHOTODYNAMIC_THERAPY_STRESS_UP	BUYTAERT_PHOTODYNAMIC_THERAPY_STRESS_UP		793	-0.448528	-1.98358	0	0.00623366	0.367	3703	tags=38%, list=17%, signal=44%	NA
STAMBOLSKY_TARGETS_OF_MUTATED_TP53_UP	STAMBOLSKY_TARGETS_OF_MUTATED_TP53_UP		49	-0.614806	-1.97767	0	0.00676717	0.397	3283	tags=43%, list=15%, signal=50%	NA
DING_LUNG_CANCER_EXPRESSION_BY_COPY_NUMBER	DING_LUNG_CANCER_EXPRESSION_BY_COPY_NUMBER		99	-0.549539	-1.97466	0	0.00693944	0.407	3957	tags=52%, list=18%, signal=63%	NA
TONKS_TARGETS_OF_RUNX1_RUNX1T1_FUSION_ERYTHROCYTE_UP	TONKS_TARGETS_OF_RUNX1_RUNX1T1_FUSION_ERYTHROCYTE_UP		154	-0.509054	-1.97458	0	0.00686679	0.407	1319	tags=25%, list=6%, signal=26%	NA
BOSCO_ALLERGEN_INDUCED_TH2_ASSOCIATED_MODULE	BOSCO_ALLERGEN_INDUCED_TH2_ASSOCIATED_MODULE		144	-0.518087	-1.97315	0	0.00694565	0.414	2762	tags=32%, list=13%, signal=36%	NA
ONKEN_UVEAL_MELANOMA_UP	ONKEN_UVEAL_MELANOMA_UP		753	-0.444623	-1.97079	0	0.00712275	0.423	3294	tags=37%, list=15%, signal=42%	NA
WILENSKY_RESPONSE_TO_DARAPLADIB	WILENSKY_RESPONSE_TO_DARAPLADIB		29	-0.672698	-1.96364	0	0.00798126	0.467	988	tags=38%, list=5%, signal=40%	NA
ZHANG_INTERFERON_RESPONSE	ZHANG_INTERFERON_RESPONSE		23	-0.714082	-1.96219	0	0.00805679	0.478	2630	tags=48%, list=12%, signal=54%	NA
BOQUEST_STEM_CELL_CULTURED_VS_FRESH_UP	BOQUEST_STEM_CELL_CULTURED_VS_FRESH_UP		414	-0.458212	-1.95968	0	0.00817875	0.49	2162	tags=21%, list=10%, signal=23%	NA
MCLACHLAN_DENTAL_CARIES_UP	MCLACHLAN_DENTAL_CARIES_UP		241	-0.484538	-1.95617	0	0.0084404	0.507	1185	tags=22%, list=5%, signal=23%	NA
BILD_CTNNB1_ONCOGENIC_SIGNATURE	BILD_CTNNB1_ONCOGENIC_SIGNATURE		77	-0.55744	-1.95505	0.00154799	0.00840346	0.508	1872	tags=36%, list=9%, signal=40%	NA
SENESE_HDAC2_TARGETS_UP	SENESE_HDAC2_TARGETS_UP		110	-0.523747	-1.95468	0	0.00834382	0.51	2261	tags=34%, list=10%, signal=37%	NA
VERHAAK_AML_WITH_NPM1_MUTATED_UP	VERHAAK_AML_WITH_NPM1_MUTATED_UP		180	-0.495723	-1.95196	0	0.0085032	0.516	2155	tags=31%, list=10%, signal=34%	NA
NAKAYAMA_SOFT_TISSUE_TUMORS_PCA1_UP	NAKAYAMA_SOFT_TISSUE_TUMORS_PCA1_UP		71	-0.565741	-1.95046	0	0.00861459	0.522	1601	tags=25%, list=7%, signal=27%	NA
MARTENS_BOUND_BY_PML_RARA_FUSION	MARTENS_BOUND_BY_PML_RARA_FUSION		435	-0.454654	-1.94528	0	0.00905858	0.538	2813	tags=31%, list=13%, signal=35%	NA
SMIRNOV_CIRCULATING_ENDOTHELIOCYTES_IN_CANCER_UP	SMIRNOV_CIRCULATING_ENDOTHELIOCYTES_IN_CANCER_UP		156	-0.500015	-1.94292	0	0.00922768	0.545	2700	tags=33%, list=12%, signal=37%	NA
LUI_THYROID_CANCER_CLUSTER_1	LUI_THYROID_CANCER_CLUSTER_1		51	-0.58727	-1.94235	0	0.00920633	0.548	1909	tags=29%, list=9%, signal=32%	NA
KUROZUMI_RESPONSE_TO_ONCOCYTIC_VIRUS_AND_CYCLIC_RGD	KUROZUMI_RESPONSE_TO_ONCOCYTIC_VIRUS_AND_CYCLIC_RGD		21	-0.716677	-1.93918	0.00350877	0.00964165	0.575	1747	tags=24%, list=8%, signal=26%	NA
YANG_BREAST_CANCER_ESR1_LASER_DN	YANG_BREAST_CANCER_ESR1_LASER_DN		49	-0.592956	-1.93904	0	0.00956253	0.577	2959	tags=45%, list=14%, signal=52%	NA
KRASNOSELSKAYA_ILF3_TARGETS_UP	KRASNOSELSKAYA_ILF3_TARGETS_UP		38	-0.629766	-1.93902	0.00167785	0.00946395	0.577	2652	tags=37%, list=12%, signal=42%	NA
SIMBULAN_UV_RESPONSE_IMMORTALIZED_DN	SIMBULAN_UV_RESPONSE_IMMORTALIZED_DN		31	-0.646053	-1.93809	0.00162866	0.00949338	0.581	402	tags=26%, list=2%, signal=26%	NA
VERHAAK_GLIOBLASTOMA_MESENCHYMAL	VERHAAK_GLIOBLASTOMA_MESENCHYMAL		212	-0.482359	-1.93727	0	0.0095121	0.583	1680	tags=27%, list=8%, signal=29%	NA
DURCHDEWALD_SKIN_CARCINOGENESIS_DN	DURCHDEWALD_SKIN_CARCINOGENESIS_DN		261	-0.474622	-1.93653	0	0.00945866	0.585	2876	tags=32%, list=13%, signal=36%	NA
YIH_RESPONSE_TO_ARSENITE_C2	YIH_RESPONSE_TO_ARSENITE_C2		18	-0.735094	-1.93556	0	0.0094569	0.592	1901	tags=56%, list=9%, signal=61%	NA
LIU_SMARCA4_TARGETS	LIU_SMARCA4_TARGETS		60	-0.577465	-1.9339	0	0.0096378	0.604	1440	tags=22%, list=7%, signal=23%	NA
RUAN_RESPONSE_TO_TNF_DN	RUAN_RESPONSE_TO_TNF_DN		84	-0.541582	-1.93301	0	0.00964538	0.606	1612	tags=23%, list=7%, signal=24%	NA
GINESTIER_BREAST_CANCER_ZNF217_AMPLIFIED_UP	GINESTIER_BREAST_CANCER_ZNF217_AMPLIFIED_UP		72	-0.560513	-1.93293	0	0.00955263	0.606	3525	tags=54%, list=16%, signal=64%	NA
SMIRNOV_RESPONSE_TO_IR_2HR_UP	SMIRNOV_RESPONSE_TO_IR_2HR_UP		50	-0.596641	-1.92838	0.00162602	0.00999147	0.634	1202	tags=36%, list=6%, signal=38%	NA
GYORFFY_MITOXANTRONE_RESISTANCE	GYORFFY_MITOXANTRONE_RESISTANCE		51	-0.598802	-1.9252	0	0.0104238	0.657	2292	tags=31%, list=11%, signal=35%	NA
FOSTER_TOLERANT_MACROPHAGE_DN	FOSTER_TOLERANT_MACROPHAGE_DN		402	-0.45174	-1.92465	0	0.0104131	0.659	2390	tags=28%, list=11%, signal=31%	NA
CREIGHTON_ENDOCRINE_THERAPY_RESISTANCE_3	CREIGHTON_ENDOCRINE_THERAPY_RESISTANCE_3		676	-0.437812	-1.92417	0	0.0103545	0.661	2849	tags=28%, list=13%, signal=32%	NA
SHAFFER_IRF4_TARGETS_IN_ACTIVATED_DENDRITIC_CELL	SHAFFER_IRF4_TARGETS_IN_ACTIVATED_DENDRITIC_CELL		64	-0.559468	-1.91308	0	0.011719	0.709	2454	tags=42%, list=11%, signal=47%	NA
SPIELMAN_LYMPHOBLAST_EUROPEAN_VS_ASIAN_DN	SPIELMAN_LYMPHOBLAST_EUROPEAN_VS_ASIAN_DN		578	-0.442276	-1.91201	0	0.0118184	0.713	4275	tags=45%, list=20%, signal=54%	NA
CHIANG_LIVER_CANCER_SUBCLASS_INTERFERON_UP	CHIANG_LIVER_CANCER_SUBCLASS_INTERFERON_UP		26	-0.682428	-1.90967	0.00180832	0.0120194	0.719	1632	tags=23%, list=8%, signal=25%	NA
HORIUCHI_WTAP_TARGETS_UP	HORIUCHI_WTAP_TARGETS_UP		291	-0.459571	-1.90937	0	0.0119768	0.719	3136	tags=31%, list=14%, signal=36%	NA
HESS_TARGETS_OF_HOXA9_AND_MEIS1_DN	HESS_TARGETS_OF_HOXA9_AND_MEIS1_DN		76	-0.549659	-1.90861	0	0.0119985	0.722	1120	tags=29%, list=5%, signal=30%	NA
YAN_ESCAPE_FROM_ANOIKIS	YAN_ESCAPE_FROM_ANOIKIS		24	-0.683626	-1.90721	0	0.0120843	0.729	1996	tags=42%, list=9%, signal=46%	NA
PARK_APL_PATHOGENESIS_DN	PARK_APL_PATHOGENESIS_DN		48	-0.584999	-1.90633	0.00170068	0.0121408	0.734	1185	tags=33%, list=5%, signal=35%	NA
FERRARI_RESPONSE_TO_FENRETINIDE_UP	FERRARI_RESPONSE_TO_FENRETINIDE_UP		22	-0.698156	-1.90346	0.00352734	0.0124	0.744	1919	tags=36%, list=9%, signal=40%	NA
BURTON_ADIPOGENESIS_10	BURTON_ADIPOGENESIS_10		29	-0.645613	-1.9033	0	0.0123207	0.744	1433	tags=38%, list=7%, signal=41%	NA
ICHIBA_GRAFT_VERSUS_HOST_DISEASE_35D_UP	ICHIBA_GRAFT_VERSUS_HOST_DISEASE_35D_UP		124	-0.505544	-1.90327	0.00147275	0.0122163	0.744	1601	tags=27%, list=7%, signal=29%	NA
BECKER_TAMOXIFEN_RESISTANCE_UP	BECKER_TAMOXIFEN_RESISTANCE_UP		50	-0.581426	-1.90313	0	0.0121394	0.745	2512	tags=30%, list=12%, signal=34%	NA
XU_RESPONSE_TO_TRETINOIN_AND_NSC682994_UP	XU_RESPONSE_TO_TRETINOIN_AND_NSC682994_UP		17	-0.73174	-1.9024	0.00184502	0.0121325	0.749	1584	tags=53%, list=7%, signal=57%	NA
SAKAI_CHRONIC_HEPATITIS_VS_LIVER_CANCER_UP	SAKAI_CHRONIC_HEPATITIS_VS_LIVER_CANCER_UP		80	-0.539551	-1.90195	0	0.0121002	0.751	3887	tags=49%, list=18%, signal=59%	NA
ZHANG_TLX_TARGETS_36HR_DN	ZHANG_TLX_TARGETS_36HR_DN		184	-0.494214	-1.90043	0	0.012246	0.756	3758	tags=48%, list=17%, signal=58%	NA
PICCALUGA_ANGIOIMMUNOBLASTIC_LYMPHOMA_UP	PICCALUGA_ANGIOIMMUNOBLASTIC_LYMPHOMA_UP		203	-0.475542	-1.89604	0	0.0127922	0.774	2221	tags=18%, list=10%, signal=20%	NA
ODONNELL_TARGETS_OF_MYC_AND_TFRC_UP	ODONNELL_TARGETS_OF_MYC_AND_TFRC_UP		81	-0.538764	-1.89603	0	0.012689	0.774	2112	tags=32%, list=10%, signal=35%	NA
LEE_DOUBLE_POLAR_THYMOCYTE	LEE_DOUBLE_POLAR_THYMOCYTE		25	-0.664863	-1.89553	0.00350877	0.0126368	0.776	2725	tags=28%, list=13%, signal=32%	NA
GROSS_HYPOXIA_VIA_ELK3_DN	GROSS_HYPOXIA_VIA_ELK3_DN		153	-0.487058	-1.89198	0	0.0130929	0.796	3733	tags=41%, list=17%, signal=49%	NA
GAVIN_FOXP3_TARGETS_CLUSTER_T4	GAVIN_FOXP3_TARGETS_CLUSTER_T4		90	-0.525292	-1.88902	0.0015083	0.013542	0.807	2360	tags=33%, list=11%, signal=37%	NA
WUNDER_INFLAMMATORY_RESPONSE_AND_CHOLESTEROL_UP	WUNDER_INFLAMMATORY_RESPONSE_AND_CHOLESTEROL_UP		56	-0.562929	-1.88729	0	0.0137744	0.813	1729	tags=38%, list=8%, signal=41%	NA
ZHANG_RESPONSE_TO_IKK_INHIBITOR_AND_TNF_UP	ZHANG_RESPONSE_TO_IKK_INHIBITOR_AND_TNF_UP		217	-0.470397	-1.88649	0	0.0138026	0.816	1485	tags=22%, list=7%, signal=23%	NA
GEISS_RESPONSE_TO_DSRNA_UP	GEISS_RESPONSE_TO_DSRNA_UP		37	-0.622293	-1.88585	0.0016835	0.0137756	0.82	1764	tags=43%, list=8%, signal=47%	NA
SANA_TNF_SIGNALING_UP	SANA_TNF_SIGNALING_UP		82	-0.529681	-1.88426	0	0.0139462	0.825	1940	tags=30%, list=9%, signal=33%	NA
CROMER_METASTASIS_UP	CROMER_METASTASIS_UP		77	-0.538048	-1.88263	0	0.014107	0.829	3163	tags=45%, list=15%, signal=53%	NA
MARKEY_RB1_ACUTE_LOF_UP	MARKEY_RB1_ACUTE_LOF_UP		209	-0.466996	-1.88103	0	0.0142962	0.83	3365	tags=37%, list=16%, signal=43%	NA
CHANG_CORE_SERUM_RESPONSE_DN	CHANG_CORE_SERUM_RESPONSE_DN		198	-0.474139	-1.88026	0	0.0143123	0.832	2045	tags=27%, list=9%, signal=30%	NA
MORI_IMMATURE_B_LYMPHOCYTE_UP	MORI_IMMATURE_B_LYMPHOCYTE_UP		51	-0.565398	-1.87848	0	0.0144967	0.842	2425	tags=37%, list=11%, signal=42%	NA
KATSANOU_ELAVL1_TARGETS_UP	KATSANOU_ELAVL1_TARGETS_UP		166	-0.484021	-1.87735	0	0.0145194	0.845	1712	tags=17%, list=8%, signal=19%	NA
KOBAYASHI_RESPONSE_TO_ROMIDEPSIN	KOBAYASHI_RESPONSE_TO_ROMIDEPSIN		19	-0.708638	-1.87591	0.00345423	0.0146847	0.849	1932	tags=47%, list=9%, signal=52%	NA
NAKAMURA_TUMOR_ZONE_PERIPHERAL_VS_CENTRAL_DN	NAKAMURA_TUMOR_ZONE_PERIPHERAL_VS_CENTRAL_DN		589	-0.430521	-1.87574	0	0.0146303	0.849	3353	tags=35%, list=15%, signal=40%	NA
AMIT_EGF_RESPONSE_240_HELA	AMIT_EGF_RESPONSE_240_HELA		60	-0.556695	-1.8752	0	0.0145987	0.849	1615	tags=32%, list=7%, signal=34%	NA
ZHENG_IL22_SIGNALING_UP	ZHENG_IL22_SIGNALING_UP		53	-0.572577	-1.87408	0	0.0147596	0.855	786	tags=17%, list=4%, signal=18%	NA
HECKER_IFNB1_TARGETS	HECKER_IFNB1_TARGETS		93	-0.516557	-1.87083	0	0.0154005	0.869	1967	tags=24%, list=9%, signal=26%	NA
DELACROIX_RAR_TARGETS_UP	DELACROIX_RAR_TARGETS_UP		47	-0.584593	-1.87068	0.00159744	0.0153066	0.869	1128	tags=17%, list=5%, signal=18%	NA
SCHAEFFER_PROSTATE_DEVELOPMENT_AND_CANCER_BOX4_DN	SCHAEFFER_PROSTATE_DEVELOPMENT_AND_CANCER_BOX4_DN		32	-0.630482	-1.86794	0.00170068	0.0156687	0.873	3351	tags=50%, list=15%, signal=59%	NA
SPIELMAN_LYMPHOBLAST_EUROPEAN_VS_ASIAN_2FC_DN	SPIELMAN_LYMPHOBLAST_EUROPEAN_VS_ASIAN_2FC_DN		21	-0.691308	-1.86788	0.00554529	0.0155743	0.873	902	tags=24%, list=4%, signal=25%	NA
HAHTOLA_MYCOSIS_FUNGOIDES_CD4_UP	HAHTOLA_MYCOSIS_FUNGOIDES_CD4_UP		61	-0.556664	-1.86642	0	0.0157165	0.877	1756	tags=31%, list=8%, signal=34%	NA
ZIRN_TRETINOIN_RESPONSE_WT1_UP	ZIRN_TRETINOIN_RESPONSE_WT1_UP		22	-0.68391	-1.86637	0.003663	0.0156089	0.877	1735	tags=27%, list=8%, signal=30%	NA
NIELSEN_SYNOVIAL_SARCOMA_DN	NIELSEN_SYNOVIAL_SARCOMA_DN		20	-0.702894	-1.86597	0.00528169	0.0155519	0.878	1459	tags=45%, list=7%, signal=48%	NA
LIU_VAV3_PROSTATE_CARCINOGENESIS_UP	LIU_VAV3_PROSTATE_CARCINOGENESIS_UP		88	-0.525471	-1.86407	0.00152207	0.0158156	0.886	1717	tags=22%, list=8%, signal=23%	NA
MARTINEZ_RESPONSE_TO_TRABECTEDIN_DN	MARTINEZ_RESPONSE_TO_TRABECTEDIN_DN		268	-0.455093	-1.86346	0	0.0158261	0.887	3968	tags=47%, list=18%, signal=56%	NA
SEIDEN_MET_SIGNALING	SEIDEN_MET_SIGNALING		19	-0.695947	-1.85998	0.00562852	0.0163324	0.897	3758	tags=68%, list=17%, signal=83%	NA
GROSS_HYPOXIA_VIA_ELK3_ONLY_UP	GROSS_HYPOXIA_VIA_ELK3_ONLY_UP		33	-0.610826	-1.85907	0.00158228	0.0164087	0.899	1815	tags=30%, list=8%, signal=33%	NA
JOHNSTONE_PARVB_TARGETS_3_UP	JOHNSTONE_PARVB_TARGETS_3_UP		416	-0.434426	-1.85842	0	0.0164569	0.9	2844	tags=28%, list=13%, signal=32%	NA
IKEDA_MIR30_TARGETS_UP	IKEDA_MIR30_TARGETS_UP		115	-0.502418	-1.85661	0	0.0166469	0.909	3434	tags=45%, list=16%, signal=53%	NA
LIANG_SILENCED_BY_METHYLATION_2	LIANG_SILENCED_BY_METHYLATION_2		52	-0.560169	-1.8555	0	0.0167263	0.911	1739	tags=23%, list=8%, signal=25%	NA
SEKI_INFLAMMATORY_RESPONSE_LPS_UP	SEKI_INFLAMMATORY_RESPONSE_LPS_UP		75	-0.527946	-1.85514	0	0.0166918	0.912	1478	tags=24%, list=7%, signal=26%	NA
RUAN_RESPONSE_TO_TNF_TROGLITAZONE_DN	RUAN_RESPONSE_TO_TNF_TROGLITAZONE_DN		42	-0.595365	-1.85484	0.00162338	0.0166243	0.913	1612	tags=26%, list=7%, signal=28%	NA
RUAN_RESPONSE_TO_TROGLITAZONE_UP	RUAN_RESPONSE_TO_TROGLITAZONE_UP		25	-0.66134	-1.85316	0.00496689	0.0168792	0.918	2952	tags=36%, list=14%, signal=42%	NA
HOWLIN_CITED1_TARGETS_1_DN	HOWLIN_CITED1_TARGETS_1_DN		35	-0.611418	-1.85282	0	0.0168178	0.918	3300	tags=46%, list=15%, signal=54%	NA
GENTILE_UV_RESPONSE_CLUSTER_D2	GENTILE_UV_RESPONSE_CLUSTER_D2		41	-0.586185	-1.85236	0.00827815	0.0168024	0.918	3026	tags=44%, list=14%, signal=51%	NA
ABBUD_LIF_SIGNALING_1_UP	ABBUD_LIF_SIGNALING_1_UP		46	-0.576587	-1.85128	0	0.016942	0.926	2844	tags=30%, list=13%, signal=35%	NA
PARK_HSC_VS_MULTIPOTENT_PROGENITORS_UP	PARK_HSC_VS_MULTIPOTENT_PROGENITORS_UP		19	-0.688252	-1.85122	0.00728597	0.0168368	0.926	4407	tags=63%, list=20%, signal=79%	NA
KIM_MYCN_AMPLIFICATION_TARGETS_DN	KIM_MYCN_AMPLIFICATION_TARGETS_DN		99	-0.507255	-1.84908	0	0.0171219	0.929	2265	tags=28%, list=10%, signal=31%	NA
RODRIGUES_THYROID_CARCINOMA_DN	RODRIGUES_THYROID_CARCINOMA_DN		74	-0.5325	-1.84224	0.00148588	0.0183163	0.945	3361	tags=39%, list=16%, signal=46%	NA
MARTORIATI_MDM4_TARGETS_FETAL_LIVER_DN	MARTORIATI_MDM4_TARGETS_FETAL_LIVER_DN		504	-0.421903	-1.83837	0	0.0190607	0.951	3796	tags=38%, list=18%, signal=45%	NA
MCLACHLAN_DENTAL_CARIES_DN	MCLACHLAN_DENTAL_CARIES_DN		231	-0.452993	-1.83596	0	0.0194518	0.954	1128	tags=19%, list=5%, signal=19%	NA
DUTERTRE_ESTRADIOL_RESPONSE_24HR_DN	DUTERTRE_ESTRADIOL_RESPONSE_24HR_DN		496	-0.428446	-1.83582	0	0.019378	0.954	3674	tags=36%, list=17%, signal=42%	NA
LEE_DIFFERENTIATING_T_LYMPHOCYTE	LEE_DIFFERENTIATING_T_LYMPHOCYTE		184	-0.468031	-1.83552	0	0.0193301	0.957	2663	tags=33%, list=12%, signal=37%	NA
QI_PLASMACYTOMA_UP	QI_PLASMACYTOMA_UP		256	-0.449888	-1.83343	0	0.0195955	0.959	2478	tags=28%, list=11%, signal=31%	NA
MARSON_BOUND_BY_FOXP3_STIMULATED	MARSON_BOUND_BY_FOXP3_STIMULATED		981	-0.410669	-1.83077	0	0.0201446	0.967	3960	tags=35%, list=18%, signal=41%	NA
WAMUNYOKOLI_OVARIAN_CANCER_GRADES_1_2_DN	WAMUNYOKOLI_OVARIAN_CANCER_GRADES_1_2_DN		62	-0.53686	-1.82835	0.00309598	0.0206079	0.969	1541	tags=27%, list=7%, signal=29%	NA
FALVELLA_SMOKERS_WITH_LUNG_CANCER	FALVELLA_SMOKERS_WITH_LUNG_CANCER		79	-0.525421	-1.82761	0	0.0206384	0.97	1953	tags=32%, list=9%, signal=35%	NA
CHEMELLO_SOLEUS_VS_EDL_MYOFIBERS_DN	CHEMELLO_SOLEUS_VS_EDL_MYOFIBERS_DN		19	-0.682692	-1.82742	0.00336134	0.0205604	0.971	430	tags=16%, list=2%, signal=16%	NA
ENGELMANN_CANCER_PROGENITORS_DN	ENGELMANN_CANCER_PROGENITORS_DN		69	-0.536655	-1.8267	0.00453858	0.0206387	0.971	777	tags=17%, list=4%, signal=18%	NA
TIEN_INTESTINE_PROBIOTICS_24HR_DN	TIEN_INTESTINE_PROBIOTICS_24HR_DN		214	-0.456392	-1.82257	0	0.0214792	0.975	3774	tags=41%, list=17%, signal=49%	NA
MARTINEZ_RB1_AND_TP53_TARGETS_UP	MARTINEZ_RB1_AND_TP53_TARGETS_UP		584	-0.416607	-1.82174	0	0.0215574	0.975	3241	tags=30%, list=15%, signal=34%	NA
BROWNE_HCMV_INFECTION_4HR_UP	BROWNE_HCMV_INFECTION_4HR_UP		54	-0.556933	-1.82073	0.0015625	0.0216989	0.976	2718	tags=26%, list=13%, signal=30%	NA
CHIANG_LIVER_CANCER_SUBCLASS_POLYSOMY7_DN	CHIANG_LIVER_CANCER_SUBCLASS_POLYSOMY7_DN		24	-0.649333	-1.81756	0.005386	0.0223227	0.977	1382	tags=38%, list=6%, signal=40%	NA
BROWNE_HCMV_INFECTION_6HR_DN	BROWNE_HCMV_INFECTION_6HR_DN		156	-0.467877	-1.8175	0	0.0222145	0.977	2275	tags=27%, list=11%, signal=30%	NA
ONKEN_UVEAL_MELANOMA_DN	ONKEN_UVEAL_MELANOMA_DN		514	-0.419709	-1.8148	0	0.0226724	0.979	3225	tags=31%, list=15%, signal=35%	NA
XU_AKT1_TARGETS_6HR	XU_AKT1_TARGETS_6HR		27	-0.617928	-1.81346	0.00509338	0.022856	0.98	2708	tags=37%, list=13%, signal=42%	NA
WALLACE_PROSTATE_CANCER_RACE_UP	WALLACE_PROSTATE_CANCER_RACE_UP		284	-0.436434	-1.81289	0	0.0228779	0.981	2132	tags=22%, list=10%, signal=24%	NA
TAKEDA_TARGETS_OF_NUP98_HOXA9_FUSION_16D_UP	TAKEDA_TARGETS_OF_NUP98_HOXA9_FUSION_16D_UP		167	-0.464019	-1.81263	0	0.02282	0.981	2598	tags=27%, list=12%, signal=30%	NA
VARELA_ZMPSTE24_TARGETS_UP	VARELA_ZMPSTE24_TARGETS_UP		38	-0.575629	-1.81201	0.00163399	0.0228868	0.983	1130	tags=29%, list=5%, signal=30%	NA
TSAI_RESPONSE_TO_RADIATION_THERAPY	TSAI_RESPONSE_TO_RADIATION_THERAPY		32	-0.613346	-1.8115	0.003367	0.0228908	0.983	866	tags=22%, list=4%, signal=23%	NA
BROWN_MYELOID_CELL_DEVELOPMENT_UP	BROWN_MYELOID_CELL_DEVELOPMENT_UP		161	-0.46527	-1.81101	0	0.0228565	0.983	1799	tags=26%, list=8%, signal=28%	NA
CHIBA_RESPONSE_TO_TSA_DN	CHIBA_RESPONSE_TO_TSA_DN		23	-0.64521	-1.81069	0.00516351	0.0227837	0.983	1773	tags=43%, list=8%, signal=47%	NA
KERLEY_RESPONSE_TO_CISPLATIN_UP	KERLEY_RESPONSE_TO_CISPLATIN_UP		44	-0.568512	-1.80895	0.00480769	0.0231138	0.984	1799	tags=39%, list=8%, signal=42%	NA
SPIRA_SMOKERS_LUNG_CANCER_UP	SPIRA_SMOKERS_LUNG_CANCER_UP		38	-0.584963	-1.80267	0.00331675	0.0245207	0.989	2776	tags=50%, list=13%, signal=57%	NA
EHLERS_ANEUPLOIDY_UP	EHLERS_ANEUPLOIDY_UP		41	-0.570537	-1.80233	0.00164204	0.0244886	0.989	2448	tags=39%, list=11%, signal=44%	NA
CLASPER_LYMPHATIC_VESSELS_DURING_METASTASIS_UP	CLASPER_LYMPHATIC_VESSELS_DURING_METASTASIS_UP		19	-0.670175	-1.80025	0.0104167	0.024913	0.989	867	tags=21%, list=4%, signal=22%	NA
YAO_TEMPORAL_RESPONSE_TO_PROGESTERONE_CLUSTER_8	YAO_TEMPORAL_RESPONSE_TO_PROGESTERONE_CLUSTER_8		48	-0.552189	-1.79971	0	0.0249127	0.99	1540	tags=31%, list=7%, signal=34%	NA
JOHNSTONE_PARVB_TARGETS_2_DN	JOHNSTONE_PARVB_TARGETS_2_DN		322	-0.433574	-1.79879	0	0.0250086	0.991	4020	tags=43%, list=19%, signal=52%	NA
EINAV_INTERFERON_SIGNATURE_IN_CANCER	EINAV_INTERFERON_SIGNATURE_IN_CANCER		26	-0.638164	-1.79837	0.0124334	0.0250182	0.991	3093	tags=58%, list=14%, signal=67%	NA
LU_AGING_BRAIN_UP	LU_AGING_BRAIN_UP		258	-0.439752	-1.79772	0	0.0250913	0.991	2876	tags=29%, list=13%, signal=33%	NA
PLASARI_TGFB1_SIGNALING_VIA_NFIC_10HR_UP	PLASARI_TGFB1_SIGNALING_VIA_NFIC_10HR_UP		52	-0.552763	-1.79658	0.00475436	0.0253162	0.991	2012	tags=17%, list=9%, signal=19%	NA
THEILGAARD_NEUTROPHIL_AT_SKIN_WOUND_DN	THEILGAARD_NEUTROPHIL_AT_SKIN_WOUND_DN		223	-0.45039	-1.7954	0	0.0255921	0.992	3216	tags=39%, list=15%, signal=46%	NA
ALTEMEIER_RESPONSE_TO_LPS_WITH_MECHANICAL_VENTILATION	ALTEMEIER_RESPONSE_TO_LPS_WITH_MECHANICAL_VENTILATION		127	-0.471775	-1.79503	0	0.0255455	0.992	2478	tags=27%, list=11%, signal=30%	NA
ZHAN_MULTIPLE_MYELOMA_LB_DN	ZHAN_MULTIPLE_MYELOMA_LB_DN		37	-0.582139	-1.79329	0.00503356	0.0258953	0.992	1996	tags=35%, list=9%, signal=39%	NA
GARGALOVIC_RESPONSE_TO_OXIDIZED_PHOSPHOLIPIDS_GREY_DN	GARGALOVIC_RESPONSE_TO_OXIDIZED_PHOSPHOLIPIDS_GREY_DN		66	-0.521222	-1.79306	0.00307692	0.0258425	0.992	2082	tags=24%, list=10%, signal=27%	NA
KIM_GERMINAL_CENTER_T_HELPER_UP	KIM_GERMINAL_CENTER_T_HELPER_UP		63	-0.524097	-1.79305	0.00154083	0.0257233	0.992	5395	tags=57%, list=25%, signal=76%	NA
CHEN_ETV5_TARGETS_SERTOLI	CHEN_ETV5_TARGETS_SERTOLI		20	-0.669882	-1.79302	0.003663	0.0256005	0.992	170	tags=20%, list=1%, signal=20%	NA
JI_RESPONSE_TO_FSH_DN	JI_RESPONSE_TO_FSH_DN		57	-0.53131	-1.79166	0.00321027	0.0258514	0.992	3214	tags=49%, list=15%, signal=58%	NA
BROWNE_HCMV_INFECTION_2HR_UP	BROWNE_HCMV_INFECTION_2HR_UP		39	-0.578494	-1.79132	0.00165563	0.0257902	0.992	966	tags=13%, list=4%, signal=13%	NA
RAGHAVACHARI_PLATELET_SPECIFIC_GENES	RAGHAVACHARI_PLATELET_SPECIFIC_GENES		69	-0.520508	-1.78971	0.00152439	0.0260267	0.992	3262	tags=39%, list=15%, signal=46%	NA
YU_MYC_TARGETS_DN	YU_MYC_TARGETS_DN		52	-0.552187	-1.7895	0	0.0259598	0.992	2128	tags=31%, list=10%, signal=34%	NA
BOSCO_TH1_CYTOTOXIC_MODULE	BOSCO_TH1_CYTOTOXIC_MODULE		111	-0.485896	-1.78456	0	0.0272754	0.994	2507	tags=17%, list=12%, signal=19%	NA
LAIHO_COLORECTAL_CANCER_SERRATED_UP	LAIHO_COLORECTAL_CANCER_SERRATED_UP		107	-0.485798	-1.7837	0	0.0273283	0.995	3623	tags=48%, list=17%, signal=57%	NA
HAHTOLA_MYCOSIS_FUNGOIDES_CD4_DN	HAHTOLA_MYCOSIS_FUNGOIDES_CD4_DN		113	-0.480198	-1.78146	0	0.0277318	0.995	3306	tags=45%, list=15%, signal=53%	NA
AZARE_STAT3_TARGETS	AZARE_STAT3_TARGETS		23	-0.642069	-1.78136	0.00899281	0.0276386	0.995	2547	tags=43%, list=12%, signal=49%	NA
BERENJENO_TRANSFORMED_BY_RHOA_FOREVER_DN	BERENJENO_TRANSFORMED_BY_RHOA_FOREVER_DN		31	-0.60598	-1.77988	0.00522648	0.0279088	0.995	1749	tags=32%, list=8%, signal=35%	NA
BOYAULT_LIVER_CANCER_SUBCLASS_G5_DN	BOYAULT_LIVER_CANCER_SUBCLASS_G5_DN		26	-0.629533	-1.77986	0.00713012	0.0277863	0.995	783	tags=31%, list=4%, signal=32%	NA
SMID_BREAST_CANCER_NORMAL_LIKE_UP	SMID_BREAST_CANCER_NORMAL_LIKE_UP		456	-0.411798	-1.77709	0	0.0284481	0.995	1733	tags=16%, list=8%, signal=17%	NA
WENDT_COHESIN_TARGETS_UP	WENDT_COHESIN_TARGETS_UP		33	-0.582445	-1.77562	0.00687285	0.0287111	0.996	3230	tags=58%, list=15%, signal=68%	NA
PARK_HSC_MARKERS	PARK_HSC_MARKERS		44	-0.55432	-1.77482	0.00169205	0.0288183	0.996	2478	tags=48%, list=11%, signal=54%	NA
SESTO_RESPONSE_TO_UV_C2	SESTO_RESPONSE_TO_UV_C2		53	-0.539351	-1.77351	0.00465839	0.0291786	0.997	3034	tags=36%, list=14%, signal=42%	NA
MARTINEZ_TP53_TARGETS_UP	MARTINEZ_TP53_TARGETS_UP		583	-0.407417	-1.77304	0	0.0292106	0.997	3241	tags=29%, list=15%, signal=33%	NA
GAZDA_DIAMOND_BLACKFAN_ANEMIA_MYELOID_UP	GAZDA_DIAMOND_BLACKFAN_ANEMIA_MYELOID_UP		29	-0.613363	-1.77166	0.00348432	0.0295172	0.997	2291	tags=52%, list=11%, signal=58%	NA
PASQUALUCCI_LYMPHOMA_BY_GC_STAGE_DN	PASQUALUCCI_LYMPHOMA_BY_GC_STAGE_DN		157	-0.453456	-1.7709	0	0.0296036	0.997	3132	tags=38%, list=14%, signal=44%	NA
SHAFFER_IRF4_TARGETS_IN_PLASMA_CELL_VS_MATURE_B_LYMPHOCYTE	SHAFFER_IRF4_TARGETS_IN_PLASMA_CELL_VS_MATURE_B_LYMPHOCYTE		67	-0.514385	-1.76791	0.00305344	0.0303718	0.997	3480	tags=43%, list=16%, signal=51%	NA
LIANG_SILENCED_BY_METHYLATION_UP	LIANG_SILENCED_BY_METHYLATION_UP		31	-0.60395	-1.7633	0.0171233	0.0318626	0.999	1723	tags=26%, list=8%, signal=28%	NA
GEORGES_TARGETS_OF_MIR192_AND_MIR215	GEORGES_TARGETS_OF_MIR192_AND_MIR215		848	-0.398666	-1.76306	0	0.0317555	0.999	3627	tags=35%, list=17%, signal=40%	NA
KIM_GERMINAL_CENTER_T_HELPER_DN	KIM_GERMINAL_CENTER_T_HELPER_DN		23	-0.646108	-1.7623	0.0104167	0.0318127	0.999	897	tags=13%, list=4%, signal=14%	NA
KHETCHOUMIAN_TRIM24_TARGETS_UP	KHETCHOUMIAN_TRIM24_TARGETS_UP		46	-0.557817	-1.76194	0.00322061	0.0317671	0.999	1319	tags=28%, list=6%, signal=30%	NA
GENTLES_LEUKEMIC_STEM_CELL_DN	GENTLES_LEUKEMIC_STEM_CELL_DN		19	-0.661088	-1.75886	0.00550459	0.0326246	0.999	1139	tags=21%, list=5%, signal=22%	NA
WANG_CLIM2_TARGETS_DN	WANG_CLIM2_TARGETS_DN		178	-0.446611	-1.75749	0	0.032924	0.999	3828	tags=44%, list=18%, signal=53%	NA
STREICHER_LSM1_TARGETS_DN	STREICHER_LSM1_TARGETS_DN		19	-0.677689	-1.75463	0.00575816	0.0336548	1	2390	tags=37%, list=11%, signal=41%	NA
IZADPANAH_STEM_CELL_ADIPOSE_VS_BONE_DN	IZADPANAH_STEM_CELL_ADIPOSE_VS_BONE_DN		105	-0.478338	-1.75338	0.00292398	0.0339472	1	2413	tags=19%, list=11%, signal=21%	NA
RUTELLA_RESPONSE_TO_HGF_DN	RUTELLA_RESPONSE_TO_HGF_DN		228	-0.429601	-1.75265	0	0.0340429	1	2922	tags=33%, list=13%, signal=38%	NA
MARTINEZ_RESPONSE_TO_TRABECTEDIN	MARTINEZ_RESPONSE_TO_TRABECTEDIN		49	-0.55247	-1.75221	0.00481541	0.0340028	1	4310	tags=51%, list=20%, signal=64%	NA
MAGRANGEAS_MULTIPLE_MYELOMA_IGLL_VS_IGLK_UP	MAGRANGEAS_MULTIPLE_MYELOMA_IGLL_VS_IGLK_UP		41	-0.564879	-1.74994	0.0066778	0.0346917	1	3041	tags=29%, list=14%, signal=34%	NA
ONDER_CDH1_TARGETS_1_UP	ONDER_CDH1_TARGETS_1_UP		136	-0.457723	-1.74761	0	0.0353036	1	2901	tags=30%, list=13%, signal=35%	NA
DEURIG_T_CELL_PROLYMPHOCYTIC_LEUKEMIA_DN	DEURIG_T_CELL_PROLYMPHOCYTIC_LEUKEMIA_DN		300	-0.423655	-1.74461	0	0.0361871	1	3112	tags=34%, list=14%, signal=39%	NA
BERTUCCI_MEDULLARY_VS_DUCTAL_BREAST_CANCER_UP	BERTUCCI_MEDULLARY_VS_DUCTAL_BREAST_CANCER_UP		196	-0.437451	-1.74406	0	0.0362268	1	3580	tags=33%, list=17%, signal=39%	NA
ZWANG_CLASS_3_TRANSIENTLY_INDUCED_BY_EGF	ZWANG_CLASS_3_TRANSIENTLY_INDUCED_BY_EGF		214	-0.439048	-1.74349	0	0.0362968	1	2574	tags=28%, list=12%, signal=32%	NA
YOSHIMURA_MAPK8_TARGETS_DN	YOSHIMURA_MAPK8_TARGETS_DN		357	-0.41536	-1.74308	0	0.0362566	1	3256	tags=32%, list=15%, signal=37%	NA
WAMUNYOKOLI_OVARIAN_CANCER_LMP_DN	WAMUNYOKOLI_OVARIAN_CANCER_LMP_DN		189	-0.436986	-1.74286	0	0.0361685	1	3242	tags=34%, list=15%, signal=39%	NA
OSWALD_HEMATOPOIETIC_STEM_CELL_IN_COLLAGEN_GEL_DN	OSWALD_HEMATOPOIETIC_STEM_CELL_IN_COLLAGEN_GEL_DN		262	-0.425397	-1.74273	0	0.0360378	1	2860	tags=32%, list=13%, signal=37%	NA
HOSHIDA_LIVER_CANCER_SUBCLASS_S2	HOSHIDA_LIVER_CANCER_SUBCLASS_S2		114	-0.461913	-1.74268	0.00146628	0.035908	1	1902	tags=25%, list=9%, signal=28%	NA
ODONNELL_TFRC_TARGETS_UP	ODONNELL_TFRC_TARGETS_UP		393	-0.413527	-1.74248	0	0.0358097	1	2451	tags=21%, list=11%, signal=24%	NA
SMIRNOV_RESPONSE_TO_IR_6HR_UP	SMIRNOV_RESPONSE_TO_IR_6HR_UP		159	-0.446475	-1.74235	0	0.0356991	1	3057	tags=36%, list=14%, signal=41%	NA
JUBAN_TARGETS_OF_SPI1_AND_FLI1_UP	JUBAN_TARGETS_OF_SPI1_AND_FLI1_UP		111	-0.477431	-1.74234	0	0.0355509	1	2801	tags=32%, list=13%, signal=36%	NA
AMIT_EGF_RESPONSE_60_MCF10A	AMIT_EGF_RESPONSE_60_MCF10A		38	-0.568567	-1.74114	0.0121107	0.0358134	1	2574	tags=37%, list=12%, signal=42%	NA
PUIFFE_INVASION_INHIBITED_BY_ASCITES_DN	PUIFFE_INVASION_INHIBITED_BY_ASCITES_DN		143	-0.45419	-1.73981	0	0.0361039	1	4128	tags=48%, list=19%, signal=58%	NA
KARLSSON_TGFB1_TARGETS_DN	KARLSSON_TGFB1_TARGETS_DN		201	-0.432346	-1.73764	0	0.0366148	1	2834	tags=27%, list=13%, signal=31%	NA
TURASHVILI_BREAST_NORMAL_DUCTAL_VS_LOBULAR_UP	TURASHVILI_BREAST_NORMAL_DUCTAL_VS_LOBULAR_UP		62	-0.515271	-1.73688	0.0015361	0.0367224	1	4688	tags=53%, list=22%, signal=68%	NA
KIM_WT1_TARGETS_DN	KIM_WT1_TARGETS_DN		439	-0.408239	-1.73639	0	0.0367162	1	3229	tags=36%, list=15%, signal=41%	NA
BASSO_HAIRY_CELL_LEUKEMIA_DN	BASSO_HAIRY_CELL_LEUKEMIA_DN		80	-0.493253	-1.73584	0.003003	0.0367511	1	1733	tags=23%, list=8%, signal=24%	NA
SCHMIDT_POR_TARGETS_IN_LIMB_BUD_UP	SCHMIDT_POR_TARGETS_IN_LIMB_BUD_UP		25	-0.626072	-1.73417	0.0117647	0.0371519	1	1828	tags=32%, list=8%, signal=35%	NA
STEARMAN_LUNG_CANCER_EARLY_VS_LATE_DN	STEARMAN_LUNG_CANCER_EARLY_VS_LATE_DN		58	-0.522838	-1.73405	0.00654665	0.0370401	1	1660	tags=22%, list=8%, signal=24%	NA
SHIN_B_CELL_LYMPHOMA_CLUSTER_8	SHIN_B_CELL_LYMPHOMA_CLUSTER_8		36	-0.569329	-1.7337	0.0102916	0.0369949	1	2419	tags=33%, list=11%, signal=37%	NA
STARK_PREFRONTAL_CORTEX_22Q11_DELETION_UP	STARK_PREFRONTAL_CORTEX_22Q11_DELETION_UP		191	-0.434019	-1.73345	0	0.0369051	1	3448	tags=37%, list=16%, signal=43%	NA
LANDIS_ERBB2_BREAST_PRENEOPLASTIC_DN	LANDIS_ERBB2_BREAST_PRENEOPLASTIC_DN		54	-0.52329	-1.73142	0.00466563	0.0375282	1	1724	tags=24%, list=8%, signal=26%	NA
ICHIBA_GRAFT_VERSUS_HOST_DISEASE_D7_UP	ICHIBA_GRAFT_VERSUS_HOST_DISEASE_D7_UP		103	-0.473068	-1.73042	0	0.0377744	1	2047	tags=28%, list=9%, signal=31%	NA
BURTON_ADIPOGENESIS_8	BURTON_ADIPOGENESIS_8		84	-0.486402	-1.72985	0.0015083	0.0378202	1	3234	tags=38%, list=15%, signal=45%	NA
MITSIADES_RESPONSE_TO_APLIDIN_UP	MITSIADES_RESPONSE_TO_APLIDIN_UP		422	-0.409505	-1.7292	0	0.0379067	1	3402	tags=32%, list=16%, signal=37%	NA
TAKEDA_TARGETS_OF_NUP98_HOXA9_FUSION_8D_UP	TAKEDA_TARGETS_OF_NUP98_HOXA9_FUSION_8D_UP		148	-0.44931	-1.72773	0	0.0381854	1	2155	tags=24%, list=10%, signal=26%	NA
WANG_IMMORTALIZED_BY_HOXA9_AND_MEIS1_UP	WANG_IMMORTALIZED_BY_HOXA9_AND_MEIS1_UP		30	-0.585361	-1.72613	0.00841751	0.0386671	1	2341	tags=37%, list=11%, signal=41%	NA
WHITFIELD_CELL_CYCLE_S	WHITFIELD_CELL_CYCLE_S		156	-0.446912	-1.72558	0	0.0387214	1	3327	tags=36%, list=15%, signal=42%	NA
PASQUALUCCI_LYMPHOMA_BY_GC_STAGE_UP	PASQUALUCCI_LYMPHOMA_BY_GC_STAGE_UP		271	-0.421985	-1.72536	0	0.0386437	1	2891	tags=28%, list=13%, signal=32%	NA
HOFMANN_MYELODYSPLASTIC_SYNDROM_RISK_DN	HOFMANN_MYELODYSPLASTIC_SYNDROM_RISK_DN		23	-0.622114	-1.72468	0.0120069	0.0387607	1	2086	tags=48%, list=10%, signal=53%	NA
JAATINEN_HEMATOPOIETIC_STEM_CELL_DN	JAATINEN_HEMATOPOIETIC_STEM_CELL_DN		218	-0.426167	-1.72428	0	0.0388022	1	1459	tags=16%, list=7%, signal=17%	NA
KRIGE_RESPONSE_TO_TOSEDOSTAT_6HR_UP	KRIGE_RESPONSE_TO_TOSEDOSTAT_6HR_UP		883	-0.387378	-1.72339	0	0.0389296	1	3287	tags=36%, list=15%, signal=41%	NA
JOHNSTONE_PARVB_TARGETS_3_DN	JOHNSTONE_PARVB_TARGETS_3_DN		868	-0.387779	-1.72321	0	0.0388482	1	4137	tags=39%, list=19%, signal=47%	NA
BROWNE_HCMV_INFECTION_16HR_DN	BROWNE_HCMV_INFECTION_16HR_DN		84	-0.483577	-1.72078	0.00589102	0.0394935	1	2440	tags=20%, list=11%, signal=23%	NA
FLECHNER_BIOPSY_KIDNEY_TRANSPLANT_REJECTED_VS_OK_DN	FLECHNER_BIOPSY_KIDNEY_TRANSPLANT_REJECTED_VS_OK_DN		537	-0.397408	-1.72072	0	0.0393601	1	3143	tags=28%, list=15%, signal=32%	NA
KOINUMA_TARGETS_OF_SMAD2_OR_SMAD3	KOINUMA_TARGETS_OF_SMAD2_OR_SMAD3		801	-0.390199	-1.71902	0	0.0398132	1	3321	tags=29%, list=15%, signal=33%	NA
COLINA_TARGETS_OF_4EBP1_AND_4EBP2	COLINA_TARGETS_OF_4EBP1_AND_4EBP2		354	-0.406174	-1.71831	0	0.0399348	1	3082	tags=27%, list=14%, signal=31%	NA
NOUSHMEHR_GBM_SILENCED_BY_METHYLATION	NOUSHMEHR_GBM_SILENCED_BY_METHYLATION		47	-0.540281	-1.71721	0.00969305	0.0401516	1	923	tags=15%, list=4%, signal=16%	NA
FLECHNER_PBL_KIDNEY_TRANSPLANT_OK_VS_DONOR_DN	FLECHNER_PBL_KIDNEY_TRANSPLANT_OK_VS_DONOR_DN		41	-0.555902	-1.71672	0.0130293	0.0401519	1	3263	tags=51%, list=15%, signal=60%	NA
SIMBULAN_PARP1_TARGETS_UP	SIMBULAN_PARP1_TARGETS_UP		31	-0.579512	-1.71643	0.0116861	0.0401106	1	1042	tags=26%, list=5%, signal=27%	NA
DACOSTA_UV_RESPONSE_VIA_ERCC3_XPCS_DN	DACOSTA_UV_RESPONSE_VIA_ERCC3_XPCS_DN		85	-0.484385	-1.71486	0.00420757	0.0405826	1	3976	tags=44%, list=18%, signal=53%	NA
LEE_LIVER_CANCER_ACOX1_DN	LEE_LIVER_CANCER_ACOX1_DN		65	-0.501317	-1.71463	0.00473186	0.0405012	1	1806	tags=17%, list=8%, signal=18%	NA
SHIPP_DLBCL_CURED_VS_FATAL_DN	SHIPP_DLBCL_CURED_VS_FATAL_DN		44	-0.545989	-1.71454	0.0170648	0.0403757	1	2074	tags=32%, list=10%, signal=35%	NA
NAKAMURA_ADIPOGENESIS_LATE_UP	NAKAMURA_ADIPOGENESIS_LATE_UP		100	-0.466466	-1.71391	0.00142045	0.0404536	1	2104	tags=25%, list=10%, signal=28%	NA
LEE_LIVER_CANCER_DENA_UP	LEE_LIVER_CANCER_DENA_UP		59	-0.50815	-1.71339	0.00484653	0.0404975	1	2547	tags=29%, list=12%, signal=33%	NA
TAKEDA_TARGETS_OF_NUP98_HOXA9_FUSION_3D_UP	TAKEDA_TARGETS_OF_NUP98_HOXA9_FUSION_3D_UP		173	-0.435674	-1.71273	0.0013587	0.0405753	1	2071	tags=25%, list=10%, signal=28%	NA
BOYLAN_MULTIPLE_MYELOMA_PCA3_UP	BOYLAN_MULTIPLE_MYELOMA_PCA3_UP		75	-0.497073	-1.71171	0.00755287	0.0408048	1	1916	tags=25%, list=9%, signal=28%	NA
SENESE_HDAC1_AND_HDAC2_TARGETS_UP	SENESE_HDAC1_AND_HDAC2_TARGETS_UP		226	-0.430239	-1.70971	0	0.0413742	1	2261	tags=26%, list=10%, signal=28%	NA
GOTTWEIN_TARGETS_OF_KSHV_MIR_K12_11	GOTTWEIN_TARGETS_OF_KSHV_MIR_K12_11		62	-0.504839	-1.70806	0.00633914	0.041887	1	2252	tags=34%, list=10%, signal=38%	NA
SASSON_RESPONSE_TO_FORSKOLIN_DN	SASSON_RESPONSE_TO_FORSKOLIN_DN		87	-0.476109	-1.70576	0.00148588	0.0425706	1	1319	tags=20%, list=6%, signal=21%	NA
AMIT_EGF_RESPONSE_120_MCF10A	AMIT_EGF_RESPONSE_120_MCF10A		42	-0.533704	-1.70434	0.00825082	0.0429654	1	433	tags=19%, list=2%, signal=19%	NA
NUYTTEN_NIPP1_TARGETS_UP	NUYTTEN_NIPP1_TARGETS_UP		739	-0.384472	-1.70411	0	0.0428934	1	4101	tags=33%, list=19%, signal=39%	NA
XU_HGF_TARGETS_INDUCED_BY_AKT1_6HR	XU_HGF_TARGETS_INDUCED_BY_AKT1_6HR		19	-0.646966	-1.70343	0.0163339	0.0429609	1	1925	tags=32%, list=9%, signal=35%	NA
BASSO_CD40_SIGNALING_DN	BASSO_CD40_SIGNALING_DN		64	-0.510082	-1.70265	0.00763359	0.0430891	1	337	tags=16%, list=2%, signal=16%	NA
HOELZEL_NF1_TARGETS_UP	HOELZEL_NF1_TARGETS_UP		132	-0.451425	-1.70164	0	0.0433104	1	2722	tags=24%, list=13%, signal=28%	NA
AMIT_SERUM_RESPONSE_60_MCF10A	AMIT_SERUM_RESPONSE_60_MCF10A		57	-0.518829	-1.70061	0.00321027	0.0435367	1	2030	tags=30%, list=9%, signal=33%	NA
GENTILE_UV_RESPONSE_CLUSTER_D1	GENTILE_UV_RESPONSE_CLUSTER_D1		18	-0.63406	-1.70044	0.021164	0.0434424	1	2377	tags=44%, list=11%, signal=50%	NA
YAGI_AML_SURVIVAL	YAGI_AML_SURVIVAL		124	-0.440546	-1.69888	0.00286123	0.04399	1	1847	tags=23%, list=9%, signal=25%	NA
DANG_REGULATED_BY_MYC_DN	DANG_REGULATED_BY_MYC_DN		250	-0.420459	-1.69792	0	0.0442268	1	2016	tags=23%, list=9%, signal=25%	NA
STOSSI_RESPONSE_TO_ESTRADIOL	STOSSI_RESPONSE_TO_ESTRADIOL		50	-0.528515	-1.69765	0.00956938	0.0442203	1	2663	tags=26%, list=12%, signal=30%	NA
FRASOR_RESPONSE_TO_ESTRADIOL_DN	FRASOR_RESPONSE_TO_ESTRADIOL_DN		78	-0.481129	-1.69743	0.00149031	0.0441534	1	954	tags=18%, list=4%, signal=19%	NA
SENGUPTA_NASOPHARYNGEAL_CARCINOMA_UP	SENGUPTA_NASOPHARYNGEAL_CARCINOMA_UP		286	-0.411351	-1.69718	0.00124378	0.0440692	1	2921	tags=31%, list=13%, signal=35%	NA
PODAR_RESPONSE_TO_ADAPHOSTIN_UP	PODAR_RESPONSE_TO_ADAPHOSTIN_UP		145	-0.442988	-1.69598	0	0.0443557	1	2233	tags=33%, list=10%, signal=37%	NA
RODWELL_AGING_KIDNEY_UP	RODWELL_AGING_KIDNEY_UP		461	-0.394166	-1.69567	0	0.0443207	1	1717	tags=18%, list=8%, signal=19%	NA
SEITZ_NEOPLASTIC_TRANSFORMATION_BY_8P_DELETION_UP	SEITZ_NEOPLASTIC_TRANSFORMATION_BY_8P_DELETION_UP		72	-0.492075	-1.69494	0.00764526	0.0444881	1	2769	tags=26%, list=13%, signal=30%	NA
SESTO_RESPONSE_TO_UV_C5	SESTO_RESPONSE_TO_UV_C5		46	-0.525741	-1.69459	0.00468019	0.0444738	1	2876	tags=43%, list=13%, signal=50%	NA
JECHLINGER_EPITHELIAL_TO_MESENCHYMAL_TRANSITION_DN	JECHLINGER_EPITHELIAL_TO_MESENCHYMAL_TRANSITION_DN		66	-0.499599	-1.69447	0.00613497	0.0443691	1	1747	tags=17%, list=8%, signal=18%	NA
BRACHAT_RESPONSE_TO_METHOTREXATE_UP	BRACHAT_RESPONSE_TO_METHOTREXATE_UP		25	-0.587408	-1.69388	0.0193322	0.0444523	1	1727	tags=40%, list=8%, signal=43%	NA
ABE_VEGFA_TARGETS_2HR	ABE_VEGFA_TARGETS_2HR		33	-0.561771	-1.69361	0.0211382	0.0444276	1	1042	tags=21%, list=5%, signal=22%	NA
SAFFORD_T_LYMPHOCYTE_ANERGY	SAFFORD_T_LYMPHOCYTE_ANERGY		87	-0.471199	-1.69325	0.00289017	0.0444169	1	3387	tags=37%, list=16%, signal=43%	NA
XU_HGF_TARGETS_INDUCED_BY_AKT1_48HR_DN	XU_HGF_TARGETS_INDUCED_BY_AKT1_48HR_DN		27	-0.580716	-1.69217	0.014827	0.0446328	1	2786	tags=48%, list=13%, signal=55%	NA
PETRETTO_CARDIAC_HYPERTROPHY	PETRETTO_CARDIAC_HYPERTROPHY		33	-0.559434	-1.69199	0.00833333	0.0445296	1	2529	tags=33%, list=12%, signal=38%	NA
TAVOR_CEBPA_TARGETS_UP	TAVOR_CEBPA_TARGETS_UP		48	-0.524295	-1.69178	0.0033389	0.0445121	1	1119	tags=33%, list=5%, signal=35%	NA
CROONQUIST_NRAS_SIGNALING_UP	CROONQUIST_NRAS_SIGNALING_UP		41	-0.537326	-1.69108	0.0148026	0.044587	1	2478	tags=44%, list=11%, signal=49%	NA
LABBE_WNT3A_TARGETS_DN	LABBE_WNT3A_TARGETS_DN		96	-0.467165	-1.69077	0.00304414	0.0445154	1	909	tags=13%, list=4%, signal=13%	NA
BAE_BRCA1_TARGETS_DN	BAE_BRCA1_TARGETS_DN		32	-0.565048	-1.6901	0.0146341	0.0446326	1	2143	tags=34%, list=10%, signal=38%	NA
SWEET_LUNG_CANCER_KRAS_UP	SWEET_LUNG_CANCER_KRAS_UP		480	-0.392412	-1.68968	0	0.0446113	1	2644	tags=23%, list=12%, signal=26%	NA
TIAN_TNF_SIGNALING_VIA_NFKB	TIAN_TNF_SIGNALING_VIA_NFKB		28	-0.59994	-1.68938	0.0297723	0.0445639	1	966	tags=29%, list=4%, signal=30%	NA
SCHUETZ_BREAST_CANCER_DUCTAL_INVASIVE_UP	SCHUETZ_BREAST_CANCER_DUCTAL_INVASIVE_UP		337	-0.402217	-1.68701	0	0.0452612	1	2103	tags=21%, list=10%, signal=23%	NA
LI_WILMS_TUMOR_VS_FETAL_KIDNEY_1_UP	LI_WILMS_TUMOR_VS_FETAL_KIDNEY_1_UP		181	-0.429942	-1.68676	0	0.0452322	1	2459	tags=28%, list=11%, signal=31%	NA
LEIN_CEREBELLUM_MARKERS	LEIN_CEREBELLUM_MARKERS		80	-0.480591	-1.68665	0.00596125	0.045146	1	2469	tags=16%, list=11%, signal=18%	NA
ZHAN_V1_LATE_DIFFERENTIATION_GENES_UP	ZHAN_V1_LATE_DIFFERENTIATION_GENES_UP		32	-0.566527	-1.68649	0.0116086	0.0450672	1	1856	tags=28%, list=9%, signal=31%	NA
YANG_BCL3_TARGETS_UP	YANG_BCL3_TARGETS_UP		353	-0.398083	-1.68574	0	0.045252	1	2379	tags=23%, list=11%, signal=25%	NA
SANDERSON_PPARA_TARGETS	SANDERSON_PPARA_TARGETS		15	-0.667853	-1.68551	0.0209059	0.0451739	1	3840	tags=53%, list=18%, signal=65%	NA
MASRI_RESISTANCE_TO_TAMOXIFEN_AND_AROMATASE_INHIBITORS_UP	MASRI_RESISTANCE_TO_TAMOXIFEN_AND_AROMATASE_INHIBITORS_UP		19	-0.648376	-1.68522	0.0165746	0.045191	1	341	tags=16%, list=2%, signal=16%	NA
ZEMBUTSU_SENSITIVITY_TO_CISPLATIN	ZEMBUTSU_SENSITIVITY_TO_CISPLATIN		18	-0.644019	-1.68459	0.0175439	0.0452994	1	1799	tags=33%, list=8%, signal=36%	NA
BORCZUK_MALIGNANT_MESOTHELIOMA_DN	BORCZUK_MALIGNANT_MESOTHELIOMA_DN		97	-0.466265	-1.68411	0.00146628	0.0453158	1	1610	tags=19%, list=7%, signal=20%	NA
PRAMOONJAGO_SOX4_TARGETS_UP	PRAMOONJAGO_SOX4_TARGETS_UP		52	-0.508737	-1.68286	0.00650406	0.0456726	1	2597	tags=42%, list=12%, signal=48%	NA
BURTON_ADIPOGENESIS_6	BURTON_ADIPOGENESIS_6		184	-0.426987	-1.68266	0.00132979	0.045578	1	2615	tags=26%, list=12%, signal=29%	NA
CREIGHTON_ENDOCRINE_THERAPY_RESISTANCE_5	CREIGHTON_ENDOCRINE_THERAPY_RESISTANCE_5		448	-0.391552	-1.68219	0	0.045639	1	2945	tags=29%, list=14%, signal=33%	NA
MASSARWEH_TAMOXIFEN_RESISTANCE_UP	MASSARWEH_TAMOXIFEN_RESISTANCE_UP		544	-0.387822	-1.68169	0	0.0456482	1	3473	tags=31%, list=16%, signal=36%	NA
LEE_LIVER_CANCER_MYC_DN	LEE_LIVER_CANCER_MYC_DN		61	-0.49913	-1.68157	0.00477707	0.0455545	1	2187	tags=20%, list=10%, signal=22%	NA
CHOI_ATL_CHRONIC_VS_ACUTE_DN	CHOI_ATL_CHRONIC_VS_ACUTE_DN		18	-0.630445	-1.67983	0.0175131	0.0460127	1	3205	tags=50%, list=15%, signal=59%	NA
GENTILE_UV_HIGH_DOSE_DN	GENTILE_UV_HIGH_DOSE_DN		306	-0.402164	-1.67973	0	0.0459215	1	3150	tags=32%, list=15%, signal=37%	NA
HAHTOLA_MYCOSIS_FUNGOIDES_SKIN_DN	HAHTOLA_MYCOSIS_FUNGOIDES_SKIN_DN		26	-0.600823	-1.6792	0.0166667	0.0459866	1	3351	tags=50%, list=15%, signal=59%	NA
BROWNE_HCMV_INFECTION_20HR_DN	BROWNE_HCMV_INFECTION_20HR_DN		99	-0.458678	-1.67739	0.00146628	0.0465961	1	3262	tags=36%, list=15%, signal=43%	NA
RUTELLA_RESPONSE_TO_HGF_UP	RUTELLA_RESPONSE_TO_HGF_UP		404	-0.396072	-1.67685	0	0.0466429	1	2456	tags=25%, list=11%, signal=28%	NA
ZHAN_MULTIPLE_MYELOMA_CD1_AND_CD2_UP	ZHAN_MULTIPLE_MYELOMA_CD1_AND_CD2_UP		86	-0.46651	-1.67579	0.0030581	0.0470107	1	4016	tags=43%, list=19%, signal=53%	NA
YANAGIHARA_ESX1_TARGETS	YANAGIHARA_ESX1_TARGETS		29	-0.574323	-1.67253	0.010274	0.0481669	1	2246	tags=34%, list=10%, signal=38%	NA
BONOME_OVARIAN_CANCER_POOR_SURVIVAL_UP	BONOME_OVARIAN_CANCER_POOR_SURVIVAL_UP		31	-0.562627	-1.67225	0.0156794	0.0481274	1	2520	tags=42%, list=12%, signal=47%	NA
SASSON_RESPONSE_TO_GONADOTROPHINS_DN	SASSON_RESPONSE_TO_GONADOTROPHINS_DN		86	-0.470521	-1.67214	0.00590842	0.0480351	1	2205	tags=26%, list=10%, signal=28%	NA
ZHAN_MULTIPLE_MYELOMA_CD1_VS_CD2_DN	ZHAN_MULTIPLE_MYELOMA_CD1_VS_CD2_DN		48	-0.519039	-1.67119	0.00478469	0.0482918	1	2213	tags=31%, list=10%, signal=35%	NA
HERNANDEZ_ABERRANT_MITOSIS_BY_DOCETACEL_4NM_UP	HERNANDEZ_ABERRANT_MITOSIS_BY_DOCETACEL_4NM_UP		23	-0.597557	-1.67088	0.0106952	0.0482486	1	1723	tags=30%, list=8%, signal=33%	NA
BAELDE_DIABETIC_NEPHROPATHY_DN	BAELDE_DIABETIC_NEPHROPATHY_DN		428	-0.39206	-1.67058	0	0.0482	1	2993	tags=31%, list=14%, signal=35%	NA
CHARAFE_BREAST_CANCER_LUMINAL_VS_BASAL_DN	CHARAFE_BREAST_CANCER_LUMINAL_VS_BASAL_DN		435	-0.391308	-1.66983	0	0.0483521	1	2079	tags=25%, list=10%, signal=27%	NA
ZHANG_PROLIFERATING_VS_QUIESCENT	ZHANG_PROLIFERATING_VS_QUIESCENT		51	-0.503497	-1.66976	0.00466563	0.0482481	1	1969	tags=29%, list=9%, signal=32%	NA
KYNG_DNA_DAMAGE_BY_UV	KYNG_DNA_DAMAGE_BY_UV		62	-0.483574	-1.66923	0.0155039	0.0483097	1	3974	tags=47%, list=18%, signal=57%	NA
BROWNE_HCMV_INFECTION_30MIN_UP	BROWNE_HCMV_INFECTION_30MIN_UP		53	-0.50445	-1.66914	0.00802568	0.0482033	1	166	tags=8%, list=1%, signal=8%	NA
TCGA_GLIOBLASTOMA_COPY_NUMBER_DN	TCGA_GLIOBLASTOMA_COPY_NUMBER_DN		29	-0.568979	-1.66868	0.0205128	0.0482312	1	2774	tags=38%, list=13%, signal=43%	NA
RADAEVA_RESPONSE_TO_IFNA1_UP	RADAEVA_RESPONSE_TO_IFNA1_UP		52	-0.506825	-1.66801	0.0138462	0.0482983	1	2630	tags=33%, list=12%, signal=37%	NA
JI_RESPONSE_TO_FSH_UP	JI_RESPONSE_TO_FSH_UP		73	-0.478057	-1.66702	0.00473186	0.0485596	1	2470	tags=27%, list=11%, signal=31%	NA
WANG_CISPLATIN_RESPONSE_AND_XPC_DN	WANG_CISPLATIN_RESPONSE_AND_XPC_DN		223	-0.417992	-1.66678	0	0.0485384	1	3392	tags=34%, list=16%, signal=39%	NA
HIRSCH_CELLULAR_TRANSFORMATION_SIGNATURE_UP	HIRSCH_CELLULAR_TRANSFORMATION_SIGNATURE_UP		237	-0.412539	-1.66531	0	0.0490078	1	3906	tags=38%, list=18%, signal=45%	NA
WANG_LMO4_TARGETS_DN	WANG_LMO4_TARGETS_DN		334	-0.40051	-1.66486	0.00119332	0.0490485	1	3375	tags=34%, list=16%, signal=39%	NA
GRADE_COLON_CANCER_DN	GRADE_COLON_CANCER_DN		32	-0.550002	-1.66318	0.015411	0.0495394	1	3252	tags=47%, list=15%, signal=55%	NA
KYNG_NORMAL_AGING_DN	KYNG_NORMAL_AGING_DN		28	-0.564462	-1.66223	0.0224525	0.0498043	1	2843	tags=46%, list=13%, signal=53%	NA
SANSOM_APC_TARGETS_DN	SANSOM_APC_TARGETS_DN		357	-0.396045	-1.66031	0	0.0504024	1	2128	tags=18%, list=10%, signal=20%	NA
FRASOR_TAMOXIFEN_RESPONSE_UP	FRASOR_TAMOXIFEN_RESPONSE_UP		50	-0.520437	-1.65937	0.00958466	0.0506787	1	2631	tags=34%, list=12%, signal=39%	NA
ZHU_CMV_8_HR_UP	ZHU_CMV_8_HR_UP		47	-0.514253	-1.65904	0.00958466	0.0506369	1	3378	tags=34%, list=16%, signal=40%	NA
MARSON_FOXP3_TARGETS_DN	MARSON_FOXP3_TARGETS_DN		53	-0.502286	-1.65739	0.010084	0.0511969	1	1352	tags=23%, list=6%, signal=24%	NA
DASU_IL6_SIGNALING_SCAR_DN	DASU_IL6_SIGNALING_SCAR_DN		16	-0.634779	-1.65597	0.0266904	0.051653	1	1518	tags=38%, list=7%, signal=40%	NA
SANA_TNF_SIGNALING_DN	SANA_TNF_SIGNALING_DN		89	-0.45962	-1.65566	0.00285714	0.0516056	1	2024	tags=18%, list=9%, signal=20%	NA
PENG_GLUTAMINE_DEPRIVATION_UP	PENG_GLUTAMINE_DEPRIVATION_UP		38	-0.536637	-1.65431	0.00833333	0.0520083	1	1789	tags=32%, list=8%, signal=34%	NA
BERENJENO_TRANSFORMED_BY_RHOA_REVERSIBLY_DN	BERENJENO_TRANSFORMED_BY_RHOA_REVERSIBLY_DN		29	-0.569867	-1.65377	0.0290598	0.0521198	1	502	tags=21%, list=2%, signal=21%	NA
JISON_SICKLE_CELL_DISEASE_UP	JISON_SICKLE_CELL_DISEASE_UP		177	-0.420008	-1.65373	0	0.0519904	1	3180	tags=33%, list=15%, signal=39%	NA
GRAESSMANN_RESPONSE_TO_MC_AND_SERUM_DEPRIVATION_UP	GRAESSMANN_RESPONSE_TO_MC_AND_SERUM_DEPRIVATION_UP		207	-0.413576	-1.65145	0	0.052837	1	3199	tags=27%, list=15%, signal=31%	NA
DELYS_THYROID_CANCER_UP	DELYS_THYROID_CANCER_UP		441	-0.383292	-1.65041	0	0.053145	1	1760	tags=16%, list=8%, signal=17%	NA
GREGORY_SYNTHETIC_LETHAL_WITH_IMATINIB	GREGORY_SYNTHETIC_LETHAL_WITH_IMATINIB		143	-0.429919	-1.64987	0.00409277	0.0532155	1	3457	tags=31%, list=16%, signal=37%	NA
MILI_PSEUDOPODIA_CHEMOTAXIS_UP	MILI_PSEUDOPODIA_CHEMOTAXIS_UP		71	-0.486341	-1.64975	0.00304414	0.0531105	1	3871	tags=48%, list=18%, signal=58%	NA
CEBALLOS_TARGETS_OF_TP53_AND_MYC_DN	CEBALLOS_TARGETS_OF_TP53_AND_MYC_DN		38	-0.545097	-1.64889	0.00829187	0.0533387	1	2621	tags=29%, list=12%, signal=33%	NA
FINETTI_BREAST_CANCER_KINOME_GREEN	FINETTI_BREAST_CANCER_KINOME_GREEN		16	-0.645675	-1.64888	0.0366089	0.053191	1	637	tags=19%, list=3%, signal=19%	NA
XU_HGF_SIGNALING_NOT_VIA_AKT1_6HR	XU_HGF_SIGNALING_NOT_VIA_AKT1_6HR		26	-0.581934	-1.64868	0.0157343	0.0531497	1	2710	tags=42%, list=13%, signal=48%	NA
LEE_LIVER_CANCER_MYC_E2F1_DN	LEE_LIVER_CANCER_MYC_E2F1_DN		62	-0.484524	-1.6481	0.00924499	0.0532475	1	1806	tags=21%, list=8%, signal=23%	NA
GARGALOVIC_RESPONSE_TO_OXIDIZED_PHOSPHOLIPIDS_BLACK_UP	GARGALOVIC_RESPONSE_TO_OXIDIZED_PHOSPHOLIPIDS_BLACK_UP		33	-0.54189	-1.64743	0.0190641	0.0533931	1	1353	tags=30%, list=6%, signal=32%	NA
THUM_SYSTOLIC_HEART_FAILURE_DN	THUM_SYSTOLIC_HEART_FAILURE_DN		215	-0.412848	-1.64736	0	0.053275	1	3587	tags=36%, list=17%, signal=42%	NA
PLASARI_TGFB1_TARGETS_10HR_DN	PLASARI_TGFB1_TARGETS_10HR_DN		241	-0.403749	-1.64722	0	0.0531884	1	1719	tags=17%, list=8%, signal=18%	NA
ZHENG_FOXP3_TARGETS_IN_T_LYMPHOCYTE_DN	ZHENG_FOXP3_TARGETS_IN_T_LYMPHOCYTE_DN		35	-0.53743	-1.64675	0.0211382	0.0532319	1	3434	tags=46%, list=16%, signal=54%	NA
KUROZUMI_RESPONSE_TO_ONCOCYTIC_VIRUS	KUROZUMI_RESPONSE_TO_ONCOCYTIC_VIRUS		44	-0.5261	-1.64675	0.0163666	0.0530872	1	306	tags=18%, list=1%, signal=18%	NA
MARTINEZ_RB1_TARGETS_UP	MARTINEZ_RB1_TARGETS_UP		656	-0.374386	-1.64648	0	0.0530327	1	2841	tags=24%, list=13%, signal=27%	NA
OUILLETTE_CLL_13Q14_DELETION_UP	OUILLETTE_CLL_13Q14_DELETION_UP		71	-0.475653	-1.64606	0.00464396	0.0530565	1	3322	tags=39%, list=15%, signal=46%	NA
WILCOX_RESPONSE_TO_PROGESTERONE_UP	WILCOX_RESPONSE_TO_PROGESTERONE_UP		146	-0.431218	-1.64482	0.00277393	0.0534194	1	3025	tags=29%, list=14%, signal=34%	NA
MORI_SMALL_PRE_BII_LYMPHOCYTE_UP	MORI_SMALL_PRE_BII_LYMPHOCYTE_UP		82	-0.465412	-1.64375	0.012012	0.0537311	1	4248	tags=40%, list=20%, signal=50%	NA
GAVIN_FOXP3_TARGETS_CLUSTER_P7	GAVIN_FOXP3_TARGETS_CLUSTER_P7		86	-0.461619	-1.643	0.0089955	0.0539352	1	2084	tags=26%, list=10%, signal=28%	NA
GENTILE_UV_HIGH_DOSE_UP	GENTILE_UV_HIGH_DOSE_UP		25	-0.588878	-1.64271	0.0180505	0.053904	1	1925	tags=28%, list=9%, signal=31%	NA
PYEON_CANCER_HEAD_AND_NECK_VS_CERVICAL_UP	PYEON_CANCER_HEAD_AND_NECK_VS_CERVICAL_UP		179	-0.420718	-1.64133	0	0.0543787	1	4810	tags=49%, list=22%, signal=62%	NA
MANALO_HYPOXIA_UP	MANALO_HYPOXIA_UP		204	-0.411371	-1.6408	0	0.0544696	1	2910	tags=27%, list=13%, signal=31%	NA
HOEBEKE_LYMPHOID_STEM_CELL_UP	HOEBEKE_LYMPHOID_STEM_CELL_UP		91	-0.457408	-1.64043	0.00292826	0.0544866	1	1927	tags=29%, list=9%, signal=31%	NA
PLASARI_TGFB1_TARGETS_1HR_UP	PLASARI_TGFB1_TARGETS_1HR_UP		34	-0.538404	-1.63952	0.0284281	0.0547927	1	2998	tags=29%, list=14%, signal=34%	NA
KANG_CISPLATIN_RESISTANCE_UP	KANG_CISPLATIN_RESISTANCE_UP		18	-0.624942	-1.63846	0.0181159	0.0551408	1	3157	tags=56%, list=15%, signal=65%	NA
SCIBETTA_KDM5B_TARGETS_UP	SCIBETTA_KDM5B_TARGETS_UP		17	-0.634694	-1.63803	0.0326087	0.0551399	1	2152	tags=35%, list=10%, signal=39%	NA
CONCANNON_APOPTOSIS_BY_EPOXOMICIN_UP	CONCANNON_APOPTOSIS_BY_EPOXOMICIN_UP		237	-0.403563	-1.63794	0.00127877	0.0550249	1	1952	tags=23%, list=9%, signal=25%	NA
HUTTMANN_B_CLL_POOR_SURVIVAL_DN	HUTTMANN_B_CLL_POOR_SURVIVAL_DN		58	-0.493098	-1.6372	0.00953895	0.0552587	1	2860	tags=40%, list=13%, signal=46%	NA
YAMAZAKI_TCEB3_TARGETS_UP	YAMAZAKI_TCEB3_TARGETS_UP		172	-0.417931	-1.63664	0.0027027	0.0553522	1	2815	tags=23%, list=13%, signal=27%	NA
WINTER_HYPOXIA_DN	WINTER_HYPOXIA_DN		49	-0.510654	-1.63588	0.0170015	0.055549	1	1804	tags=31%, list=8%, signal=33%	NA
ONDER_CDH1_TARGETS_3_DN	ONDER_CDH1_TARGETS_3_DN		58	-0.485806	-1.6319	0.0238095	0.057196	1	1453	tags=16%, list=7%, signal=17%	NA
CAVARD_LIVER_CANCER_MALIGNANT_VS_BENIGN	CAVARD_LIVER_CANCER_MALIGNANT_VS_BENIGN		31	-0.556276	-1.63041	0.0238095	0.0576867	1	863	tags=19%, list=4%, signal=20%	NA
AKL_HTLV1_INFECTION_DN	AKL_HTLV1_INFECTION_DN		66	-0.473017	-1.62863	0.0170807	0.0582493	1	2662	tags=30%, list=12%, signal=34%	NA
ZHAN_MULTIPLE_MYELOMA_CD2_UP	ZHAN_MULTIPLE_MYELOMA_CD2_UP		44	-0.515959	-1.62735	0.0144231	0.058724	1	3377	tags=34%, list=16%, signal=40%	NA
BERNARD_PPAPDC1B_TARGETS_DN	BERNARD_PPAPDC1B_TARGETS_DN		53	-0.498768	-1.62694	0.0116861	0.0587856	1	1953	tags=26%, list=9%, signal=29%	NA
WIERENGA_STAT5A_TARGETS_UP	WIERENGA_STAT5A_TARGETS_UP		211	-0.407803	-1.62656	0	0.0587987	1	2245	tags=23%, list=10%, signal=25%	NA
SCHAEFFER_PROSTATE_DEVELOPMENT_6HR_DN	SCHAEFFER_PROSTATE_DEVELOPMENT_6HR_DN		490	-0.376486	-1.62633	0	0.0587512	1	3370	tags=30%, list=16%, signal=34%	NA
HUANG_FOXA2_TARGETS_DN	HUANG_FOXA2_TARGETS_DN		36	-0.541591	-1.62585	0.0187713	0.0588379	1	1042	tags=19%, list=5%, signal=20%	NA
SAKAI_TUMOR_INFILTRATING_MONOCYTES_UP	SAKAI_TUMOR_INFILTRATING_MONOCYTES_UP		27	-0.56907	-1.62448	0.0301508	0.0592369	1	1270	tags=19%, list=6%, signal=20%	NA
SAKAI_TUMOR_INFILTRATING_MONOCYTES_DN	SAKAI_TUMOR_INFILTRATING_MONOCYTES_DN		80	-0.455794	-1.62402	0.00298507	0.0593116	1	3563	tags=35%, list=16%, signal=42%	NA
BARRIER_CANCER_RELAPSE_TUMOR_SAMPLE_UP	BARRIER_CANCER_RELAPSE_TUMOR_SAMPLE_UP		16	-0.6319	-1.62364	0.0274725	0.0594071	1	2848	tags=50%, list=13%, signal=58%	NA
LABBE_TGFB1_TARGETS_DN	LABBE_TGFB1_TARGETS_DN		105	-0.442702	-1.62337	0.00570613	0.0593716	1	2136	tags=15%, list=10%, signal=17%	NA
NEMETH_INFLAMMATORY_RESPONSE_LPS_UP	NEMETH_INFLAMMATORY_RESPONSE_LPS_UP		88	-0.446546	-1.62317	0.00451128	0.0593156	1	2074	tags=31%, list=10%, signal=34%	NA
GENTILE_UV_LOW_DOSE_UP	GENTILE_UV_LOW_DOSE_UP		27	-0.568547	-1.62262	0.0344828	0.059413	1	1202	tags=33%, list=6%, signal=35%	NA
WARTERS_RESPONSE_TO_IR_SKIN	WARTERS_RESPONSE_TO_IR_SKIN		78	-0.461847	-1.62232	0.00593472	0.0594166	1	2356	tags=28%, list=11%, signal=32%	NA
RAMALHO_STEMNESS_UP	RAMALHO_STEMNESS_UP		202	-0.407638	-1.62127	0	0.0597626	1	3727	tags=39%, list=17%, signal=46%	NA
DAZARD_RESPONSE_TO_UV_SCC_UP	DAZARD_RESPONSE_TO_UV_SCC_UP		118	-0.435322	-1.62029	0.00417827	0.0600869	1	3596	tags=43%, list=17%, signal=52%	NA
GAUSSMANN_MLL_AF4_FUSION_TARGETS_G_UP	GAUSSMANN_MLL_AF4_FUSION_TARGETS_G_UP		225	-0.40146	-1.62023	0	0.0599607	1	1882	tags=16%, list=9%, signal=17%	NA
PHONG_TNF_RESPONSE_NOT_VIA_P38	PHONG_TNF_RESPONSE_NOT_VIA_P38		333	-0.382195	-1.61987	0	0.0599936	1	2187	tags=24%, list=10%, signal=26%	NA
XU_GH1_AUTOCRINE_TARGETS_DN	XU_GH1_AUTOCRINE_TARGETS_DN		135	-0.42842	-1.61982	0.00831025	0.0598655	1	3207	tags=29%, list=15%, signal=34%	NA
BUCKANOVICH_T_LYMPHOCYTE_HOMING_ON_TUMOR_UP	BUCKANOVICH_T_LYMPHOCYTE_HOMING_ON_TUMOR_UP		21	-0.60019	-1.61975	0.0282187	0.059756	1	4867	tags=67%, list=22%, signal=86%	NA
NADLER_OBESITY_UP	NADLER_OBESITY_UP		59	-0.488019	-1.61781	0.0141732	0.0605795	1	1251	tags=25%, list=6%, signal=27%	NA
GUILLAUMOND_KLF10_TARGETS_DN	GUILLAUMOND_KLF10_TARGETS_DN		30	-0.539903	-1.61605	0.0189983	0.0611904	1	3440	tags=37%, list=16%, signal=44%	NA
EBAUER_MYOGENIC_TARGETS_OF_PAX3_FOXO1_FUSION	EBAUER_MYOGENIC_TARGETS_OF_PAX3_FOXO1_FUSION		50	-0.501581	-1.616	0.0189573	0.0610531	1	2205	tags=20%, list=10%, signal=22%	NA
IKEDA_MIR133_TARGETS_UP	IKEDA_MIR133_TARGETS_UP		43	-0.506842	-1.61583	0.0115702	0.0609968	1	1818	tags=33%, list=8%, signal=35%	NA
GOZGIT_ESR1_TARGETS_DN	GOZGIT_ESR1_TARGETS_DN		710	-0.369236	-1.61517	0	0.0611701	1	2844	tags=20%, list=13%, signal=23%	NA
GARY_CD5_TARGETS_UP	GARY_CD5_TARGETS_UP		461	-0.373078	-1.61504	0	0.061074	1	3169	tags=29%, list=15%, signal=33%	NA
SUH_COEXPRESSED_WITH_ID1_AND_ID2_UP	SUH_COEXPRESSED_WITH_ID1_AND_ID2_UP		18	-0.611109	-1.61385	0.040367	0.061567	1	1919	tags=39%, list=9%, signal=43%	NA
BOYLAN_MULTIPLE_MYELOMA_C_D_DN	BOYLAN_MULTIPLE_MYELOMA_C_D_DN		245	-0.397013	-1.61258	0	0.0620025	1	2630	tags=24%, list=12%, signal=27%	NA
KLEIN_TARGETS_OF_BCR_ABL1_FUSION	KLEIN_TARGETS_OF_BCR_ABL1_FUSION		44	-0.515543	-1.61257	0.019802	0.0618603	1	828	tags=18%, list=4%, signal=19%	NA
KAMIKUBO_MYELOID_CEBPA_NETWORK	KAMIKUBO_MYELOID_CEBPA_NETWORK		28	-0.552661	-1.61227	0.0211726	0.0618627	1	1120	tags=32%, list=5%, signal=34%	NA
MOSERLE_IFNA_RESPONSE	MOSERLE_IFNA_RESPONSE		31	-0.53924	-1.61081	0.0224525	0.0624528	1	3199	tags=42%, list=15%, signal=49%	NA
VERNELL_RETINOBLASTOMA_PATHWAY_DN	VERNELL_RETINOBLASTOMA_PATHWAY_DN		22	-0.576902	-1.60854	0.0339893	0.0634157	1	2074	tags=32%, list=10%, signal=35%	NA
WANG_LMO4_TARGETS_UP	WANG_LMO4_TARGETS_UP		345	-0.385578	-1.60845	0	0.0633085	1	3011	tags=28%, list=14%, signal=32%	NA
GARGALOVIC_RESPONSE_TO_OXIDIZED_PHOSPHOLIPIDS_YELLOW_DN	GARGALOVIC_RESPONSE_TO_OXIDIZED_PHOSPHOLIPIDS_YELLOW_DN		19	-0.602036	-1.60514	0.0282187	0.0647838	1	1143	tags=37%, list=5%, signal=39%	NA
CHIARADONNA_NEOPLASTIC_TRANSFORMATION_KRAS_UP	CHIARADONNA_NEOPLASTIC_TRANSFORMATION_KRAS_UP		125	-0.430993	-1.60493	0.0074184	0.06474	1	2920	tags=30%, list=13%, signal=34%	NA
JAZAG_TGFB1_SIGNALING_VIA_SMAD4_DN	JAZAG_TGFB1_SIGNALING_VIA_SMAD4_DN		65	-0.466463	-1.6037	0.0137405	0.0652455	1	1054	tags=17%, list=5%, signal=18%	NA
LEE_NEURAL_CREST_STEM_CELL_DN	LEE_NEURAL_CREST_STEM_CELL_DN		114	-0.436328	-1.60252	0.00141044	0.0657021	1	1278	tags=19%, list=6%, signal=20%	NA
SESTO_RESPONSE_TO_UV_C3	SESTO_RESPONSE_TO_UV_C3		20	-0.59659	-1.60232	0.0331492	0.0656348	1	1723	tags=35%, list=8%, signal=38%	NA
HAHTOLA_CTCL_CUTANEOUS	HAHTOLA_CTCL_CUTANEOUS		25	-0.573497	-1.60154	0.033275	0.0659029	1	1723	tags=28%, list=8%, signal=30%	NA
BURTON_ADIPOGENESIS_9	BURTON_ADIPOGENESIS_9		92	-0.442812	-1.6014	0.00295858	0.065806	1	2584	tags=28%, list=12%, signal=32%	NA
ACEVEDO_LIVER_CANCER_UP	ACEVEDO_LIVER_CANCER_UP		927	-0.358721	-1.60049	0	0.0660967	1	4257	tags=35%, list=20%, signal=42%	NA
SHARMA_PILOCYTIC_ASTROCYTOMA_LOCATION_UP	SHARMA_PILOCYTIC_ASTROCYTOMA_LOCATION_UP		24	-0.570895	-1.60032	0.0386643	0.0660386	1	3071	tags=29%, list=14%, signal=34%	NA
WOTTON_RUNX_TARGETS_DN	WOTTON_RUNX_TARGETS_DN		28	-0.553835	-1.59939	0.0332168	0.0663716	1	606	tags=14%, list=3%, signal=15%	NA
THEILGAARD_NEUTROPHIL_AT_SKIN_WOUND_UP	THEILGAARD_NEUTROPHIL_AT_SKIN_WOUND_UP		77	-0.454354	-1.59926	0.0137825	0.0662697	1	2617	tags=31%, list=12%, signal=35%	NA
RODRIGUES_THYROID_CARCINOMA_POORLY_DIFFERENTIATED_DN	RODRIGUES_THYROID_CARCINOMA_POORLY_DIFFERENTIATED_DN		724	-0.36337	-1.59801	0	0.0667131	1	3690	tags=31%, list=17%, signal=36%	NA
BOGNI_TREATMENT_RELATED_MYELOID_LEUKEMIA_DN	BOGNI_TREATMENT_RELATED_MYELOID_LEUKEMIA_DN		31	-0.534133	-1.59789	0.0238908	0.0666154	1	4207	tags=55%, list=19%, signal=68%	NA
GINESTIER_BREAST_CANCER_20Q13_AMPLIFICATION_UP	GINESTIER_BREAST_CANCER_20Q13_AMPLIFICATION_UP		113	-0.432084	-1.59728	0.0070028	0.0667342	1	4060	tags=38%, list=19%, signal=47%	NA
HAN_SATB1_TARGETS_DN	HAN_SATB1_TARGETS_DN		432	-0.373815	-1.59725	0	0.0665873	1	3469	tags=30%, list=16%, signal=35%	NA
PICCALUGA_ANGIOIMMUNOBLASTIC_LYMPHOMA_DN	PICCALUGA_ANGIOIMMUNOBLASTIC_LYMPHOMA_DN		129	-0.42009	-1.59663	0.00958904	0.0667523	1	3754	tags=46%, list=17%, signal=55%	NA
RICKMAN_TUMOR_DIFFERENTIATED_WELL_VS_MODERATELY_UP	RICKMAN_TUMOR_DIFFERENTIATED_WELL_VS_MODERATELY_UP		102	-0.432704	-1.59641	0.00712251	0.0667414	1	1884	tags=25%, list=9%, signal=28%	NA
GROSS_HYPOXIA_VIA_HIF1A_DN	GROSS_HYPOXIA_VIA_HIF1A_DN		107	-0.431237	-1.59523	0.00429799	0.0671604	1	4005	tags=36%, list=18%, signal=43%	NA
HELLEBREKERS_SILENCED_DURING_TUMOR_ANGIOGENESIS	HELLEBREKERS_SILENCED_DURING_TUMOR_ANGIOGENESIS		80	-0.452354	-1.5949	0.00745157	0.0672051	1	1042	tags=18%, list=5%, signal=18%	NA
NAGASHIMA_NRG1_SIGNALING_DN	NAGASHIMA_NRG1_SIGNALING_DN		54	-0.481368	-1.59419	0.0191693	0.0674072	1	3106	tags=33%, list=14%, signal=39%	NA
HEDENFALK_BREAST_CANCER_BRACX_UP	HEDENFALK_BREAST_CANCER_BRACX_UP		20	-0.596061	-1.59395	0.0255537	0.0673638	1	2968	tags=35%, list=14%, signal=41%	NA
KYNG_WERNER_SYNDROM_AND_NORMAL_AGING_DN	KYNG_WERNER_SYNDROM_AND_NORMAL_AGING_DN		220	-0.394832	-1.59323	0.00126582	0.0675623	1	2894	tags=24%, list=13%, signal=28%	NA
TAKEDA_TARGETS_OF_NUP98_HOXA9_FUSION_16D_DN	TAKEDA_TARGETS_OF_NUP98_HOXA9_FUSION_16D_DN		126	-0.426063	-1.59321	0.00573888	0.0674301	1	1745	tags=20%, list=8%, signal=21%	NA
FLOTHO_PEDIATRIC_ALL_THERAPY_RESPONSE_UP	FLOTHO_PEDIATRIC_ALL_THERAPY_RESPONSE_UP		53	-0.479651	-1.59275	0.0174881	0.0675062	1	4148	tags=34%, list=19%, signal=42%	NA
BOQUEST_STEM_CELL_DN	BOQUEST_STEM_CELL_DN		213	-0.400275	-1.592	0	0.0677495	1	2288	tags=18%, list=11%, signal=20%	NA
HOSHIDA_LIVER_CANCER_SUBCLASS_S1	HOSHIDA_LIVER_CANCER_SUBCLASS_S1		235	-0.397868	-1.59075	0	0.0682761	1	2077	tags=24%, list=10%, signal=26%	NA
ZWANG_CLASS_1_TRANSIENTLY_INDUCED_BY_EGF	ZWANG_CLASS_1_TRANSIENTLY_INDUCED_BY_EGF		483	-0.369033	-1.59074	0	0.068125	1	2374	tags=22%, list=11%, signal=24%	NA
CHESLER_BRAIN_HIGHEST_EXPRESSION	CHESLER_BRAIN_HIGHEST_EXPRESSION		37	-0.526203	-1.5897	0.0277325	0.0685536	1	4404	tags=49%, list=20%, signal=61%	NA
GALE_APL_WITH_FLT3_MUTATED_UP	GALE_APL_WITH_FLT3_MUTATED_UP		56	-0.486851	-1.58948	0.0173228	0.0685273	1	4013	tags=54%, list=19%, signal=66%	NA
RAO_BOUND_BY_SALL4_ISOFORM_B	RAO_BOUND_BY_SALL4_ISOFORM_B		503	-0.368624	-1.58936	0	0.0684225	1	3849	tags=30%, list=18%, signal=36%	NA
GOLDRATH_IMMUNE_MEMORY	GOLDRATH_IMMUNE_MEMORY		64	-0.468395	-1.58926	0.0232919	0.0683	1	3847	tags=36%, list=18%, signal=44%	NA
BENPORATH_NOS_TARGETS	BENPORATH_NOS_TARGETS		175	-0.405491	-1.58908	0.00274348	0.068219	1	2593	tags=24%, list=12%, signal=27%	NA
GRAESSMANN_APOPTOSIS_BY_SERUM_DEPRIVATION_UP	GRAESSMANN_APOPTOSIS_BY_SERUM_DEPRIVATION_UP		535	-0.365948	-1.58798	0	0.0686196	1	3224	tags=25%, list=15%, signal=28%	NA
JAZAERI_BREAST_CANCER_BRCA1_VS_BRCA2_DN	JAZAERI_BREAST_CANCER_BRCA1_VS_BRCA2_DN		42	-0.499841	-1.58779	0.031457	0.068559	1	3289	tags=31%, list=15%, signal=36%	NA
VALK_AML_WITH_CEBPA	VALK_AML_WITH_CEBPA		36	-0.527338	-1.5876	0.0229508	0.0685101	1	435	tags=14%, list=2%, signal=14%	NA
SUZUKI_RESPONSE_TO_TSA	SUZUKI_RESPONSE_TO_TSA		19	-0.592411	-1.58489	0.0478723	0.0697205	1	3321	tags=37%, list=15%, signal=43%	NA
BOYLAN_MULTIPLE_MYELOMA_C_DN	BOYLAN_MULTIPLE_MYELOMA_C_DN		55	-0.481774	-1.58413	0.0134933	0.0699587	1	2475	tags=31%, list=11%, signal=35%	NA
MONNIER_POSTRADIATION_TUMOR_ESCAPE_DN	MONNIER_POSTRADIATION_TUMOR_ESCAPE_DN		355	-0.377969	-1.58377	0.00118064	0.0700199	1	3443	tags=32%, list=16%, signal=37%	NA
LIU_SOX4_TARGETS_UP	LIU_SOX4_TARGETS_UP		131	-0.420122	-1.58321	0.00413223	0.0701465	1	2873	tags=33%, list=13%, signal=38%	NA
MOOTHA_TCA	MOOTHA_TCA		16	-0.607847	-1.58321	0.0349265	0.0699977	1	4805	tags=63%, list=22%, signal=80%	NA
HUANG_GATA2_TARGETS_UP	HUANG_GATA2_TARGETS_UP		144	-0.415372	-1.58212	0.00275862	0.0703397	1	2476	tags=33%, list=11%, signal=37%	NA
VALK_AML_CLUSTER_5	VALK_AML_CLUSTER_5		33	-0.5326	-1.58181	0.0275974	0.0703927	1	1317	tags=33%, list=6%, signal=35%	NA
MULLIGHAN_NPM1_SIGNATURE_3_UP	MULLIGHAN_NPM1_SIGNATURE_3_UP		326	-0.376837	-1.58117	0	0.0705709	1	3941	tags=35%, list=18%, signal=42%	NA
GROSS_HYPOXIA_VIA_ELK3_AND_HIF1A_UP	GROSS_HYPOXIA_VIA_ELK3_AND_HIF1A_UP		140	-0.416401	-1.57963	0.00415512	0.0712354	1	2368	tags=26%, list=11%, signal=29%	NA
PHONG_TNF_RESPONSE_VIA_P38_PARTIAL	PHONG_TNF_RESPONSE_VIA_P38_PARTIAL		159	-0.407712	-1.57524	0.00263505	0.0733732	1	2074	tags=26%, list=10%, signal=28%	NA
LEE_LIVER_CANCER_CIPROFIBRATE_DN	LEE_LIVER_CANCER_CIPROFIBRATE_DN		66	-0.462259	-1.57471	0.0306748	0.0735037	1	2187	tags=17%, list=10%, signal=18%	NA
KIM_RESPONSE_TO_TSA_AND_DECITABINE_UP	KIM_RESPONSE_TO_TSA_AND_DECITABINE_UP		126	-0.41363	-1.5744	0.00703235	0.0735053	1	1771	tags=14%, list=8%, signal=15%	NA
NELSON_RESPONSE_TO_ANDROGEN_UP	NELSON_RESPONSE_TO_ANDROGEN_UP		86	-0.44636	-1.57365	0.00759878	0.0737641	1	2459	tags=31%, list=11%, signal=35%	NA
BILD_SRC_ONCOGENIC_SIGNATURE	BILD_SRC_ONCOGENIC_SIGNATURE		60	-0.470013	-1.57351	0.0152905	0.0736968	1	3481	tags=42%, list=16%, signal=50%	NA
MARSON_FOXP3_TARGETS_UP	MARSON_FOXP3_TARGETS_UP		62	-0.469361	-1.57349	0.0247295	0.0735481	1	2839	tags=42%, list=13%, signal=48%	NA
BILANGES_RAPAMYCIN_SENSITIVE_GENES	BILANGES_RAPAMYCIN_SENSITIVE_GENES		39	-0.502226	-1.57347	0.0351759	0.0733979	1	3936	tags=33%, list=18%, signal=41%	NA
RAY_TARGETS_OF_P210_BCR_ABL_FUSION_UP	RAY_TARGETS_OF_P210_BCR_ABL_FUSION_UP		16	-0.619569	-1.57328	0.0304659	0.0733493	1	1723	tags=44%, list=8%, signal=47%	NA
REN_ALVEOLAR_RHABDOMYOSARCOMA_DN	REN_ALVEOLAR_RHABDOMYOSARCOMA_DN		403	-0.371067	-1.57278	0.00115741	0.0734787	1	2854	tags=28%, list=13%, signal=31%	NA
LEE_RECENT_THYMIC_EMIGRANT	LEE_RECENT_THYMIC_EMIGRANT		210	-0.388627	-1.57104	0.00389105	0.0743176	1	3377	tags=37%, list=16%, signal=44%	NA
WANG_TUMOR_INVASIVENESS_DN	WANG_TUMOR_INVASIVENESS_DN		206	-0.396216	-1.57081	0.00377358	0.0742956	1	3858	tags=35%, list=18%, signal=42%	NA
GAUSSMANN_MLL_AF4_FUSION_TARGETS_F_UP	GAUSSMANN_MLL_AF4_FUSION_TARGETS_F_UP		183	-0.40143	-1.57038	0.00554785	0.0743654	1	2204	tags=22%, list=10%, signal=25%	NA
ZHAN_V2_LATE_DIFFERENTIATION_GENES	ZHAN_V2_LATE_DIFFERENTIATION_GENES		42	-0.513049	-1.56976	0.0315091	0.0745103	1	902	tags=21%, list=4%, signal=22%	NA
KAN_RESPONSE_TO_ARSENIC_TRIOXIDE	KAN_RESPONSE_TO_ARSENIC_TRIOXIDE		120	-0.425567	-1.56965	0.0082531	0.0744144	1	1919	tags=23%, list=9%, signal=25%	NA
GARGALOVIC_RESPONSE_TO_OXIDIZED_PHOSPHOLIPIDS_TURQUOISE_UP	GARGALOVIC_RESPONSE_TO_OXIDIZED_PHOSPHOLIPIDS_TURQUOISE_UP		74	-0.453349	-1.56944	0.015015	0.0743752	1	2225	tags=36%, list=10%, signal=41%	NA
LANDIS_ERBB2_BREAST_TUMORS_324_DN	LANDIS_ERBB2_BREAST_TUMORS_324_DN		146	-0.405045	-1.5693	0.00808625	0.0743036	1	1724	tags=19%, list=8%, signal=21%	NA
JOHNSTONE_PARVB_TARGETS_2_UP	JOHNSTONE_PARVB_TARGETS_2_UP		133	-0.415884	-1.5672	0.00550964	0.0752464	1	2288	tags=20%, list=11%, signal=23%	NA
LU_EZH2_TARGETS_DN	LU_EZH2_TARGETS_DN		369	-0.373867	-1.5668	0.00115875	0.0753666	1	4254	tags=34%, list=20%, signal=41%	NA
MIYAGAWA_TARGETS_OF_EWSR1_ETS_FUSIONS_UP	MIYAGAWA_TARGETS_OF_EWSR1_ETS_FUSIONS_UP		248	-0.387818	-1.56542	0.00254453	0.0759191	1	2944	tags=26%, list=14%, signal=30%	NA
EBAUER_TARGETS_OF_PAX3_FOXO1_FUSION_UP	EBAUER_TARGETS_OF_PAX3_FOXO1_FUSION_UP		205	-0.392459	-1.56518	0.00381194	0.0759068	1	3001	tags=20%, list=14%, signal=24%	NA
HAHTOLA_CTCL_PATHOGENESIS	HAHTOLA_CTCL_PATHOGENESIS		16	-0.61514	-1.56392	0.0474308	0.0764585	1	356	tags=19%, list=2%, signal=19%	NA
DAVICIONI_TARGETS_OF_PAX_FOXO1_FUSIONS_DN	DAVICIONI_TARGETS_OF_PAX_FOXO1_FUSIONS_DN		67	-0.454099	-1.5639	0.0185185	0.076309	1	1187	tags=16%, list=5%, signal=17%	NA
CHYLA_CBFA2T3_TARGETS_UP	CHYLA_CBFA2T3_TARGETS_UP		377	-0.368086	-1.56381	0	0.0761941	1	2634	tags=24%, list=12%, signal=27%	NA
TARTE_PLASMA_CELL_VS_B_LYMPHOCYTE_UP	TARTE_PLASMA_CELL_VS_B_LYMPHOCYTE_UP		76	-0.449698	-1.56359	0.0133333	0.0761967	1	3035	tags=34%, list=14%, signal=40%	NA
HELLER_HDAC_TARGETS_SILENCED_BY_METHYLATION_DN	HELLER_HDAC_TARGETS_SILENCED_BY_METHYLATION_DN		273	-0.380365	-1.56255	0.001221	0.0766208	1	2828	tags=31%, list=13%, signal=35%	NA
JOHNSTONE_PARVB_TARGETS_1_DN	JOHNSTONE_PARVB_TARGETS_1_DN		59	-0.465643	-1.56251	0.0112179	0.0764765	1	3862	tags=47%, list=18%, signal=58%	NA
JIANG_HYPOXIA_NORMAL	JIANG_HYPOXIA_NORMAL		299	-0.379805	-1.56207	0.00249688	0.0766217	1	3591	tags=35%, list=17%, signal=41%	NA
HERNANDEZ_ABERRANT_MITOSIS_BY_DOCETACEL_2NM_UP	HERNANDEZ_ABERRANT_MITOSIS_BY_DOCETACEL_2NM_UP		78	-0.443835	-1.56187	0.0106222	0.0765939	1	2360	tags=23%, list=11%, signal=26%	NA
WEST_ADRENOCORTICAL_CARCINOMA_VS_ADENOMA_DN	WEST_ADRENOCORTICAL_CARCINOMA_VS_ADENOMA_DN		23	-0.565601	-1.56187	0.0377698	0.0764379	1	4283	tags=43%, list=20%, signal=54%	NA
POOLA_INVASIVE_BREAST_CANCER_UP	POOLA_INVASIVE_BREAST_CANCER_UP		276	-0.380115	-1.56077	0.00124533	0.076895	1	1805	tags=17%, list=8%, signal=19%	NA
WINZEN_DEGRADED_VIA_KHSRP	WINZEN_DEGRADED_VIA_KHSRP		98	-0.433752	-1.56047	0.0137615	0.0768933	1	2351	tags=22%, list=11%, signal=25%	NA
BAKKER_FOXO3_TARGETS_UP	BAKKER_FOXO3_TARGETS_UP		60	-0.459977	-1.56038	0.0263975	0.0767813	1	3234	tags=42%, list=15%, signal=49%	NA
VART_KSHV_INFECTION_ANGIOGENIC_MARKERS_DN	VART_KSHV_INFECTION_ANGIOGENIC_MARKERS_DN		137	-0.407235	-1.55944	0.0084507	0.0771987	1	1119	tags=12%, list=5%, signal=12%	NA
TOMLINS_METASTASIS_DN	TOMLINS_METASTASIS_DN		20	-0.578205	-1.55928	0.048474	0.0771053	1	4181	tags=55%, list=19%, signal=68%	NA
MARZEC_IL2_SIGNALING_DN	MARZEC_IL2_SIGNALING_DN		36	-0.519925	-1.5583	0.0275081	0.0775463	1	3041	tags=44%, list=14%, signal=52%	NA
FONTAINE_THYROID_TUMOR_UNCERTAIN_MALIGNANCY_DN	FONTAINE_THYROID_TUMOR_UNCERTAIN_MALIGNANCY_DN		26	-0.542177	-1.55816	0.0273723	0.0774507	1	348	tags=12%, list=2%, signal=12%	NA
MCCLUNG_COCAINE_REWARD_5D	MCCLUNG_COCAINE_REWARD_5D		79	-0.444601	-1.55814	0.0183206	0.077308	1	2822	tags=29%, list=13%, signal=33%	NA
PAL_PRMT5_TARGETS_DN	PAL_PRMT5_TARGETS_DN		29	-0.545043	-1.55694	0.040404	0.077849	1	2349	tags=28%, list=11%, signal=31%	NA
MARCHINI_TRABECTEDIN_RESISTANCE_UP	MARCHINI_TRABECTEDIN_RESISTANCE_UP		21	-0.56658	-1.55604	0.0505226	0.0782242	1	382	tags=19%, list=2%, signal=19%	NA
SAGIV_CD24_TARGETS_UP	SAGIV_CD24_TARGETS_UP		21	-0.565905	-1.55577	0.0454545	0.0782105	1	3776	tags=52%, list=17%, signal=63%	NA
PEDERSEN_METASTASIS_BY_ERBB2_ISOFORM_1	PEDERSEN_METASTASIS_BY_ERBB2_ISOFORM_1		46	-0.492372	-1.55455	0.0263566	0.0787743	1	2762	tags=28%, list=13%, signal=32%	NA
PENG_GLUCOSE_DEPRIVATION_DN	PENG_GLUCOSE_DEPRIVATION_DN		165	-0.398038	-1.55218	0.00803213	0.0799709	1	3239	tags=30%, list=15%, signal=35%	NA
HSIAO_LIVER_SPECIFIC_GENES	HSIAO_LIVER_SPECIFIC_GENES		242	-0.382651	-1.55206	0.0037037	0.0798716	1	1724	tags=13%, list=8%, signal=14%	NA
BROWNE_HCMV_INFECTION_8HR_UP	BROWNE_HCMV_INFECTION_8HR_UP		102	-0.428927	-1.55132	0.00718391	0.0801132	1	3053	tags=31%, list=14%, signal=36%	NA
KYNG_WERNER_SYNDROM_DN	KYNG_WERNER_SYNDROM_DN		27	-0.545351	-1.55054	0.0465116	0.0804247	1	2843	tags=48%, list=13%, signal=55%	NA
RIGGI_EWING_SARCOMA_PROGENITOR_UP	RIGGI_EWING_SARCOMA_PROGENITOR_UP		409	-0.364242	-1.55048	0	0.0802948	1	2652	tags=19%, list=12%, signal=21%	NA
MCBRYAN_PUBERTAL_TGFB1_TARGETS_UP	MCBRYAN_PUBERTAL_TGFB1_TARGETS_UP		169	-0.394555	-1.55023	0.00398406	0.0802826	1	2614	tags=25%, list=12%, signal=29%	NA
GRANDVAUX_IRF3_TARGETS_DN	GRANDVAUX_IRF3_TARGETS_DN		19	-0.587075	-1.5484	0.0621572	0.0811873	1	2860	tags=37%, list=13%, signal=42%	NA
TSAI_RESPONSE_TO_IONIZING_RADIATION	TSAI_RESPONSE_TO_IONIZING_RADIATION		149	-0.397432	-1.54614	0.00555556	0.0824215	1	2758	tags=28%, list=13%, signal=32%	NA
GESERICK_TERT_TARGETS_DN	GESERICK_TERT_TARGETS_DN		21	-0.585386	-1.5453	0.0463576	0.0827766	1	1760	tags=29%, list=8%, signal=31%	NA
KIM_WT1_TARGETS_UP	KIM_WT1_TARGETS_UP		211	-0.385806	-1.5448	0.00253165	0.0829201	1	2844	tags=23%, list=13%, signal=26%	NA
BERENJENO_ROCK_SIGNALING_NOT_VIA_RHOA_DN	BERENJENO_ROCK_SIGNALING_NOT_VIA_RHOA_DN		45	-0.486379	-1.54222	0.0275081	0.0842086	1	3591	tags=42%, list=17%, signal=51%	NA
SHEDDEN_LUNG_CANCER_GOOD_SURVIVAL_A12	SHEDDEN_LUNG_CANCER_GOOD_SURVIVAL_A12		290	-0.372609	-1.54214	0.00120627	0.0840729	1	2349	tags=16%, list=11%, signal=18%	NA
SUNG_METASTASIS_STROMA_UP	SUNG_METASTASIS_STROMA_UP		108	-0.423986	-1.54158	0.00720461	0.0842515	1	2137	tags=19%, list=10%, signal=21%	NA
ONO_FOXP3_TARGETS_UP	ONO_FOXP3_TARGETS_UP		23	-0.551155	-1.54128	0.0596745	0.0842596	1	242	tags=13%, list=1%, signal=13%	NA
VARELA_ZMPSTE24_TARGETS_DN	VARELA_ZMPSTE24_TARGETS_DN		38	-0.49674	-1.54107	0.0284757	0.0841961	1	1826	tags=18%, list=8%, signal=20%	NA
ZWANG_CLASS_2_TRANSIENTLY_INDUCED_BY_EGF	ZWANG_CLASS_2_TRANSIENTLY_INDUCED_BY_EGF		48	-0.481568	-1.54072	0.0396196	0.0842286	1	3507	tags=27%, list=16%, signal=32%	NA
CHOW_RASSF1_TARGETS_UP	CHOW_RASSF1_TARGETS_UP		27	-0.535304	-1.5385	0.0533808	0.0854141	1	2582	tags=37%, list=12%, signal=42%	NA
HADDAD_B_LYMPHOCYTE_PROGENITOR	HADDAD_B_LYMPHOCYTE_PROGENITOR		279	-0.377631	-1.53809	0	0.0855492	1	3113	tags=29%, list=14%, signal=33%	NA
GAVIN_FOXP3_TARGETS_CLUSTER_P3	GAVIN_FOXP3_TARGETS_CLUSTER_P3		156	-0.398304	-1.53781	0.00702247	0.0855671	1	3262	tags=29%, list=15%, signal=34%	NA
VALK_AML_CLUSTER_4	VALK_AML_CLUSTER_4		26	-0.535263	-1.5376	0.0552677	0.0855259	1	435	tags=23%, list=2%, signal=24%	NA
KIM_WT1_TARGETS_12HR_UP	KIM_WT1_TARGETS_12HR_UP		157	-0.399585	-1.53641	0.0120643	0.0861185	1	642	tags=11%, list=3%, signal=12%	NA
WANG_RESPONSE_TO_BEXAROTENE_DN	WANG_RESPONSE_TO_BEXAROTENE_DN		29	-0.537907	-1.5364	0.0416667	0.0859584	1	4401	tags=48%, list=20%, signal=61%	NA
GAURNIER_PSMD4_TARGETS	GAURNIER_PSMD4_TARGETS		69	-0.441236	-1.53602	0.0154321	0.085993	1	2478	tags=23%, list=11%, signal=26%	NA
LIU_VAV3_PROSTATE_CARCINOGENESIS_DN	LIU_VAV3_PROSTATE_CARCINOGENESIS_DN		17	-0.604424	-1.53539	0.0453686	0.0861899	1	1464	tags=29%, list=7%, signal=32%	NA
KORKOLA_YOLK_SAC_TUMOR	KORKOLA_YOLK_SAC_TUMOR		59	-0.459242	-1.53465	0.0364742	0.0864858	1	1380	tags=15%, list=6%, signal=16%	NA
BRACHAT_RESPONSE_TO_CAMPTOTHECIN_UP	BRACHAT_RESPONSE_TO_CAMPTOTHECIN_UP		27	-0.528948	-1.53411	0.0493197	0.0866534	1	1325	tags=33%, list=6%, signal=35%	NA
NATSUME_RESPONSE_TO_INTERFERON_BETA_UP	NATSUME_RESPONSE_TO_INTERFERON_BETA_UP		71	-0.442564	-1.53346	0.0180451	0.0869392	1	4363	tags=46%, list=20%, signal=58%	NA
HOWLIN_CITED1_TARGETS_2_UP	HOWLIN_CITED1_TARGETS_2_UP		16	-0.601802	-1.53319	0.0527307	0.0869578	1	1983	tags=38%, list=9%, signal=41%	NA
KIM_WT1_TARGETS_12HR_DN	KIM_WT1_TARGETS_12HR_DN		203	-0.384923	-1.5329	0.00385604	0.0869728	1	2972	tags=28%, list=14%, signal=32%	NA
GENTILE_UV_RESPONSE_CLUSTER_D4	GENTILE_UV_RESPONSE_CLUSTER_D4		54	-0.46353	-1.53266	0.0243112	0.0869392	1	4431	tags=50%, list=20%, signal=63%	NA
SARTIPY_NORMAL_AT_INSULIN_RESISTANCE_UP	SARTIPY_NORMAL_AT_INSULIN_RESISTANCE_UP		34	-0.516629	-1.53195	0.0333333	0.0872552	1	1760	tags=29%, list=8%, signal=32%	NA
GUO_TARGETS_OF_IRS1_AND_IRS2	GUO_TARGETS_OF_IRS1_AND_IRS2		94	-0.42822	-1.53067	0.0139104	0.0878495	1	2397	tags=29%, list=11%, signal=32%	NA
TORCHIA_TARGETS_OF_EWSR1_FLI1_FUSION_TOP20_DN	TORCHIA_TARGETS_OF_EWSR1_FLI1_FUSION_TOP20_DN		18	-0.56382	-1.52937	0.0661765	0.0885554	1	2137	tags=39%, list=10%, signal=43%	NA
LENAOUR_DENDRITIC_CELL_MATURATION_DN	LENAOUR_DENDRITIC_CELL_MATURATION_DN		128	-0.409983	-1.52928	0.0153417	0.0884444	1	1118	tags=20%, list=5%, signal=21%	NA
MULLIGHAN_MLL_SIGNATURE_2_DN	MULLIGHAN_MLL_SIGNATURE_2_DN		272	-0.372335	-1.52905	0.00243902	0.0884234	1	2691	tags=24%, list=12%, signal=27%	NA
HAHTOLA_MYCOSIS_FUNGOIDES_UP	HAHTOLA_MYCOSIS_FUNGOIDES_UP		18	-0.594506	-1.52889	0.0440917	0.0883571	1	2163	tags=39%, list=10%, signal=43%	NA
KANG_IMMORTALIZED_BY_TERT_DN	KANG_IMMORTALIZED_BY_TERT_DN		101	-0.417359	-1.52876	0.0185185	0.0882546	1	676	tags=9%, list=3%, signal=9%	NA
MAHAJAN_RESPONSE_TO_IL1A_UP	MAHAJAN_RESPONSE_TO_IL1A_UP		80	-0.437958	-1.52847	0.0272315	0.0882917	1	2624	tags=20%, list=12%, signal=23%	NA
PETROVA_ENDOTHELIUM_LYMPHATIC_VS_BLOOD_UP	PETROVA_ENDOTHELIUM_LYMPHATIC_VS_BLOOD_UP		130	-0.402681	-1.52842	0.0041958	0.0881534	1	2835	tags=24%, list=13%, signal=27%	NA
AMIT_EGF_RESPONSE_40_HELA	AMIT_EGF_RESPONSE_40_HELA		42	-0.480763	-1.52761	0.0425532	0.0884672	1	3025	tags=36%, list=14%, signal=41%	NA
LEE_LIVER_CANCER_CIPROFIBRATE_UP	LEE_LIVER_CANCER_CIPROFIBRATE_UP		58	-0.454461	-1.52699	0.0286624	0.0887121	1	2547	tags=24%, list=12%, signal=27%	NA
FORTSCHEGGER_PHF8_TARGETS_UP	FORTSCHEGGER_PHF8_TARGETS_UP		261	-0.371328	-1.5265	0.00383632	0.0888746	1	2475	tags=24%, list=11%, signal=26%	NA
TARTE_PLASMA_CELL_VS_B_LYMPHOCYTE_DN	TARTE_PLASMA_CELL_VS_B_LYMPHOCYTE_DN		38	-0.49379	-1.52526	0.0434783	0.0894637	1	2559	tags=42%, list=12%, signal=48%	NA
BAUS_TFF2_TARGETS_UP	BAUS_TFF2_TARGETS_UP		30	-0.509826	-1.52236	0.0420875	0.0910602	1	1074	tags=17%, list=5%, signal=18%	NA
BROWNE_HCMV_INFECTION_10HR_DN	BROWNE_HCMV_INFECTION_10HR_DN		54	-0.467616	-1.52148	0.0272873	0.0913894	1	3060	tags=43%, list=14%, signal=49%	NA
KUNINGER_IGF1_VS_PDGFB_TARGETS_DN	KUNINGER_IGF1_VS_PDGFB_TARGETS_DN		45	-0.475563	-1.51877	0.0358306	0.0929424	1	1749	tags=16%, list=8%, signal=17%	NA
BROWNE_HCMV_INFECTION_6HR_UP	BROWNE_HCMV_INFECTION_6HR_UP		68	-0.440309	-1.51849	0.0384025	0.0929292	1	437	tags=9%, list=2%, signal=9%	NA
HOSHIDA_LIVER_CANCER_SURVIVAL_UP	HOSHIDA_LIVER_CANCER_SURVIVAL_UP		73	-0.430285	-1.51824	0.0164425	0.0929348	1	1947	tags=23%, list=9%, signal=26%	NA
MILI_PSEUDOPODIA	MILI_PSEUDOPODIA		43	-0.487881	-1.51728	0.0512821	0.0933515	1	3577	tags=44%, list=17%, signal=53%	NA
JOSEPH_RESPONSE_TO_SODIUM_BUTYRATE_UP	JOSEPH_RESPONSE_TO_SODIUM_BUTYRATE_UP		31	-0.509801	-1.51621	0.0609555	0.0938972	1	3547	tags=35%, list=16%, signal=42%	NA
MUELLER_COMMON_TARGETS_OF_AML_FUSIONS_DN	MUELLER_COMMON_TARGETS_OF_AML_FUSIONS_DN		30	-0.516625	-1.51587	0.0550162	0.0939456	1	1491	tags=23%, list=7%, signal=25%	NA
LEE_CALORIE_RESTRICTION_MUSCLE_UP	LEE_CALORIE_RESTRICTION_MUSCLE_UP		41	-0.485463	-1.51476	0.0273504	0.0944693	1	2454	tags=20%, list=11%, signal=22%	NA
ONDER_CDH1_TARGETS_2_DN	ONDER_CDH1_TARGETS_2_DN		454	-0.356169	-1.51452	0	0.0944441	1	1703	tags=13%, list=8%, signal=14%	NA
VISALA_RESPONSE_TO_HEAT_SHOCK_AND_AGING_UP	VISALA_RESPONSE_TO_HEAT_SHOCK_AND_AGING_UP		15	-0.601918	-1.51449	0.0657194	0.0942947	1	1061	tags=27%, list=5%, signal=28%	NA
SAGIV_CD24_TARGETS_DN	SAGIV_CD24_TARGETS_DN		45	-0.478055	-1.51177	0.0327869	0.0958629	1	1042	tags=22%, list=5%, signal=23%	NA
MASSARWEH_RESPONSE_TO_ESTRADIOL	MASSARWEH_RESPONSE_TO_ESTRADIOL		59	-0.444796	-1.51082	0.0354938	0.0963323	1	2512	tags=29%, list=12%, signal=33%	NA
TONKS_TARGETS_OF_RUNX1_RUNX1T1_FUSION_HSC_UP	TONKS_TARGETS_OF_RUNX1_RUNX1T1_FUSION_HSC_UP		182	-0.381205	-1.5107	0.00540541	0.0962395	1	2261	tags=24%, list=10%, signal=26%	NA
WAKABAYASHI_ADIPOGENESIS_PPARG_RXRA_BOUND_WITH_H4K20ME1_MARK	WAKABAYASHI_ADIPOGENESIS_PPARG_RXRA_BOUND_WITH_H4K20ME1_MARK		138	-0.395974	-1.51002	0.0161725	0.0964779	1	3544	tags=34%, list=16%, signal=40%	NA
SU_THYMUS	SU_THYMUS		20	-0.56018	-1.50977	0.0480427	0.0964654	1	2042	tags=35%, list=9%, signal=39%	NA
MULLIGHAN_NPM1_MUTATED_SIGNATURE_1_UP	MULLIGHAN_NPM1_MUTATED_SIGNATURE_1_UP		262	-0.366892	-1.50967	0.00373599	0.0963543	1	3255	tags=29%, list=15%, signal=34%	NA
WU_HBX_TARGETS_3_UP	WU_HBX_TARGETS_3_UP		18	-0.580449	-1.50826	0.0675676	0.0970062	1	3365	tags=39%, list=16%, signal=46%	NA
SWEET_KRAS_ONCOGENIC_SIGNATURE	SWEET_KRAS_ONCOGENIC_SIGNATURE		89	-0.42175	-1.50583	0.0361272	0.0985076	1	2074	tags=24%, list=10%, signal=26%	NA
MISSIAGLIA_REGULATED_BY_METHYLATION_UP	MISSIAGLIA_REGULATED_BY_METHYLATION_UP		124	-0.400168	-1.50534	0.0165746	0.0986718	1	3378	tags=31%, list=16%, signal=37%	NA
RAY_TUMORIGENESIS_BY_ERBB2_CDC25A_UP	RAY_TUMORIGENESIS_BY_ERBB2_CDC25A_UP		101	-0.416854	-1.50446	0.0149701	0.0990489	1	2403	tags=19%, list=11%, signal=21%	NA
MCCABE_HOXC6_TARGETS_DN	MCCABE_HOXC6_TARGETS_DN		21	-0.552926	-1.5044	0.0593368	0.0989253	1	273	tags=14%, list=1%, signal=14%	NA
BLALOCK_ALZHEIMERS_DISEASE_INCIPIENT_UP	BLALOCK_ALZHEIMERS_DISEASE_INCIPIENT_UP		383	-0.355637	-1.50359	0	0.0993374	1	2860	tags=25%, list=13%, signal=28%	NA
SARTIPY_NORMAL_AT_INSULIN_RESISTANCE_DN	SARTIPY_NORMAL_AT_INSULIN_RESISTANCE_DN		20	-0.550073	-1.50295	0.070568	0.0996039	1	2414	tags=30%, list=11%, signal=34%	NA
FARMER_BREAST_CANCER_APOCRINE_VS_BASAL	FARMER_BREAST_CANCER_APOCRINE_VS_BASAL		323	-0.356613	-1.50156	0	0.100414	1	3434	tags=28%, list=16%, signal=33%	NA
IVANOVA_HEMATOPOIESIS_LATE_PROGENITOR	IVANOVA_HEMATOPOIESIS_LATE_PROGENITOR		520	-0.347447	-1.5014	0	0.100336	1	2989	tags=26%, list=14%, signal=29%	NA
LEI_MYB_TARGETS	LEI_MYB_TARGETS		316	-0.362093	-1.50133	0.00246305	0.100211	1	1336	tags=16%, list=6%, signal=16%	NA
MULLIGHAN_MLL_SIGNATURE_2_UP	MULLIGHAN_MLL_SIGNATURE_2_UP		398	-0.35304	-1.50108	0.00116686	0.100236	1	3441	tags=33%, list=16%, signal=38%	NA
DAZARD_RESPONSE_TO_UV_SCC_DN	DAZARD_RESPONSE_TO_UV_SCC_DN		120	-0.400489	-1.49962	0.00846262	0.101088	1	3233	tags=34%, list=15%, signal=40%	NA
RODWELL_AGING_KIDNEY_DN	RODWELL_AGING_KIDNEY_DN		136	-0.398286	-1.49788	0.0128205	0.10209	1	3837	tags=30%, list=18%, signal=36%	NA
PHONG_TNF_TARGETS_UP	PHONG_TNF_TARGETS_UP		63	-0.438519	-1.49725	0.034375	0.102342	1	1119	tags=21%, list=5%, signal=22%	NA
DACOSTA_UV_RESPONSE_VIA_ERCC3_TTD_DN	DACOSTA_UV_RESPONSE_VIA_ERCC3_TTD_DN		82	-0.427455	-1.49626	0.0296296	0.102884	1	3871	tags=40%, list=18%, signal=49%	NA
NOUZOVA_METHYLATED_IN_APL	NOUZOVA_METHYLATED_IN_APL		60	-0.45436	-1.49586	0.0380349	0.102998	1	2572	tags=18%, list=12%, signal=21%	NA
MARIADASON_RESPONSE_TO_BUTYRATE_CURCUMIN_SULINDAC_TSA_8	MARIADASON_RESPONSE_TO_BUTYRATE_CURCUMIN_SULINDAC_TSA_8		15	-0.584841	-1.49564	0.0884477	0.102959	1	2896	tags=47%, list=13%, signal=54%	NA
CROONQUIST_NRAS_VS_STROMAL_STIMULATION_UP	CROONQUIST_NRAS_VS_STROMAL_STIMULATION_UP		41	-0.493362	-1.49562	0.0422297	0.102788	1	1089	tags=24%, list=5%, signal=26%	NA
ENK_UV_RESPONSE_EPIDERMIS_DN	ENK_UV_RESPONSE_EPIDERMIS_DN		498	-0.349787	-1.49527	0	0.102866	1	2576	tags=24%, list=12%, signal=27%	NA
WONG_ADULT_TISSUE_STEM_MODULE	WONG_ADULT_TISSUE_STEM_MODULE		705	-0.339576	-1.49512	0	0.102765	1	2551	tags=19%, list=12%, signal=21%	NA
GERY_CEBP_TARGETS	GERY_CEBP_TARGETS		125	-0.396851	-1.49453	0.0155367	0.10299	1	2395	tags=22%, list=11%, signal=25%	NA
STEIN_ESRRA_TARGETS_RESPONSIVE_TO_ESTROGEN_UP	STEIN_ESRRA_TARGETS_RESPONSIVE_TO_ESTROGEN_UP		31	-0.495961	-1.49421	0.0572831	0.103046	1	2755	tags=35%, list=13%, signal=41%	NA
ROSS_LEUKEMIA_WITH_MLL_FUSIONS	ROSS_LEUKEMIA_WITH_MLL_FUSIONS		76	-0.429521	-1.49304	0.0356612	0.103806	1	1699	tags=25%, list=8%, signal=27%	NA
LEE_NEURAL_CREST_STEM_CELL_UP	LEE_NEURAL_CREST_STEM_CELL_UP		143	-0.386411	-1.49287	0.00549451	0.103756	1	887	tags=11%, list=4%, signal=12%	NA
HELLER_SILENCED_BY_METHYLATION_UP	HELLER_SILENCED_BY_METHYLATION_UP		275	-0.363997	-1.49281	0.00380711	0.103609	1	1753	tags=16%, list=8%, signal=17%	NA
SMID_BREAST_CANCER_LUMINAL_B_DN	SMID_BREAST_CANCER_LUMINAL_B_DN		545	-0.343211	-1.49148	0	0.104331	1	1185	tags=10%, list=5%, signal=11%	NA
NAKAYAMA_FRA2_TARGETS	NAKAYAMA_FRA2_TARGETS		41	-0.470615	-1.49075	0.0416	0.104649	1	2019	tags=32%, list=9%, signal=35%	NA
HUANG_DASATINIB_RESISTANCE_UP	HUANG_DASATINIB_RESISTANCE_UP		80	-0.430278	-1.49002	0.0290965	0.10502	1	3049	tags=34%, list=14%, signal=39%	NA
SCHLINGEMANN_SKIN_CARCINOGENESIS_TPA_DN	SCHLINGEMANN_SKIN_CARCINOGENESIS_TPA_DN		27	-0.510542	-1.48783	0.0428082	0.106407	1	2653	tags=26%, list=12%, signal=30%	NA
VANHARANTA_UTERINE_FIBROID_DN	VANHARANTA_UTERINE_FIBROID_DN		64	-0.434354	-1.48744	0.0392749	0.106477	1	2074	tags=25%, list=10%, signal=28%	NA
MORI_EMU_MYC_LYMPHOMA_BY_ONSET_TIME_DN	MORI_EMU_MYC_LYMPHOMA_BY_ONSET_TIME_DN		17	-0.5649	-1.48699	0.0776515	0.106609	1	1953	tags=47%, list=9%, signal=52%	NA
TIEN_INTESTINE_PROBIOTICS_2HR_DN	TIEN_INTESTINE_PROBIOTICS_2HR_DN		87	-0.413036	-1.48665	0.0147275	0.106702	1	2132	tags=28%, list=10%, signal=30%	NA
ZHANG_GATA6_TARGETS_UP	ZHANG_GATA6_TARGETS_UP		15	-0.595827	-1.48661	0.0770578	0.10656	1	2324	tags=33%, list=11%, signal=37%	NA
FLECHNER_BIOPSY_KIDNEY_TRANSPLANT_REJECTED_VS_OK_UP	FLECHNER_BIOPSY_KIDNEY_TRANSPLANT_REJECTED_VS_OK_UP		86	-0.413624	-1.48653	0.0256024	0.106425	1	1459	tags=24%, list=7%, signal=26%	NA
FIRESTEIN_PROLIFERATION	FIRESTEIN_PROLIFERATION		170	-0.381562	-1.48517	0.0110957	0.107154	1	2585	tags=21%, list=12%, signal=24%	NA
FARMER_BREAST_CANCER_APOCRINE_VS_LUMINAL	FARMER_BREAST_CANCER_APOCRINE_VS_LUMINAL		315	-0.360412	-1.48509	0.00118203	0.10702	1	2872	tags=25%, list=13%, signal=28%	NA
KONDO_COLON_CANCER_HCP_WITH_H3K27ME1	KONDO_COLON_CANCER_HCP_WITH_H3K27ME1		24	-0.525712	-1.48481	0.0604396	0.107049	1	4039	tags=50%, list=19%, signal=61%	NA
COLIN_PILOCYTIC_ASTROCYTOMA_VS_GLIOBLASTOMA_DN	COLIN_PILOCYTIC_ASTROCYTOMA_VS_GLIOBLASTOMA_DN		28	-0.512613	-1.48442	0.0577617	0.107125	1	1991	tags=36%, list=9%, signal=39%	NA
LI_ADIPOGENESIS_BY_ACTIVATED_PPARG	LI_ADIPOGENESIS_BY_ACTIVATED_PPARG		17	-0.566198	-1.48384	0.0606618	0.107356	1	3245	tags=35%, list=15%, signal=41%	NA
MMS_MOUSE_LYMPH_HIGH_4HRS_UP	MMS_MOUSE_LYMPH_HIGH_4HRS_UP		33	-0.499031	-1.48334	0.0469012	0.107532	1	3434	tags=55%, list=16%, signal=65%	NA
NIELSEN_GIST_AND_SYNOVIAL_SARCOMA_DN	NIELSEN_GIST_AND_SYNOVIAL_SARCOMA_DN		19	-0.549226	-1.48159	0.0833333	0.1086	1	1459	tags=37%, list=7%, signal=39%	NA
PYEON_HPV_POSITIVE_TUMORS_UP	PYEON_HPV_POSITIVE_TUMORS_UP		89	-0.415001	-1.48159	0.029703	0.108421	1	4433	tags=44%, list=20%, signal=55%	NA
HARRIS_BRAIN_CANCER_PROGENITORS	HARRIS_BRAIN_CANCER_PROGENITORS		42	-0.474201	-1.48117	0.0597015	0.108493	1	341	tags=7%, list=2%, signal=7%	NA
OKUMURA_INFLAMMATORY_RESPONSE_LPS	OKUMURA_INFLAMMATORY_RESPONSE_LPS		177	-0.37417	-1.48089	0.00943396	0.108502	1	2483	tags=24%, list=11%, signal=27%	NA
ZHENG_FOXP3_TARGETS_UP	ZHENG_FOXP3_TARGETS_UP		26	-0.519609	-1.48052	0.0596026	0.108569	1	2120	tags=35%, list=10%, signal=38%	NA
BOYAULT_LIVER_CANCER_SUBCLASS_G56_DN	BOYAULT_LIVER_CANCER_SUBCLASS_G56_DN		17	-0.577189	-1.48004	0.0514286	0.108739	1	1925	tags=35%, list=9%, signal=39%	NA
KONDO_EZH2_TARGETS	KONDO_EZH2_TARGETS		224	-0.365455	-1.47924	0.00771208	0.109156	1	2844	tags=21%, list=13%, signal=23%	NA
NOUZOVA_TRETINOIN_AND_H4_ACETYLATION	NOUZOVA_TRETINOIN_AND_H4_ACETYLATION		134	-0.391029	-1.47923	0.00943396	0.108981	1	4684	tags=44%, list=22%, signal=56%	NA
LEE_AGING_NEOCORTEX_UP	LEE_AGING_NEOCORTEX_UP		88	-0.416444	-1.4792	0.0298507	0.10883	1	2617	tags=31%, list=12%, signal=35%	NA
IWANAGA_E2F1_TARGETS_INDUCED_BY_SERUM	IWANAGA_E2F1_TARGETS_INDUCED_BY_SERUM		30	-0.495943	-1.47873	0.0572391	0.109021	1	4606	tags=47%, list=21%, signal=59%	NA
SCHRAETS_MLL_TARGETS_UP	SCHRAETS_MLL_TARGETS_UP		35	-0.498141	-1.47824	0.0576	0.109197	1	3533	tags=31%, list=16%, signal=37%	NA
KENNY_CTNNB1_TARGETS_DN	KENNY_CTNNB1_TARGETS_DN		52	-0.449238	-1.47687	0.0507365	0.109987	1	2911	tags=37%, list=13%, signal=42%	NA
GHANDHI_BYSTANDER_IRRADIATION_UP	GHANDHI_BYSTANDER_IRRADIATION_UP		82	-0.414561	-1.47679	0.0355487	0.109866	1	1982	tags=24%, list=9%, signal=27%	NA
RHEIN_ALL_GLUCOCORTICOID_THERAPY_UP	RHEIN_ALL_GLUCOCORTICOID_THERAPY_UP		76	-0.4255	-1.47675	0.0342772	0.109718	1	1250	tags=21%, list=6%, signal=22%	NA
LINDSTEDT_DENDRITIC_CELL_MATURATION_D	LINDSTEDT_DENDRITIC_CELL_MATURATION_D		66	-0.435411	-1.47659	0.028481	0.109649	1	1951	tags=29%, list=9%, signal=32%	NA
DAVICIONI_PAX_FOXO1_SIGNATURE_IN_ARMS_DN	DAVICIONI_PAX_FOXO1_SIGNATURE_IN_ARMS_DN		20	-0.548134	-1.47657	0.0731261	0.109484	1	1118	tags=25%, list=5%, signal=26%	NA
OUELLET_OVARIAN_CANCER_INVASIVE_VS_LMP_UP	OUELLET_OVARIAN_CANCER_INVASIVE_VS_LMP_UP		117	-0.395199	-1.47626	0.0266106	0.109575	1	4091	tags=33%, list=19%, signal=41%	NA
UEDA_PERIFERAL_CLOCK	UEDA_PERIFERAL_CLOCK		166	-0.381776	-1.47572	0.0218281	0.109765	1	4183	tags=35%, list=19%, signal=43%	NA
WOO_LIVER_CANCER_RECURRENCE_DN	WOO_LIVER_CANCER_RECURRENCE_DN		79	-0.417671	-1.47435	0.0425844	0.110601	1	1691	tags=16%, list=8%, signal=18%	NA
COULOUARN_TEMPORAL_TGFB1_SIGNATURE_UP	COULOUARN_TEMPORAL_TGFB1_SIGNATURE_UP		108	-0.400677	-1.47431	0.0242511	0.110463	1	3440	tags=34%, list=16%, signal=41%	NA
ZHU_SKIL_TARGETS_UP	ZHU_SKIL_TARGETS_UP		20	-0.547405	-1.47261	0.0712946	0.111537	1	1189	tags=25%, list=5%, signal=26%	NA
MARIADASON_REGULATED_BY_HISTONE_ACETYLATION_UP	MARIADASON_REGULATED_BY_HISTONE_ACETYLATION_UP		77	-0.421919	-1.47057	0.0311042	0.112726	1	4506	tags=39%, list=21%, signal=49%	NA
BRUECKNER_TARGETS_OF_MIRLET7A3_UP	BRUECKNER_TARGETS_OF_MIRLET7A3_UP		105	-0.397	-1.47026	0.0160116	0.112768	1	3170	tags=33%, list=15%, signal=39%	NA
LEE_LIVER_CANCER_E2F1_DN	LEE_LIVER_CANCER_E2F1_DN		62	-0.438007	-1.4693	0.0422961	0.11337	1	1675	tags=18%, list=8%, signal=19%	NA
RASHI_NFKB1_TARGETS	RASHI_NFKB1_TARGETS		19	-0.5552	-1.46913	0.0740072	0.113305	1	262	tags=21%, list=1%, signal=21%	NA
WATANABE_RECTAL_CANCER_RADIOTHERAPY_RESPONSIVE_UP	WATANABE_RECTAL_CANCER_RADIOTHERAPY_RESPONSIVE_UP		105	-0.399378	-1.46736	0.0204082	0.114432	1	4167	tags=36%, list=19%, signal=45%	NA
ACEVEDO_FGFR1_TARGETS_IN_PROSTATE_CANCER_MODEL_UP	ACEVEDO_FGFR1_TARGETS_IN_PROSTATE_CANCER_MODEL_UP		279	-0.359348	-1.46709	0.00499376	0.114453	1	2508	tags=19%, list=12%, signal=21%	NA
WEST_ADRENOCORTICAL_TUMOR_MARKERS_UP	WEST_ADRENOCORTICAL_TUMOR_MARKERS_UP		21	-0.535272	-1.46594	0.0647482	0.115148	1	3326	tags=43%, list=15%, signal=51%	NA
NUTT_GBM_VS_AO_GLIOMA_UP	NUTT_GBM_VS_AO_GLIOMA_UP		46	-0.456169	-1.46558	0.041806	0.115215	1	1319	tags=24%, list=6%, signal=25%	NA
GRUETZMANN_PANCREATIC_CANCER_UP	GRUETZMANN_PANCREATIC_CANCER_UP		353	-0.351285	-1.46499	0.00240385	0.115462	1	3158	tags=26%, list=15%, signal=30%	NA
MOHANKUMAR_TLX1_TARGETS_DN	MOHANKUMAR_TLX1_TARGETS_DN		174	-0.373754	-1.46481	0.0186916	0.115408	1	2537	tags=17%, list=12%, signal=19%	NA
WANG_MLL_TARGETS	WANG_MLL_TARGETS		282	-0.357364	-1.46362	0.00630517	0.116032	1	1062	tags=10%, list=5%, signal=10%	NA
RICKMAN_METASTASIS_UP	RICKMAN_METASTASIS_UP		327	-0.35045	-1.46204	0.00479616	0.117029	1	3236	tags=28%, list=15%, signal=32%	NA
KAYO_AGING_MUSCLE_DN	KAYO_AGING_MUSCLE_DN		123	-0.389731	-1.46169	0.0238095	0.117115	1	2735	tags=25%, list=13%, signal=29%	NA
HELLER_SILENCED_BY_METHYLATION_DN	HELLER_SILENCED_BY_METHYLATION_DN		103	-0.397735	-1.46167	0.023845	0.116957	1	2072	tags=25%, list=10%, signal=28%	NA
RAO_BOUND_BY_SALL4_ISOFORM_A	RAO_BOUND_BY_SALL4_ISOFORM_A		174	-0.371597	-1.46019	0.0145503	0.117921	1	2697	tags=19%, list=12%, signal=21%	NA
BASSO_CD40_SIGNALING_UP	BASSO_CD40_SIGNALING_UP		100	-0.400584	-1.45956	0.0235294	0.118221	1	1741	tags=29%, list=8%, signal=31%	NA
HINATA_NFKB_TARGETS_FIBROBLAST_UP	HINATA_NFKB_TARGETS_FIBROBLAST_UP		84	-0.407955	-1.45887	0.0308824	0.118606	1	966	tags=18%, list=4%, signal=19%	NA
CHEN_LVAD_SUPPORT_OF_FAILING_HEART_UP	CHEN_LVAD_SUPPORT_OF_FAILING_HEART_UP		101	-0.399899	-1.45863	0.0275482	0.118595	1	2121	tags=25%, list=10%, signal=27%	NA
MAYBURD_RESPONSE_TO_L663536_DN	MAYBURD_RESPONSE_TO_L663536_DN		53	-0.445035	-1.45853	0.0422078	0.118476	1	4407	tags=51%, list=20%, signal=64%	NA
DELACROIX_RAR_BOUND_ES	DELACROIX_RAR_BOUND_ES		440	-0.340631	-1.45833	0.00114025	0.118473	1	3619	tags=25%, list=17%, signal=29%	NA
BURTON_ADIPOGENESIS_PEAK_AT_2HR	BURTON_ADIPOGENESIS_PEAK_AT_2HR		50	-0.452353	-1.45825	0.0480132	0.11836	1	1268	tags=20%, list=6%, signal=21%	NA
CHARAFE_BREAST_CANCER_LUMINAL_VS_MESENCHYMAL_DN	CHARAFE_BREAST_CANCER_LUMINAL_VS_MESENCHYMAL_DN		446	-0.340599	-1.45632	0.0022805	0.119703	1	2109	tags=21%, list=10%, signal=23%	NA
WIERENGA_STAT5A_TARGETS_GROUP2	WIERENGA_STAT5A_TARGETS_GROUP2		59	-0.439972	-1.45607	0.0453125	0.11973	1	2478	tags=31%, list=11%, signal=34%	NA
FLECHNER_PBL_KIDNEY_TRANSPLANT_OK_VS_DONOR_UP	FLECHNER_PBL_KIDNEY_TRANSPLANT_OK_VS_DONOR_UP		147	-0.379144	-1.45547	0.0183876	0.119985	1	2992	tags=27%, list=14%, signal=31%	NA
MARSON_FOXP3_CORE_DIRECT_TARGETS	MARSON_FOXP3_CORE_DIRECT_TARGETS		19	-0.538462	-1.45538	0.0854545	0.119854	1	860	tags=21%, list=4%, signal=22%	NA
RICKMAN_TUMOR_DIFFERENTIATED_WELL_VS_POORLY_DN	RICKMAN_TUMOR_DIFFERENTIATED_WELL_VS_POORLY_DN		361	-0.342802	-1.45529	0.00357995	0.11974	1	2374	tags=20%, list=11%, signal=22%	NA
AMIT_EGF_RESPONSE_120_HELA	AMIT_EGF_RESPONSE_120_HELA		67	-0.428594	-1.45461	0.0552147	0.12014	1	2700	tags=28%, list=12%, signal=32%	NA
DORN_ADENOVIRUS_INFECTION_48HR_DN	DORN_ADENOVIRUS_INFECTION_48HR_DN		40	-0.466891	-1.45295	0.0633914	0.121288	1	2876	tags=35%, list=13%, signal=40%	NA
PASINI_SUZ12_TARGETS_DN	PASINI_SUZ12_TARGETS_DN		310	-0.3502	-1.45168	0.0036452	0.122084	1	2770	tags=24%, list=13%, signal=27%	NA
SIMBULAN_UV_RESPONSE_NORMAL_DN	SIMBULAN_UV_RESPONSE_NORMAL_DN		33	-0.483258	-1.45152	0.0614334	0.122022	1	2374	tags=27%, list=11%, signal=31%	NA
FRIDMAN_IMMORTALIZATION_DN	FRIDMAN_IMMORTALIZATION_DN		33	-0.489877	-1.45145	0.0705244	0.121889	1	2740	tags=45%, list=13%, signal=52%	NA
GAUSSMANN_MLL_AF4_FUSION_TARGETS_C_UP	GAUSSMANN_MLL_AF4_FUSION_TARGETS_C_UP		166	-0.371162	-1.45135	0.0160214	0.121795	1	3797	tags=35%, list=18%, signal=42%	NA
WARTERS_IR_RESPONSE_5GY	WARTERS_IR_RESPONSE_5GY		47	-0.450589	-1.45081	0.0539683	0.12205	1	3090	tags=32%, list=14%, signal=37%	NA
WINTER_HYPOXIA_METAGENE	WINTER_HYPOXIA_METAGENE		234	-0.36056	-1.45033	0.0143229	0.122237	1	2228	tags=20%, list=10%, signal=22%	NA
GARGALOVIC_RESPONSE_TO_OXIDIZED_PHOSPHOLIPIDS_BLUE_UP	GARGALOVIC_RESPONSE_TO_OXIDIZED_PHOSPHOLIPIDS_BLUE_UP		122	-0.382435	-1.44979	0.0367232	0.122426	1	3731	tags=34%, list=17%, signal=41%	NA
RODRIGUES_THYROID_CARCINOMA_ANAPLASTIC_DN	RODRIGUES_THYROID_CARCINOMA_ANAPLASTIC_DN		484	-0.337334	-1.44935	0.00115607	0.122557	1	3271	tags=27%, list=15%, signal=31%	NA
NEWMAN_ERCC6_TARGETS_DN	NEWMAN_ERCC6_TARGETS_DN		39	-0.472501	-1.44799	0.0606557	0.123496	1	1042	tags=13%, list=5%, signal=13%	NA
HAHTOLA_SEZARY_SYNDROM_UP	HAHTOLA_SEZARY_SYNDROM_UP		93	-0.396829	-1.44702	0.0327635	0.124009	1	1319	tags=19%, list=6%, signal=21%	NA
YAO_TEMPORAL_RESPONSE_TO_PROGESTERONE_CLUSTER_0	YAO_TEMPORAL_RESPONSE_TO_PROGESTERONE_CLUSTER_0		72	-0.420602	-1.44654	0.0515464	0.124207	1	3701	tags=33%, list=17%, signal=40%	NA
CHICAS_RB1_TARGETS_SENESCENT	CHICAS_RB1_TARGETS_SENESCENT		546	-0.334881	-1.44561	0	0.124782	1	3246	tags=25%, list=15%, signal=29%	NA
WEIGEL_OXIDATIVE_STRESS_RESPONSE	WEIGEL_OXIDATIVE_STRESS_RESPONSE		34	-0.47508	-1.44546	0.0651085	0.124705	1	1790	tags=26%, list=8%, signal=29%	NA
IGLESIAS_E2F_TARGETS_UP	IGLESIAS_E2F_TARGETS_UP		150	-0.37533	-1.44498	0.0161943	0.124892	1	2680	tags=26%, list=12%, signal=29%	NA
BREDEMEYER_RAG_SIGNALING_NOT_VIA_ATM_DN	BREDEMEYER_RAG_SIGNALING_NOT_VIA_ATM_DN		56	-0.433157	-1.44344	0.0587302	0.12599	1	2690	tags=27%, list=12%, signal=31%	NA
BROWNE_HCMV_INFECTION_12HR_DN	BROWNE_HCMV_INFECTION_12HR_DN		98	-0.398137	-1.44283	0.03125	0.126281	1	3375	tags=28%, list=16%, signal=32%	NA
AZARE_NEOPLASTIC_TRANSFORMATION_BY_STAT3_UP	AZARE_NEOPLASTIC_TRANSFORMATION_BY_STAT3_UP		115	-0.389113	-1.44263	0.0286123	0.126236	1	2770	tags=27%, list=13%, signal=31%	NA
RODRIGUES_THYROID_CARCINOMA_POORLY_DIFFERENTIATED_UP	RODRIGUES_THYROID_CARCINOMA_POORLY_DIFFERENTIATED_UP		609	-0.330676	-1.44263	0	0.126047	1	3633	tags=35%, list=17%, signal=41%	NA
BARRIER_CANCER_RELAPSE_NORMAL_SAMPLE_UP	BARRIER_CANCER_RELAPSE_NORMAL_SAMPLE_UP		32	-0.482019	-1.44255	0.0696864	0.12593	1	3583	tags=41%, list=17%, signal=49%	NA
GOLDRATH_ANTIGEN_RESPONSE	GOLDRATH_ANTIGEN_RESPONSE		337	-0.344088	-1.44189	0.00724638	0.126284	1	2478	tags=26%, list=11%, signal=29%	NA
KANG_IMMORTALIZED_BY_TERT_UP	KANG_IMMORTALIZED_BY_TERT_UP		89	-0.406094	-1.44152	0.0324484	0.126361	1	2137	tags=17%, list=10%, signal=19%	NA
TIEN_INTESTINE_PROBIOTICS_6HR_DN	TIEN_INTESTINE_PROBIOTICS_6HR_DN		162	-0.368026	-1.44146	0.0218281	0.126224	1	2978	tags=30%, list=14%, signal=34%	NA
ONDER_CDH1_TARGETS_1_DN	ONDER_CDH1_TARGETS_1_DN		168	-0.365603	-1.4393	0.00531915	0.127851	1	2973	tags=28%, list=14%, signal=32%	NA
TERAO_AOX4_TARGETS_SKIN_DN	TERAO_AOX4_TARGETS_SKIN_DN		27	-0.505476	-1.43918	0.0731707	0.127758	1	3940	tags=44%, list=18%, signal=54%	NA
LIU_TARGETS_OF_VMYB_VS_CMYB_DN	LIU_TARGETS_OF_VMYB_VS_CMYB_DN		42	-0.450468	-1.43825	0.0617696	0.128318	1	963	tags=19%, list=4%, signal=20%	NA
VALK_AML_CLUSTER_9	VALK_AML_CLUSTER_9		34	-0.46874	-1.437	0.0748299	0.129163	1	12	tags=6%, list=0%, signal=6%	NA
FURUKAWA_DUSP6_TARGETS_PCI35_UP	FURUKAWA_DUSP6_TARGETS_PCI35_UP		70	-0.41764	-1.43605	0.0563166	0.129678	1	1317	tags=19%, list=6%, signal=20%	NA
GAZDA_DIAMOND_BLACKFAN_ANEMIA_PROGENITOR_DN	GAZDA_DIAMOND_BLACKFAN_ANEMIA_PROGENITOR_DN		62	-0.427284	-1.43554	0.0580848	0.129902	1	3306	tags=42%, list=15%, signal=49%	NA
VANTVEER_BREAST_CANCER_ESR1_DN	VANTVEER_BREAST_CANCER_ESR1_DN		229	-0.356142	-1.43521	0.0164975	0.129969	1	1888	tags=20%, list=9%, signal=21%	NA
CHIBA_RESPONSE_TO_TSA	CHIBA_RESPONSE_TO_TSA		47	-0.454196	-1.43418	0.0529695	0.130587	1	1319	tags=17%, list=6%, signal=18%	NA
MCBRYAN_PUBERTAL_BREAST_6_7WK_UP	MCBRYAN_PUBERTAL_BREAST_6_7WK_UP		192	-0.363248	-1.43407	0.0145503	0.130463	1	3241	tags=26%, list=15%, signal=30%	NA
DORN_ADENOVIRUS_INFECTION_32HR_DN	DORN_ADENOVIRUS_INFECTION_32HR_DN		39	-0.46541	-1.43397	0.0640394	0.130358	1	2876	tags=36%, list=13%, signal=41%	NA
BARIS_THYROID_CANCER_DN	BARIS_THYROID_CANCER_DN		59	-0.426305	-1.4335	0.0546022	0.130565	1	4534	tags=41%, list=21%, signal=51%	NA
SHAFFER_IRF4_TARGETS_IN_MYELOMA_VS_MATURE_B_LYMPHOCYTE	SHAFFER_IRF4_TARGETS_IN_MYELOMA_VS_MATURE_B_LYMPHOCYTE		101	-0.388111	-1.43301	0.0453858	0.130816	1	2478	tags=27%, list=11%, signal=30%	NA
GAUSSMANN_MLL_AF4_FUSION_TARGETS_B_UP	GAUSSMANN_MLL_AF4_FUSION_TARGETS_B_UP		26	-0.498218	-1.43291	0.0904255	0.130717	1	2429	tags=31%, list=11%, signal=35%	NA
JIANG_HYPOXIA_CANCER	JIANG_HYPOXIA_CANCER		78	-0.405834	-1.43232	0.0381098	0.131015	1	3563	tags=29%, list=16%, signal=35%	NA
MORI_LARGE_PRE_BII_LYMPHOCYTE_DN	MORI_LARGE_PRE_BII_LYMPHOCYTE_DN		57	-0.431497	-1.43193	0.0507937	0.131157	1	3178	tags=37%, list=15%, signal=43%	NA
VERNOCHET_ADIPOGENESIS	VERNOCHET_ADIPOGENESIS		19	-0.526748	-1.4317	0.103261	0.131142	1	2546	tags=26%, list=12%, signal=30%	NA
GERHOLD_ADIPOGENESIS_DN	GERHOLD_ADIPOGENESIS_DN		62	-0.431218	-1.43137	0.0510046	0.131225	1	1685	tags=21%, list=8%, signal=23%	NA
RODWELL_AGING_KIDNEY_NO_BLOOD_DN	RODWELL_AGING_KIDNEY_NO_BLOOD_DN		145	-0.373998	-1.43091	0.027894	0.131381	1	3837	tags=31%, list=18%, signal=37%	NA
DEMAGALHAES_AGING_UP	DEMAGALHAES_AGING_UP		54	-0.430987	-1.4309	0.0544872	0.131202	1	1700	tags=26%, list=8%, signal=28%	NA
GERHOLD_ADIPOGENESIS_UP	GERHOLD_ADIPOGENESIS_UP		49	-0.444838	-1.43031	0.0555556	0.131493	1	1919	tags=22%, list=9%, signal=25%	NA
STEGER_ADIPOGENESIS_UP	STEGER_ADIPOGENESIS_UP		21	-0.514824	-1.43031	0.0774527	0.131305	1	1612	tags=24%, list=7%, signal=26%	NA
MULLIGHAN_MLL_SIGNATURE_1_UP	MULLIGHAN_MLL_SIGNATURE_1_UP		363	-0.338318	-1.4299	0.00361882	0.131478	1	3441	tags=31%, list=16%, signal=36%	NA
TCGA_GLIOBLASTOMA_COPY_NUMBER_UP	TCGA_GLIOBLASTOMA_COPY_NUMBER_UP		71	-0.41564	-1.42966	0.0620155	0.131511	1	3670	tags=39%, list=17%, signal=47%	NA
DIRMEIER_LMP1_RESPONSE_LATE_DN	DIRMEIER_LMP1_RESPONSE_LATE_DN		31	-0.487336	-1.42941	0.079258	0.131484	1	1119	tags=16%, list=5%, signal=17%	NA
KYNG_WERNER_SYNDROM_UP	KYNG_WERNER_SYNDROM_UP		18	-0.550972	-1.42938	0.0936937	0.131318	1	4305	tags=56%, list=20%, signal=69%	NA
SCHRAMM_INHBA_TARGETS_DN	SCHRAMM_INHBA_TARGETS_DN		24	-0.504802	-1.42935	0.0787671	0.13116	1	2400	tags=42%, list=11%, signal=47%	NA
MCBRYAN_PUBERTAL_BREAST_4_5WK_DN	MCBRYAN_PUBERTAL_BREAST_4_5WK_DN		187	-0.361916	-1.42689	0.0167742	0.132965	1	2368	tags=22%, list=11%, signal=25%	NA
GOZGIT_ESR1_TARGETS_UP	GOZGIT_ESR1_TARGETS_UP		136	-0.374038	-1.4263	0.02391	0.133275	1	2573	tags=23%, list=12%, signal=26%	NA
WANG_SMARCE1_TARGETS_DN	WANG_SMARCE1_TARGETS_DN		358	-0.339086	-1.42594	0.00608273	0.133394	1	3193	tags=26%, list=15%, signal=30%	NA
ROME_INSULIN_TARGETS_IN_MUSCLE_UP	ROME_INSULIN_TARGETS_IN_MUSCLE_UP		416	-0.332828	-1.42563	0.00449944	0.133453	1	3884	tags=32%, list=18%, signal=38%	NA
TORCHIA_TARGETS_OF_EWSR1_FLI1_FUSION_DN	TORCHIA_TARGETS_OF_EWSR1_FLI1_FUSION_DN		311	-0.342418	-1.42537	0.00240096	0.133497	1	3198	tags=27%, list=15%, signal=31%	NA
IIZUKA_LIVER_CANCER_PROGRESSION_G2_G3_UP	IIZUKA_LIVER_CANCER_PROGRESSION_G2_G3_UP		28	-0.483987	-1.42473	0.0780142	0.133851	1	2459	tags=25%, list=11%, signal=28%	NA
GRAHAM_CML_QUIESCENT_VS_NORMAL_DIVIDING_UP	GRAHAM_CML_QUIESCENT_VS_NORMAL_DIVIDING_UP		54	-0.43488	-1.42448	0.0571429	0.133854	1	2700	tags=35%, list=12%, signal=40%	NA
ALCALA_APOPTOSIS	ALCALA_APOPTOSIS		87	-0.398779	-1.42403	0.0359712	0.134	1	4142	tags=43%, list=19%, signal=52%	NA
WENG_POR_TARGETS_LIVER_UP	WENG_POR_TARGETS_LIVER_UP		41	-0.450262	-1.42391	0.0708535	0.133917	1	2077	tags=27%, list=10%, signal=30%	NA
HOFFMANN_SMALL_PRE_BII_TO_IMMATURE_B_LYMPHOCYTE_UP	HOFFMANN_SMALL_PRE_BII_TO_IMMATURE_B_LYMPHOCYTE_UP		68	-0.410502	-1.423	0.0458136	0.134547	1	3206	tags=32%, list=15%, signal=38%	NA
HU_ANGIOGENESIS_UP	HU_ANGIOGENESIS_UP		20	-0.530515	-1.42295	0.0851449	0.134394	1	955	tags=30%, list=4%, signal=31%	NA
AMUNDSON_RESPONSE_TO_ARSENITE	AMUNDSON_RESPONSE_TO_ARSENITE		214	-0.355799	-1.42289	0.00793651	0.134244	1	3158	tags=32%, list=15%, signal=37%	NA
ABBUD_LIF_SIGNALING_1_DN	ABBUD_LIF_SIGNALING_1_DN		25	-0.507612	-1.42257	0.108153	0.134335	1	1233	tags=20%, list=6%, signal=21%	NA
DOANE_RESPONSE_TO_ANDROGEN_DN	DOANE_RESPONSE_TO_ANDROGEN_DN		237	-0.354259	-1.42193	0.012837	0.134744	1	2842	tags=20%, list=13%, signal=23%	NA
CHAUHAN_RESPONSE_TO_METHOXYESTRADIOL_DN	CHAUHAN_RESPONSE_TO_METHOXYESTRADIOL_DN		99	-0.388888	-1.42159	0.045045	0.134854	1	3602	tags=35%, list=17%, signal=42%	NA
IWANAGA_CARCINOGENESIS_BY_KRAS_PTEN_UP	IWANAGA_CARCINOGENESIS_BY_KRAS_PTEN_UP		170	-0.362763	-1.42111	0.0316804	0.135079	1	3215	tags=26%, list=15%, signal=30%	NA
MARIADASON_RESPONSE_TO_BUTYRATE_SULINDAC_6	MARIADASON_RESPONSE_TO_BUTYRATE_SULINDAC_6		49	-0.443866	-1.41942	0.0696095	0.136359	1	2035	tags=27%, list=9%, signal=29%	NA
KIM_WT1_TARGETS_8HR_DN	KIM_WT1_TARGETS_8HR_DN		120	-0.378448	-1.41813	0.0335664	0.137312	1	2902	tags=23%, list=13%, signal=27%	NA
SETLUR_PROSTATE_CANCER_TMPRSS2_ERG_FUSION_DN	SETLUR_PROSTATE_CANCER_TMPRSS2_ERG_FUSION_DN		20	-0.52053	-1.41794	0.095941	0.137307	1	139	tags=10%, list=1%, signal=10%	NA
CAIRO_HEPATOBLASTOMA_UP	CAIRO_HEPATOBLASTOMA_UP		203	-0.354714	-1.41725	0.0209699	0.137754	1	3377	tags=30%, list=16%, signal=35%	NA
KORKOLA_TERATOMA_UP	KORKOLA_TERATOMA_UP		16	-0.562703	-1.41637	0.104167	0.138312	1	2103	tags=31%, list=10%, signal=35%	NA
GHANDHI_DIRECT_IRRADIATION_UP	GHANDHI_DIRECT_IRRADIATION_UP		104	-0.391685	-1.41587	0.0467836	0.138545	1	2258	tags=24%, list=10%, signal=27%	NA
GAUSSMANN_MLL_AF4_FUSION_TARGETS_A_UP	GAUSSMANN_MLL_AF4_FUSION_TARGETS_A_UP		185	-0.357009	-1.415	0.0291391	0.139172	1	3796	tags=30%, list=18%, signal=36%	NA
HEDENFALK_BREAST_CANCER_BRACX_DN	HEDENFALK_BREAST_CANCER_BRACX_DN		20	-0.515126	-1.41464	0.101124	0.139316	1	3132	tags=45%, list=14%, signal=53%	NA
LINDSTEDT_DENDRITIC_CELL_MATURATION_A	LINDSTEDT_DENDRITIC_CELL_MATURATION_A		67	-0.41584	-1.41437	0.0480349	0.139362	1	1332	tags=22%, list=6%, signal=24%	NA
WANG_LSD1_TARGETS_UP	WANG_LSD1_TARGETS_UP		23	-0.521796	-1.41412	0.0960854	0.13939	1	869	tags=17%, list=4%, signal=18%	NA
DORN_ADENOVIRUS_INFECTION_24HR_DN	DORN_ADENOVIRUS_INFECTION_24HR_DN		43	-0.457865	-1.4126	0.0822368	0.140482	1	2937	tags=40%, list=14%, signal=46%	NA
WANG_CLASSIC_ADIPOGENIC_TARGETS_OF_PPARG	WANG_CLASSIC_ADIPOGENIC_TARGETS_OF_PPARG		26	-0.501473	-1.4117	0.0958678	0.141079	1	2540	tags=31%, list=12%, signal=35%	NA
WOOD_EBV_EBNA1_TARGETS_DN	WOOD_EBV_EBNA1_TARGETS_DN		47	-0.437407	-1.41059	0.0611285	0.141891	1	4019	tags=49%, list=19%, signal=60%	NA
ZHONG_RESPONSE_TO_AZACITIDINE_AND_TSA_UP	ZHONG_RESPONSE_TO_AZACITIDINE_AND_TSA_UP		180	-0.357303	-1.40932	0.0171958	0.142837	1	3190	tags=24%, list=15%, signal=28%	NA
ACEVEDO_NORMAL_TISSUE_ADJACENT_TO_LIVER_TUMOR_UP	ACEVEDO_NORMAL_TISSUE_ADJACENT_TO_LIVER_TUMOR_UP		160	-0.366826	-1.40928	0.0161943	0.142663	1	4055	tags=32%, list=19%, signal=39%	NA
IWANAGA_CARCINOGENESIS_BY_KRAS_DN	IWANAGA_CARCINOGENESIS_BY_KRAS_DN		118	-0.378032	-1.40807	0.0413105	0.143621	1	2546	tags=20%, list=12%, signal=23%	NA
VERHAAK_AML_WITH_NPM1_MUTATED_DN	VERHAAK_AML_WITH_NPM1_MUTATED_DN		239	-0.34764	-1.40725	0.0192061	0.14417	1	1089	tags=11%, list=5%, signal=11%	NA
LEE_LIVER_CANCER_MYC_TGFA_DN	LEE_LIVER_CANCER_MYC_TGFA_DN		62	-0.426142	-1.40683	0.0532081	0.14433	1	527	tags=11%, list=2%, signal=12%	NA
PEDRIOLI_MIR31_TARGETS_DN	PEDRIOLI_MIR31_TARGETS_DN		391	-0.330209	-1.40585	0.00578704	0.145033	1	2635	tags=18%, list=12%, signal=21%	NA
MENSE_HYPOXIA_UP	MENSE_HYPOXIA_UP		95	-0.387824	-1.40548	0.0536232	0.145184	1	3480	tags=38%, list=16%, signal=45%	NA
SILIGAN_TARGETS_OF_EWS_FLI1_FUSION_UP	SILIGAN_TARGETS_OF_EWS_FLI1_FUSION_UP		15	-0.55956	-1.40506	0.0990991	0.145377	1	3556	tags=47%, list=16%, signal=56%	NA
GARGALOVIC_RESPONSE_TO_OXIDIZED_PHOSPHOLIPIDS_GREY_UP	GARGALOVIC_RESPONSE_TO_OXIDIZED_PHOSPHOLIPIDS_GREY_UP		16	-0.549183	-1.40492	0.0984183	0.14531	1	2132	tags=31%, list=10%, signal=35%	NA
LEE_BMP2_TARGETS_UP	LEE_BMP2_TARGETS_UP		718	-0.320584	-1.40488	0	0.145148	1	1901	tags=14%, list=9%, signal=15%	NA
MOOTHA_FFA_OXYDATION	MOOTHA_FFA_OXYDATION		22	-0.513048	-1.40442	0.0953237	0.145341	1	3607	tags=45%, list=17%, signal=54%	NA
KINSEY_TARGETS_OF_EWSR1_FLII_FUSION_DN	KINSEY_TARGETS_OF_EWSR1_FLII_FUSION_DN		310	-0.340052	-1.40411	0.0145631	0.145433	1	2788	tags=23%, list=13%, signal=26%	NA
NADERI_BREAST_CANCER_PROGNOSIS_DN	NADERI_BREAST_CANCER_PROGNOSIS_DN		18	-0.528298	-1.40409	0.107584	0.145263	1	2077	tags=22%, list=10%, signal=25%	NA
YAGI_AML_WITH_11Q23_REARRANGED	YAGI_AML_WITH_11Q23_REARRANGED		339	-0.333971	-1.40166	0.0106509	0.147194	1	3238	tags=27%, list=15%, signal=32%	NA
PLASARI_TGFB1_SIGNALING_VIA_NFIC_1HR_DN	PLASARI_TGFB1_SIGNALING_VIA_NFIC_1HR_DN		103	-0.383035	-1.40155	0.0333817	0.147102	1	3464	tags=27%, list=16%, signal=32%	NA
LEE_CALORIE_RESTRICTION_MUSCLE_DN	LEE_CALORIE_RESTRICTION_MUSCLE_DN		51	-0.43255	-1.4012	0.0770492	0.147212	1	2973	tags=31%, list=14%, signal=36%	NA
SUZUKI_RESPONSE_TO_TSA_AND_DECITABINE_1B	SUZUKI_RESPONSE_TO_TSA_AND_DECITABINE_1B		22	-0.515408	-1.3992	0.100167	0.148877	1	1045	tags=14%, list=5%, signal=14%	NA
SILIGAN_TARGETS_OF_EWS_FLI1_FUSION_DN	SILIGAN_TARGETS_OF_EWS_FLI1_FUSION_DN		17	-0.539574	-1.39755	0.115993	0.150233	1	1350	tags=29%, list=6%, signal=31%	NA
FAELT_B_CLL_WITH_VH_REARRANGEMENTS_UP	FAELT_B_CLL_WITH_VH_REARRANGEMENTS_UP		47	-0.43964	-1.39682	0.0790774	0.150737	1	2512	tags=45%, list=12%, signal=50%	NA
IIZUKA_LIVER_CANCER_PROGRESSION_G1_G2_DN	IIZUKA_LIVER_CANCER_PROGRESSION_G1_G2_DN		24	-0.497725	-1.39655	0.106061	0.150832	1	4830	tags=58%, list=22%, signal=75%	NA
CHIANG_LIVER_CANCER_SUBCLASS_UNANNOTATED_UP	CHIANG_LIVER_CANCER_SUBCLASS_UNANNOTATED_UP		79	-0.398107	-1.39606	0.0722892	0.151075	1	2900	tags=25%, list=13%, signal=29%	NA
FERRANDO_HOX11_NEIGHBORS	FERRANDO_HOX11_NEIGHBORS		23	-0.497171	-1.39576	0.10453	0.151139	1	1084	tags=13%, list=5%, signal=14%	NA
LIM_MAMMARY_STEM_CELL_DN	LIM_MAMMARY_STEM_CELL_DN		418	-0.329713	-1.39532	0.00584112	0.151356	1	3945	tags=28%, list=18%, signal=34%	NA
KYNG_DNA_DAMAGE_UP	KYNG_DNA_DAMAGE_UP		223	-0.348181	-1.39362	0.023622	0.152776	1	3235	tags=26%, list=15%, signal=30%	NA
BRUECKNER_TARGETS_OF_MIRLET7A3_DN	BRUECKNER_TARGETS_OF_MIRLET7A3_DN		71	-0.403792	-1.39327	0.0578635	0.15289	1	2841	tags=32%, list=13%, signal=37%	NA
BENPORATH_SOX2_TARGETS	BENPORATH_SOX2_TARGETS		712	-0.316129	-1.39183	0.00216216	0.154027	1	3740	tags=28%, list=17%, signal=33%	NA
WANG_IMMORTALIZED_BY_HOXA9_AND_MEIS1_DN	WANG_IMMORTALIZED_BY_HOXA9_AND_MEIS1_DN		24	-0.489999	-1.39162	0.0877193	0.154025	1	820	tags=25%, list=4%, signal=26%	NA
DAIRKEE_TERT_TARGETS_DN	DAIRKEE_TERT_TARGETS_DN		117	-0.371008	-1.39105	0.0394366	0.154383	1	2417	tags=21%, list=11%, signal=24%	NA
BENPORATH_NANOG_TARGETS	BENPORATH_NANOG_TARGETS		954	-0.312933	-1.39066	0.00210748	0.154549	1	3706	tags=27%, list=17%, signal=31%	NA
HUPER_BREAST_BASAL_VS_LUMINAL_UP	HUPER_BREAST_BASAL_VS_LUMINAL_UP		53	-0.432191	-1.39054	0.0928339	0.154457	1	382	tags=11%, list=2%, signal=11%	NA
RIZKI_TUMOR_INVASIVENESS_3D_DN	RIZKI_TUMOR_INVASIVENESS_3D_DN		263	-0.337635	-1.39001	0.0126582	0.154784	1	3625	tags=29%, list=17%, signal=34%	NA
MURAKAMI_UV_RESPONSE_6HR_DN	MURAKAMI_UV_RESPONSE_6HR_DN		21	-0.51023	-1.38941	0.129371	0.155098	1	240	tags=10%, list=1%, signal=10%	NA
YAGI_AML_RELAPSE_PROGNOSIS	YAGI_AML_RELAPSE_PROGNOSIS		34	-0.458763	-1.38791	0.105263	0.156319	1	1026	tags=21%, list=5%, signal=22%	NA
FOSTER_KDM1A_TARGETS_UP	FOSTER_KDM1A_TARGETS_UP		253	-0.33921	-1.38768	0.0235149	0.156332	1	1791	tags=12%, list=8%, signal=13%	NA
YAO_TEMPORAL_RESPONSE_TO_PROGESTERONE_CLUSTER_6	YAO_TEMPORAL_RESPONSE_TO_PROGESTERONE_CLUSTER_6		74	-0.397952	-1.38764	0.0580848	0.156168	1	1126	tags=16%, list=5%, signal=17%	NA
RASHI_RESPONSE_TO_IONIZING_RADIATION_2	RASHI_RESPONSE_TO_IONIZING_RADIATION_2		126	-0.36747	-1.38758	0.0319444	0.156014	1	1663	tags=19%, list=8%, signal=21%	NA
HUTTMANN_B_CLL_POOR_SURVIVAL_UP	HUTTMANN_B_CLL_POOR_SURVIVAL_UP		264	-0.33802	-1.38724	0.0216561	0.156074	1	1367	tags=13%, list=6%, signal=13%	NA
ROSS_AML_WITH_CBFB_MYH11_FUSION	ROSS_AML_WITH_CBFB_MYH11_FUSION		51	-0.425591	-1.38699	0.0910569	0.156142	1	2710	tags=29%, list=13%, signal=34%	NA
FARMER_BREAST_CANCER_BASAL_VS_LULMINAL	FARMER_BREAST_CANCER_BASAL_VS_LULMINAL		321	-0.336244	-1.38649	0.00954654	0.156413	1	3008	tags=24%, list=14%, signal=27%	NA
GARGALOVIC_RESPONSE_TO_OXIDIZED_PHOSPHOLIPIDS_GREEN_UP	GARGALOVIC_RESPONSE_TO_OXIDIZED_PHOSPHOLIPIDS_GREEN_UP		23	-0.498204	-1.38639	0.103571	0.156297	1	4101	tags=48%, list=19%, signal=59%	NA
SMIRNOV_RESPONSE_TO_IR_6HR_DN	SMIRNOV_RESPONSE_TO_IR_6HR_DN		110	-0.371539	-1.386	0.0571848	0.156473	1	2512	tags=25%, list=12%, signal=28%	NA
VANASSE_BCL2_TARGETS_DN	VANASSE_BCL2_TARGETS_DN		71	-0.399319	-1.38594	0.06298	0.156335	1	2017	tags=20%, list=9%, signal=22%	NA
NAGASHIMA_EGF_SIGNALING_UP	NAGASHIMA_EGF_SIGNALING_UP		57	-0.423073	-1.38575	0.0801282	0.156321	1	2910	tags=30%, list=13%, signal=34%	NA
DORSAM_HOXA9_TARGETS_DN	DORSAM_HOXA9_TARGETS_DN		32	-0.462586	-1.38502	0.0984183	0.156765	1	2104	tags=41%, list=10%, signal=45%	NA
CASTELLANO_NRAS_TARGETS_UP	CASTELLANO_NRAS_TARGETS_UP		66	-0.408361	-1.38496	0.0642202	0.156609	1	1799	tags=21%, list=8%, signal=23%	NA
LANDIS_ERBB2_BREAST_TUMORS_65_DN	LANDIS_ERBB2_BREAST_TUMORS_65_DN		36	-0.451149	-1.38427	0.0821256	0.157059	1	2205	tags=22%, list=10%, signal=25%	NA
WORSCHECH_TUMOR_REJECTION_UP	WORSCHECH_TUMOR_REJECTION_UP		56	-0.414099	-1.38399	0.0796875	0.157133	1	1996	tags=18%, list=9%, signal=20%	NA
FULCHER_INFLAMMATORY_RESPONSE_LECTIN_VS_LPS_UP	FULCHER_INFLAMMATORY_RESPONSE_LECTIN_VS_LPS_UP		544	-0.317789	-1.38376	0	0.157137	1	2597	tags=22%, list=12%, signal=25%	NA
CROONQUIST_STROMAL_STIMULATION_UP	CROONQUIST_STROMAL_STIMULATION_UP		59	-0.406636	-1.38253	0.0710901	0.158117	1	833	tags=12%, list=4%, signal=12%	NA
MORI_MATURE_B_LYMPHOCYTE_UP	MORI_MATURE_B_LYMPHOCYTE_UP		88	-0.389595	-1.38205	0.0631277	0.158385	1	3349	tags=38%, list=15%, signal=44%	NA
ZEMBUTSU_SENSITIVITY_TO_VINBLASTINE	ZEMBUTSU_SENSITIVITY_TO_VINBLASTINE		17	-0.529781	-1.37828	0.114082	0.161871	1	5296	tags=47%, list=24%, signal=62%	NA
YAGI_AML_FAB_MARKERS	YAGI_AML_FAB_MARKERS		187	-0.347726	-1.37824	0.0425806	0.161718	1	3255	tags=26%, list=15%, signal=30%	NA
DAZARD_UV_RESPONSE_CLUSTER_G2	DAZARD_UV_RESPONSE_CLUSTER_G2		30	-0.482713	-1.37758	0.113208	0.162156	1	2661	tags=37%, list=12%, signal=42%	NA
KIM_ALL_DISORDERS_OLIGODENDROCYTE_NUMBER_CORR_DN	KIM_ALL_DISORDERS_OLIGODENDROCYTE_NUMBER_CORR_DN		32	-0.464882	-1.37682	0.106239	0.162744	1	2614	tags=22%, list=12%, signal=25%	NA
DELACROIX_RARG_BOUND_MEF	DELACROIX_RARG_BOUND_MEF		358	-0.328513	-1.37551	0.00849515	0.163823	1	2828	tags=20%, list=13%, signal=22%	NA
MA_PITUITARY_FETAL_VS_ADULT_UP	MA_PITUITARY_FETAL_VS_ADULT_UP		28	-0.470204	-1.37535	0.09319	0.163772	1	2774	tags=39%, list=13%, signal=45%	NA
KEEN_RESPONSE_TO_ROSIGLITAZONE_DN	KEEN_RESPONSE_TO_ROSIGLITAZONE_DN		103	-0.381441	-1.37467	0.05	0.164235	1	3619	tags=35%, list=17%, signal=42%	NA
KENNY_CTNNB1_TARGETS_UP	KENNY_CTNNB1_TARGETS_UP		47	-0.427768	-1.37446	0.0826709	0.164211	1	2952	tags=36%, list=14%, signal=42%	NA
HELLER_HDAC_TARGETS_SILENCED_BY_METHYLATION_UP	HELLER_HDAC_TARGETS_SILENCED_BY_METHYLATION_UP		443	-0.320503	-1.3744	0.00812065	0.164055	1	2953	tags=21%, list=14%, signal=24%	NA
KOKKINAKIS_METHIONINE_DEPRIVATION_96HR_UP	KOKKINAKIS_METHIONINE_DEPRIVATION_96HR_UP		116	-0.368603	-1.3742	0.0569878	0.164052	1	3144	tags=30%, list=15%, signal=35%	NA
GAZDA_DIAMOND_BLACKFAN_ANEMIA_ERYTHROID_DN	GAZDA_DIAMOND_BLACKFAN_ANEMIA_ERYTHROID_DN		473	-0.320425	-1.37256	0.00231214	0.165468	1	2946	tags=25%, list=14%, signal=28%	NA
BONCI_TARGETS_OF_MIR15A_AND_MIR16_1	BONCI_TARGETS_OF_MIR15A_AND_MIR16_1		90	-0.386295	-1.37189	0.0677233	0.165943	1	2955	tags=30%, list=14%, signal=35%	NA
NAKAMURA_CANCER_MICROENVIRONMENT_DN	NAKAMURA_CANCER_MICROENVIRONMENT_DN		43	-0.430211	-1.37174	0.0887772	0.165875	1	1770	tags=19%, list=8%, signal=20%	NA
CHEOK_RESPONSE_TO_MERCAPTOPURINE_AND_LD_MTX_DN	CHEOK_RESPONSE_TO_MERCAPTOPURINE_AND_LD_MTX_DN		20	-0.513641	-1.37083	0.126095	0.166622	1	3623	tags=45%, list=17%, signal=54%	NA
SU_PANCREAS	SU_PANCREAS		52	-0.419771	-1.3708	0.0897436	0.166459	1	1534	tags=15%, list=7%, signal=17%	NA
UDAYAKUMAR_MED1_TARGETS_DN	UDAYAKUMAR_MED1_TARGETS_DN		227	-0.335565	-1.37065	0.0232258	0.166399	1	2532	tags=25%, list=12%, signal=28%	NA
RODRIGUES_NTN1_TARGETS_DN	RODRIGUES_NTN1_TARGETS_DN		152	-0.350052	-1.37044	0.038874	0.166396	1	2546	tags=20%, list=12%, signal=23%	NA
LIU_TOPBP1_TARGETS	LIU_TOPBP1_TARGETS		15	-0.546283	-1.36989	0.120818	0.166748	1	1325	tags=27%, list=6%, signal=28%	NA
WANG_SMARCE1_TARGETS_UP	WANG_SMARCE1_TARGETS_UP		272	-0.332353	-1.36688	0.0264151	0.169604	1	2205	tags=15%, list=10%, signal=17%	NA
SATO_SILENCED_BY_METHYLATION_IN_PANCREATIC_CANCER_1	SATO_SILENCED_BY_METHYLATION_IN_PANCREATIC_CANCER_1		409	-0.322975	-1.36618	0.00814901	0.170075	1	1278	tags=11%, list=6%, signal=12%	NA
KRIEG_KDM3A_TARGETS_NOT_HYPOXIA	KRIEG_KDM3A_TARGETS_NOT_HYPOXIA		189	-0.344695	-1.36617	0.0358056	0.169867	1	4699	tags=43%, list=22%, signal=54%	NA
BONOME_OVARIAN_CANCER_SURVIVAL_SUBOPTIMAL_DEBULKING	BONOME_OVARIAN_CANCER_SURVIVAL_SUBOPTIMAL_DEBULKING		494	-0.316328	-1.36604	0.0112994	0.169773	1	3580	tags=26%, list=17%, signal=31%	NA
LEE_LIVER_CANCER_MYC_UP	LEE_LIVER_CANCER_MYC_UP		54	-0.416387	-1.36534	0.0779436	0.170313	1	1454	tags=17%, list=7%, signal=18%	NA
MA_MYELOID_DIFFERENTIATION_DN	MA_MYELOID_DIFFERENTIATION_DN		44	-0.434287	-1.36489	0.0988655	0.170586	1	2326	tags=25%, list=11%, signal=28%	NA
BOYLAN_MULTIPLE_MYELOMA_PCA3_DN	BOYLAN_MULTIPLE_MYELOMA_PCA3_DN		67	-0.399103	-1.36431	0.086072	0.170979	1	2884	tags=31%, list=13%, signal=36%	NA
HUMMERICH_SKIN_CANCER_PROGRESSION_DN	HUMMERICH_SKIN_CANCER_PROGRESSION_DN		100	-0.370786	-1.3641	0.059322	0.170941	1	2665	tags=19%, list=12%, signal=22%	NA
ONGUSAHA_TP53_TARGETS	ONGUSAHA_TP53_TARGETS		36	-0.448367	-1.36359	0.106845	0.17129	1	1668	tags=25%, list=8%, signal=27%	NA
MCBRYAN_PUBERTAL_TGFB1_TARGETS_DN	MCBRYAN_PUBERTAL_TGFB1_TARGETS_DN		62	-0.402207	-1.36353	0.0837209	0.171144	1	361	tags=8%, list=2%, signal=8%	NA
PHONG_TNF_RESPONSE_VIA_P38_COMPLETE	PHONG_TNF_RESPONSE_VIA_P38_COMPLETE		222	-0.339173	-1.36295	0.0355731	0.171543	1	3805	tags=37%, list=18%, signal=45%	NA
OHM_METHYLATED_IN_ADULT_CANCERS	OHM_METHYLATED_IN_ADULT_CANCERS		27	-0.480142	-1.36149	0.106529	0.172855	1	764	tags=11%, list=4%, signal=12%	NA
DUNNE_TARGETS_OF_AML1_MTG8_FUSION_DN	DUNNE_TARGETS_OF_AML1_MTG8_FUSION_DN		19	-0.532628	-1.36079	0.139313	0.173391	1	1451	tags=37%, list=7%, signal=39%	NA
DACOSTA_ERCC3_ALLELE_XPCS_VS_TTD_UP	DACOSTA_ERCC3_ALLELE_XPCS_VS_TTD_UP		28	-0.475317	-1.35997	0.119008	0.174013	1	357	tags=14%, list=2%, signal=15%	NA
MORI_PLASMA_CELL_UP	MORI_PLASMA_CELL_UP		50	-0.42337	-1.35976	0.102107	0.174006	1	2773	tags=30%, list=13%, signal=34%	NA
WIERENGA_STAT5A_TARGETS_GROUP1	WIERENGA_STAT5A_TARGETS_GROUP1		131	-0.359384	-1.35963	0.0547945	0.173925	1	1428	tags=14%, list=7%, signal=15%	NA
YAO_HOXA10_TARGETS_VIA_PROGESTERONE_UP	YAO_HOXA10_TARGETS_VIA_PROGESTERONE_UP		74	-0.395064	-1.3587	0.0656489	0.17468	1	984	tags=11%, list=5%, signal=11%	NA
IIZUKA_LIVER_CANCER_PROGRESSION_L0_L1_DN	IIZUKA_LIVER_CANCER_PROGRESSION_L0_L1_DN		21	-0.507393	-1.35837	0.128645	0.174839	1	4616	tags=57%, list=21%, signal=73%	NA
ROSS_AML_WITH_MLL_FUSIONS	ROSS_AML_WITH_MLL_FUSIONS		74	-0.393746	-1.35831	0.0838323	0.174684	1	2092	tags=27%, list=10%, signal=30%	NA
YIH_RESPONSE_TO_ARSENITE_C3	YIH_RESPONSE_TO_ARSENITE_C3		36	-0.442276	-1.35831	0.102819	0.174474	1	3061	tags=33%, list=14%, signal=39%	NA
JIANG_TIP30_TARGETS_UP	JIANG_TIP30_TARGETS_UP		44	-0.435433	-1.35779	0.10017	0.174832	1	2910	tags=27%, list=13%, signal=31%	NA
PENG_RAPAMYCIN_RESPONSE_UP	PENG_RAPAMYCIN_RESPONSE_UP		193	-0.343962	-1.35768	0.0423077	0.174732	1	2804	tags=22%, list=13%, signal=25%	NA
SHAFFER_IRF4_TARGETS_IN_ACTIVATED_B_LYMPHOCYTE	SHAFFER_IRF4_TARGETS_IN_ACTIVATED_B_LYMPHOCYTE		79	-0.383559	-1.35697	0.064275	0.175288	1	2208	tags=32%, list=10%, signal=35%	NA
GAVIN_PDE3B_TARGETS	GAVIN_PDE3B_TARGETS		21	-0.495718	-1.35604	0.132997	0.176044	1	2105	tags=29%, list=10%, signal=32%	NA
RADMACHER_AML_PROGNOSIS	RADMACHER_AML_PROGNOSIS		77	-0.385737	-1.35582	0.0725926	0.17608	1	1953	tags=21%, list=9%, signal=23%	NA
RATTENBACHER_BOUND_BY_CELF1	RATTENBACHER_BOUND_BY_CELF1		403	-0.317153	-1.35569	0.00231214	0.176006	1	2218	tags=18%, list=10%, signal=20%	NA
CASORELLI_ACUTE_PROMYELOCYTIC_LEUKEMIA_UP	CASORELLI_ACUTE_PROMYELOCYTIC_LEUKEMIA_UP		166	-0.351776	-1.35517	0.0612777	0.176396	1	3288	tags=29%, list=15%, signal=34%	NA
MOHANKUMAR_TLX1_TARGETS_UP	MOHANKUMAR_TLX1_TARGETS_UP		403	-0.320144	-1.35358	0.0199063	0.177857	1	2788	tags=25%, list=13%, signal=28%	NA
CHANDRAN_METASTASIS_UP	CHANDRAN_METASTASIS_UP		198	-0.339502	-1.35337	0.0484293	0.177871	1	3292	tags=33%, list=15%, signal=39%	NA
TAKEDA_TARGETS_OF_NUP98_HOXA9_FUSION_8D_DN	TAKEDA_TARGETS_OF_NUP98_HOXA9_FUSION_8D_DN		198	-0.339988	-1.35319	0.0359043	0.17781	1	2157	tags=20%, list=10%, signal=22%	NA
LUCAS_HNF4A_TARGETS_UP	LUCAS_HNF4A_TARGETS_UP		56	-0.407018	-1.35319	0.0924499	0.177608	1	2459	tags=27%, list=11%, signal=30%	NA
KANG_GIST_WITH_PDGFRA_UP	KANG_GIST_WITH_PDGFRA_UP		49	-0.419543	-1.35315	0.100977	0.177439	1	704	tags=14%, list=3%, signal=15%	NA
AFFAR_YY1_TARGETS_UP	AFFAR_YY1_TARGETS_UP		209	-0.337352	-1.35294	0.0405405	0.177462	1	2202	tags=14%, list=10%, signal=16%	NA
FOSTER_TOLERANT_MACROPHAGE_UP	FOSTER_TOLERANT_MACROPHAGE_UP		147	-0.35255	-1.35215	0.0572207	0.178092	1	2419	tags=21%, list=11%, signal=24%	NA
LEE_LIVER_CANCER	LEE_LIVER_CANCER		47	-0.425115	-1.35209	0.0988836	0.177947	1	955	tags=9%, list=4%, signal=9%	NA
ACEVEDO_LIVER_CANCER_WITH_H3K9ME3_DN	ACEVEDO_LIVER_CANCER_WITH_H3K9ME3_DN		113	-0.36577	-1.3516	0.0571429	0.178252	1	3841	tags=26%, list=18%, signal=31%	NA
HINATA_NFKB_TARGETS_KERATINOCYTE_UP	HINATA_NFKB_TARGETS_KERATINOCYTE_UP		91	-0.377269	-1.35011	0.0735069	0.179625	1	1431	tags=21%, list=7%, signal=22%	NA
FRIDMAN_SENESCENCE_UP	FRIDMAN_SENESCENCE_UP		77	-0.384232	-1.35001	0.0769231	0.17951	1	2811	tags=34%, list=13%, signal=39%	NA
SCHAEFFER_PROSTATE_DEVELOPMENT_6HR_UP	SCHAEFFER_PROSTATE_DEVELOPMENT_6HR_UP		165	-0.349366	-1.3496	0.0389972	0.179704	1	2868	tags=26%, list=13%, signal=30%	NA
ZHAN_MULTIPLE_MYELOMA_PR_DN	ZHAN_MULTIPLE_MYELOMA_PR_DN		44	-0.427459	-1.34953	0.112026	0.179566	1	1954	tags=23%, list=9%, signal=25%	NA
GAUSSMANN_MLL_AF4_FUSION_TARGETS_F_DN	GAUSSMANN_MLL_AF4_FUSION_TARGETS_F_DN		33	-0.45115	-1.34948	0.105442	0.179418	1	753	tags=18%, list=3%, signal=19%	NA
ZHANG_BREAST_CANCER_PROGENITORS_UP	ZHANG_BREAST_CANCER_PROGENITORS_UP		411	-0.317922	-1.34898	0.00808314	0.179723	1	3759	tags=34%, list=17%, signal=40%	NA
KIM_PTEN_TARGETS_UP	KIM_PTEN_TARGETS_UP		18	-0.515397	-1.3484	0.131579	0.180123	1	3090	tags=39%, list=14%, signal=45%	NA
NIKOLSKY_BREAST_CANCER_8Q12_Q22_AMPLICON	NIKOLSKY_BREAST_CANCER_8Q12_Q22_AMPLICON		126	-0.353866	-1.34741	0.0589928	0.180904	1	3271	tags=26%, list=15%, signal=31%	NA
PILON_KLF1_TARGETS_UP	PILON_KLF1_TARGETS_UP		491	-0.311077	-1.34706	0.00563063	0.181071	1	3139	tags=22%, list=14%, signal=25%	NA
KYNG_DNA_DAMAGE_DN	KYNG_DNA_DAMAGE_DN		193	-0.340503	-1.34663	0.0392157	0.181284	1	2881	tags=25%, list=13%, signal=28%	NA
HOLLMANN_APOPTOSIS_VIA_CD40_DN	HOLLMANN_APOPTOSIS_VIA_CD40_DN		253	-0.333283	-1.34639	0.0177665	0.181327	1	2660	tags=28%, list=12%, signal=32%	NA
DAVICIONI_MOLECULAR_ARMS_VS_ERMS_UP	DAVICIONI_MOLECULAR_ARMS_VS_ERMS_UP		317	-0.323401	-1.34626	0.0240096	0.181264	1	3934	tags=29%, list=18%, signal=35%	NA
MURAKAMI_UV_RESPONSE_24HR	MURAKAMI_UV_RESPONSE_24HR		20	-0.501936	-1.34579	0.124324	0.181563	1	240	tags=10%, list=1%, signal=10%	NA
BROWNE_HCMV_INFECTION_14HR_DN	BROWNE_HCMV_INFECTION_14HR_DN		290	-0.328682	-1.34562	0.0286426	0.18153	1	3138	tags=22%, list=14%, signal=26%	NA
BROWNE_HCMV_INFECTION_16HR_UP	BROWNE_HCMV_INFECTION_16HR_UP		221	-0.332973	-1.34538	0.0303797	0.181551	1	3682	tags=32%, list=17%, signal=38%	NA
KYNG_WERNER_SYNDROM_AND_NORMAL_AGING_UP	KYNG_WERNER_SYNDROM_AND_NORMAL_AGING_UP		89	-0.370964	-1.345	0.0703593	0.181705	1	3785	tags=33%, list=17%, signal=39%	NA
BERENJENO_TRANSFORMED_BY_RHOA_DN	BERENJENO_TRANSFORMED_BY_RHOA_DN		382	-0.318859	-1.34452	0.0166865	0.182023	1	3232	tags=26%, list=15%, signal=30%	NA
HOFFMANN_LARGE_TO_SMALL_PRE_BII_LYMPHOCYTE_DN	HOFFMANN_LARGE_TO_SMALL_PRE_BII_LYMPHOCYTE_DN		70	-0.388911	-1.34406	0.0880121	0.18229	1	1381	tags=14%, list=6%, signal=15%	NA
PARENT_MTOR_SIGNALING_DN	PARENT_MTOR_SIGNALING_DN		43	-0.425795	-1.34392	0.112211	0.182201	1	2675	tags=26%, list=12%, signal=29%	NA
WANG_RECURRENT_LIVER_CANCER_DN	WANG_RECURRENT_LIVER_CANCER_DN		16	-0.537519	-1.34367	0.144928	0.182268	1	2191	tags=25%, list=10%, signal=28%	NA
DURAND_STROMA_NS_UP	DURAND_STROMA_NS_UP		158	-0.347792	-1.34296	0.0444444	0.182818	1	2131	tags=18%, list=10%, signal=20%	NA
MCBRYAN_PUBERTAL_BREAST_3_4WK_DN	MCBRYAN_PUBERTAL_BREAST_3_4WK_DN		36	-0.441837	-1.34257	0.127986	0.183071	1	2016	tags=19%, list=9%, signal=21%	NA
ZHOU_INFLAMMATORY_RESPONSE_FIMA_DN	ZHOU_INFLAMMATORY_RESPONSE_FIMA_DN		263	-0.325966	-1.34214	0.0348692	0.183316	1	3321	tags=25%, list=15%, signal=29%	NA
HELLER_HDAC_TARGETS_DN	HELLER_HDAC_TARGETS_DN		282	-0.324255	-1.34156	0.0266667	0.183718	1	2128	tags=23%, list=10%, signal=25%	NA
BOYLAN_MULTIPLE_MYELOMA_D_DN	BOYLAN_MULTIPLE_MYELOMA_D_DN		73	-0.383494	-1.34005	0.109204	0.18516	1	3377	tags=38%, list=16%, signal=45%	NA
SMIRNOV_RESPONSE_TO_IR_2HR_DN	SMIRNOV_RESPONSE_TO_IR_2HR_DN		54	-0.408385	-1.33951	0.106624	0.185523	1	2867	tags=35%, list=13%, signal=40%	NA
SCHAEFFER_PROSTATE_DEVELOPMENT_48HR_UP	SCHAEFFER_PROSTATE_DEVELOPMENT_48HR_UP		466	-0.31293	-1.33905	0.0102273	0.185771	1	2844	tags=17%, list=13%, signal=19%	NA
ALONSO_METASTASIS_UP	ALONSO_METASTASIS_UP		191	-0.336626	-1.33796	0.0391414	0.186693	1	2459	tags=21%, list=11%, signal=23%	NA
ROZANOV_MMP14_TARGETS_SUBSET	ROZANOV_MMP14_TARGETS_SUBSET		33	-0.444028	-1.33782	0.121368	0.186608	1	606	tags=12%, list=3%, signal=12%	NA
STAMBOLSKY_RESPONSE_TO_VITAMIN_D3_UP	STAMBOLSKY_RESPONSE_TO_VITAMIN_D3_UP		77	-0.37511	-1.33755	0.0861027	0.186676	1	4099	tags=35%, list=19%, signal=43%	NA
ZHANG_ANTIVIRAL_RESPONSE_TO_RIBAVIRIN_UP	ZHANG_ANTIVIRAL_RESPONSE_TO_RIBAVIRIN_UP		29	-0.453908	-1.33728	0.122924	0.186738	1	1543	tags=24%, list=7%, signal=26%	NA
MISHRA_CARCINOMA_ASSOCIATED_FIBROBLAST_UP	MISHRA_CARCINOMA_ASSOCIATED_FIBROBLAST_UP		24	-0.474692	-1.33721	0.115993	0.186613	1	904	tags=13%, list=4%, signal=13%	NA
NUYTTEN_NIPP1_TARGETS_DN	NUYTTEN_NIPP1_TARGETS_DN		821	-0.304217	-1.33656	0.00324324	0.187095	1	3234	tags=27%, list=15%, signal=31%	NA
PETROVA_ENDOTHELIUM_LYMPHATIC_VS_BLOOD_DN	PETROVA_ENDOTHELIUM_LYMPHATIC_VS_BLOOD_DN		159	-0.346518	-1.33578	0.0592194	0.187741	1	2311	tags=21%, list=11%, signal=23%	NA
MAGRANGEAS_MULTIPLE_MYELOMA_IGG_VS_IGA_DN	MAGRANGEAS_MULTIPLE_MYELOMA_IGG_VS_IGA_DN		25	-0.476904	-1.3353	0.133333	0.188047	1	1606	tags=24%, list=7%, signal=26%	NA
DACOSTA_LOW_DOSE_UV_RESPONSE_VIA_ERCC3_XPCS_UP	DACOSTA_LOW_DOSE_UV_RESPONSE_VIA_ERCC3_XPCS_UP		17	-0.51915	-1.33515	0.161228	0.18797	1	3512	tags=47%, list=16%, signal=56%	NA
WAKABAYASHI_ADIPOGENESIS_PPARG_RXRA_BOUND_8D	WAKABAYASHI_ADIPOGENESIS_PPARG_RXRA_BOUND_8D		843	-0.301586	-1.33377	0.00318134	0.189326	1	4144	tags=30%, list=19%, signal=36%	NA
WINNEPENNINCKX_MELANOMA_METASTASIS_DN	WINNEPENNINCKX_MELANOMA_METASTASIS_DN		41	-0.425957	-1.33358	0.122187	0.189331	1	276	tags=7%, list=1%, signal=7%	NA
BILD_HRAS_ONCOGENIC_SIGNATURE	BILD_HRAS_ONCOGENIC_SIGNATURE		250	-0.330924	-1.33322	0.0332481	0.189491	1	2815	tags=24%, list=13%, signal=28%	NA
MARKEY_RB1_CHRONIC_LOF_DN	MARKEY_RB1_CHRONIC_LOF_DN		115	-0.357542	-1.33315	0.0749646	0.189333	1	2478	tags=21%, list=11%, signal=23%	NA
BIDUS_METASTASIS_DN	BIDUS_METASTASIS_DN		150	-0.345325	-1.3331	0.0600559	0.189173	1	2387	tags=23%, list=11%, signal=26%	NA
MIKKELSEN_MEF_LCP_WITH_H3K4ME3	MIKKELSEN_MEF_LCP_WITH_H3K4ME3		124	-0.355343	-1.3328	0.0546218	0.189286	1	1088	tags=14%, list=5%, signal=14%	NA
ADDYA_ERYTHROID_DIFFERENTIATION_BY_HEMIN	ADDYA_ERYTHROID_DIFFERENTIATION_BY_HEMIN		72	-0.384096	-1.332	0.0948678	0.189932	1	1964	tags=28%, list=9%, signal=30%	NA
BOYLAN_MULTIPLE_MYELOMA_D_CLUSTER_UP	BOYLAN_MULTIPLE_MYELOMA_D_CLUSTER_UP		27	-0.457367	-1.33169	0.118299	0.19007	1	2449	tags=30%, list=11%, signal=33%	NA
LEE_LIVER_CANCER_DENA_DN	LEE_LIVER_CANCER_DENA_DN		73	-0.376963	-1.33167	0.0996979	0.189866	1	2733	tags=21%, list=13%, signal=23%	NA
HASLINGER_B_CLL_WITH_11Q23_DELETION	HASLINGER_B_CLL_WITH_11Q23_DELETION		23	-0.476529	-1.33159	0.123478	0.18973	1	3153	tags=48%, list=15%, signal=56%	NA
CHEN_LIVER_METABOLISM_QTL_CIS	CHEN_LIVER_METABOLISM_QTL_CIS		91	-0.378702	-1.33144	0.0855072	0.189686	1	3996	tags=34%, list=18%, signal=42%	NA
NAKAJIMA_EOSINOPHIL	NAKAJIMA_EOSINOPHIL		29	-0.459367	-1.33075	0.134948	0.190225	1	2574	tags=24%, list=12%, signal=27%	NA
CREIGHTON_ENDOCRINE_THERAPY_RESISTANCE_4	CREIGHTON_ENDOCRINE_THERAPY_RESISTANCE_4		283	-0.325004	-1.32993	0.0385093	0.190958	1	2770	tags=23%, list=13%, signal=26%	NA
MATZUK_SPERMATOGONIA	MATZUK_SPERMATOGONIA		24	-0.470525	-1.32963	0.133333	0.191065	1	2978	tags=25%, list=14%, signal=29%	NA
SAMOLS_TARGETS_OF_KHSV_MIRNAS_DN	SAMOLS_TARGETS_OF_KHSV_MIRNAS_DN		58	-0.397393	-1.32796	0.109375	0.192662	1	2740	tags=22%, list=13%, signal=26%	NA
KIM_MYC_AMPLIFICATION_TARGETS_DN	KIM_MYC_AMPLIFICATION_TARGETS_DN		91	-0.370709	-1.32582	0.0787037	0.194919	1	2162	tags=21%, list=10%, signal=23%	NA
LIAN_NEUTROPHIL_GRANULE_CONSTITUENTS	LIAN_NEUTROPHIL_GRANULE_CONSTITUENTS		24	-0.476265	-1.32567	0.137809	0.194863	1	1814	tags=42%, list=8%, signal=45%	NA
GUENTHER_GROWTH_SPHERICAL_VS_ADHERENT_DN	GUENTHER_GROWTH_SPHERICAL_VS_ADHERENT_DN		25	-0.472896	-1.3228	0.139084	0.197937	1	2261	tags=36%, list=10%, signal=40%	NA
KYNG_DNA_DAMAGE_BY_4NQO_OR_UV	KYNG_DNA_DAMAGE_BY_4NQO_OR_UV		63	-0.389771	-1.32259	0.11041	0.197963	1	3109	tags=29%, list=14%, signal=33%	NA
ZHANG_TLX_TARGETS_60HR_UP	ZHANG_TLX_TARGETS_60HR_UP		288	-0.319208	-1.32179	0.0318627	0.198648	1	3225	tags=25%, list=15%, signal=29%	NA
DAVICIONI_TARGETS_OF_PAX_FOXO1_FUSIONS_UP	DAVICIONI_TARGETS_OF_PAX_FOXO1_FUSIONS_UP		246	-0.325524	-1.32155	0.0375469	0.198688	1	2770	tags=22%, list=13%, signal=25%	NA
WEIGEL_OXIDATIVE_STRESS_BY_HNE_AND_TBH	WEIGEL_OXIDATIVE_STRESS_BY_HNE_AND_TBH		58	-0.398284	-1.32116	0.095679	0.198882	1	2360	tags=22%, list=11%, signal=25%	NA
HAN_JNK_SINGALING_UP	HAN_JNK_SINGALING_UP		35	-0.433233	-1.32051	0.114286	0.19942	1	1685	tags=23%, list=8%, signal=25%	NA
WIERENGA_STAT5A_TARGETS_DN	WIERENGA_STAT5A_TARGETS_DN		204	-0.329309	-1.32044	0.0498034	0.199276	1	2584	tags=22%, list=12%, signal=25%	NA
CORRE_MULTIPLE_MYELOMA_UP	CORRE_MULTIPLE_MYELOMA_UP		66	-0.387417	-1.32013	0.113565	0.199416	1	1925	tags=15%, list=9%, signal=17%	NA
LABBE_TARGETS_OF_TGFB1_AND_WNT3A_DN	LABBE_TARGETS_OF_TGFB1_AND_WNT3A_DN		106	-0.357051	-1.31999	0.0862801	0.199375	1	3533	tags=25%, list=16%, signal=29%	NA
NEWMAN_ERCC6_TARGETS_UP	NEWMAN_ERCC6_TARGETS_UP		23	-0.475464	-1.31976	0.157509	0.19943	1	2495	tags=35%, list=12%, signal=39%	NA
LANG_MYB_FAMILY_TARGETS	LANG_MYB_FAMILY_TARGETS		29	-0.446873	-1.31927	0.131206	0.199762	1	595	tags=21%, list=3%, signal=21%	NA
TURASHVILI_BREAST_CARCINOMA_DUCTAL_VS_LOBULAR_UP	TURASHVILI_BREAST_CARCINOMA_DUCTAL_VS_LOBULAR_UP		19	-0.486498	-1.31915	0.136602	0.199679	1	1624	tags=26%, list=7%, signal=28%	NA
BYSTRYKH_HEMATOPOIESIS_STEM_CELL_QTL_CIS	BYSTRYKH_HEMATOPOIESIS_STEM_CELL_QTL_CIS		114	-0.355017	-1.31912	0.0720461	0.199492	1	2644	tags=26%, list=12%, signal=30%	NA
ZHAN_VARIABLE_EARLY_DIFFERENTIATION_GENES_DN	ZHAN_VARIABLE_EARLY_DIFFERENTIATION_GENES_DN		30	-0.442967	-1.31808	0.144082	0.200488	1	3186	tags=40%, list=15%, signal=47%	NA
GAL_LEUKEMIC_STEM_CELL_DN	GAL_LEUKEMIC_STEM_CELL_DN		241	-0.323017	-1.31771	0.0400501	0.200696	1	780	tags=10%, list=4%, signal=10%	NA
YAO_TEMPORAL_RESPONSE_TO_PROGESTERONE_CLUSTER_12	YAO_TEMPORAL_RESPONSE_TO_PROGESTERONE_CLUSTER_12		78	-0.369543	-1.31755	0.0930233	0.200656	1	3132	tags=27%, list=14%, signal=31%	NA
PLASARI_TGFB1_TARGETS_10HR_UP	PLASARI_TGFB1_TARGETS_10HR_UP		197	-0.329778	-1.31719	0.0464807	0.200829	1	1760	tags=14%, list=8%, signal=15%	NA
YIH_RESPONSE_TO_ARSENITE_C1	YIH_RESPONSE_TO_ARSENITE_C1		23	-0.474571	-1.31665	0.13253	0.201239	1	3041	tags=39%, list=14%, signal=45%	NA
YAO_TEMPORAL_RESPONSE_TO_PROGESTERONE_CLUSTER_9	YAO_TEMPORAL_RESPONSE_TO_PROGESTERONE_CLUSTER_9		72	-0.384095	-1.3165	0.0971599	0.201199	1	2574	tags=26%, list=12%, signal=30%	NA
RODRIGUES_NTN1_AND_DCC_TARGETS	RODRIGUES_NTN1_AND_DCC_TARGETS		33	-0.436598	-1.31605	0.144279	0.201504	1	2162	tags=30%, list=10%, signal=34%	NA
BERNARD_PPAPDC1B_TARGETS_UP	BERNARD_PPAPDC1B_TARGETS_UP		36	-0.436853	-1.31303	0.135314	0.20482	1	4005	tags=50%, list=18%, signal=61%	NA
RAO_BOUND_BY_SALL4	RAO_BOUND_BY_SALL4		220	-0.326902	-1.31291	0.0414573	0.20474	1	3702	tags=29%, list=17%, signal=35%	NA
KIM_ALL_DISORDERS_CALB1_CORR_UP	KIM_ALL_DISORDERS_CALB1_CORR_UP		531	-0.301192	-1.31239	0.0145089	0.205145	1	3625	tags=25%, list=17%, signal=29%	NA
GRAESSMANN_RESPONSE_TO_MC_AND_DOXORUBICIN_UP	GRAESSMANN_RESPONSE_TO_MC_AND_DOXORUBICIN_UP		589	-0.30427	-1.31145	0.0154015	0.206054	1	2936	tags=20%, list=14%, signal=23%	NA
BREDEMEYER_RAG_SIGNALING_VIA_ATM_NOT_VIA_NFKB_DN	BREDEMEYER_RAG_SIGNALING_VIA_ATM_NOT_VIA_NFKB_DN		36	-0.438448	-1.31089	0.145396	0.206515	1	2754	tags=25%, list=13%, signal=29%	NA
LUI_THYROID_CANCER_PAX8_PPARG_UP	LUI_THYROID_CANCER_PAX8_PPARG_UP		44	-0.414019	-1.31084	0.147436	0.206335	1	4711	tags=41%, list=22%, signal=52%	NA
TONKS_TARGETS_OF_RUNX1_RUNX1T1_FUSION_SUSTAINED_IN_GRANULOCYTE_UP	TONKS_TARGETS_OF_RUNX1_RUNX1T1_FUSION_SUSTAINED_IN_GRANULOCYTE_UP		15	-0.52412	-1.30972	0.151119	0.2074	1	1703	tags=20%, list=8%, signal=22%	NA
YAGI_AML_WITH_T_9_11_TRANSLOCATION	YAGI_AML_WITH_T_9_11_TRANSLOCATION		128	-0.348543	-1.30953	0.0798859	0.207399	1	3216	tags=29%, list=15%, signal=34%	NA
NING_CHRONIC_OBSTRUCTIVE_PULMONARY_DISEASE_DN	NING_CHRONIC_OBSTRUCTIVE_PULMONARY_DISEASE_DN		119	-0.347785	-1.30953	0.0802721	0.207174	1	3209	tags=28%, list=15%, signal=32%	NA
GARGALOVIC_RESPONSE_TO_OXIDIZED_PHOSPHOLIPIDS_BLUE_DN	GARGALOVIC_RESPONSE_TO_OXIDIZED_PHOSPHOLIPIDS_BLUE_DN		57	-0.391845	-1.30906	0.110599	0.207487	1	3283	tags=30%, list=15%, signal=35%	NA
AMIT_SERUM_RESPONSE_240_MCF10A	AMIT_SERUM_RESPONSE_240_MCF10A		56	-0.393704	-1.30561	0.115987	0.211349	1	740	tags=13%, list=3%, signal=13%	NA
GAVIN_FOXP3_TARGETS_CLUSTER_P2	GAVIN_FOXP3_TARGETS_CLUSTER_P2		76	-0.375028	-1.30544	0.0993884	0.211304	1	2426	tags=26%, list=11%, signal=30%	NA
SHETH_LIVER_CANCER_VS_TXNIP_LOSS_PAM4	SHETH_LIVER_CANCER_VS_TXNIP_LOSS_PAM4		249	-0.321398	-1.30538	0.0369898	0.211137	1	1691	tags=11%, list=8%, signal=12%	NA
DELASERNA_MYOD_TARGETS_UP	DELASERNA_MYOD_TARGETS_UP		86	-0.36546	-1.30518	0.104566	0.211147	1	3306	tags=27%, list=15%, signal=31%	NA
KIM_LRRC3B_TARGETS	KIM_LRRC3B_TARGETS		28	-0.451511	-1.30448	0.146465	0.211746	1	3682	tags=46%, list=17%, signal=56%	NA
ROZANOV_MMP14_TARGETS_UP	ROZANOV_MMP14_TARGETS_UP		262	-0.32102	-1.30396	0.045045	0.212157	1	1771	tags=14%, list=8%, signal=15%	NA
TONKS_TARGETS_OF_RUNX1_RUNX1T1_FUSION_GRANULOCYTE_DN	TONKS_TARGETS_OF_RUNX1_RUNX1T1_FUSION_GRANULOCYTE_DN		17	-0.50663	-1.30348	0.166667	0.212481	1	57	tags=12%, list=0%, signal=12%	NA
YAO_TEMPORAL_RESPONSE_TO_PROGESTERONE_CLUSTER_1	YAO_TEMPORAL_RESPONSE_TO_PROGESTERONE_CLUSTER_1		67	-0.381801	-1.30332	0.118721	0.212482	1	2591	tags=27%, list=12%, signal=30%	NA
SHAFFER_IRF4_MULTIPLE_MYELOMA_PROGRAM	SHAFFER_IRF4_MULTIPLE_MYELOMA_PROGRAM		36	-0.428974	-1.3031	0.141176	0.212518	1	3480	tags=36%, list=16%, signal=43%	NA
SHEPARD_BMYB_MORPHOLINO_UP	SHEPARD_BMYB_MORPHOLINO_UP		203	-0.334649	-1.30269	0.0684755	0.212793	1	2813	tags=25%, list=13%, signal=28%	NA
ZHU_CMV_24_HR_DN	ZHU_CMV_24_HR_DN		89	-0.364302	-1.3017	0.114458	0.213711	1	2811	tags=26%, list=13%, signal=30%	NA
SEKI_INFLAMMATORY_RESPONSE_LPS_DN	SEKI_INFLAMMATORY_RESPONSE_LPS_DN		22	-0.473238	-1.30122	0.170175	0.214123	1	1533	tags=23%, list=7%, signal=24%	NA
LUI_THYROID_CANCER_CLUSTER_2	LUI_THYROID_CANCER_CLUSTER_2		41	-0.411698	-1.30101	0.128874	0.214135	1	3113	tags=24%, list=14%, signal=28%	NA
KYNG_DNA_DAMAGE_BY_4NQO	KYNG_DNA_DAMAGE_BY_4NQO		37	-0.422603	-1.30007	0.133779	0.215	1	97	tags=8%, list=0%, signal=8%	NA
VERRECCHIA_DELAYED_RESPONSE_TO_TGFB1	VERRECCHIA_DELAYED_RESPONSE_TO_TGFB1		39	-0.420121	-1.30003	0.106908	0.214812	1	1558	tags=15%, list=7%, signal=17%	NA
UDAYAKUMAR_MED1_TARGETS_UP	UDAYAKUMAR_MED1_TARGETS_UP		132	-0.344599	-1.29986	0.0881543	0.214778	1	2392	tags=27%, list=11%, signal=30%	NA
SCHAVOLT_TARGETS_OF_TP53_AND_TP63	SCHAVOLT_TARGETS_OF_TP53_AND_TP63		16	-0.508907	-1.29682	0.173993	0.21823	1	1517	tags=31%, list=7%, signal=34%	NA
REICHERT_MITOSIS_LIN9_TARGETS	REICHERT_MITOSIS_LIN9_TARGETS		28	-0.44171	-1.29661	0.156406	0.218302	1	2156	tags=32%, list=10%, signal=36%	NA
FONTAINE_FOLLICULAR_THYROID_ADENOMA_DN	FONTAINE_FOLLICULAR_THYROID_ADENOMA_DN		67	-0.378684	-1.29496	0.113497	0.22012	1	465	tags=7%, list=2%, signal=8%	NA
BENPORATH_OCT4_TARGETS	BENPORATH_OCT4_TARGETS		285	-0.31649	-1.29464	0.0428397	0.220283	1	2593	tags=19%, list=12%, signal=22%	NA
AMUNDSON_POOR_SURVIVAL_AFTER_GAMMA_RADIATION_2G	AMUNDSON_POOR_SURVIVAL_AFTER_GAMMA_RADIATION_2G		167	-0.334859	-1.29405	0.0774457	0.220758	1	1837	tags=22%, list=8%, signal=24%	NA
LABBE_WNT3A_TARGETS_UP	LABBE_WNT3A_TARGETS_UP		109	-0.34832	-1.29332	0.105036	0.221445	1	1122	tags=12%, list=5%, signal=13%	NA
STAMBOLSKY_TARGETS_OF_MUTATED_TP53_DN	STAMBOLSKY_TARGETS_OF_MUTATED_TP53_DN		45	-0.403348	-1.29281	0.14044	0.221868	1	2001	tags=24%, list=9%, signal=27%	NA
GU_PDEF_TARGETS_DN	GU_PDEF_TARGETS_DN		39	-0.415297	-1.2919	0.151463	0.222733	1	5345	tags=36%, list=25%, signal=48%	NA
MCCLUNG_DELTA_FOSB_TARGETS_8WK	MCCLUNG_DELTA_FOSB_TARGETS_8WK		47	-0.396575	-1.29181	0.138614	0.222604	1	3471	tags=26%, list=16%, signal=30%	NA
STAMBOLSKY_RESPONSE_TO_VITAMIN_D3_DN	STAMBOLSKY_RESPONSE_TO_VITAMIN_D3_DN		24	-0.466804	-1.29157	0.166667	0.22265	1	3051	tags=33%, list=14%, signal=39%	NA
CAIRO_HEPATOBLASTOMA_DN	CAIRO_HEPATOBLASTOMA_DN		260	-0.312285	-1.29101	0.0601023	0.22309	1	1724	tags=13%, list=8%, signal=14%	NA
GRABARCZYK_BCL11B_TARGETS_UP	GRABARCZYK_BCL11B_TARGETS_UP		73	-0.363825	-1.29082	0.117562	0.223078	1	2536	tags=36%, list=12%, signal=40%	NA
LIAN_LIPA_TARGETS_3M	LIAN_LIPA_TARGETS_3M		57	-0.393422	-1.28964	0.128247	0.224385	1	2547	tags=25%, list=12%, signal=28%	NA
BILBAN_B_CLL_LPL_UP	BILBAN_B_CLL_LPL_UP		61	-0.385151	-1.28922	0.137825	0.22468	1	2314	tags=26%, list=11%, signal=29%	NA
MIYAGAWA_TARGETS_OF_EWSR1_ETS_FUSIONS_DN	MIYAGAWA_TARGETS_OF_EWSR1_ETS_FUSIONS_DN		210	-0.320792	-1.28873	0.0689655	0.225095	1	1092	tags=11%, list=5%, signal=12%	NA
ZHAN_MULTIPLE_MYELOMA_LB_UP	ZHAN_MULTIPLE_MYELOMA_LB_UP		40	-0.415155	-1.28846	0.150943	0.225225	1	2822	tags=25%, list=13%, signal=29%	NA
WANG_RECURRENT_LIVER_CANCER_UP	WANG_RECURRENT_LIVER_CANCER_UP		20	-0.475493	-1.28758	0.169982	0.226123	1	5267	tags=55%, list=24%, signal=73%	NA
GENTILE_UV_RESPONSE_CLUSTER_D9	GENTILE_UV_RESPONSE_CLUSTER_D9		27	-0.456481	-1.2874	0.145051	0.226119	1	3862	tags=52%, list=18%, signal=63%	NA
BECKER_TAMOXIFEN_RESISTANCE_DN	BECKER_TAMOXIFEN_RESISTANCE_DN		51	-0.395098	-1.28607	0.15	0.22765	1	3109	tags=27%, list=14%, signal=32%	NA
WAKABAYASHI_ADIPOGENESIS_PPARG_RXRA_BOUND_36HR	WAKABAYASHI_ADIPOGENESIS_PPARG_RXRA_BOUND_36HR		148	-0.335122	-1.28551	0.0816327	0.228127	1	3559	tags=29%, list=16%, signal=35%	NA
LI_INDUCED_T_TO_NATURAL_KILLER_UP	LI_INDUCED_T_TO_NATURAL_KILLER_UP		297	-0.311349	-1.28543	0.050995	0.227976	1	1801	tags=18%, list=8%, signal=20%	NA
IGARASHI_ATF4_TARGETS_DN	IGARASHI_ATF4_TARGETS_DN		88	-0.362675	-1.28476	0.115269	0.228603	1	3953	tags=38%, list=18%, signal=46%	NA
EHRLICH_ICF_SYNDROM_DN	EHRLICH_ICF_SYNDROM_DN		15	-0.513259	-1.2844	0.174074	0.228862	1	1540	tags=33%, list=7%, signal=36%	NA
CHANGOLKAR_H2AFY_TARGETS_DN	CHANGOLKAR_H2AFY_TARGETS_DN		39	-0.407596	-1.28331	0.160131	0.230009	1	4150	tags=33%, list=19%, signal=41%	NA
BENPORATH_MYC_MAX_TARGETS	BENPORATH_MYC_MAX_TARGETS		763	-0.289865	-1.28243	0.0105708	0.2309	1	3904	tags=30%, list=18%, signal=35%	NA
INGRAM_SHH_TARGETS_UP	INGRAM_SHH_TARGETS_UP		122	-0.338517	-1.28238	0.0889526	0.230714	1	606	tags=11%, list=3%, signal=11%	NA
JECHLINGER_EPITHELIAL_TO_MESENCHYMAL_TRANSITION_UP	JECHLINGER_EPITHELIAL_TO_MESENCHYMAL_TRANSITION_UP		70	-0.371883	-1.28175	0.121439	0.2313	1	935	tags=16%, list=4%, signal=16%	NA
LANDIS_BREAST_CANCER_PROGRESSION_DN	LANDIS_BREAST_CANCER_PROGRESSION_DN		69	-0.371823	-1.2817	0.133835	0.231113	1	1691	tags=19%, list=8%, signal=20%	NA
KANG_DOXORUBICIN_RESISTANCE_DN	KANG_DOXORUBICIN_RESISTANCE_DN		18	-0.482868	-1.28021	0.172291	0.232783	1	2260	tags=44%, list=10%, signal=50%	NA
CHIARADONNA_NEOPLASTIC_TRANSFORMATION_KRAS_CDC25_UP	CHIARADONNA_NEOPLASTIC_TRANSFORMATION_KRAS_CDC25_UP		57	-0.386014	-1.28005	0.132399	0.23275	1	1178	tags=21%, list=5%, signal=22%	NA
NOJIMA_SFRP2_TARGETS_DN	NOJIMA_SFRP2_TARGETS_DN		24	-0.461186	-1.27858	0.17517	0.234419	1	1319	tags=21%, list=6%, signal=22%	NA
DUTERTRE_ESTRADIOL_RESPONSE_6HR_DN	DUTERTRE_ESTRADIOL_RESPONSE_6HR_DN		90	-0.360226	-1.27695	0.121805	0.236288	1	3975	tags=29%, list=18%, signal=35%	NA
MOREAUX_MULTIPLE_MYELOMA_BY_TACI_DN	MOREAUX_MULTIPLE_MYELOMA_BY_TACI_DN		164	-0.330005	-1.27664	0.0895722	0.236416	1	3642	tags=33%, list=17%, signal=39%	NA
LEE_AGING_CEREBELLUM_DN	LEE_AGING_CEREBELLUM_DN		83	-0.360864	-1.27658	0.114925	0.23626	1	621	tags=6%, list=3%, signal=6%	NA
BENPORATH_CYCLING_GENES	BENPORATH_CYCLING_GENES		632	-0.291968	-1.27644	0.0201342	0.236207	1	3273	tags=27%, list=15%, signal=31%	NA
GAZDA_DIAMOND_BLACKFAN_ANEMIA_PROGENITOR_UP	GAZDA_DIAMOND_BLACKFAN_ANEMIA_PROGENITOR_UP		39	-0.409213	-1.27612	0.165303	0.236396	1	4572	tags=46%, list=21%, signal=58%	NA
BOYAULT_LIVER_CANCER_SUBCLASS_G1_DN	BOYAULT_LIVER_CANCER_SUBCLASS_G1_DN		40	-0.400894	-1.27391	0.15949	0.239092	1	3168	tags=33%, list=15%, signal=38%	NA
OSWALD_HEMATOPOIETIC_STEM_CELL_IN_COLLAGEN_GEL_UP	OSWALD_HEMATOPOIETIC_STEM_CELL_IN_COLLAGEN_GEL_UP		226	-0.320049	-1.27332	0.0744544	0.239672	1	2564	tags=23%, list=12%, signal=26%	NA
DACOSTA_UV_RESPONSE_VIA_ERCC3_XPCS_UP	DACOSTA_UV_RESPONSE_VIA_ERCC3_XPCS_UP		28	-0.426514	-1.27328	0.169231	0.239493	1	1952	tags=25%, list=9%, signal=27%	NA
SCHAEFFER_PROSTATE_DEVELOPMENT_48HR_DN	SCHAEFFER_PROSTATE_DEVELOPMENT_48HR_DN		416	-0.298242	-1.27319	0.0381944	0.239365	1	2597	tags=16%, list=12%, signal=17%	NA
PEDERSEN_METASTASIS_BY_ERBB2_ISOFORM_7	PEDERSEN_METASTASIS_BY_ERBB2_ISOFORM_7		378	-0.302202	-1.27181	0.0418605	0.240934	1	2962	tags=22%, list=14%, signal=25%	NA
NAKAYAMA_SOFT_TISSUE_TUMORS_PCA2_DN	NAKAYAMA_SOFT_TISSUE_TUMORS_PCA2_DN		78	-0.361642	-1.27142	0.131298	0.241234	1	753	tags=9%, list=3%, signal=9%	NA
NGUYEN_NOTCH1_TARGETS_UP	NGUYEN_NOTCH1_TARGETS_UP		29	-0.430613	-1.27056	0.174359	0.242149	1	2198	tags=28%, list=10%, signal=31%	NA
BILBAN_B_CLL_LPL_DN	BILBAN_B_CLL_LPL_DN		41	-0.39775	-1.26843	0.14557	0.244761	1	2916	tags=37%, list=13%, signal=42%	NA
AMIT_EGF_RESPONSE_40_MCF10A	AMIT_EGF_RESPONSE_40_MCF10A		19	-0.467888	-1.26809	0.204013	0.244975	1	2512	tags=32%, list=12%, signal=36%	NA
TIEN_INTESTINE_PROBIOTICS_2HR_UP	TIEN_INTESTINE_PROBIOTICS_2HR_UP		27	-0.448027	-1.26742	0.170435	0.24565	1	1703	tags=15%, list=8%, signal=16%	NA
DITTMER_PTHLH_TARGETS_UP	DITTMER_PTHLH_TARGETS_UP		111	-0.345192	-1.26677	0.117302	0.246283	1	3211	tags=26%, list=15%, signal=31%	NA
MILI_PSEUDOPODIA_CHEMOTAXIS_DN	MILI_PSEUDOPODIA_CHEMOTAXIS_DN		439	-0.295507	-1.26646	0.0429234	0.246448	1	2822	tags=21%, list=13%, signal=24%	NA
VALK_AML_CLUSTER_15	VALK_AML_CLUSTER_15		31	-0.434134	-1.26618	0.173611	0.246575	1	869	tags=16%, list=4%, signal=17%	NA
GARCIA_TARGETS_OF_FLI1_AND_DAX1_UP	GARCIA_TARGETS_OF_FLI1_AND_DAX1_UP		55	-0.382066	-1.26613	0.145631	0.246408	1	3853	tags=40%, list=18%, signal=49%	NA
RAY_TUMORIGENESIS_BY_ERBB2_CDC25A_DN	RAY_TUMORIGENESIS_BY_ERBB2_CDC25A_DN		153	-0.333306	-1.26588	0.106412	0.246488	1	2314	tags=21%, list=11%, signal=23%	NA
BERENJENO_TRANSFORMED_BY_RHOA_UP	BERENJENO_TRANSFORMED_BY_RHOA_UP		525	-0.293191	-1.26529	0.0257848	0.247041	1	3095	tags=24%, list=14%, signal=27%	NA
WANG_METHYLATED_IN_BREAST_CANCER	WANG_METHYLATED_IN_BREAST_CANCER		35	-0.413488	-1.26518	0.185249	0.246952	1	1277	tags=17%, list=6%, signal=18%	NA
BHAT_ESR1_TARGETS_VIA_AKT1_DN	BHAT_ESR1_TARGETS_VIA_AKT1_DN		80	-0.35841	-1.26485	0.121622	0.247139	1	3492	tags=29%, list=16%, signal=34%	NA
GEORGANTAS_HSC_MARKERS	GEORGANTAS_HSC_MARKERS		67	-0.369178	-1.26462	0.1456	0.24719	1	2079	tags=24%, list=10%, signal=26%	NA
MITSIADES_RESPONSE_TO_APLIDIN_DN	MITSIADES_RESPONSE_TO_APLIDIN_DN		245	-0.311411	-1.26397	0.0709838	0.247794	1	3280	tags=30%, list=15%, signal=35%	NA
LEE_LIVER_CANCER_MYC_TGFA_UP	LEE_LIVER_CANCER_MYC_TGFA_UP		60	-0.372313	-1.26316	0.156006	0.24871	1	1540	tags=18%, list=7%, signal=20%	NA
WAKABAYASHI_ADIPOGENESIS_PPARG_BOUND_8D	WAKABAYASHI_ADIPOGENESIS_PPARG_BOUND_8D		640	-0.288408	-1.26275	0.0363436	0.248991	1	3198	tags=23%, list=15%, signal=27%	NA
FEVR_CTNNB1_TARGETS_UP	FEVR_CTNNB1_TARGETS_UP		656	-0.286016	-1.26218	0.0267857	0.24948	1	3746	tags=24%, list=17%, signal=28%	NA
LINDGREN_BLADDER_CANCER_CLUSTER_2A_DN	LINDGREN_BLADDER_CANCER_CLUSTER_2A_DN		136	-0.332528	-1.26209	0.0997191	0.249345	1	2507	tags=24%, list=12%, signal=27%	NA
LIU_VMYB_TARGETS_UP	LIU_VMYB_TARGETS_UP		119	-0.338698	-1.26109	0.116147	0.250487	1	2804	tags=30%, list=13%, signal=35%	NA
IKEDA_MIR30_TARGETS_DN	IKEDA_MIR30_TARGETS_DN		27	-0.442225	-1.26049	0.163732	0.251087	1	3445	tags=41%, list=16%, signal=48%	NA
RIGGINS_TAMOXIFEN_RESISTANCE_UP	RIGGINS_TAMOXIFEN_RESISTANCE_UP		65	-0.371138	-1.26032	0.15	0.251076	1	383	tags=8%, list=2%, signal=8%	NA
RUTELLA_RESPONSE_TO_CSF2RB_AND_IL4_UP	RUTELLA_RESPONSE_TO_CSF2RB_AND_IL4_UP		329	-0.301602	-1.26023	0.0521739	0.250946	1	1797	tags=16%, list=8%, signal=18%	NA
OLSSON_E2F3_TARGETS_UP	OLSSON_E2F3_TARGETS_UP		28	-0.438315	-1.25961	0.19258	0.251509	1	3684	tags=43%, list=17%, signal=52%	NA
MCBRYAN_PUBERTAL_BREAST_5_6WK_DN	MCBRYAN_PUBERTAL_BREAST_5_6WK_DN		133	-0.329248	-1.25939	0.107924	0.251571	1	3241	tags=27%, list=15%, signal=32%	NA
ZHU_CMV_ALL_UP	ZHU_CMV_ALL_UP		120	-0.334063	-1.25931	0.121622	0.251441	1	3429	tags=31%, list=16%, signal=36%	NA
HELLER_HDAC_TARGETS_UP	HELLER_HDAC_TARGETS_UP		302	-0.302156	-1.2581	0.0574572	0.252853	1	2953	tags=21%, list=14%, signal=24%	NA
DAUER_STAT3_TARGETS_DN	DAUER_STAT3_TARGETS_DN		50	-0.386389	-1.25781	0.1563	0.252998	1	2476	tags=30%, list=11%, signal=34%	NA
HERNANDEZ_MITOTIC_ARREST_BY_DOCETAXEL_1_UP	HERNANDEZ_MITOTIC_ARREST_BY_DOCETAXEL_1_UP		35	-0.409839	-1.25755	0.184765	0.25312	1	3228	tags=29%, list=15%, signal=34%	NA
WU_CELL_MIGRATION	WU_CELL_MIGRATION		180	-0.320273	-1.25688	0.0947226	0.253808	1	1292	tags=13%, list=6%, signal=14%	NA
PELLICCIOTTA_HDAC_IN_ANTIGEN_PRESENTATION_DN	PELLICCIOTTA_HDAC_IN_ANTIGEN_PRESENTATION_DN		48	-0.392885	-1.25567	0.167742	0.255306	1	4790	tags=46%, list=22%, signal=59%	NA
MARTIN_INTERACT_WITH_HDAC	MARTIN_INTERACT_WITH_HDAC		44	-0.390957	-1.25531	0.15807	0.255584	1	2642	tags=32%, list=12%, signal=36%	NA
NIKOLSKY_BREAST_CANCER_12Q13_Q21_AMPLICON	NIKOLSKY_BREAST_CANCER_12Q13_Q21_AMPLICON		45	-0.394061	-1.2542	0.168852	0.256874	1	3536	tags=29%, list=16%, signal=34%	NA
LEE_CALORIE_RESTRICTION_NEOCORTEX_DN	LEE_CALORIE_RESTRICTION_NEOCORTEX_DN		87	-0.3488	-1.25318	0.142438	0.258078	1	4261	tags=26%, list=20%, signal=33%	NA
CHEMNITZ_RESPONSE_TO_PROSTAGLANDIN_E2_DN	CHEMNITZ_RESPONSE_TO_PROSTAGLANDIN_E2_DN		352	-0.295771	-1.25237	0.0627219	0.258954	1	2923	tags=20%, list=13%, signal=23%	NA
LENAOUR_DENDRITIC_CELL_MATURATION_UP	LENAOUR_DENDRITIC_CELL_MATURATION_UP		113	-0.338935	-1.25202	0.136236	0.259145	1	2371	tags=20%, list=11%, signal=23%	NA
TAKEDA_TARGETS_OF_NUP98_HOXA9_FUSION_6HR_DN	TAKEDA_TARGETS_OF_NUP98_HOXA9_FUSION_6HR_DN		39	-0.39547	-1.25099	0.166129	0.260335	1	1584	tags=18%, list=7%, signal=19%	NA
GAVIN_FOXP3_TARGETS_CLUSTER_P4	GAVIN_FOXP3_TARGETS_CLUSTER_P4		99	-0.341713	-1.25076	0.127095	0.260388	1	2241	tags=19%, list=10%, signal=21%	NA
KIM_WT1_TARGETS_8HR_UP	KIM_WT1_TARGETS_8HR_UP		162	-0.323926	-1.25048	0.105834	0.260556	1	2374	tags=21%, list=11%, signal=23%	NA
WALLACE_PROSTATE_CANCER_RACE_DN	WALLACE_PROSTATE_CANCER_RACE_DN		77	-0.357494	-1.24996	0.141123	0.26106	1	4571	tags=42%, list=21%, signal=52%	NA
DASU_IL6_SIGNALING_UP	DASU_IL6_SIGNALING_UP		59	-0.368893	-1.24972	0.16311	0.26112	1	1118	tags=19%, list=5%, signal=20%	NA
GRUETZMANN_PANCREATIC_CANCER_DN	GRUETZMANN_PANCREATIC_CANCER_DN		199	-0.315447	-1.24949	0.0966495	0.26117	1	2733	tags=22%, list=13%, signal=25%	NA
WAMUNYOKOLI_OVARIAN_CANCER_GRADES_1_2_UP	WAMUNYOKOLI_OVARIAN_CANCER_GRADES_1_2_UP		134	-0.328404	-1.24843	0.116379	0.262507	1	2725	tags=22%, list=13%, signal=25%	NA
BOCHKIS_FOXA2_TARGETS	BOCHKIS_FOXA2_TARGETS		414	-0.293959	-1.24804	0.0561404	0.262764	1	3219	tags=21%, list=15%, signal=24%	NA
YAO_TEMPORAL_RESPONSE_TO_PROGESTERONE_CLUSTER_3	YAO_TEMPORAL_RESPONSE_TO_PROGESTERONE_CLUSTER_3		15	-0.499757	-1.24788	0.207815	0.262725	1	1199	tags=27%, list=6%, signal=28%	NA
CUI_GLUCOSE_DEPRIVATION	CUI_GLUCOSE_DEPRIVATION		60	-0.372458	-1.2467	0.147287	0.264128	1	2217	tags=25%, list=10%, signal=28%	NA
AZARE_NEOPLASTIC_TRANSFORMATION_BY_STAT3_DN	AZARE_NEOPLASTIC_TRANSFORMATION_BY_STAT3_DN		16	-0.483031	-1.24584	0.232601	0.265169	1	306	tags=19%, list=1%, signal=19%	NA
VILIMAS_NOTCH1_TARGETS_DN	VILIMAS_NOTCH1_TARGETS_DN		19	-0.463197	-1.24575	0.209507	0.265037	1	431	tags=16%, list=2%, signal=16%	NA
XU_HGF_SIGNALING_NOT_VIA_AKT1_48HR_DN	XU_HGF_SIGNALING_NOT_VIA_AKT1_48HR_DN		20	-0.469886	-1.24569	0.195122	0.264853	1	4232	tags=50%, list=20%, signal=62%	NA
BURTON_ADIPOGENESIS_PEAK_AT_0HR	BURTON_ADIPOGENESIS_PEAK_AT_0HR		62	-0.368973	-1.24484	0.159265	0.265791	1	2228	tags=23%, list=10%, signal=25%	NA
TRACEY_RESISTANCE_TO_IFNA2_DN	TRACEY_RESISTANCE_TO_IFNA2_DN		30	-0.428867	-1.24398	0.195341	0.266724	1	1163	tags=20%, list=5%, signal=21%	NA
WORSCHECH_TUMOR_EVASION_AND_TOLEROGENICITY_UP	WORSCHECH_TUMOR_EVASION_AND_TOLEROGENICITY_UP		30	-0.427192	-1.24382	0.174061	0.266695	1	172	tags=7%, list=1%, signal=7%	NA
CHANGOLKAR_H2AFY_TARGETS_UP	CHANGOLKAR_H2AFY_TARGETS_UP		47	-0.392043	-1.24351	0.148208	0.266925	1	1574	tags=21%, list=7%, signal=23%	NA
BROWNE_HCMV_INFECTION_24HR_DN	BROWNE_HCMV_INFECTION_24HR_DN		147	-0.323843	-1.24335	0.10069	0.26687	1	2453	tags=20%, list=11%, signal=22%	NA
BONOME_OVARIAN_CANCER_SURVIVAL_OPTIMAL_DEBULKING	BONOME_OVARIAN_CANCER_SURVIVAL_OPTIMAL_DEBULKING		230	-0.307819	-1.243	0.0898876	0.267108	1	2998	tags=21%, list=14%, signal=24%	NA
ZWANG_DOWN_BY_2ND_EGF_PULSE	ZWANG_DOWN_BY_2ND_EGF_PULSE		244	-0.307791	-1.24156	0.0858258	0.268887	1	4093	tags=27%, list=19%, signal=33%	NA
BROWNE_HCMV_INFECTION_2HR_DN	BROWNE_HCMV_INFECTION_2HR_DN		49	-0.387732	-1.2414	0.173486	0.26887	1	777	tags=10%, list=4%, signal=11%	NA
PANGAS_TUMOR_SUPPRESSION_BY_SMAD1_AND_SMAD5_DN	PANGAS_TUMOR_SUPPRESSION_BY_SMAD1_AND_SMAD5_DN		150	-0.325566	-1.24128	0.111878	0.268779	1	2773	tags=20%, list=13%, signal=23%	NA
GUTIERREZ_MULTIPLE_MYELOMA_UP	GUTIERREZ_MULTIPLE_MYELOMA_UP		33	-0.419294	-1.24059	0.169748	0.2695	1	3406	tags=30%, list=16%, signal=36%	NA
LIN_NPAS4_TARGETS_UP	LIN_NPAS4_TARGETS_UP		154	-0.32038	-1.24029	0.115942	0.269669	1	3960	tags=32%, list=18%, signal=39%	NA
KYNG_NORMAL_AGING_UP	KYNG_NORMAL_AGING_UP		17	-0.481691	-1.24003	0.218644	0.269768	1	2821	tags=41%, list=13%, signal=47%	NA
RICKMAN_TUMOR_DIFFERENTIATED_WELL_VS_POORLY_UP	RICKMAN_TUMOR_DIFFERENTIATED_WELL_VS_POORLY_UP		227	-0.310386	-1.23991	0.111834	0.269704	1	2812	tags=23%, list=13%, signal=27%	NA
HARRIS_HYPOXIA	HARRIS_HYPOXIA		80	-0.34907	-1.23946	0.163142	0.270064	1	2983	tags=23%, list=14%, signal=26%	NA
ROLEF_GLIS3_TARGETS	ROLEF_GLIS3_TARGETS		37	-0.413524	-1.23923	0.192708	0.270141	1	1717	tags=8%, list=8%, signal=9%	NA
LIN_SILENCED_BY_TUMOR_MICROENVIRONMENT	LIN_SILENCED_BY_TUMOR_MICROENVIRONMENT		105	-0.335117	-1.23912	0.141618	0.270031	1	2675	tags=14%, list=12%, signal=16%	NA
BACOLOD_RESISTANCE_TO_ALKYLATING_AGENTS_DN	BACOLOD_RESISTANCE_TO_ALKYLATING_AGENTS_DN		57	-0.371951	-1.23893	0.171472	0.27006	1	3448	tags=30%, list=16%, signal=35%	NA
MILI_PSEUDOPODIA_HAPTOTAXIS_DN	MILI_PSEUDOPODIA_HAPTOTAXIS_DN		644	-0.282196	-1.23888	0.0361842	0.269863	1	2984	tags=21%, list=14%, signal=24%	NA
BOYLAN_MULTIPLE_MYELOMA_PCA1_UP	BOYLAN_MULTIPLE_MYELOMA_PCA1_UP		99	-0.341384	-1.23872	0.131343	0.269859	1	1005	tags=14%, list=5%, signal=15%	NA
WIKMAN_ASBESTOS_LUNG_CANCER_DN	WIKMAN_ASBESTOS_LUNG_CANCER_DN		26	-0.437016	-1.23849	0.219081	0.269937	1	2440	tags=27%, list=11%, signal=30%	NA
ONO_AML1_TARGETS_UP	ONO_AML1_TARGETS_UP		24	-0.441718	-1.23825	0.200351	0.270048	1	601	tags=8%, list=3%, signal=9%	NA
ZHAN_MULTIPLE_MYELOMA_CD1_AND_CD2_DN	ZHAN_MULTIPLE_MYELOMA_CD1_AND_CD2_DN		48	-0.382127	-1.23724	0.177814	0.271255	1	3350	tags=33%, list=15%, signal=39%	NA
YAMASHITA_LIVER_CANCER_STEM_CELL_DN	YAMASHITA_LIVER_CANCER_STEM_CELL_DN		76	-0.356243	-1.23696	0.166415	0.271402	1	2223	tags=14%, list=10%, signal=16%	NA
ZHU_CMV_ALL_DN	ZHU_CMV_ALL_DN		126	-0.32962	-1.23654	0.119658	0.271789	1	2811	tags=24%, list=13%, signal=27%	NA
TAKADA_GASTRIC_CANCER_COPY_NUMBER_DN	TAKADA_GASTRIC_CANCER_COPY_NUMBER_DN		29	-0.416685	-1.23621	0.192378	0.272014	1	1207	tags=14%, list=6%, signal=15%	NA
BURTON_ADIPOGENESIS_PEAK_AT_8HR	BURTON_ADIPOGENESIS_PEAK_AT_8HR		39	-0.403012	-1.23569	0.182258	0.272509	1	3200	tags=36%, list=15%, signal=42%	NA
TOOKER_GEMCITABINE_RESISTANCE_UP	TOOKER_GEMCITABINE_RESISTANCE_UP		76	-0.359459	-1.23454	0.167164	0.273942	1	2624	tags=25%, list=12%, signal=28%	NA
BORCZUK_MALIGNANT_MESOTHELIOMA_UP	BORCZUK_MALIGNANT_MESOTHELIOMA_UP		297	-0.296042	-1.23446	0.0821918	0.273827	1	3580	tags=31%, list=17%, signal=37%	NA
GRANDVAUX_IRF3_TARGETS_UP	GRANDVAUX_IRF3_TARGETS_UP		15	-0.491027	-1.23425	0.231034	0.273888	1	2314	tags=27%, list=11%, signal=30%	NA
SHETH_LIVER_CANCER_VS_TXNIP_LOSS_PAM2	SHETH_LIVER_CANCER_VS_TXNIP_LOSS_PAM2		148	-0.321496	-1.23372	0.11612	0.274412	1	2482	tags=22%, list=11%, signal=24%	NA
HU_GENOTOXIN_ACTION_DIRECT_VS_INDIRECT_4HR	HU_GENOTOXIN_ACTION_DIRECT_VS_INDIRECT_4HR		35	-0.408106	-1.23107	0.214041	0.278136	1	3170	tags=29%, list=15%, signal=33%	NA
APPIERTO_RESPONSE_TO_FENRETINIDE_UP	APPIERTO_RESPONSE_TO_FENRETINIDE_UP		38	-0.402154	-1.22851	0.198697	0.281639	1	2024	tags=21%, list=9%, signal=23%	NA
ROZANOV_MMP14_TARGETS_DN	ROZANOV_MMP14_TARGETS_DN		34	-0.411606	-1.22846	0.19598	0.281463	1	2138	tags=21%, list=10%, signal=23%	NA
NING_CHRONIC_OBSTRUCTIVE_PULMONARY_DISEASE_UP	NING_CHRONIC_OBSTRUCTIVE_PULMONARY_DISEASE_UP		154	-0.318245	-1.22824	0.135546	0.281513	1	3358	tags=23%, list=16%, signal=27%	NA
TAKEDA_TARGETS_OF_NUP98_HOXA9_FUSION_6HR_UP	TAKEDA_TARGETS_OF_NUP98_HOXA9_FUSION_6HR_UP		82	-0.348816	-1.22756	0.157815	0.282245	1	2879	tags=26%, list=13%, signal=29%	NA
WHITFIELD_CELL_CYCLE_M_G1	WHITFIELD_CELL_CYCLE_M_G1		139	-0.320779	-1.2271	0.134163	0.282682	1	3234	tags=31%, list=15%, signal=36%	NA
DORN_ADENOVIRUS_INFECTION_12HR_DN	DORN_ADENOVIRUS_INFECTION_12HR_DN		33	-0.409314	-1.22684	0.200704	0.282811	1	1268	tags=24%, list=6%, signal=26%	NA
GENTILE_UV_RESPONSE_CLUSTER_D6	GENTILE_UV_RESPONSE_CLUSTER_D6		35	-0.405412	-1.2267	0.19105	0.282771	1	3701	tags=43%, list=17%, signal=52%	NA
JEON_SMAD6_TARGETS_UP	JEON_SMAD6_TARGETS_UP		24	-0.440892	-1.22638	0.2038	0.283018	1	966	tags=17%, list=4%, signal=17%	NA
ABE_VEGFA_TARGETS_30MIN	ABE_VEGFA_TARGETS_30MIN		28	-0.438642	-1.2256	0.205433	0.283913	1	568	tags=11%, list=3%, signal=11%	NA
LINDGREN_BLADDER_CANCER_CLUSTER_1_UP	LINDGREN_BLADDER_CANCER_CLUSTER_1_UP		110	-0.332974	-1.22494	0.139403	0.284668	1	3674	tags=34%, list=17%, signal=40%	NA
MCBRYAN_PUBERTAL_BREAST_4_5WK_UP	MCBRYAN_PUBERTAL_BREAST_4_5WK_UP		267	-0.302066	-1.22456	0.0700876	0.284987	1	1749	tags=10%, list=8%, signal=11%	NA
MARTORIATI_MDM4_TARGETS_NEUROEPITHELIUM_DN	MARTORIATI_MDM4_TARGETS_NEUROEPITHELIUM_DN		155	-0.318458	-1.22179	0.122973	0.288943	1	3534	tags=21%, list=16%, signal=25%	NA
BYSTRYKH_HEMATOPOIESIS_STEM_CELL_QTL_TRANS	BYSTRYKH_HEMATOPOIESIS_STEM_CELL_QTL_TRANS		862	-0.275614	-1.22158	0.030623	0.288963	1	3337	tags=22%, list=15%, signal=25%	NA
KANNAN_TP53_TARGETS_UP	KANNAN_TP53_TARGETS_UP		58	-0.36659	-1.2205	0.180645	0.290376	1	2652	tags=26%, list=12%, signal=29%	NA
TONKS_TARGETS_OF_RUNX1_RUNX1T1_FUSION_GRANULOCYTE_UP	TONKS_TARGETS_OF_RUNX1_RUNX1T1_FUSION_GRANULOCYTE_UP		54	-0.367676	-1.22003	0.172628	0.290857	1	1749	tags=19%, list=8%, signal=20%	NA
GAZDA_DIAMOND_BLACKFAN_ANEMIA_ERYTHROID_UP	GAZDA_DIAMOND_BLACKFAN_ANEMIA_ERYTHROID_UP		24	-0.429779	-1.21978	0.229537	0.290955	1	2132	tags=25%, list=10%, signal=28%	NA
LEE_EARLY_T_LYMPHOCYTE_DN	LEE_EARLY_T_LYMPHOCYTE_DN		54	-0.365543	-1.21971	0.182692	0.290781	1	2103	tags=24%, list=10%, signal=27%	NA
GOLUB_ALL_VS_AML_UP	GOLUB_ALL_VS_AML_UP		24	-0.440189	-1.21949	0.206835	0.290855	1	1837	tags=33%, list=8%, signal=36%	NA
BRUINS_UVC_RESPONSE_VIA_TP53_GROUP_A	BRUINS_UVC_RESPONSE_VIA_TP53_GROUP_A		849	-0.276326	-1.21878	0.0286624	0.291695	1	2528	tags=14%, list=12%, signal=15%	NA
BREUHAHN_GROWTH_FACTOR_SIGNALING_IN_LIVER_CANCER	BREUHAHN_GROWTH_FACTOR_SIGNALING_IN_LIVER_CANCER		22	-0.446638	-1.218	0.222417	0.29261	1	6074	tags=64%, list=28%, signal=88%	NA
NAGASHIMA_NRG1_SIGNALING_UP	NAGASHIMA_NRG1_SIGNALING_UP		173	-0.309519	-1.21734	0.122973	0.293414	1	2910	tags=25%, list=13%, signal=28%	NA
VALK_AML_WITH_FLT3_ITD	VALK_AML_WITH_FLT3_ITD		37	-0.398619	-1.21727	0.190164	0.293252	1	2878	tags=35%, list=13%, signal=40%	NA
MATSUDA_NATURAL_KILLER_DIFFERENTIATION	MATSUDA_NATURAL_KILLER_DIFFERENTIATION		465	-0.283798	-1.21725	0.0727483	0.293008	1	2358	tags=16%, list=11%, signal=17%	NA
IVANOVA_HEMATOPOIESIS_STEM_CELL_LONG_TERM	IVANOVA_HEMATOPOIESIS_STEM_CELL_LONG_TERM		298	-0.293497	-1.21704	0.0977995	0.293084	1	4342	tags=28%, list=20%, signal=34%	NA
MULLIGHAN_NPM1_MUTATED_SIGNATURE_2_UP	MULLIGHAN_NPM1_MUTATED_SIGNATURE_2_UP		131	-0.321388	-1.21656	0.146893	0.293536	1	3111	tags=30%, list=14%, signal=35%	NA
GENTILE_UV_LOW_DOSE_DN	GENTILE_UV_LOW_DOSE_DN		66	-0.356493	-1.21653	0.196172	0.293295	1	2469	tags=24%, list=11%, signal=27%	NA
YAGI_AML_WITH_T_8_21_TRANSLOCATION	YAGI_AML_WITH_T_8_21_TRANSLOCATION		357	-0.289347	-1.21613	0.0824373	0.293677	1	3178	tags=25%, list=15%, signal=28%	NA
BEGUM_TARGETS_OF_PAX3_FOXO1_FUSION_UP	BEGUM_TARGETS_OF_PAX3_FOXO1_FUSION_UP		60	-0.363872	-1.21521	0.177542	0.294837	1	1790	tags=15%, list=8%, signal=16%	NA
ZHU_CMV_24_HR_UP	ZHU_CMV_24_HR_UP		93	-0.338975	-1.21457	0.191679	0.295591	1	3429	tags=34%, list=16%, signal=41%	NA
FEVR_CTNNB1_TARGETS_DN	FEVR_CTNNB1_TARGETS_DN		542	-0.281829	-1.21409	0.0459641	0.296097	1	3155	tags=25%, list=15%, signal=28%	NA
WANG_CLIM2_TARGETS_UP	WANG_CLIM2_TARGETS_UP		230	-0.298461	-1.21324	0.118863	0.297189	1	2490	tags=19%, list=11%, signal=21%	NA
KUMAR_TARGETS_OF_MLL_AF9_FUSION	KUMAR_TARGETS_OF_MLL_AF9_FUSION		389	-0.285834	-1.21323	0.0824499	0.29694	1	2627	tags=20%, list=12%, signal=22%	NA
GOBERT_CORE_OLIGODENDROCYTE_DIFFERENTIATION	GOBERT_CORE_OLIGODENDROCYTE_DIFFERENTIATION		40	-0.39209	-1.21281	0.20712	0.297294	1	1881	tags=23%, list=9%, signal=25%	NA
RICKMAN_TUMOR_DIFFERENTIATED_MODERATELY_VS_POORLY_UP	RICKMAN_TUMOR_DIFFERENTIATED_MODERATELY_VS_POORLY_UP		117	-0.3249	-1.21179	0.136812	0.298645	1	3905	tags=33%, list=18%, signal=40%	NA
BROWNE_HCMV_INFECTION_48HR_UP	BROWNE_HCMV_INFECTION_48HR_UP		177	-0.307302	-1.21155	0.146006	0.298767	1	3605	tags=29%, list=17%, signal=35%	NA
KIM_HYPOXIA	KIM_HYPOXIA		25	-0.430737	-1.21096	0.20979	0.299439	1	502	tags=20%, list=2%, signal=20%	NA
CHEN_LVAD_SUPPORT_OF_FAILING_HEART_DN	CHEN_LVAD_SUPPORT_OF_FAILING_HEART_DN		42	-0.382917	-1.21055	0.202303	0.299826	1	703	tags=17%, list=3%, signal=17%	NA
HORIUCHI_WTAP_TARGETS_DN	HORIUCHI_WTAP_TARGETS_DN		294	-0.293293	-1.21042	0.102469	0.299751	1	3619	tags=29%, list=17%, signal=34%	NA
GU_PDEF_TARGETS_UP	GU_PDEF_TARGETS_UP		71	-0.350021	-1.21029	0.187017	0.299708	1	2207	tags=21%, list=10%, signal=23%	NA
BIDUS_METASTASIS_UP	BIDUS_METASTASIS_UP		211	-0.3045	-1.21018	0.1181	0.299579	1	4264	tags=36%, list=20%, signal=44%	NA
SCHUETZ_BREAST_CANCER_DUCTAL_INVASIVE_DN	SCHUETZ_BREAST_CANCER_DUCTAL_INVASIVE_DN		83	-0.348942	-1.20847	0.185907	0.301997	1	2513	tags=22%, list=12%, signal=24%	NA
LIAN_LIPA_TARGETS_6M	LIAN_LIPA_TARGETS_6M		72	-0.348857	-1.20847	0.179941	0.301731	1	1815	tags=18%, list=8%, signal=20%	NA
ACOSTA_PROLIFERATION_INDEPENDENT_MYC_TARGETS_DN	ACOSTA_PROLIFERATION_INDEPENDENT_MYC_TARGETS_DN		112	-0.327315	-1.208	0.177584	0.302238	1	3065	tags=25%, list=14%, signal=29%	NA
ZHOU_INFLAMMATORY_RESPONSE_LIVE_UP	ZHOU_INFLAMMATORY_RESPONSE_LIVE_UP		435	-0.282378	-1.20795	0.0825581	0.302048	1	2487	tags=16%, list=11%, signal=17%	NA
KYNG_RESPONSE_TO_H2O2_VIA_ERCC6_UP	KYNG_RESPONSE_TO_H2O2_VIA_ERCC6_UP		40	-0.384171	-1.20792	0.212025	0.301807	1	3298	tags=30%, list=15%, signal=35%	NA
GRAHAM_CML_QUIESCENT_VS_NORMAL_QUIESCENT_UP	GRAHAM_CML_QUIESCENT_VS_NORMAL_QUIESCENT_UP		84	-0.339879	-1.20788	0.187404	0.301581	1	1084	tags=13%, list=5%, signal=14%	NA
ZHANG_RESPONSE_TO_CANTHARIDIN_UP	ZHANG_RESPONSE_TO_CANTHARIDIN_UP		19	-0.468017	-1.2078	0.236332	0.301437	1	3599	tags=42%, list=17%, signal=50%	NA
SHETH_LIVER_CANCER_VS_TXNIP_LOSS_PAM1	SHETH_LIVER_CANCER_VS_TXNIP_LOSS_PAM1		226	-0.300375	-1.20669	0.132986	0.30298	1	3474	tags=23%, list=16%, signal=28%	NA
SHIN_B_CELL_LYMPHOMA_CLUSTER_2	SHIN_B_CELL_LYMPHOMA_CLUSTER_2		30	-0.415594	-1.20627	0.236332	0.303342	1	2326	tags=30%, list=11%, signal=34%	NA
VERRECCHIA_RESPONSE_TO_TGFB1_C1	VERRECCHIA_RESPONSE_TO_TGFB1_C1		19	-0.464444	-1.20605	0.246801	0.303358	1	790	tags=21%, list=4%, signal=22%	NA
SHI_SPARC_TARGETS_UP	SHI_SPARC_TARGETS_UP		24	-0.434078	-1.20562	0.254902	0.303833	1	3458	tags=29%, list=16%, signal=35%	NA
KASLER_HDAC7_TARGETS_1_DN	KASLER_HDAC7_TARGETS_1_DN		17	-0.46172	-1.20559	0.247788	0.303609	1	660	tags=24%, list=3%, signal=24%	NA
TAVOR_CEBPA_TARGETS_DN	TAVOR_CEBPA_TARGETS_DN		29	-0.417369	-1.20541	0.252542	0.303625	1	742	tags=17%, list=3%, signal=18%	NA
ZHAN_EARLY_DIFFERENTIATION_GENES_DN	ZHAN_EARLY_DIFFERENTIATION_GENES_DN		42	-0.378236	-1.20535	0.214634	0.303446	1	2565	tags=29%, list=12%, signal=32%	NA
MARSON_FOXP3_TARGETS_STIMULATED_UP	MARSON_FOXP3_TARGETS_STIMULATED_UP		29	-0.409938	-1.20431	0.222798	0.30477	1	941	tags=21%, list=4%, signal=22%	NA
VILIMAS_NOTCH1_TARGETS_UP	VILIMAS_NOTCH1_TARGETS_UP		51	-0.368132	-1.20371	0.20122	0.305452	1	314	tags=8%, list=1%, signal=8%	NA
LINDGREN_BLADDER_CANCER_CLUSTER_3_DN	LINDGREN_BLADDER_CANCER_CLUSTER_3_DN		219	-0.298312	-1.20368	0.123596	0.305228	1	3691	tags=27%, list=17%, signal=32%	NA
GARGALOVIC_RESPONSE_TO_OXIDIZED_PHOSPHOLIPIDS_YELLOW_UP	GARGALOVIC_RESPONSE_TO_OXIDIZED_PHOSPHOLIPIDS_YELLOW_UP		31	-0.408889	-1.20197	0.223906	0.307652	1	3054	tags=45%, list=14%, signal=53%	NA
CHEBOTAEV_GR_TARGETS_UP	CHEBOTAEV_GR_TARGETS_UP		74	-0.344649	-1.20171	0.19062	0.307825	1	1660	tags=16%, list=8%, signal=18%	NA
TSUNODA_CISPLATIN_RESISTANCE_DN	TSUNODA_CISPLATIN_RESISTANCE_DN		49	-0.36644	-1.20115	0.193396	0.30846	1	777	tags=14%, list=4%, signal=15%	NA
FLECHNER_PBL_KIDNEY_TRANSPLANT_REJECTED_VS_OK_DN	FLECHNER_PBL_KIDNEY_TRANSPLANT_REJECTED_VS_OK_DN		51	-0.372878	-1.20049	0.188768	0.309301	1	2468	tags=27%, list=11%, signal=31%	NA
RIZ_ERYTHROID_DIFFERENTIATION_APOBEC2	RIZ_ERYTHROID_DIFFERENTIATION_APOBEC2		25	-0.421933	-1.20012	0.197232	0.309621	1	885	tags=12%, list=4%, signal=12%	NA
SASSON_RESPONSE_TO_FORSKOLIN_UP	SASSON_RESPONSE_TO_FORSKOLIN_UP		90	-0.330046	-1.19952	0.181818	0.310242	1	3216	tags=32%, list=15%, signal=38%	NA
LEIN_ASTROCYTE_MARKERS	LEIN_ASTROCYTE_MARKERS		42	-0.382614	-1.1992	0.218543	0.310505	1	341	tags=7%, list=2%, signal=7%	NA
KOYAMA_SEMA3B_TARGETS_DN	KOYAMA_SEMA3B_TARGETS_DN		382	-0.283473	-1.19908	0.11032	0.310419	1	1877	tags=13%, list=9%, signal=14%	NA
MASSARWEH_TAMOXIFEN_RESISTANCE_DN	MASSARWEH_TAMOXIFEN_RESISTANCE_DN		236	-0.296814	-1.19888	0.139442	0.310487	1	2884	tags=22%, list=13%, signal=25%	NA
GALINDO_IMMUNE_RESPONSE_TO_ENTEROTOXIN	GALINDO_IMMUNE_RESPONSE_TO_ENTEROTOXIN		83	-0.337444	-1.19855	0.192931	0.310754	1	1760	tags=22%, list=8%, signal=24%	NA
CAIRO_HEPATOBLASTOMA_POOR_SURVIVAL	CAIRO_HEPATOBLASTOMA_POOR_SURVIVAL		16	-0.461034	-1.19838	0.243636	0.310732	1	47	tags=6%, list=0%, signal=6%	NA
ALFANO_MYC_TARGETS	ALFANO_MYC_TARGETS		233	-0.299256	-1.19792	0.135204	0.311196	1	905	tags=9%, list=4%, signal=9%	NA
VECCHI_GASTRIC_CANCER_ADVANCED_VS_EARLY_UP	VECCHI_GASTRIC_CANCER_ADVANCED_VS_EARLY_UP		167	-0.30121	-1.19706	0.149215	0.312329	1	3060	tags=20%, list=14%, signal=24%	NA
HOSHIDA_LIVER_CANCER_SUBCLASS_S3	HOSHIDA_LIVER_CANCER_SUBCLASS_S3		265	-0.292381	-1.19644	0.143758	0.313069	1	3168	tags=19%, list=15%, signal=22%	NA
NIELSEN_LEIOMYOSARCOMA_CNN1_DN	NIELSEN_LEIOMYOSARCOMA_CNN1_DN		20	-0.444522	-1.19527	0.245421	0.314682	1	1789	tags=20%, list=8%, signal=22%	NA
SHIPP_DLBCL_VS_FOLLICULAR_LYMPHOMA_DN	SHIPP_DLBCL_VS_FOLLICULAR_LYMPHOMA_DN		44	-0.372481	-1.19509	0.199675	0.314705	1	2574	tags=25%, list=12%, signal=28%	NA
TIEN_INTESTINE_PROBIOTICS_24HR_UP	TIEN_INTESTINE_PROBIOTICS_24HR_UP		546	-0.275974	-1.19494	0.074115	0.314657	1	2569	tags=21%, list=12%, signal=23%	NA
LEIN_PONS_MARKERS	LEIN_PONS_MARKERS		87	-0.333775	-1.19429	0.199418	0.315445	1	2347	tags=15%, list=11%, signal=17%	NA
KYNG_DNA_DAMAGE_BY_GAMMA_RADIATION	KYNG_DNA_DAMAGE_BY_GAMMA_RADIATION		80	-0.342852	-1.19414	0.196594	0.31541	1	2660	tags=20%, list=12%, signal=23%	NA
BROWNE_HCMV_INFECTION_18HR_DN	BROWNE_HCMV_INFECTION_18HR_DN		174	-0.303558	-1.19331	0.146703	0.316448	1	1251	tags=10%, list=6%, signal=10%	NA
KRIGE_AMINO_ACID_DEPRIVATION	KRIGE_AMINO_ACID_DEPRIVATION		29	-0.408133	-1.19325	0.248252	0.316256	1	1042	tags=31%, list=5%, signal=33%	NA
VERHAAK_GLIOBLASTOMA_NEURAL	VERHAAK_GLIOBLASTOMA_NEURAL		125	-0.319708	-1.19324	0.182961	0.315989	1	4455	tags=31%, list=21%, signal=39%	NA
WANG_NFKB_TARGETS	WANG_NFKB_TARGETS		25	-0.423945	-1.19247	0.246324	0.317003	1	236	tags=8%, list=1%, signal=8%	NA
WANG_HCP_PROSTATE_CANCER	WANG_HCP_PROSTATE_CANCER		107	-0.323137	-1.19181	0.176385	0.317809	1	1667	tags=16%, list=8%, signal=17%	NA
DIAZ_CHRONIC_MEYLOGENOUS_LEUKEMIA_DN	DIAZ_CHRONIC_MEYLOGENOUS_LEUKEMIA_DN		116	-0.324848	-1.19146	0.18272	0.318082	1	2121	tags=22%, list=10%, signal=25%	NA
VANDESLUIS_COMMD1_TARGETS_GROUP_3_UP	VANDESLUIS_COMMD1_TARGETS_GROUP_3_UP		88	-0.333131	-1.19056	0.20205	0.319302	1	1003	tags=10%, list=5%, signal=11%	NA
GRESHOCK_CANCER_COPY_NUMBER_UP	GRESHOCK_CANCER_COPY_NUMBER_UP		319	-0.283253	-1.18931	0.132616	0.321096	1	3669	tags=30%, list=17%, signal=35%	NA
PETROVA_PROX1_TARGETS_DN	PETROVA_PROX1_TARGETS_DN		63	-0.350271	-1.1889	0.215409	0.321515	1	2311	tags=22%, list=11%, signal=25%	NA
SASSON_RESPONSE_TO_GONADOTROPHINS_UP	SASSON_RESPONSE_TO_GONADOTROPHINS_UP		90	-0.332686	-1.18885	0.184524	0.321306	1	4037	tags=37%, list=19%, signal=45%	NA
ZHAN_MULTIPLE_MYELOMA_CD1_VS_CD2_UP	ZHAN_MULTIPLE_MYELOMA_CD1_VS_CD2_UP		63	-0.351365	-1.1887	0.220126	0.321259	1	2084	tags=25%, list=10%, signal=28%	NA
HOWLIN_PUBERTAL_MAMMARY_GLAND	HOWLIN_PUBERTAL_MAMMARY_GLAND		66	-0.343273	-1.18825	0.197749	0.321702	1	3701	tags=27%, list=17%, signal=33%	NA
LIU_SOX4_TARGETS_DN	LIU_SOX4_TARGETS_DN		298	-0.288523	-1.18812	0.119512	0.321636	1	2986	tags=23%, list=14%, signal=26%	NA
MIKKELSEN_ES_ICP_WITH_H3K4ME3	MIKKELSEN_ES_ICP_WITH_H3K4ME3		687	-0.27169	-1.18793	0.0759358	0.321651	1	3334	tags=17%, list=15%, signal=19%	NA
HUPER_BREAST_BASAL_VS_LUMINAL_DN	HUPER_BREAST_BASAL_VS_LUMINAL_DN		59	-0.355609	-1.18734	0.215434	0.32237	1	1618	tags=14%, list=7%, signal=15%	NA
BROWNE_HCMV_INFECTION_18HR_UP	BROWNE_HCMV_INFECTION_18HR_UP		175	-0.301276	-1.18721	0.159895	0.322276	1	3651	tags=30%, list=17%, signal=35%	NA
CAIRO_HEPATOBLASTOMA_CLASSES_DN	CAIRO_HEPATOBLASTOMA_CLASSES_DN		205	-0.296925	-1.18675	0.148631	0.322767	1	3583	tags=21%, list=17%, signal=25%	NA
AMIT_EGF_RESPONSE_60_HELA	AMIT_EGF_RESPONSE_60_HELA		44	-0.374384	-1.18674	0.222962	0.322503	1	3198	tags=43%, list=15%, signal=51%	NA
VERRECCHIA_EARLY_RESPONSE_TO_TGFB1	VERRECCHIA_EARLY_RESPONSE_TO_TGFB1		58	-0.357842	-1.18663	0.218101	0.322425	1	954	tags=14%, list=4%, signal=14%	NA
VANTVEER_BREAST_CANCER_ESR1_UP	VANTVEER_BREAST_CANCER_ESR1_UP		162	-0.303544	-1.18566	0.163102	0.323731	1	4279	tags=32%, list=20%, signal=40%	NA
KOBAYASHI_EGFR_SIGNALING_24HR_UP	KOBAYASHI_EGFR_SIGNALING_24HR_UP		99	-0.323987	-1.18546	0.198462	0.323793	1	1861	tags=19%, list=9%, signal=21%	NA
CUI_TCF21_TARGETS_DN	CUI_TCF21_TARGETS_DN		30	-0.404463	-1.1852	0.25913	0.323924	1	1554	tags=23%, list=7%, signal=25%	NA
TURASHVILI_BREAST_LOBULAR_CARCINOMA_VS_LOBULAR_NORMAL_UP	TURASHVILI_BREAST_LOBULAR_CARCINOMA_VS_LOBULAR_NORMAL_UP		94	-0.32809	-1.18503	0.18546	0.32393	1	2769	tags=16%, list=13%, signal=18%	NA
WEST_ADRENOCORTICAL_TUMOR_UP	WEST_ADRENOCORTICAL_TUMOR_UP		286	-0.283375	-1.18463	0.142512	0.324328	1	3581	tags=29%, list=17%, signal=34%	NA
MCMURRAY_TP53_HRAS_COOPERATION_RESPONSE_UP	MCMURRAY_TP53_HRAS_COOPERATION_RESPONSE_UP		26	-0.424087	-1.18415	0.227437	0.324861	1	2118	tags=23%, list=10%, signal=26%	NA
BRUINS_UVC_RESPONSE_VIA_TP53_GROUP_B	BRUINS_UVC_RESPONSE_VIA_TP53_GROUP_B		529	-0.27498	-1.18356	0.0955631	0.325568	1	3275	tags=20%, list=15%, signal=23%	NA
TIEN_INTESTINE_PROBIOTICS_6HR_UP	TIEN_INTESTINE_PROBIOTICS_6HR_UP		55	-0.361972	-1.18344	0.22187	0.325498	1	4129	tags=25%, list=19%, signal=31%	NA
YANG_BREAST_CANCER_ESR1_BULK_DN	YANG_BREAST_CANCER_ESR1_BULK_DN		22	-0.424077	-1.18317	0.25	0.325675	1	3225	tags=36%, list=15%, signal=43%	NA
LIU_BREAST_CANCER	LIU_BREAST_CANCER		28	-0.409776	-1.18303	0.242525	0.325628	1	4747	tags=43%, list=22%, signal=55%	NA
TOMLINS_PROSTATE_CANCER_UP	TOMLINS_PROSTATE_CANCER_UP		40	-0.378803	-1.18272	0.253054	0.325862	1	4164	tags=40%, list=19%, signal=49%	NA
WONG_ENDMETRIUM_CANCER_UP	WONG_ENDMETRIUM_CANCER_UP		25	-0.421739	-1.18246	0.254237	0.326002	1	1796	tags=16%, list=8%, signal=17%	NA
FARDIN_HYPOXIA_11	FARDIN_HYPOXIA_11		32	-0.38947	-1.18226	0.236395	0.326041	1	2804	tags=31%, list=13%, signal=36%	NA
HOWLIN_CITED1_TARGETS_1_UP	HOWLIN_CITED1_TARGETS_1_UP		34	-0.389438	-1.18205	0.230375	0.3261	1	646	tags=12%, list=3%, signal=12%	NA
BERTUCCI_INVASIVE_CARCINOMA_DUCTAL_VS_LOBULAR_DN	BERTUCCI_INVASIVE_CARCINOMA_DUCTAL_VS_LOBULAR_DN		45	-0.369714	-1.18106	0.241852	0.327461	1	2459	tags=20%, list=11%, signal=23%	NA
BOYLAN_MULTIPLE_MYELOMA_D_UP	BOYLAN_MULTIPLE_MYELOMA_D_UP		85	-0.337321	-1.18066	0.206795	0.327803	1	2092	tags=20%, list=10%, signal=22%	NA
WANG_ADIPOGENIC_GENES_REPRESSED_BY_SIRT1	WANG_ADIPOGENIC_GENES_REPRESSED_BY_SIRT1		26	-0.415464	-1.18001	0.255932	0.328582	1	1492	tags=19%, list=7%, signal=21%	NA
KRIEG_HYPOXIA_VIA_KDM3A	KRIEG_HYPOXIA_VIA_KDM3A		53	-0.357979	-1.18001	0.216129	0.328321	1	2760	tags=21%, list=13%, signal=24%	NA
STEIN_ESRRA_TARGETS_UP	STEIN_ESRRA_TARGETS_UP		368	-0.280404	-1.17913	0.120892	0.329528	1	3924	tags=28%, list=18%, signal=34%	NA
ALCALAY_AML_BY_NPM1_LOCALIZATION_DN	ALCALAY_AML_BY_NPM1_LOCALIZATION_DN		181	-0.297825	-1.17846	0.174757	0.330355	1	1804	tags=13%, list=8%, signal=14%	NA
SCHRAETS_MLL_TARGETS_DN	SCHRAETS_MLL_TARGETS_DN		32	-0.397052	-1.17834	0.240614	0.330279	1	931	tags=19%, list=4%, signal=20%	NA
STAEGE_EWING_FAMILY_TUMOR	STAEGE_EWING_FAMILY_TUMOR		31	-0.39719	-1.17831	0.239933	0.330034	1	1548	tags=16%, list=7%, signal=17%	NA
ZHANG_BREAST_CANCER_PROGENITORS_DN	ZHANG_BREAST_CANCER_PROGENITORS_DN		139	-0.312533	-1.17753	0.180654	0.331053	1	2925	tags=24%, list=14%, signal=27%	NA
TIAN_BHLHA15_TARGETS	TIAN_BHLHA15_TARGETS		15	-0.4625	-1.17742	0.248544	0.330965	1	2013	tags=33%, list=9%, signal=37%	NA
PEDERSEN_TARGETS_OF_611CTF_ISOFORM_OF_ERBB2	PEDERSEN_TARGETS_OF_611CTF_ISOFORM_OF_ERBB2		73	-0.339148	-1.1774	0.210762	0.330729	1	2725	tags=26%, list=13%, signal=30%	NA
WOOD_EBV_EBNA1_TARGETS_UP	WOOD_EBV_EBNA1_TARGETS_UP		110	-0.317336	-1.17703	0.182596	0.331087	1	1863	tags=21%, list=9%, signal=23%	NA
ZHONG_SECRETOME_OF_LUNG_CANCER_AND_FIBROBLAST	ZHONG_SECRETOME_OF_LUNG_CANCER_AND_FIBROBLAST		129	-0.31411	-1.17684	0.163866	0.331139	1	3625	tags=29%, list=17%, signal=35%	NA
OLSSON_E2F3_TARGETS_DN	OLSSON_E2F3_TARGETS_DN		47	-0.369734	-1.17575	0.239095	0.332635	1	753	tags=13%, list=3%, signal=13%	NA
GARY_CD5_TARGETS_DN	GARY_CD5_TARGETS_DN		422	-0.276175	-1.17521	0.127315	0.333276	1	3187	tags=28%, list=15%, signal=32%	NA
KAYO_AGING_MUSCLE_UP	KAYO_AGING_MUSCLE_UP		242	-0.286549	-1.17421	0.14196	0.334754	1	2028	tags=14%, list=9%, signal=15%	NA
SMID_BREAST_CANCER_ERBB2_UP	SMID_BREAST_CANCER_ERBB2_UP		140	-0.309111	-1.17357	0.189702	0.33558	1	634	tags=7%, list=3%, signal=7%	NA
IWANAGA_CARCINOGENESIS_BY_KRAS_PTEN_DN	IWANAGA_CARCINOGENESIS_BY_KRAS_PTEN_DN		337	-0.281789	-1.17336	0.134911	0.335642	1	2368	tags=17%, list=11%, signal=19%	NA
GHO_ATF5_TARGETS_DN	GHO_ATF5_TARGETS_DN		16	-0.463517	-1.17324	0.271758	0.335586	1	2983	tags=38%, list=14%, signal=43%	NA
KOKKINAKIS_METHIONINE_DEPRIVATION_48HR_UP	KOKKINAKIS_METHIONINE_DEPRIVATION_48HR_UP		127	-0.313631	-1.17287	0.200569	0.335899	1	3144	tags=27%, list=15%, signal=31%	NA
LIN_TUMOR_ESCAPE_FROM_IMMUNE_ATTACK	LIN_TUMOR_ESCAPE_FROM_IMMUNE_ATTACK		16	-0.462648	-1.17264	0.265957	0.336016	1	2241	tags=25%, list=10%, signal=28%	NA
DAZARD_UV_RESPONSE_CLUSTER_G28	DAZARD_UV_RESPONSE_CLUSTER_G28		20	-0.437832	-1.17162	0.264856	0.337468	1	1202	tags=30%, list=6%, signal=32%	NA
WEI_MIR34A_TARGETS	WEI_MIR34A_TARGETS		144	-0.305428	-1.17097	0.180282	0.338375	1	3742	tags=30%, list=17%, signal=36%	NA
DAZARD_UV_RESPONSE_CLUSTER_G24	DAZARD_UV_RESPONSE_CLUSTER_G24		26	-0.409037	-1.17076	0.263339	0.338433	1	3473	tags=35%, list=16%, signal=41%	NA
ULE_SPLICING_VIA_NOVA2	ULE_SPLICING_VIA_NOVA2		43	-0.362257	-1.17038	0.254457	0.338812	1	2711	tags=23%, list=13%, signal=27%	NA
HOFMANN_CELL_LYMPHOMA_UP	HOFMANN_CELL_LYMPHOMA_UP		50	-0.355573	-1.17034	0.248025	0.338596	1	1917	tags=22%, list=9%, signal=24%	NA
WESTON_VEGFA_TARGETS_3HR	WESTON_VEGFA_TARGETS_3HR		72	-0.33409	-1.16995	0.212121	0.338957	1	2591	tags=21%, list=12%, signal=24%	NA
RICKMAN_TUMOR_DIFFERENTIATED_WELL_VS_MODERATELY_DN	RICKMAN_TUMOR_DIFFERENTIATED_WELL_VS_MODERATELY_DN		108	-0.312345	-1.16978	0.201493	0.338977	1	1278	tags=11%, list=6%, signal=12%	NA
CHANDRAN_METASTASIS_DN	CHANDRAN_METASTASIS_DN		288	-0.285324	-1.16932	0.177108	0.339487	1	2724	tags=15%, list=13%, signal=17%	NA
IVANOVA_HEMATOPOIESIS_STEM_CELL_AND_PROGENITOR	IVANOVA_HEMATOPOIESIS_STEM_CELL_AND_PROGENITOR		654	-0.266746	-1.16901	0.085963	0.339749	1	4150	tags=27%, list=19%, signal=32%	NA
LANDIS_ERBB2_BREAST_TUMORS_65_UP	LANDIS_ERBB2_BREAST_TUMORS_65_UP		22	-0.425738	-1.16807	0.287523	0.340991	1	4682	tags=45%, list=22%, signal=58%	NA
RASHI_RESPONSE_TO_IONIZING_RADIATION_6	RASHI_RESPONSE_TO_IONIZING_RADIATION_6		83	-0.328148	-1.16784	0.225	0.341097	1	2569	tags=24%, list=12%, signal=27%	NA
LINDSTEDT_DENDRITIC_CELL_MATURATION_C	LINDSTEDT_DENDRITIC_CELL_MATURATION_C		67	-0.34232	-1.16662	0.238462	0.342955	1	1540	tags=18%, list=7%, signal=19%	NA
CAIRO_LIVER_DEVELOPMENT_DN	CAIRO_LIVER_DEVELOPMENT_DN		217	-0.290849	-1.16628	0.18226	0.343285	1	2547	tags=17%, list=12%, signal=19%	NA
WANG_BARRETTS_ESOPHAGUS_UP	WANG_BARRETTS_ESOPHAGUS_UP		51	-0.361483	-1.16606	0.23126	0.343386	1	1399	tags=14%, list=6%, signal=15%	NA
BREDEMEYER_RAG_SIGNALING_VIA_ATM_NOT_VIA_NFKB_UP	BREDEMEYER_RAG_SIGNALING_VIA_ATM_NOT_VIA_NFKB_UP		46	-0.365313	-1.16576	0.250394	0.343629	1	1953	tags=26%, list=9%, signal=29%	NA
GOLUB_ALL_VS_AML_DN	GOLUB_ALL_VS_AML_DN		24	-0.413587	-1.1655	0.263717	0.343797	1	1185	tags=29%, list=5%, signal=31%	NA
CHESLER_BRAIN_QTL_CIS	CHESLER_BRAIN_QTL_CIS		72	-0.337817	-1.16543	0.219325	0.343638	1	3561	tags=32%, list=16%, signal=38%	NA
CHIBA_RESPONSE_TO_TSA_UP	CHIBA_RESPONSE_TO_TSA_UP		51	-0.355601	-1.16534	0.220126	0.343511	1	757	tags=10%, list=3%, signal=10%	NA
OUELLET_CULTURED_OVARIAN_CANCER_INVASIVE_VS_LMP_DN	OUELLET_CULTURED_OVARIAN_CANCER_INVASIVE_VS_LMP_DN		33	-0.394922	-1.16503	0.263423	0.343764	1	1741	tags=12%, list=8%, signal=13%	NA
NOJIMA_SFRP2_TARGETS_UP	NOJIMA_SFRP2_TARGETS_UP		31	-0.391702	-1.16418	0.241993	0.344926	1	1119	tags=19%, list=5%, signal=20%	NA
WEST_ADRENOCORTICAL_TUMOR_MARKERS_DN	WEST_ADRENOCORTICAL_TUMOR_MARKERS_DN		20	-0.431935	-1.16285	0.270718	0.346927	1	41	tags=5%, list=0%, signal=5%	NA
SESTO_RESPONSE_TO_UV_C8	SESTO_RESPONSE_TO_UV_C8		72	-0.337252	-1.16206	0.233333	0.348015	1	3924	tags=38%, list=18%, signal=46%	NA
COULOUARN_TEMPORAL_TGFB1_SIGNATURE_DN	COULOUARN_TEMPORAL_TGFB1_SIGNATURE_DN		133	-0.304758	-1.16191	0.201389	0.347978	1	1507	tags=15%, list=7%, signal=16%	NA
SCHLESINGER_METHYLATED_DE_NOVO_IN_CANCER	SCHLESINGER_METHYLATED_DE_NOVO_IN_CANCER		85	-0.32738	-1.16187	0.215134	0.347769	1	850	tags=11%, list=4%, signal=11%	NA
WANG_ESOPHAGUS_CANCER_VS_NORMAL_DN	WANG_ESOPHAGUS_CANCER_VS_NORMAL_DN		100	-0.314697	-1.16185	0.202346	0.347526	1	3565	tags=29%, list=16%, signal=35%	NA
KRIEG_HYPOXIA_NOT_VIA_KDM3A	KRIEG_HYPOXIA_NOT_VIA_KDM3A		710	-0.264061	-1.16178	0.0998914	0.34735	1	2468	tags=19%, list=11%, signal=21%	NA
YAMAZAKI_TCEB3_TARGETS_DN	YAMAZAKI_TCEB3_TARGETS_DN		209	-0.292019	-1.16152	0.16838	0.347533	1	3389	tags=25%, list=16%, signal=30%	NA
NIELSEN_GIST_VS_SYNOVIAL_SARCOMA_DN	NIELSEN_GIST_VS_SYNOVIAL_SARCOMA_DN		19	-0.436129	-1.16138	0.29529	0.347465	1	569	tags=16%, list=3%, signal=16%	NA
BROWNE_HCMV_INFECTION_14HR_UP	BROWNE_HCMV_INFECTION_14HR_UP		156	-0.301102	-1.16128	0.18724	0.34736	1	2805	tags=25%, list=13%, signal=29%	NA
MCDOWELL_ACUTE_LUNG_INJURY_UP	MCDOWELL_ACUTE_LUNG_INJURY_UP		45	-0.359327	-1.16021	0.252595	0.348954	1	1042	tags=18%, list=5%, signal=19%	NA
LINDSTEDT_DENDRITIC_CELL_MATURATION_B	LINDSTEDT_DENDRITIC_CELL_MATURATION_B		52	-0.357307	-1.15943	0.274351	0.350041	1	2597	tags=29%, list=12%, signal=33%	NA
YANG_BREAST_CANCER_ESR1_BULK_UP	YANG_BREAST_CANCER_ESR1_BULK_UP		26	-0.409797	-1.15882	0.269982	0.350822	1	1636	tags=23%, list=8%, signal=25%	NA
DUTTA_APOPTOSIS_VIA_NFKB	DUTTA_APOPTOSIS_VIA_NFKB		33	-0.384056	-1.15781	0.274062	0.352277	1	1169	tags=21%, list=5%, signal=22%	NA
BURTON_ADIPOGENESIS_5	BURTON_ADIPOGENESIS_5		117	-0.309648	-1.15661	0.218341	0.354077	1	1612	tags=14%, list=7%, signal=15%	NA
TORCHIA_TARGETS_OF_EWSR1_FLI1_FUSION_UP	TORCHIA_TARGETS_OF_EWSR1_FLI1_FUSION_UP		255	-0.283876	-1.15658	0.188045	0.35384	1	3449	tags=22%, list=16%, signal=26%	NA
SMID_BREAST_CANCER_BASAL_DN	SMID_BREAST_CANCER_BASAL_DN		667	-0.262283	-1.15594	0.10022	0.354628	1	2772	tags=15%, list=13%, signal=17%	NA
FONTAINE_FOLLICULAR_THYROID_ADENOMA_UP	FONTAINE_FOLLICULAR_THYROID_ADENOMA_UP		71	-0.332973	-1.1557	0.226475	0.354731	1	2975	tags=24%, list=14%, signal=28%	NA
JIANG_AGING_CEREBRAL_CORTEX_DN	JIANG_AGING_CEREBRAL_CORTEX_DN		54	-0.351174	-1.15555	0.231612	0.354707	1	3406	tags=30%, list=16%, signal=35%	NA
MORI_PLASMA_CELL_DN	MORI_PLASMA_CELL_DN		29	-0.394452	-1.15543	0.269036	0.354641	1	2149	tags=31%, list=10%, signal=34%	NA
BOYAULT_LIVER_CANCER_SUBCLASS_G1_UP	BOYAULT_LIVER_CANCER_SUBCLASS_G1_UP		109	-0.312742	-1.15412	0.233138	0.35667	1	2413	tags=21%, list=11%, signal=24%	NA
GUILLAUMOND_KLF10_TARGETS_UP	GUILLAUMOND_KLF10_TARGETS_UP		51	-0.351487	-1.15338	0.252525	0.357655	1	1299	tags=14%, list=6%, signal=15%	NA
BLUM_RESPONSE_TO_SALIRASIB_UP	BLUM_RESPONSE_TO_SALIRASIB_UP		239	-0.284369	-1.15332	0.189017	0.357449	1	4137	tags=34%, list=19%, signal=42%	NA
BOQUEST_STEM_CELL_UP	BOQUEST_STEM_CELL_UP		255	-0.282364	-1.15295	0.187661	0.357821	1	1584	tags=12%, list=7%, signal=13%	NA
SERVITJA_LIVER_HNF1A_TARGETS_DN	SERVITJA_LIVER_HNF1A_TARGETS_DN		157	-0.296426	-1.15294	0.186903	0.357539	1	2538	tags=14%, list=12%, signal=16%	NA
COLDREN_GEFITINIB_RESISTANCE_DN	COLDREN_GEFITINIB_RESISTANCE_DN		220	-0.286748	-1.15278	0.192893	0.357545	1	2517	tags=11%, list=12%, signal=13%	NA
LIM_MAMMARY_LUMINAL_MATURE_DN	LIM_MAMMARY_LUMINAL_MATURE_DN		98	-0.318813	-1.15188	0.207736	0.358867	1	2336	tags=17%, list=11%, signal=19%	NA
BENNETT_SYSTEMIC_LUPUS_ERYTHEMATOSUS	BENNETT_SYSTEMIC_LUPUS_ERYTHEMATOSUS		29	-0.397351	-1.15186	0.272566	0.358638	1	2630	tags=38%, list=12%, signal=43%	NA
LEIN_NEURON_MARKERS	LEIN_NEURON_MARKERS		65	-0.338334	-1.15123	0.232595	0.359484	1	2143	tags=12%, list=10%, signal=14%	NA
LI_WILMS_TUMOR	LI_WILMS_TUMOR		26	-0.403768	-1.15119	0.278438	0.359265	1	160	tags=8%, list=1%, signal=8%	NA
PEPPER_CHRONIC_LYMPHOCYTIC_LEUKEMIA_UP	PEPPER_CHRONIC_LYMPHOCYTIC_LEUKEMIA_UP		32	-0.385561	-1.14974	0.29097	0.361457	1	784	tags=9%, list=4%, signal=10%	NA
GREENBAUM_E2A_TARGETS_DN	GREENBAUM_E2A_TARGETS_DN		20	-0.414934	-1.14934	0.293194	0.361929	1	5388	tags=55%, list=25%, signal=73%	NA
GREENBAUM_E2A_TARGETS_UP	GREENBAUM_E2A_TARGETS_UP		33	-0.379203	-1.14928	0.267123	0.361747	1	2835	tags=27%, list=13%, signal=31%	NA
MULLIGHAN_MLL_SIGNATURE_1_DN	MULLIGHAN_MLL_SIGNATURE_1_DN		233	-0.283108	-1.14898	0.203655	0.362003	1	3198	tags=20%, list=15%, signal=23%	NA
LAMB_CCND1_TARGETS	LAMB_CCND1_TARGETS		19	-0.429312	-1.14882	0.288256	0.361977	1	1098	tags=21%, list=5%, signal=22%	NA
ALONSO_METASTASIS_EMT_UP	ALONSO_METASTASIS_EMT_UP		36	-0.374441	-1.14863	0.268092	0.362039	1	2653	tags=28%, list=12%, signal=32%	NA
MA_MYELOID_DIFFERENTIATION_UP	MA_MYELOID_DIFFERENTIATION_UP		39	-0.374076	-1.14852	0.262267	0.361932	1	4129	tags=41%, list=19%, signal=51%	NA
WANG_ESOPHAGUS_CANCER_VS_NORMAL_UP	WANG_ESOPHAGUS_CANCER_VS_NORMAL_UP		116	-0.309317	-1.14846	0.223043	0.361749	1	2653	tags=22%, list=12%, signal=24%	NA
TOMIDA_METASTASIS_DN	TOMIDA_METASTASIS_DN		17	-0.434501	-1.14754	0.272727	0.363112	1	1128	tags=24%, list=5%, signal=25%	NA
KAAB_HEART_ATRIUM_VS_VENTRICLE_DN	KAAB_HEART_ATRIUM_VS_VENTRICLE_DN		259	-0.281401	-1.14745	0.174564	0.362976	1	3975	tags=25%, list=18%, signal=30%	NA
ZHAN_LATE_DIFFERENTIATION_GENES_DN	ZHAN_LATE_DIFFERENTIATION_GENES_DN		15	-0.466009	-1.14681	0.302368	0.363862	1	3464	tags=53%, list=16%, signal=63%	NA
FOSTER_KDM1A_TARGETS_DN	FOSTER_KDM1A_TARGETS_DN		202	-0.289271	-1.14632	0.189474	0.364414	1	2509	tags=17%, list=12%, signal=19%	NA
WENG_POR_TARGETS_GLOBAL_DN	WENG_POR_TARGETS_GLOBAL_DN		23	-0.416063	-1.14607	0.297659	0.364557	1	2975	tags=39%, list=14%, signal=45%	NA
JACKSON_DNMT1_TARGETS_UP	JACKSON_DNMT1_TARGETS_UP		76	-0.325917	-1.1459	0.236527	0.364572	1	3121	tags=29%, list=14%, signal=34%	NA
VALK_AML_CLUSTER_12	VALK_AML_CLUSTER_12		29	-0.390243	-1.14576	0.283972	0.364552	1	4150	tags=48%, list=19%, signal=60%	NA
CHIANG_LIVER_CANCER_SUBCLASS_CTNNB1_UP	CHIANG_LIVER_CANCER_SUBCLASS_CTNNB1_UP		169	-0.294108	-1.14548	0.218376	0.364781	1	2733	tags=15%, list=13%, signal=17%	NA
MATTHEWS_AP1_TARGETS	MATTHEWS_AP1_TARGETS		17	-0.437326	-1.14459	0.304104	0.366142	1	640	tags=18%, list=3%, signal=18%	NA
PETRETTO_HEART_MASS_QTL_CIS_UP	PETRETTO_HEART_MASS_QTL_CIS_UP		28	-0.400199	-1.14449	0.264706	0.366014	1	2051	tags=21%, list=9%, signal=24%	NA
MOOTHA_GLYCOGEN_METABOLISM	MOOTHA_GLYCOGEN_METABOLISM		21	-0.425813	-1.14161	0.294014	0.370928	1	3216	tags=29%, list=15%, signal=34%	NA
AMUNDSON_POOR_SURVIVAL_AFTER_GAMMA_RADIATION_8G	AMUNDSON_POOR_SURVIVAL_AFTER_GAMMA_RADIATION_8G		94	-0.311913	-1.14071	0.230194	0.37222	1	3059	tags=30%, list=14%, signal=35%	NA
MCBRYAN_PUBERTAL_BREAST_3_4WK_UP	MCBRYAN_PUBERTAL_BREAST_3_4WK_UP		210	-0.284549	-1.14035	0.214286	0.372568	1	1822	tags=12%, list=8%, signal=13%	NA
BAELDE_DIABETIC_NEPHROPATHY_UP	BAELDE_DIABETIC_NEPHROPATHY_UP		81	-0.326869	-1.1397	0.249626	0.373466	1	742	tags=9%, list=3%, signal=9%	NA
LOPEZ_MBD_TARGETS	LOPEZ_MBD_TARGETS		917	-0.257277	-1.13919	0.111345	0.374161	1	3268	tags=21%, list=15%, signal=24%	NA
PEART_HDAC_PROLIFERATION_CLUSTER_UP	PEART_HDAC_PROLIFERATION_CLUSTER_UP		57	-0.347937	-1.13911	0.252747	0.374028	1	2311	tags=25%, list=11%, signal=27%	NA
CHIARADONNA_NEOPLASTIC_TRANSFORMATION_KRAS_DN	CHIARADONNA_NEOPLASTIC_TRANSFORMATION_KRAS_DN		141	-0.300668	-1.13743	0.240866	0.37679	1	2079	tags=16%, list=10%, signal=18%	NA
VALK_AML_WITH_EVI1	VALK_AML_WITH_EVI1		23	-0.409862	-1.13708	0.305699	0.37713	1	3180	tags=26%, list=15%, signal=31%	NA
SATO_SILENCED_BY_METHYLATION_IN_PANCREATIC_CANCER_2	SATO_SILENCED_BY_METHYLATION_IN_PANCREATIC_CANCER_2		46	-0.357531	-1.13689	0.28858	0.377208	1	1042	tags=9%, list=5%, signal=9%	NA
LI_WILMS_TUMOR_VS_FETAL_KIDNEY_2_DN	LI_WILMS_TUMOR_VS_FETAL_KIDNEY_2_DN		51	-0.347609	-1.13528	0.28871	0.379959	1	221	tags=8%, list=1%, signal=8%	NA
WU_HBX_TARGETS_2_DN	WU_HBX_TARGETS_2_DN		16	-0.44495	-1.13506	0.303509	0.380081	1	3144	tags=38%, list=15%, signal=44%	NA
NAGY_TFTC_COMPONENTS_HUMAN	NAGY_TFTC_COMPONENTS_HUMAN		19	-0.429238	-1.13501	0.308824	0.379848	1	2247	tags=32%, list=10%, signal=35%	NA
SASAKI_ADULT_T_CELL_LEUKEMIA	SASAKI_ADULT_T_CELL_LEUKEMIA		173	-0.289151	-1.13501	0.228232	0.379547	1	3191	tags=25%, list=15%, signal=29%	NA
ZHOU_INFLAMMATORY_RESPONSE_LPS_UP	ZHOU_INFLAMMATORY_RESPONSE_LPS_UP		383	-0.270339	-1.13376	0.184455	0.38149	1	2524	tags=14%, list=12%, signal=15%	NA
BURTON_ADIPOGENESIS_1	BURTON_ADIPOGENESIS_1		33	-0.374687	-1.1337	0.28	0.381289	1	900	tags=18%, list=4%, signal=19%	NA
WU_HBX_TARGETS_1_UP	WU_HBX_TARGETS_1_UP		16	-0.443117	-1.1333	0.301095	0.381759	1	3365	tags=38%, list=16%, signal=44%	NA
SERVITJA_ISLET_HNF1A_TARGETS_UP	SERVITJA_ISLET_HNF1A_TARGETS_UP		161	-0.292944	-1.13216	0.224185	0.383568	1	869	tags=9%, list=4%, signal=9%	NA
VANHARANTA_UTERINE_FIBROID_WITH_7Q_DELETION_DN	VANHARANTA_UTERINE_FIBROID_WITH_7Q_DELETION_DN		36	-0.372073	-1.13001	0.289562	0.387366	1	4244	tags=47%, list=20%, signal=59%	NA
LIU_NASOPHARYNGEAL_CARCINOMA	LIU_NASOPHARYNGEAL_CARCINOMA		67	-0.327092	-1.12985	0.262195	0.38736	1	4616	tags=43%, list=21%, signal=55%	NA
TONKS_TARGETS_OF_RUNX1_RUNX1T1_FUSION_MONOCYTE_DN	TONKS_TARGETS_OF_RUNX1_RUNX1T1_FUSION_MONOCYTE_DN		53	-0.34563	-1.12975	0.280186	0.387224	1	2749	tags=30%, list=13%, signal=34%	NA
MOROSETTI_FACIOSCAPULOHUMERAL_MUSCULAR_DISTROPHY_UP	MOROSETTI_FACIOSCAPULOHUMERAL_MUSCULAR_DISTROPHY_UP		19	-0.421573	-1.12895	0.295918	0.388429	1	27	tags=5%, list=0%, signal=5%	NA
PURBEY_TARGETS_OF_CTBP1_NOT_SATB1_UP	PURBEY_TARGETS_OF_CTBP1_NOT_SATB1_UP		326	-0.268364	-1.12805	0.192814	0.389848	1	3099	tags=22%, list=14%, signal=25%	NA
LI_CISPLATIN_RESISTANCE_DN	LI_CISPLATIN_RESISTANCE_DN		33	-0.377205	-1.12798	0.277597	0.389678	1	886	tags=12%, list=4%, signal=13%	NA
SWEET_KRAS_TARGETS_UP	SWEET_KRAS_TARGETS_UP		82	-0.318851	-1.12725	0.267459	0.390786	1	3562	tags=29%, list=16%, signal=35%	NA
KYNG_ENVIRONMENTAL_STRESS_RESPONSE_NOT_BY_4NQO_IN_WS	KYNG_ENVIRONMENTAL_STRESS_RESPONSE_NOT_BY_4NQO_IN_WS		39	-0.35876	-1.12694	0.288967	0.391044	1	1841	tags=18%, list=9%, signal=20%	NA
RICKMAN_HEAD_AND_NECK_CANCER_F	RICKMAN_HEAD_AND_NECK_CANCER_F		52	-0.349882	-1.12668	0.2912	0.391225	1	1644	tags=12%, list=8%, signal=12%	NA
MELLMAN_TUT1_TARGETS_UP	MELLMAN_TUT1_TARGETS_UP		19	-0.419449	-1.12655	0.325	0.391167	1	3955	tags=47%, list=18%, signal=58%	NA
LEE_LIVER_CANCER_SURVIVAL_DN	LEE_LIVER_CANCER_SURVIVAL_DN		168	-0.290009	-1.12634	0.250338	0.391253	1	3561	tags=27%, list=16%, signal=33%	NA
ACEVEDO_LIVER_TUMOR_VS_NORMAL_ADJACENT_TISSUE_UP	ACEVEDO_LIVER_TUMOR_VS_NORMAL_ADJACENT_TISSUE_UP		821	-0.254594	-1.12634	0.140276	0.390959	1	3996	tags=26%, list=18%, signal=31%	NA
CHIARETTI_ACUTE_LYMPHOBLASTIC_LEUKEMIA_ZAP70	CHIARETTI_ACUTE_LYMPHOBLASTIC_LEUKEMIA_ZAP70		64	-0.33419	-1.12618	0.268634	0.390927	1	1779	tags=11%, list=8%, signal=12%	NA
DORSEY_GAB2_TARGETS	DORSEY_GAB2_TARGETS		31	-0.378304	-1.12546	0.297064	0.391978	1	2958	tags=26%, list=14%, signal=30%	NA
MIKKELSEN_NPC_ICP_WITH_H3K4ME3	MIKKELSEN_NPC_ICP_WITH_H3K4ME3		425	-0.263098	-1.12542	0.188787	0.391756	1	3742	tags=21%, list=17%, signal=25%	NA
WU_SILENCED_BY_METHYLATION_IN_BLADDER_CANCER	WU_SILENCED_BY_METHYLATION_IN_BLADDER_CANCER		54	-0.338454	-1.12519	0.284553	0.391906	1	1626	tags=15%, list=8%, signal=16%	NA
XU_GH1_EXOGENOUS_TARGETS_DN	XU_GH1_EXOGENOUS_TARGETS_DN		117	-0.301314	-1.12476	0.251445	0.392412	1	2764	tags=16%, list=13%, signal=19%	NA
SERVITJA_LIVER_HNF1A_TARGETS_UP	SERVITJA_LIVER_HNF1A_TARGETS_UP		133	-0.296201	-1.12442	0.268326	0.392773	1	1830	tags=16%, list=8%, signal=17%	NA
LANDIS_ERBB2_BREAST_TUMORS_324_UP	LANDIS_ERBB2_BREAST_TUMORS_324_UP		147	-0.292549	-1.12424	0.231507	0.392755	1	2776	tags=22%, list=13%, signal=26%	NA
KUNINGER_IGF1_VS_PDGFB_TARGETS_UP	KUNINGER_IGF1_VS_PDGFB_TARGETS_UP		78	-0.320197	-1.12424	0.269345	0.392462	1	2349	tags=12%, list=11%, signal=13%	NA
TONKS_TARGETS_OF_RUNX1_RUNX1T1_FUSION_SUSTAINDED_IN_ERYTHROCYTE_UP	TONKS_TARGETS_OF_RUNX1_RUNX1T1_FUSION_SUSTAINDED_IN_ERYTHROCYTE_UP		44	-0.352126	-1.1235	0.287879	0.393521	1	672	tags=16%, list=3%, signal=16%	NA
FLECHNER_PBL_KIDNEY_TRANSPLANT_REJECTED_VS_OK_UP	FLECHNER_PBL_KIDNEY_TRANSPLANT_REJECTED_VS_OK_UP		62	-0.334669	-1.12305	0.283721	0.394038	1	3038	tags=34%, list=14%, signal=39%	NA
JISON_SICKLE_CELL_DISEASE_DN	JISON_SICKLE_CELL_DISEASE_DN		174	-0.286198	-1.12114	0.23284	0.397398	1	3615	tags=26%, list=17%, signal=31%	NA
GUO_HEX_TARGETS_UP	GUO_HEX_TARGETS_UP		80	-0.315224	-1.12107	0.266667	0.397227	1	2963	tags=28%, list=14%, signal=32%	NA
RAMPON_ENRICHED_LEARNING_ENVIRONMENT_EARLY_UP	RAMPON_ENRICHED_LEARNING_ENVIRONMENT_EARLY_UP		15	-0.453759	-1.12074	0.316456	0.397554	1	4150	tags=40%, list=19%, signal=49%	NA
DITTMER_PTHLH_TARGETS_DN	DITTMER_PTHLH_TARGETS_DN		73	-0.32357	-1.12058	0.286576	0.397546	1	2525	tags=25%, list=12%, signal=28%	NA
SATO_SILENCED_BY_DEACETYLATION_IN_PANCREATIC_CANCER	SATO_SILENCED_BY_DEACETYLATION_IN_PANCREATIC_CANCER		47	-0.350415	-1.12055	0.289764	0.397298	1	966	tags=13%, list=4%, signal=13%	NA
TARTE_PLASMA_CELL_VS_PLASMABLAST_UP	TARTE_PLASMA_CELL_VS_PLASMABLAST_UP		379	-0.263747	-1.12051	0.217799	0.397084	1	1814	tags=9%, list=8%, signal=10%	NA
MOLENAAR_TARGETS_OF_CCND1_AND_CDK4_UP	MOLENAAR_TARGETS_OF_CCND1_AND_CDK4_UP		62	-0.326242	-1.12042	0.269985	0.396943	1	2090	tags=19%, list=10%, signal=21%	NA
XU_HGF_TARGETS_REPRESSED_BY_AKT1_DN	XU_HGF_TARGETS_REPRESSED_BY_AKT1_DN		91	-0.309872	-1.1204	0.280292	0.396662	1	3404	tags=20%, list=16%, signal=23%	NA
POMEROY_MEDULLOBLASTOMA_PROGNOSIS_UP	POMEROY_MEDULLOBLASTOMA_PROGNOSIS_UP		44	-0.352162	-1.11973	0.308661	0.397647	1	4528	tags=34%, list=21%, signal=43%	NA
FONTAINE_PAPILLARY_THYROID_CARCINOMA_DN	FONTAINE_PAPILLARY_THYROID_CARCINOMA_DN		74	-0.322384	-1.11966	0.243119	0.397488	1	696	tags=5%, list=3%, signal=6%	NA
KOYAMA_SEMA3B_TARGETS_UP	KOYAMA_SEMA3B_TARGETS_UP		268	-0.27033	-1.11958	0.208707	0.397321	1	2962	tags=19%, list=14%, signal=22%	NA
GOLDRATH_HOMEOSTATIC_PROLIFERATION	GOLDRATH_HOMEOSTATIC_PROLIFERATION		167	-0.287312	-1.11947	0.247657	0.397224	1	3317	tags=29%, list=15%, signal=34%	NA
RICKMAN_HEAD_AND_NECK_CANCER_E	RICKMAN_HEAD_AND_NECK_CANCER_E		85	-0.315165	-1.11907	0.262925	0.397686	1	745	tags=6%, list=3%, signal=6%	NA
WHITFIELD_CELL_CYCLE_G2	WHITFIELD_CELL_CYCLE_G2		172	-0.287464	-1.11901	0.241427	0.397487	1	2585	tags=22%, list=12%, signal=24%	NA
UZONYI_RESPONSE_TO_LEUKOTRIENE_AND_THROMBIN	UZONYI_RESPONSE_TO_LEUKOTRIENE_AND_THROMBIN		37	-0.367719	-1.11884	0.296422	0.397498	1	966	tags=16%, list=4%, signal=17%	NA
SHEPARD_BMYB_MORPHOLINO_DN	SHEPARD_BMYB_MORPHOLINO_DN		196	-0.28007	-1.11847	0.254215	0.397869	1	2334	tags=15%, list=11%, signal=17%	NA
FORTSCHEGGER_PHF8_TARGETS_DN	FORTSCHEGGER_PHF8_TARGETS_DN		745	-0.253783	-1.11807	0.15393	0.398324	1	3489	tags=23%, list=16%, signal=27%	NA
SCHEIDEREIT_IKK_INTERACTING_PROTEINS	SCHEIDEREIT_IKK_INTERACTING_PROTEINS		58	-0.335559	-1.11804	0.285935	0.398068	1	2722	tags=21%, list=13%, signal=24%	NA
STEIN_ESRRA_TARGETS	STEIN_ESRRA_TARGETS		511	-0.259118	-1.11786	0.180493	0.398098	1	3924	tags=27%, list=18%, signal=32%	NA
HADDAD_T_LYMPHOCYTE_AND_NK_PROGENITOR_UP	HADDAD_T_LYMPHOCYTE_AND_NK_PROGENITOR_UP		76	-0.318661	-1.11784	0.269051	0.39783	1	2773	tags=21%, list=13%, signal=24%	NA
PEREZ_TP53_AND_TP63_TARGETS	PEREZ_TP53_AND_TP63_TARGETS		195	-0.283236	-1.1178	0.242744	0.397594	1	2551	tags=15%, list=12%, signal=17%	NA
ROSS_AML_OF_FAB_M7_TYPE	ROSS_AML_OF_FAB_M7_TYPE		67	-0.323528	-1.11756	0.300151	0.39775	1	1047	tags=10%, list=5%, signal=11%	NA
MANN_RESPONSE_TO_AMIFOSTINE_UP	MANN_RESPONSE_TO_AMIFOSTINE_UP		20	-0.418194	-1.11743	0.323792	0.397681	1	1042	tags=25%, list=5%, signal=26%	NA
HE_PTEN_TARGETS_UP	HE_PTEN_TARGETS_UP		16	-0.434309	-1.11571	0.319109	0.400727	1	1464	tags=31%, list=7%, signal=33%	NA
TAKAO_RESPONSE_TO_UVB_RADIATION_DN	TAKAO_RESPONSE_TO_UVB_RADIATION_DN		98	-0.30327	-1.11498	0.263768	0.401837	1	2945	tags=24%, list=14%, signal=28%	NA
FERNANDEZ_BOUND_BY_MYC	FERNANDEZ_BOUND_BY_MYC		179	-0.28356	-1.11485	0.264822	0.401763	1	3294	tags=24%, list=15%, signal=28%	NA
DELACROIX_RAR_TARGETS_DN	DELACROIX_RAR_TARGETS_DN		24	-0.402499	-1.11468	0.321799	0.40178	1	676	tags=8%, list=3%, signal=9%	NA
ZHAN_MULTIPLE_MYELOMA_MS_DN	ZHAN_MULTIPLE_MYELOMA_MS_DN		43	-0.348892	-1.11358	0.305031	0.403617	1	3875	tags=33%, list=18%, signal=40%	NA
WILSON_PROTEASES_AT_TUMOR_BONE_INTERFACE_UP	WILSON_PROTEASES_AT_TUMOR_BONE_INTERFACE_UP		21	-0.402874	-1.11291	0.338569	0.404567	1	2822	tags=48%, list=13%, signal=55%	NA
URS_ADIPOCYTE_DIFFERENTIATION_UP	URS_ADIPOCYTE_DIFFERENTIATION_UP		73	-0.321096	-1.11283	0.299392	0.404402	1	4301	tags=32%, list=20%, signal=39%	NA
MCBRYAN_PUBERTAL_BREAST_5_6WK_UP	MCBRYAN_PUBERTAL_BREAST_5_6WK_UP		115	-0.2998	-1.11271	0.284732	0.404353	1	2016	tags=17%, list=9%, signal=19%	NA
IVANOVA_HEMATOPOIESIS_STEM_CELL	IVANOVA_HEMATOPOIESIS_STEM_CELL		245	-0.274128	-1.11219	0.250314	0.405062	1	2597	tags=19%, list=12%, signal=21%	NA
ABRAHAM_ALPC_VS_MULTIPLE_MYELOMA_DN	ABRAHAM_ALPC_VS_MULTIPLE_MYELOMA_DN		19	-0.40897	-1.11176	0.336918	0.405586	1	1953	tags=26%, list=9%, signal=29%	NA
AMIT_DELAYED_EARLY_GENES	AMIT_DELAYED_EARLY_GENES		18	-0.424288	-1.11159	0.32554	0.405627	1	2574	tags=33%, list=12%, signal=38%	NA
IWANAGA_CARCINOGENESIS_BY_KRAS_UP	IWANAGA_CARCINOGENESIS_BY_KRAS_UP		162	-0.284528	-1.11078	0.26755	0.406894	1	2646	tags=19%, list=12%, signal=21%	NA
RUTELLA_RESPONSE_TO_HGF_VS_CSF2RB_AND_IL4_DN	RUTELLA_RESPONSE_TO_HGF_VS_CSF2RB_AND_IL4_DN		239	-0.273348	-1.11074	0.233458	0.406664	1	2501	tags=22%, list=12%, signal=24%	NA
PENG_GLUCOSE_DEPRIVATION_UP	PENG_GLUCOSE_DEPRIVATION_UP		46	-0.347405	-1.11035	0.296651	0.407122	1	1610	tags=22%, list=7%, signal=23%	NA
MAEKAWA_ATF2_TARGETS	MAEKAWA_ATF2_TARGETS		24	-0.389905	-1.11008	0.316637	0.407342	1	2109	tags=21%, list=10%, signal=23%	NA
LIM_MAMMARY_LUMINAL_MATURE_UP	LIM_MAMMARY_LUMINAL_MATURE_UP		112	-0.300654	-1.11001	0.289593	0.407154	1	2115	tags=11%, list=10%, signal=12%	NA
BYSTRYKH_HEMATOPOIESIS_STEM_CELL_AND_BRAIN_QTL_TRANS	BYSTRYKH_HEMATOPOIESIS_STEM_CELL_AND_BRAIN_QTL_TRANS		182	-0.284567	-1.10999	0.259894	0.406884	1	3389	tags=23%, list=16%, signal=26%	NA
RUAN_RESPONSE_TO_TROGLITAZONE_DN	RUAN_RESPONSE_TO_TROGLITAZONE_DN		19	-0.424375	-1.1098	0.351159	0.406956	1	1612	tags=21%, list=7%, signal=23%	NA
BILANGES_SERUM_SENSITIVE_VIA_TSC1	BILANGES_SERUM_SENSITIVE_VIA_TSC1		23	-0.406458	-1.10976	0.326568	0.406707	1	2864	tags=22%, list=13%, signal=25%	NA
SHEDDEN_LUNG_CANCER_GOOD_SURVIVAL_A4	SHEDDEN_LUNG_CANCER_GOOD_SURVIVAL_A4		193	-0.281992	-1.10924	0.25426	0.407401	1	3080	tags=21%, list=14%, signal=24%	NA
CHIANG_LIVER_CANCER_SUBCLASS_POLYSOMY7_UP	CHIANG_LIVER_CANCER_SUBCLASS_POLYSOMY7_UP		75	-0.313521	-1.10859	0.29321	0.408379	1	2223	tags=16%, list=10%, signal=18%	NA
HOLLMANN_APOPTOSIS_VIA_CD40_UP	HOLLMANN_APOPTOSIS_VIA_CD40_UP		195	-0.280966	-1.1085	0.278215	0.40825	1	2553	tags=21%, list=12%, signal=23%	NA
BOYAULT_LIVER_CANCER_SUBCLASS_G3_UP	BOYAULT_LIVER_CANCER_SUBCLASS_G3_UP		184	-0.279932	-1.10713	0.267196	0.410536	1	3831	tags=33%, list=18%, signal=40%	NA
BEIER_GLIOMA_STEM_CELL_DN	BEIER_GLIOMA_STEM_CELL_DN		63	-0.324924	-1.10633	0.27476	0.411744	1	2655	tags=21%, list=12%, signal=23%	NA
AMBROSINI_FLAVOPIRIDOL_TREATMENT_TP53	AMBROSINI_FLAVOPIRIDOL_TREATMENT_TP53		107	-0.302355	-1.10602	0.287535	0.41202	1	2546	tags=21%, list=12%, signal=23%	NA
ELVIDGE_HIF1A_TARGETS_DN	ELVIDGE_HIF1A_TARGETS_DN		88	-0.308219	-1.10547	0.296923	0.41279	1	2368	tags=22%, list=11%, signal=24%	NA
ROME_INSULIN_TARGETS_IN_MUSCLE_DN	ROME_INSULIN_TARGETS_IN_MUSCLE_DN		184	-0.28452	-1.10499	0.289646	0.413419	1	3825	tags=23%, list=18%, signal=28%	NA
HENDRICKS_SMARCA4_TARGETS_DN	HENDRICKS_SMARCA4_TARGETS_DN		51	-0.338508	-1.10492	0.306688	0.413249	1	2622	tags=25%, list=12%, signal=29%	NA
DACOSTA_UV_RESPONSE_VIA_ERCC3_COMMON_UP	DACOSTA_UV_RESPONSE_VIA_ERCC3_COMMON_UP		76	-0.319371	-1.10467	0.317221	0.413397	1	4749	tags=41%, list=22%, signal=52%	NA
MIKKELSEN_MEF_HCP_WITH_H3_UNMETHYLATED	MIKKELSEN_MEF_HCP_WITH_H3_UNMETHYLATED		221	-0.273599	-1.10465	0.246231	0.413113	1	1437	tags=5%, list=7%, signal=5%	NA
SARRIO_EPITHELIAL_MESENCHYMAL_TRANSITION_DN	SARRIO_EPITHELIAL_MESENCHYMAL_TRANSITION_DN		149	-0.285677	-1.10436	0.284564	0.413361	1	2972	tags=26%, list=14%, signal=29%	NA
MATZUK_EMBRYONIC_GERM_CELL	MATZUK_EMBRYONIC_GERM_CELL		19	-0.419814	-1.10371	0.315603	0.4143	1	2746	tags=37%, list=13%, signal=42%	NA
TAVAZOIE_METASTASIS	TAVAZOIE_METASTASIS		102	-0.303854	-1.10259	0.305516	0.416147	1	2411	tags=12%, list=11%, signal=13%	NA
DING_LUNG_CANCER_MUTATED_SIGNIFICANTLY	DING_LUNG_CANCER_MUTATED_SIGNIFICANTLY		26	-0.384845	-1.09991	0.331492	0.420936	1	4503	tags=35%, list=21%, signal=44%	NA
GRAHAM_CML_DIVIDING_VS_NORMAL_QUIESCENT_DN	GRAHAM_CML_DIVIDING_VS_NORMAL_QUIESCENT_DN		93	-0.302848	-1.09953	0.307803	0.421356	1	2968	tags=24%, list=14%, signal=27%	NA
MARSHALL_VIRAL_INFECTION_RESPONSE_DN	MARSHALL_VIRAL_INFECTION_RESPONSE_DN		29	-0.372305	-1.09855	0.334454	0.422973	1	3594	tags=34%, list=17%, signal=41%	NA
JIANG_AGING_HYPOTHALAMUS_DN	JIANG_AGING_HYPOTHALAMUS_DN		40	-0.355614	-1.09792	0.328549	0.423826	1	4873	tags=43%, list=23%, signal=55%	NA
GARGALOVIC_RESPONSE_TO_OXIDIZED_PHOSPHOLIPIDS_RED_DN	GARGALOVIC_RESPONSE_TO_OXIDIZED_PHOSPHOLIPIDS_RED_DN		24	-0.391596	-1.0979	0.343154	0.423554	1	3411	tags=33%, list=16%, signal=40%	NA
CADWELL_ATG16L1_TARGETS_DN	CADWELL_ATG16L1_TARGETS_DN		67	-0.321482	-1.09775	0.327718	0.423562	1	3481	tags=28%, list=16%, signal=34%	NA
ZHOU_INFLAMMATORY_RESPONSE_FIMA_UP	ZHOU_INFLAMMATORY_RESPONSE_FIMA_UP		483	-0.254686	-1.09704	0.221053	0.424601	1	2489	tags=14%, list=11%, signal=15%	NA
BLALOCK_ALZHEIMERS_DISEASE_INCIPIENT_DN	BLALOCK_ALZHEIMERS_DISEASE_INCIPIENT_DN		164	-0.283759	-1.09698	0.270092	0.42441	1	3322	tags=26%, list=15%, signal=30%	NA
CHESLER_BRAIN_HIGHEST_GENETIC_VARIANCE	CHESLER_BRAIN_HIGHEST_GENETIC_VARIANCE		34	-0.3589	-1.09573	0.341584	0.426529	1	2644	tags=24%, list=12%, signal=27%	NA
NIELSEN_GIST	NIELSEN_GIST		93	-0.306882	-1.09533	0.313043	0.427004	1	3120	tags=27%, list=14%, signal=31%	NA
STONER_ESOPHAGEAL_CARCINOGENESIS_UP	STONER_ESOPHAGEAL_CARCINOGENESIS_UP		38	-0.353623	-1.0952	0.327119	0.426952	1	3717	tags=34%, list=17%, signal=41%	NA
TRAYNOR_RETT_SYNDROM_UP	TRAYNOR_RETT_SYNDROM_UP		40	-0.352309	-1.09503	0.336717	0.426957	1	2674	tags=23%, list=12%, signal=26%	NA
GOTZMANN_EPITHELIAL_TO_MESENCHYMAL_TRANSITION_UP	GOTZMANN_EPITHELIAL_TO_MESENCHYMAL_TRANSITION_UP		68	-0.319952	-1.09499	0.313609	0.426715	1	2429	tags=25%, list=11%, signal=28%	NA
SCHOEN_NFKB_SIGNALING	SCHOEN_NFKB_SIGNALING		34	-0.365866	-1.09455	0.347107	0.427281	1	966	tags=15%, list=4%, signal=15%	NA
SHIN_B_CELL_LYMPHOMA_CLUSTER_7	SHIN_B_CELL_LYMPHOMA_CLUSTER_7		27	-0.380049	-1.09304	0.344178	0.42991	1	2954	tags=37%, list=14%, signal=43%	NA
ASTON_MAJOR_DEPRESSIVE_DISORDER_DN	ASTON_MAJOR_DEPRESSIVE_DISORDER_DN		155	-0.284167	-1.09208	0.290407	0.43152	1	3491	tags=25%, list=16%, signal=30%	NA
HALMOS_CEBPA_TARGETS_UP	HALMOS_CEBPA_TARGETS_UP		52	-0.332188	-1.09146	0.331158	0.432409	1	1297	tags=17%, list=6%, signal=18%	NA
NIELSEN_LIPOSARCOMA_UP	NIELSEN_LIPOSARCOMA_UP		18	-0.42558	-1.09103	0.363472	0.432978	1	905	tags=17%, list=4%, signal=17%	NA
ROY_WOUND_BLOOD_VESSEL_UP	ROY_WOUND_BLOOD_VESSEL_UP		49	-0.340403	-1.09054	0.318038	0.433641	1	1111	tags=10%, list=5%, signal=11%	NA
VANDESLUIS_COMMD1_TARGETS_GROUP_4_UP	VANDESLUIS_COMMD1_TARGETS_GROUP_4_UP		19	-0.401564	-1.09037	0.35219	0.433679	1	4296	tags=37%, list=20%, signal=46%	NA
BARRIER_COLON_CANCER_RECURRENCE_UP	BARRIER_COLON_CANCER_RECURRENCE_UP		42	-0.342401	-1.09027	0.345238	0.433574	1	2575	tags=26%, list=12%, signal=30%	NA
IVANOVA_HEMATOPOIESIS_STEM_CELL_SHORT_TERM	IVANOVA_HEMATOPOIESIS_STEM_CELL_SHORT_TERM		31	-0.372471	-1.09026	0.344348	0.433273	1	4162	tags=35%, list=19%, signal=44%	NA
RIZ_ERYTHROID_DIFFERENTIATION	RIZ_ERYTHROID_DIFFERENTIATION		74	-0.305731	-1.08915	0.335855	0.435129	1	3099	tags=30%, list=14%, signal=35%	NA
MURAKAMI_UV_RESPONSE_6HR_UP	MURAKAMI_UV_RESPONSE_6HR_UP		37	-0.352736	-1.08909	0.312605	0.434936	1	3565	tags=32%, list=16%, signal=39%	NA
LEE_LIVER_CANCER_MYC_E2F1_UP	LEE_LIVER_CANCER_MYC_E2F1_UP		56	-0.331741	-1.08894	0.354992	0.434885	1	2155	tags=20%, list=10%, signal=22%	NA
PETROVA_PROX1_TARGETS_UP	PETROVA_PROX1_TARGETS_UP		27	-0.377855	-1.08831	0.338028	0.435771	1	2758	tags=19%, list=13%, signal=21%	NA
HAN_SATB1_TARGETS_UP	HAN_SATB1_TARGETS_UP		384	-0.254413	-1.08537	0.283511	0.441351	1	2912	tags=19%, list=13%, signal=21%	NA
WANG_TUMOR_INVASIVENESS_UP	WANG_TUMOR_INVASIVENESS_UP		365	-0.257126	-1.08419	0.265089	0.443358	1	4252	tags=32%, list=20%, signal=40%	NA
BRUINS_UVC_RESPONSE_VIA_TP53_GROUP_D	BRUINS_UVC_RESPONSE_VIA_TP53_GROUP_D		266	-0.264385	-1.08418	0.280397	0.44305	1	3287	tags=18%, list=15%, signal=21%	NA
RAMALHO_STEMNESS_DN	RAMALHO_STEMNESS_DN		72	-0.314938	-1.08338	0.33137	0.444388	1	1584	tags=19%, list=7%, signal=21%	NA
SWEET_LUNG_CANCER_KRAS_DN	SWEET_LUNG_CANCER_KRAS_DN		423	-0.252057	-1.0833	0.256709	0.444238	1	2653	tags=16%, list=12%, signal=18%	NA
GINESTIER_BREAST_CANCER_20Q13_AMPLIFICATION_DN	GINESTIER_BREAST_CANCER_20Q13_AMPLIFICATION_DN		159	-0.280349	-1.08262	0.309686	0.44524	1	4747	tags=40%, list=22%, signal=50%	NA
BARRIER_COLON_CANCER_RECURRENCE_DN	BARRIER_COLON_CANCER_RECURRENCE_DN		19	-0.40696	-1.08227	0.388489	0.445668	1	2659	tags=32%, list=12%, signal=36%	NA
PANGAS_TUMOR_SUPPRESSION_BY_SMAD1_AND_SMAD5_UP	PANGAS_TUMOR_SUPPRESSION_BY_SMAD1_AND_SMAD5_UP		127	-0.284491	-1.08164	0.323362	0.446582	1	1453	tags=12%, list=7%, signal=13%	NA
MURATA_VIRULENCE_OF_H_PILORI	MURATA_VIRULENCE_OF_H_PILORI		24	-0.382858	-1.08116	0.352734	0.447211	1	4083	tags=42%, list=19%, signal=51%	NA
PEREZ_TP63_TARGETS	PEREZ_TP63_TARGETS		333	-0.258882	-1.08071	0.270833	0.447801	1	794	tags=6%, list=4%, signal=6%	NA
BHATI_G2M_ARREST_BY_2METHOXYESTRADIOL_UP	BHATI_G2M_ARREST_BY_2METHOXYESTRADIOL_UP		114	-0.290365	-1.08042	0.309958	0.44804	1	3618	tags=25%, list=17%, signal=29%	NA
PARENT_MTOR_SIGNALING_UP	PARENT_MTOR_SIGNALING_UP		548	-0.249278	-1.07955	0.256608	0.449431	1	2904	tags=20%, list=13%, signal=22%	NA
TING_SILENCED_BY_DICER	TING_SILENCED_BY_DICER		30	-0.368263	-1.07841	0.346359	0.451386	1	360	tags=7%, list=2%, signal=7%	NA
SOTIRIOU_BREAST_CANCER_GRADE_1_VS_3_DN	SOTIRIOU_BREAST_CANCER_GRADE_1_VS_3_DN		51	-0.334222	-1.0783	0.35	0.451267	1	3875	tags=33%, list=18%, signal=41%	NA
OSADA_ASCL1_TARGETS_UP	OSADA_ASCL1_TARGETS_UP		46	-0.345163	-1.07783	0.367622	0.451843	1	218	tags=7%, list=1%, signal=7%	NA
HU_GENOTOXIC_DAMAGE_4HR	HU_GENOTOXIC_DAMAGE_4HR		35	-0.351474	-1.0776	0.355628	0.451976	1	1139	tags=14%, list=5%, signal=15%	NA
WATANABE_RECTAL_CANCER_RADIOTHERAPY_RESPONSIVE_DN	WATANABE_RECTAL_CANCER_RADIOTHERAPY_RESPONSIVE_DN		92	-0.299778	-1.07736	0.316693	0.452141	1	3365	tags=28%, list=16%, signal=33%	NA
SMID_BREAST_CANCER_RELAPSE_IN_BRAIN_DN	SMID_BREAST_CANCER_RELAPSE_IN_BRAIN_DN		79	-0.308129	-1.07728	0.340944	0.451952	1	1953	tags=13%, list=9%, signal=14%	NA
HASLINGER_B_CLL_WITH_CHROMOSOME_12_TRISOMY	HASLINGER_B_CLL_WITH_CHROMOSOME_12_TRISOMY		24	-0.388029	-1.07717	0.347594	0.451857	1	3866	tags=46%, list=18%, signal=56%	NA
LIM_MAMMARY_STEM_CELL_UP	LIM_MAMMARY_STEM_CELL_UP		467	-0.250175	-1.07707	0.281903	0.45175	1	2205	tags=13%, list=10%, signal=14%	NA
NIELSEN_MALIGNAT_FIBROUS_HISTIOCYTOMA_UP	NIELSEN_MALIGNAT_FIBROUS_HISTIOCYTOMA_UP		18	-0.412206	-1.0768	0.361423	0.451977	1	287	tags=11%, list=1%, signal=11%	NA
YAMASHITA_LIVER_CANCER_WITH_EPCAM_DN	YAMASHITA_LIVER_CANCER_WITH_EPCAM_DN		15	-0.427684	-1.07638	0.384615	0.452466	1	93	tags=7%, list=0%, signal=7%	NA
HEIDENBLAD_AMPLICON_8Q24_DN	HEIDENBLAD_AMPLICON_8Q24_DN		43	-0.342808	-1.07622	0.340223	0.452418	1	1275	tags=21%, list=6%, signal=22%	NA
LOPEZ_EPITHELIOID_MESOTHELIOMA	LOPEZ_EPITHELIOID_MESOTHELIOMA		17	-0.416969	-1.07593	0.365809	0.452668	1	87	tags=6%, list=0%, signal=6%	NA
HASLINGER_B_CLL_WITH_6Q21_DELETION	HASLINGER_B_CLL_WITH_6Q21_DELETION		19	-0.40222	-1.07402	0.35348	0.456047	1	3548	tags=42%, list=16%, signal=50%	NA
ONDER_CDH1_SIGNALING_VIA_CTNNB1	ONDER_CDH1_SIGNALING_VIA_CTNNB1		81	-0.300935	-1.07398	0.341606	0.455822	1	3014	tags=20%, list=14%, signal=23%	NA
GILDEA_METASTASIS	GILDEA_METASTASIS		28	-0.369199	-1.07353	0.371429	0.456402	1	3040	tags=29%, list=14%, signal=33%	NA
LOPES_METHYLATED_IN_COLON_CANCER_UP	LOPES_METHYLATED_IN_COLON_CANCER_UP		27	-0.378024	-1.07343	0.363636	0.456278	1	1685	tags=15%, list=8%, signal=16%	NA
MIKKELSEN_NPC_HCP_WITH_H3K4ME3_AND_H3K27ME3	MIKKELSEN_NPC_HCP_WITH_H3K4ME3_AND_H3K27ME3		204	-0.27063	-1.07303	0.310436	0.45674	1	1165	tags=8%, list=5%, signal=8%	NA
GARGALOVIC_RESPONSE_TO_OXIDIZED_PHOSPHOLIPIDS_TURQUOISE_DN	GARGALOVIC_RESPONSE_TO_OXIDIZED_PHOSPHOLIPIDS_TURQUOISE_DN		52	-0.325314	-1.07284	0.322006	0.456822	1	439	tags=4%, list=2%, signal=4%	NA
YAMASHITA_LIVER_CANCER_WITH_EPCAM_UP	YAMASHITA_LIVER_CANCER_WITH_EPCAM_UP		51	-0.3265	-1.07277	0.339744	0.456631	1	3962	tags=29%, list=18%, signal=36%	NA
LIANG_HEMATOPOIESIS_STEM_CELL_NUMBER_SMALL_VS_HUGE_UP	LIANG_HEMATOPOIESIS_STEM_CELL_NUMBER_SMALL_VS_HUGE_UP		37	-0.344334	-1.07168	0.36262	0.45847	1	3826	tags=32%, list=18%, signal=39%	NA
LIEN_BREAST_CARCINOMA_METAPLASTIC	LIEN_BREAST_CARCINOMA_METAPLASTIC		35	-0.352007	-1.0715	0.375	0.458507	1	2654	tags=20%, list=12%, signal=23%	NA
OKAMOTO_LIVER_CANCER_MULTICENTRIC_OCCURRENCE_UP	OKAMOTO_LIVER_CANCER_MULTICENTRIC_OCCURRENCE_UP		24	-0.381696	-1.06941	0.362191	0.462371	1	1469	tags=29%, list=7%, signal=31%	NA
TOOKER_GEMCITABINE_RESISTANCE_DN	TOOKER_GEMCITABINE_RESISTANCE_DN		121	-0.286541	-1.06877	0.334258	0.463373	1	3121	tags=26%, list=14%, signal=30%	NA
YOSHIOKA_LIVER_CANCER_EARLY_RECURRENCE_DN	YOSHIOKA_LIVER_CANCER_EARLY_RECURRENCE_DN		61	-0.321675	-1.06868	0.347962	0.46322	1	2612	tags=23%, list=12%, signal=26%	NA
MARTORIATI_MDM4_TARGETS_FETAL_LIVER_UP	MARTORIATI_MDM4_TARGETS_FETAL_LIVER_UP		213	-0.266334	-1.06862	0.332464	0.463035	1	3237	tags=22%, list=15%, signal=25%	NA
AMIT_SERUM_RESPONSE_20_MCF10A	AMIT_SERUM_RESPONSE_20_MCF10A		21	-0.390263	-1.06859	0.366492	0.462763	1	2303	tags=29%, list=11%, signal=32%	NA
WANG_METASTASIS_OF_BREAST_CANCER_ESR1_DN	WANG_METASTASIS_OF_BREAST_CANCER_ESR1_DN		28	-0.370263	-1.06708	0.350604	0.46562	1	1634	tags=29%, list=8%, signal=31%	NA
ZHOU_INFLAMMATORY_RESPONSE_LIVE_DN	ZHOU_INFLAMMATORY_RESPONSE_LIVE_DN		360	-0.252348	-1.06665	0.308612	0.466142	1	4107	tags=27%, list=19%, signal=33%	NA
ONDER_CDH1_TARGETS_3_UP	ONDER_CDH1_TARGETS_3_UP		17	-0.421133	-1.06612	0.367925	0.466892	1	5259	tags=59%, list=24%, signal=78%	NA
FINETTI_BREAST_CANCERS_KINOME_BLUE	FINETTI_BREAST_CANCERS_KINOME_BLUE		21	-0.385215	-1.06589	0.394415	0.467054	1	5149	tags=43%, list=24%, signal=56%	NA
CHIANG_LIVER_CANCER_SUBCLASS_CTNNB1_DN	CHIANG_LIVER_CANCER_SUBCLASS_CTNNB1_DN		164	-0.275297	-1.06585	0.337466	0.466819	1	1111	tags=8%, list=5%, signal=8%	NA
TAYLOR_METHYLATED_IN_ACUTE_LYMPHOBLASTIC_LEUKEMIA	TAYLOR_METHYLATED_IN_ACUTE_LYMPHOBLASTIC_LEUKEMIA		74	-0.309947	-1.06564	0.362096	0.466969	1	5939	tags=47%, list=27%, signal=65%	NA
LOPEZ_TRANSLATION_VIA_FN1_SIGNALING	LOPEZ_TRANSLATION_VIA_FN1_SIGNALING		35	-0.358032	-1.06473	0.348718	0.468483	1	2677	tags=26%, list=12%, signal=29%	NA
GAL_LEUKEMIC_STEM_CELL_UP	GAL_LEUKEMIC_STEM_CELL_UP		128	-0.280128	-1.06437	0.33427	0.468848	1	3061	tags=20%, list=14%, signal=24%	NA
KLEIN_PRIMARY_EFFUSION_LYMPHOMA_DN	KLEIN_PRIMARY_EFFUSION_LYMPHOMA_DN		56	-0.321061	-1.06426	0.375399	0.468753	1	1985	tags=16%, list=9%, signal=18%	NA
YAGI_AML_WITH_INV_16_TRANSLOCATION	YAGI_AML_WITH_INV_16_TRANSLOCATION		413	-0.25079	-1.06289	0.308876	0.471216	1	3588	tags=25%, list=17%, signal=30%	NA
MATZUK_SPERMATOZOA	MATZUK_SPERMATOZOA		112	-0.287067	-1.06198	0.349711	0.472714	1	4576	tags=26%, list=21%, signal=33%	NA
LASTOWSKA_NEUROBLASTOMA_COPY_NUMBER_DN	LASTOWSKA_NEUROBLASTOMA_COPY_NUMBER_DN		752	-0.239909	-1.06091	0.282774	0.474555	1	3653	tags=24%, list=17%, signal=28%	NA
ROESSLER_LIVER_CANCER_METASTASIS_DN	ROESSLER_LIVER_CANCER_METASTASIS_DN		47	-0.338315	-1.06053	0.363487	0.475013	1	1878	tags=21%, list=9%, signal=23%	NA
SHEPARD_CRUSH_AND_BURN_MUTANT_DN	SHEPARD_CRUSH_AND_BURN_MUTANT_DN		178	-0.268961	-1.06037	0.341301	0.474995	1	2460	tags=17%, list=11%, signal=19%	NA
NGUYEN_NOTCH1_TARGETS_DN	NGUYEN_NOTCH1_TARGETS_DN		86	-0.299786	-1.06023	0.337143	0.474926	1	3377	tags=27%, list=16%, signal=32%	NA
YE_METASTATIC_LIVER_CANCER	YE_METASTATIC_LIVER_CANCER		26	-0.378889	-1.05947	0.354237	0.476155	1	1974	tags=19%, list=9%, signal=21%	NA
GRAESSMANN_RESPONSE_TO_MC_AND_DOXORUBICIN_DN	GRAESSMANN_RESPONSE_TO_MC_AND_DOXORUBICIN_DN		744	-0.240638	-1.05936	0.292111	0.47602	1	4308	tags=31%, list=20%, signal=38%	NA
ZHAN_MULTIPLE_MYELOMA_MF_DN	ZHAN_MULTIPLE_MYELOMA_MF_DN		37	-0.343167	-1.05935	0.373109	0.475714	1	3652	tags=38%, list=17%, signal=45%	NA
ENK_UV_RESPONSE_KERATINOCYTE_UP	ENK_UV_RESPONSE_KERATINOCYTE_UP		524	-0.243868	-1.05909	0.316629	0.475918	1	2074	tags=12%, list=10%, signal=13%	NA
VANLOO_SP3_TARGETS_DN	VANLOO_SP3_TARGETS_DN		85	-0.300021	-1.05856	0.367647	0.476625	1	1799	tags=16%, list=8%, signal=18%	NA
CARD_MIR302A_TARGETS	CARD_MIR302A_TARGETS		77	-0.302776	-1.05843	0.356143	0.476532	1	2672	tags=23%, list=12%, signal=27%	NA
ZHENG_RESPONSE_TO_ARSENITE_DN	ZHENG_RESPONSE_TO_ARSENITE_DN		17	-0.408852	-1.05823	0.391697	0.476585	1	2718	tags=24%, list=13%, signal=27%	NA
BOYAULT_LIVER_CANCER_SUBCLASS_G2	BOYAULT_LIVER_CANCER_SUBCLASS_G2		27	-0.363706	-1.05811	0.382003	0.47654	1	4470	tags=44%, list=21%, signal=56%	NA
MARIADASON_RESPONSE_TO_BUTYRATE_SULINDAC_4	MARIADASON_RESPONSE_TO_BUTYRATE_SULINDAC_4		21	-0.381414	-1.05781	0.362847	0.476832	1	3589	tags=38%, list=17%, signal=46%	NA
COATES_MACROPHAGE_M1_VS_M2_UP	COATES_MACROPHAGE_M1_VS_M2_UP		78	-0.302109	-1.0577	0.380466	0.476709	1	2149	tags=23%, list=10%, signal=26%	NA
GARGALOVIC_RESPONSE_TO_OXIDIZED_PHOSPHOLIPIDS_RED_UP	GARGALOVIC_RESPONSE_TO_OXIDIZED_PHOSPHOLIPIDS_RED_UP		17	-0.410224	-1.05701	0.384181	0.47786	1	900	tags=18%, list=4%, signal=18%	NA
AGUIRRE_PANCREATIC_CANCER_COPY_NUMBER_DN	AGUIRRE_PANCREATIC_CANCER_COPY_NUMBER_DN		231	-0.259629	-1.05494	0.357868	0.481702	1	4104	tags=29%, list=19%, signal=35%	NA
LEE_LIVER_CANCER_E2F1_UP	LEE_LIVER_CANCER_E2F1_UP		62	-0.314605	-1.05448	0.361769	0.482344	1	2155	tags=19%, list=10%, signal=21%	NA
MARTINEZ_RESPONSE_TO_TRABECTEDIN_UP	MARTINEZ_RESPONSE_TO_TRABECTEDIN_UP		69	-0.314426	-1.05393	0.359756	0.483162	1	2645	tags=22%, list=12%, signal=25%	NA
BROWNE_HCMV_INFECTION_20HR_UP	BROWNE_HCMV_INFECTION_20HR_UP		233	-0.260866	-1.05353	0.35443	0.483643	1	2820	tags=20%, list=13%, signal=23%	NA
CASORELLI_APL_SECONDARY_VS_DE_NOVO_UP	CASORELLI_APL_SECONDARY_VS_DE_NOVO_UP		37	-0.344397	-1.05332	0.386023	0.48373	1	2077	tags=24%, list=10%, signal=27%	NA
NIKOLSKY_BREAST_CANCER_6P24_P22_AMPLICON	NIKOLSKY_BREAST_CANCER_6P24_P22_AMPLICON		20	-0.392308	-1.05298	0.377104	0.484101	1	3910	tags=30%, list=18%, signal=37%	NA
ROESSLER_LIVER_CANCER_METASTASIS_UP	ROESSLER_LIVER_CANCER_METASTASIS_UP		105	-0.288735	-1.05267	0.378963	0.4844	1	2227	tags=20%, list=10%, signal=22%	NA
DARWICHE_PAPILLOMA_RISK_HIGH_UP	DARWICHE_PAPILLOMA_RISK_HIGH_UP		144	-0.276716	-1.05247	0.375527	0.484531	1	4143	tags=24%, list=19%, signal=30%	NA
MEISSNER_BRAIN_HCP_WITH_H3K4ME2_AND_H3K27ME3	MEISSNER_BRAIN_HCP_WITH_H3K4ME2_AND_H3K27ME3		57	-0.31605	-1.05153	0.364238	0.486186	1	907	tags=7%, list=4%, signal=7%	NA
CHEBOTAEV_GR_TARGETS_DN	CHEBOTAEV_GR_TARGETS_DN		116	-0.281877	-1.05111	0.365786	0.48675	1	1854	tags=11%, list=9%, signal=12%	NA
HINATA_NFKB_TARGETS_KERATINOCYTE_DN	HINATA_NFKB_TARGETS_KERATINOCYTE_DN		22	-0.375197	-1.05087	0.371963	0.486926	1	4019	tags=32%, list=19%, signal=39%	NA
ZHONG_RESPONSE_TO_AZACITIDINE_AND_TSA_DN	ZHONG_RESPONSE_TO_AZACITIDINE_AND_TSA_DN		67	-0.310767	-1.05076	0.387097	0.486828	1	4215	tags=34%, list=19%, signal=42%	NA
AMIT_SERUM_RESPONSE_120_MCF10A	AMIT_SERUM_RESPONSE_120_MCF10A		63	-0.307744	-1.05035	0.382677	0.487305	1	3378	tags=29%, list=16%, signal=34%	NA
JI_METASTASIS_REPRESSED_BY_STK11	JI_METASTASIS_REPRESSED_BY_STK11		26	-0.362874	-1.05017	0.377517	0.487361	1	3890	tags=27%, list=18%, signal=33%	NA
MISHRA_CARCINOMA_ASSOCIATED_FIBROBLAST_DN	MISHRA_CARCINOMA_ASSOCIATED_FIBROBLAST_DN		23	-0.377848	-1.05002	0.390543	0.487334	1	4296	tags=43%, list=20%, signal=54%	NA
MANTOVANI_NFKB_TARGETS_UP	MANTOVANI_NFKB_TARGETS_UP		43	-0.33525	-1.04973	0.385762	0.48757	1	174	tags=7%, list=1%, signal=7%	NA
ACEVEDO_LIVER_CANCER_WITH_H3K27ME3_DN	ACEVEDO_LIVER_CANCER_WITH_H3K27ME3_DN		203	-0.262949	-1.04872	0.362694	0.489356	1	4503	tags=28%, list=21%, signal=35%	NA
RIZ_ERYTHROID_DIFFERENTIATION_6HR	RIZ_ERYTHROID_DIFFERENTIATION_6HR		40	-0.334486	-1.04801	0.385382	0.49048	1	3480	tags=25%, list=16%, signal=30%	NA
HEDENFALK_BREAST_CANCER_BRCA1_VS_BRCA2	HEDENFALK_BREAST_CANCER_BRCA1_VS_BRCA2		157	-0.270149	-1.04772	0.359946	0.490753	1	3605	tags=25%, list=17%, signal=30%	NA
DORN_ADENOVIRUS_INFECTION_12HR_UP	DORN_ADENOVIRUS_INFECTION_12HR_UP		29	-0.359338	-1.04748	0.398361	0.490893	1	2512	tags=24%, list=12%, signal=27%	NA
NIKOLSKY_BREAST_CANCER_19Q13.1_AMPLICON	NIKOLSKY_BREAST_CANCER_19Q13.1_AMPLICON		22	-0.382161	-1.04706	0.425569	0.491428	1	4564	tags=41%, list=21%, signal=52%	NA
LOPES_METHYLATED_IN_COLON_CANCER_DN	LOPES_METHYLATED_IN_COLON_CANCER_DN		27	-0.360078	-1.04691	0.412811	0.491409	1	1874	tags=15%, list=9%, signal=16%	NA
SMID_BREAST_CANCER_RELAPSE_IN_BONE_UP	SMID_BREAST_CANCER_RELAPSE_IN_BONE_UP		95	-0.289784	-1.0469	0.383721	0.491089	1	794	tags=5%, list=4%, signal=5%	NA
WANG_TARGETS_OF_MLL_CBP_FUSION_UP	WANG_TARGETS_OF_MLL_CBP_FUSION_UP		43	-0.330596	-1.04632	0.392739	0.491981	1	2290	tags=19%, list=11%, signal=21%	NA
RIZKI_TUMOR_INVASIVENESS_2D_DN	RIZKI_TUMOR_INVASIVENESS_2D_DN		63	-0.313146	-1.04628	0.386364	0.491722	1	3337	tags=24%, list=15%, signal=28%	NA
ZHAN_MULTIPLE_MYELOMA_MF_UP	ZHAN_MULTIPLE_MYELOMA_MF_UP		45	-0.325879	-1.04594	0.357616	0.49206	1	1247	tags=13%, list=6%, signal=14%	NA
MATTIOLI_MULTIPLE_MYELOMA_WITH_14Q32_TRANSLOCATIONS	MATTIOLI_MULTIPLE_MYELOMA_WITH_14Q32_TRANSLOCATIONS		35	-0.341965	-1.04487	0.386885	0.494022	1	2119	tags=23%, list=10%, signal=25%	NA
BERENJENO_ROCK_SIGNALING_NOT_VIA_RHOA_UP	BERENJENO_ROCK_SIGNALING_NOT_VIA_RHOA_UP		29	-0.358705	-1.04386	0.39551	0.495812	1	240	tags=10%, list=1%, signal=10%	NA
GEORGES_CELL_CYCLE_MIR192_TARGETS	GEORGES_CELL_CYCLE_MIR192_TARGETS		62	-0.311885	-1.04381	0.386327	0.495609	1	4165	tags=40%, list=19%, signal=50%	NA
HOFMANN_MYELODYSPLASTIC_SYNDROM_RISK_UP	HOFMANN_MYELODYSPLASTIC_SYNDROM_RISK_UP		24	-0.376125	-1.04371	0.404475	0.495469	1	509	tags=13%, list=2%, signal=13%	NA
MARTINEZ_RB1_TARGETS_DN	MARTINEZ_RB1_TARGETS_DN		525	-0.241396	-1.04348	0.340402	0.495631	1	3618	tags=21%, list=17%, signal=25%	NA
GENTILE_UV_RESPONSE_CLUSTER_D5	GENTILE_UV_RESPONSE_CLUSTER_D5		37	-0.342343	-1.04193	0.363636	0.498434	1	2516	tags=30%, list=12%, signal=34%	NA
RUAN_RESPONSE_TO_TNF_TROGLITAZONE_UP	RUAN_RESPONSE_TO_TNF_TROGLITAZONE_UP		17	-0.40393	-1.04168	0.409326	0.498614	1	1319	tags=29%, list=6%, signal=31%	NA
JOHANSSON_BRAIN_CANCER_EARLY_VS_LATE_DN	JOHANSSON_BRAIN_CANCER_EARLY_VS_LATE_DN		45	-0.324964	-1.04145	0.380645	0.498737	1	3457	tags=29%, list=16%, signal=34%	NA
BANDRES_RESPONSE_TO_CARMUSTIN_MGMT_48HR_DN	BANDRES_RESPONSE_TO_CARMUSTIN_MGMT_48HR_DN		161	-0.266257	-1.04049	0.371274	0.500366	1	900	tags=7%, list=4%, signal=7%	NA
PURBEY_TARGETS_OF_CTBP1_AND_SATB1_UP	PURBEY_TARGETS_OF_CTBP1_AND_SATB1_UP		79	-0.292714	-1.04046	0.378698	0.500081	1	4477	tags=30%, list=21%, signal=38%	NA
MARTORIATI_MDM4_TARGETS_NEUROEPITHELIUM_UP	MARTORIATI_MDM4_TARGETS_NEUROEPITHELIUM_UP		167	-0.269732	-1.03976	0.37633	0.501179	1	1760	tags=14%, list=8%, signal=16%	NA
LEIN_OLIGODENDROCYTE_MARKERS	LEIN_OLIGODENDROCYTE_MARKERS		72	-0.299939	-1.0396	0.384743	0.501183	1	3397	tags=25%, list=16%, signal=30%	NA
DORSAM_HOXA9_TARGETS_UP	DORSAM_HOXA9_TARGETS_UP		35	-0.339705	-1.03952	0.409807	0.501003	1	2888	tags=31%, list=13%, signal=36%	NA
RASHI_RESPONSE_TO_IONIZING_RADIATION_5	RASHI_RESPONSE_TO_IONIZING_RADIATION_5		143	-0.269929	-1.03889	0.392473	0.50192	1	2719	tags=20%, list=13%, signal=22%	NA
WILLERT_WNT_SIGNALING	WILLERT_WNT_SIGNALING		22	-0.37715	-1.03886	0.407018	0.501646	1	847	tags=18%, list=4%, signal=19%	NA
DING_LUNG_CANCER_BY_MUTATION_RATE	DING_LUNG_CANCER_BY_MUTATION_RATE		20	-0.392957	-1.03641	0.415301	0.506389	1	5631	tags=50%, list=26%, signal=68%	NA
WEST_ADRENOCORTICAL_TUMOR_DN	WEST_ADRENOCORTICAL_TUMOR_DN		530	-0.24041	-1.03619	0.365276	0.506524	1	2811	tags=15%, list=13%, signal=17%	NA
CUI_TCF21_TARGETS_UP	CUI_TCF21_TARGETS_UP		36	-0.337806	-1.0354	0.410774	0.507816	1	2118	tags=14%, list=10%, signal=15%	NA
KORKOLA_EMBRYONIC_CARCINOMA_VS_SEMINOMA_UP	KORKOLA_EMBRYONIC_CARCINOMA_VS_SEMINOMA_UP		20	-0.377247	-1.0352	0.425891	0.507888	1	355	tags=15%, list=2%, signal=15%	NA
OSMAN_BLADDER_CANCER_DN	OSMAN_BLADDER_CANCER_DN		364	-0.245318	-1.0352	0.370813	0.507561	1	4313	tags=29%, list=20%, signal=35%	NA
GRADE_COLON_VS_RECTAL_CANCER_DN	GRADE_COLON_VS_RECTAL_CANCER_DN		53	-0.316188	-1.03465	0.410853	0.508342	1	909	tags=13%, list=4%, signal=14%	NA
WHITFIELD_CELL_CYCLE_G2_M	WHITFIELD_CELL_CYCLE_G2_M		208	-0.257657	-1.03464	0.38543	0.508023	1	3435	tags=26%, list=16%, signal=31%	NA
HOEBEKE_LYMPHOID_STEM_CELL_DN	HOEBEKE_LYMPHOID_STEM_CELL_DN		84	-0.288986	-1.03348	0.393175	0.510153	1	1951	tags=18%, list=9%, signal=20%	NA
ZWANG_EGF_PERSISTENTLY_DN	ZWANG_EGF_PERSISTENTLY_DN		56	-0.314426	-1.03325	0.391167	0.510297	1	3633	tags=27%, list=17%, signal=32%	NA
LI_INDUCED_T_TO_NATURAL_KILLER_DN	LI_INDUCED_T_TO_NATURAL_KILLER_DN		114	-0.276572	-1.03314	0.392102	0.510186	1	2821	tags=19%, list=13%, signal=22%	NA
ZHAN_MULTIPLE_MYELOMA_MS_UP	ZHAN_MULTIPLE_MYELOMA_MS_UP		46	-0.322114	-1.03193	0.405024	0.512358	1	224	tags=7%, list=1%, signal=7%	NA
SEITZ_NEOPLASTIC_TRANSFORMATION_BY_8P_DELETION_DN	SEITZ_NEOPLASTIC_TRANSFORMATION_BY_8P_DELETION_DN		30	-0.348885	-1.03104	0.410385	0.513816	1	2978	tags=23%, list=14%, signal=27%	NA
KANG_FLUOROURACIL_RESISTANCE_DN	KANG_FLUOROURACIL_RESISTANCE_DN		16	-0.408332	-1.0304	0.441536	0.514904	1	3435	tags=31%, list=16%, signal=37%	NA
HIRSCH_CELLULAR_TRANSFORMATION_SIGNATURE_DN	HIRSCH_CELLULAR_TRANSFORMATION_SIGNATURE_DN		99	-0.281362	-1.03011	0.395455	0.515184	1	2024	tags=19%, list=9%, signal=21%	NA
HASLINGER_B_CLL_WITH_MUTATED_VH_GENES	HASLINGER_B_CLL_WITH_MUTATED_VH_GENES		18	-0.39618	-1.02991	0.445008	0.515279	1	1367	tags=17%, list=6%, signal=18%	NA
MEISSNER_NPC_HCP_WITH_H3_UNMETHYLATED	MEISSNER_NPC_HCP_WITH_H3_UNMETHYLATED		509	-0.239869	-1.02991	0.413559	0.514936	1	1132	tags=7%, list=5%, signal=7%	NA
KAMMINGA_SENESCENCE	KAMMINGA_SENESCENCE		39	-0.32943	-1.02782	0.41806	0.518955	1	2533	tags=15%, list=12%, signal=17%	NA
MAHAJAN_RESPONSE_TO_IL1A_DN	MAHAJAN_RESPONSE_TO_IL1A_DN		74	-0.292038	-1.02781	0.409786	0.518632	1	3090	tags=27%, list=14%, signal=31%	NA
XU_HGF_SIGNALING_NOT_VIA_AKT1_48HR_UP	XU_HGF_SIGNALING_NOT_VIA_AKT1_48HR_UP		35	-0.335669	-1.02776	0.420875	0.518405	1	1477	tags=23%, list=7%, signal=24%	NA
BORLAK_LIVER_CANCER_EGF_UP	BORLAK_LIVER_CANCER_EGF_UP		56	-0.315312	-1.02649	0.435065	0.5207	1	1316	tags=14%, list=6%, signal=15%	NA
VALK_AML_CLUSTER_6	VALK_AML_CLUSTER_6		31	-0.350589	-1.02637	0.403061	0.520607	1	4616	tags=35%, list=21%, signal=45%	NA
BARIS_THYROID_CANCER_UP	BARIS_THYROID_CANCER_UP		23	-0.369786	-1.02595	0.422562	0.521105	1	1960	tags=22%, list=9%, signal=24%	NA
BOYAULT_LIVER_CANCER_SUBCLASS_G6_UP	BOYAULT_LIVER_CANCER_SUBCLASS_G6_UP		63	-0.301964	-1.02534	0.408748	0.522026	1	2728	tags=21%, list=13%, signal=24%	NA
CHEOK_RESPONSE_TO_MERCAPTOPURINE_AND_HD_MTX_DN	CHEOK_RESPONSE_TO_MERCAPTOPURINE_AND_HD_MTX_DN		22	-0.370289	-1.02508	0.422145	0.522238	1	2261	tags=27%, list=10%, signal=30%	NA
CAFFAREL_RESPONSE_TO_THC_UP	CAFFAREL_RESPONSE_TO_THC_UP		33	-0.337713	-1.02415	0.391447	0.523893	1	3107	tags=39%, list=14%, signal=46%	NA
IVANOVSKA_MIR106B_TARGETS	IVANOVSKA_MIR106B_TARGETS		87	-0.282934	-1.02309	0.407953	0.525776	1	3598	tags=26%, list=17%, signal=32%	NA
PUJANA_XPRSS_INT_NETWORK	PUJANA_XPRSS_INT_NETWORK		164	-0.264038	-1.02303	0.41161	0.52557	1	4095	tags=32%, list=19%, signal=40%	NA
HOOI_ST7_TARGETS_DN	HOOI_ST7_TARGETS_DN		113	-0.275371	-1.02295	0.414878	0.525385	1	3834	tags=25%, list=18%, signal=30%	NA
CHANG_IMMORTALIZED_BY_HPV31_DN	CHANG_IMMORTALIZED_BY_HPV31_DN		62	-0.300152	-1.02284	0.419872	0.525242	1	2324	tags=18%, list=11%, signal=20%	NA
LI_PROSTATE_CANCER_EPIGENETIC	LI_PROSTATE_CANCER_EPIGENETIC		30	-0.353439	-1.02273	0.419795	0.525147	1	1685	tags=17%, list=8%, signal=18%	NA
BOHN_PRIMARY_IMMUNODEFICIENCY_SYNDROM_DN	BOHN_PRIMARY_IMMUNODEFICIENCY_SYNDROM_DN		39	-0.332461	-1.02268	0.420622	0.524889	1	3234	tags=36%, list=15%, signal=42%	NA
BRUINS_UVC_RESPONSE_EARLY_LATE	BRUINS_UVC_RESPONSE_EARLY_LATE		298	-0.24585	-1.02228	0.404938	0.525384	1	3061	tags=22%, list=14%, signal=25%	NA
WONG_ENDMETRIUM_CANCER_DN	WONG_ENDMETRIUM_CANCER_DN		78	-0.289325	-1.02009	0.413417	0.5297	1	847	tags=8%, list=4%, signal=8%	NA
ACEVEDO_LIVER_CANCER_WITH_H3K27ME3_UP	ACEVEDO_LIVER_CANCER_WITH_H3K27ME3_UP		276	-0.249462	-1.01967	0.420859	0.530221	1	2771	tags=12%, list=13%, signal=14%	NA
SESTO_RESPONSE_TO_UV_C1	SESTO_RESPONSE_TO_UV_C1		72	-0.29068	-1.01857	0.405159	0.532158	1	2345	tags=17%, list=11%, signal=19%	NA
LIU_PROSTATE_CANCER_DN	LIU_PROSTATE_CANCER_DN		458	-0.237707	-1.01843	0.426914	0.532079	1	2521	tags=14%, list=12%, signal=16%	NA
BOYAULT_LIVER_CANCER_SUBCLASS_G123_DN	BOYAULT_LIVER_CANCER_SUBCLASS_G123_DN		50	-0.317868	-1.01775	0.431373	0.533126	1	1724	tags=14%, list=8%, signal=15%	NA
VERRECCHIA_RESPONSE_TO_TGFB1_C5	VERRECCHIA_RESPONSE_TO_TGFB1_C5		21	-0.371016	-1.01763	0.442341	0.533062	1	1558	tags=19%, list=7%, signal=21%	NA
ROVERSI_GLIOMA_COPY_NUMBER_DN	ROVERSI_GLIOMA_COPY_NUMBER_DN		53	-0.316207	-1.01746	0.408654	0.533026	1	4991	tags=36%, list=23%, signal=46%	NA
LA_MEN1_TARGETS	LA_MEN1_TARGETS		24	-0.365814	-1.01729	0.434343	0.533058	1	4031	tags=33%, list=19%, signal=41%	NA
LUI_THYROID_CANCER_PAX8_PPARG_DN	LUI_THYROID_CANCER_PAX8_PPARG_DN		44	-0.322868	-1.01602	0.420068	0.535354	1	2735	tags=23%, list=13%, signal=26%	NA
HSIAO_HOUSEKEEPING_GENES	HSIAO_HOUSEKEEPING_GENES		386	-0.238235	-1.01582	0.440047	0.535423	1	3615	tags=23%, list=17%, signal=27%	NA
MARKS_HDAC_TARGETS_UP	MARKS_HDAC_TARGETS_UP		22	-0.36736	-1.01531	0.423423	0.536172	1	1660	tags=27%, list=8%, signal=30%	NA
GOTZMANN_EPITHELIAL_TO_MESENCHYMAL_TRANSITION_DN	GOTZMANN_EPITHELIAL_TO_MESENCHYMAL_TRANSITION_DN		203	-0.255731	-1.0149	0.431373	0.536674	1	3535	tags=27%, list=16%, signal=31%	NA
VANTVEER_BREAST_CANCER_METASTASIS_UP	VANTVEER_BREAST_CANCER_METASTASIS_UP		54	-0.312573	-1.01412	0.448166	0.53794	1	3270	tags=19%, list=15%, signal=22%	NA
WILCOX_RESPONSE_TO_PROGESTERONE_DN	WILCOX_RESPONSE_TO_PROGESTERONE_DN		64	-0.30058	-1.01358	0.43928	0.53869	1	2360	tags=16%, list=11%, signal=17%	NA
GNATENKO_PLATELET_SIGNATURE	GNATENKO_PLATELET_SIGNATURE		46	-0.325917	-1.0133	0.457377	0.538916	1	3477	tags=33%, list=16%, signal=39%	NA
FRASOR_RESPONSE_TO_SERM_OR_FULVESTRANT_UP	FRASOR_RESPONSE_TO_SERM_OR_FULVESTRANT_UP		21	-0.380373	-1.01309	0.440072	0.539045	1	1945	tags=38%, list=9%, signal=42%	NA
HOSHIDA_LIVER_CANCER_SURVIVAL_DN	HOSHIDA_LIVER_CANCER_SURVIVAL_DN		111	-0.273651	-1.01231	0.435644	0.540323	1	2808	tags=21%, list=13%, signal=24%	NA
MOOTHA_PGC	MOOTHA_PGC		407	-0.239148	-1.0119	0.439665	0.540862	1	2900	tags=18%, list=13%, signal=21%	NA
ZHU_CMV_8_HR_DN	ZHU_CMV_8_HR_DN		52	-0.305934	-1.00969	0.444254	0.545124	1	2591	tags=23%, list=12%, signal=26%	NA
CHANG_IMMORTALIZED_BY_HPV31_UP	CHANG_IMMORTALIZED_BY_HPV31_UP		80	-0.2856	-1.00961	0.426647	0.54495	1	4213	tags=31%, list=19%, signal=39%	NA
TONKS_TARGETS_OF_RUNX1_RUNX1T1_FUSION_SUSTAINED_IN_MONOCYTE_UP	TONKS_TARGETS_OF_RUNX1_RUNX1T1_FUSION_SUSTAINED_IN_MONOCYTE_UP		21	-0.368593	-1.00929	0.458404	0.545289	1	376	tags=14%, list=2%, signal=15%	NA
DAVICIONI_RHABDOMYOSARCOMA_PAX_FOXO1_FUSION_DN	DAVICIONI_RHABDOMYOSARCOMA_PAX_FOXO1_FUSION_DN		15	-0.403844	-1.00806	0.461538	0.54755	1	1118	tags=20%, list=5%, signal=21%	NA
HATADA_METHYLATED_IN_LUNG_CANCER_UP	HATADA_METHYLATED_IN_LUNG_CANCER_UP		375	-0.239755	-1.00728	0.451049	0.548805	1	3261	tags=15%, list=15%, signal=18%	NA
ZHANG_ANTIVIRAL_RESPONSE_TO_RIBAVIRIN_DN	ZHANG_ANTIVIRAL_RESPONSE_TO_RIBAVIRIN_DN		50	-0.308219	-1.00648	0.422648	0.550115	1	2748	tags=28%, list=13%, signal=32%	NA
KLEIN_PRIMARY_EFFUSION_LYMPHOMA_UP	KLEIN_PRIMARY_EFFUSION_LYMPHOMA_UP		51	-0.307989	-1.00624	0.43514	0.550282	1	2117	tags=20%, list=10%, signal=22%	NA
MIKKELSEN_ES_ICP_WITH_H3K4ME3_AND_H3K27ME3	MIKKELSEN_ES_ICP_WITH_H3K4ME3_AND_H3K27ME3		132	-0.259185	-1.00596	0.435825	0.5505	1	684	tags=5%, list=3%, signal=5%	NA
PUJANA_BREAST_CANCER_LIT_INT_NETWORK	PUJANA_BREAST_CANCER_LIT_INT_NETWORK		100	-0.273166	-1.00532	0.457726	0.551492	1	3728	tags=27%, list=17%, signal=32%	NA
MATTHEWS_SKIN_CARCINOGENESIS_VIA_JUN	MATTHEWS_SKIN_CARCINOGENESIS_VIA_JUN		15	-0.395854	-1.00462	0.442593	0.55269	1	57	tags=7%, list=0%, signal=7%	NA
HOOI_ST7_TARGETS_UP	HOOI_ST7_TARGETS_UP		83	-0.283797	-1.00305	0.452416	0.555732	1	2152	tags=16%, list=10%, signal=17%	NA
VANOEVELEN_MYOGENESIS_SIN3A_TARGETS	VANOEVELEN_MYOGENESIS_SIN3A_TARGETS		216	-0.248885	-1.00259	0.456662	0.556392	1	2875	tags=19%, list=13%, signal=21%	NA
NAM_FXYD5_TARGETS_DN	NAM_FXYD5_TARGETS_DN		18	-0.382787	-1.00257	0.434164	0.556067	1	3115	tags=28%, list=14%, signal=32%	NA
GUTIERREZ_CHRONIC_LYMPHOCYTIC_LEUKEMIA_DN	GUTIERREZ_CHRONIC_LYMPHOCYTIC_LEUKEMIA_DN		56	-0.299608	-1.00087	0.450301	0.559398	1	2406	tags=21%, list=11%, signal=24%	NA
KYNG_DNA_DAMAGE_BY_GAMMA_AND_UV_RADIATION	KYNG_DNA_DAMAGE_BY_GAMMA_AND_UV_RADIATION		88	-0.276762	-1.00014	0.458209	0.560612	1	2283	tags=22%, list=11%, signal=24%	NA
ZHOU_TNF_SIGNALING_4HR	ZHOU_TNF_SIGNALING_4HR		54	-0.307196	-1.00007	0.465944	0.560396	1	1987	tags=20%, list=9%, signal=22%	NA
BREDEMEYER_RAG_SIGNALING_NOT_VIA_ATM_UP	BREDEMEYER_RAG_SIGNALING_NOT_VIA_ATM_UP		60	-0.287546	-0.999631	0.462875	0.560963	1	4153	tags=30%, list=19%, signal=37%	NA
ACEVEDO_FGFR1_TARGETS_IN_PROSTATE_CANCER_MODEL_DN	ACEVEDO_FGFR1_TARGETS_IN_PROSTATE_CANCER_MODEL_DN		297	-0.239814	-0.998733	0.466667	0.562527	1	3073	tags=15%, list=14%, signal=17%	NA
SCHAEFFER_SOX9_TARGETS_IN_PROSTATE_DEVELOPMENT_UP	SCHAEFFER_SOX9_TARGETS_IN_PROSTATE_DEVELOPMENT_UP		21	-0.363927	-0.998485	0.472371	0.562694	1	907	tags=14%, list=4%, signal=15%	NA
MCGOWAN_RSP6_TARGETS_UP	MCGOWAN_RSP6_TARGETS_UP		18	-0.379508	-0.998339	0.45438	0.562613	1	847	tags=17%, list=4%, signal=17%	NA
MOOTHA_GLYCOLYSIS	MOOTHA_GLYCOLYSIS		20	-0.369114	-0.998108	0.455357	0.56273	1	1972	tags=15%, list=9%, signal=16%	NA
ZHANG_TARGETS_OF_EWSR1_FLI1_FUSION	ZHANG_TARGETS_OF_EWSR1_FLI1_FUSION		87	-0.279211	-0.997335	0.476117	0.564071	1	2574	tags=18%, list=12%, signal=21%	NA
HEIDENBLAD_AMPLIFIED_IN_PANCREATIC_CANCER	HEIDENBLAD_AMPLIFIED_IN_PANCREATIC_CANCER		30	-0.338651	-0.99716	0.46587	0.564074	1	1852	tags=23%, list=9%, signal=25%	NA
HORTON_SREBF_TARGETS	HORTON_SREBF_TARGETS		24	-0.353346	-0.996238	0.430769	0.565628	1	3484	tags=33%, list=16%, signal=40%	NA
[truncated: 1,225 more rows]
