# Supplementary material for: Superenhancer Analysis Defines Novel Epigenomic Subtypes of Non-APL AML, Including an RARα Dependency Targetable by SY-1425, a Potent and Selective RARα Agonist
Source: Oxford University Press journal article supplement (doi:10.1158/2159-8290.cd-17-0399), 2017-07-20
Supplement: 21598290cd170399-sup-181878_2_supp_4135419_vsdnjw.xlsx [file 21598290cd170399-sup-181878_2_supp_4135419_vsdnjw.xlsx]

## Sheet: Supp Table S7
# GREAT version 3.0.0	Species assembly: hg19	Association rule: Basal+extension: 5000 bp upstream, 1000 bp downstream, 1000000 bp max extension, curated regulatory domains included
Supplementary Table S7: GREAT analysis of genes near H3K27ac peaks up-regulated by SY-1425 in RARA-high cell lines in perturbation gene sets
# Ontology summary statistics are provided in the footer.
#
# Ontology	ID	Desc	Rank	HyperP	HyperBonfP	HyperFdrQ	RegionFoldEnrich	ExpFgRegions	FgRegionsHit	BgRegionsHit	FgSetTermCov	TermCov	NumFgGenesHit	NumBgGenesHit	TotalGenes	FgRegionNames	BgRegionNames	FgGeneNames	BgGeneNames
MSigDB Perturbation	MARTENS_BOUND_BY_PML_RARA_FUSION	Genes with promoters occupied by PML-RARA fusion [GeneID=5371,5914] protein in acute promyelocytic leukemia(APL) cells NB4 and two APL primary blasts, based on Chip-seq data.	1	2.79705e-17	9.40928e-14	9.40928e-14	1.79605	123.605	222	3772	0.097028	0.0588547	125	417	423	11,13,14,24,31,37,43,45,48,55,67,80,84,109,112,148,154,177,190,191,221,222,225,240,266,276,289,290,305,310,338,353,369,371,388,401,403,408,425,429,432,434,446,451,457,459,466,487,490,493,495,509,517,525,539,543,562,585,586,588,590,600,616,633,635,641,653,660,663,684,691,696,721,728,742,766,789,804,812,817,820,824,829,834,847,848,854,912,916,947,951,954,961,969,984,996,1022,1061,1077,1085,1092,109…	11,13,14,24,31,37,43,45,48,55,67,80,84,109,112,148,154,177,190,191,221,222,225,240,266,276,286,289,290,305,310,338,353,369,371,388,401,403,408,425,429,430,432,434,446,451,457,459,466,487,490,493,495,509,517,525,539,543,562,585,586,588,590,600,616,633,635,641,653,660,663,684,691,696,721,728,742,766,789,804,812,817,820,824,829,834,841,847,848,854,862,912,916,947,951,954,961,969,984,996,1022,1061,10…	ABHD2,ACP5,ACSL1,ADRBK1,AJAP1,ANKDD1A,ANP32E,APBB1IP,APLP2,ARHGEF2,ASB2,ATP2B4,ATP6V0C,AUH,BANP,BHLHE40,C10orf137,CHD7,CHST15,CORO2A,COTL1,CRTC1,CTSD,CXCR5,DAPK2,DDIT4,DNAJB12,ELF4,FAM53B,FAM96A,FGFR1OP2,FLNB,FNBP1,GALC,GALK2,GFOD1,GRK5,GSE1,GUSB,HECW1,HIP1,HIVEP2,HIVEP3,HMGA1,HNRNPM,HPCAL1,IDH1,IFNAR2,IQSEC1,IRF1,IRF8,ITGA4,ITPR1,ITPR2,LBR,LFNG,LMO2,LTB4R,LYN,MAFB,MCM5,MLXIPL,MRVI1,MYH9,MYO1F,NC…	ABHD2,ABI3,ACP5,ACSF3,ACSL1,ADAM8,ADAMTS10,ADC,ADCY10,ADORA3,ADRBK1,AJAP1,AK1,AKNA,ALDH2,ALOX5AP,ANKDD1A,ANKRD11,ANP32E,ANXA11,APBB1IP,APLP2,ARAP1,ARHGAP30,ARHGEF2,ARID2,ARID3B,ARRB1,ASB2,ATG16L2,ATP2B4,ATP6V0C,ATP8B4,AUH,B3GNT7,B4GALT1,BANF1,BANP,BCL3,BHLHE40,BLM,BRE,BRF1,BZRAP1,C10orf137,C11orf21,C1orf85,C1orf86,C5AR1,C9orf47,CACNA1C,CAMK2G,CAPG,CCDC114,CCND3,CD164,CD58,CD82,CDH23,CDK5,CDS2,CEL…
MSigDB Perturbation	MARTENS_TRETINOIN_RESPONSE_UP	Genes up-regulated in NB4 cells (acute promyelocytic leukemia, APL) in response to tretinoin [PubChem=444795]; based on Chip-seq data.	2	2.43905e-15	8.20495e-12	4.10247e-12	1.7408	123.507	215	3769	0.0939685	0.0570443	134	703	781	5,11,15,21,29,31,34,46,51,70,79,80,82,85,97,103,108,109,113,125,128,135,145,157,174,175,182,190,204,210,211,230,233,246,257,264,266,274,287,288,294,296,304,307,317,332,335,342,345,353,359,368,390,392,395,396,398,419,424,434,445,446,473,511,530,534,546,552,553,574,576,579,583,585,586,588,604,614,615,632,641,642,643,645,650,668,681,682,696,713,714,763,764,773,778,805,808,812,824,832,856,869,872,873…	5,11,15,21,29,31,34,46,51,70,79,80,82,85,97,103,108,109,113,125,128,135,145,157,174,175,182,190,204,210,211,230,233,246,257,264,266,274,287,288,294,296,304,307,317,332,335,342,345,353,359,368,390,392,395,396,398,419,421,424,434,445,446,473,511,530,534,546,552,553,574,576,579,583,585,586,588,604,614,615,632,637,641,642,643,645,650,668,681,682,696,713,714,763,764,773,778,805,808,812,824,832,856,869…	ACVRL1,AGO1,AIPL1,AJAP1,ALAS1,ANGPTL4,AQP9,ASB2,ATP6V0E2,B3GNT6,B3GNT8,BARHL2,BATF2,BPI,BRSK2,C10orf54,C17orf99,C2orf82,CAMKK1,CCL20,CCL24,CCR1,CD300A,CD93,CDK20,CEACAM4,CEACAM8,CHAC1,CHI3L2,CHST15,CLEC14A,COL5A1,CSF1,CTSD,CTXN3,CXCR5,CYP26B1,DHRS2,DHRS3,DMRTA2,DPEP3,DPYSL4,ECHDC3,ELF3,FAM187B,FAM20C,FBP1,FCER2,FGF4,FOXA2,FXYD5,GDF15,GPHA2,GPR12,GPR25,GPR35,HIC1,HPCAL1,IRF1,KCNE4,KNDC1,LFNG,LILRA…	ACE,ACTL7A,ACTL7B,ACVRL1,ADAMTS2,ADAMTS8,ADCYAP1R1,ADRA2A,ADRA2C,ADRB3,AGAP2,AGO1,AGT,AGXT,AIFM3,AIPL1,AIRE,AJAP1,AKT2,ALAS1,ALDH1B1,ALDH3B2,ALOX5AP,AMER3,ANGPTL4,ANGPTL7,ANKK1,ANKRD33,AOC3,APLP1,APOC1,APOL1,APOL4,AQP10,AQP6,AQP9,ARHGEF10L,ARHGEF15,ARSI,ART5,ARTN,ASB10,ASB2,ASCL4,ASIC4,ASPG,ATP1A3,ATP1B2,ATP6V0E2,AVPR2,AXIN2,AZI1,B3GNT6,B3GNT8,B4GALNT4,BARHL2,BARX1,BATF2,BCAM,BCAN,BDKRB2,BIRC7,BP…
MSigDB Perturbation	PARK_TRETINOIN_RESPONSE_AND_PML_RARA_FUSION	Genes up-regulated by tretinoin (ATRA) [PubChem=444795] in U937 cells (acute promyelocytic leukemia, APL) made sensitive to the drug by expression of the PML-RARA fusion [GeneID=5371;5914].	3	1.06943e-14	3.59755e-11	1.19918e-11	4.62752	7.99565	37	244	0.0161713	0.151639	15	30	30	4,15,31,70,113,128,145,174,210,252,332,419,459,514,582,586,652,707,804,916,971,1201,1258,1326,1339,1366,1370,1482,1576,1826,2073,2181,2216,2230,2263,2282,2366	4,15,31,70,113,128,145,174,210,252,332,419,459,514,582,586,606,652,707,804,916,971,1201,1258,1326,1339,1366,1370,1482,1576,1826,2073,2089,2181,2216,2230,2263,2282,2366,2779,2875,2934,3218,3292,3354,3432,3505,3736,3870,4097,4411,4907,5132,5389,5431,5466,5487,5674,5779,5801,5812,6093,6148,6277,6680,7102,7482,7565,7657,7992,8072,8547,9292,9352,9379,9482,9667,9897,10096,10214,10310,10783,11003,11037,…	CD38,ELF4,HOXA1,IDH1,IER3,IRF1,PIK3CG,PIM1,PKN1,PSAP,SLA,SLC2A5,TNFRSF1B,TOP1,UPP1	ALOX5AP,BIK,CD38,CEBPA,CEBPE,ELF4,FGR,HMHA1,HOXA1,IDH1,IER3,IGFBP6,IRF1,JUND,LITAF,LSP1,NDRG1,PIK3CG,PIM1,PKN1,PSAP,RARG,SEMA4D,SLA,SLC2A5,SPI1,TNFAIP2,TNFRSF1B,TOP1,UPP1
MSigDB Perturbation	SMIRNOV_CIRCULATING_ENDOTHELIOCYTES_IN_CANCER_UP	Genes up-regulated in circulating endothelial cells (CEC) from cancer patients compared to those from healthy donors.	4	4.88794e-13	1.6443e-09	4.11076e-10	2.14731	48.4326	104	1478	0.0454546	0.0703654	58	155	160	11,15,43,47,48,51,80,94,110,113,128,129,145,171,174,210,243,278,305,328,332,347,362,368,396,419,446,483,485,499,504,514,546,560,572,575,577,599,605,625,635,652,658,668,677,699,709,742,897,971,1011,1013,1091,1105,1113,1147,1201,1206,1215,1217,1223,1237,1263,1290,1309,1339,1350,1366,1392,1433,1481,1537,1571,1575,1576,1688,1743,1752,1797,1836,1910,1984,1997,2032,2033,2098,2100,2107,2122,2193,2211,22…	11,15,43,47,48,51,80,94,110,113,128,129,145,171,174,210,243,278,305,328,332,347,362,368,396,419,446,483,485,499,504,514,546,560,572,575,577,599,605,625,635,652,658,668,677,699,709,742,897,971,1011,1013,1091,1094,1105,1113,1117,1147,1201,1206,1215,1217,1223,1237,1247,1263,1290,1309,1339,1350,1366,1392,1433,1481,1535,1537,1571,1575,1576,1645,1688,1743,1752,1763,1797,1836,1910,1984,1997,2032,2033,20…	ACSL1,ADM,ANPEP,AQP9,B4GALT5,BCAT1,BHLHE40,BST1,CCL20,CCR1,CD1D,CD93,CDKN1A,CEBPB,CHN1,CIAO1,CTSB,CYP27A1,DAPK2,DHRS3,DSE,DUSP4,ELF4,EPAS1,EPHA4,FBP1,GM2A,HBEGF,HPSE,IER3,IL21R,IRAK3,KDM5B,MAFF,MARCKSL1,MECP2,MINOS1-NBL1,PFKFB3,PMP22,PTGES,RGS16,RGS3,RRAGD,SCML1,SKIL,SLA,SLC23A2,SLC2A3,SMURF2,SPHK1,THBD,THBS1,TNFRSF1B,TNS1,UPB1,VEGFA,WNT5A,ZNF395	ABCA1,ABCG1,ACSL1,ADAP2,ADM,ALOX5,ANPEP,APOB,AQP9,B4GALT5,BCAT1,BHLHE40,BIRC5,BLVRA,BST1,C3AR1,C5AR1,CCL20,CCR1,CD14,CD1D,CD58,CD9,CD93,CDA,CDKN1A,CEBPB,CHI3L1,CHKA,CHN1,CIAO1,CKB,CLN8,CLU,CREM,CSF2RA,CTSB,CTSL,CXCL11,CXCR1,CYP1A1,CYP1B1,CYP27A1,DAPK2,DHCR7,DHRS3,DKK3,DSE,DUSP4,EGR1,ELF4,EMR2,ENG,EPAS1,EPHA4,FBP1,FCGR2A,FPR1,GAB2,GLUL,GM2A,GNA15,HBEGF,HCK,HMOX1,HNMT,HPSE,HRASLS,HS3ST1,HSPA6,IER3,…
MSigDB Perturbation	FERRARI_RESPONSE_TO_FENRETINIDE_UP	Genes up-regulated in HUVEC cells (umbilical vein endothelium) by fenretinide [PubChem=1744].	5	4.41138e-12	1.48399e-08	2.96798e-09	3.81458	9.69964	37	296	0.0161713	0.125	11	21	21	15,18,31,113,128,145,174,210,253,290,332,419,509,563,586,742,807,1136,1164,1217,1263,1392,1503,1576,1592,1927,1939,1986,2100,2122,2216,2263,2271,2325,2429,2735,2762	15,18,31,113,128,145,174,210,253,290,332,419,509,563,586,742,807,1136,1164,1217,1263,1392,1503,1513,1576,1592,1927,1939,1986,2100,2122,2216,2263,2271,2325,2429,2488,2735,2762,2934,3870,3871,4605,4828,4922,5068,5331,5365,5544,5559,5782,5894,5988,6315,6336,6653,7030,7428,7437,7904,7992,8233,8252,8351,8379,8448,8458,9255,9641,9667,9762,9897,10005,10119,10510,11833,11848,13010,13049,13155,13393,14003…	ATF3,BHLHE40,BMP2,CCL20,DDIT4,DHRS3,IRF1,NRIP1,SEMA3C,ST3GAL1,TRIM33	ATF3,BHLHE40,BMP2,C10orf10,CCL20,CXCL2,CXCL3,DDIT3,DDIT4,DHRS3,GPRC5A,HERPUD1,IRF1,KLF7,NRIP1,PTGS2,SELE,SEMA3C,SLC7A5,ST3GAL1,TRIM33
MSigDB Perturbation	KOINUMA_TARGETS_OF_SMAD2_OR_SMAD3	Genes with promoters occupied by SMAD2 or SMAD3 [GeneID=4087, 4088] in HaCaT cells (keratinocyte) according to a ChIP-chip analysis.	6	2.01782e-11	6.78796e-08	1.13133e-08	1.41889	240.328	341	7334	0.149038	0.0464958	201	781	809	3,6,7,9,15,16,17,21,26,37,39,42,55,61,76,79,80,87,108,109,110,113,118,128,129,145,152,162,171,172,174,199,204,207,208,210,219,222,243,248,265,270,271,274,281,294,301,304,307,315,320,330,332,340,351,354,364,368,369,371,378,388,396,398,401,407,408,410,419,422,427,436,446,447,449,462,463,466,470,473,481,492,499,501,504,510,526,527,536,540,552,554,562,563,566,594,595,599,607,610,618,628,630,633,650,6…	3,6,7,9,15,16,17,21,26,37,39,42,55,61,76,79,80,87,108,109,110,113,118,128,129,145,152,162,171,172,174,199,204,207,208,210,219,222,243,248,265,270,271,274,281,294,301,304,307,315,320,330,332,340,351,354,364,368,369,371,378,388,396,398,401,407,408,410,419,422,427,436,446,447,449,462,463,466,470,473,481,492,499,501,504,510,526,527,536,540,552,554,562,563,566,594,595,599,606,607,610,611,618,628,630,6…
,51754,51765,51767,51789,51798,51806,51816,51817,51829,51834,51840,51845,51851,51869,51882,51891,51919,51932,51934,51950,51953,51988,52000,52008,52031,52044,52050,52051,52056,52088,52091,52093,52099,52101,52106,52107,52115,52123,52125,52126,52140,52145,52167,52174,52181,52184,52186,52188,52200,52208,52226,52230,52236,52240,52245,52270,52275,52281,52287,52290,52312,52313,52333,52348,52351,52360,52…	ABHD2,ABR,ACAD9,ACADVL,ACTN1,ACTR3B,ADAM19,ADM,AHR,AKAP13,ALCAM,ANO1,ANTXR2,ARFGAP3,ARHGAP21,ARHGAP32,ARHGEF3,ARID1A,ARL4A,ATF3,ATG12,ATP1B3,B3GNT5,BACH1,BAZ1B,BCAR3,BCAT1,BCL2L11,BTG1,CALM1,CAMKK1,CASZ1,CAV1,CD44,CD55,CDC42EP3,CDH13,CDKN1A,CLSTN1,CMIP,COTL1,CREB3,CTGF,CYP26B1,DACT1,DHRS3,DOCK5,DRAP1,DSC2,DSE,DUSP10,DUSP6,EDIL3,EDN1,ELK3,ENO1,EXT2,F2RL1,FAM213A,FAM76B,FAR1,FERMT1,FOXO3,FST,GADD45…	ABCA5,ABCB6,ABCF2,ABHD2,ABL1,ABLIM1,ABR,ACAD9,ACADVL,ACOX1,ACTN1,ACTR3B,ACYP1,ADAM19,ADAMTS6,ADK,ADM,AEN,AFAP1L2,AGAP3,AGGF1,AGPS,AHNAK,AHR,AIFM1,AKAP13,AKIP1,AKIRIN2,AKR1C2,ALCAM,AMOTL1,AMOTL2,ANKS6,ANLN,ANO1,ANTXR2,ANXA2,ANXA3,ANXA4,AP1S2,AP3S1,AP4B1,APOBEC3B,APOO,ARFGAP3,ARHGAP21,ARHGAP32,ARHGDIB,ARHGEF3,ARHGEF37,ARHGEF5,ARID1A,ARID2,ARID3B,ARL4A,ARRDC1,ATAD2,ATF3,ATG12,ATP1B3,ATP6V1D,ATP6V1E1…
MSigDB Perturbation	ZWANG_CLASS_1_TRANSIENTLY_INDUCED_BY_EGF	Class I of genes transiently induced by EGF [GeneID =1950] in 184A1 cells (mammary epithelium).	7	7.20002e-11	2.42209e-07	3.46012e-08	1.51164	162.076	245	4946	0.10708	0.049535	130	469	482	13,14,16,18,26,31,33,41,45,49,55,63,75,94,96,110,115,117,119,134,142,152,181,191,195,207,208,219,225,235,236,238,239,240,241,244,253,260,271,275,277,290,301,302,308,347,351,357,364,368,371,377,422,424,426,435,439,440,457,458,462,470,471,481,499,500,504,506,508,509,510,538,552,554,555,558,564,565,567,586,595,598,616,619,622,625,629,646,654,656,659,662,668,675,677,703,720,721,751,756,758,780,797,82…	13,14,16,18,26,31,33,41,45,49,55,63,75,94,96,110,115,117,119,134,142,152,181,191,195,207,208,219,225,235,236,238,239,240,241,244,253,260,271,275,277,290,301,302,308,347,351,357,364,368,371,377,422,424,426,435,439,440,457,458,462,470,471,481,499,500,504,506,508,509,510,538,552,554,555,558,564,565,567,586,595,598,616,619,622,625,629,646,654,656,659,662,665,668,675,677,703,720,721,751,756,758,780,79…	ABHD2,AGO2,AGO4,AHR,AKAP12,AKAP13,ANGPTL4,ARAP2,ARFGAP3,ARHGAP21,ARHGEF2,ARHGEF3,ARL15,ARNTL,ATF1,ATP9A,B3GNT2,BACH1,BCAR3,BCOR,BIRC2,BTG1,C12orf44,CAMK2D,CEBPG,CHD1,CHST15,CSRP1,CTBP2,CYTH1,DAAM1,DDIT4,DLX2,DOCK5,DOPEY1,DUSP10,DUSP4,DUSP7,EEF1A1,EFNB2,FAM69A,FBXO31,FNBP1L,FOXC1,FOXN2,FRMD8,FST,GADD45A,GAPT,GCLC,GRAMD3,GRM4,HIF1A,HSH2D,IER2,IFFO2,IL6ST,INSIG2,IRF1,ITGB8,JARID2,KCNE1,KIAA0513,KIAA…	ABHD2,ABL2,ACAN,ACKR3,ACOT4,ACOX3,ACTBL2,ADAM17,ADAMTS1,ADAMTS15,ADAMTS6,ADAMTSL2,ADRB2,AFF4,AGO2,AGO4,AGTR2,AHCTF1,AHR,AKAP12,AKAP13,AKAP2,AKIRIN1,AMOTL2,ANGPTL4,ANKRD12,ANKRD13A,ANKRD28,AQP3,ARAP2,AREG,AREGB,ARFGAP3,ARHGAP21,ARHGAP6,ARHGEF2,ARHGEF3,ARID5B,ARL13B,ARL15,ARL4C,ARL8A,ARNTL,ARPP19,ARSI,ATF1,ATL1,ATP2C2,ATP6V0A1,ATP9A,AVPI1,AXIN1,B3GNT2,B4GALT4,BACH1,BBS10,BBS9,BCAR1,BCAR3,BCL10,BCL2…
MSigDB Perturbation	FEVR_CTNNB1_TARGETS_UP	Genes up-regulated in intestinal crypt cells upon deletion of CTNNB1 [GeneID=1499].	8	1.25406e-09	4.21867e-06	5.27333e-07	1.4928	151.393	226	4620	0.0987762	0.0489178	134	641	667	5,10,11,16,24,31,51,74,75,82,84,92,101,125,135,157,172,178,183,187,207,208,211,226,230,233,235,239,241,248,249,261,270,278,279,280,301,304,308,310,318,347,351,360,394,407,423,440,449,485,495,508,514,526,534,546,548,549,552,554,555,556,560,564,586,588,590,593,595,622,625,630,634,640,652,660,662,667,676,682,701,702,709,720,728,732,742,749,754,756,763,772,780,789,793,803,829,838,850,870,904,944,948,…	5,10,11,16,24,31,51,74,75,82,84,92,101,125,135,157,172,178,183,187,207,208,211,226,230,233,235,239,241,248,249,261,270,278,279,280,301,304,308,310,318,347,351,360,394,407,421,423,440,449,485,495,508,514,526,534,546,548,549,552,554,555,556,560,564,586,588,590,593,595,611,622,625,630,634,640,652,660,662,667,676,682,701,702,709,720,728,732,742,749,754,756,763,771,772,780,789,793,803,829,838,850,870,…	ABHD2,ABR,ACER3,ADM,ADRBK1,AGPAT4,ANGPTL4,ANK3,APBA3,ARFGAP3,ATF3,ATP11B,ATP2A3,B3GNT3,BCL6,BHLHE40,BLOC1S5,BST1,C17orf85,CA13,CCL5,CDC42BPB,CDKN1A,CDS1,CEBPB,CHD2,CLIC5,CLSTN1,CORO2A,COTL1,CPB1,CREB3,CTGF,CTSB,CYP27A1,CYTH1,DAP,DOCK5,DPP4,DUSP6,EEPD1,EFNB2,EIF2AK3,FAAH,FAM134B,FAM213A,FAM53B,FDFT1,GADD45A,GADD45G,GCLC,GFI1,GHDC,GNPDA1,GPR35,GSDMC,GSR,GUCA2B,HIF1A,HLA-DMB,HMGCS1,HOXA5,HSD17B6,IL1…	ABCA3,ABCA7,ABCB1,ABCB10,ABCD1,ABHD2,ABLIM1,ABR,ACACB,ACAP1,ACE,ACE2,ACER3,ACKR4,ACOX1,ACTA1,ACYP2,ADK,ADM,ADPRM,ADRBK1,AGPAT3,AGPAT4,AGR2,AKR1B15,ALDH1A1,AMN,AMY2A,ANGPTL4,ANK3,ANXA2,AOC1,AP2A2,AP3M1,AP3M2,AP5M1,APBA3,APLNR,APOA1,APOBEC1,APOC3,APOL3,AQP11,AQP7,ARFGAP3,ARIH1,ASPA,ATF3,ATF5,ATOH1,ATP11B,ATP2A3,ATP2C2,ATP5A1,ATP6V0A2,ATP8A1,B3GALT4,B3GALT5,B3GNT3,BACE2,BCL6,BCO2,BCR,BHLHE40,BLOC1S5…
MSigDB Perturbation	SANSOM_APC_TARGETS_DN	Top genes down-regulated at day 5 of Cre-Lox induced APC [GeneID=324] knockout in the intestine.	9	4.04127e-09	1.35948e-05	1.51054e-06	1.67891	81.0051	136	2472	0.0594406	0.0550162	80	352	362	5,10,25,26,31,46,47,70,78,81,82,87,118,125,135,157,181,187,211,233,270,275,277,298,300,310,350,416,417,441,453,463,526,530,534,539,577,586,602,614,640,669,682,683,685,725,738,789,843,848,867,869,887,904,921,922,988,1033,1059,1066,1069,1074,1081,1086,1114,1186,1234,1245,1255,1288,1365,1376,1432,1491,1505,1527,1537,1547,1560,1570,1579,1583,1596,1629,1631,1666,1688,1720,1742,1749,1752,1779,1800,1890…	5,10,25,26,31,46,47,70,78,81,82,87,118,125,135,157,181,187,211,233,270,275,277,286,298,300,310,350,416,417,430,441,453,463,526,530,534,539,577,586,602,606,614,640,669,682,683,685,725,738,789,843,848,852,867,869,887,904,921,922,988,1033,1059,1066,1069,1074,1081,1086,1114,1186,1234,1245,1255,1288,1365,1376,1432,1491,1505,1527,1532,1537,1547,1560,1570,1578,1579,1583,1591,1596,1629,1631,1651,1666,168…	ABR,ACP5,ADAM19,ADIPOR2,ANK3,ATP2A3,ATP6V0E2,BARX2,C19orf12,C4A,CAPN3,CASP7,CCL5,CCR9,CD53,CYB5A,EVI2A,FAM213A,GABRB1,GALM,GIMAP4,GNPDA1,GNS,GPR12,HIC1,HLA-DMB,IKBKE,IL18,INPP5D,IRF1,IRF4,ITGAE,ITGAX,ITGB7,LPGAT1,LTB4R,MEIS2,MERTK,MGST2,MINOS1-NBL1,MOCS1,MTF2,MXI1,NAPSA,NDFIP2,NFIA,NPR3,NUB1,NUMB,PAPSS2,PDE9A,PEPD,PIK3CD,PLEKHO1,PPARA,PRLR,RASSF2,RGS10,RRAGD,SEC14L1,SEL1L,SEPT4,SIPA1,SLC2A5,SLC35…	AADAC,AAMDC,ABCB9,ABCC2,ABCC3,ABCD1,ABHD8,ABR,ACAA1,ACE,ACOT13,ACOX1,ACP5,ACY3,ADAM19,ADCK1,ADIPOR2,ADORA2B,AGR2,ALB,ANK3,ANXA6,AOC1,ARG2,ARHGDIB,ARSA,ATP1B1,ATP2A3,ATP6V0A1,ATP6V0A2,ATP6V0B,ATP6V0E2,BARX2,BASP1,BMP4,BPHL,BTD,C19orf12,C4A,CA4,CAPN3,CAPN9,CASP1,CASP3,CASP6,CASP7,CCK,CCL25,CCL5,CCNA1,CCR9,CD160,CD2,CD22,CD28,CD302,CD3D,CD3E,CD3G,CD48,CD5,CD52,CD53,CD6,CD7,CD70,CD72,CD79A,CD79B,CD82…
MSigDB Perturbation	VARELA_ZMPSTE24_TARGETS_UP	Top genes up-regulated in liver tissue from mice with knockout of ZMPSTE24 [GeneID=10269].	10	6.79477e-09	2.28576e-05	2.28576e-06	2.80613	14.2545	40	435	0.0174825	0.091954	14	38	38	6,15,17,42,113,128,145,172,174,210,265,290,306,332,360,419,447,481,509,605,662,676,715,744,754,1130,1134,1262,1426,1433,1485,1530,1534,1576,1865,1939,1986,2032,2385,2547	6,15,17,42,113,128,145,172,174,210,265,286,290,306,332,360,419,430,447,481,509,605,662,676,715,744,754,1130,1134,1262,1426,1433,1485,1530,1534,1576,1658,1865,1939,1986,2032,2385,2547,2924,3068,3082,3152,3289,3335,3970,4822,4907,4922,5068,5211,5311,5329,5466,5518,5600,5724,5812,5894,5985,6525,6564,6570,6752,7106,7295,7488,7548,7950,7957,7989,7991,7992,8096,8176,8320,8622,8652,9206,9224,9275,9355,9…	ADARB1,ATF3,BAIAP2,CDKN1A,CYP26A1,DDIT4,GADD45A,GADD45G,KIAA0247,KLF3,MYC,RGS16,TNFRSF1B,ZFP36L2	ADARB1,ATF3,ATF4,BAIAP2,BCL2L1,BTG2,CD14,CDKN1A,CIRBP,CRCP,CSNK1D,CUX2,CYP26A1,DDIT4,ERF,GADD45A,GADD45B,GADD45G,HIST1H1C,KIAA0247,KLF3,LEPR,MAPKAPK2,MKNK2,MYC,NCDN,NR1D1,PI4K2A,PIM3,RGS16,SESN1,SLC20A1,SLC25A51,TIPRL,TNFRSF1B,TXNIP,ZBTB16,ZFP36L2
MSigDB Perturbation	BERENJENO_TRANSFORMED_BY_RHOA_REVERSIBLY_UP	Genes up-regulated in NIH3T3 cells (fibroblasts) transformed by expression of contitutively active (Q63L) form of RHOA [GeneID=387] off plasmid vector; their expression reverted completely after treatment with Y27632 [PubChem=123862], an inhibitor of ROCK proteins.	11	8.0921e-09	2.72218e-05	2.47471e-06	4.99841	3.80121	19	116	0.0083042	0.163793	3	8	8	1.51131e+59	15,113,128,131,145,174,185,210,217,332,414,419,736,871,948,1374,1401,1576,2233,2469,3136,3260,3374,5636,5892,5956,6582,7440,7992,8579,8844,10418,11363,12399,12893,13195,14191,14277,15674,16044,19306,19658,23223,23536,24688,24802,24840,25802,26421,26443,26694,27389,28254,28871,29417,29809,30551,30731,32983,33086,34365,34696,35074,36363,37227,37398,37932,38276,38385,38673,40066,41207,41457,41546,43…	DAP,PIK3R1,TNFRSF1B	DAP,DNM1,GSTA4,MGST3,MT2A,PIK3R1,SQSTM1,TNFRSF1B
MSigDB Perturbation	DAUER_STAT3_TARGETS_UP	Top 50 genes up-regulated in A549 cells (lung cancer) expressing STAT3 [GeneID=6774] off an adenovirus vector.	12	8.9007e-09	2.99419e-05	2.49516e-06	2.53407	18.5473	47	566	0.020542	0.0830389	21	50	50	7.51102e+157	75,110,153,169,208,239,241,278,289,328,420,440,449,461,467,485,499,504,508,525,560,564,622,677,699,709,813,861,978,1273,1450,1555,1556,1640,1845,1852,1910,1955,1986,2088,2098,2175,2337,2484,2486,2495,2607,2763,2771,2828,2869,2898,3028,3099,3114,3155,3188,3266,3286,3400,3520,3532,3539,3593,3594,3681,3707,3725,3762,3770,3798,3843,3983,4006,4061,4087,4092,4316,4525,4752,4846,4922,4977,5011,5038,5056…	ADM,AKAP12,ATF3,BCL6,CTSB,EFNB2,FEM1C,FGG,FLNB,KLF11,MAFF,NPC1,PFKFB3,PPAP2B,SFN,SLC2A14,SLC2A3,SLC4A7,THBS1,TRIB1,UGCG	ABCA1,ADM,AGT,AKAP12,AKAP2,ATF3,BCL3,BCL6,C3,CCL2,CEBPD,CTSB,DUSP5,EFNA1,EFNB2,FEM1C,FGA,FGB,FGG,FLNB,FOSL1,GFPT2,HEG1,ICAM1,IGFBP1,JUN,KLF11,LBP,LDLR,MAFF,NPC1,PALM2-AKAP2,PFKFB3,PLIN3,PPAP2B,SAMD4A,SERPINB3,SFN,SLC2A14,SLC2A3,SLC4A7,SOCS3,SOD2,STAT2,STAT3,TEAD4,THBS1,TRIB1,UGCG,ZFP36
MSigDB Perturbation	ABE_VEGFA_TARGETS	Genes most profoundly induced in HUVEC cells (endothelium) by VEGFA [GeneID=7422].	13	1.57401e-08	5.29498e-05	4.07306e-06	4.19603	5.24305	22	160	0.00961539	0.1375	7	19	19	21,33,86,153,169,171,216,307,396,420,467,473,599,778,782,787,1106,1990,2088,2467,2484,2607	21,33,86,153,169,171,216,307,396,420,467,473,599,778,782,787,1106,1990,2088,2467,2484,2607,2939,3593,3873,4472,4689,4929,5288,5432,5520,5889,6597,6653,7355,7428,7528,7588,9291,9554,9583,9812,9950,10271,11041,11051,11056,11124,11328,11496,11642,12164,12279,12402,13958,14992,15209,15245,15545,15614,15658,15660,15721,16390,16999,17004,17391,17542,18076,18145,18421,18613,19653,19654,21403,21937,22997…	ANGPT2,BPI,HBEGF,PPAP2B,RCAN1,SLC4A7,THBD	A2M,ACE,ANGPT2,BPI,CD1B,EGR2,EGR3,HBEGF,HERPUD1,MCM2,MRE11A,PCTP,PODXL,PPAP2B,PPY,PTGS2,RCAN1,SLC4A7,THBD
MSigDB Perturbation	GRAESSMANN_APOPTOSIS_BY_DOXORUBICIN_UP	Genes up-regulated in ME-A cells (breast cancer) undergoing apoptosis in response to doxorubicin [PubChem=31703].	14	2.65362e-08	8.92677e-05	6.37626e-06	1.35375	227.516	308	6943	0.134615	0.0443612	185	1073	1107	5,11,14,21,25,26,33,40,41,45,48,61,67,68,75,76,77,82,86,94,104,105,110,112,114,115,119,125,127,135,136,152,157,171,211,213,214,216,225,233,239,240,241,246,248,260,271,278,293,297,300,307,308,320,321,341,347,350,361,367,377,378,380,382,386,390,402,407,412,422,435,439,440,441,442,452,457,459,462,463,464,473,476,482,485,499,503,504,508,510,517,523,533,534,548,552,555,556,560,564,581,599,604,605,614,…	5,11,14,21,25,26,33,40,41,45,48,61,67,68,75,76,77,82,86,94,104,105,110,112,114,115,119,125,127,135,136,152,157,171,211,213,214,216,224,225,233,239,240,241,246,248,260,271,278,293,297,300,307,308,320,321,341,347,350,361,367,377,378,380,382,386,390,402,407,412,422,435,438,439,440,441,442,452,457,459,462,463,464,473,476,482,485,499,503,504,508,510,517,523,533,534,548,552,555,556,560,564,581,599,604,…
54125,54131,54134,54140,54164,54191,54199,54213,54230,54236,54237,54238,54240,54244,54245,54249,54263,54285,54295,54315,54320,54332,54355,54358,54366,54371,54374,54377,54379,54380,54383,54387,54402,54406,54411,54418,54464,54491,54492,54500,54507,54515,54523,54529,54530,54542,54550,54551,54593,54597,54635,54642,54661,54676,54678,54686,54688,54704,54720,54738,54742,54755,54765,54769,54776,54781,548…	ACAD9,ACADVL,ACSL1,AGPAT5,AGPAT6,AGTPBP1,AHR,ALAS1,ANKRD17,ARAP2,ARNTL,ARPP21,ATF3,ATOX1,ATP6V0C,ATP6V0E2,ATP6V1C1,BAIAP2,BCL2L11,BTG1,C12orf44,C14orf166,C19orf12,CABYR,CASQ2,CCNG1,CD55,CDC42EP3,CDKN1A,CHAC1,CHCHD10,CITED2,CLEC4G,CORO2A,COTL1,CSF1,CTSB,DDIT4L,DDR1,DNAJA1,DOPEY2,DRAM1,DRAP1,DUSP6,EED,EFNB2,ELF3,ENDOD1,ETFDH,EVI2A,EXTL1,FAM101B,FBXL20,FRMD8,FUCA1,FYTTD1,FZD7,GADD45A,GALM,GALNT3,GCH…	AAMDC,ABCB10,ABHD4,ABHD5,ABTB1,ACAD11,ACAD8,ACAD9,ACADSB,ACADVL,ACER2,ACOT6,ACOX2,ACOX3,ACSL1,ACTR1B,ADA,ADAM15,ADAM8,ADAMTS15,ADAMTS4,ADAMTS7,ADRB2,AEN,AGPAT5,AGPAT6,AGTPBP1,AHCYL2,AHNAK,AHR,AK1,AK4,AKR1B1,ALAD,ALAS1,ALDH1A1,ALDH1L1,ALDH2,ALDH4A1,ALKBH4,ALOX12,ALOXE3,AMPD2,ANGPT4,ANGPTL2,ANKRD17,AOX1,AP4S1,APAF1,APOBEC1,APOF,APOH,AQP1,ARAP1,ARAP2,AREG,AREGB,ARHGAP27,ARHGAP39,ARL16,ARNTL,ARPP21,A…
MSigDB Perturbation	BOQUEST_STEM_CELL_CULTURED_VS_FRESH_UP	Genes up-regulated in cultured stromal stem cells from adipose tissue, compared to the freshly isolated cells.	15	2.90883e-08	9.78529e-05	6.52353e-06	1.45644	145.56	212	4442	0.0926573	0.0477262	100	412	419	3,7,8,18,21,31,32,60,64,74,76,79,89,104,107,108,110,119,131,136,137,140,152,154,171,173,183,185,204,217,218,219,226,235,252,253,267,271,274,279,280,294,307,321,328,333,360,406,414,423,425,441,461,473,481,498,499,504,510,537,544,563,586,599,605,615,630,650,666,677,691,696,699,705,718,719,733,735,736,742,778,793,825,832,834,838,861,871,880,912,914,928,935,942,953,956,958,965,966,978,987,1065,1079,1…	3,7,8,18,21,31,32,60,64,74,76,79,89,104,107,108,110,119,131,136,137,140,152,154,171,173,183,185,204,217,218,219,226,235,252,253,267,271,274,279,280,286,294,307,321,328,333,360,406,414,423,425,430,438,441,461,473,481,498,499,504,510,537,544,563,586,599,605,615,630,638,650,666,677,688,691,696,699,705,718,719,724,733,735,736,742,745,778,793,825,832,834,838,861,871,880,884,912,914,928,932,935,942,949…	ADAMTSL3,ADH1B,AGTR1,AKAP13,ALCAM,ANGPTL4,ANK2,ANO1,ATF3,BHLHE40,BMP2,C1QTNF3,CD34,CD44,CD83,CDC42EP3,CLIC3,COL15A1,CYP26B1,DCLK1,DCN,DKK1,DKK2,EIF1,ELOVL5,EMP2,ESR1,FGF2,FOXO1,GADD45G,GDF10,GDF15,HAPLN1,HBEGF,HNRNPM,IGF1,IRF1,ITGA4,KCNK2,KLF11,KLF4,KLF6,LOXL2,LRP1B,MAFB,MAN1A1,MAOA,MATN2,MELK,MET,METTL7A,MOXD1,MTSS1,MYC,MYO10,NAMPT,NEK7,NINJ2,NPR3,NRIP1,NTRK2,OLFML2A,PAPPA,PAPSS2,PDLIM5,PFKFB3,P…	A2M,ABCA6,ABCC4,ABI3BP,ACACB,ACAN,ACKR3,ACLY,ACSL5,ACTC1,ADAM10,ADAM12,ADAM22,ADAMTSL3,ADH1B,AEBP1,AGTR1,AIMP2,AKAP13,AKR1C1,ALCAM,ANG,ANGPTL2,ANGPTL4,ANK2,ANO1,AOC3,AP2S1,APOC1,APOE,APOL3,APOLD1,ARHGAP6,ARHGDIB,ASNS,ASPA,ASPM,ATF3,ATF5,ATP8A1,ATP8B4,BAX,BCHE,BHLHE40,BMP2,BST2,BTG2,C10orf10,C12orf5,C1QTNF3,C6,C8orf4,CALU,CAPN6,CBS,CCL2,CCL8,CCNL1,CD302,CD34,CD44,CD83,CD9,CDC42EP3,CDH2,CDK1,CDK7,C…
MSigDB Perturbation	AMIT_EGF_RESPONSE_480_HELA	Genes whose expression peaked at 480 min after stimulation of HeLa cells with EGF [GeneID=1950].	16	6.34756e-08	0.000213532	1.33458e-05	1.83606	47.384	87	1446	0.0380245	0.060166	46	157	163	11,21,49,65,84,104,115,119,121,153,171,191,194,230,288,307,321,420,473,526,599,616,650,654,687,705,712,726,778,825,829,836,851,907,931,961,982,1008,1047,1099,1106,1130,1159,1205,1221,1241,1274,1322,1347,1407,1432,1443,1460,1465,1494,1505,1518,1520,1561,1572,1621,1629,1640,1790,1797,1869,1873,1946,2065,2088,2126,2179,2198,2202,2224,2256,2272,2309,2467,2484,2502,2513,2570,2590,2607,2636,2708	11,21,49,65,84,104,115,119,121,153,171,191,194,230,288,307,321,420,473,526,599,616,637,638,650,654,687,705,712,726,762,778,825,826,829,836,851,907,931,961,982,1008,1047,1063,1087,1094,1099,1106,1107,1130,1159,1205,1221,1235,1241,1268,1274,1322,1347,1407,1432,1443,1453,1460,1465,1487,1494,1505,1518,1520,1561,1572,1621,1629,1640,1786,1790,1797,1869,1873,1946,2023,2065,2088,2101,2106,2126,2179,2198,…	ABHD2,ACTN1,ARHGEF18,ARHGEF2,BCAR3,CD44,CHST11,COL4A2,CTNNB1,CYB561,DCLK1,DUSP4,DUSP7,FST,GLRX3,GMDS,HBEGF,HEBP2,HMGA1,HPCAL1,ITGA5,ITGA6,ITGB5,KRT17,LY6E,MAD1L1,NEDD9,NUDT4,PDLIM5,PHC2,PICALM,PPAP2B,PPIF,PTGS1,RELA,SEPT9,SERPINE1,SERPINE2,SFN,SLC1A5,SPHK1,TBC1D2,TGM2,TNFRSF21,TSPAN14,ZFP36L2	ABHD2,ACTC1,ACTN1,AGRN,AMIGO2,ARHGEF18,ARHGEF2,B4GALT1,BCAR3,BCL2L1,BIN1,BRD2,C9orf114,CAMSAP1,CAMTA2,CCND1,CCND3,CD44,CDV3,CDYL,CHST11,COL4A1,COL4A2,CTNNB1,CYB561,DAPK3,DCLK1,DGAT1,DHPS,DIAPH1,DLGAP4,DUSP4,DUSP7,EFHD2,EGFR,EGLN1,EHD1,ENC1,ENSG00000258947,ERCC1,EXT1,FAM214B,FAM50B,FGFR1,FOXD1,FST,FXR2,GABPB1,GAK,GLRX3,GMDS,GPAA1,GPRC5A,GRAMD1B,H2AFX,HBEGF,HEBP2,HMGA1,HMGXB3,HOMER3,HPCAL1,IGFBP4,I…
MSigDB Perturbation	VERHAAK_GLIOBLASTOMA_NEURAL	Genes correlated with neural type of glioblastoma multiforme tumors.	17	2.14597e-07	0.000721903	4.24649e-05	1.66482	65.4725	109	1998	0.0476399	0.0545546	57	210	211	6,15,17,32,42,67,73,96,110,113,123,128,145,150,174,192,210,218,265,270,278,332,347,396,401,404,419,425,432,447,499,504,512,560,562,625,643,677,709,715,744,806,896,914,921,942,973,1003,1012,1031,1061,1132,1134,1190,1241,1253,1262,1272,1347,1351,1354,1366,1367,1431,1452,1458,1520,1576,1626,1695,1727,1765,1767,1777,1898,1910,1931,1979,2010,2107,2133,2141,2165,2184,2294,2323,2328,2343,2395,2413,2435,…	6,15,17,32,42,67,73,96,110,113,123,128,145,150,174,192,210,218,265,270,278,332,347,396,401,404,419,425,432,447,499,504,512,560,562,625,643,677,709,715,744,806,830,896,914,921,942,973,1003,1012,1031,1061,1087,1117,1132,1134,1190,1241,1253,1262,1272,1347,1351,1354,1366,1367,1431,1452,1458,1520,1576,1585,1626,1645,1695,1727,1765,1767,1777,1876,1898,1909,1910,1931,1979,2010,2107,2133,2141,2165,2184,2…	AMPD3,ANKRD46,BAI3,CCR5,CD2AP,CEBPB,COL5A1,COL8A2,CTSB,CTSC,CTSZ,DCBLD2,DKK1,DPF1,DSE,EHBP1L1,ELF4,FXYD5,ITGA4,ITGA5,ITGAM,KLF12,LHFPL2,LILRB2,LILRB3,LNPEP,MAN1A1,MARCKSL1,MGAT1,MPPED2,MYH9,MYO1F,MYOF,NCALD,NPC2,NRP2,NRXN1,PHLPP1,PIK3CD,RBM47,RBMS1,RHBDF2,RUFY3,RUNX1,SERPINE1,SH2B3,SIGLEC7,SLC10A3,ST14,ST3GAL1,TGFBR2,THBD,THBS1,TNFAIP3,TNFRSF1B,VDR,WIPF1	ABL2,ACPP,ADAM12,AIM1,ALDH3B1,ALOX5,AMPD3,ANKRD46,APOBEC3C,APOBR,ARHGAP4,ARPC1B,ASCL1,BAI3,BATF,BCAN,BDKRB2,BEX1,BNC2,C5AR1,CASP4,CASP5,CAST,CCR5,CD2AP,CDCP1,CDK5R1,CEBPB,CHPF2,CKB,CLASP2,CLCF1,CLEC2B,CNN2,COL1A1,COL1A2,COL5A1,COL8A2,COLGALT1,CRB1,CSPG5,CSTA,CTSB,CTSC,CTSZ,CYTH4,CYTIP,DAB2,DCBLD2,DKK1,DLL3,DOK3,DPF1,DSE,EHBP1L1,ELF4,ENG,F13A1,FCGR2A,FCGR2B,FES,FGR,FHL2,FHOD1,FMNL1,FNDC3B,FOSL1,FO…
MSigDB Perturbation	KLEIN_PRIMARY_EFFUSION_LYMPHOMA_UP	Genes up-regulated in AIDS-related primary effusion lymphoma (PEL) samples compared to other tumor subtypes and normal B lymphocytes.	18	4.10098e-07	0.00137957	7.66428e-05	2.50914	14.7461	37	450	0.0161713	0.0822222	13	50	51	39,81,94,143,153,335,420,648,663,713,820,921,969,996,1033,1148,1261,1299,1325,1350,1573,1620,1770,1889,1893,2016,2063,2088,2132,2316,2349,2448,2471,2484,2521,2607,2705	39,81,94,143,153,335,420,648,663,713,820,921,969,996,1033,1148,1261,1299,1302,1325,1350,1573,1620,1770,1889,1893,1905,2016,2063,2088,2132,2316,2349,2448,2471,2484,2521,2607,2705,2802,2859,2894,3114,3238,3629,3643,3753,3759,3881,4091,4180,4250,4278,4423,4516,4647,4660,4920,5056,5101,5213,5269,5288,5345,5354,5436,5469,5506,5520,5604,5766,5940,5942,6003,6236,6367,6390,6480,6574,6630,6642,7052,7145,7…	CASP7,GTF3C1,GUSB,ILF3,IRF4,LTA4H,NCOR2,PAM,PPAP2B,PRDM1,PTP4A3,VDR,VEGFA	ADAM15,AGPAT2,ALDH1L1,ALG3,AQP3,ATP2A2,BCAP31,CASP7,CFI,CTRL,DAZL,DHX30,DPY19L1,EIF4A1,GANAB,GLDC,GPAA1,GPI,GTF3C1,GUSB,GZMA,HSPA4L,IL10,IL2RB,ILF3,IQGAP2,IRF4,LDLR,LTA4H,MUC1,NCOR2,NFIB,P4HA1,PAM,PLOD1,PPAP2B,PRDM1,PTP4A3,RABGGTA,RPN2,SELPLG,SRGAP2,SULT1A1,TFPI,TNFRSF8,TPO,VARS,VDR,VEGFA,ZMYM3
MSigDB Perturbation	IVANOVA_HEMATOPOIESIS_MATURE_CELL	Genes in the expression cluster 'MBC Shared': up-regulated in mature blood cell populations from adult bone marrow and fetal liver.	19	4.26863e-07	0.00143597	7.55773e-05	1.59504	75.8603	121	2315	0.0528846	0.0522678	76	274	277	8,35,40,43,76,96,110,112,172,212,214,220,256,278,313,350,388,417,468,498,499,504,520,552,560,569,646,662,672,676,677,684,709,749,752,754,824,848,851,861,867,872,882,915,938,965,1031,1035,1047,1048,1058,1061,1085,1152,1164,1193,1200,1242,1259,1269,1287,1288,1290,1353,1354,1426,1486,1506,1514,1530,1550,1553,1594,1637,1691,1696,1710,1714,1724,1805,1819,1868,1873,1881,1894,1904,1910,1927,1981,1988,20…	8,35,40,43,76,96,110,112,172,212,214,220,224,256,278,313,350,388,417,468,498,499,504,520,552,560,569,606,646,662,672,676,677,684,709,749,752,754,775,824,830,848,851,861,867,872,882,898,911,915,938,965,1031,1035,1047,1048,1058,1061,1085,1098,1152,1164,1193,1200,1242,1259,1269,1287,1288,1290,1353,1354,1426,1486,1506,1514,1530,1550,1553,1559,1586,1594,1637,1691,1696,1710,1714,1724,1739,1753,1805,181…	ABCA13,ACP5,ACSL1,ALAS2,AMPD3,BNIP3L,C1GALT1,CDC42EP3,CLIC6,CPD,CTSB,DAAM1,DCAF12,EHBP1L1,EMR1,ENDOD1,GADD45A,GAPVD1,GTF2A1,HGSNAT,ITGAM,KLF11,KLF3,LAMP2,LBR,LGMN,LIMS1,LMTK2,LPCAT1,LPHN3,LRG1,LYVE1,MAP4K5,MTSS1,MXI1,NAAA,NINL,NR3C1,NUDT4,NUP50,OTUB2,OTUD5,PICALM,PIK3CB,PLA2G2F,PRPF18,RAB11FIP4,RAB24,RBMS1,RHOU,RNF19A,SLC1A5,SLC30A10,SLC4A1,SMOX,SNCA,SPECC1,SRI,ST3GAL5,ST3GAL6,STAB2,STX11,SYNJ1,T…	AAK1,ABCA13,ABCB6,ACP1,ACP5,ACSL1,ACTA2,ADD1,ADIPOR1,AGFG1,ALAS2,AMPD3,ANO10,AP2A2,AP5S1,ARHGAP19,ARHGAP19-SLIT1,ARL2BP,ARL6IP1,ASNS,ASPRV1,ATG4A,ATP6V0A1,ATP6V1E1,ATP8A1,BMP2K,BMPR1A,BNIP3L,BPGM,BRMS1,C11orf24,C15orf48,C18orf8,C1GALT1,C1QB,C3,C4orf3,C5orf30,C7orf73,CAST,CCDC109B,CCDC61,CCNA2,CCND3,CCP110,CCRN4L,CD14,CDC42EP3,CDCA3,CDK8,CDKN3,CDR2,CELA1,CES3,CHP1,CIR1,CLIC6,CMAS,COL1A1,COLEC12,CP…
MSigDB Perturbation	SHEDDEN_LUNG_CANCER_GOOD_SURVIVAL_A12	Cluster 12 of method A: up-regulation of these genes in patients with non-small cell lung cancer (NSCLC) predicts good survival outcome.	20	4.69906e-07	0.00158077	7.90383e-05	1.63349	67.3404	110	2055	0.0480769	0.053528	61	261	277	51,54,70,89,97,102,106,143,148,201,223,251,267,275,277,323,378,403,409,429,460,493,496,514,538,546,576,636,649,652,666,687,714,748,755,789,837,859,886,919,945,971,1017,1040,1045,1046,1153,1154,1172,1195,1213,1219,1230,1261,1291,1321,1338,1378,1389,1432,1459,1460,1505,1594,1605,1611,1629,1699,1720,1761,1790,1825,1836,1843,1889,1922,1960,2016,2082,2132,2151,2152,2157,2174,2193,2218,2256,2258,2276,2…	51,54,70,89,97,102,106,143,148,201,223,251,267,275,277,323,378,403,409,429,460,493,496,514,538,546,576,636,649,652,666,687,710,714,748,755,762,789,837,859,868,886,919,945,971,1017,1040,1045,1046,1149,1153,1154,1172,1195,1209,1213,1219,1230,1261,1291,1321,1338,1378,1389,1402,1432,1459,1460,1505,1594,1605,1611,1629,1670,1699,1720,1761,1790,1825,1827,1836,1843,1889,1922,1960,2016,2082,2093,2132,2151…	ADCY9,ALAS2,ARHGAP17,ATP2A3,BBOX1,BCL2,CACNA1A,CCND2,CD180,CD300A,CD38,CHST11,DENND5B,DPYSL4,DTNB,FAM69A,FFAR2,GABRR1,GAST,GJA3,GPR126,IFNAR2,IL5RA,IRAK3,IRF4,KAT6B,KCNN3,LAX1,MED13L,MRPS31,NANS,NEBL,NOS1,NXPH3,PAX5,PCYT1B,PDK1,PLA2G2A,PNOC,PRDM1,RFPL3,RHOH,RHOQ,RYBP,SEC14L1,SEL1L,SEL1L3,SKAP1,SLC26A4,SLC2A5,SLC6A13,SLC6A2,SNN,SSR3,STXBP6,TRAPPC9,TRIM31,TTLL4,UBE2J1,ZER1,ZFP36L1	ABCA12,ABCC3,ADAMDEC1,ADCY9,ADORA3,ALAS2,AMN,AOX1,APOA2,APOBEC3F,AQP6,ARHGAP17,ARTN,ASCL3,ATF5,ATP2A3,ATP6V0A1,BASP1,BBIP1,BBOX1,BCL2,BTG2,C16orf3,C19orf57,C1QL1,C1RL,C22orf24,CACNA1A,CACNA1F,CAMKMT,CAPN6,CCND2,CD180,CD19,CD300A,CD38,CD79A,CDC42EP2,CEP135,CHST11,CHST2,CLTA,CMA1,CNR1,COL9A3,COMMD3,CRADD,CRISP1,CRYBB3,CSNK2A1,CTTN,CYBA,CYP2E1,CYTIP,DCAKD,DENND5B,DERL1,DIP2C,DLL3,DMXL2,DNAJB9,DNAJC1…
MSigDB Perturbation	NIKOLSKY_BREAST_CANCER_7P15_AMPLICON	Genes within amplicon 7p15 identified in a copy number alterations study of 191 breast tumor samples.	21	4.93215e-07	0.00165918	7.90084e-05	16.6454	0.360459	6	11	0.00262238	0.545454	4	6	11	4.24871e+18	4.24871e+40	HOXA1,HOXA3,HOXA4,HOXA5	HOXA1,HOXA13,HOXA2,HOXA3,HOXA4,HOXA5
MSigDB Perturbation	JOHNSTONE_PARVB_TARGETS_3_UP	Genes up-regulated upon overexpression of PARVB [GeneID=29780] in MDA-MB-231 cells (breast cancer) cultured in 3D Matrigel only.	22	5.36646e-07	0.00180528	8.2058e-05	1.45676	119.443	174	3645	0.076049	0.0477366	91	414	420	6,10,17,21,42,45,47,60,67,83,87,110,120,122,133,149,173,180,187,226,245,265,278,279,289,290,300,307,309,347,354,371,396,407,417,422,423,434,447,449,457,461,466,471,473,499,504,509,510,516,525,526,530,544,560,567,572,584,620,625,628,640,646,650,658,672,673,677,683,702,709,715,718,721,742,744,767,778,804,831,847,904,916,922,978,988,1000,1027,1048,1059,1106,1134,1139,1153,1154,1163,1180,1221,1248,12…	6,10,17,21,42,45,47,60,67,83,87,110,120,122,133,149,173,180,187,226,245,265,278,279,289,290,300,307,309,347,354,371,396,407,417,422,423,434,447,449,457,461,466,471,473,499,504,509,510,516,525,526,530,544,560,567,572,584,620,625,628,637,638,640,646,650,658,672,673,677,683,702,709,715,718,721,724,742,744,767,778,804,831,845,847,862,863,904,916,922,934,949,978,988,1000,1005,1027,1048,1059,1060,1106,…	ACADVL,ACKR6,ACSL1,ADD3,APLP2,ARAF,ARHGAP26,ATP2B4,ATP6V0C,B4GALT5,BHLHE40,BTG1,CALM1,CAPRIN1,CD55,CEBPB,CITED2,CLIC3,CPD,CRISPLD2,CSF1,CTSB,CTSD,DAAM1,DDIT4,DYNC1H1,EHD2,EPAS1,FAM213A,FLNB,FUT8,FXYD5,GNS,GOLGA5,GRK5,GSAP,HINT3,HPCAL1,IFI35,JAK1,KLF4,KLF6,KRT80,LGMN,LGR4,LIPG,LMTK2,LOXL2,MARCKS,MINOS1-NBL1,MYH9,MYOF,NDFIP1,NOTCH2,NPC2,PARP12,PHLDA1,PLD1,PPP1R21,PSAP,PTPN23,RAB7A,RAPGEF1,RBM47,REL…	ABCA1,ABCC3,ABCG2,ABHD12,ABHD14B,ABHD17C,ACADVL,ACKR6,ACLY,ACSL1,ACSL5,ACTB,ACY1,ADD3,AGRN,AHNAK,AHNAK2,AKR1C1,AKR1C2,AKR1C3,ALDH3A2,ALDH3B1,ANAPC5,ANXA1,ANXA4,APLP2,APOL6,AQP3,ARAF,AREG,AREGB,ARFGAP1,ARHGAP26,ARHGAP5,ARL4C,ARNT2,ARPC1B,ARRB1,ASAH1,ASXL2,ATG2A,ATL1,ATM,ATP1A1,ATP2B4,ATP6V0C,ATXN7,B4GALT5,BCL3,BCL9L,BHLHE40,BRI3,BTG1,BTN3A3,C19orf33,C1S,C3,C6orf120,CA12,CALD1,CALHM2,CALM1,CALM2,CA…
MSigDB Perturbation	GRAESSMANN_RESPONSE_TO_MC_AND_DOXORUBICIN_UP	Genes up-regulated in ME-A cells (breast cancer, sensitive to apoptotic stimuli) exposed to doxorubicin [PubChem=31703] in the presence of medium concentrate (MC) from ME-C cells (breast cancer, resistant to apoptotic stimuli).	23	5.86146e-07	0.00197179	8.57302e-05	1.43444	129.667	186	3957	0.0812937	0.0470053	105	572	598	5,11,21,25,26,61,67,68,75,77,82,86,94,114,115,119,125,127,135,157,211,213,214,216,233,239,241,246,248,260,278,293,297,300,307,308,320,341,347,361,367,377,380,382,386,412,435,440,441,452,459,464,473,482,485,503,508,517,533,534,552,555,556,560,564,581,614,615,622,625,628,644,647,650,682,698,709,749,757,778,782,787,792,805,825,836,842,869,912,913,922,938,969,982,988,996,1069,1082,1086,1106,1114,1159…	5,11,21,25,26,61,67,68,75,77,82,86,94,114,115,119,125,127,135,157,211,213,214,216,224,233,239,241,246,248,260,278,293,297,300,307,308,320,341,347,361,367,377,380,382,386,412,435,438,440,441,452,459,464,473,482,485,503,508,517,533,534,552,555,556,560,564,581,614,615,622,625,628,644,647,650,682,698,709,749,757,771,778,782,787,792,805,825,836,842,863,869,898,912,913,922,938,969,982,988,996,1069,1082…	AGPAT5,AGPAT6,AGTPBP1,ALAS1,ANKRD17,ARAP2,ARPP21,ATOX1,ATP6V0E2,BAIAP2,BCL2L11,CABYR,CASQ2,CCNG1,CD55,CDKN1A,CHAC1,CLEC4G,CORO2A,COTL1,CTSB,DDIT4L,DDR1,DOPEY2,DRAM1,EFNB2,ENDOD1,ETFDH,EXTL1,FBXL20,FRMD8,FUCA1,FZD7,GALM,GDF15,GLCCI1,GNS,GPHA2,GUSB,HGSNAT,HIST3H2A,HOXA5,ICMT,IDH1,IKBKE,IL15,IL18,INPP5D,ITGA6,KIAA0247,KLF17,KLF6,LACTB,LDLRAP1,LMO4,LPGAT1,LYNX1,MAFB,MDM2,NBEAL2,NFATC3,NPC2,NT5DC3,PDE…	AAMDC,ABCB10,ABHD4,ABHD5,ABTB1,ACAD11,ACAD8,ACER2,ACOT6,ACOX2,ADAM8,ADAMTS7,ADRB2,AGPAT5,AGPAT6,AGTPBP1,AHNAK,AK1,AK4,AKR1B1,ALAS1,ALDH1L1,ALDH2,ALDH4A1,ALKBH4,ALOX12,ALS2,AMPD2,ANGPT4,ANGPTL2,ANKRD17,AOX1,APAF1,APOBEC1,APOF,APOH,ARAP2,ARHGAP27,ARL16,ARPP21,ARVCF,ASS1,ATG3,ATOX1,ATP13A2,ATP6V0B,ATP6V0E2,ATP6V1D,BAIAP2,BCAR1,BCL2L11,BET1L,BMP1,BRIX1,BTG2,C1QTNF1,CABYR,CALHM2,CAMK2B,CAPG,CAPN10,CAR…
MSigDB Perturbation	BYSTRYKH_HEMATOPOIESIS_STEM_CELL_FLI1	Genes whose expression is coregulated with that of FLI1 [GeneID=2313] in hematopoietic stem cells (HSC).	24	6.19659e-07	0.00208453	8.68555e-05	7.44308	1.34353	10	41	0.00437063	0.243902	1	9	9	5,82,125,135,157,211,233,534,682,1800	5,82,125,135,157,211,233,534,682,1559,1800,3977,4695,5696,6867,7082,9980,11263,11684,12876,13268,18963,21573,27084,27429,27830,29557,30419,32990,36790,37998,45904,49589,49895,51413,56924,58840,60823,64093,67196,67953	HIC1	DBF4,FANCG,FLT3,HIC1,IFT27,IL1RL1,MYF6,RAB5B,TAP2
MSigDB Perturbation	SWEET_LUNG_CANCER_KRAS_UP	Genes up-regulated in the Kras2LA mouse lung cancer model with mutated KRAS [GeneID=3845].	25	1.24004e-06	0.00417148	0.000166859	1.45486	112.725	164	3440	0.0716783	0.0476744	97	468	492	23,32,89,96,97,104,110,122,134,150,171,193,218,278,282,288,300,321,351,356,381,382,390,413,425,426,434,450,452,499,504,510,514,526,544,560,597,599,603,620,636,652,662,669,673,677,701,705,709,718,725,734,735,742,767,780,781,796,804,808,843,846,847,851,882,885,914,916,922,930,942,948,952,959,966,971,986,988,1003,1012,1047,1070,1074,1086,1118,1152,1157,1186,1241,1253,1259,1263,1301,1382,1393,1441,14…	23,32,89,96,97,104,110,122,134,150,171,193,218,278,282,288,300,321,351,356,381,382,390,413,421,425,426,434,450,452,499,504,510,514,526,544,560,597,599,603,620,636,637,652,662,669,673,677,701,705,709,718,724,725,734,735,742,767,780,781,796,804,808,843,846,847,851,882,885,914,916,922,930,942,948,952,959,966,971,986,988,1003,1012,1047,1070,1074,1086,1118,1152,1157,1186,1189,1241,1253,1259,1263,1301,…	ACSL4,ACTN1,ADAM19,ADIPOR2,ANK3,ARL8B,ATOX1,ATP6V0C,ATP6V1C1,ATXN10,BHLHE40,BST1,BTG1,CCR5,CD44,CDKN1A,CEACAM1,CHIA,CHRNB1,CISD1,CITED2,CMIP,COL15A1,COTL1,CTSB,CTSC,CTSD,CTSZ,DAP,DLK1,DSC2,DUSP6,FAM162A,FAM213A,FAM49B,FMR1,FUCA1,GADD45A,GALNT3,GCH1,GJA1,GJA3,GNS,HIBADH,HIF1A,HK1,HLA-DMB,IL18,ITGA4,ITGA8,ITGAX,ITPR2,KCNK1,KIAA1524,KLF5,KRAS,LAS1L,LPCAT1,LRG1,MAN1A1,MDFI,MPEG1,MYCN,NAPSA,NPC2,NR2F1…	AASS,ACADL,ACE2,ACLY,ACSL4,ACSL5,ACTN1,ACTN4,ADAM19,ADCY7,ADIPOR2,ADSSL1,AES,AK1,ALDOA,ALDOC,ANK3,ANXA4,APEX1,APOC1,APRT,ARCN1,AREG,AREGB,ARF6,ARG1,ARG2,ARGLU1,ARL8B,ATOX1,ATP11A,ATP1A1,ATP1B1,ATP5F1,ATP5G1,ATP6V0A1,ATP6V0C,ATP6V1C1,ATXN10,AVPI1,AXIN1,AXL,AZIN1,B3GAT3,B4GALNT1,BASP1,BEX1,BEX4,BHLHE40,BMP4,BOP1,BRAF,BRD7,BRIX1,BSG,BST1,BTG1,C11orf34,C19orf10,C1QB,C5,C9orf16,C9orf91,CA8,CAMSAP1,CAP…
MSigDB Perturbation	BOQUEST_STEM_CELL_DN	Genes down-regulated in freshly isolated CD31- [GeneID=5175] (stromal stem cells from adipose tissue) versus the CD31+ (non-stem) counterparts.	26	1.30704e-06	0.00439688	0.000169111	1.59044	70.4207	112	2149	0.0489511	0.0521173	53	209	213	3,12,15,21,33,44,73,75,76,77,86,101,113,115,127,128,145,171,174,210,216,219,221,239,241,307,332,351,368,396,419,426,440,473,508,544,556,564,599,622,644,650,653,654,668,701,718,720,778,780,782,787,836,838,855,947,969,982,987,1008,1040,1056,1066,1070,1091,1106,1122,1135,1156,1221,1226,1227,1242,1245,1336,1421,1432,1505,1515,1520,1555,1570,1576,1606,1629,1637,1707,1714,1727,1779,1802,1828,1845,1929,…	3,12,15,21,33,44,73,75,76,77,86,101,113,115,127,128,145,171,174,210,216,219,221,239,241,307,332,351,368,396,419,426,440,473,508,544,556,564,599,601,622,637,644,650,653,654,668,701,710,718,720,778,780,782,787,836,838,855,868,898,947,969,982,987,1008,1026,1040,1056,1066,1070,1087,1091,1106,1122,1135,1156,1221,1226,1227,1242,1245,1336,1421,1432,1505,1515,1520,1555,1570,1576,1595,1606,1629,1632,1637,…	ACKR5,ADAMTS9,ANGPT2,BAALC,BCAR3,CAPN11,CD2AP,CD93,CDC42EP3,CHD7,CLIC5,CYTH1,DUSP6,EFNB2,EMCN,FNBP1L,GFOD1,GIMAP4,GIMAP6,HBEGF,ICA1,IL15,ITGA6,LIMK2,LMO2,MAST4,MCTP1,MECOM,MET,MGST2,MYO10,MYRIP,NEDD9,PGS1,PHLDA1,PRKCH,RASGRP3,RCAN1,S1PR1,SCARB1,SCUBE2,SEC14L1,SEMA6A,SH2B3,SOCS2,SRGN,STX11,TEX14,TGM2,THBD,TNFRSF1B,TPD52,UPP1	ABCG1,ABLIM3,ACKR5,ADAMTS9,ADRB2,ALDH1A2,ANGPT2,ANXA3,APLNR,APOLD1,AQP1,ARAP3,AREG,AREGB,ARHGEF15,BAALC,BCAR3,BST2,C1orf115,CA4,CAPN11,CARD10,CARD8,CD2AP,CD320,CD74,CD93,CDC42EP3,CDH5,CDK1,CFI,CFLAR,CHD7,CLDN5,CLEC1A,CLIC5,CREM,CSF2RB,CSF3,CTSH,CX3CL1,CYTH1,DARC,DNM3,DOCK9,DSG2,DUSP6,EFNA1,EFNB2,ELTD1,EMCN,ENDOU,ENG,ENPP4,EOGT,EPHB4,ERG,ETS2,F11R,FABP5,FLI1,FLT1,FNBP1L,G0S2,GATA2,GFOD1,GIMAP4,GIM…
MSigDB Perturbation	PARK_OSTEOBLAST_DIFFERENTIATION_BY_PHENYLAMIL_UP	Genes up-regulated in M2-10B4 cells (osteoblast) in response to phenylamil [PubChemID=4755].	27	1.42633e-06	0.00479818	0.00017771	3.78827	4.75151	18	145	0.00786713	0.124138	6	13	13	68,79,108,110,204,274,294,499,504,677,832,956,1079,1481,1561,1853,1910,2434	68,79,108,110,204,274,294,499,504,677,832,956,1079,1481,1561,1853,1910,2434,2816,2880,2960,3286,3647,3798,3896,4087,4131,4936,5122,5425,5742,6056,6881,7213,7367,7783,9131,9584,10193,10457,10547,10733,13038,13132,14370,14501,14817,15106,15292,17162,17611,17999,18014,19003,20491,20508,20931,21079,21134,21292,21545,21599,21662,21994,22132,22281,23845,24181,25459,25630,25691,26511,26531,27131,27493,2…	CHAC1,CYP26B1,FST,RGS3,SLC6A9,THBS1	ALDH1L2,CHAC1,CLDN1,COX6A2,CYP26B1,DLK2,FST,ISM1,RGCC,RGS3,SLC6A9,THBS1,TRIB3
MSigDB Perturbation	SMID_BREAST_CANCER_LUMINAL_B_DN	Genes down-regulated in the luminal B subtype of breast cancer.	28	1.48527e-06	0.00499646	0.000178445	1.39641	141.792	198	4327	0.0865385	0.0457592	117	516	542	33,49,51,79,84,88,89,96,97,104,108,115,127,148,150,153,158,173,195,202,204,205,219,223,248,263,267,270,274,282,294,297,321,328,335,356,373,383,386,397,399,403,417,420,425,460,482,493,510,514,522,533,546,561,563,574,577,581,592,630,642,644,645,652,666,675,684,713,719,735,739,791,793,800,804,806,829,832,836,866,867,885,906,916,930,940,956,958,961,966,971,982,986,1003,1032,1079,1085,1100,1148,1153,1…	33,49,51,79,84,88,89,96,97,104,108,115,127,148,150,153,158,173,195,202,204,205,219,223,248,263,267,270,274,282,286,294,297,321,328,335,356,373,383,386,397,399,403,417,420,425,430,460,482,493,510,514,519,522,533,546,561,563,574,577,581,592,630,642,644,645,652,666,675,684,688,706,713,719,724,735,739,740,745,791,793,800,804,806,829,830,832,836,866,867,885,906,916,930,940,956,958,961,966,971,982,986,…	ADCY2,ADD3,ADH1B,ADM,ANGPTL4,ANK2,ANP32E,B3GNT3,BANK1,BBOX1,CAV1,CCL20,CCL5,CCR2,CD38,CHAC1,CHI3L2,CHST3,CLEC4A,CLIC3,COL4A2,COTL1,CTGF,CTSC,CXCL12,CYP26B1,DCN,DEFB1,DKK1,DLK1,DSC2,DSC3,DTNB,EDN1,EMCN,EN1,EPB41L2,EXTL1,FAM171A1,FAM49A,FERMT1,FOXC1,FZD7,GABBR2,GABRP,GALNT12,GALNT3,GPR126,GPR183,GRAMD3,HOXA5,IGF1,IL21R,IMPA2,ITGA6,ITGB7,KHDRBS3,KLF5,KLF6,KRT17,LBR,LILRA4,LMO4,LTBP1,LTF,LYN,LYVE1,MA…	ABCA8,ABCC2,ABCC4,ACADL,ACAP1,ACE2,ACTG2,ADAMDEC1,ADAMTS1,ADCY2,ADD3,ADH1B,ADM,AIM1,AKR1C1,AKR1C2,ALDH1A1,ALDH1A3,AMD1,ANGPT1,ANGPTL4,ANK2,ANP32E,ANXA1,ANXA3,APBA2,APOD,APP,AQP1,ARHGAP25,ARL4C,ART3,ASS1,B3GNT3,BACE2,BAG2,BANK1,BBOX1,BCL11A,BCL11B,BCL2A1,BIN1,BIN2,BIRC3,BTN3A2,C10orf10,C1S,C3,C7,CA9,CALD1,CALML5,CAPN6,CAV1,CAV2,CCL13,CCL18,CCL19,CCL2,CCL20,CCL21,CCL5,CCR2,CCR7,CD19,CD1C,CD1E,CD2,C…
MSigDB Perturbation	RUTELLA_RESPONSE_TO_HGF_VS_CSF2RB_AND_IL4_UP	Genes up-regulated in peripheral blood mononucleocytes by HGF [GeneID=3082] compared to those regulated by CSF2RB (GM-CSF) and IL4 [GeneID=1437;3565].	29	1.83182e-06	0.00616225	0.000212491	1.42427	123.572	176	3771	0.0769231	0.046672	103	396	399	6,11,16,17,21,34,39,42,51,54,66,67,84,129,150,153,171,207,208,212,252,265,276,278,284,290,300,307,320,328,354,360,371,420,434,447,471,473,489,509,517,539,541,546,560,576,599,628,650,658,660,670,680,700,701,709,715,721,729,734,742,744,752,756,778,803,835,848,856,865,889,922,951,961,988,1008,1012,1013,1086,1097,1105,1106,1122,1129,1134,1159,1178,1207,1221,1227,1232,1241,1258,1262,1324,1325,1376,139…	6,11,16,17,21,34,39,42,51,54,66,67,84,129,150,153,171,207,208,212,252,265,276,278,284,290,300,307,320,328,354,360,371,387,420,434,447,471,473,489,509,517,539,541,546,560,576,599,628,650,658,660,670,680,700,701,709,715,721,729,734,742,744,752,756,778,803,835,848,856,862,865,889,922,951,961,988,1008,1012,1013,1086,1087,1097,1105,1106,1122,1129,1134,1159,1178,1199,1203,1207,1221,1227,1232,1235,1241,…	ACAA2,ACADVL,ACAT1,ACKR5,ACP5,ALAS1,APLP2,AQP9,ARFGAP3,ATP6V1C1,ATP6V1H,ATP9B,B4GALT5,BCAT1,CALML4,CCR1,CCR5,CD2AP,CD300A,CD55,CHST15,CNPY3,COL4A3BP,CPD,CTSB,CTSD,CYP27A1,DDIT4,DECR1,DPEP2,DUSP6,FBP1,GADD45G,GALC,GM2A,GNS,GOT2,GSR,HBEGF,HDAC9,IL18,IL1A,IL1B,IMPA2,IRAK3,ITPK1,ITPR1,LAMP2,LHFPL2,LILRB2,LMO2,LPAR1,LTA4H,MAFB,MAPRE2,MCTP1,MPRIP,MPZL1,MS4A4A,MTX2,MYOF,NAMPT,NEDD9,NINJ2,NLRP3,NOTCH2,NP…	ABCC3,ACAA2,ACADVL,ACAT1,ACKR5,ACO1,ACP5,ACPP,ADAM28,ADAMDEC1,AIF1,AKR1B1,AKR1C1,AKR1C2,AKT3,ALAS1,ALDH3A2,ALOX5,AMPD2,ANXA5,AOAH,APLP2,APOC1,APOE,APOO,AQP9,ARFGAP3,ARHGEF40,ASAH1,ATP13A3,ATP6V0A1,ATP6V0E1,ATP6V1C1,ATP6V1H,ATP9B,B4GALT5,BCAP31,BCAT1,BHLHE41,C1QA,C1S,C3,C3AR1,C5AR1,C6orf106,CALHM2,CALML4,CASP1,CCL18,CCL2,CCL8,CCND1,CCR1,CCR5,CD14,CD163,CD2AP,CD300A,CD47,CD48,CD52,CD55,CD63,CD68,CD…
MSigDB Perturbation	RUTELLA_RESPONSE_TO_CSF2RB_AND_IL4_DN	Genes down-regulated in peripheral blood monocytes by CSF2RB (GM-CSF) and IL4 [GeneID=1437;3565].	30	1.94881e-06	0.0065558	0.000218527	1.48459	96.9964	144	2960	0.0629371	0.0486487	84	306	308	6,11,16,17,34,39,42,51,54,66,67,84,121,129,150,171,207,252,265,276,278,290,300,310,320,328,354,360,371,425,434,447,471,509,539,546,560,576,599,628,660,670,680,700,701,709,715,721,729,734,742,744,756,803,856,865,889,890,922,951,961,988,1008,1013,1039,1086,1097,1105,1122,1129,1134,1159,1178,1207,1227,1232,1258,1262,1324,1325,1376,1397,1404,1405,1432,1435,1443,1505,1520,1534,1558,1571,1629,1660,1683…	6,11,16,17,34,39,42,51,54,66,67,84,121,129,150,171,207,252,265,276,278,290,300,310,320,328,354,360,371,387,425,434,447,471,509,539,546,560,576,599,628,660,670,680,700,701,709,715,721,729,734,742,744,756,803,856,862,865,889,890,922,951,961,988,1008,1013,1039,1086,1087,1097,1105,1122,1129,1134,1159,1178,1199,1203,1207,1227,1232,1235,1258,1262,1317,1324,1325,1376,1397,1404,1405,1424,1432,1435,1443,1…	ACAA2,ACADVL,ACAT1,ACKR5,APLP2,AQP9,ARFGAP3,ARHGEF6,BCAT1,CALML4,CCR1,CCR5,CD2AP,CD300A,CD55,CFP,CHST15,CNPY3,COL4A3BP,CPD,CTSB,CTSD,CYP27A1,DDIT4,DECR1,DPEP2,DUSP6,F2RL1,FBP1,GADD45G,GALC,GNS,GSR,HBEGF,HDAC9,HEBP2,IL18,IL1B,IMPA2,IRAK3,ITGA4,ITPK1,ITPR1,LILRB2,LMO2,LTA4H,LTB4R,MAFB,MAPRE2,MCTP1,MPRIP,MS4A4A,MYOF,NAMPT,NEDD9,NINJ2,NLRP3,NOTCH2,PGS1,PPIF,RAB20,RARRES3,RERE,RHOQ,RIN2,SEPT9,SIGIRR,S…	ABCC3,ACAA2,ACADVL,ACAT1,ACKR5,ACPP,ADAM28,AIF1,AKR1B1,ALDH3A2,ALOX5,AMPD2,ANP32A,ANXA5,AOAH,APLP2,AQP9,ARFGAP3,ARGLU1,ARHGEF40,ARHGEF6,ASAH1,ATP13A3,ATP6V0A1,ATRX,BCAT1,BHLHE41,C1QA,C3,C3AR1,C5AR1,CACNA2D3,CALHM2,CALML4,CASP1,CCL2,CCNL1,CCR1,CCR5,CD14,CD163,CD2AP,CD300A,CD48,CD52,CD55,CD68,CDKN1C,CEBPD,CES1,CFD,CFP,CHPF2,CHPT1,CHST15,CLEC4E,CLEC5A,CMKLR1,CNPY2,CNPY3,COL4A3BP,CPD,CPM,CRTAM,CTBS,C…
MSigDB Perturbation	LIU_TOPBP1_TARGETS	Genes up-regulated in U2OS cells (osteosarcoma) upon knockdown of TOPBP1 [GeneID=11073].	31	2.57092e-06	0.00864857	0.000278986	4.23842	3.53906	15	108	0.00655594	0.138889	4	13	14	5,82,125,135,151,157,211,233,454,534,682,1338,1800,2194,2426	5,82,125,135,151,157,211,233,454,534,682,1338,1800,2194,2426,3630,5873,6018,7312,7740,8251,8724,9740,11263,12603,12801,13268,14195,14710,14878,14893,15128,16038,16541,17731,20247,21460,21596,22192,22350,22993,23519,23587,24073,25368,28808,29562,29820,30451,31405,32343,32353,34314,35101,35575,36854,37073,37074,39140,40375,40761,42150,42265,42298,44413,44627,45424,45808,46359,46429,46571,49190,4951…	ADCK3,HIC1,MDM2,PAX5	ADCK3,AQP3,E2F5,ERBB4,HIC1,IGFBP3,MDM2,MPZL2,PAX5,RECQL5,RFC1,TP53INP1,TP73
MSigDB Perturbation	ABE_VEGFA_TARGETS_2HR	Genes up-regulated in HUVEC cells (endothelium) at 2 h after VEGFA [GeneID=7422] stimulation.	32	3.03177e-06	0.0101989	0.000318715	3.10817	7.07811	22	216	0.00961539	0.101852	9	32	33	21,33,153,171,307,420,466,473,599,778,1106,1139,1213,2032,2088,2181,2467,2484,2570,2606,2607,2632	21,33,153,171,307,420,466,473,599,778,1106,1139,1213,2032,2088,2181,2467,2484,2570,2606,2607,2632,3114,3216,3519,3560,3942,4241,4414,4472,4638,5056,5288,5457,5520,5606,5889,6159,6270,6525,6570,6653,6752,7372,7428,7680,8064,8091,8342,8907,9812,10008,10035,10823,10886,11051,11124,11793,11829,11843,11955,12025,12149,12870,13630,13651,13909,14056,14103,14129,14271,14912,14992,15209,15444,15545,15658,…	BPI,CDKN1A,EIF1,HBEGF,PPAP2B,RAPGEF1,RCAN1,UPP1,XPO7	APOE,AURKC,BPI,CARS,CD1B,CD3EAP,CDKN1A,CUX1,CYP1A1,DAPK3,EIF1,ELAVL4,HBEGF,HERPUD1,LDLR,MCM2,NELFE,NR4A1,PDCD1,PPAP2B,PPL,PPY,PRKCD,PTGS2,RAPGEF1,RCAN1,SERPINB2,TKTL1,TNFRSF14,UPP1,XPO7,ZCCHC14
MSigDB Perturbation	RUAN_RESPONSE_TO_TNF_TROGLITAZONE_DN	Adipocyte abundant genes down-regulated in 3T3-L1 cells (fibroblasts induced to differentiate to adipocytes) in response to troglitazone [PubChem=5591] and TNF [GeneID=7124].	33	3.25205e-06	0.0109399	0.000331513	2.7193	9.92902	27	303	0.0118007	0.0891089	9	41	43	15,18,113,128,145,174,210,234,253,332,419,459,485,879,1136,1164,1267,1323,1576,1592,1927,2130,2230,2234,2325,2429,2735	15,18,113,128,145,174,210,234,253,332,419,459,485,879,1136,1164,1267,1317,1323,1576,1592,1827,1927,2130,2230,2234,2325,2429,2735,2869,3059,3283,3431,3567,3925,4892,4953,5058,5331,5365,5553,5657,6451,6538,6648,6849,6977,7053,7350,7465,7650,7653,7904,7992,8105,8458,8497,8499,9035,9380,9479,9549,9993,10313,10671,10690,10701,10735,11014,11067,12351,13323,13639,13764,13856,14000,14138,14402,14710,1473…	ABCD2,ARAF,DHRS3,HIPK2,IDH1,NRIP1,PEMT,PLA2G6,RNF11	ABCD2,ADIPOQ,ADRB3,ALAD,AOC3,AP3S1,APOC4,AQP7,ARAF,CBX4,CDKN2C,CFD,CIB2,DHRS3,FASN,FXYD1,GPAM,HIPK2,HK2,HSD17B4,IDH1,IDH3G,IRX3,LPL,MUT,NRIP1,ORM1,PC,PEMT,PLA2G6,PPARG,PXMP2,RASD1,RETN,RGS2,RNF11,SCD,SELENBP1,SLC2A4,TPP2,TST
MSigDB Perturbation	ROME_INSULIN_TARGETS_IN_MUSCLE_UP	Genes up-regulated by 3 h of euglycemic hyperinsulinemic clamp in the vastus lateralis muscle of healthy lean subjects.	34	3.88451e-06	0.0130675	0.000384338	1.44642	105.778	153	3228	0.0668706	0.0473978	80	424	430	10,60,70,71,98,131,152,185,187,196,214,217,258,266,267,271,299,324,331,346,355,371,386,388,389,409,414,417,425,443,463,468,470,471,482,487,489,501,539,545,558,577,581,608,623,624,629,639,640,647,666,673,702,721,736,737,785,796,801,869,871,903,904,913,919,954,1007,1046,1059,1164,1171,1174,1194,1208,1213,1214,1230,1231,1254,1287,1290,1305,1323,1324,1374,1376,1401,1407,1420,1435,1472,1495,1548,1557,…	10,60,70,71,98,131,152,185,187,196,214,217,258,266,267,271,299,324,331,346,355,371,386,388,389,409,414,417,425,443,463,468,470,471,482,487,489,501,539,545,558,577,581,608,623,624,629,639,640,647,666,673,694,702,721,736,737,785,796,801,869,871,903,904,911,913,919,932,954,1007,1046,1059,1141,1164,1171,1174,1194,1208,1213,1214,1230,1231,1254,1287,1290,1305,1323,1324,1374,1376,1401,1407,1420,1435,146…	AAGAB,ACAA2,ACSL1,ADD3,AHCYL1,AKAP13,ALAS2,ANKRD17,ARF4,BAG3,C14orf166,CCDC91,CYSTM1,DNAJB6,DTNA,EIF1,ENDOD1,FAM136A,FNBP1,GNPDA1,GOT2,GPR157,H2AFZ,HIPK2,HSF2,IP6K3,KANSL3,KIF5B,KPNB1,LACTB,LAPTM4B,LCOR,MAP3K7CL,METTL4,MYL12B,MYPN,NDFIP1,NDUFS4,NFIA,NUBP1,ODC1,OXA1L,PAM,PDE7A,PIK3CB,PIK3R1,PPARA,PRDX6,PSMB2,PTMA,RAD23B,RBX1,RCSD1,RHEB,RPS20,RRAGD,RYBP,SATB1,SCOC,SET,SLC25A12,SLC35B1,SMIM20,SUMO1,…	AAGAB,ACAA2,ACSL1,ACYP2,ADD3,ADSL,ADSSL1,AHCYL1,AHSA1,AIMP2,AKAP13,AKAP6,AKR1C2,ALAS2,ALDOA,AMFR,ANAPC16,ANKRD17,ANKRD40,ANXA7,APIP,ARCN1,ARF4,ARIH1,ARPC3,ARPP19,ASB12,ASB8,ASH1L,ATL3,ATP6V0B,ATP6V1E1,ATP8A1,ATRAID,ATXN1,ATXN3,BAG3,BCCIP,BCL2L2,BRE,BTF3,BVES,C14orf166,C15orf61,C1S,C1orf198,C21orf33,C4orf3,C9orf78,CALHM2,CAMLG,CAND2,CANX,CAPN2,CBX3,CCDC86,CCDC91,CCL16,CCT4,CCT6A,CCT8,CD36,CD59,CDK…
MSigDB Perturbation	DURCHDEWALD_SKIN_CARCINOGENESIS_DN	Genes down-regulated upon skin specific knockout of FOS [GeneID=2353] by cre-lox in the K5-SOS-F mice (express a constitutively active form of SOS1 [GeneID=6654] in the skin).	35	4.60559e-06	0.0154932	0.000442663	1.47854	91.9827	136	2807	0.0594406	0.0484503	74	252	259	3,4,18,48,55,59,67,115,144,160,165,169,172,188,193,200,208,226,242,250,253,258,279,299,305,306,308,378,401,406,423,448,449,467,529,544,555,557,562,603,608,635,641,654,659,676,705,707,718,754,758,795,797,803,807,812,836,851,948,957,958,966,982,987,1024,1047,1061,1113,1116,1136,1164,1180,1198,1223,1238,1248,1287,1326,1328,1407,1412,1426,1431,1493,1511,1522,1592,1593,1611,1617,1621,1626,1694,1714,17…	3,4,18,48,55,59,67,115,144,160,165,169,172,188,193,200,208,226,229,242,250,253,258,279,299,305,306,308,378,401,406,423,448,449,467,529,544,555,557,562,603,608,635,641,654,659,676,705,707,718,727,754,758,795,797,803,807,812,836,851,868,911,948,957,958,966,982,987,1024,1047,1061,1107,1113,1116,1136,1141,1164,1180,1198,1223,1238,1248,1265,1287,1326,1328,1380,1407,1412,1426,1431,1463,1493,1511,1513,1…	ADARB1,ADD2,ADNP,ANK3,APLP2,ARAP2,ASAP1,BCAR3,CADM1,CAMK2D,CCNG1,CD44,CD80,COMMD10,DAP,DAPK2,DDX6,DEFB1,DEGS2,DHX37,DIP2B,DLG1,EEA1,ENSG00000173517,ESM1,FLRT2,FLRT3,GALNT12,GJB6,GM2A,GSR,HMGCS1,HOXA1,ITGA6,KDM5B,KIAA0513,KIF1B,KIF5B,KLF3,KLF6,LAMA3,MACF1,MAP4K4,MAPK6,MED13,MYH9,MYO5B,NRIP1,ODC1,OR2B2,PHLDA1,PIAS1,PIK3CB,PLD1,PTPN12,RUNX1,RUSC2,SAMHD1,SEMA3C,SLC4A7,SNN,STIM2,STX11,TINAGL1,TIPARP,T…	ABCC1,ABCG1,ACOX1,ADAM12,ADARB1,ADD2,ADNP,AFF4,AGPAT9,AGPS,AHCYL2,AKR1D1,ALDH1A3,ANK3,APLN,APLP2,AQP3,ARAP2,ARID3A,ARNT,ASAP1,ATF7IP,ATP13A3,ATP2C1,B4GALT1,BCAR3,BLCAP,BTBD10,CADM1,CAMK2D,CAMSAP2,CAST,CAT,CCDC88A,CCNG1,CCNY,CD44,CD80,CDC40,CEP350,CHI3L1,CLIP1,CMTM4,COBLL1,COMMD10,CPEB4,CRABP2,CREBBP,CSRNP1,CTNND1,DAP,DAPK2,DCUN1D3,DDX3X,DDX49,DDX6,DEDD,DEFB1,DEGS2,DHX37,DIP2B,DLG1,DOCK1,DPP8,DSG3…
MSigDB Perturbation	BYSTROEM_CORRELATED_WITH_IL5_DN	Genes whose expression in bone marrow samples correlated inversely with increased levels of serum IL5 [GeneID=3567].	36	5.37743e-06	0.0180897	0.000502491	2.00932	23.8886	48	729	0.020979	0.0658436	24	63	63	8.11311e+173	81,131,148,178,185,217,270,292,369,403,408,414,493,565,705,736,871,960,1030,1031,1033,1040,1098,1170,1201,1219,1269,1370,1374,1389,1401,1422,1428,1440,1552,1612,1621,1686,1805,1818,2070,2089,2108,2151,2184,2237,2341,2420,2469,2504,2514,2558,2561,2579,2590,2654,2905,2944,2994,3136,3159,3208,3222,3331,3368,3385,3505,3581,3590,3598,3744,3779,3823,3917,3943,4067,4155,4187,4227,4255,4359,4365,4387,441…	ADAR,BAZ1B,BCL2,CAND1,CASP7,CD180,CD44,CEACAM21,HIVEP2,IL6ST,ITGAM,LYST,MTMR1,NR3C1,PIK3CD,PIK3R1,PIM1,PLD1,PSTPIP2,SF3B1,SLA,STAT5B,SYK,TMPO	ADAM10,ADAR,ADCK1,AP1G1,ARNT,BAZ1B,BCL2,CAND1,CASP7,CD180,CD44,CEACAM21,CLK4,CNOT7,CYBB,DDB1,EIF2AK2,EIF4G1,ERCC2,FOXM1,HCFC1,HIPK1,HIVEP2,IKZF1,IL6ST,INCENP,ITGAL,ITGAM,KLRK1,KPNA3,LYST,MAPK9,MAPKAPK2,MATR3,MTMR1,MXD1,NR3C1,NVL,PAPOLA,PIK3CD,PIK3R1,PIM1,PITPNB,PKNOX1,PLD1,PSTPIP2,PTPRJ,RAB10,RARA,RNF13,RNF2,SF3B1,SLA,SLFN12,SORL1,SRSF1,STAT5B,SYK,TFDP1,TMPO,TRAM1,WRN,ZNF22
MSigDB Perturbation	DELYS_THYROID_CANCER_UP	Genes up-regulated in papillary thyroid carcinoma (PTC) compared to normal tissue.	37	5.41073e-06	0.0182017	0.000491938	1.41078	119.083	168	3634	0.0734266	0.0462301	92	432	443	15,18,21,48,60,67,89,105,110,113,128,129,136,143,144,145,174,200,210,214,219,228,230,253,267,278,305,307,332,335,338,373,378,383,401,419,434,444,470,471,473,480,499,503,504,560,562,569,604,615,628,650,659,664,666,677,695,701,705,709,713,716,733,742,764,778,786,829,867,885,890,912,966,1017,1035,1061,1106,1111,1120,1136,1148,1157,1163,1164,1172,1221,1223,1230,1244,1253,1261,1263,1299,1309,1316,1320…	15,18,21,48,60,67,89,105,110,113,128,129,136,143,144,145,174,200,210,214,219,228,230,253,267,278,305,307,332,335,338,373,378,383,401,419,434,444,470,471,473,480,499,503,504,560,562,569,604,615,628,637,650,659,664,666,677,695,701,705,709,713,716,733,742,764,778,786,826,829,867,885,890,912,932,949,966,1017,1035,1061,1062,1087,1094,1106,1111,1117,1120,1136,1148,1157,1163,1164,1172,1209,1221,1223,123…	ABR,ACAA2,ADM,APLP2,ARNTL,ATP1B3,B3GAT1,BCAT1,BHLHE40,C4A,CCND2,CCR1,CD44,CD55,CD97,CDKN1A,CHI3L2,CPD,CTSB,CTSC,CTSD,DAPK2,DDB2,DHRS3,DPP4,DSC2,DUSP4,DUSP6,ELF3,ELF4,ENDOD1,EPHA4,EPHB3,ETV5,FGF1,FXYD5,GABBR2,GALNT12,GDF15,HIP1,IER3,ITGA9,ITGB5,ITGB7,KCNK1,KRT17,LOXL2,LY6E,LYN,MAP3K5,MAP4K4,MDK,MED13,MET,MFGE8,MMP7,MRC2,MST1R,NPC2,NRIP1,NRP2,ODC1,PRDM1,PTP4A3,PTPRG,RAD23B,RBBP8,RGS3,RHOBTB3,ROR1,R…	ABCC3,ABCC6,ABR,ACAA2,ACOT7,ACTN4,ACY1,ADAM12,ADK,ADM,ADORA1,ADORA3,AGR2,AGRN,AHNAK2,AIM1,ALDH1A3,ALDH3B1,ALOX15B,ALOX5,ALOX5AP,ANXA1,ANXA2,ANXA8,ANXA8L1,APLNR,APLP2,APOC1,APOC2,APOE,AREG,AREGB,ARHGAP19,ARHGAP19-SLIT1,ARHGDIB,ARMCX6,ARNTL,ATIC,ATP10B,ATP11A,ATP1B3,ATP6V1B2,B3GAT1,BCAT1,BCL2A1,BCL9,BHLHE40,BICD1,BID,BIRC7,C1QA,C1QB,C1orf115,C2,C3,C3AR1,C4A,C9orf16,CA11,CAPG,CBLN1,CCL13,CCL17,CCL18…
MSigDB Perturbation	THILLAINADESAN_ZNF217_TARGETS_DN	Genes bound and repressed by ZNF217 [GeneID=7764] in MCF7 cells (breast cancer).	38	5.44166e-06	0.0183057	0.00048173	3.78501	4.22721	16	129	0.00699301	0.124031	3	9	9	32,75,218,239,241,440,508,564,622,914,942,1016,1458,1555,1845,2541	32,75,218,239,241,440,508,564,622,914,942,1016,1417,1458,1555,1845,2541,3016,3983,4671,4752,4894,4906,5003,5215,5896,7398,7567,7736,8111,8730,9038,9329,10725,10776,11120,11946,12247,12342,13249,14016,15454,15864,15979,16517,17369,17799,20540,21526,23057,23125,23672,25049,25505,25557,26516,26534,26644,29300,29685,30211,30696,30714,32591,34577,35624,36104,37280,38010,39633,40131,41312,43196,43470,4…	EFNB2,MAN1A1,VAV3	ABCA12,C4orf32,CDKN2B,EFNB2,FAM63A,MAN1A1,TCEAL8,THYN1,VAV3
MSigDB Perturbation	BHAT_ESR1_TARGETS_VIA_AKT1_UP	Genes bound by ESR1 [GeneID=2099] and up-regulated by estradiol [PubChemID=5757] in MCF-7 cells (breast cancer) expressing constitutevly active form of AKT1 [GeneID=207].	39	5.85325e-06	0.0196903	0.00050488	1.51939	77.6626	118	2370	0.0515734	0.049789	55	271	273	6,15,16,17,21,31,42,45,65,80,113,114,128,145,174,207,210,265,282,287,289,306,307,332,360,368,378,412,419,434,446,447,457,473,495,501,525,586,604,605,613,615,650,653,663,668,698,712,715,742,744,756,764,778,785,801,805,806,820,831,842,872,912,938,969,1091,1106,1134,1152,1159,1206,1221,1262,1263,1306,1327,1339,1397,1407,1432,1433,1443,1505,1509,1515,1534,1573,1576,1610,1629,1672,1747,1770,1790,1932,…	6,15,16,17,21,31,42,45,65,80,113,114,128,145,174,207,210,265,282,287,289,306,307,332,360,368,378,412,419,434,446,447,457,473,495,501,525,586,604,605,613,615,650,653,663,668,698,712,715,742,744,756,764,778,785,801,805,806,820,831,842,872,912,938,969,1063,1091,1106,1126,1134,1152,1159,1206,1221,1235,1262,1263,1306,1317,1327,1339,1397,1407,1432,1433,1437,1443,1487,1505,1509,1515,1534,1573,1576,1610,…	A4GALT,AATF,ADARB1,ADCY9,ARHGEF18,ATF3,BEGAIN,BHLHE40,CALM1,CAMTA1,CTSD,CYP26A1,DEGS2,DHRS2,DHRS3,FCHO1,FLNB,GADD45G,GDF15,GFOD1,GPR37L1,HPCAL1,IER3,LRG1,MCM7,MPPED2,MYB,NCOR2,NT5DC3,NXT1,PARP12,PPIF,PRKAG2,PRR5,PTGES,PTH1R,RAPGEFL1,RCL1,RGS16,SCARB1,SEPT9,SLC10A3,SLC22A5,SLC29A1,SLC2A1,SLC6A6,SVIL,TBKBP1,TBX2,TGM2,TIPARP,TUBA3C,UNC5A,UST,ZFP36L1	A4GALT,AATF,ACIN1,ADAMTSL5,ADAP1,ADARB1,ADCY3,ADCY9,AKNA,ALDH3B1,ALPL,AMZ1,AP1B1,ARAP3,ARHGEF18,ASB13,ATF3,ATP6V1C2,ATRIP,AXIN1,B4GALT1,BCL11B,BEGAIN,BHLHE40,BRD9,C10orf2,C17orf70,C1QTNF6,C1orf159,C5AR2,C9orf89,CA12,CALM1,CALM2,CALM3,CAMTA1,CBFA2T3,CCDC3,CCM2L,CCND1,CDC34,CDC42EP1,CDC6,CELSR2,CERS1,CHD9,CHST8,CLUH,CNKSR3,CNTD2,CTSD,CXXC5,CYP1B1,CYP26A1,CYP4F22,DEGS2,DHRS2,DHRS3,DOK7,DUSP2,E2F2,EF…
MSigDB Perturbation	SANA_TNF_SIGNALING_DN	Genes down-regulated in five primary endothelial cell types (lung, aortic, iliac, dermal, and colon) by TNF [GeneID=7124].	40	6.3501e-06	0.0213617	0.000534043	1.89651	29.0006	55	885	0.0240385	0.0621469	22	87	88	6,17,21,42,57,115,127,265,307,333,338,351,441,447,473,544,572,593,630,644,650,684,715,716,718,744,778,780,793,836,982,1002,1035,1057,1066,1070,1106,1134,1221,1262,1293,1334,1339,1423,1575,1702,1802,2033,2049,2256,2278,2309,2467,2502,2555	6,17,21,42,57,115,127,265,307,333,338,351,441,447,473,544,572,593,630,644,650,684,715,716,718,724,744,778,780,793,836,932,982,1002,1035,1057,1063,1066,1070,1106,1134,1221,1250,1262,1293,1334,1339,1423,1575,1702,1802,1872,1882,2022,2033,2049,2256,2278,2309,2467,2502,2555,2615,3089,3152,3210,3530,3613,3627,3761,3768,3805,3811,3928,3989,3996,4051,4190,4416,4418,4472,4737,4753,4783,4789,4791,4974,513…	ATP1B3,CABLES1,CALCRL,CD34,CTGF,DDR1,EMCN,EPAS1,GIMAP6,ITGA6,LYVE1,MYOF,NTN4,PGAM2,PHLDA1,POSTN,PRKCH,RHOJ,SRSF7,TGM2,TXNDC5,ZNF521	ACE,AHNAK2,AK5,ALDH1A1,ANTXR1,ANXA1,ANXA2,APLN,ARHGDIB,ARL5A,ARL6IP1,ATP1B3,ATP5A1,BGN,BLOC1S5-TXNDC5,BMX,C1orf43,CABLES1,CALCRL,CAPNS1,CCNA1,CD34,CDCA7L,CDK2AP1,CLU,CTGF,CTNNAL1,DDR1,DHRS11,DNAJB4,EFEMP1,EMCN,EPAS1,FAM198B,FHL2,GBA2,GIMAP6,GIMAP7,GLCE,HDAC2,HTR1B,IGFBP4,ITGA6,JAG2,KCTD12,KDR,KRT18,KRT7,LDB2,LYVE1,MMRN1,MTUS1,MYOF,NFIB,NOS3,NQO1,NT5E,NTN4,PALMD,PCTP,PDLIM4,PEA15,PGAM2,PHLDA1,POST…
MSigDB Perturbation	DUTERTRE_ESTRADIOL_RESPONSE_6HR_UP	Genes up-regulated in MCF7 cells (breast cancer) at 6 h of estradiol [PubChemID=5757] treatment.	41	6.53783e-06	0.0219933	0.000536421	1.58654	61.7696	98	1885	0.0428322	0.0519894	48	219	222	6,9,17,18,21,31,42,80,214,226,231,253,265,279,289,307,338,351,378,429,446,447,449,473,481,501,525,544,552,586,650,689,705,708,715,718,744,778,780,791,829,831,938,969,1070,1106,1134,1136,1159,1164,1206,1221,1234,1262,1290,1368,1432,1443,1461,1505,1509,1515,1572,1592,1593,1601,1613,1621,1629,1669,1729,1802,1852,1927,2072,2163,2180,2217,2224,2229,2259,2263,2278,2315,2325,2337,2339,2344,2384,2429,244…	6,9,17,18,21,31,42,80,214,226,231,253,265,279,289,307,338,351,378,429,446,447,449,473,481,501,525,544,552,586,638,650,689,705,708,715,718,744,778,780,791,829,831,938,969,1063,1070,1072,1106,1117,1134,1136,1141,1159,1164,1206,1221,1234,1235,1262,1290,1368,1417,1432,1443,1461,1477,1505,1509,1515,1538,1572,1592,1593,1601,1613,1621,1629,1669,1729,1739,1802,1852,1927,1958,2072,2150,2163,2180,2217,2224…	ABHD2,ADCY9,B3GALNT1,BCL2,CD44,CXCL12,DDX10,DPM2,ENDOD1,EXOSC5,FLNB,HELLS,HIF1A,IFNAR2,LRRFIP2,MACF1,MCM5,MCM7,MLF1IP,MTHFD1L,MYB,MYC,MYOF,NRIP1,NT5DC3,PHLDA1,PLAC1,PPIF,PRIM1,PTGES,RAPGEFL1,RBBP8,RBL1,RFC3,SCARB1,SEPT9,SLC1A5,SLC22A5,SLC29A1,SLC7A1,SMOX,SVIL,TGM2,TIPARP,TMEM164,UGCG,WDR4,XRCC2	ABCE1,ABHD2,ADCY9,AKAP1,ALDH3A2,AMD1,AMZ1,ANKH,AP1B1,AREG,AREGB,ARL3,ASB13,ATP11A,ATP6V1C2,B3GALNT1,BCL2,BCS1L,BLVRB,BRCA1,BRI3BP,BRIP1,C1QTNF6,C8orf44-SGK3,CA12,CALCR,CCNE2,CD44,CD82,CDC45,CDC6,CDCA7,CELSR2,CHAF1A,CHEK1,CHRNA5,CNKSR3,COL12A1,CTPS1,CXCL12,CXorf27,DDX10,DDX21,DEPTOR,DKC1,DPM2,DSCC1,DTL,E2F1,ECE2,EGR3,ELF1,ELOVL2,ENDOD1,EXO1,EXOSC5,FARP1,FEN1,FKBP4,FKBP5,FLNB,FRK,GAB2,GART,GINS2,GI…
MSigDB Perturbation	PASQUALUCCI_LYMPHOMA_BY_GC_STAGE_UP	Genes up-regulated in post-GC, BCL6 [GeneID=604] dependent B cell non-Hodgkin's lymphoma (B-NHL) vs MYC [GeneID=4609] driven pre-GC lymphoma.	42	6.85595e-06	0.0230634	0.000549129	1.5053	80.3825	121	2453	0.0528846	0.0493273	70	269	273	21,25,67,77,84,86,143,191,194,203,216,221,231,242,298,307,314,347,378,380,388,461,473,544,565,577,578,596,620,625,650,660,687,705,718,749,778,782,787,796,847,850,851,936,947,951,961,978,980,981,996,1015,1047,1048,1106,1120,1121,1154,1156,1170,1172,1198,1201,1221,1226,1261,1287,1305,1352,1362,1450,1452,1460,1481,1493,1518,1611,1621,1668,1720,1761,1785,1802,1809,1820,1846,1856,1868,1869,1889,1960,2…	21,25,67,77,84,86,143,191,194,203,216,221,231,242,298,307,314,347,378,380,388,461,473,544,565,577,578,596,620,625,650,660,665,687,705,710,718,749,762,776,778,782,787,796,847,850,851,911,936,947,949,951,961,978,980,981,996,1015,1047,1048,1106,1120,1121,1154,1156,1170,1172,1198,1201,1221,1226,1228,1261,1287,1305,1348,1352,1362,1450,1452,1460,1481,1493,1518,1611,1621,1668,1670,1715,1720,1761,1785,18…	AGPAT5,AIG1,ANKRD6,ATP2B4,ATP6V0C,B3GALNT1,BHLHA15,CCND2,CCNG1,CD44,CDC42BPB,CEBPB,CERS6,CHST11,CITED2,CLVS1,CTSZ,CYSTM1,DCAF12,DENND5B,EPDR1,FNDC3A,FNIP2,GABRA4,GUSB,HIVEP3,HNRNPLL,ICA1,IGF1R,IL6ST,INTU,IRF4,ITGB5,LAPTM4B,LAX1,MAMDC2,MATN2,NUDT4,PGAM2,PHLDA1,PIK3CB,PPEF2,PRDM1,PRICKLE1,RAB20,RAB2A,RBM47,RGS3,RHOBTB3,SEL1L,SEMA4G,SH3BGRL2,SKIL,SNAI2,SPATS2,SSR2,SSR3,ST14,TANC2,TGM2,TMEM248,TMEM38…	ABCA1,ABCC1,ADA,AGPAT5,AIG1,ALDH7A1,AMZ2,ANKRD6,ANTXR1,ANXA5,ARMCX3,ASNS,ASPH,ATP2B4,ATP6V0C,B3GALNT1,BASP1,BBS2,BBS7,BHLHA15,BLNK,BMP8B,BTG2,CACNA1H,CACNB3,CCND2,CCNG1,CCPG1,CD2BP2,CD44,CDC42BPB,CDK18,CDV3,CEBPB,CERS6,CHID1,CHRND,CHST11,CITED2,CKAP4,CLPTM1L,CLTB,CLVS1,CNPY2,COQ3,CORO2B,CPEB3,CPED1,CREB3L2,CRELD2,CRLF1,CSRNP1,CTSZ,CYSTM1,DCAF12,DCLRE1B,DENND5B,DERL1,DLL3,DSP,DUSP14,DUSP16,DUSP22,…
MSigDB Perturbation	LEI_MYB_TARGETS	Myb-regulated genes in MCF7 (breast cancer) and lung epithelial cell lines overexpressing MYBL2, MYBL1 or MYB [GeneID=4605;4603;4602].	43	6.89999e-06	0.0232116	0.000539804	1.54973	69.0444	107	2107	0.0467657	0.0507831	61	299	313	15,21,39,64,73,92,104,113,128,145,148,165,174,208,210,219,230,235,249,255,263,307,308,321,328,332,347,371,399,403,419,434,473,475,481,493,510,518,527,555,625,650,656,662,721,742,757,778,781,789,930,1013,1029,1048,1056,1082,1106,1130,1158,1172,1207,1219,1221,1241,1259,1263,1270,1325,1327,1339,1382,1386,1389,1461,1509,1530,1570,1576,1640,1648,1659,1727,1728,1778,1779,1864,1865,1928,1997,2000,2032,2…	15,21,39,64,73,92,104,113,128,145,148,165,174,208,210,219,230,235,249,255,263,286,307,308,321,328,332,347,371,399,403,419,421,430,434,473,475,481,493,510,518,519,527,555,625,650,656,662,721,724,742,757,778,781,789,862,930,1013,1029,1048,1056,1082,1106,1117,1130,1141,1158,1172,1207,1219,1221,1241,1249,1259,1263,1270,1313,1325,1327,1339,1382,1386,1389,1453,1461,1509,1530,1570,1576,1602,1640,1648,16…	ACBD3,ACTR2,ALAS1,ATP2A3,BAIAP2,BHLHE40,BTG1,CAV1,CCND2,CDKN1A,CEBPB,CTSD,DDR1,DHRS2,DHRS3,DNAJA1,DPM2,ELOVL5,EMP2,FBP1,FGFBP1,GJA1,GM2A,GPR126,IL1B,KRT17,KTN1,LAMA3,LIMK2,LMTK2,LPCAT1,LTA4H,LUM,LY6E,MAOA,MCM7,MDK,MSN,MYC,NFATC3,NPC1,PALLD,POR,PTHLH,SERBP1,SERPINE1,SERPINE2,SERPING1,SFN,SFRP1,SH2B3,SLC25A1,SLC2A3,SMAD3,SMARCA2,SRGN,TARDBP,TGM2,TMEM47,UBC,ZFP36L2	ACBD3,ACTA2,ACTR2,AGR2,AHNAK2,ALAS1,ANKRD12,ANP32B,ANXA1,ANXA3,AP1G2,AP2A2,APEX1,APRT,ARF6,ARID5B,ASAH1,ASNS,ATP2A3,ATP5D,AURKA,AURKB,AXL,BAIAP2,BASP1,BHLHE40,BICD2,BLCAP,BRD2,BTG1,CA12,CAV1,CCL2,CCND1,CCND2,CD59,CDC25B,CDH1,CDK4,CDKN1A,CEACAM6,CEBPB,CFLAR,CKS2,CLDN3,CLDN7,CLEC11A,CLIC4,CLU,COL17A1,COL1A2,COL6A3,COMMD4,COX7A1,CRABP2,CREB3L2,CRIM1,CRYAB,CTCF,CTNNAL1,CTSD,CTSK,CYP1B1,CYP3A5,DAB2,DA…
MSigDB Perturbation	JUBAN_TARGETS_OF_SPI1_AND_FLI1_DN	Genes down-regulated in 745A cells (erythroleukemia) upon knockdown of FLI1 [GeneID=2313] by RNAi and down-regulation of SPI1 [GeneID=6688] by HMBA [PubChemID=3616].	44	6.9699e-06	0.0234467	0.00053288	2.10114	19.9891	42	610	0.0183566	0.0688525	22	87	89	15,48,113,119,128,145,174,190,203,210,305,332,392,402,419,481,517,528,535,585,613,757,824,825,1082,1130,1179,1223,1234,1357,1368,1432,1443,1505,1576,1629,2260,2319,2598,2664,2668,2719	15,48,113,119,128,145,174,190,203,210,305,332,392,402,419,481,517,528,535,585,613,757,824,825,1082,1130,1179,1223,1234,1357,1368,1432,1443,1505,1576,1629,2029,2260,2319,2598,2664,2668,2719,2827,2865,2879,3190,3354,3356,3533,3784,3903,3939,4009,4027,4032,4166,4329,4377,4704,4727,4847,4864,5099,5256,5305,5430,5568,5736,5741,5807,5930,5974,6050,6080,6137,6351,6797,6932,6997,7626,7744,7826,7914,7918,…	ARPC2,ASB2,BMPR1B,CCNB1,CHD1,DAPK2,FAM162A,FYTTD1,HPRT1,IGF2,MYC,NFATC3,PDE4DIP,PDSS1,RCC2,RCL1,SEPT9,SPATS2,SYNCRIP,TNFRSF1B,WDR4,ZFP36L2	AHDC1,ARPC2,ASB2,BMPR1B,BUD31,CA5B,CARD11,CCDC41,CCL3,CCNB1,CDK1,CHD1,DAPK2,DDX21,DDX24,EIF3C,EIF4B,EIF4G1,ERCC8,ETHE1,FADS2,FAM103A1,FAM162A,FOXP4,FYTTD1,GNB2L1,HNRNPL,HNRNPU,HPRT1,HRC,HSPA8,HSPE1,IGF2,IMP4,JAG2,KAT2A,KCNN4,LDHA,MBD2,MIF,MYC,NAA50,NASP,NDNL2,NEMF,NFATC3,NFYA,NHP2,NHP2L1,NIP7,NOL6,NOLC1,OGN,PDE4DIP,PDSS1,PHLDA2,PLD2,POLR1D,PPP1R14B,PSMD12,PTGIR,PUS7,RAB18,RBBP7,RCC2,RCL1,RNASE6,R…
MSigDB Perturbation	RIZ_ERYTHROID_DIFFERENTIATION_APOBEC2	Selected genes whose expression profile follows that of APOBEC2 [GeneID=10930] in the TLX1 [GeneID=3195] Tet On iEBHX15-4 cells (pro-erythroblasts).	45	8.37063e-06	0.0281588	0.000625751	2.91898	7.53688	22	230	0.00961539	0.0956522	9	24	26	5,41,82,125,135,157,211,233,248,487,497,534,538,682,790,954,1034,1441,1589,1800,2475,2653	5,41,82,125,135,157,211,233,248,487,497,534,538,682,790,954,1034,1441,1589,1800,2475,2653,3856,4261,4773,4980,5510,5682,5687,6501,6532,6542,6568,6594,6606,6708,6751,6861,7629,7952,8289,8317,8376,8750,9396,10114,10942,11019,11263,11565,11821,12022,12050,12174,12190,12338,13199,13268,13377,13423,13512,14576,15119,15200,15703,15978,15988,17041,17161,17579,17592,17729,18723,18746,19130,20013,20400,20…	CACNA1A,ESRRB,GTF3C4,HIC1,HOXA4,LCOR,NFATC2,SOX6,TFCP2L1	AIRE,CACNA1A,ESRRB,EVX2,EYA3,GTF3C4,HIC1,HNF4G,HOXA4,LCOR,MEF2C,MEIS3,MYCL,NDN,NFATC2,NR1I3,PDX1,PIAS3,SAP30BP,SFRP4,SOX6,TCF21,TFCP2L1,ZNF235
MSigDB Perturbation	PILON_KLF1_TARGETS_DN	Genes down-regulated in erythroid progenitor cells from fetal livers of E13.5 embryos with KLF1 [GeneID=10661] knockout compared to those from the wild type embryos.	46	8.9832e-06	0.0302195	0.000656945	1.16967	504.414	590	15393	0.257867	0.0383291	408	1889	1908	4,13,26,31,37,39,40,47,58,61,64,65,73,76,80,81,85,86,90,96,115,120,122,131,136,140,143,146,150,152,156,159,163,169,172,185,192,193,201,212,213,216,217,220,221,222,226,228,230,235,252,255,260,261,262,270,271,275,277,279,288,292,301,304,305,306,318,322,326,327,329,331,336,339,341,343,344,347,350,354,357,367,368,369,377,378,386,388,389,396,400,408,409,413,414,417,423,424,425,428,429,432,441,449,450,…	4,13,26,31,37,39,40,47,58,61,64,65,73,76,80,81,85,86,90,96,115,120,122,131,136,140,143,146,150,152,156,159,163,169,172,185,192,193,201,212,213,216,217,220,221,222,226,228,230,235,252,255,260,261,262,270,271,275,277,279,286,288,292,301,304,305,306,318,322,326,327,329,331,336,339,341,343,344,347,350,354,357,367,368,369,377,378,379,386,388,389,396,400,408,409,413,414,417,423,424,425,428,429,430,432,…
,24459,24461,24462,24470,24472,24477,24481,24486,24490,24500,24502,24505,24509,24510,24512,24513,24514,24519,24528,24529,24532,24541,24546,24548,24551,24554,24562,24566,24570,24575,24580,24585,24586,24590,24593,24594,24603,24604,24612,24614,24619,24620,24622,24628,24631,24637,24638,24642,24655,24657,24661,24666,24670,24677,24682,24688,24700,24708,24711,24715,24716,24717,24724,24725,24731,24735,24…
26,48628,48631,48634,48636,48642,48645,48649,48655,48660,48670,48678,48682,48683,48688,48690,48696,48705,48708,48709,48710,48716,48717,48719,48724,48727,48729,48730,48733,48734,48735,48741,48743,48746,48753,48756,48759,48761,48762,48764,48770,48772,48783,48787,48792,48794,48801,48805,48807,48808,48810,48820,48822,48823,48826,48828,48829,48830,48831,48833,48834,48843,48845,48852,48854,48865,48866,…	ABI1,ACADM,ACAT1,ACBD3,ACER3,ACSL1,ACTN1,ACTR2,ACTR3,ACVR1B,ADD3,ADO,ADSS,AEBP2,AFF1,AGO1,AGO2,AGPAT5,AGPAT6,AGTPBP1,AKAP10,AKAP12,AKAP13,AKR1E2,ALAS1,ALG5,ANAPC1,ANKRD17,ANKRD44,ANKRD46,ANP32E,ANTXR2,ARFRP1,ARHGAP17,ARHGAP21,ARHGEF18,ARID1A,ARL15,ARNTL,ASXL1,ATF1,ATF2,ATG12,ATG5,ATP11B,ATP1B3,ATXN10,BACH1,BAZ1B,BUB3,C10orf54,C14orf166,C16orf54,C17orf85,C1GALT1C1,CALM1,CAPRIN1,CAPZB,CARKD,CASP7,C…	ABCB7,ABCC1,ABCC4,ABCD1,ABCF1,ABHD10,ABHD13,ABHD14A,ABHD17B,ABHD5,ABI1,ABLIM1,ACACA,ACADL,ACADM,ACAP1,ACAP2,ACAT1,ACBD3,ACER3,ACLY,ACOT7,ACOT9,ACSL1,ACSL5,ACTN1,ACTR2,ACTR3,ACTR6,ACVR1B,ADAM10,ADAM17,ADAM9,ADAP1,ADCY7,ADD3,ADH5,ADI1,ADO,ADPGK,ADRBK2,ADSS,AEBP2,AFF1,AGK,AGL,AGO1,AGO2,AGPAT2,AGPAT5,AGPAT6,AGPS,AGTPBP1,AHNAK,AIDA,AK2,AKAP10,AKAP12,AKAP13,AKIRIN1,AKNA,AKR1B1,AKR1E2,AKT1,ALAS1,ALDH2,A…
MSigDB Perturbation	MILI_PSEUDOPODIA_HAPTOTAXIS_DN	Transcripts depleted from pseudopodia of NIH/3T3 cells (fibroblast) in response to haptotactic migratory stimulus by fibronectin, FN1 [GeneID=2335].	47	9.2204e-06	0.0310174	0.000659945	1.34146	157.291	211	4800	0.0922203	0.0439583	125	644	658	2,15,16,22,51,64,67,80,84,92,99,109,110,113,116,128,131,145,169,171,174,185,207,210,214,217,230,231,234,235,238,242,249,261,270,288,289,291,300,306,330,332,367,378,386,396,398,414,419,429,432,434,446,461,464,467,476,482,499,504,525,526,536,546,549,565,581,599,618,624,629,658,667,677,680,726,736,756,781,783,786,789,829,867,871,922,952,961,969,976,978,980,988,996,1007,1032,1042,1048,1067,1073,1083,…	2,15,16,22,51,64,67,80,84,92,99,109,110,113,116,128,131,145,169,171,174,185,207,210,214,217,224,230,231,234,235,238,242,249,261,270,288,289,291,300,306,330,332,367,378,386,396,398,414,419,429,432,434,438,446,461,464,467,476,482,499,504,525,526,536,546,549,565,581,599,618,624,629,658,667,677,680,710,726,736,756,781,783,786,789,826,829,867,871,898,922,952,960,961,969,976,978,980,988,996,1007,1032,1…	ACPL2,ACVR1B,ADAR,APLP2,ARFGAP3,ARHGAP23,ARID1A,ATG16L1,ATP10A,B4GALT5,BAIAP2,C16orf54,CD34,CD99L2,CLSTN1,CMTM6,CNPY3,COL4A2,CPD,CREB3,CSF1,CTNS,CTSD,CTSZ,DCBLD2,DDR1,DHRS7B,DNAJC22,DPY19L3,DRAM1,DTNA,EIF2AK3,ELOVL5,ENDOD1,EXT2,FAM171A1,FLNB,FZD2,FZD7,GDNF,GJA1,GLRX3,GNS,GPC1,GTF3C1,GUSB,HBEGF,HGSNAT,HTT,ICMT,IFNAR2,IGF1R,IL6ST,ITGA5,KANSL3,LAPTM4B,LMTK2,LPHN2,LTBP1,LY6E,MFGE8,MFSD1,MGAT1,MINPP1,…	ABCB10,ABCC1,ABCC5,ABHD1,ABHD12,ACPL2,ACTL6A,ACVR1B,ADAM17,ADAR,ADCY6,ADORA2B,ADRB2,AHSA1,AKAP1,ALG12,ALG3,ALG9,AMOTL2,ANGPTL2,ANKH,ANKLE2,ANKRD11,ANO10,ANO6,AP2A2,APLP2,APMAP,AQP1,ARFGAP3,ARHGAP23,ARID1A,ATF6B,ATG16L1,ATG9A,ATP10A,ATP10D,ATP11A,ATP13A1,ATP1A1,ATP2A2,ATP5G2,ATP6AP1,ATP6V0A1,ATP6V0A2,ATP6V0B,AXL,B3GALT6,B3GAT3,B4GALT1,B4GALT5,BAIAP2,BCAP31,BICD2,BMP1,BOP1,BSG,BTD,BTG2,C14orf1,C16o…
MSigDB Perturbation	ZIRN_TRETINOIN_RESPONSE_WT1_UP	Genes up-regulated in MZ128 cells (Wilms tumor with mutated WT1 [GeneID=7490]) after treatment with 10 microM tretinoin (ATRA) [PubChem=444795] for 24 h.	48	9.3859e-06	0.0315742	0.000657795	2.8188	8.15949	23	249	0.0100524	0.0923695	10	23	23	15,28,113,117,128,145,174,210,332,371,419,474,624,721,823,1055,1142,1576,1852,2081,2189,2659,2710	15,28,113,117,128,145,174,210,332,371,419,474,624,721,823,862,1055,1142,1576,1852,2081,2189,2659,2710,2875,3171,3617,3676,3799,3834,3838,4148,4160,4405,4673,4824,4850,4915,5365,5534,6098,6473,7661,7992,8768,8897,8911,9341,9750,9788,10427,11191,11610,11857,12010,12023,12114,12285,12326,12346,12684,12779,13070,15295,15735,15845,16031,16910,17211,17297,17776,18074,18096,18181,18557,18740,19658,19827…	AKAP12,CLDN11,COTL1,DHRS3,ETV1,ITGA1,KANSL3,RARB,RARRES1,SMAD3	AKAP12,CAPN7,CD109,CLDN11,COTL1,DHRS3,DLC1,ETV1,GDE1,IGFBP3,IGFBP6,ITGA1,KANSL3,KIT,NAV2,PDGFRA,PLAUR,RARB,RARRES1,SMAD3,SNX8,TAL1,ZNF133
MSigDB Perturbation	HATADA_METHYLATED_IN_LUNG_CANCER_DN	Genes with unmethylated DNA in lung cancer samples.	49	9.46727e-06	0.0318479	0.000649957	3.08249	6.48827	20	198	0.00874126	0.10101	7	26	30	8.20831e+68	8,208,308,498,520,555,604,764,965,1338,1553,1766,1819,1904,1945,2134,2281,2308,2601,2617,2720,3038,3221,3228,3322,3574,3807,3966,4130,4224,4739,4817,5281,5491,5689,6031,6739,7749,8196,8835,8915,8991,9522,9989,10723,10935,11757,11858,12324,14307,14343,14679,14862,14878,15128,15267,15352,17586,17643,17708,17814,17876,18881,19086,19565,19948,20647,20858,21468,22192,23326,23434,23940,25650,27045,2713…	CCDC169-SOHLH2,ELF3,FRMD4A,LAMA3,MELK,OR13A1,ZNF572	BEST2,CCDC169-SOHLH2,DLGAP4,ELF3,ENSG00000171282,FRMD4A,IGFLR1,INSL6,JAK3,KIF2B,LAMA3,MEFV,MELK,MKRN3,MYT1L,NGEF,NLRP10,NLRP11,NTF3,OR13A1,PRAME,RNF175,SHISA7,TRIM29,ZNF556,ZNF572
MSigDB Perturbation	FULCHER_INFLAMMATORY_RESPONSE_LECTIN_VS_LPS_UP	Genes up-regulated in monocyte-derived dendritic cells (MDDC) after stimulation with galecin-1 (lectin, LGALS1) [GeneID=3956] compared to that with bacterial lipopolysaccharide (LPS).	50	1.00561e-05	0.0338286	0.000676572	1.32452	170.628	226	5207	0.0987762	0.0434031	136	551	558	6,17,21,25,33,37,42,54,70,92,107,110,129,131,136,140,163,170,171,185,191,193,217,219,222,228,231,244,249,252,258,265,267,275,277,288,291,299,301,307,329,350,354,360,368,369,396,397,401,408,414,426,443,447,470,473,485,489,495,503,527,540,544,552,553,554,562,569,578,594,595,599,603,608,627,628,650,653,654,659,666,668,677,687,701,715,718,731,733,736,742,744,766,769,774,778,789,803,829,835,871,881,89…	6,17,21,25,33,37,42,54,70,92,107,110,129,131,136,140,163,170,171,185,191,193,217,219,222,228,229,231,244,249,252,258,265,267,275,277,288,291,299,301,307,329,350,354,360,368,369,396,397,401,408,414,426,443,447,470,473,485,489,495,503,519,527,540,544,552,553,554,562,569,578,594,595,599,603,606,608,627,628,638,650,653,654,659,666,668,677,687,701,715,718,731,733,736,742,744,766,769,774,778,789,803,82…	ABHD2,ACER3,ACTN1,ADAM19,ADTRP,AHCYL1,ALCAM,ASAP1,ATP2A3,AUH,B3GALNT1,B3GNT5,BCAR3,BCAT1,CALM1,CCL24,CCL26,CD40,CD55,CD93,CDC42SE2,CERS6,CFP,CLEC4A,CLEC4G,CMIP,COMMD1,COMMD7,COX18,CSF1,CSRP1,DOCK5,DUSP4,DUSP6,EDN1,EFCAB14,ENTPD4,EVI2A,FAM101B,FAM162A,FAM69A,FAR2,FBXL4,FCER2,FCGR1B,FMNL2,FNDC3A,GADD45G,GALNT12,GFOD1,GOT2,GPR157,GPR35,GSR,HBEGF,HCAR3,HIP1,HIPK2,HNRNPLL,HPS3,IL1A,IL1B,IRF4,ITPR1,KIF…	ABCC1,ABCC3,ABHD2,ABL2,ACER3,ACO1,ACOT7,ACSL3,ACSL5,ACTN1,ADAM12,ADAM19,ADAM8,ADTRP,AGPAT9,AGTRAP,AHCYL1,AK4,AK8,AKIRIN1,AKR1C1,AKR1C2,AKR1C3,ALCAM,ALG2,ALOX15,ALOX15B,ANAPC16,ANP32A,AQP3,ARHGAP10,ARHGAP22,ARPC5L,ASAP1,ASPH,ATP1B1,ATP2A3,ATP2C1,AUH,B3GALNT1,B3GNT5,BATF3,BCAR3,BCAT1,BHLHE41,BID,BIRC3,BOLA3,BTG2,BZW2,C10orf128,C11orf31,C11orf73,C17orf89,C19orf59,C1orf54,C21orf33,C3,C7orf73,C9orf89,…
MSigDB Perturbation	APPEL_IMATINIB_RESPONSE	Genes up-regulated by imatinib [PubChem=5291] during dendritic cell differentiation.	51	1.17659e-05	0.0395804	0.000776085	2.85687	7.70073	22	235	0.00961539	0.093617	13	33	33	2.12278e+73	212,278,300,382,432,434,560,576,709,752,848,922,988,996,1396,1486,1919,1997,2081,2125,2413,2472,2561,2763,2991,3053,3099,3283,3571,3982,4836,5058,5670,5709,6248,6359,6794,7350,7478,7653,7655,7793,8254,8300,8544,8735,8798,8911,9788,9936,10265,10512,10663,10862,11191,11212,11295,11556,12017,12209,13355,13754,13830,13843,15739,16069,16096,16526,16564,16879,17062,17629,18111,18133,18181,18437,19016,1…	ACP5,CD300A,CTSB,CTSD,CTSZ,FUCA1,GM2A,GNS,GUSB,LAMP2,LILRB3,PLD1,RARRES1	ACP5,APOC1,APOD,APOE,ASAH1,C5AR1,CD163,CD300A,CD68,CTSA,CTSB,CTSD,CTSH,CTSL,CTSZ,ENG,FUCA1,GBA,GM2A,GNS,GUSB,HEXA,HEXB,LAMP1,LAMP2,LILRB3,MSR1,NEU1,OSBPL3,PLD1,PLSCR1,PPARG,RARRES1
MSigDB Perturbation	TURASHVILI_BREAST_NORMAL_DUCTAL_VS_LOBULAR_UP	Genes up-regulated in normal ductal and normal lobular breast cells.	52	1.1836e-05	0.0398163	0.000765698	2.22517	15.7291	35	480	0.0152972	0.0729167	18	62	63	14,30,81,95,158,225,240,356,485,517,626,723,739,861,986,998,1033,1164,1360,1506,1680,1808,1927,1986,2200,2249,2273,2325,2379,2429,2609,2635,2732,2735,2761	14,30,81,95,158,225,240,356,485,517,626,723,739,861,986,998,1033,1107,1164,1360,1506,1680,1808,1927,1986,2200,2249,2273,2325,2379,2429,2609,2635,2732,2735,2761,2799,2869,2931,3113,3219,3276,3567,3994,4040,4385,4454,4464,4557,4814,4895,4922,4967,5068,5209,5331,5484,5553,5673,5802,5849,5894,6054,6241,6288,6506,6575,6602,6636,6854,7017,7043,7182,7311,7333,7378,7431,7454,7456,7904,7916,7980,7986,7999…	ADNP,ATF3,DNAH1,ERI1,FAM49A,GABRP,GALNT3,GLUD2,KLF11,MAFF,MAK16,MAP4K5,MR1,PDE4DIP,PLEKHS1,SMUG1,ST3GAL6,USP25	ACACB,ADNP,ATF3,CCL28,CELF2,CHML,CLCN3,COL27A1,COQ10B,CX3CL1,DBR1,DCAF8,DNAH1,ENSG00000258465,EPPK1,ERI1,EXOSC8,FAM49A,FOSB,FRMD4B,GABRP,GALNT3,GATM,GLUD2,HRSP12,KLF11,KRT23,LRCH3,MAFF,MAK16,MAP4K5,MR1,MTAP,MTMR4,MYO1D,NR4A2,PBLD,PDE4DIP,PHF20L1,PLEKHS1,PMEPA1,PPHLN1,PTX3,RBBP4,RFXAP,RPE,SKP2,SLC25A45,SMAD5,SMG8,SMUG1,SPATA5L1,ST3GAL6,TMPRSS3,TRNT1,USP25,VIPAS39,VPS13B,ZBTB8A,ZNF250,ZNF823,ZSWIM7
MSigDB Perturbation	LU_AGING_BRAIN_UP	Age up-regulated genes in the human frontal cortex.	53	1.23199e-05	0.0414442	0.000781966	1.46282	88.8696	130	2712	0.0568182	0.0479351	69	250	256	6,8,15,17,21,42,63,94,113,119,121,128,142,145,165,174,208,210,212,219,228,236,265,280,283,290,302,307,332,348,351,375,378,399,406,417,419,447,471,473,498,509,515,517,598,619,649,650,656,673,715,744,749,752,778,780,781,825,838,870,930,965,1065,1070,1106,1120,1134,1153,1187,1221,1245,1262,1270,1274,1336,1339,1350,1351,1385,1486,1500,1546,1553,1556,1563,1576,1601,1606,1648,1649,1671,1682,1699,1728,1…	6,8,15,17,21,42,63,94,113,119,121,128,142,145,165,174,208,210,212,219,228,236,265,280,283,290,302,307,332,348,351,375,378,399,406,417,419,447,471,473,498,509,515,517,598,619,649,650,656,673,715,744,749,752,778,780,781,825,838,841,870,930,964,965,1065,1070,1106,1120,1134,1153,1183,1187,1209,1221,1245,1262,1270,1274,1336,1339,1346,1350,1351,1385,1416,1486,1500,1538,1546,1553,1556,1563,1576,1601,160…	ACAA2,ADD3,AFF1,AHCYL1,BAZ2B,BBOX1,BCL2,CAV1,CETN3,CSRP1,DDIT4,DDR1,DHRS3,FGF1,FGF2,FGFR2,FRYL,GJA1,HEBP2,HIF1A,HSD17B6,INSR,LAMP2,LPP,LTBP1,MAOA,MAP3K5,METTL7A,MSN,MTSS1,MYO10,MYOF,NEBL,NEK7,NIPBL,NPC1,NT5C2,NTRK2,PALLD,PCF11,PDE4DIP,PDLIM5,PHF3,PHLPP1,PICALM,PIK3C2A,PMP22,PRDX6,RASSF2,RHOBTB3,RIN2,S1PR1,SEPP1,SEPT10,SEPT4,SFRP1,SNAP23,TGFBR2,TGIF1,TGM2,TIPARP,TMEM123,TMEM47,TOB1,VAMP3,VAT1,VEGF…	ABCD3,ABCG1,ACAA2,ACSBG1,ACTL6A,ADD3,ADIRF,AFF1,AGT,AHCYL1,AHCYL2,AHNAK,ALDH4A1,ALDH9A1,AMOT,AMOTL2,ANP32B,ANXA3,ANXA5,APOD,ASCL1,BAMBI,BAZ2B,BBOX1,BCL2,BMP7,CALD1,CAST,CAV1,CAV2,CBS,CD302,CEBPD,CEP170,CETN3,CHSY1,CLASRP,CLDN5,CLEC2B,CLIC2,CLIC4,CLK1,COL4A5,CPNE3,CREB3L2,CRYAB,CSRP1,CYP1B1,DDIT4,DDR1,DHRS3,DNASE1L1,DPYSL3,ECM2,EFEMP1,EFHD1,ELOVL2,ENSG00000256500,EPM2A,ERBB3,EYA1,FADS1,FERMT2,FGF1…
MSigDB Perturbation	RUAN_RESPONSE_TO_TNF_DN	Adipocyte abundant genes down-regulated in 3T3-L1 cells (fibroblasts induced to differentiate to adipocytes) in response to TNF [GeneID=7124].	54	1.24608e-05	0.041918	0.00077626	2.05072	20.4807	42	625	0.0183566	0.0672	19	82	85	15,18,113,115,128,145,174,181,210,234,253,332,419,459,485,836,879,966,969,982,1136,1164,1267,1290,1323,1576,1592,1865,1927,2000,2130,2189,2230,2234,2256,2309,2325,2429,2502,2643,2735,2754	15,18,113,115,128,145,174,181,210,234,253,286,332,419,430,459,485,836,879,966,969,982,1136,1164,1267,1290,1317,1323,1576,1592,1678,1827,1865,1927,2000,2130,2189,2230,2234,2256,2309,2325,2429,2502,2532,2643,2735,2754,2854,2859,2869,3059,3089,3102,3180,3268,3283,3289,3431,3530,3567,3597,3925,4091,4192,4416,4490,4676,4737,4892,4953,5045,5058,5106,5331,5365,5452,5553,5657,5752,6451,6538,6648,6713,684…	AATK,ABCD2,ACADM,ACSL1,ALAS1,ARAF,ARL4A,CEBPG,COL15A1,DHRS3,HIPK2,IDH1,ITGA6,NRIP1,PEMT,PLA2G6,RNF11,SCARB1,TOB1	AATK,ABCD2,ACADM,ACADS,ACOX1,ACSL1,ADIPOQ,ADRB3,AGT,AK2,ALAD,ALAS1,AOC3,AP3S1,APOC4,AQP7,ARAF,ARL4A,BCKDHA,CBX4,CDKN2C,CEBPA,CEBPG,CFD,CIB2,CIDEC,COL15A1,CPT2,DBI,DGAT1,DHRS3,ECH1,ENTPD5,ESYT1,FABP5,FASN,FXYD1,G0S2,GPAM,HIPK2,HIPK3,HK2,HSD17B4,IDH1,IDH3G,IRX3,ITGA6,LAMA4,LIPE,LPL,LTC4S,ME1,MUT,NFS1,NNMT,NR1H3,NRIP1,ORM1,PC,PCK1,PEMT,PEX11A,PLA2G6,PLIN4,PPARG,PXMP2,QKI,RASD1,REEP5,RETN,RGS2,RNF11,…
MSigDB Perturbation	DELACROIX_RAR_TARGETS_UP	Genes bound by RARG [GeneID=5916] and up-regulated by tretinoin (all-trans retinoic acid, ATRA) [PubChemID=444795] in MEF cells (embryonic fibroblast).	55	1.32019e-05	0.0444112	0.000807477	2.38411	12.5833	30	384	0.0131119	0.078125	13	46	47	1.51131e+100	15,113,128,145,174,210,332,347,419,474,625,630,701,742,793,803,823,912,960,1099,1263,1576,1844,2011,2100,2122,2150,2303,2386,2440,2449,2646,2684,2707,2713,2726,2937,3171,3434,3613,3757,3765,3989,4077,4080,4160,4181,4309,4633,4688,4824,5059,5365,5422,5480,5622,5652,5935,6168,6599,6805,6852,7030,7414,7435,7439,7569,7693,7917,7921,7992,8089,8384,8430,8435,8768,8777,8824,8880,8895,8979,9129,9447,9623…	BHLHE40,CEBPB,CP,CTGF,DHRS3,DUSP6,GSR,HMGA1,PGPEP1,PLEKHB1,PRSS22,RARB,SKIL	AOX1,ATP11A,BHLHE40,BLNK,CA12,CAPN5,CEBPB,CHKA,CP,CRABP2,CTGF,DHRS3,DMP1,DUSP1,DUSP6,ESD,EVX2,FCN1,FGF18,GSR,HMGA1,HOXD12,INMT,JUNB,LIPE,MAST2,MLLT6,MMP2,MRPL34,MSLN,NID1,NUPR1,PGPEP1,PLEKHB1,PRSS22,PRSS8,RARB,SAT1,SKIL,STK11,TCIRG1,TGFB3,TM4SF1,TNFRSF11B,TYK2,ZBP1
MSigDB Perturbation	TRAYNOR_RETT_SYNDROM_DN	Genes down-regulated in primary fibroblasts from Rett syndrom patients who carry mutations inactivating MECP2 [GeneID=4204].	56	1.37066e-05	0.0461089	0.000823374	2.91295	7.20919	21	220	0.00917832	0.0954545	7	18	18	8.91153e+74	89,115,267,401,562,666,836,982,1003,1061,1230,1295,1431,1626,1898,1918,2202,2256,2295,2309,2502,2978,3089,3416,3530,3569,3623,3928,4416,4459,4494,4495,4616,4737,6249,6554,6905,7080,7220,7304,7325,7688,9030,9209,9344,9381,9722,10454,10953,10963,11058,11165,11769,12481,12912,13721,14715,14768,15000,15384,15552,15829,16163,16199,16744,17167,17961,18235,19006,19386,19422,19493,19568,19873,19957,19982…	CDH13,CHCHD10,ITGA6,KLF5,MAB21L1,RUNX1,SEL1L3	AMIGO2,BEX4,CDH13,CHCHD10,COMP,CRIP1,ENPP1,GREM2,IGFBP5,ITGA6,KLF5,MAB21L1,P4HA2,PTPRF,RUNX1,SEL1L3,SLC26A2,TOR4A
MSigDB Perturbation	MCLACHLAN_DENTAL_CARIES_UP	Genes up-regulated in pulpal tissue extracted from carious teeth.	57	1.56513e-05	0.0526508	0.000923698	1.55995	61.5403	96	1878	0.041958	0.0511182	47	228	234	4,15,18,89,104,113,128,145,150,174,193,210,252,253,267,278,321,328,332,335,350,362,368,396,419,461,485,543,544,560,575,603,628,666,668,700,705,709,713,718,734,791,848,885,906,917,966,978,1091,1097,1136,1148,1201,1207,1230,1237,1290,1299,1326,1338,1339,1450,1520,1527,1570,1576,1592,1596,1609,1620,1621,1705,1779,1802,1984,2072,2073,2098,2124,2175,2179,2186,2282,2285,2295,2343,2393,2409,2448,2479,24…	4,15,18,89,104,113,128,145,150,174,193,210,252,253,267,278,286,321,328,332,335,350,362,368,396,419,430,438,461,485,519,543,544,560,575,603,628,666,668,700,705,709,713,718,734,791,848,885,906,917,966,978,1063,1087,1091,1097,1136,1144,1148,1201,1207,1230,1237,1249,1290,1299,1326,1338,1339,1450,1520,1527,1570,1576,1592,1596,1609,1620,1621,1705,1771,1779,1802,1876,1905,1963,1984,2017,2072,2073,2089,2…	ACP5,ACSL1,ADM,ANPEP,CCL5,CCR1,CCR2,CD1D,CD44,CD53,CD55,CD93,CECR1,CHI3L2,CHST15,COL15A1,CTSB,CTSC,CXCL12,EVI2A,EVI2B,FAM49B,HCAR3,HLA-DMB,IER3,IL1B,IRF4,IRF8,LYN,MAFF,MS4A4A,NAMPT,PAX5,PHLDA1,PLEK,PTP4A3,SAMSN1,SEL1L3,SERPINE2,SKAP2,SLA,SLC2A3,SRGN,TNFAIP3,TNFRSF1B,TNFRSF21,TRIB1	ABCA1,ACP5,ACSL1,ADAMDEC1,ADM,AIM1,ALOX5,ALOX5AP,ANGPTL2,ANPEP,APOC1,APOE,AQP3,ARHGDIB,ARPC1B,BCL2A1,BCL3,BIRC3,BLNK,C10orf10,C1QA,C1QB,C1QL1,C3,C3AR1,C5AR1,CA12,CAPG,CCL18,CCL2,CCL5,CCL8,CCR1,CCR2,CD14,CD163,CD1D,CD209,CD27,CD37,CD4,CD44,CD48,CD53,CD55,CD74,CD79A,CD84,CD93,CEBPD,CECR1,CFD,CFI,CHI3L1,CHI3L2,CHL1,CHST15,CKAP2,CLEC2B,CLEC7A,COL15A1,CORO1A,CPVL,CRLF1,CSF1R,CSF2RB,CTSB,CTSC,CTSH,CTSS…
MSigDB Perturbation	GAVIN_FOXP3_TARGETS_CLUSTER_T4	Cluster T4 of genes with similar expression profiles in thymic T lymphocytes after FOXP3 [GeneID=50943] loss of function (LOF).	58	1.57268e-05	0.0529051	0.000912157	1.83634	29.9509	55	914	0.0240385	0.0601751	30	90	90	18,74,78,115,196,214,231,253,337,426,481,514,577,639,652,705,809,836,891,957,971,980,982,1029,1136,1164,1166,1208,1407,1472,1592,1621,1714,1927,1960,2043,2086,2256,2292,2309,2315,2325,2366,2429,2432,2497,2502,2521,2587,2590,2602,2621,2630,2649,2735	18,74,78,115,196,214,231,253,337,426,481,514,577,639,652,705,809,836,891,957,971,980,982,1029,1136,1164,1166,1208,1407,1472,1490,1592,1621,1712,1714,1927,1960,2022,2043,2086,2256,2292,2309,2315,2325,2366,2429,2432,2497,2502,2521,2546,2587,2590,2602,2621,2630,2649,2735,2768,2774,2822,2891,2914,3089,3159,3208,3211,3287,3530,3661,3736,3747,3822,3831,3874,3963,4001,4020,4067,4078,4106,4216,4223,4255,…	ADSS,AHCY,ANKRD17,C3orf80,CD38,CD44,CYFIP1,DENND5A,ENDOD1,IGF1R,INPP5F,IRF4,ITGA6,ITGAE,ITGB8,METTL20,MTHFS,MYC,NRIP1,NUCB2,ODC1,PPM1L,RORA,RRAGD,SMU1,SNX18,SOCS2,STX11,TMEM65,YWHAQ	ADSS,AHCY,AHNAK,ANKRD17,ARF1,ATP10D,BMPR2,BTG2,C3orf80,CAPG,CD38,CD44,CD48,CTLA4,CYFIP1,DENND5A,DRG1,ENDOD1,ENSG00000113811,FAM105B,FAM129A,FAM26F,FOXP3,GLTSCR2,GLUD1,GPX4,GUCY1A3,HINT1,HIPK1,IGF1R,IKZF2,IL1R2,IL2RA,IL2RB,INPP5F,IRF4,ITGA6,ITGAE,ITGAV,ITGB1,ITGB8,KARS,LRIG1,MAF1,METTL17,METTL20,MTHFS,MYC,NOD1,NRIP1,NRP1,NT5E,NUCB2,ODC1,P2RX7,PENK,PLA2G16,PLEKHB2,PLSCR1,PPM1L,PSMB3,PSMD4,PSMD8,RNH…
MSigDB Perturbation	XU_RESPONSE_TO_TRETINOIN_UP	Genes up-regulated in NB4 cells (acute promyelocytic leukemia, APL) by tretinoin [PubChem=444795] alone.	59	1.74238e-05	0.0586137	0.000993453	3.63293	4.1289	15	126	0.00655594	0.119048	9	18	18	8.51404e+52	85,140,417,424,588,973,1366,1370,1372,1536,1979,2000,2076,2288,2740,3098,3657,4411,4447,4540,4925,4932,5431,5694,5837,5922,6177,6844,7130,7183,7210,7842,8552,9932,10219,10308,10329,10569,10783,11021,11023,11708,11740,12268,12392,12578,12587,13114,13832,14060,14845,14989,15385,15690,16594,16854,16901,16959,17492,19030,20106,21069,21961,22005,22188,22218,23185,23281,23592,23936,23947,24082,24677,26…	ADD3,AGO1,ALAS1,ELF4,ITM2B,PGD,PIM1,REL,WIPF1	ADD3,AGO1,ALAS1,CDKN2C,COL9A2,DEFA1,DEFA1B,DEFA3,ELF4,ITM2B,PGD,PIM1,PSMB9,PTK2B,RCBTB2,REL,WAS,WIPF1
MSigDB Perturbation	RUTELLA_RESPONSE_TO_HGF_UP	Genes up-regulated in peripheral blood monocytes by HGF [GeneID=3082].	60	1.82039e-05	0.0612379	0.00102063	1.371	126.915	174	3873	0.076049	0.0449264	95	407	409	2,6,11,16,17,21,37,42,51,54,84,129,150,153,180,196,207,208,212,222,265,275,277,278,284,300,307,360,401,420,434,447,454,471,473,489,517,527,539,541,546,560,562,565,578,584,602,650,658,660,680,705,709,715,716,734,742,744,752,756,766,778,783,803,835,848,865,921,922,951,961,988,1012,1013,1022,1035,1061,1067,1077,1086,1097,1100,1102,1105,1106,1122,1134,1143,1159,1178,1207,1221,1232,1241,1262,1270,1286…	2,6,11,16,17,21,37,42,51,54,84,129,150,153,180,196,207,208,212,222,265,275,277,278,284,300,307,360,387,401,420,434,447,454,471,473,489,517,527,539,541,546,560,562,565,578,584,602,650,658,660,680,705,709,715,716,734,742,744,752,756,766,778,783,803,835,845,848,865,921,922,934,951,961,988,1012,1013,1022,1035,1061,1067,1077,1086,1087,1097,1100,1102,1105,1106,1122,1134,1143,1159,1178,1207,1221,1232,12…	ACAA2,ACAT1,ACKR5,ACP5,ALAS1,AQP9,ARFGAP3,ATP1B3,ATP6V1C1,ATP6V1H,ATP9B,B4GALT5,BCAT1,CCR1,CCR5,CD2AP,CD80,CERS6,CHST15,COL4A3BP,CPD,CSRP1,CTSB,CTSD,CYB5A,CYP27A1,DNAJB6,EED,EPB41L2,FAM69A,FBP1,GADD45G,GM2A,GNS,GOT2,GRSF1,GSR,IL18,IL1A,IL1B,IL21R,IL6ST,IRF4,ITPR1,JAK1,LAMP2,LHFPL2,LPAR1,LYPD3,MAOA,MARCKS,MCM5,MCTP1,MPZL1,MTX2,MYOF,NCOA3,NPC1,PDE4DIP,PLXNA1,PPAP2B,PPIF,PSEN2,RAB20,RAB38,RAB9A,RARR…	ABCC3,ABCG1,ACAA2,ACAT1,ACKR5,ACO1,ACP5,ACSL3,ADAM12,ADAM28,ADAMDEC1,ADRBK2,AKR1B1,AKR1C1,AKR1C2,AKT3,ALAS1,ALDH3A2,ANXA2,ANXA5,APOC1,APOE,APOO,AQP9,ARFGAP3,ARHGAP22,ARL6IP5,ASAH1,ASMTL,ATP13A3,ATP1B3,ATP6V0A1,ATP6V0E1,ATP6V1C1,ATP6V1H,ATP9B,B4GALT5,BCAP31,BCAT1,BET1,BHLHE41,BIRC3,C1QA,C1S,C3,C3AR1,C3orf18,C6orf106,CALHM2,CASP3,CCL13,CCL17,CCL18,CCL19,CCL2,CCL22,CCL8,CCND1,CCR1,CCR5,CCR7,CCSER2,C…
MSigDB Perturbation	MATZUK_EARLY_ANTRAL_FOLLICLE	Genes important for early anral follicle, based on mouse models with female fertility defects.	61	1.8765e-05	0.0631256	0.00103484	3.15689	5.70181	18	174	0.00786713	0.103448	9	13	13	1.0211e+64	102,110,462,499,504,629,677,1172,1194,1271,1542,1772,1792,1814,1910,2290,2359,2482,2677,3286,3346,3798,4087,4536,4971,5125,5479,5742,6243,6449,6526,6881,7213,7301,8975,9131,9251,9520,9584,9965,10193,10372,10457,10476,10547,10628,11052,11730,13132,13363,13382,13399,13620,13676,14242,14486,14501,14597,14799,14914,15106,16353,16580,18422,18943,19042,19372,21095,21545,21561,21771,22132,22502,22704,22…	AHR,CCND2,IGF1,NOS1,NR2C2,PCYT1B,SRC,THBS1,UBE3A	AHR,CCND2,DDR2,FSHR,IGF1,NOS1,NR2C2,PCYT1B,SH2B1,SRC,TAF4B,THBS1,UBE3A
MSigDB Perturbation	KASLER_HDAC7_TARGETS_1_UP	Genes up-regulated in DO11.10 cells (hybridoma) by expression of transciptionally activating form of HDAC7 [GeneID=51564] and down-regulated by its transcriptionally repressing form.	62	2.05593e-05	0.0691615	0.00111551	1.59249	54.0034	86	1648	0.0375874	0.0521845	37	184	189	8,37,39,118,190,191,214,222,223,270,276,300,320,364,401,449,461,485,498,562,569,585,616,632,642,703,765,766,817,824,827,829,899,913,922,965,978,988,1022,1052,1061,1077,1103,1143,1187,1308,1325,1404,1431,1450,1465,1501,1529,1531,1553,1556,1579,1626,1819,1852,1898,1904,1919,1921,1988,1997,2091,2128,2175,2281,2283,2297,2317,2337,2445,2477,2521,2535,2558,2579,2601,2610,2623,2654,2696,2718	8,37,39,118,190,191,214,222,223,270,276,300,320,364,401,449,461,485,498,562,569,585,616,632,642,703,765,766,817,824,827,829,868,899,913,922,965,978,988,1022,1052,1061,1077,1103,1143,1187,1302,1308,1325,1345,1396,1402,1404,1428,1431,1450,1465,1501,1529,1531,1553,1556,1579,1626,1651,1678,1759,1819,1852,1898,1904,1919,1921,1988,1997,2027,2089,2091,2108,2128,2162,2175,2281,2283,2297,2313,2317,2337,24…	AGPAT6,AKAP12,ARHGEF2,ASB2,ASB6,BCL2,BCL6,BCOR,CAPN3,CLSTN1,DNMT3A,DUSP10,ELK3,FRYL,GALC,GM2A,IRF4,MARCH3,MFGE8,MIER2,MTSS1,NCOA3,PIK3CD,PKP3,PLA2G6,POC1A,RASSF3,RNF187,RPS6KA1,RUNX1,SESN3,SSR2,ST3GAL5,TMEM57,TRIB1,UGCG,WDR82	ABCB9,ABHD8,AEN,AGPAT6,AHSG,AKAP1,AKAP12,ANKRD23,AP1M1,ARHGAP27,ARHGEF2,ASB2,ASB6,ASB8,ATP2A2,B4GALT1,B4GALT3,BCL2,BCL6,BCOR,BMP4,BPGM,BVES,C10orf128,C12orf52,C2CD2L,C5,CAP1,CAPN3,CAPN7,CCR4,CCR8,CD247,CD28,CD6,CD96,CDH17,CDK2,CHST10,CHST2,CLPTM1,CLSTN1,CNNM3,CPEB1,CTU2,CUTA,CYFIP2,CYP20A1,CYTIP,DAD1,DAPK3,DDX19B,DDX21,DFFB,DGKZ,DNMT3A,DUSP10,DUSP2,ELK3,ENDOU,ERP29,FASN,FBXW11,FGD2,FILIP1L,FRYL,F…
MSigDB Perturbation	DEBIASI_APOPTOSIS_BY_REOVIRUS_INFECTION_UP	Genes up-regulated in HEK293 cells (embryonic kidney) at 6 h, 12 h or 24 h after infection with reovirus strain T3A (known as a strong inducer of apoptosis).	63	2.12303e-05	0.0714186	0.00113363	1.45263	87.4278	127	2668	0.055507	0.0476012	73	304	316	14,18,33,62,81,96,156,181,201,205,220,225,226,240,248,253,263,279,318,319,328,347,375,378,409,423,449,488,500,537,544,556,610,625,628,630,651,662,718,742,758,793,846,882,891,893,902,919,928,933,935,989,1020,1033,1046,1065,1136,1164,1165,1167,1180,1211,1229,1263,1273,1324,1327,1372,1399,1495,1500,1506,1519,1520,1530,1536,1556,1592,1596,1598,1679,1680,1749,1802,1805,1843,1927,1955,1970,1986,2015,20…	14,18,33,62,81,96,156,181,201,205,220,225,226,240,248,253,263,279,318,319,328,347,375,378,409,423,449,488,500,537,544,556,610,625,628,630,651,662,718,742,758,793,830,841,846,882,891,893,902,919,928,933,935,989,1020,1033,1046,1065,1087,1098,1136,1164,1165,1167,1180,1211,1229,1263,1273,1304,1324,1327,1372,1399,1495,1500,1506,1519,1520,1530,1536,1538,1556,1592,1596,1598,1654,1664,1679,1680,1749,1802…	ADM,AKAP10,ANAPC10,ATF1,ATF3,BACH1,BAZ2B,BCL6,BHLHE40,BUB3,CASP7,CCDC6,CCL5,CD2AP,CD55,CDC27,CEBPB,CEBPG,CETN3,CTGF,DHRS2,DNAJB6,DTNA,FGF2,FGF9,GADD45A,GINS1,GNAQ,H1F0,HOXA5,IFI35,KIN,KLF6,KRR1,MAK16,MAP4K5,MED13L,MED21,MKLN1,NECAP1,NEK7,NR3C1,NRIP1,OTUD4,PEX13,PGGT1B,RAD51AP1,RBMS1,RCAN1,RLF,RND3,RRAS2,RYBP,SAMHD1,SIKE1,SLC2A3,SNAPC1,SOCS6,SP110,SPRY1,TBPL1,TIPARP,TM2D1,TMCC1,TNFAIP3,UBE2D1,UBE2…	ABI2,ADM,AGFG1,AK2,AKAP10,ANAPC10,ANXA1,ARHGAP5,ARPP19,ATF1,ATF3,ATF6,ATXN3,BACH1,BAZ2B,BCL10,BCL2L2,BCL6,BET1,BHLHE40,BLZF1,BNIP1,BRAP,BRCA1,BST2,BTG3,BUB3,CAP2,CAPZA2,CASP3,CASP7,CCDC6,CCL5,CCNE2,CCP110,CD2AP,CD55,CDC27,CDK17,CEBPB,CEBPG,CELF1,CETN3,CGA,CHEK1,CLK1,CLK3,COPS2,CPEB3,CREB5,CREBZF,CREM,CRK,CTGF,CXCL1,CXCL10,CXCL11,CXCL2,CYR61,DCTN6,DDIT3,DHRS2,DHX9,DNAJB6,DNAJB9,DNAJC2,DTNA,DUSP1,D…
MSigDB Perturbation	PAPASPYRIDONOS_UNSTABLE_ATEROSCLEROTIC_PLAQUE_UP	Genes up-regulated in unstable ateroslerotic plaques compared to the stable ones.	64	2.28431e-05	0.0768443	0.00120069	2.18435	15.5653	34	475	0.0148601	0.071579	18	52	52	18,89,96,253,267,278,382,459,466,560,567,666,672,700,701,709,848,1136,1139,1230,1384,1570,1592,1758,1779,1942,1997,2081,2165,2230,2295,2632,2684,2763	18,89,96,253,267,278,382,459,466,560,567,666,672,700,701,709,830,848,1136,1139,1230,1247,1384,1570,1592,1758,1779,1942,1997,2081,2165,2230,2295,2632,2684,2713,2763,2991,3025,3053,3099,3396,3720,3851,3956,3958,4077,4306,4324,4459,4832,4988,5122,5149,5231,5514,5535,5669,5670,5854,6056,6122,6159,6201,6263,6413,6603,6777,6808,7087,7320,7372,7414,7581,7704,7773,7793,7917,7955,8241,8277,8330,8426,8428,…	ACP5,CTSB,DUSP6,FUCA1,GM2A,IDH1,LGMN,MPEG1,MS4A4A,PAPSS2,RAPGEF1,RARRES1,RBMS1,SAMSN1,SEL1L3,SIGLEC15,SLC17A5,SRGN	ACP5,ATP2B1,BAZ1A,CCL18,CD163,CD84,CREG1,CSF2RB,CTSB,CTSS,CXCL2,DAB2,DUSP6,F11R,FUCA1,GALE,GLUL,GM2A,GRN,HLA-G,IDH1,IFI30,IFIT3,LAMP1,LGMN,MLEC,MPEG1,MS4A4A,NCKAP1L,NPL,PAPSS2,PLA2G7,PLEKHB2,RAPGEF1,RARRES1,RBMS1,RGCC,RNASET2,RPN2,RSAD2,SAMSN1,SAT1,SEL1L3,SGK1,SIGLEC15,SLC17A5,SLC39A8,SOD2,SRGN,TDP2,TRAK2,TRAM1
MSigDB Perturbation	DE_YY1_TARGETS_UP	Genes up-regulated in SaOS-2 cells (osteosarcoma) upon knockdown of YY1 [GeneID=7528] by RNAi.	65	2.36481e-05	0.0795523	0.00122388	3.10338	5.80012	18	177	0.00786713	0.101695	6	26	32	8,48,106,305,498,732,965,1223,1480,1553,1605,1819,1904,2082,2085,2281,2601,2664	8,48,106,305,498,637,732,965,1223,1480,1553,1605,1819,1904,2082,2085,2281,2601,2664,2772,2933,2991,3038,3221,3322,3362,3574,3667,3683,3786,4032,4050,4250,4368,4495,4842,5244,5256,6041,6050,6059,7319,7438,7458,8196,8264,8950,9199,9559,10343,10495,11175,12009,12019,12672,12697,14029,14343,14768,16185,16744,16795,16879,17335,17842,17850,17876,19032,19321,19422,19461,19559,19641,19712,19731,19829,199…	DAPK2,L3MBTL1,MTSS1,NGFR,SMPD3,TRIM31	CDKN1C,CHIT1,CNR2,CSF2,DAPK2,EMP1,GPX5,HIST1H4A,HIST1H4C,HIST1H4E,HIST1H4H,HIST1H4I,HIST1H4J,HIST1H4L,HIST4H4,IL19,L3MBTL1,MTSS1,NGFR,NPY,PRSS16,RFC1,SMPD3,TACSTD2,TRIM31,WNT1
MSigDB Perturbation	COULOUARN_TEMPORAL_TGFB1_SIGNATURE_UP	'Late-TGFB1 signature': genes overexpressed in primary hepatocytes at a late phase of TGFB1 [GeneID=7040] treatment; is associated with a more invasive phenotype.	66	2.49157e-05	0.0838165	0.00126995	1.72891	36.4392	63	1112	0.027535	0.0566547	30	102	106	15,26,52,91,113,115,128,136,145,174,210,244,290,332,411,419,509,510,594,630,672,673,722,733,742,793,836,880,982,1004,1069,1215,1218,1236,1241,1263,1339,1379,1382,1384,1452,1515,1525,1576,1686,1691,1696,1717,1797,1811,1873,1881,1935,1939,2100,2122,2256,2298,2309,2502,2551,2627,2726	15,26,52,91,113,115,128,136,145,174,210,244,290,332,411,419,509,510,594,630,672,673,722,733,742,793,836,880,982,1004,1069,1094,1107,1215,1218,1236,1241,1252,1263,1339,1379,1382,1384,1452,1474,1515,1525,1576,1686,1691,1696,1717,1797,1811,1873,1881,1935,1939,2013,2100,2106,2122,2127,2178,2256,2298,2309,2314,2433,2502,2551,2627,2726,2774,2813,2874,2929,3089,3168,3243,3339,3341,3520,3530,3541,3559,36…	BHLHE40,BTG1,C9orf72,CPD,CSNK1E,CTGF,DDIT4,DDR1,DUSP4,EPG5,IER3,IKBKE,ITGA6,KCTD3,LGMN,LPGAT1,NAB1,PICALM,RBM47,RPS6KC1,SERPINE1,SKIL,SLC29A1,SMURF2,SOX4,SOX9,TBC1D1,TBCEL,TGIF1,TNFRSF1B	AFP,ALS2,AMD1,ARHGAP29,ASNS,BCL2L14,BCL3,BHLHE40,BTG1,C9orf72,CEP192,CHMP4C,CLDN4,CLIC4,CPD,CSNK1E,CTGF,CXCL1,CXCL10,DDIT4,DDR1,DUSP4,EMD,ENSG00000091436,EPG5,ERGIC1,EXOC7,FCHO2,FGD6,FOSL2,FOXQ1,GGA3,GJA5,GNG13,GRB7,GTSE1,HMBS,HMGXB4,HSPA4,IDI1,IER3,IFNGR1,IKBKE,IMPACT,IQGAP1,ITGA6,KCTD3,LGMN,LIMA1,LMO7,LPGAT1,MAML2,NAB1,NCS1,NET1,NFE2L2,NGF,NRP1,PALMD,PDCD10,PDGFA,PDLIM7,PICALM,PIGH,PIP4K2B,PLAT…
MSigDB Perturbation	GROSS_HYPOXIA_VIA_ELK3_DN	Genes down-regulated in SEND cells (skin endothelium) at hypoxia with ELK3 [GeneID=2004] knockdown by RNAi.	67	2.67554e-05	0.0900052	0.00134336	1.55837	58.3944	91	1782	0.0397727	0.0510662	54	155	155	18,33,60,76,94,115,119,171,212,253,255,347,368,396,410,481,552,556,599,625,630,662,668,673,699,705,742,752,758,781,793,825,836,843,874,982,1008,1091,1110,1136,1180,1192,1237,1242,1263,1274,1301,1306,1350,1486,1530,1561,1570,1592,1609,1621,1637,1648,1672,1706,1728,1762,1779,1797,1803,1842,1852,1924,1935,1984,1986,2028,2094,2100,2111,2122,2163,2168,2181,2229,2256,2266,2309,2344,2443,2486,2502,2590,…	18,33,60,76,94,115,119,171,212,253,255,347,368,396,410,481,519,552,556,599,625,630,662,668,673,699,705,742,752,758,781,793,825,836,843,845,874,934,949,982,1008,1091,1094,1110,1115,1136,1180,1192,1237,1242,1263,1274,1301,1306,1350,1380,1486,1530,1561,1570,1592,1609,1621,1637,1648,1672,1706,1728,1739,1762,1771,1779,1797,1803,1842,1852,1924,1935,1984,1986,2004,2013,2028,2094,2100,2106,2111,2122,2163…	ACBD3,ACSL4,ADIPOR2,ADM,AFF1,AKAP12,ANKRD1,ANPEP,APBA3,ATF1,ATF3,BHLHE40,CD44,CD93,CDC42EP3,CEBPB,CTGF,DUSP4,DZIP3,EDN1,ENO1,FST,GADD45A,GJA1,HBEGF,ITGA6,KLF4,KLF6,LAMP2,LHX9,MYC,MYH9,NEDD9,PDLIM5,PFKFB3,PLEK,RAD23B,RBPJ,RCAN1,RPS6KA5,SAMSN1,SKIL,SLC2A1,SMOX,SPRY2,SRGN,TGIF1,THBD,TIAM2,TSHZ1,TXNL1,UPP1,VEGFA,ZNF330	ACAP2,ACBD3,ACSL4,ADIPOR2,ADM,AFF1,AKAP12,ALDH1L2,ANGPTL6,ANKRD1,ANPEP,APBA3,ASCC2,ASNS,ATF1,ATF3,ATF4,ATXN2L,BCL10,BHLHE40,C10orf10,C3,C8orf4,CACNA1H,CARS,CCL2,CCRN4L,CD44,CD93,CDC42EP3,CEBPB,CHIC2,CSF3,CSRNP1,CTGF,CTH,CXCL1,CXCL10,CXCL2,CXCL6,CYR61,DHRS9,DMP1,DUSP2,DUSP4,DZIP3,EDN1,EGR1,EHF,ENO1,EPRS,EPS15,ERO1L,ERRFI1,ETS1,FGB,FGD6,FOS,FST,GADD45A,GBE1,GJA1,GSPT2,GZF1,HAX1,HBEGF,HIGD1A,HILPDA,…
MSigDB Perturbation	CHICAS_RB1_TARGETS_CONFLUENT	Genes up-regulated in confluent IMR90 cells (fibroblast) after knockdown of RB1 [GeneID=5925] by RNAi.	68	2.77617e-05	0.0933904	0.00137339	1.30174	175.15	228	5345	0.0996503	0.0426567	128	528	544	5,6,7,8,12,15,17,19,21,42,47,49,66,76,77,82,83,98,110,113,115,116,117,121,125,128,135,145,146,148,157,160,163,165,174,210,211,219,230,233,238,250,263,265,275,277,307,309,332,333,354,371,398,399,403,419,425,444,447,449,460,465,473,493,498,499,504,510,534,592,600,602,614,630,643,650,656,677,682,684,705,715,719,721,729,735,741,744,759,778,791,793,807,829,836,844,890,913,958,965,966,982,1002,1011,101…	5,6,7,8,12,15,17,19,21,42,47,49,66,76,77,82,83,98,110,113,115,116,117,121,125,128,135,145,146,148,157,160,163,165,174,210,211,219,230,233,238,250,254,263,265,275,277,286,307,309,332,333,354,371,398,399,403,419,425,430,438,444,447,449,456,460,465,473,493,498,499,504,510,534,592,600,602,614,630,643,650,656,677,682,684,705,715,719,721,729,735,741,744,759,778,791,793,807,829,836,844,845,862,890,913,9…	ADAM19,ADH1B,AFF3,ANO1,ANPEP,APCDD1,ARL4A,ATP2B4,ATP6V0E2,BAALC,C10orf54,CADM1,CAMK2D,CAPZB,CAV1,CD44,CDC42EP3,CDH6,CHN1,CLDN11,COL15A1,COL5A1,COTL1,CXCL12,CYB5A,DCN,DHRS3,DIAPH3,EHD2,EPB41L2,EPG5,EPHA4,F2RL1,FAM69A,FOXL1,FRY,FZD2,GMDS,GPC1,GPR126,HELLS,HIC1,HIVEP3,HMGA1,ICA1,IDH2,ITGA4,ITGA5,ITGA6,KCNMB2,LACTB,LIMD1,LOXL2,LPP,LY6E,MAB21L2,MAP1B,MAP3K7CL,MATN2,MCM5,MDK,MECOM,MELK,METTL7A,MFGE8,MO…	ABAT,ABHD12,ABI3BP,ACOT7,ACTA2,ACTB,ACTG2,ACTN4,ADAM19,ADAMTS2,ADAMTS8,ADD1,ADH1B,AFF3,AGA,AHNAK,AK1,AK5,ALDH1A3,ALPK2,ANGPTL2,ANKRD13A,ANO1,ANO4,ANPEP,ANXA1,ANXA2,ANXA6,APCDD1,APOBEC3B,APOL6,AQP3,ARHGAP1,ARHGAP18,ARID5B,ARL4A,ARL4C,ARNT2,ARRB1,AS3MT,ASNS,ASS1,ATP2B4,ATP6V0E1,ATP6V0E2,ATP8B1,AXL,B3GALT2,BAALC,BACE2,BCL7C,BGN,BLVRB,BMP4,BMPER,BRIP1,C10orf10,C10orf54,C12orf39,C18orf54,C1R,C1S,C7,CA…
MSigDB Perturbation	DITTMER_PTHLH_TARGETS_UP	Genes up-regulated in MDA-MB-231 cells (breast cancer) after knockdown of PTHLH [GeneID=5744] by RNAi.	69	2.92876e-05	0.0985233	0.00142788	1.81728	29.1644	53	890	0.0231643	0.0595506	23	112	114	58,59,84,153,260,324,377,420,427,463,568,584,623,635,647,742,810,876,907,961,1024,1039,1050,1113,1263,1284,1286,1322,1336,1395,1432,1505,1629,1743,1823,1869,1881,1885,2019,2065,2088,2100,2122,2235,2246,2382,2388,2408,2484,2490,2607,2636,2708	58,59,84,153,260,324,377,420,427,463,568,584,623,635,647,742,810,845,876,907,934,961,1024,1039,1050,1113,1117,1263,1284,1286,1322,1336,1395,1432,1505,1585,1629,1743,1823,1869,1881,1885,2019,2065,2088,2100,2122,2235,2242,2246,2382,2388,2408,2484,2490,2607,2636,2708,2879,2898,2906,2982,3311,3518,3596,3759,3826,3888,3892,3907,4062,4166,4328,4357,4369,4386,4431,4576,4669,4881,5107,5149,5159,5192,5288…	AP2M1,ARF4,ATPIF1,BHLHE40,COL4A2,CPD,CTNNB1,DLG1,F2RL1,GALNT7,H1F0,H2AFZ,KDM5B,LTBP1,MARCKS,PPAP2B,RBM39,RBX1,RHEB,SEC14L1,SRSF3,TBC1D8,VDAC2	ANXA1,ANXA11,ANXA5,ANXA7,AP1S1,AP2M1,AP2S1,AREG,AREGB,ARF4,ATP10D,ATP1A1,ATP2B1,ATP5A1,ATP5J,ATPIF1,B4GALT3,BHLHE40,BSG,CAPZA2,CDC25B,CDCA3,CDCP1,CDK1,CDK12,CKS2,COL4A2,COL6A1,CPD,CST4,CTNNB1,CYCS,DLG1,DUSP5,ECM1,ENSG00000256500,F2RL1,FAT1,FLOT1,GALNT7,GNAI3,GPX4,GRB10,GRHPR,H1F0,H2AFZ,HADHA,HAX1,HNRNPH1,HSD17B11,IMMT,JAG1,KDM5B,KLC1,KLF9,LAMA5,LAMP1,LARP6,LIPA,LRP5,LTBP1,MARCKS,MFN2,MSRB1,NDUFA1…
MSigDB Perturbation	BUYTAERT_PHOTODYNAMIC_THERAPY_STRESS_UP	Genes up-regulated in T24 (bladder cancer) cells in response to the photodynamic therapy (PDT) stress.	70	2.99305e-05	0.100686	0.00143837	1.26232	221.814	280	6769	0.122378	0.0413651	176	774	789	10,15,16,31,33,36,37,54,55,58,60,72,85,92,94,96,113,128,145,148,166,169,172,174,181,187,191,194,201,205,207,208,210,222,235,249,252,255,258,261,268,281,288,290,299,324,328,332,341,343,347,364,375,378,386,396,403,407,409,417,419,436,449,451,461,462,467,482,485,493,495,509,510,517,528,537,544,552,556,563,567,577,580,581,586,608,615,620,625,628,635,639,640,646,656,662,672,676,699,701,718,722,728,742…	10,15,16,31,33,36,37,54,55,58,60,72,85,92,94,96,113,128,145,148,166,169,172,174,181,187,191,194,201,205,207,208,210,222,235,249,252,255,258,261,268,281,288,290,299,324,328,332,341,343,347,364,375,378,386,396,403,407,409,417,419,436,449,451,461,462,467,482,485,493,495,509,510,517,519,528,537,544,552,556,563,567,577,580,581,586,608,615,620,625,628,635,639,640,646,656,662,672,676,688,699,701,718,722…
,55562,55573,55574,55578,55580,55585,55591,55594,55606,55608,55609,55613,55618,55619,55630,55631,55632,55636,55640,55644,55645,55660,55685,55695,55697,55702,55717,55726,55731,55733,55741,55743,55790,55804,55814,55819,55822,55839,55855,55856,55898,55932,55936,55943,55955,56024,56028,56043,56045,56067,56081,56086,56092,56099,56113,56131,56132,56137,56140,56156,56169,56181,56191,56216,56227,56228,56…	ABI1,ACBD3,ACVR1,ACVR1B,AGO3,AHI1,AHR,AMPD3,AP3S2,ARFGAP3,ARFGEF2,ARHGAP12,ARHGEF2,ARHGEF3,ARHGEF7,ARL8B,ATF2,ATF3,ATP2B4,ATP6V1C1,BACH1,BAG3,BAZ2B,BHLHE40,BMP2,BTG1,CD55,CDK19,CDKN1A,CDKN2AIP,CEBPB,CEBPG,CENPJ,CHAC1,CITED2,CNOT4,CTNS,DAAM1,DDIT4,DHRS3,DNAJA1,DNAJB6,DSE,DUSP10,EIF1,EIF2AK3,EP300,EZH1,F2RL1,FEM1C,FGF2,FZD7,GADD45A,GCLC,GDF15,GNPDA1,GOLGA5,GSE1,GTF2IRD1,HERC4,HIC2,HIVEP1,HIVEP2,HSF…	AADAC,AARS,ABCA1,ABCC5,ABHD3,ABHD5,ABI1,ABL2,ABTB2,ACBD3,ACVR1,ACVR1B,ACVR2A,ADAM17,ADAMTS5,ADCY7,ADNP2,AFF4,AGO3,AHI1,AHNAK2,AHR,AHSA1,AKAP17A,AKAP8L,AKAP9,AKR1C1,AKR1C3,AMPD3,ANKRD12,ANXA10,AP1AR,AP3S2,AP5Z1,APPBP2,AREG,AREGB,ARFGAP3,ARFGEF2,ARHGAP12,ARHGEF2,ARHGEF3,ARHGEF7,ARID3B,ARID4B,ARIH1,ARL8B,ARMCX3,ARMCX6,ARPP19,ASS1,ATF2,ATF3,ATF4,ATF7IP,ATG14,ATP2B1,ATP2B4,ATP6V0A2,ATP6V1B2,ATP6V1C1,A…
MSigDB Perturbation	KHETCHOUMIAN_TRIM24_TARGETS_UP	Retinoic acid-responsive genes up-regulated in hepatocellular carcinoma (HCC) samples of TRIM24 [GeneID=8805] knockout mice.	71	3.00923e-05	0.101231	0.00142578	2.24707	13.7958	31	421	0.013549	0.0736342	12	46	46	21,84,107,171,307,348,473,514,535,599,650,652,705,778,961,971,1106,1221,1241,1351,1621,1869,2011,2032,2065,2366,2386,2467,2590,2707,2730	21,84,107,171,307,348,473,514,535,599,650,652,705,778,961,971,1106,1221,1241,1313,1351,1416,1621,1869,2011,2032,2056,2065,2127,2366,2386,2467,2590,2707,2730,2904,3159,3208,3321,3681,3693,3736,3786,3789,3832,4050,4255,4357,4390,4462,4472,4525,4671,4906,4908,5042,5311,5419,5434,5467,5480,5605,5816,5889,5949,5953,5999,6041,6109,6525,6570,6586,6640,6752,7261,7392,7611,7693,7736,7899,7979,8065,8118,83…	CD38,CD44,CDKN1A,COL4A2,CP,FGFR2,HBEGF,IGF2,RAI14,SERPINE1,TGFBR2,TGM2	AFP,APP,BEX1,BTG2,CASP1,CD38,CD44,CDH1,CDKN1A,CDKN2B,COL1A1,COL1A2,COL4A1,COL4A2,CP,CYBB,EGR1,EMP1,FGFR2,FOS,HBEGF,HCK,ICAM1,IGF2,ITGAL,ITGAV,JUNB,KRT18,LAPTM5,LGALS1,LGALS3,PDGFA,RAI14,RBP1,SAMD4A,SERPINE1,SPARC,SPP1,STAT1,TGFB1,TGFBR2,TGM2,TP53,UCP2,VCAM1,VIM
MSigDB Perturbation	ZHENG_BOUND_BY_FOXP3	Genes whose promoters are bound by FOXP3 [GeneID=50943] based an a ChIP-chip analysis.	72	3.21208e-05	0.108054	0.00150075	1.27758	199.596	255	6091	0.111451	0.0418651	133	462	465	18,22,32,37,39,77,86,115,122,126,131,143,144,148,152,162,164,172,178,180,185,216,217,218,221,222,226,228,252,253,271,275,277,279,292,329,339,343,351,371,397,403,414,417,423,426,429,459,461,462,474,493,536,537,563,565,600,620,623,655,676,699,701,705,716,720,721,736,737,738,751,753,754,766,769,780,782,787,823,827,836,866,871,886,891,903,914,915,928,942,947,973,978,982,1006,1022,1032,1035,1039,1052,…	18,22,32,37,39,77,86,115,122,126,131,143,144,148,152,162,164,172,178,180,185,216,217,218,221,222,226,228,252,253,254,271,275,277,279,292,329,339,343,351,371,397,403,414,417,423,426,429,437,459,461,462,474,493,536,537,563,565,600,620,623,655,676,699,701,705,716,720,721,736,737,738,751,753,754,766,769,780,782,787,814,823,827,836,862,866,871,884,886,891,903,914,915,926,928,942,947,973,978,979,982,10…
,64228,64246,64247,64248,64249,64288,64289,64318,64319,64320,64333,64388,64395,64417,64459,64460,64464,64473,64474,64536,64537,64594,64595,64596,64597,64684,64727,64804,64805,64806,64807,64808,64980,64994,64995,64996,65035,65286,65287,65343,65359,65360,65361,65362,65363,65576,65578,65587,65598,65600,65629,65633,65640,65661,65681,65682,65685,65688,65692,65699,65701,65718,65778,65782,65789,65808,65…	ACTR3,ADAM19,ADD3,ADSS,AGO2,AGPAT5,AHR,AKAP13,ANKRD44,APBB1IP,ARHGEF10,ARHGEF3,ARID1A,ARL4A,ARL6,ASXL1,ATP1B3,ATP6V1G3,B3GNT2,BANP,BCL2,BCL6,C2CD5,CAMK4,CCDC64,CD44,CD53,CDC42SE2,CDK19,CHD2,CHD7,CITED2,CYTH1,DENND5A,DENND6A,DUSP6,ELK3,ENOX1,ENPP6,F2RL1,FAM69A,FAM76B,FEM1C,FERMT1,GBP6,GIMAP4,GIMAP6,GLCCI1,GNG2,GPR183,HIF1A,HIVEP2,HMG20A,ICA1,IDH1,IFNAR2,IL6ST,INPP4B,IRF2,IRF4,ITGA6,ITM2B,ITPR2,JAK…	ABLIM1,ABT1,ABTB2,ACTR3,ADAM19,ADAMTS6,ADD3,ADSS,AGGF1,AGO2,AGPAT5,AGPS,AHR,AIM2,AKAP13,AKR1D1,AMOT,AMPH,ANKH,ANKRD11,ANKRD28,ANKRD44,ANXA1,APBB1IP,AQR,ARHGAP15,ARHGAP25,ARHGAP5,ARHGEF10,ARHGEF3,ARID1A,ARID5B,ARL4A,ARL6,ASXL1,ASXL2,ATP1B3,ATP2B1,ATP6V1G3,ATP8A2,ATXN7,AXL,B3GNT2,BANP,BCL11B,BCL2,BCL6,BTBD10,BTLA,BZW2,C15orf48,C2CD5,C3orf38,C7orf72,CACNB4,CADM3,CADPS,CAMK4,CAST,CBLB,CC2D2A,CCDC64,C…
MSigDB Perturbation	KYNG_RESPONSE_TO_H2O2	Genes up-regulated in response to hydrogen peroxide [PubChem=784] in CS-B cells (Cockayne syndrome fibroblast, CS) expressing ERCC6 [GeneID=2074] off a plasmid vector.	73	3.24943e-05	0.109311	0.00149741	2.17505	15.1721	33	463	0.0144231	0.0712743	14	67	70	2.27834e+114	2,278,335,344,406,560,615,628,662,678,709,713,783,907,912,1029,1067,1102,1148,1299,1322,1403,1530,1570,1620,1706,1763,1779,1905,1993,2198,2448,2560,2636,2708,2763,2821,3096,3099,3192,3246,3253,3372,3454,3516,3519,3548,3568,3643,3936,3953,3954,3968,4295,4588,4708,4843,5142,5181,5326,5642,5670,5715,5724,5756,5926,5985,6168,6279,6326,6543,6724,7117,7120,7215,7320,7444,7607,7734,7955,7997,8091,8241,8…	ANKRD1,C4BPA,CCNH,COMMD6,CTNNB1,CTSB,DNAJA1,GADD45A,GDF15,PLXNA1,PTP4A3,RELA,SEPP1,SRGN	AEBP1,ANKRD1,ATP5E,ATP6AP1,ATP6V1C2,BAG4,C4BPA,CCNA2,CCNH,CD59,CD68,CD81,CDC34,CFD,CKMT2,COMMD6,COX6C,CRYAB,CST3,CTNNB1,CTSB,CTSS,CUX1,DDX52,DNAJA1,DNAJB1,DUT,EID1,ENG,FLOT2,GADD45A,GDF15,HMOX1,HNRNPA1,IFI6,IL10RB,MCAM,MPV17,OAZ2,OR2W3,ORAOV1,PKIA,PLXNA1,PPP1CA,PRKCSH,PSMC4,PTGER4,PTP4A3,RAB36,RCC1,RELA,RPL21,RPL31,RPL5,RPL7A,SEPP1,SERPINH1,SLC20A1,SLC39A7,SRGN,TAL1,TAP1,TCF3,TGFBR3,TSPAN4,UNG,ZB…
MSigDB Perturbation	STOSSI_RESPONSE_TO_ESTRADIOL	Genes up-regulated by estradiol (E2) [PubChem=5757] in U2OS cells (osteosarcoma) expressing ESR1 or ESR2 [GeneID=2099;2100].	74	3.32654e-05	0.111905	0.00151223	2.06798	17.8919	37	546	0.0161713	0.0677656	14	46	47	1.81152e+136	18,115,154,253,406,691,781,834,836,982,1120,1136,1164,1300,1311,1423,1493,1502,1560,1592,1638,1648,1668,1689,1728,1775,1876,1882,1927,2150,2225,2232,2256,2257,2309,2325,2429,2502,2522,2675,2726,2735,2760,3060,3081,3089,3192,3530,3548,3554,3618,4011,4181,4416,4470,4586,4737,4751,4872,5000,5229,5331,5403,5412,5443,5449,5570,5596,5622,6002,6136,6222,6414,6519,6595,6653,6701,6784,6862,6987,7097,7117,…	CD34,DEFB1,GJA1,GRK5,ITGA6,NRIP1,PDE4B,PLA2G4A,PPP1R12B,PTHLH,RHOBTB3,SEPP1,SKIL,TLE3	ACOX2,ADK,AGT,BIRC3,BMP6,CA12,CD34,CDH19,DEFB1,F13A1,GJA1,GREB1,GRK5,IL13RA2,IL24,IL8,ITGA6,KLRC3,KLRC4,KRT19,LRIG1,MNX1,MSMB,NR4A3,NRIP1,NTS,OPHN1,PDE4B,PDZK1,PLA2G4A,PPP1R12B,PTGS2,PTHLH,RALA,RASGRF1,RET,RHOBTB3,SEPP1,SERPINA6,SKIL,SLC9A3R1,SPARCL1,TCN1,TFF1,TLE3,WISP2
MSigDB Perturbation	MARSON_BOUND_BY_FOXP3_STIMULATED	Genes with promoters bound by FOXP3 [GeneID=50943] in hybridoma cells stimulated by PMA [PubChem=4792] and ionomycin [PubChem=3733].	75	3.35401e-05	0.112829	0.00150439	1.25375	232.103	291	7083	0.127185	0.0410843	196	952	988	10,12,15,18,20,37,41,43,48,53,64,67,73,113,128,134,140,141,144,145,159,161,164,174,187,189,208,210,222,226,228,235,253,258,275,277,279,290,299,326,332,342,343,350,353,361,376,378,388,389,392,397,402,419,426,434,435,459,463,481,489,509,527,536,537,543,556,591,593,602,608,613,615,620,630,635,640,641,647,661,673,679,680,692,697,701,702,704,738,755,757,766,773,785,793,801,803,810,812,829,846,849,851,…	10,12,15,18,20,37,41,43,48,53,64,67,73,113,128,134,140,141,144,145,159,161,164,174,187,189,208,210,222,226,228,235,253,258,275,277,279,290,299,326,332,342,343,350,353,361,376,378,388,389,392,397,402,419,426,434,435,459,463,481,489,509,527,536,537,543,556,591,593,602,608,613,615,620,630,635,640,641,647,661,673,679,680,692,697,701,702,704,738,755,757,766,773,785,793,801,803,810,812,829,846,849,851,…
2768,52773,52787,52794,52799,52800,52801,52803,52812,52814,52820,52846,52851,52880,52898,52899,52907,52917,52939,52954,52971,52980,52982,52987,52992,53017,53025,53026,53039,53050,53058,53068,53079,53083,53104,53134,53144,53157,53175,53176,53186,53225,53232,53233,53238,53276,53277,53279,53296,53303,53304,53309,53346,53358,53360,53367,53377,53381,53382,53393,53400,53402,53426,53439,53443,53453,5350…	ABHD2,ACP2,ACSL4,ACTRT3,ADM,ADORA2A,AGO2,AGPAT6,AHCYL1,AIPL1,ANGPTL4,ANTXR2,APBB1IP,APLP2,AQP9,ARHGAP12,ARHGEF6,ARID1A,ARL6IP6,ASF1A,ASUN,ATG12,ATPIF1,BACH1,BBS12,BLOC1S5,BSPRY,C1GALT1,C9orf123,CCR1,CCR3,CD53,CDC27,CDK19,CDYL2,CHD1,CITED2,CMTM7,CPD,CPSF2,CSF1,CTGF,CTSC,CTSD,CXCR5,CXCR6,DAP,DCLRE1C,DDB2,DDIT4,DNAJB12,DPYSL2,DUSP6,DZIP3,EEA1,EFTUD1,ELOVL5,ENSG00000173517,EPB41L2,EPC2,ERN1,EVI2A,EVI…	AASDHPPT,ABCB8,ABHD1,ABHD12,ABHD13,ABHD2,ABHD8,ACOT2,ACP2,ACSL4,ACTBL2,ACTRT3,ADAM10,ADD1,ADIPOQ,ADM,ADORA2A,AFTPH,AGGF1,AGO2,AGPAT6,AHCYL1,AIPL1,AKIRIN1,AKIRIN2,ALG8,ALG9,ALYREF,AMICA1,AMZ2,ANAPC11,ANGPTL4,ANKMY2,ANTXR2,ANXA7,AP4B1,APAF1,APBA2,APBB1IP,APH1A,APLP2,AQP11,AQP9,ARG2,ARHGAP10,ARHGAP11A,ARHGAP12,ARHGDIB,ARHGEF12,ARHGEF6,ARID1A,ARID5B,ARIH1,ARIH2,ARL10,ARL11,ARL5B,ARL6IP5,ARL6IP6,ARPC1…
MSigDB Perturbation	DACOSTA_ERCC3_ALLELE_XPCS_VS_TTD_UP	Genes up-regulated in fibroblasts expressing different mutant forms of ERCC3 [GeneID=2071]: XP/CS (xeroderma pigmentosum (XP) and Cockraine's syndrome (CS)) vs TTD (trichothiodystrophy).	76	3.83571e-05	0.129033	0.0016978	2.58045	8.91318	23	272	0.0100524	0.0845588	7	27	28	21,75,239,241,307,440,473,508,564,622,650,778,791,1106,1221,1237,1422,1555,1659,1845,2072,2373,2467	21,75,239,241,286,307,430,440,473,508,564,622,650,778,791,1106,1221,1237,1422,1555,1659,1845,2072,2373,2467,2875,2883,2976,2983,3161,3234,3268,3289,3376,3509,3808,3983,4472,4752,4849,5042,5215,5524,5605,6224,6347,6542,6708,6918,7311,7548,7747,8026,8067,8652,8788,9305,9311,9409,9471,9606,9785,10097,10545,10859,11019,11110,11248,11444,11821,11979,12112,12992,13357,13423,13463,13600,14016,14283,1431…	ANPEP,CXCL12,EFNB2,GNG4,MDK,RASSF2,TGM2	ADORA1,ANPEP,ANXA8L2,CTSH,CXCL12,E2F5,EFNB2,EPB41L3,FOS,GNG4,IGFBP2,IGFBP6,IGSF3,ISG20,KCNG1,KRT18,LHX2,MDK,MEST,NMB,NNMT,PCDH7,PTPRN,PTX3,RASSF2,RIMS2,TGM2
MSigDB Perturbation	BERTUCCI_MEDULLARY_VS_DUCTAL_BREAST_CANCER_UP	Genes up-regulated in medullary breast cancer (MBC) relative to ductal breast cancer (DBD).	77	4.32182e-05	0.145386	0.00188813	1.66635	40.2076	67	1227	0.0292832	0.0546047	31	185	187	15,24,25,31,52,91,113,128,145,156,174,210,237,243,332,367,419,441,464,514,556,586,590,594,613,652,748,804,867,901,902,916,933,971,1004,1045,1092,1159,1218,1236,1482,1570,1576,1593,1627,1729,1730,1744,1746,1756,1779,1815,1826,1830,1920,1942,2038,2115,2160,2216,2263,2366,2455,2506,2544,2559,2589	15,24,25,31,52,91,113,128,145,156,174,210,237,243,332,367,419,441,464,514,556,586,590,594,613,652,748,804,867,901,902,916,933,971,1004,1045,1062,1092,1159,1218,1235,1236,1482,1490,1570,1576,1585,1593,1627,1729,1730,1744,1746,1756,1779,1815,1817,1826,1830,1920,1942,2038,2115,2160,2216,2242,2263,2366,2455,2506,2544,2559,2589,2775,2779,2993,3027,3028,3098,3102,3188,3190,3211,3241,3340,3371,3405,3565…	ASUN,BUB3,C1orf174,C9orf72,CD38,DRAM1,FAM53B,GALM,GBP4,GBP5,HSH2D,IL15,IRF1,ITGB7,MINPP1,PARVB,PPIF,PSAP,PSMB2,PUS1,RCL1,RNF207,SCML1,SEC23IP,SKAP1,SLC2A6,SLC7A1,SRGN,TNFRSF1B,TRAF3,TRAFD1	ABCA3,ABCC4,ACSL5,ADAM8,ADRBK2,AIFM2,AIM2,ANXA7,APOE,ARNTL2,ASPHD2,ASUN,ATP8A1,ATXN7,BIRC3,BTN3A1,BTN3A3,BUB3,C11orf31,C1RL,C1S,C1orf174,C2CD2,C9orf72,CASP10,CASS4,CBS,CCDC88C,CD274,CD38,CDCA3,CDCP1,CEBPD,CENPA,CEP55,CHCHD1,CLEC2D,CLEC7A,CTSS,CUL2,CYBA,DAZAP1,DDX50,DESI1,DHX34,DNAJC9,DRAM1,DTX3L,E2F5,ECE2,ELL,EME2,EPB41,ERAP1,ERO1LB,ETV6,ETV7,FAM26F,FAM53B,FBL,FBXL14,FOXJ2,FOXM1,GABPB1,GALM,GBP4,…
MSigDB Perturbation	CONCANNON_APOPTOSIS_BY_EPOXOMICIN_UP	Genes up-regulated in SH-SY5Y cells (neuroblastoma) after treatment with epoxomicin [PubChem=3035402], a protease inhibitor causing apoptosis.	78	5.20474e-05	0.175088	0.00224471	1.50718	64.3584	97	1964	0.0423951	0.049389	51	226	231	15,40,61,81,89,113,122,128,145,154,174,181,191,210,227,267,332,347,360,419,458,465,476,485,549,552,556,592,615,625,635,656,662,666,691,701,705,726,803,834,912,967,976,1033,1039,1113,1154,1180,1230,1241,1311,1324,1351,1353,1495,1502,1530,1534,1576,1577,1593,1621,1682,1683,1707,1729,1743,1797,1886,1894,1915,1928,1957,1986,2032,2118,2163,2181,2266,2288,2295,2320,2346,2356,2426,2455,2482,2490,2498,25…	15,40,61,81,89,113,122,128,145,154,174,181,191,210,227,267,332,347,360,419,458,465,476,485,549,552,556,592,615,625,635,656,662,666,691,701,705,726,803,834,912,967,976,1033,1039,1094,1101,1113,1154,1180,1230,1241,1311,1324,1340,1351,1353,1380,1495,1502,1530,1534,1576,1577,1593,1621,1682,1683,1707,1729,1739,1743,1797,1837,1855,1886,1894,1915,1928,1957,1986,2032,2061,2106,2118,2154,2163,2181,2266,22…	ACADVL,AGTPBP1,ARHGEF2,ATF3,ATP2B4,BCL2L11,C18orf25,CASP7,CD44,CDKN1A,CEBPB,CEBPG,DHRS3,DNAJB6,DTNA,DUSP4,DYNC1H1,F2RL1,GADD45A,GADD45G,GDF15,GLRX3,GSR,GTF2A1,IL15,INPP5D,KIF1B,KITLG,KLF6,LMO2,MAFF,MAP1B,MDM2,PALLD,PCYT1B,PRSS12,SEL1L3,SERPINE1,SKIL,SLC12A4,SLC7A1,SMOX,SPATA2,STK17A,STX6,SYCP2,SYT2,TGFBR2,TNKS,UBR4,UPP1	ABCG1,ABHD3,ABLIM3,ACADVL,ACHE,ACTA2,ADRM1,AGTPBP1,AKAP6,AKR1C3,ALDH1A2,ANXA2,AQP3,ARHGEF2,ATF3,ATP2B4,BAK1,BBC3,BCL2L11,BLVRB,C18orf25,C1S,CALCA,CAMK2G,CAP2,CAPN7,CASP7,CCNT2,CCPG1,CD44,CDK11A,CDKN1A,CEBPB,CEBPG,CEP170B,CHM,CLTB,CLU,COL16A1,CREB5,CREM,CTH,CYB5R1,CYP4F2,DAP3,DDIT3,DGKE,DHRS3,DNAJB1,DNAJB2,DNAJB4,DNAJB6,DNAJC2,DOK1,DTNA,DUSP1,DUSP3,DUSP4,DYNC1H1,DYNC1I1,EIF5,ELL2,ENSG00000234857,E…
MSigDB Perturbation	THUM_SYSTOLIC_HEART_FAILURE_UP	Genes up-regulated in samples with systolic heart failure compared to normal hearts.	79	5.27975e-05	0.177611	0.00224824	1.35164	124.293	168	3793	0.0734266	0.0442921	85	389	403	4,21,32,41,57,63,76,86,94,96,101,104,110,111,129,142,143,209,216,218,227,236,252,273,278,290,298,302,307,312,321,340,354,410,411,424,426,473,499,504,507,509,527,543,544,550,560,598,650,662,677,700,709,718,734,752,778,782,787,791,829,866,914,917,942,985,995,997,1006,1025,1057,1106,1125,1130,1142,1213,1221,1242,1261,1263,1282,1300,1309,1326,1350,1351,1364,1390,1411,1458,1506,1507,1530,1546,1547,157…	4,21,32,41,57,63,76,86,94,96,101,104,110,111,129,142,143,209,216,218,227,236,252,273,278,290,298,302,307,312,321,340,354,379,410,411,424,426,473,499,504,507,509,527,543,544,550,560,598,650,662,677,700,709,718,734,752,778,782,787,791,829,853,866,914,917,942,974,985,995,997,1006,1025,1057,1106,1125,1130,1142,1189,1204,1213,1221,1242,1261,1263,1282,1300,1309,1326,1350,1351,1364,1390,1411,1458,1506,1…	ACTR2,ADM,AGO4,ANGPT2,ARL8B,ARNTL,ASCC1,ATP1B4,B3GNT2,BCAT1,CALCRL,CAPRIN1,CD53,CDC42EP3,CDKL1,CECR1,CLIC5,CP,CTSB,CTSC,CXCL12,EDN1,EFNA5,EIF1,ENO1,EPHA4,ETV1,EVI2B,FGF1,GABRA4,GADD45A,GPR34,HP1BP3,INPP5A,IRF8,LYN,LYRM7,MAN1A1,MAP3K7CL,MAX,MFGE8,MPEG1,MR1,MS4A4A,NAB1,NAMPT,NFATC2,NFIA,NOTCH2,NTRK3,PDK1,PHLDA1,PICALM,PKP2,PLA2G4A,PPP1R3B,PRDM1,RBMS3,RNF14,SCOC,SEPT10,SERPINE2,SKAP2,SLC8A1,SNAP23,S…	ABCD3,ACE2,ACTB,ACTG1,ACTR2,ADAM17,ADAM9,ADM,AGO4,AIF1,AKAP1,AKR1C2,ALDH4A1,ALOX5AP,ANAPC5,ANGPT2,ANGPTL1,ANKRD12,ANP32A,ANXA4,APBB2,APOL4,ARF1,ARF6,ARFIP1,ARHGAP24,ARHGDIB,ARHGEF9,ARL8B,ARNTL,ASCC1,ASPN,ATP1B4,ATP6AP2,B3GNT2,BCAT1,BCLAF1,BRCC3,BSG,BTN3A2,C10orf10,C1QA,C1QB,C1S,C3AR1,C6orf62,CALCRL,CALU,CAPRIN1,CASP1,CAT,CCL4,CCL8,CCNG2,CCNL2,CCT2,CD14,CD46,CD52,CD53,CD74,CDC42EP3,CDC5L,CDH19,CDK…
MSigDB Perturbation	MCBRYAN_PUBERTAL_BREAST_4_5WK_DN	Genes down-regulated during pubertal mammary gland development between week 4 and 5.	80	5.3302e-05	0.179308	0.00224135	1.58294	49.9072	79	1523	0.034528	0.0518713	44	183	188	67,73,83,94,109,151,268,300,407,428,454,471,529,572,629,641,699,720,812,846,872,880,922,988,1007,1025,1030,1135,1147,1194,1290,1323,1331,1350,1361,1390,1405,1410,1521,1539,1552,1567,1575,1721,1727,1733,1773,1792,1811,1838,1860,1865,1880,1919,1930,1956,1957,1997,2003,2011,2033,2130,2169,2194,2245,2256,2290,2323,2340,2351,2386,2403,2404,2411,2418,2555,2603,2707,2738	67,73,83,94,109,151,268,300,407,428,454,471,529,572,629,641,699,720,740,812,845,846,872,880,922,934,960,988,992,1007,1025,1026,1030,1063,1135,1147,1194,1250,1290,1323,1331,1350,1361,1390,1405,1410,1521,1539,1543,1552,1567,1575,1678,1721,1727,1733,1773,1792,1811,1838,1860,1865,1880,1919,1930,1956,1957,1997,2003,2011,2033,2130,2169,2194,2245,2256,2290,2293,2323,2340,2351,2386,2403,2404,2411,2418,25…	AATK,ACAA2,ACAD9,ACADVL,ACAT1,ACSL1,ACVR1C,ADCK3,AHCYL1,APLP2,ATP5SL,C19orf12,CA13,CISD1,CP,CYTH1,DDX6,EDNRA,EHD2,EPAS1,EPB41L2,ETFDH,GM2A,GOLPH3,HIPK2,KCNK2,MLXIPL,NNAT,PDK1,PFKFB3,PPP1R8,PRKCE,RASSF3,RPS6KA3,SH2B3,SLC25A35,ST6GALNAC5,TBL1XR1,TMEM109,TNS1,TSPAN17,UBE3A,VEGFA,WBSCR16	AATK,ACAA2,ACACA,ACAD9,ACADVL,ACAT1,ACLY,ACO2,ACSF2,ACSL1,ACVR1C,ADCK3,ADRB3,AHCYL1,AKT1,AKT2,ANXA8L2,APLP2,APOC2,ART3,ATP5D,ATP5SL,ATP6V0A1,ATPAF2,BCAT2,BCHE,BLCAP,BMP1,BPNT1,C19orf12,C20orf27,C7orf55,CA13,CARHSP1,CCNK,CD8A,CDH5,CHRDL1,CIDEA,CISD1,COQ5,COX7A1,CP,CSNK2A1,CSPG4,CUX1,CYR61,CYTH1,DBT,DDX6,DLAT,DMPK,DNM2,ECH1,ECI1,EDNRA,EHD1,EHD2,EHHADH,EIF4G1,EPAS1,EPB41L2,ERAL1,ETFDH,ETS1,EXTL3,FAB…
MSigDB Perturbation	GAZDA_DIAMOND_BLACKFAN_ANEMIA_ERYTHROID_DN	Genes down-regulated in erythroid progenitor cells isolated from bone marrow of patients with Diamond-Blackfan anemia (DBA) and mutated RPS19 [GeneID=6223].	81	5.42059e-05	0.182349	0.00225122	1.37635	109.711	151	3348	0.0659965	0.0451015	78	462	481	3,4,5,9,26,47,53,64,72,77,82,89,96,100,111,118,125,135,143,157,170,181,211,214,228,233,235,255,260,267,278,315,354,360,371,376,377,397,425,441,462,483,510,512,515,527,534,535,560,663,666,680,682,696,705,709,721,734,767,804,811,820,848,873,916,969,970,984,987,1019,1020,1069,1123,1125,1213,1226,1230,1261,1270,1271,1280,1282,1326,1333,1352,1364,1382,1482,1507,1534,1537,1567,1573,1579,1621,1640,1688,…	3,4,5,9,26,47,53,64,72,77,82,89,96,100,111,118,125,135,143,157,170,181,211,214,228,233,235,255,260,267,278,315,354,360,371,376,377,397,425,441,462,483,510,512,515,527,534,535,560,606,611,663,666,680,682,696,705,709,721,734,767,804,811,820,830,848,862,873,916,964,969,970,983,984,987,1019,1020,1062,1069,1123,1125,1149,1199,1213,1226,1230,1261,1270,1271,1280,1282,1326,1332,1333,1352,1364,1382,1482,1…	ACP5,ACTR2,ADM,AHR,ANK1,ARFRP1,ARHGEF10,ARL4D,ASF1A,ATG5,BRCA2,BTG1,CAPN3,CAPZB,CD44,CDC27,CEBPG,CIAO1,COL8A2,CTSB,DCLRE1C,DPH5,EFNA5,EIF1,ELOVL5,ENDOD1,ERN1,FBXL4,GADD45G,GLP1R,GPR12,GRK4,H3F3A,HK1,HNRNPM,ICA1,IKBKE,ITGA4,KLHL5,MAOA,MAP7,MAX,MR1,MRPL23,MTHFS,MTMR12,MYB,NCOR2,NOTCH2,OSGIN2,PGM3,PHKA2,PICALM,PLEKHM1,PRRC2C,PSAP,PSIP1,RAB2A,RAPGEF2,RBMS1,RMND1,SEL1L3,SKAP2,SLC24A3,SMAD3,SNRPE,SRR,S…	A1CF,ABCA5,ACACB,ACP5,ACSM3,ACTR2,ACYP2,ADAM22,ADAMTS12,ADM,AHCTF1,AHDC1,AHR,AIF1,AIMP2,ALOX12,ALOX5AP,ANK1,ANXA3,AOAH,AP4S1,AP5S1,APOLD1,APOM,ARFRP1,ARG2,ARHGEF10,ARIH2,ARL4D,ARNT,ASF1A,ASMTL,ATG5,ATP8B1,ATPAF2,AURKB,AZI2,BAX,BCAT2,BICD1,BLOC1S1,BMP7,BNIP3,BPHL,BRCA2,BRD2,BTD,BTG1,C10orf88,C19orf24,C19orf60,C1orf54,C6orf62,C9orf16,CALR,CAMKK2,CANX,CAPN3,CAPZB,CASP4,CCDC101,CCDC28B,CCRN4L,CD44,CD…
MSigDB Perturbation	BOYLAN_MULTIPLE_MYELOMA_C_DN	Genes down-regulated in group C of tumors arising from overexpression of BCL2L1 and MYC [GeneID=598;4609] in plasma cells.	82	6.64734e-05	0.223617	0.00272703	1.83178	25.6582	47	783	0.020542	0.0600255	16	54	56	3,6,17,18,42,52,84,126,253,265,301,447,554,578,595,596,655,660,715,744,796,951,952,961,987,1134,1136,1164,1170,1180,1262,1305,1387,1419,1520,1592,1869,1927,1936,1994,2065,2266,2325,2429,2476,2688,2735	3,6,17,18,42,52,84,126,253,265,301,447,554,578,595,596,655,660,715,744,796,951,952,961,979,987,1087,1134,1136,1164,1170,1180,1262,1305,1387,1419,1520,1592,1834,1869,1895,1902,1927,1936,1994,2065,2266,2325,2332,2429,2476,2688,2735,2888,3015,3083,3104,3152,3169,3227,3387,3450,3539,3608,3659,3712,3771,3804,3883,3905,3906,3937,4105,4120,4357,4492,4744,4818,4835,4875,5026,5153,5331,5347,5363,5407,5489…	AIG1,CERS6,CYSTM1,DOCK5,KLF6,LAPTM4B,LINGO2,MYOF,NRIP1,RAB20,RAB30,SFMBT2,SOAT1,TNFRSF21,VOPP1,ZBTB10	ABCB1,AIG1,AK7,APOE,ATXN1,B4GALT6,BCL11B,BICD1,C3orf33,CERS6,CKB,CTSL,CYSTM1,DOCK5,EGLN3,EID2,ENAH,FZD6,G6PC3,IFT43,IRS2,ITFG3,JUN,KCNN4,KIF13A,KLF6,KLF7,LAPTM4B,LINGO2,MAGEH1,MAP9,MYOF,NFIC,NRIP1,PDE4D,PLOD2,RAB20,RAB30,RGS1,RNF125,RNF43,SAT1,SERPINB1,SFMBT2,SLC30A1,SOAT1,SPP1,TANC1,TNFRSF21,TSC22D1,VOPP1,ZBTB10,ZC2HC1A,ZSWIM6
MSigDB Perturbation	RICKMAN_TUMOR_DIFFERENTIATED_WELL_VS_MODERATELY_DN	Down-regulated genes that vary between HNSCC (head and neck squamous cell carcinoma) groups formed on the basis of their level of pathological differentiation: well vs moderately differentiated tumors.	83	7.18093e-05	0.241567	0.00291044	1.81287	26.4774	48	808	0.020979	0.0594059	25	98	115	79,86,108,204,216,219,255,274,280,288,294,351,627,780,782,787,809,832,956,967,980,1070,1079,1176,1207,1289,1328,1640,1646,1687,1746,1853,1946,1990,2032,2060,2086,2253,2259,2270,2278,2458,2513,2516,2554,2570,2676,2681	79,86,108,204,216,219,255,274,280,288,294,351,627,780,782,787,809,832,853,956,967,980,1063,1070,1079,1176,1207,1289,1328,1380,1585,1640,1646,1687,1746,1753,1810,1817,1853,1946,1990,2032,2060,2086,2242,2253,2259,2270,2278,2330,2458,2513,2516,2554,2570,2638,2676,2681,2792,2822,2870,2939,2996,3022,3079,3105,3210,3287,3294,3366,3492,3512,3627,3647,3747,3764,3822,3831,3873,3927,3950,4082,4155,4211,427…	AGPAT4,AJAP1,ANGPT2,ARRDC4,CAV1,CDH22,CDKN1A,CYFIP1,CYP26B1,GPR39,H3F3A,HIF1A,IFFO2,IL1A,IMPA2,KCTD5,KRT17,KRTDAP,MAPK6,NUMB,PLEK2,PTGS1,RRAS2,SFN,SLC28A3	AFAP1L1,AGPAT4,AJAP1,AJUBA,ANGPT2,APBB2,APLN,AREG,AREGB,ARPC5L,ARRDC4,ASCC3,ASPRV1,BNC1,CARD10,CARHSP1,CAV1,CCDC85C,CCRN4L,CDC42EP2,CDCP1,CDH22,CDKN1A,CDSN,CNGB1,CPA4,CYFIP1,CYP26B1,DEPDC7,DNAJB5,DSG1,DUSP14,EHD4,ENSG00000256500,ETS2,GDPD2,GJB2,GOLGA7B,GPR39,GPR68,H3F3A,H3F3B,HIF1A,HIST1H2BC,HIST1H2BG,HIST1H2BI,HOMER3,IFFO2,IL1A,IL22RA1,IL24,IMPA2,IPPK,KCTD5,KLC1,KLK10,KRT16,KRT17,KRTDAP,LIMA1,LU…
MSigDB Perturbation	LABBE_TGFB1_TARGETS_DN	Down-regulated genes in NMuMG cells (mammary epithelium) after stimulation with TGFB1 [GeneID=7040].	83	7.18093e-05	0.241567	0.00291044	1.81287	26.4774	48	808	0.020979	0.0594059	24	99	105	15,69,113,118,128,145,174,210,219,235,273,312,332,419,426,510,550,604,615,701,746,764,912,975,985,989,1217,1276,1377,1382,1392,1411,1492,1545,1576,1579,1599,1686,1731,1860,2011,2139,2229,2344,2386,2610,2684,2707	15,69,113,118,128,145,174,210,219,235,273,312,332,419,426,510,550,604,615,701,746,764,912,975,985,989,1217,1276,1377,1382,1392,1411,1492,1545,1576,1579,1599,1686,1731,1860,2011,2139,2229,2327,2344,2386,2610,2684,2707,2713,2812,2897,3087,3091,3168,3228,3350,3393,3394,3449,3619,3710,3757,3778,3850,3852,4077,4150,4327,4333,4470,4543,4649,4664,4732,4755,4764,4772,4825,4921,5145,5193,5345,5365,5480,55…	ACSL4,ALCAM,CA1,CAPN3,CAV1,CCL20,CP,DCN,DHRS3,ELF3,EZH1,FGF4,FIGN,GC,GCLC,GDF15,ITIH2,KITLG,LRRC23,NTRK3,PBX1,PSTPIP2,SEMA6B,SOCS2	ACSL4,ADCYAP1,AFP,AKAP7,ALCAM,ANKH,ANXA4,AP1M2,APOC2,BUB1,CA1,CAPN3,CASP3,CAT,CAV1,CAV2,CCL13,CCL20,CCNT1,CHKA,CNGA2,CNN1,CP,CRTAM,CXCL1,CXCL6,CYP3A7,DBC1,DCN,DHRS3,ECT2,ELF3,ENTPD2,EPS15L1,EREG,EZH1,FAM69B,FGF19,FGF4,FGFR3,FIGN,GABRB2,GC,GCLC,GDF15,GNAI1,GSTM1,GTF2H4,GUCY2D,HPGDS,ID1,ID2,ITIH2,ITLN1,ITM2A,KCNJ2,KITLG,KLRC2,KRT19,KRT35,LCN2,LGALS4,LRRC23,MASP1,MDM1,MIF,MMP13,MT2A,MUC1,MYD88,NELL2…
MSigDB Perturbation	TARTE_PLASMA_CELL_VS_B_LYMPHOCYTE_UP	Genes up-regulated in plasma cells compared with B lymphocytes.	85	7.69293e-05	0.25879	0.00304459	1.86232	23.6265	44	721	0.0192308	0.0610264	19	75	76	3.21152e+155	32,115,150,218,219,461,514,539,616,620,623,652,710,836,906,914,942,971,978,982,1032,1168,1376,1450,1458,1465,1507,1570,1593,1670,1720,1729,1779,1781,1954,2047,2056,2175,2235,2256,2309,2318,2331,2366,2377,2455,2502,2521,2541,2649,2726,2753,2868,2884,2904,2941,3002,3016,3027,3060,3089,3400,3530,3532,3725,3736,3789,3843,4104,4115,4123,4171,4315,4404,4416,4469,4737,4761,4846,4894,5003,5031,5072,5157,…	ARF4,CAV1,CCR2,CD38,CITED2,DUSP7,FUT8,IRF4,ITGA6,MAN1A1,NUCB2,PDK1,PRKCI,SEL1L,SLC35B1,SLC7A1,SRGN,TM9SF2,TRIB1	AARS,AGA,ALG3,AQP3,ARF4,ARID3A,CANX,CASP10,CAV1,CCR2,CD27,CD38,CITED2,CKAP4,CXCR3,DDOST,DUSP7,ELL2,EMC2,FGL2,FKBP2,FUT8,GAS6,GGCX,HAGH,HDLBP,HEXB,HSD17B8,HSP90B1,HSPA5,HYOU1,ICAM2,IL15RA,IL6R,IRF4,ITGA6,KDELR1,KDELR2,LGALS3,LMAN2,MAN1A1,MANF,NEU1,NUCB2,P4HB,PDIA5,PDIA6,PDK1,PDXK,PLD3,PLOD1,PPIB,PRDX4,PRKCI,PYCR1,PYGB,RNASE4,RPN1,RPN2,SEC61B,SEL1L,SELPLG,SERPINI1,SLC35B1,SLC7A1,SPN,SRGN,SSR1,STT3A…
MSigDB Perturbation	MASRI_RESISTANCE_TO_TAMOXIFEN_AND_AROMATASE_INHIBITORS_UP	Genes up-regulated in derivatives of MCF-7aro cells (breast cancer) that developed resistance to tamoxifen [PubChem=5376] or inhibitors of aromatase (CYP19A1) [GeneID=1588].	86	7.70887e-05	0.259326	0.00301542	3.20104	4.68597	15	143	0.00655594	0.104895	4	19	20	7.91082e+50	79,108,204,274,294,781,832,956,1079,1108,1648,1728,1853,2250,2675,3647,4407,4943,5192,5481,5900,6519,6529,7783,8896,9442,11157,11697,12712,14571,16209,16583,16641,17338,18567,20304,20568,21723,21724,23412,24722,26087,27025,27156,27204,28261,28658,28846,29644,30642,30643,31274,31482,32000,32360,32363,33345,34111,37179,38349,38535,38613,39680,39856,40718,41492,42731,42775,43487,44123,44232,45259,45…	CYP26B1,GJA1,METTL7A,SULF1	ABCA12,AGR2,AREG,AREGB,ATRNL1,CYP26B1,DMD,ELOVL2,FHL1,GJA1,GREB1,METTL7A,MGP,MYBL1,NPY1R,PDZK1,PGR,SULF1,TFF1
MSigDB Perturbation	WHITESIDE_CISPLATIN_RESISTANCE_UP	Genes up-regulated in NCI-H2170 cells (lung cancer) upon induction of resistance to cisplatin [PubChem=2767].	87	8.08692e-05	0.272044	0.00312694	4.90445	1.83507	9	56	0.00393357	0.160714	4	10	11	8.04466e+30	80,446,615,912,1206,1883,2032,2061,2512,2534,3059,3488,6168,6525,6570,6752,8998,9222,9549,11793,11843,13548,14912,15590,15592,16203,20247,27096,28272,28900,29259,31689,32846,33909,34933,36223,36393,37994,38822,38852,39120,39493,42828,44142,45130,46645,46939,47949,52088,53563,54915,54972,55446,56701,65994,66741	CDKN1A,GDF15,PTGES,PXN	CDKN1A,ERBB3,FASN,GDF15,ITGA7,ITGB4,MX1,PTGES,PXN,RAC1
MSigDB Perturbation	GRAESSMANN_APOPTOSIS_BY_SERUM_DEPRIVATION_UP	Genes up-regulated in ME-A cells (breast cancer) undergoing apoptosis upon serum starvation (5% to 0% FCS) for 22 hr.	88	8.64357e-05	0.29077	0.0033042	1.31783	140.383	185	4284	0.0808566	0.0431839	105	521	539	31,45,48,50,68,72,75,81,83,136,143,153,163,181,205,226,239,241,276,279,305,328,336,339,344,347,353,394,401,406,416,420,423,429,431,440,457,462,481,508,515,533,538,540,549,562,564,586,607,612,613,622,625,630,641,658,662,680,693,701,733,785,793,801,806,812,869,899,909,910,923,935,976,984,1008,1019,1033,1061,1152,1159,1164,1166,1171,1177,1223,1229,1232,1234,1261,1269,1271,1301,1323,1344,1349,1367,13…	31,45,48,50,68,72,75,81,83,136,143,153,163,181,205,226,239,241,276,279,286,305,328,336,339,344,347,353,379,394,401,406,416,420,421,423,429,430,431,440,457,462,481,508,515,533,538,540,549,562,564,586,607,611,612,613,622,625,630,641,658,662,680,693,701,733,785,793,801,806,812,826,869,899,909,910,923,935,976,984,1008,1019,1033,1061,1063,1071,1098,1107,1115,1117,1152,1159,1164,1166,1171,1173,1177,120…	AATF,ADAR,AHR,ALAS1,APEX2,ARAP2,ARFRP1,ARL14EP,ASIP,ATG10,BCL6,BEAN1,CACNA1A,CASP7,CASQ2,CCL5,CCNH,CEBPB,CEBPG,CHAC1,CMTM6,CNTNAP4,CP,CRHR1,CSF1,CTGF,CXCR5,DAPK2,DCC,DUSP6,EFNB2,EHD2,ERN1,FGFBP1,FNDC3A,GADD45A,GALC,GRHL2,HIPK2,IFI35,IFNAR2,INTS7,IRF1,IRF2,KCNMB2,KIAA1524,KPNB1,LMNB1,LMO4,LRG1,LRRC3B,MAX,MCCC2,METTL7A,MFSD1,MOCS1,MYC,NEDD9,NMNAT1,OSGIN2,OXA1L,PARP12,PDE7A,PIAS1,PPAP2B,PPIF,PRDM1,P…	AATF,ABCC5,ABCC8,ABI3BP,ACOT6,ACTB,ACTL7B,ADAMTS10,ADAR,ADCY3,ADCY7,ADI1,AEN,AHR,AICDA,ALAS1,ALG13,ALPL,ANGPT1,AP2B1,APEX2,APMAP,APOBEC1,AQP1,ARAP2,ARFRP1,ARHGAP39,ARL14EP,ASIP,ATF4,ATG10,ATL3,AVPR1A,BCAN,BCL2L2,BCL6,BCL9,BCR,BEAN1,BECN1,BGN,BOC,BPNT1,BST2,C16orf91,C1R,C3,C8orf4,C8orf82,C9orf91,CACNA1A,CAPN6,CASD1,CASP7,CASQ2,CCL2,CCL5,CCL7,CCNC,CCNH,CCSER2,CCT4,CD2,CD59,CDCA3,CDHR4,CDK5,CDK5R1,C…
MSigDB Perturbation	ABBUD_LIF_SIGNALING_1_UP	Genes up-regulated in AtT20 cells (pituitary cancer) after treatment with LIF [GeneID=3976].	89	8.76619e-05	0.294895	0.00331343	2.12111	14.615	31	446	0.013549	0.0695067	17	44	46	31,32,194,195,218,347,471,586,604,625,675,764,765,813,866,914,942,1013,1152,1458,1862,2181,2216,2245,2255,2263,2541,2561,2603,2637,2762	31,32,194,195,218,347,471,586,604,625,675,764,765,813,866,914,942,1013,1152,1458,1862,2181,2216,2245,2255,2263,2355,2495,2541,2561,2603,2637,2762,2934,2987,3016,3162,3206,3225,3228,3434,3520,3550,3728,3870,4008,4020,4106,4514,4570,4605,4696,4825,4894,5003,5038,5435,5896,5935,6227,6374,6468,6918,7012,7026,7058,7166,7398,7616,8089,8117,8252,8305,8448,8540,8725,8788,8893,8938,8949,8990,9038,9556,964…	ACAA2,CEBPB,CYB561,ELF3,FBP1,FGG,GRAMD3,HAS1,IRF1,LRG1,MAN1A1,PLD1,POMC,PTPN1,RHOU,ST3GAL1,UPP1	ACAA2,AHSG,ALDOC,ANXA8L2,BCL3,CEBPB,CXCL14,CYB561,ELF3,FBP1,FGG,GPCPD1,GPX3,GRAMD3,HAS1,IL1R1,IRF1,KLF10,KNG1,LBP,LCN2,LRG1,MAN1A1,MPO,NMI,PLD1,POMC,PTPN1,RASA3,RGS4,RHOU,RNASE3,SCT,SOCS3,SQRDL,ST3GAL1,STAT3,TAPBP,TMEM176A,TNFRSF1A,TSPAN4,UPP1,VWF,XBP1
MSigDB Perturbation	SWEET_KRAS_ONCOGENIC_SIGNATURE	Genes that contributed maximally to the GSEA score of the up-regulated gene set from the KrasLA mouse model in two human lung cancer expression data sets comparing mutant vs normal KRAS [GeneID=3845].	90	9.92708e-05	0.333947	0.00371052	1.85603	23.1677	43	707	0.0187937	0.0608204	21	87	89	32,96,218,300,351,356,390,510,544,597,620,662,701,718,780,808,914,922,942,986,988,1031,1070,1086,1253,1382,1393,1458,1530,1558,1700,1802,1919,2021,2032,2165,2184,2259,2278,2482,2541,2599,2684	32,96,218,300,351,356,390,510,544,597,620,662,701,718,780,808,914,922,942,986,988,1031,1070,1086,1253,1382,1393,1458,1530,1558,1623,1700,1802,1919,2021,2029,2032,2056,2165,2184,2259,2278,2482,2541,2567,2599,2684,2713,2799,2904,2933,2951,3016,3027,3168,3210,3212,3437,3496,3619,3627,3697,3789,4051,4077,4190,4191,4338,4368,4495,4536,4732,4787,4814,4816,4825,4832,4894,4974,5003,5099,5181,5424,5477,55…	BTG1,CDKN1A,CEACAM1,CITED2,DUSP6,GADD45A,GNS,HIF1A,IL18,ITGAM,MAN1A1,MDFI,MYCN,NPC2,PABPC1,PDK3,PHLDA1,PSEN1,SFTPB,SLC12A2,TANK	ACLY,ATP1B1,ATP5F1,AXIN1,BOP1,BSG,BTG1,CCND1,CD68,CDKN1A,CEACAM1,CITED2,CSF2,CST3,CTSS,DUSP6,EEF1B2,EEF1D,EEF2,EIF3E,FAM3C,FCGR2A,FEZ2,FKBP2,GABPB2,GADD45A,GLRX,GNB2L1,GNS,HIF1A,HLA-DQA1,HNF1B,HNRNPA1,HPN,ID2,IL18,ITGAM,ITGB2,KDELR1,KRT18,KRT8,LAMC1,LCN2,LGALS3,MAN1A1,MANF,MAPK1,MDFI,MRC1,MT2A,MTIF2,MYCN,MYH7,NMT1,NPC2,NPR2,NUP88,PABPC1,PAFAH1B3,PCBD1,PDK3,PHB2,PHLDA1,PHLDA2,PLIN2,PON2,PSEN1,RABG…
MSigDB Perturbation	BERENJENO_TRANSFORMED_BY_RHOA_DN	Genes down-regulated in NIH3T3 cells (fibroblasts) transformed by expression of contitutively active (Q63L) form of RHOA [GeneID=387] off plasmid vector.	91	0.000102905	0.346171	0.00380408	1.35911	110.366	150	3368	0.0655594	0.0445368	90	385	390	10,16,19,66,67,104,131,153,185,187,207,212,217,219,255,256,261,282,290,300,321,333,348,390,414,420,459,509,510,518,526,530,538,543,547,565,569,584,602,640,642,643,673,686,702,736,742,752,756,786,791,804,835,838,871,903,904,910,916,921,922,936,948,988,1025,1039,1059,1064,1116,1129,1158,1177,1206,1244,1253,1263,1270,1272,1278,1286,1305,1314,1316,1374,1382,1390,1397,1401,1482,1486,1548,1574,1583,162…	10,16,19,66,67,104,131,153,185,187,207,212,217,219,255,256,261,282,286,290,300,321,333,348,390,414,420,430,459,509,510,518,526,530,538,543,547,565,569,584,602,640,642,643,673,686,702,736,742,752,756,786,791,804,835,838,862,871,903,904,910,916,921,922,936,948,988,1025,1039,1059,1060,1064,1116,1129,1158,1177,1206,1244,1253,1263,1270,1272,1278,1286,1305,1314,1316,1374,1382,1390,1397,1401,1416,1482,1…	ACADM,AKAP12,ANK3,APLP2,ARFGAP3,ASCC1,ATG12,BHLHE40,C14orf166,CACNA1A,CALML4,CAV1,CDK14,COL5A1,CSRP1,CSTF2T,CXCL12,CYB5A,DAP,DCN,DECR1,DLK1,DTD1,EBF1,EIF2AK3,ELAVL2,EN1,F2R,FAM213A,FGFR2,FOXF1,FZD1,GALK2,GNPDA1,GNS,H3F3A,HMGCS1,IDH1,IL6ST,ITM2B,ITPR2,LAMP2,LPAR1,LRBA,LUM,MAB21L2,MAOA,MARCKS,MATN2,MRC2,MYL12B,MYO10,NDFIP1,NPC2,NPR3,NUCB2,PIK3R1,PMP22,POSTN,PPAP2B,PPP3CA,PRRX2,PSAP,RAB24,RAB9A,RECK…	ABLIM1,ACADM,ACTB,ADAM23,AEBP1,AES,AGTR2,AIM1,AKAP12,ALDH1A1,AMOT,ANK3,ANXA4,ANXA6,AOC3,AP3S1,APLP2,APOA1BP,ARF5,ARFGAP3,ARHGEF25,ARSA,ASCC1,ATF5,ATG12,ATN1,ATP6V0A1,ATP6V1A,ATRAID,BHLHE40,BPHL,BRI3,C14orf166,C1R,C1orf85,C7orf73,CACNA1A,CACNA1G,CALML4,CAPN6,CASK,CASP9,CAV1,CCDC53,CCDC80,CCNG2,CD276,CD47,CD99,CDK14,CDO1,CELF2,CHMP2A,CLK1,CLN6,CLTA,CNN3,CNPY2,COL1A1,COL1A2,COL3A1,COL4A5,COL5A1,COL6…
MSigDB Perturbation	WHITFIELD_CELL_CYCLE_M_G1	Genes periodically expressed in synchronized HeLa cells (cervical carcinoma), with peak during the M/G1 phase of cell cycle.	92	0.000103597	0.3485	0.00378804	1.64461	38.307	63	1169	0.027535	0.0538922	36	137	138	37,55,102,152,222,258,271,293,299,351,450,463,608,615,635,639,766,780,785,801,810,831,851,875,912,1022,1034,1047,1070,1077,1113,1143,1171,1258,1365,1472,1495,1514,1523,1631,1668,1700,1743,1749,1757,1950,1994,2019,2186,2227,2257,2259,2278,2388,2408,2421,2477,2490,2493,2509,2588,2668,2702	37,55,102,152,222,258,271,293,299,351,450,463,608,615,635,639,710,766,780,785,801,810,831,851,875,912,949,1022,1034,1047,1070,1077,1113,1143,1171,1258,1365,1472,1495,1514,1523,1631,1668,1670,1700,1743,1749,1757,1891,1950,1994,2019,2024,2127,2186,2227,2257,2259,2278,2304,2331,2364,2374,2388,2408,2421,2439,2477,2490,2493,2509,2519,2588,2668,2702,2900,2902,2921,2945,2962,3002,3050,3119,3210,3233,325…	AFAP1,AKAP13,ANP32E,BAG3,C4A,CEP70,CYTH3,DNAJB6,FOXK2,GDF15,GSE1,GTF3C4,HIF1A,KDM5B,KIF5B,KPNB1,KRAS,LRIF1,NCOA3,NFIA,NOS1,NUDT4,PCF11,PPP2R2A,PSEN1,RHEB,SLC39A10,SRSF3,SYNCRIP,TLE3,TOP1,TULP4,USP6NL,VANGL1,WIPF2,YY1	AFAP1,AGFG1,AGPAT3,AKAP13,AMD1,ANP32E,ANTXR1,AOC3,BAG3,C4A,CBX3,CCSAP,CDC42,CDK7,CDKN3,CEP70,CNIH4,CRYBA1,CTR9,CWC15,CYTH3,DCP1A,DCTN6,DKC1,DNAJB6,DSP,DYNLL1,EIF4E,ELP3,FAM189B,FAM60A,FOPNL,FOXK2,FRS2,FXR1,G3BP1,GATA2,GDF15,GNB1,GRPEL1,GSE1,GSPT1,GTF3C4,HIF1A,HIST2H2BE,HLA-DOA,HMG20B,HMGCR,HSD17B11,HSPA8,IFIT1,IFIT2,ILF2,JMJD1C,KDM5B,KIAA0586,KIF5B,KPNB1,KRAS,LARP1,LARP7,LRIF1,LYAR,MLLT6,MORF4L2,…
MSigDB Perturbation	HUTTMANN_B_CLL_POOR_SURVIVAL_UP	Up-regulated genes in B-CLL (B-cell chronic leukemia) patients expressing high levels of ZAP70 and CD38 [GeneID=7535;952], which are associated with poor survival.	93	0.000104574	0.351788	0.00378266	1.45651	71.4037	104	2179	0.0454546	0.0477283	52	256	264	15,63,86,104,110,113,128,142,145,150,153,174,210,216,231,236,302,321,323,332,419,420,425,466,499,504,505,514,527,597,598,624,643,652,677,701,728,768,782,787,789,808,847,901,906,971,980,1040,1120,1123,1139,1205,1407,1432,1443,1494,1505,1516,1546,1576,1614,1629,1666,1671,1717,1761,1777,1852,1883,1910,1990,1997,1999,2032,2067,2086,2088,2113,2134,2141,2179,2214,2236,2241,2315,2366,2384,2396,2432,2461…	15,63,86,104,110,113,128,142,145,150,153,174,210,216,231,236,302,321,323,332,419,420,425,466,499,504,505,514,527,597,598,624,643,652,677,701,728,730,740,768,782,787,789,808,847,901,906,971,980,1037,1040,1120,1123,1139,1205,1209,1247,1317,1407,1432,1443,1494,1505,1516,1532,1546,1576,1614,1629,1651,1666,1671,1717,1759,1761,1777,1852,1883,1910,1990,1997,1999,2012,2023,2032,2067,2086,2088,2113,2134,2…	ABR,ADRBK1,AKAP12,ANGPT2,ARHGAP44,ARID5A,ARL4D,ATP2A3,ATP6V0C,B3GALNT1,CABIN1,CCR2,CD38,CDKN1A,CEACAM1,CHST12,DPYSL2,DUSP6,EHBP1L1,FAM174B,FZD1,GABRR2,GM2A,HPCAL1,IGF1R,ITGA4,LILRB2,MAD1L1,MAST4,MYB,OR2B2,PARVB,PLD1,PPAP2B,PRLR,PXN,RAPGEF1,RBMS3,RHOBTB3,RXRA,SEPT10,SEPT9,SERPINE2,SFTPB,SLC25A1,SLC4A10,SPG20,SPRED2,TBC1D1,THBS1,TNFRSF1B,WNT5A	ABR,ACAP1,ACVR2A,ADAMTS3,ADAMTS6,ADRBK1,AEBP1,AKAP12,AKR1D1,ANGPT2,ANXA1,ARHGAP44,ARHGEF1,ARID5A,ARL4D,ARMCX1,ATF5,ATP11A,ATP2A3,ATP5D,ATP6V0C,B3GALNT1,BLK,BPIFA1,BTG2,C1orf159,CABIN1,CAPG,CASP10,CBX4,CCR2,CD38,CD5,CD6,CD9,CDK10,CDKN1A,CEACAM1,CEBPD,CHST12,CLCN5,CLEC2B,CLPTM1,CNR1,COMMD4,COPE,CPT1A,CR2,CRIP1,CRY1,CTSF,CXCR3,CYP2A6,DAPK3,DCAF15,DIAPH1,DMD,DNAJB2,DNM2,DPYSL2,DUSP5,DUSP6,EFHC2,EGLN3…
MSigDB Perturbation	SARTIPY_NORMAL_AT_INSULIN_RESISTANCE_UP	Genes up-regulated in 3T3-L1 cells (adipocyte) by insulin [GeneID=3630] which continued to respond normally to insulin in the insulin resistant cells.	94	0.000104683	0.352154	0.00374632	2.27344	11.4364	26	349	0.0113636	0.0744986	10	33	33	14,80,110,225,240,446,499,504,527,538,544,677,701,718,742,1206,1263,1672,1680,1802,1910,1944,2100,2122,2475,2684	14,80,110,225,240,446,499,504,527,538,544,677,701,718,742,1206,1263,1672,1680,1802,1910,1944,2100,2122,2475,2684,2713,3088,3266,3286,3430,3488,3691,3798,3861,3976,4017,4051,4077,4087,4190,4274,4303,4450,4572,4689,4841,5201,5545,5717,5742,6597,6632,6773,6824,6881,6988,7012,7030,7213,7414,7464,7840,7917,8000,8382,9131,9583,9584,9601,9664,9790,9849,9890,10027,10114,10193,10328,10457,10547,11056,1127…	B3GNT2,BHLHE40,DUSP6,IER2,MAK16,PHLDA1,PTGES,SLC2A1,SPRED2,THBS1	AMOTL2,B3GNT2,BHLHE40,BYSL,CCL2,CCL7,CCRN4L,CDR2,DUSP6,EGR1,EGR2,EREG,FOSL1,HMGCR,HMOX1,IER2,MAK16,NOP56,NOP58,PHLDA1,PPAN,PTGES,SLC25A28,SLC2A1,SOCS3,SPRED2,SPSB1,SRXN1,STK40,SYNJ2,THBS1,TUBB2A,TUBB6
MSigDB Perturbation	CREIGHTON_ENDOCRINE_THERAPY_RESISTANCE_4	The 'group 4 set' of genes associated with acquired endocrine therapy resistance in breast tumors expressing ESR1 but not ERBB2 [GeneID=2099;2064].	95	0.000105382	0.354506	0.00373165	1.41259	85.6583	121	2614	0.0528846	0.0462892	68	283	289	10,18,31,54,64,67,105,131,160,185,187,201,212,217,235,237,250,253,289,338,378,414,417,441,481,525,560,566,570,586,602,639,640,643,695,709,736,738,742,751,752,785,786,791,801,806,813,871,875,904,917,938,980,1011,1059,1108,1120,1136,1154,1164,1171,1182,1194,1263,1319,1368,1374,1386,1401,1407,1472,1486,1491,1496,1561,1583,1592,1710,1778,1783,1839,1842,1843,1927,1942,1956,2072,2079,2086,2100,2122,213…	10,18,31,54,64,67,105,131,160,185,187,201,212,217,235,237,250,253,289,338,378,414,417,441,456,481,525,560,566,570,586,602,639,640,643,695,709,736,738,742,751,752,785,786,791,801,806,813,871,875,904,917,938,980,1011,1059,1072,1108,1117,1120,1136,1154,1164,1171,1182,1194,1263,1319,1368,1374,1386,1401,1407,1417,1424,1469,1472,1477,1486,1491,1496,1561,1583,1592,1663,1710,1774,1778,1783,1839,1840,1842…	ADCY9,ADD3,AFF1,APLP2,ATP2B4,BAG3,BCL2,BHLHE40,CADM1,CBX2,CCNB1,CD97,CECR5,CHN1,COL5A1,CXCL12,CYB5A,ELOVL5,EMP2,FDFT1,FGG,FLNB,FOXK2,GNPDA1,HMGN3,HPCAL1,IGF1R,JARID2,KIF20A,KPNB1,LAMP2,LYPLAL1,MED13L,MOCS2,MPPED2,MRC2,MYB,MYC,NRIP1,NT5DC3,PAPSS2,PARP4,PI15,PIK3R1,PLAC1,PNPLA3,PPP1R7,PUS1,RBBP8,RHBDF2,RHOBTB3,RHOQ,RPS6KA3,SAV1,SCUBE2,SLC22A5,SNURF,SPG20,SRI,SRSF7,ST8SIA4,SULF1,TARS2,TIMM9,TIPARP,T…	ABAT,ADAMTS15,ADAMTS19,ADCK2,ADCY9,ADD3,ADORA1,AFAP1L2,AFF1,AK4,AMFR,APEX1,APH1B,APLP2,APTX,ARHGAP36,ASS1,ATP2B4,ATRNL1,BAG3,BBIP1,BCL2,BHLHE40,BMPER,BOD1,BYSL,C21orf33,C2orf49,C8orf44-SGK3,CA12,CADM1,CALCR,CBX2,CCNA1,CCNB1,CD97,CDV3,CECR5,CELSR2,CEP68,CHN1,COA4,COL4A5,COL5A1,COPRS,COX15,COX6C,CPE,CXCL12,CYB5A,CYP1B1,DDX19A,DFFA,DHCR7,DHTKD1,DLC1,DLG5,DOK7,DPY30,DSCAM,DVL2,EGR3,EHMT2,ELOVL2,ELOVL…
MSigDB Perturbation	LEE_BMP2_TARGETS_UP	Genes up-regulated in uterus upon knockout of BMP2 [GeneID=650].	96	0.000113582	0.382089	0.0039801	1.26276	190.06	240	5800	0.104895	0.0413793	147	698	717	12,32,47,51,61,67,68,81,84,85,98,103,127,129,131,138,146,148,151,154,158,183,184,185,190,213,214,217,218,245,263,270,278,280,290,310,325,345,356,361,373,382,386,392,396,403,414,424,434,453,454,460,471,475,482,492,493,494,509,510,518,526,546,560,567,577,581,585,591,597,613,643,644,647,660,670,679,680,684,689,691,709,736,737,739,749,791,805,824,827,829,834,866,871,888,903,910,914,936,942,948,951,96…	12,32,47,51,61,67,68,81,84,85,98,103,127,129,131,138,146,148,151,154,158,183,184,185,190,213,214,217,218,245,263,270,278,280,286,290,310,325,345,356,361,373,382,386,392,396,403,414,421,424,430,434,438,453,454,460,471,475,482,492,493,494,509,510,518,526,546,560,567,577,581,585,591,597,613,643,644,647,660,670,679,680,684,689,691,709,724,736,737,739,749,791,805,814,824,827,829,834,845,866,871,888,90…
68282,68291,68296,68307,68345,68351,68353,68360,68378,68397,68400,68413,68414,68417,68424,68429,68434,68450,68453,68456,68482,68503,68545,68570,68581,68587,68588,68590,68591,68627,68662,68673,68678,68693,68705,68712,68745,68752,68764,68767,68779,68782,68800,68803,68815,68851,68863,68864,68865,68872,68887,68888,68912,68931,68944,68945,68946,68959,68960,68978,68994,68999,69017,69021,69036,69042,690…	ACPL2,ACSL4,ADAMTSL1,ADCK3,ADCY4,AGO1,AGTR1,AK3,ALCAM,AMPD3,ANK3,ANPEP,ASB2,ASCC1,BCAT1,BCL2L11,BSPRY,BTG1,C10orf54,C1GALT1,CALML4,CDH13,CHCHD10,CLEC14A,CLSTN1,COL5A1,CP,CPXM2,CRISPLD2,CRYL1,CTSB,CTSD,CXCL12,CXCL17,CYP27A1,DAP,DDB2,DDIT4,DDIT4L,DDR1,DEGS2,DIO2,DPP4,EDNRA,EMP2,ERN1,EXPH5,FAM20C,FAM213A,FBXL20,FNBP1,FOXO1,FOXO3,FUCA1,FZD7,GABRP,GBP4,GNG2,GPR126,H1F0,HIST3H2A,HK1,IER3,IL18,IRF2,ITGB…	AAMDC,AARD,ABCA1,ABCA9,ABCB1,ABHD14B,ABHD4,ACACB,ACAD8,ACPL2,ACSL4,ADAMTSL1,ADCK3,ADCY4,ADCY6,ADHFE1,ADRA2A,AEBP1,AFAP1L2,AFF2,AGO1,AGRN,AGTR1,AHNAK2,AK3,ALCAM,ALDH1A2,ALDH6A1,ALOX15,AMHR2,AMPD3,ANGPTL2,ANGPTL7,ANK3,ANPEP,ANXA6,AOC3,AOX1,APOBEC1,APOBEC3B,APOD,APOE,APPL2,AQP1,AQP8,AR,ARF5,ARHGAP6,ARHGEF26,ARL4C,ARMC10,ARNT2,ASB2,ASCC1,ASPG,ATHL1,ATP1A2,ATP1B1,ATP1B2,ATP2B2,ATP8A1,AXIN2,BACE2,BCAT1…
MSigDB Perturbation	PICCALUGA_ANGIOIMMUNOBLASTIC_LYMPHOMA_UP	Up-regulated genes in angioimmunoblastic lymphoma (AILT) compared to normal T lymphocytes.	97	0.00011646	0.391771	0.00403887	1.49836	60.0656	90	1833	0.0393357	0.0490998	48	195	201	51,63,79,84,107,108,119,127,142,153,204,205,236,263,274,294,302,325,368,382,396,420,448,452,459,512,546,584,598,644,668,781,791,809,825,832,835,877,956,958,961,966,977,1079,1086,1091,1108,1120,1147,1158,1201,1274,1286,1316,1421,1546,1648,1671,1728,1812,1853,1869,1877,1942,1969,1984,2011,2020,2021,2065,2072,2088,2144,2146,2171,2185,2193,2202,2211,2230,2284,2343,2386,2481,2484,2561,2604,2607,2675,2…	51,63,79,84,107,108,119,127,142,153,204,205,236,263,274,286,294,302,325,368,382,396,420,430,448,452,459,512,546,584,598,644,668,727,781,791,809,825,832,835,877,956,958,961,966,977,1026,1079,1086,1091,1108,1120,1141,1147,1158,1201,1204,1274,1286,1316,1380,1421,1546,1648,1671,1684,1728,1812,1853,1869,1872,1877,1942,1958,1969,1984,2011,2020,2021,2051,2065,2072,2088,2137,2144,2146,2171,2185,2193,2202…	ACVRL1,ADAMTS9,ANK2,ARHGEF10,ATOX1,CD93,COL15A1,COL4A2,COL8A2,CP,CTSC,CXCL12,CYFIP1,CYP26B1,CYP27A1,DCLK1,DHRS7B,EMCN,FLRT2,FUCA1,GJA1,IDH1,IL18,IRAK3,ITGA9,ITPRIPL2,LPAR1,LUM,MARCKS,MXRA5,PAPSS2,PDLIM5,PLA2G2D,PLA2G4C,PLD1,PMP22,PPAP2B,RAI14,RBPMS,RHOBTB3,RND3,SEPT10,SERPING1,SMOC2,SULF1,TNS1,WDFY3,WISP1	A2M,ABCC3,ABI3BP,ACTA2,ACVRL1,ADAMDEC1,ADAMTS1,ADAMTS9,ADRA2A,ANK2,ANTXR1,APOC1,APOE,ARHGAP29,ARHGAP42,ARHGEF10,ASPM,ATOX1,C10orf10,C1QA,C1QB,C1R,C1S,C2,C3,C7,C8orf4,CALD1,CAV2,CCDC80,CCL19,CCL2,CCL21,CD63,CD93,CDH11,CDH5,CETP,CHI3L1,CLU,CMKLR1,COL12A1,COL15A1,COL1A1,COL1A2,COL3A1,COL4A1,COL4A2,COL6A1,COL8A2,COX7A1,CP,CSRP2,CTHRC1,CTSC,CTSL,CTTNBP2NL,CXCL10,CXCL11,CXCL12,CXCL9,CYBRD1,CYFIP1,CYP1B…
MSigDB Perturbation	WU_CELL_MIGRATION	Genes associated with migration rate of 40 human bladder cancer cells.	98	0.0001198	0.403006	0.00411231	1.52956	53.6101	82	1636	0.0358392	0.0501223	42	174	182	21,67,75,80,84,110,195,208,239,241,244,307,308,320,325,440,446,449,473,499,504,508,555,564,572,592,622,628,631,650,675,677,778,781,835,866,930,936,961,1003,1008,1039,1097,1106,1120,1157,1163,1206,1207,1215,1221,1241,1270,1520,1555,1570,1575,1640,1648,1705,1728,1779,1845,1852,1869,1910,2033,2065,2214,2267,2273,2294,2323,2337,2393,2467,2555,2570,2609,2637,2675,2738	21,67,75,80,84,110,195,208,239,241,244,286,307,308,320,325,430,440,446,449,473,499,504,508,555,564,572,592,622,628,631,637,650,675,677,724,778,781,835,845,866,930,932,934,936,961,1003,1008,1039,1087,1097,1106,1120,1157,1163,1206,1207,1215,1221,1241,1247,1252,1270,1313,1474,1520,1555,1570,1575,1640,1648,1705,1728,1779,1845,1852,1869,1910,2033,2056,2065,2197,2214,2267,2273,2294,2323,2330,2335,2337,…	AKAP12,BICC1,CD55,CHST15,COL4A2,DCBLD2,DSE,EFNB2,EPAS1,EPB41L2,F2RL1,FGF2,GALNT3,GJA1,GRAMD3,IL1A,KCNK1,KLF5,KRT17,LAMA3,LOXL2,LPAR1,MAOA,MAP1B,MSN,NEDD9,PKP3,PTGES,RBPMS,RHOBTB3,SERPINE1,SFN,SMURF2,SNAI2,SOX9,SRGN,ST14,TGM2,THBS1,TNFRSF21,UGCG,WNT5A	ADAMTS1,ADIRF,AGR2,AHNAK2,AIM1,AKAP12,AKR1C1,AKR1C2,AKR1C3,AQP3,ARHGAP29,ARHGDIB,ARID5B,ARL4C,ASAH1,AXL,BICC1,BST2,CAPG,CD55,CDA,CDH1,CDH3,CHST15,CLDN4,CLDN7,CLU,COL18A1,COL4A1,COL4A2,COL6A2,CST6,CSTB,CTSH,CXADR,CXCL1,CYR61,DAPK1,DCBLD2,DKK3,DSE,DTX4,DYNLT3,EEF1A2,EFEMP1,EFNB2,EHF,EMP3,EPAS1,EPB41L2,EPCAM,EPS8,ERAP2,ESRP1,F2RL1,FABP5,FBLN1,FGF2,FKBP11,FN1,FOSL1,FXYD3,FYN,GALNT1,GALNT14,GALNT3,GAT…
MSigDB Perturbation	DELACROIX_RAR_BOUND_ES	Genes with DNA sequences bound by RARA and RARG [GeneID=5914, 5916] in ES cells.	99	0.000119887	0.403301	0.00407375	1.36085	107.286	146	3274	0.0638112	0.0445938	93	425	436	8,11,15,37,47,54,55,73,84,105,113,128,145,171,174,178,210,222,234,248,318,320,325,327,332,342,356,360,405,419,434,474,483,498,527,538,539,545,549,553,559,599,620,623,630,653,658,660,695,697,742,766,773,781,793,796,803,805,823,849,851,901,912,951,961,965,976,986,999,1001,1022,1034,1038,1047,1077,1118,1137,1145,1159,1160,1244,1263,1279,1312,1341,1347,1376,1495,1500,1534,1537,1553,1576,1617,1648,164…	8,11,15,37,47,54,55,73,84,105,113,128,145,171,174,178,210,222,234,248,318,320,325,327,332,342,356,360,405,419,434,474,483,498,527,538,539,545,549,553,559,599,620,623,630,653,658,660,695,697,742,766,773,781,793,796,803,805,823,849,851,901,912,951,961,965,976,986,999,1001,1022,1034,1038,1047,1077,1094,1101,1118,1137,1145,1159,1160,1203,1235,1244,1263,1279,1312,1313,1341,1347,1376,1380,1402,1434,146…	AANAT,AEBP2,AGTPBP1,AIPL1,ARF4,ATF3,ATP11B,ATXN2,BARHL1,BHLHE40,BRSK1,CD97,CITED2,COG6,CTGF,CTSD,CTSZ,CYSTM1,DHRS3,DISC1,DNAJB6,DNAJC22,DUSP4,FGF1,FGF4,GADD45G,GCH1,GFOD1,GHDC,GJA1,GSE1,GSR,HBEGF,HIVEP3,HOXA4,HOXA5,HS3ST3B1,IER2,ITGA5,ITPK1,ITPR1,KAT7,LEFTY2,MDK,MDM2,MED21,MINOS1-NBL1,MTSS1,MYCN,NTNG2,NUDT4,OTUD5,OTUD7B,PAK7,PARVB,PDK1,PEF1,PGPEP1,PIGL,PLEKHB1,PRMT8,PTH1R,RAB20,RAI1,RARB,RBPMS,RH…	AANAT,ABCB8,ACKR3,ACP6,ACTN4,AEBP2,AES,AGPAT1,AGPAT3,AGTPBP1,AGTRAP,AIPL1,AKAP1,ALKBH7,ALPL,AMACR,AMT,ANKRD28,ANP32A,AP5S1,APOBEC2,AQP3,ARF4,ARG1,AS3MT,ATF3,ATG14,ATG4D,ATP11B,ATP2A2,ATP5E,ATXN2,B3GNT7,BARHL1,BCAT2,BCKDHA,BCL3,BHLHE40,BMP4,BRE,BRSK1,BRWD1,C12orf52,C1QA,C1orf210,C1orf54,C7orf60,CA4,CALR,CAMK1,CAMK1D,CAPNS1,CCND1,CCP110,CD37,CD97,CDH1,CDX1,CEBPA,CELSR3,CENPM,CFL2,CIDEA,CITED2,CLN8,…
MSigDB Perturbation	GROSS_HYPOXIA_VIA_HIF1A_DN	Genes down-regulated in SEND cells (skin endothelium) at hypoxia after knockdown of HIF1A [GeneID=3091] by RNAi.	100	0.000127196	0.427887	0.00427887	1.63954	37.8155	62	1154	0.0270979	0.0537262	41	110	110	18,44,60,76,87,94,171,219,253,327,360,410,492,599,630,673,683,685,699,742,791,793,798,874,948,952,1007,1086,1136,1138,1192,1242,1263,1306,1350,1367,1534,1544,1561,1592,1597,1616,1637,1672,1706,1881,1924,1935,1951,1986,2021,2028,2072,2100,2122,2326,2443,2486,2572,2651,2726,2755	18,44,60,76,87,94,171,219,253,327,360,410,492,599,630,673,683,685,699,742,771,791,793,798,874,948,952,1007,1086,1115,1136,1138,1192,1242,1263,1306,1350,1367,1424,1534,1544,1561,1592,1597,1616,1637,1658,1672,1706,1840,1881,1891,1924,1935,1951,1986,2004,2013,2021,2028,2072,2100,2122,2138,2233,2326,2348,2443,2486,2560,2572,2608,2651,2726,2755,2780,2924,2960,2983,3015,3046,3155,3161,3195,3238,3260,33…	ACER3,ADM,ANKRD1,ARX,ATF3,ATP7A,BHLHE40,CAV1,CDC42EP3,CPD,CTGF,CXCL12,DAP,EDN1,EIF1B,ENO1,FOXG1,FOXO3,FST,GADD45G,HBEGF,IL18,INSIG2,KLF4,LHX9,LNPEP,MERTK,MYH9,PFKFB3,PRPF19,RPS6KA5,SAMSN1,SETX,SKIL,SLC2A1,SOAT1,SPRY2,TGIF1,TIAM2,TK2,VEGFA	ACAP2,ACER3,ADM,ANKRD1,ARL6IP5,ARX,ATF3,ATP7A,BHLHE40,BNIP3,C10orf10,C8orf4,CACNA1H,CAPN1,CAV1,CCRN4L,CCSAP,CDC42EP3,CPD,CSRNP1,CTGF,CXCL12,CYR61,DAP,DMP1,DNAJC5,DUSP14,DUSP3,EDN1,EIF1B,ENO1,ENO2,ERRFI1,FOS,FOXG1,FOXO3,FST,GADD45G,GAPDH,GBE1,GPRC5C,GYS1,GZF1,HBEGF,HIGD1A,HILPDA,IL18,INSIG2,IRX1,KIF5A,KLF10,KLF4,KLHL2,LHX9,LLGL1,LMO7,LNPEP,LRP5,LXN,ME2,MERTK,MINK1,MMP3,MMP8,MT1A,MTCP1,MYH9,NFKBIA,…
MSigDB Perturbation	SHAFFER_IRF4_TARGETS_IN_ACTIVATED_DENDRITIC_CELL	IRF4 [GeneID=3662] target genes up-regulated in plasmacytoid dendritic cells compared to monocytes.	101	0.000127681	0.429518	0.00425266	1.97793	17.6953	35	540	0.0152972	0.0648148	16	64	66	1.43148e+124	143,148,219,281,403,436,493,514,593,607,652,679,867,909,971,1170,1198,1202,1219,1261,1389,1454,1722,1761,1827,1889,1994,2016,2132,2151,2218,2330,2366,2384,2471,2521,2638,2686,2716,2802,2898,3027,3273,3517,3736,3782,3879,4019,4170,4308,4418,4647,4765,4914,4920,5157,5213,5233,5248,5306,5329,5434,5458,5487,5495,5506,5691,5787,5990,6140,6499,6585,6695,6717,6822,6850,6936,7095,7164,7401,7403,7433,7469…	BSPRY,CAV1,CD38,GTF2IRD1,HIVEP2,IRF4,ITGB7,MYB,PDS5A,PRDM1,RAB30,SETBP1,TNFAIP3,TXNDC5,UBE2J1,UCK2	ANKZF1,APOBEC3B,ATRX,AURKA,BLOC1S5-TXNDC5,BMI1,BSPRY,C11orf24,CANX,CASP3,CAV1,CD38,CDT1,COMMD3-BMI1,DDHD2,DNAJB9,DUSP5,E2F5,ELL2,FADS1,FHL1,FKBP11,GFPT1,GLDC,GLS,GNG7,GTF2IRD1,HIVEP2,HMMR,HSP90B1,IRF4,ISG20,ITGB7,MARS,MNAT1,MSMO1,MYB,PAICS,PDIA4,PDS5A,PIM2,PPP1R2,PRDM1,PRR7,RAB30,SEC61A2,SEPT11,SETBP1,SIRT3,SLAMF7,SLC38A2,SSR1,ST6GAL1,SUB1,TAF9B,TCERG1,TNFAIP3,TRAM1,TXNDC5,UAP1,UBE2J1,UCK2,UNG,WH…
MSigDB Perturbation	KRIEG_HYPOXIA_NOT_VIA_KDM3A	Genes induced under hypoxia independently of KDM3A [GeneID=55818] in RCC4 cells (renal carcinoma) expressing VHL [GeneID=7428].	102	0.000130637	0.439464	0.00430847	1.25636	195.009	245	5951	0.10708	0.0411695	158	693	703	3,6,11,17,24,31,42,55,83,84,86,104,121,147,148,158,160,162,180,193,194,216,227,235,238,243,250,255,260,265,290,306,316,321,326,338,367,377,378,392,396,400,401,403,409,410,417,447,449,466,470,475,481,484,485,493,507,509,512,527,542,552,562,572,586,590,603,624,630,635,636,659,660,662,699,705,708,715,728,739,742,743,744,769,782,787,788,793,797,798,810,838,855,875,880,893,907,912,919,931,935,941,946,…	3,6,11,17,24,31,42,55,83,84,86,104,121,147,148,158,160,162,180,193,194,216,227,229,235,238,243,250,255,260,265,290,306,316,321,326,338,367,377,378,392,396,400,401,403,409,410,417,447,449,466,470,475,481,484,485,493,507,509,512,519,527,542,552,562,572,586,590,601,603,624,630,635,636,659,660,662,690,699,705,708,715,728,739,742,743,744,769,782,787,788,793,797,798,810,838,855,875,880,893,907,912,919,…
5,66457,66459,66505,66523,66537,66543,66577,66583,66596,66602,66605,66608,66609,66610,66616,66617,66622,66642,66648,66652,66656,66659,66678,66712,66725,66745,66748,66780,66805,66824,66834,66843,66860,66920,66951,66957,66962,66968,66980,66983,66999,67005,67024,67049,67058,67066,67079,67123,67127,67160,67162,67167,67202,67206,67208,67210,67231,67237,67242,67247,67260,67264,67270,67273,67277,67285,6…	ADARB1,ADD3,ADPRHL2,AGPAT5,AKAP12,ANGPTL4,ARHGEF7,ARID5A,ARNTL,ARRDC3,ASAP1,ASAP2,ASXL1,BACH1,BHLHE40,BNIP3L,BOK,BTBD6,CABLES1,CADM1,CALM1,CAPN12,CARS2,CCNG1,CCR1,CD44,CEP95,CHN1,CHRAC1,CNOT11,CP,CTGF,CTNNB1,CYTH3,DDB2,DDIT4,DISC1,DNAJB6,DPYSL2,DRAM1,DSC2,EHBP1L1,EHD2,ENO1,ENSG00000143674,EPAS1,FAM134B,FAM162A,FAM53B,FNBP1,FZD1,GADD45A,GCLC,GRSF1,H3F3A,HIVEP2,HK1,HS3ST3A1,IER3,INSIG2,ITGB5,JAK1,K…	ABCB6,ABTB2,ACAT2,ACTG1,ADAM10,ADAMTS3,ADARB1,ADC,ADD3,ADPRHL2,ADRBK2,AGPAT5,AIFM2,AK4,AKAP12,AKAP2,ALDH18A1,ALDOA,ALDOC,ALKBH5,AMPD2,ANG,ANGPTL4,ANKLE2,ANKZF1,ANO6,ANTXR1,ANXA3,AP1S2,APOL1,APOL2,ARFIP2,ARHGAP27,ARHGEF7,ARID3B,ARID5A,ARL4C,ARNTL,ARRDC3,ASAP1,ASAP2,ASF1B,ASXL1,ATAD2,ATG9A,ATP1B1,ATRX,AVPI1,AXIN1,B4GALNT4,BACE2,BACH1,BCKDK,BCL2L1,BFAR,BFSP1,BHLHE40,BID,BIRC5,BNIP3,BNIP3L,BOK,BTBD6,…
MSigDB Perturbation	WILLIAMS_ESR1_TARGETS_DN	The 'ER-alpha profile': genes down-regulated in T47D cells (breast cancer, ESR2 [GeneID=2100] Tet-Off) upon activation of ESR1 [GeneID=2099] by estradiol (E2) [PubChem=5757].	103	0.000132637	0.44619	0.00433194	4.18036	2.39214	10	73	0.00437063	0.136986	2	5	6	7.52392e+31	75,239,241,440,508,564,622,1130,1555,1845,3630,3983,4752,5215,7989,8251,11071,12650,13014,14016,14647,15134,15757,16541,17369,18018,20496,21526,22350,22504,24470,30005,30139,31401,32149,32484,37436,38010,38590,39150,39686,40795,44028,44045,44087,44115,46593,47591,47864,48248,48379,48840,49802,50056,50828,51233,51242,51293,54352,54862,55327,56103,56980,59248,66374,66377,68343,68672,69095,69240,697…	EFNB2,ZFP36L2	CYP1A1,EFNB2,S1PR3,TP53INP1,ZFP36L2
MSigDB Perturbation	FLECHNER_PBL_KIDNEY_TRANSPLANT_OK_VS_DONOR_UP	Genes upregulated in peripheral blood lymphocytes (PBL) from patients with well functioning kidneys more than 1-year post transplant compared to those from normal living kidney donors.	104	0.00013346	0.448958	0.00431691	1.65943	35.5544	59	1085	0.0257867	0.0543779	31	155	162	26,47,71,131,171,185,212,217,341,397,414,434,449,474,599,624,663,736,737,749,752,810,820,823,831,871,969,1069,1137,1180,1214,1288,1374,1401,1435,1486,1537,1573,1688,1752,1770,1803,1883,1994,2070,2125,2210,2266,2316,2337,2469,2501,2511,2512,2534,2554,2668,2705,2742	26,47,71,131,171,185,212,217,341,397,414,434,437,449,474,599,624,638,663,710,736,737,749,752,810,820,823,831,871,925,969,1069,1137,1180,1214,1288,1374,1401,1435,1486,1537,1573,1670,1688,1752,1770,1803,1883,1888,1923,1994,2070,2125,2210,2266,2316,2331,2332,2337,2469,2501,2511,2512,2534,2554,2668,2705,2742,2771,2783,2806,2859,2871,2903,2974,3002,3136,3352,3362,3368,3432,3450,3467,3667,3707,3712,374…	ARID5A,CAPZB,CTSD,CUL4B,HBEGF,IKBKE,KLF6,LAMP2,MORC3,MTMR1,NCOR2,NUBP1,NUMB,OXA1L,PCF11,PIK3R1,PRKAR1A,RBPJ,RPL35,RPLP0,RPS20,SATB1,SRSF3,STK38,SYNCRIP,TMCC1,TOP2B,TRAF3IP3,UGCG,VAV1,WIPF2	AASDHPPT,ACO2,ACTB,AGL,AHNAK,ALOX5AP,ANAPC13,ANP32B,ARHGAP1,ARID5A,ATP5A1,ATP5G1,BICD2,BMS1,BPHL,BTN3A2,CAD,CAMKK2,CAPZB,CCT7,CD58,CDIPT,CHD3,CLEC11A,CLTC,CLU,CPNE1,CTSD,CTSK,CUL4B,CYC1,DAP3,DCTD,DEDD,DHX9,EEF1B2,EIF3F,ENSG00000256646,FLT3LG,FTH1,GNB2L1,GSPT1,HAX1,HBEGF,HIPK1,HIST1H4A,HIST1H4C,HIST1H4E,HIST1H4H,HIST1H4I,HIST1H4J,HIST1H4L,HIST4H4,HYOU1,IK,IKBKE,IL2RG,IMMT,IPCEF1,ITGB1,JUND,KLF6,KL…
MSigDB Perturbation	SENESE_HDAC1_AND_HDAC2_TARGETS_UP	Genes up-regulated in U2OS cells (osteosarcoma) upon knockdown of both HDAC1 and HDAC2 [GeneID=3065;3066] by RNAi.	105	0.000137999	0.464228	0.00442122	1.4427	72.78	105	2221	0.0458916	0.047276	60	219	224	11,21,39,73,115,137,141,143,192,252,307,329,331,399,473,485,507,517,520,527,544,563,565,577,628,650,687,704,718,778,824,836,864,869,982,1006,1038,1042,1089,1099,1106,1118,1159,1172,1190,1207,1217,1221,1248,1261,1270,1272,1309,1325,1351,1392,1412,1452,1460,1479,1495,1565,1570,1679,1686,1694,1706,1727,1760,1766,1779,1802,1825,1875,1883,1889,1890,2016,2040,2043,2132,2176,2202,2256,2271,2282,2308,230…	11,21,39,73,115,137,141,143,192,252,307,329,331,399,473,485,507,517,520,527,544,563,565,577,628,638,650,687,704,718,762,778,824,836,864,869,982,1006,1038,1042,1089,1099,1106,1118,1159,1172,1190,1207,1217,1221,1235,1248,1261,1270,1272,1309,1325,1351,1392,1412,1452,1453,1460,1479,1495,1565,1570,1679,1686,1694,1706,1727,1760,1766,1779,1786,1802,1825,1875,1883,1889,1890,1909,2016,2040,2043,2132,2176,…	AFF3,AGO2,ANTXR2,ATP11B,BMP2,CAMTA1,CCL20,CCND2,CCNE1,CD55,CDC42SE2,CHRNA9,CHST11,DCLK1,DKK1,DKK2,ELK3,EPHA4,FRMD4A,GCH1,HIP1,HMGA1,IL1A,IL6ST,ITGA6,MAFF,MAOA,MAP3K7CL,NAMPT,OLAH,OTUB2,PCGF5,PDE4DIP,PHLDA1,PPARA,PPIF,PPTC7,PRDM1,PSTPIP2,PTPN12,PTPRN2,PXN,RAB35,RRAGD,SFRP1,SH2B3,SIPA1L3,SNAP23,SPHK1,SPIRE1,SPOPL,SPRED2,SRGN,ST3GAL1,SUPT16H,TGFBR2,TGM2,TMEM65,TNFAIP3,ZBTB38	AADAC,ACRC,ADAMTS17,ADAMTS6,AFF3,AGO2,AGPAT9,ANTXR2,AP1S2,ATP11B,BCL2A1,BCL2L1,BICD2,BIRC3,BMP2,C3,C4orf26,CA2,CAMTA1,CANT1,CAPN5,CBFB,CCL20,CCND2,CCNE1,CD55,CDC42SE2,CDV3,CES1,CHRNA9,CHST11,COL6A3,COPA,CPEB4,CREM,CSF2,CTNNA1,CXCL3,CXCL5,DCLK1,DDX42,DHX9,DKK1,DKK2,DNAJB14,DOCK4,DPY19L1,EGFR,EIF4G1,ELK3,ELMOD1,ELTD1,EPHA4,EPHB1,EREG,ESYT2,EXOC5,EXTL3,FAM19A5,FAM9B,FGFRL1,FKBP1B,FN1,FOSL1,FRMD4A,G0…
MSigDB Perturbation	SCHEIDEREIT_IKK_TARGETS	Genes encoding substrates of IkappaB kinase (IKK) complex.	106	0.000146877	0.494094	0.00466127	2.41498	9.10979	22	278	0.00961539	0.0791367	6	18	20	3.72225e+78	37,222,492,663,766,820,907,969,1022,1077,1131,1138,1143,1322,1573,1658,1770,1776,2198,2251,2316,2477,2636,2705,2708,2859,2924,3050,3071,3734,3753,3881,4091,4156,4979,5101,5181,5354,5604,5710,5942,5966,6236,6539,6630,6642,6703,7189,7250,7582,7792,7798,8047,8174,8554,8794,9355,9525,9586,9713,9876,10282,10448,11075,11274,11722,11835,12018,12254,13187,13324,13506,13641,13687,13904,13961,13981,14634,1…	CTNNB1,ESR1,FOXO3,NCOA3,NCOR2,RELA	BCL10,CCND1,CTNNB1,CYLD,DOK1,ESR1,FOXO3,HIST2H3D,IRS1,NCOA3,NCOR2,NFKB1,NFKB2,NFKBIA,NFKBIB,NFKBID,RELA,YWHAB
MSigDB Perturbation	ZHENG_FOXP3_TARGETS_IN_THYMUS_UP	Genes with promoters bound by FOXP3 [GeneID=50943] and which are up-regulated only in developing (located in the thymus) regulatory CD4+ [GeneID=920] T lymphocytes.	107	0.000152379	0.512603	0.00479068	1.39117	89.8527	125	2742	0.0546329	0.0455872	57	182	182	32,37,39,77,115,122,131,148,152,172,178,185,217,218,222,226,228,271,275,277,279,329,343,351,403,414,417,423,426,429,461,474,493,515,537,593,620,623,655,676,736,737,751,754,766,780,823,827,836,871,886,914,928,942,978,982,1022,1032,1039,1052,1065,1070,1077,1100,1130,1137,1143,1170,1180,1182,1201,1219,1258,1273,1325,1374,1378,1389,1401,1426,1458,1498,1531,1638,1775,1799,1805,1839,1886,1915,1922,1944…	32,37,39,77,115,122,131,148,152,172,178,185,217,218,222,226,228,254,271,275,277,279,329,343,351,403,414,417,423,426,429,437,461,474,493,515,537,593,620,623,655,676,736,737,751,754,766,780,823,827,836,871,886,914,928,942,978,982,1022,1032,1039,1052,1065,1070,1077,1098,1100,1130,1137,1143,1168,1170,1180,1182,1201,1219,1258,1273,1325,1374,1378,1389,1401,1424,1426,1456,1458,1498,1531,1638,1658,1759,1…	ADD3,AKAP13,ARHGEF10,ARHGEF3,ARL4A,ATG16L1,B3GNT2,BLOC1S5,C2CD5,CDK19,CITED2,DENND5A,DENND6A,ELK3,F2RL1,FAM69A,FAM76B,FEM1C,GLCCI1,GPR183,HIF1A,HIVEP2,IFNAR2,INPP4B,IRF4,ITGA6,JARID2,KAT6B,KLF3,KLF6,LRIF1,LTA4H,MAN1A1,MAP3K5,MTFR1,MYO9A,NCOA3,NEK7,NR3C1,NSMCE2,PDE4B,PIK3R1,PPP2R5C,RAPGEF6,SAMHD1,SLA,SOCS2,SRI,STAT5B,TBC1D5,TNFAIP3,TOP1,TOP2B,VOPP1,WNK1,ZC3HAV1,ZFP36L2	ABT1,ABTB2,ADD3,AKAP13,ANKRD12,AP4S1,ARHGAP15,ARHGAP5,ARHGEF10,ARHGEF3,ARID5B,ARL4A,ASXL2,ATG16L1,ATP2B1,ATP6V1A,B3GNT2,BLOC1S5,BTBD10,C2CD5,CAST,CBLB,CD28,CD69,CD84,CDK17,CDK19,CDK2,CELF2,CHD9,CITED2,CNOT2,CNOT6L,CPE,CPOX,CXCR4,DBF4,DCTN6,DENND5A,DENND6A,DOCK10,DUSP22,ELF1,ELK3,ENSG00000256206,ERRFI1,ESD,ETNK1,ETS1,EVI5,EXOC6B,EXT1,F2RL1,FAM105B,FAM3C,FAM69A,FAM76B,FAM8A1,FEM1C,GALNT4,GDI2,GLCCI…
MSigDB Perturbation	WOO_LIVER_CANCER_RECURRENCE_DN	Genes negatively correlated with recurrence free survival in patients with hepatitis B-related (HBV) hepatocellular carcinoma (HCC).	108	0.000156741	0.527276	0.00488218	2.00208	16.4828	33	503	0.0144231	0.0656064	18	78	81	51,92,153,234,249,263,420,489,530,546,602,628,719,755,811,869,998,1414,1583,1772,1864,1890,1949,2000,2088,2117,2249,2484,2538,2597,2607,2616,2732	51,92,153,234,249,263,420,489,530,546,602,628,719,755,811,869,998,1149,1247,1414,1504,1583,1772,1864,1890,1949,2000,2088,2117,2249,2484,2538,2597,2607,2616,2732,2903,2943,3114,3211,3565,3685,4306,4379,4726,4758,4789,4910,4921,5054,5056,5197,5236,5241,5288,5432,5493,5520,5542,5559,5630,5669,5696,5716,5840,6072,6226,6369,6399,6402,6415,6456,6702,6801,6972,7528,7702,7875,8315,8344,8380,8423,8472,851…	ADH1B,ALAS1,C4BPA,CRYL1,CYB5A,CYP27A1,FMO4,GLUD2,GOT2,PAH,PEMT,POR,PPAP2B,PPARA,SARDH,SERPING1,SLC25A15,SUOX	AASS,ACAA1,ACADSB,ACOX2,ACSL5,ACY1,ADH1B,ADH5,ALAS1,ALDH1L1,ALDH3A2,APOC3,APOC4,APOL6,BPHL,C4BPA,C4BPB,CA14,CA5A,CAT,CPS1,CRAT,CRYL1,CSAD,CYB5A,CYP27A1,CYP2C9,CYP2E1,CYP2J2,CYP3A43,CYP4F2,CYP4F3,DAO,DCXR,ECHS1,ECI1,EPHX1,EPHX2,FMO4,G6PC,GCDH,GLUD1,GLUD2,GLUL,GOT2,GPT,HGD,HNF4A,HPD,HSD17B4,LDLR,MASP2,MAT1A,MTTP,NHEJ1,PAH,PAOX,PC,PCK2,PCTP,PCYT2,PEMT,PIPOX,PLIN1,POR,PPAP2B,PPARA,QDPR,SARDH,SERPING1…
MSigDB Perturbation	VERRECCHIA_RESPONSE_TO_TGFB1_C5	Cluster 5: ECM related genes up-regulated in dermal fibroblasts later than 30 min after TGFB1 [GeneID=7040] addition; decreased slowly after the peak at 120 min time point.	109	0.000163573	0.550259	0.00504825	2.87215	5.57074	16	170	0.00699301	0.0941176	7	20	21	1.11426e+59	111,425,568,907,1125,1282,1322,1339,1347,1364,2461,2487,2497,2581,2636,2708,2829,2866,4161,4177,4267,4465,4953,5132,5422,5526,5780,5801,6497,7158,8072,8970,9110,9142,9164,9333,9525,9879,10310,10562,10780,11038,11835,12957,13314,15398,16639,17739,17811,17883,17901,18049,18098,18663,19289,19858,20854,21671,22305,22654,24401,24508,25057,25073,26299,26632,27377,27749,27810,27965,28719,28886,29091,297…	CTNNB1,DDR1,DVL3,EFNA5,ITGA4,ITGA5,ITGB8	ARHGAP1,CTNNA1,CTNNB1,DDR1,DVL3,EFNA5,EPHA2,ILK,ITGA4,ITGA5,ITGB3,ITGB8,MMP11,MMP2,NME4,RHOD,SEMA3F,SMO,TNFRSF1A,WNT8B
MSigDB Perturbation	BERTUCCI_INVASIVE_CARCINOMA_DUCTAL_VS_LOBULAR_DN	Genes down-regulated in the invasive ductal carcinoma (IDC) compared to the invasive lobular carcinoma (ILC), the two major pathological types of breast cancer.	110	0.000164488	0.553336	0.00503033	2.04765	15.1393	31	462	0.013549	0.0670996	14	42	43	15,88,113,127,128,145,174,210,219,270,332,375,399,406,419,644,1039,1351,1423,1576,1605,1772,1814,1916,2082,2085,2539,2575,2579,2654,2730	15,88,113,127,128,145,174,210,219,270,332,375,399,406,419,644,1039,1351,1423,1576,1605,1772,1814,1827,1872,1882,1916,2082,2085,2539,2575,2579,2654,2730,3192,3213,3366,3525,3548,3693,3720,3761,3772,3872,3936,4058,4187,4522,4795,4819,4845,5106,5211,5401,5419,5715,6283,6320,6327,6393,6484,6526,6641,6817,6921,7038,7044,7108,7117,7239,7261,7279,7318,7319,7485,7514,7801,7992,8096,8105,8153,8304,8563,85…	ADCY2,CAV1,CD34,EMCN,F2R,IGF1,MARCH7,NGFR,PIK3CD,RCSD1,SEPP1,SFRP1,TGFBR2,TNFRSF1B	ABCA6,ADAM11,ADCY2,ADIPOQ,ALDH1A1,ALDH1L1,CAV1,CD34,CIDEC,DPT,ELN,EMCN,ERG,F2R,FOXN3,GDPD2,IGF1,MARCH7,MFAP4,MMP3,MRGPRF,NECAB1,NGFR,OMD,PDK4,PIK3CD,POU2F2,RBP4,RCSD1,RPL31,RPL34,SEPP1,SFRP1,SPARCL1,TEK,TF,TGFBR2,TNFRSF1B,TNXB,TUBB6,TXNIP,VWF
MSigDB Perturbation	CUI_TCF21_TARGETS_2_DN	All significantly down-regulated genes in kidney glomeruli isolated from TCF21 [Gene ID=6943] knockout mice.	111	0.00016575	0.557584	0.00502328	1.19928	291.841	350	8906	0.152972	0.0392993	205	785	799	6,8,17,19,32,33,37,40,42,45,49,57,58,60,65,73,75,76,77,87,94,96,101,105,110,112,127,137,143,146,148,153,172,180,183,193,200,214,218,222,232,239,241,255,258,265,276,298,299,301,325,326,328,334,338,339,347,351,356,361,362,364,376,378,380,385,390,391,396,398,403,416,420,424,425,427,440,447,457,475,480,484,487,493,498,499,504,507,508,514,517,527,537,540,554,564,565,566,567,572,575,578,580,595,603,608…	6,8,17,19,32,33,37,40,42,45,49,57,58,60,65,73,75,76,77,87,94,96,101,105,110,112,127,137,143,146,148,153,172,180,183,193,200,214,218,222,232,239,241,255,258,265,276,298,299,301,325,326,328,334,338,339,347,351,356,361,362,364,376,378,380,385,390,391,396,398,403,416,420,424,425,427,440,447,457,475,480,484,487,493,498,499,504,507,508,514,517,527,537,540,554,564,565,566,567,572,575,578,580,595,603,608…
,43921,43935,43948,43952,43966,43977,44003,44006,44016,44026,44031,44036,44041,44050,44055,44068,44069,44084,44086,44091,44093,44094,44099,44109,44111,44115,44118,44121,44125,44136,44146,44148,44154,44155,44159,44169,44179,44186,44190,44198,44203,44204,44209,44210,44213,44216,44229,44238,44256,44257,44260,44261,44262,44263,44275,44279,44289,44290,44295,44313,44315,44327,44330,44349,44350,44353,44…	ACKR5,ACSL4,ADM,AGO4,AGTR1,AMY1C,AP4E1,ARAF,ARAP2,ARHGAP17,ARHGAP26,ARHGAP31,ARHGEF18,ARL8B,ARRDC3,ATG10,ATP10A,ATP2A3,ATP7A,BBX,C10orf11,C1GALT1C1,CABLES1,CALCRL,CALM1,CAMK2D,CD38,CD55,CD97,CDC14A,CDC42EP3,CEBPB,CERS6,CITED2,CLEC14A,CLIC5,CSNK1G3,CTGF,DAAM2,DACH1,DENND6A,DKK2,DNAJB6,DOCK5,DPP4,DPYSL2,DTNA,DUSP6,EBF1,EDEM3,EFNB2,EMCN,ENDOD1,EPAS1,EXOC3L2,FAM134B,FAM174A,FAM174B,FAM49A,FAM49B,FMNL…	ABCA5,ABCB1,ABLIM3,ACAP2,ACBD5,ACER2,ACKR3,ACKR5,ACOX1,ACSL4,ADAM9,ADAMTS16,ADAMTS5,ADCY1,ADM,AFAP1L2,AGFG1,AGO4,AGTR1,AHNAK,AIF1L,AK1,AKAP2,AKIRIN1,AMOTL1,AMY1A,AMY1B,AMY1C,ANXA1,ANXA4,AP4E1,AP5M1,APBB2,ARAF,ARAP2,ARHGAP17,ARHGAP24,ARHGAP26,ARHGAP28,ARHGAP29,ARHGAP31,ARHGAP5,ARHGEF15,ARHGEF16,ARHGEF18,ARHGEF26,ARID4A,ARID5B,ARL13B,ARL8B,ARMCX1,ARMCX3,ARNT,ARRB1,ARRDC3,ART3,ARVCF,ASH1L,ATG10,ATG4…
MSigDB Perturbation	BERENJENO_TRANSFORMED_BY_RHOA_UP	Genes up-regulated in NIH3T3 cells (fibroblasts) transformed by expression of contitutively active (Q63L) form of RHOA [GeneID=387] off plasmid vector.	112	0.000166676	0.560697	0.00500622	1.32032	127.242	168	3883	0.0734266	0.0432655	101	527	531	14,30,60,71,75,78,94,110,115,129,148,156,171,225,226,239,240,241,279,288,289,309,337,356,368,396,398,400,401,403,440,470,481,493,499,504,508,525,535,544,562,564,599,605,613,622,630,647,650,662,668,673,677,701,705,708,716,718,735,781,785,793,801,803,806,836,838,846,856,857,880,882,902,930,931,933,941,977,982,986,1035,1057,1061,1085,1091,1145,1166,1170,1171,1198,1214,1219,1221,1241,1269,1300,1301,1…	14,30,60,71,75,78,94,110,115,129,148,156,171,225,226,239,240,241,279,288,289,309,337,356,368,396,398,400,401,403,440,470,481,493,499,504,508,525,535,544,562,564,599,605,613,622,630,647,650,662,668,673,677,701,705,708,716,718,735,781,785,793,801,803,806,836,838,846,856,857,880,882,902,930,931,933,941,960,977,982,986,1035,1057,1061,1078,1085,1091,1115,1145,1166,1170,1171,1198,1199,1214,1219,1221,12…	ACTN1,ADM,AHCY,ALCAM,ANKRD1,ARL14EP,ATP1B3,BCAT1,BUB3,CACYBP,CBX5,CCNB1,CCNG1,CD44,CD93,CDKN1A,CENPV,CHD1,CHRNB1,CISD1,CTGF,DHRS7B,DIAPH3,DUSP6,EED,EFNB2,FAM101B,FAM134B,FAM136A,FAM162A,FAM171A1,FLNB,GADD45A,GDNF,GJA1,GPC1,GSG2,GSR,H2AFZ,HBEGF,HELLS,HIVEP2,HPRT1,IER3,IGF2,ITGA6,KCNK2,KIAA1524,KIF20A,KLF4,KPNB1,LBR,LIG1,MAK16,MAPK6,MCM5,MCM7,MDM2,MRPS22,MRPS25,MSN,MYC,MYCN,NUBP1,NUP50,NXT1,ODC1,OT…	ABCE1,ABCF2,ACKR3,ACOT7,ACOT9,ACSL5,ACTA1,ACTG2,ACTL6A,ACTN1,ACTN4,ADAM12,ADM,ADORA2B,AHCY,AIMP2,ALCAM,ALYREF,ANAPC15,ANKRD1,ANLN,ANXA3,AQP1,ARL14EP,ARL4C,ASF1B,ASNA1,ASPM,ATP1B3,AURKA,AURKB,BANF1,BAX,BCAT1,BDNF,BIRC5,BNC1,BOP1,BPGM,BRCA1,BUB1,BUB3,BYSL,C3orf58,C4orf27,C4orf3,C6orf136,CACYBP,CAPG,CASP3,CBX1,CBX5,CCL2,CCL7,CCNA2,CCNB1,CCND1,CCNF,CCNG1,CCT3,CCT6A,CCT7,CD151,CD44,CD93,CDC20,CDC25C,C…
MSigDB Perturbation	MEISSNER_BRAIN_HCP_WITH_H3K4ME3_AND_H3K27ME3	Genes with high-CpG-density promoters (HCP) bearing histone H3 dimethylation at K4 (H3K4me2) and trimethylation at K27 (H3K27me3) in brain.	113	0.000173555	0.583837	0.0051667	1.18291	334.769	396	10216	0.173077	0.0387627	225	1024	1039	4,5,7,12,15,16,29,37,41,43,47,48,49,60,61,62,67,79,82,84,101,104,105,109,111,112,113,114,115,116,117,119,125,126,127,128,133,135,143,145,148,149,153,154,155,156,157,170,174,177,182,186,189,203,204,207,210,211,213,222,227,231,233,244,245,251,274,284,294,301,305,315,316,320,321,325,332,337,348,351,356,360,364,372,386,396,399,401,403,409,412,419,420,425,429,444,460,465,476,482,484,485,487,493,501,50…	4,5,7,12,15,16,29,37,41,43,47,48,49,60,61,62,67,79,82,84,101,104,105,109,111,112,113,114,115,116,117,119,125,126,127,128,133,135,143,145,148,149,153,154,155,156,157,170,174,177,182,186,189,203,204,207,210,211,213,222,227,231,233,244,245,251,274,284,294,301,305,315,316,320,321,325,332,337,348,351,356,360,364,372,386,396,399,401,403,409,412,419,420,425,429,444,460,465,476,482,484,485,487,493,501,50…
0647,40650,40653,40655,40668,40669,40678,40688,40693,40694,40698,40706,40707,40719,40720,40727,40728,40740,40742,40751,40777,40778,40779,40781,40784,40788,40795,40797,40811,40819,40820,40822,40828,40837,40838,40843,40853,40857,40863,40864,40873,40875,40882,40885,40887,40888,40901,40902,40903,40905,40907,40916,40918,40920,40921,40923,40931,40937,40943,40962,40970,40977,40984,40993,40994,40995,4100…	A4GALT,ADORA2A,ALS2CL,ANO1,ANTXR2,AP1S3,ARX,ATF3,ATOH8,ATP10A,ATP12A,B3GNT5,BAG3,BARX2,BCAR3,BCL2L11,BHLHA9,BHLHE22,BMP2,C10orf54,CASZ1,CD83,CD97,CDC14A,CDH13,CDH22,CERKL,CLDN11,CLIC5,CLIC6,CMTM7,COL15A1,COL19A1,COL5A1,CRISPLD2,CTGF,CXCL12,DAPK2,DDIT4L,DHRS3,DIRAS2,DISC1,DLX2,DMRT2,DMRTA2,DOCK5,DPP10,DPP6,DUSP10,DUSP4,DYSF,EBF1,EBF2,EFNA5,ELFN1,EMP2,EN1,ENSG00000143674,EPAS1,EPB41L1,ESRRB,ESYT3,F…	A4GALT,ABAT,ABHD15,ABLIM3,ABT1,ABTB2,ACE,ACER2,ACSF2,ADA,ADAMTS15,ADAMTS17,ADAMTS18,ADAMTS19,ADAMTS2,ADAMTS5,ADAMTS7,ADAMTS8,ADAMTSL5,ADAP2,ADCY7,ADORA2A,ADORA2B,ADRA1B,ADRA1D,ADRA2A,ADRA2B,ADRA2C,ADRB2,AFAP1L1,AFAP1L2,AGPAT2,AHNAK,AIF1L,AJUBA,ALDH1A2,ALOX12,ALPL,ALS2CL,AMIGO2,ANLN,ANO1,ANO5,ANTXR2,ANXA2,AP1M2,AP1S3,AREG,AREGB,ARG2,ARHGAP10,ARHGAP11A,ARHGAP27,ARHGAP28,ARHGAP29,ARHGEF17,ARHGEF26,A…
MSigDB Perturbation	HARRIS_HYPOXIA	Genes known to be induced by hypoxia	114	0.000182742	0.614743	0.00539248	1.74173	27.5588	48	841	0.020979	0.0570749	21	81	81	7,21,66,86,94,216,307,328,351,410,470,473,535,572,613,643,650,659,742,778,780,782,787,1070,1106,1221,1263,1350,1514,1575,1672,1731,1985,1990,2011,2028,2032,2033,2098,2100,2122,2259,2278,2386,2467,2486,2555,2707	7,21,66,86,94,216,307,328,351,410,470,473,519,535,572,613,643,650,659,742,778,780,782,787,1070,1106,1221,1222,1263,1350,1513,1514,1575,1672,1731,1771,1985,1990,2011,2028,2032,2033,2098,2100,2122,2150,2154,2259,2278,2386,2465,2467,2486,2555,2707,2771,2939,2998,3210,3238,3266,3333,3539,3563,3627,3629,3795,3832,3873,3930,4004,4055,4057,4178,4181,4270,4286,4303,4388,4442,4472,4516,4585,4929,4974,5042…	ADM,AK3,ANGPT2,BHLHE40,BNIP3L,CDKN1A,COL5A1,CP,EDN1,ENO1,EPAS1,FGF3,HDAC9,HIF1A,HK1,IGF2,SLC2A1,SLC2A3,TGFA,TGM2,VEGFA	ADM,AK3,ALDOA,ANGPT2,APEX1,BHLHE40,BIK,BNIP3,BNIP3L,CA12,CA9,CCL2,CCNG2,CD99,CDKN1A,CDKN1B,COL5A1,CP,DDIT3,EDN1,EDN2,ENO1,ENPEP,EPAS1,EPO,F3,FGF3,FLT1,FOS,FTL,GAPDH,HDAC9,HGF,HIF1A,HK1,HK2,HMOX1,IGF2,IGFBP1,IGFBP2,IGFBP3,IL6,IL8,JUN,L1CAM,LDHA,LRP8,MIF,MMP13,NFKB1,P4HA1,PDGFB,PFKL,PFKP,PGF,PGK1,PKM,PLAUR,PRPS1,PTGS2,RP1,SAT1,SLC2A1,SLC2A3,SPP1,STC1,TAGLN,TEK,TF,TFF3,TFRC,TGFA,TGFB1,TGFB3,TGM2,TH,…
MSigDB Perturbation	WENDT_COHESIN_TARGETS_UP	Cohesin targets identified by ChIP-chip which were up-regulated after knockdown of CTCF and RAD21 [GeneID=10664;5885] by RNAi.	115	0.000189983	0.639104	0.00555742	2.0052	15.9585	32	487	0.013986	0.0657084	12	35	35	1.43205e+119	143,205,394,474,688,745,786,799,823,893,1137,1164,1261,1348,1492,1507,1674,1682,1889,1927,1970,2016,2047,2132,2146,2262,2311,2325,2379,2429,2471,2481,2604,2672,2698,2735,2753,2771,2948,3129,3219,3404,3410,3696,3726,3765,3839,3850,3993,4040,4160,4211,4366,4557,4686,4755,4920,5331,5515,5618,5686,5835,5920,6171,6338,6504,6632,6730,7150,7381,7423,7904,7913,7962,8082,8458,8576,8720,8918,8940,9086,9177…	AGTPBP1,ALCAM,ATG5,FRA10AC1,FUT8,MKLN1,PLEKHA5,RND3,SEPT7,TLK2,TOP2B,USP25	AGTPBP1,AKAP2,ALCAM,ASPH,ATG5,CAMSAP2,CAST,ELF2,EXOC6,FRA10AC1,FUT8,GOLGA8A,GOLGA8B,JMJD1C,MEF2A,MKLN1,OXR1,PALM2-AKAP2,PFDN4,PIK3R3,PLEKHA5,POLR2M,PTK2,REEP3,RND3,SEPT7,SREK1,STK3,TLK2,TNPO1,TOP2B,TRMT11,USP25,VTA1,YOD1
MSigDB Perturbation	OKUMURA_INFLAMMATORY_RESPONSE_LPS	Genes up-regulated in mast cells (MC) after stimulation with a bacterial lipopolysaccharide (LPS).	116	0.000194352	0.653798	0.00563619	1.46517	63.4736	93	1937	0.0406468	0.0480124	51	177	179	11,37,49,61,110,136,140,153,169,222,275,277,329,371,401,420,467,499,504,522,544,547,561,562,584,588,602,619,620,664,677,718,721,733,750,766,843,880,921,966,1022,1035,1040,1061,1077,1143,1159,1248,1270,1286,1290,1314,1327,1372,1379,1412,1431,1492,1525,1536,1539,1563,1583,1596,1626,1694,1697,1756,1802,1811,1860,1898,1910,2063,2088,2090,2107,2157,2168,2182,2294,2307,2343,2376,2392,2449,2452,2477,248…	11,37,49,61,110,136,140,153,169,222,275,277,329,371,401,420,467,499,504,522,544,547,561,562,584,588,602,619,620,664,677,718,721,733,750,766,843,862,880,921,966,1022,1035,1040,1060,1061,1077,1143,1159,1235,1248,1270,1286,1290,1314,1327,1372,1379,1412,1431,1449,1492,1525,1536,1539,1543,1563,1583,1596,1626,1694,1697,1756,1780,1802,1811,1860,1898,1910,2063,2088,2090,2107,2150,2157,2168,2182,2294,2307…	ACSL1,ADIPOR2,ALCAM,APITD1-CORT,BAALC,BCL2L11,C1orf61,CA1,CCL5,CITED2,CYB5A,DHRS2,DSE,ETV5,FOXC1,GALNT12,GSAP,KCTD3,MAOA,MARCKS,MARCKSL1,MAST4,MTF2,NCOA3,PAM,PDZD2,PHLDA1,PILRB,PPAP2B,PPIF,PRSS22,PTPRK,RAB38,RAB9A,RAPGEF6,RASGRP1,REL,RUNX1,SCD5,SLC4A7,SMAD3,SOX4,SPHK1,TCF20,TFDP2,THBS1,TMEM123,TNFAIP3,TNFSF4,TRAF3,VDR	ABCE1,ACN9,ACSL1,ACTA2,ADAP1,ADIPOR2,AGT,AKT3,ALCAM,ALG9,APITD1-CORT,APOL2,ARG2,ATF5,ATP11A,BAALC,BCL2L11,BIRC3,C1orf61,CA1,CA12,CCDC33,CCHCR1,CCL1,CCL5,CCL8,CCNB2,CCR7,CD200,CEBPD,CEP135,CHST1,CHST7,CITED2,CLGN,CLIP1,CYB5A,DHRS2,DNAJC16,DNAJC6,DOCK10,DSE,EIF1AX,ETV5,FA2H,FAM129A,FCGR2A,FKBP1A,FOXC1,FOXD1,FOXO4,FSCN1,FZD3,FZD6,GALNT12,GCKR,GDF11,GSAP,GULP1,HAMP,IGFBP5,IL18RAP,IL1RL1,IL27RA,IL5,IL…
MSigDB Perturbation	DUTERTRE_ESTRADIOL_RESPONSE_24HR_DN	Genes down-regulated in MCF7 cells (breast cancer) at 24 h of estradiol [PubChemID=5757] treatment.	117	0.000196904	0.662386	0.00566142	1.2587	181.934	229	5552	0.100087	0.0412464	134	488	498	12,20,33,45,55,72,75,96,112,116,119,126,132,136,144,146,148,151,169,172,193,195,205,214,228,239,241,245,252,258,268,287,290,299,318,349,364,367,371,375,380,386,403,422,426,440,457,461,462,467,471,482,484,493,508,509,540,558,564,567,572,581,584,603,604,608,615,620,622,628,630,634,635,654,656,662,675,676,721,722,733,738,754,764,767,793,797,825,827,866,912,936,978,1002,1003,1008,1012,1052,1095,1113,…	12,20,33,45,55,72,75,96,112,116,119,126,132,136,144,146,148,151,169,172,193,195,205,214,228,239,241,245,252,258,268,287,290,299,318,349,364,367,371,375,379,380,386,403,422,426,440,457,461,462,467,471,482,484,493,508,509,540,558,564,567,572,581,584,603,604,608,615,620,622,628,630,634,635,637,654,656,662,665,675,676,721,722,724,733,738,754,764,767,793,797,825,826,827,830,862,866,912,926,936,960,978…	ACAA2,ACVR1,AHR,ALCAM,ANK3,ARAP2,ARHGAP12,ARL15,BAZ2B,BCAP29,BCKDHB,BOK,CD55,CDC42BPA,CDKN1A,CDS1,CDYL2,CITED2,CORO2A,CRISPLD2,CSRP1,CTGF,DCLK1,DDIT4,DIO2,DKK1,DMRTA1,DNAJC15,DNAJC22,DRAM1,DSE,DUSP10,DUSP4,DZIP3,EDN1,EFNB2,ELF3,ENTPD3,EPAS1,EPB41L2,EPHA4,FAM49B,FNBP1L,FZD2,FZD7,GABBR2,GADD45A,GDF15,GLIPR2,GPR126,GPR98,GRAMD1A,GRAMD3,GSAP,HIVEP2,HPS3,ITGB8,KDM5B,KIAA0513,KLF3,KLF5,KLF6,KLHL5,KRT80…	AASS,ABCA1,ABCC3,ABCC5,ABCG1,ABCG2,ABHD4,ABLIM3,ACAA2,ACHE,ACKR3,ACOX3,ACSL3,ACVR1,ADAM9,AHNAK2,AHR,AKIRIN2,ALCAM,ALDH1A3,ANK3,ANO6,ANXA2,ANXA3,APPL2,AQP3,ARAP2,ARHGAP12,ARHGAP5,ARID4B,ARID5B,ARL15,ARL4C,ATP10D,ATP1B1,ATP2B1,ATP6V0A4,ATP8A1,B4GALT4,BAK1,BASP1,BAZ2B,BCAP29,BCAS1,BCKDHB,BEX4,BMF,BMP7,BOK,BTG2,CAB39,CALCOCO1,CALD1,CAMK2N1,CAPN13,CAST,CBLB,CCNDBP1,CCNG2,CD46,CD47,CD55,CDC42BPA,CDH2,C…
MSigDB Perturbation	BROWNE_HCMV_INFECTION_16HR_DN	Genes down-regulated in primary fibroblast cell culture after infection with HCMV (AD169 strain) at 16 h time point that were not down-regulated at the previous time point, 14 h.	118	0.000197109	0.663074	0.00561927	1.71442	29.1644	50	890	0.0218531	0.0561798	25	83	85	15,69,110,113,128,145,174,210,325,332,401,419,471,499,501,504,562,677,719,781,953,1011,1031,1061,1120,1130,1154,1237,1276,1431,1576,1626,1648,1706,1728,1868,1898,1910,1957,2184,2200,2202,2214,2245,2250,2267,2543,2603,2648,2675	15,69,110,113,128,145,174,210,325,332,401,419,471,499,501,504,562,677,719,781,862,953,1011,1031,1061,1120,1130,1141,1154,1237,1276,1431,1475,1576,1626,1648,1706,1728,1786,1868,1898,1910,1937,1957,1958,2184,2200,2202,2212,2214,2245,2250,2267,2508,2543,2603,2648,2675,2774,2929,3030,3090,3091,3102,3113,3286,3321,3609,3619,3623,3661,3710,3787,3798,3941,3968,4054,4087,4171,4251,4327,4372,4494,4498,454…	ACAA2,ACADVL,ADH1B,ANKRD1,ANPEP,ATP2B4,CACNA1E,CHN1,DCLK1,DHRS3,FGF2,GDF10,GJA1,ITGAM,MACF1,METTL7A,NAAA,PBX1,RBPMS,RHOBTB3,RUNX1,SVIL,THBS1,WNT5A,ZFP36L2	ACAA2,ACADVL,ACY1,ADAMTS2,ADH1B,ADH5,ADIRF,AKR1C3,ANKRD1,ANPEP,AP4S1,APOBEC3C,ATP13A3,ATP2B4,C14orf132,CACNA1E,CAMK1G,CHN1,COG4,COL13A1,COL1A1,COL1A2,CSNK1G2,CXCL9,CYP3A4,DCLK1,DHRS3,DIP2C,DNASE1L1,FABP3,FBXL2,FBXO21,FGF2,FILIP1L,GDF10,GFAP,GJA1,ID2,IFT88,ITGAM,LMNA,MACF1,MAGI2,MAP2K6,METTL7A,MPG,MT1H,MVD,MXD4,NAAA,NDP,NR1H3,NRP1,PBX1,PDCD4,PDLIM7,PLEC,POLD2,PTX3,RBPMS,RHOBTB3,ROR2,RUNX1,SEMA3A,S…
MSigDB Perturbation	ZWANG_EGF_INTERVAL_DN	Genes repressed in the time interval between two pulses of EGF [GeneID =1950] in 184A1 cells (mammary epithelium).	119	0.000197255	0.663566	0.00557619	1.48204	59.3775	88	1812	0.0384615	0.0485651	43	186	195	4,18,31,96,131,136,151,152,172,184,185,199,217,230,248,253,271,298,347,364,414,417,434,454,458,510,586,604,625,635,646,654,676,707,733,736,754,764,866,871,886,889,936,1113,1136,1190,1233,1241,1246,1272,1305,1306,1312,1326,1361,1374,1378,1382,1386,1398,1401,1426,1441,1521,1577,1592,1636,1743,1922,1961,1965,2073,2125,2165,2194,2216,2244,2263,2280,2297,2368,2385,2469,2490,2527,2547,2561,2718	4,18,31,96,131,136,151,152,172,184,185,199,217,230,248,253,271,298,347,364,414,417,434,454,458,510,586,604,625,635,646,654,676,707,733,736,754,764,830,852,866,871,886,889,936,1113,1136,1190,1233,1241,1246,1272,1305,1306,1312,1326,1361,1374,1378,1382,1386,1398,1401,1409,1426,1441,1521,1577,1578,1592,1636,1656,1743,1827,1832,1837,1922,1961,1965,2004,2024,2073,2125,2165,2194,2216,2232,2244,2263,2280…	ADCK3,AKAP13,BCAR3,BTG1,CASZ1,CEBPB,CORO6,DAAM1,DKK1,DUSP10,EFCAB4B,ELF3,EMP2,ETFDH,FNBP1L,GABRB1,HOXA1,HOXA5,IRF1,IRF2BPL,JMY,KAT6B,KDM5B,KLF3,LY6E,MADD,MATN2,MXI1,PAPPA,PHACTR3,PIK3R1,PLD1,RARRES3,RBMS1,RPS6KA5,SAMSN1,SERPINE1,SNAI2,SOX4,SYT8,TFCP2L1,TMEM101,ZNF608	ABHD8,ABTB2,ACAP1,ADCK3,AGFG2,AHNAK2,AKAP13,AKAP9,ANKRD11,AP4M1,AR,ARHGAP24,ARHGEF37,ARRDC2,ARSA,ATOH7,BCAR3,BCL9,BMP4,BTG1,C1orf210,CA2,CA5B,CASZ1,CCDC181,CCNL1,CD248,CDC42BPG,CDC42EP4,CDIP1,CEBPB,CEP68,CHRNA7,CITED4,CLDN7,CORO6,CPEB3,CXCR2,CXXC5,CYB5D2,DAAM1,DAB2IP,DAPK1,DAPK3,DKK1,DUSP10,EFCAB4B,EHF,EIF4A1,ELF3,EMP2,ETFDH,FAM134C,FAM63A,FBXO2,FGD4,FNBP1L,FTHL17,FTMT,FYB,GABBR1,GABRB1,GIGYF1,GL…
MSigDB Perturbation	FORTSCHEGGER_PHF8_TARGETS_UP	Genes up-regulated in HeLa cells (cervical carcinoma) upon knockdown of PHF8 [GeneID=23133] by RNAi.	120	0.00019938	0.670715	0.00558929	1.41519	77.7282	110	2372	0.0480769	0.0463744	64	250	253	15,27,30,32,61,94,109,113,128,145,174,184,210,218,228,235,248,259,261,290,328,332,364,386,401,415,419,426,467,474,479,482,509,533,545,562,563,580,581,620,630,654,693,742,785,793,801,823,914,936,942,980,990,1006,1016,1122,1137,1145,1161,1171,1337,1344,1350,1351,1354,1363,1371,1385,1431,1458,1478,1561,1576,1600,1626,1633,1823,1847,1898,1913,1939,2086,2098,2100,2104,2122,2191,2206,2219,2271,2297,234…	15,27,30,32,61,94,109,113,128,145,174,184,210,218,228,235,248,259,261,290,328,332,364,386,401,415,419,426,467,474,479,482,509,533,545,562,563,580,581,620,630,654,693,742,785,793,801,823,914,936,942,980,990,1006,1016,1122,1137,1145,1161,1171,1268,1337,1344,1350,1351,1354,1363,1371,1385,1417,1431,1446,1458,1478,1561,1576,1600,1626,1633,1678,1689,1818,1823,1847,1898,1913,1939,2059,2086,2098,2100,210…	ANKRD32,ANKRD46,BCL2L11,BMP2,C8orf22,CALML4,CBX5,CCDC6,CENPV,CHAC1,CITED2,CMTM7,CTGF,CTSC,DDIT4,DHRS3,FAM171A1,FBXW7,FNBP1L,FZD7,GCLC,GLP2R,HINT3,HLX,HOXA5,IGF1R,INSR,ITPR1,JMY,KPNB1,KRTDAP,LMO4,LYRM7,MAN1A1,MAP7,MLXIPL,MND1,MOCS2,MRPL42,NCOA7,NDC1,NEK10,NMNAT1,NR2F1,NSRP1,PDHX,RASSF9,RELL1,RNLS,RPIA,SESN2,SET,SETD4,SLC2A3,STOX2,STX6,SYNCRIP,TGFBR2,TMEM116,TOP2B,TSPAN3,VAV3,VEGFA,XIAP	A2M,ACPP,ACVR2B,ADAMTS1,AKR1C1,ALDH1L2,ANKRD32,ANKRD46,ARHGAP28,ARL6IP1,ASMTL,ASNS,ATF4,BCL2L11,BET1,BID,BMP2,BMP6,BNIP2,C6orf62,C8orf22,C9orf9,CALML4,CALU,CBX5,CBX8,CCDC6,CCDC77,CCNY,CCNYL1,CDC26,CDC37L1,CDH24,CDRT1,CENPV,CERK,CHAC1,CHML,CITED2,CMTM7,CNOT6,CRB1,CTAG1A,CTAG1B,CTGF,CTSC,DCAF17,DCAF4,DCBLD1,DDAH1,DDIT4,DDX3X,DHRS3,DNAJB4,DPCD,DPY19L4,DUSP16,DUSP2,E2F5,ECE1,ECM2,EFNA1,EIF2AK4,EIF5,E…
MSigDB Perturbation	MARSON_FOXP3_TARGETS_UP	Genes up-regulated by FOXP3 [GeneID=50943] in both ex vivo and hybridoma cells.	121	0.000201755	0.678702	0.00560911	1.85671	21.005	39	641	0.0170455	0.0608424	16	59	63	18,25,226,253,279,290,328,423,509,543,602,605,705,856,957,1136,1164,1324,1433,1583,1592,1621,1797,1867,1916,1927,1939,1997,2098,2320,2325,2356,2429,2538,2539,2590,2621,2651,2735	18,25,226,253,279,290,328,423,509,543,602,605,705,856,957,1094,1136,1164,1324,1433,1583,1592,1621,1797,1867,1916,1927,1939,1997,2098,2106,2320,2325,2356,2429,2538,2539,2590,2621,2651,2735,2853,2906,3007,3103,3120,3159,3208,3335,3720,3746,3791,3832,3857,3972,3979,4060,4078,4137,4255,4441,4467,4518,4548,4822,4840,4946,4998,5076,5085,5142,5331,5580,5600,5623,5743,5818,5846,5949,5965,6016,6017,6048,6…	CD44,CYB5A,DDIT4,DUSP4,GM2A,HNRNPLL,IRF8,MAPRE2,MYH9,NRIP1,RCSD1,RGS16,SAMHD1,SLC2A3,SNX18,TNK2	ARHGAP9,BASP1,CAPG,CD2,CD44,CD81,CELF2,CORO1A,CRIP1,CSNK1D,CYB5A,DDIT4,DUSP4,ECM1,EPHX1,ETS1,GM2A,HADH,HNRNPLL,IRF8,ITGAV,ITM2C,LRRC8C,MAPRE2,MBNL2,MCL1,MKNK2,MYH9,MYO1C,NCF4,NKG7,NRIP1,OSBPL9,PDLIM2,PDZK1IP1,PLIN2,PNP,PPM1B,PTPLAD1,RAC2,RAMP1,RCSD1,RGS16,S100A10,S100A6,SAMHD1,SERINC3,SH3BGRL,SLC2A3,SLC9A3R1,SNX18,STK10,SWAP70,TGFBR1,TIAM1,TNK2,VIM,XCL1,ZNF260
MSigDB Perturbation	LU_IL4_SIGNALING	Genes up-regulated in peripheral B lymphocytes after incubation with IL4 [GeneID=3565] for 4 h.	122	0.000213101	0.71687	0.00587598	1.6618	33.0967	55	1010	0.0240385	0.0544555	28	93	94	18,37,89,155,222,228,253,267,350,364,434,518,533,543,577,630,666,742,766,793,803,903,1022,1064,1077,1136,1143,1201,1212,1230,1263,1336,1344,1360,1447,1478,1522,1548,1556,1574,1592,1596,1913,2100,2107,2122,2125,2295,2297,2477,2523,2611,2674,2716,2718	18,37,89,155,222,228,253,267,350,364,434,518,519,533,543,577,630,666,742,766,793,803,903,926,1022,1060,1064,1077,1136,1143,1201,1212,1230,1263,1336,1344,1360,1447,1478,1522,1548,1556,1574,1592,1596,1624,1771,1871,1913,1923,1967,2089,2100,2107,2122,2125,2295,2297,2330,2477,2523,2611,2638,2674,2716,2718,2765,2766,2771,2847,2857,3050,3051,3061,3063,3174,3246,3417,3505,3523,3596,3613,3734,3801,3845,3…	ARAP2,BCL6,BHLHE40,CCL5,CMTM6,CTGF,CTSD,EBF1,EVI2A,FCER2,GNAS,GNG2,GSR,HLX,HOXC4,IRF8,MAP3K5,MARCKSL1,NCOA3,PDE7A,PKN2,RASGRP3,RRAGD,SAMSN1,SEL1L3,SLA,SMARCA2,TNFAIP3	AKAP2,ALOX5,APPL2,ARAP2,ARPC5,ATPAF1,ATXN1,BATF,BCKDK,BCL6,BHLHE40,CCL4,CCL5,CD69,CD79B,CD86,CFLAR,CISH,CLTC,CMTM6,CNTN6,CTGF,CTSD,EBF1,EGR1,EIF4G1,EVI2A,FCER2,FGL2,GCSAM,GNAS,GNG2,GSR,HLA-DRB5,HLX,HOXC4,HUWE1,IL2RA,IL4R,IL6,IRF8,KLF13,KMO,LY75-CD302,MAL,MAP3K5,MARCKSL1,METTL14,MGLL,MRPS15,MTMR9,NCF2,NCOA3,NEK6,NFIL3,NFKBIZ,PALM2-AKAP2,PDE7A,PEG10,PHF20L1,PKN2,PMAIP1,PPP2CA,PPP6C,QSOX1,RASGRP3,RG…
MSigDB Perturbation	KERLEY_RESPONSE_TO_CISPLATIN_DN	Genes genes down-regulated in NT2/D1 cells (embryonal carcinoma) in response to treatment with cisplatin [PubChem=2767].	123	0.000215005	0.723278	0.00588031	3.64873	3.01475	11	92	0.00480769	0.119565	3	5	5	6,17,42,265,447,481,715,744,1116,1134,1262	6,17,42,265,447,481,715,744,1116,1134,1262,3152,3819,5841,5853,7488,7950,8157,8524,9376,9437,10040,10716,10995,12081,12880,13420,14736,16074,16097,18335,20065,20681,21050,21790,22982,26762,27343,31700,32221,32503,32738,33618,34054,34727,35836,36196,36236,37404,37842,39291,39379,39648,40144,40185,40329,40506,40540,41010,41404,42204,42844,43098,44006,44016,44084,44153,44203,47618,47684,48180,48290,…	CYP26A1,HMGCS1,MYC	CYP26A1,HESX1,HMGCS1,LPIN1,MYC
MSigDB Perturbation	XU_GH1_AUTOCRINE_TARGETS_DN	Genes down-regulated in MFCF-7 cells (breast cancer) upon stable autocrine expression of HG1 [GeneID=2688].	124	0.000216408	0.727998	0.00587095	1.53726	48.1377	74	1469	0.0323427	0.0503744	35	128	133	37,54,75,110,111,132,140,151,177,180,222,239,241,325,422,440,451,499,504,508,564,570,622,635,677,705,729,753,766,807,838,843,854,880,897,952,984,1022,1077,1108,1113,1125,1179,1282,1364,1372,1470,1536,1550,1555,1593,1621,1666,1729,1743,1811,1842,1845,1910,1990,2090,2168,2194,2229,2344,2376,2414,2487,2490,2533,2542,2588,2590,2596	37,54,75,110,111,132,140,151,177,180,222,239,241,325,422,440,451,499,504,508,564,570,622,635,677,705,724,729,753,766,807,814,838,843,854,880,897,925,952,984,1005,1022,1063,1072,1077,1107,1108,1113,1125,1141,1179,1250,1282,1340,1364,1372,1463,1470,1513,1532,1536,1550,1555,1593,1621,1666,1729,1743,1811,1842,1845,1910,1958,1990,2090,2168,2194,2229,2269,2344,2376,2414,2487,2488,2490,2533,2542,2548,25…	ADIPOR2,AFF1,C10orf76,CD44,CDC42BPA,CIT,EFNA5,EFNB2,EXOC3,FAM134B,GDAP1,HPSE,JAK1,KCNK2,KDM5B,KRT80,MCPH1,MPRIP,NPHS2,NUP50,PREX1,PRLR,PTPRK,RBPMS,REL,RHOQ,SEMA3C,SLC24A3,SLC39A10,SULF1,SULF2,THBS1,TMEM164,UBL3,UNC5C	ADCY1,ADIPOR2,AFF1,AGR2,ARID5B,B4GALT1,BAMBI,C10orf76,CA2,CACNG4,CD44,CDC42BPA,CHD6,CIT,COL12A1,COQ4,CTNND2,CUX1,DBN1,DDX39A,DNAJC1,DSCAM,DYRK1B,EFNA5,EFNB2,EIF5,ELOVL2,ESPN,EXOC3,FAM129B,FAM134B,FOXP1,FTSJD1,GDAP1,GDF3,GP9,GPC3,GPR180,GPX4,GSTM3,HDLBP,HOOK1,HPSE,HSD17B4,HSPA1B,HSPH1,IGFBP4,IPO7,ISOC1,JAK1,KCNK2,KDM5B,KIAA0101,KRT80,LAMA5,LXN,MAP3K1,MCF2L,MCPH1,MPRIP,NAALADL2,NAT1,NBEA,NDUFB8,NET…
MSigDB Perturbation	WIELAND_UP_BY_HBV_INFECTION	Genes induced in the liver during hepatitis B (HBV) viral clearance in chimpanzees.	125	0.000221479	0.745056	0.00596045	1.84806	21.1033	39	644	0.0170455	0.060559	22	100	100	45,84,263,270,278,354,367,457,514,560,652,660,709,889,917,951,961,971,1288,1435,1527,1570,1596,1598,1779,1869,1997,2015,2065,2079,2186,2343,2366,2430,2579,2654,2659,2670,2763	45,84,263,270,278,354,367,457,514,560,652,660,709,889,917,951,961,971,1288,1435,1527,1570,1596,1598,1779,1869,1997,2015,2056,2065,2079,2186,2310,2343,2364,2366,2369,2430,2517,2579,2654,2659,2670,2763,2789,2876,2900,2904,2912,3007,3099,3105,3108,3371,3407,3494,3655,3685,3722,3736,3746,3789,3829,3838,3841,3956,3965,4148,4187,4269,4357,4482,4519,4522,4527,4624,4837,4850,4981,5103,5144,5296,5352,5358…	CCL5,CD38,CD53,CD83,CECR1,COTL1,CTSB,CTSC,DRAM1,EMR1,FCGR1B,GM2A,HLA-DMB,PARP12,PIK3CD,PPT1,RAB20,RARRES3,SLC7A7,SP110,SRGN,UBE2L6	APOL3,ARHGDIB,AURKA,B2M,C1QB,C1orf54,C3AR1,CCL5,CD38,CD3D,CD48,CD53,CD5L,CD68,CD74,CD83,CECR1,CFL1,COTL1,CTSB,CTSC,CXCL10,CXCL11,CXCL9,CXCR4,DENND2D,DRAM1,EMR1,FCER1G,FCGR1A,FCGR1B,FGL2,GBP1,GBP2,GIMAP5,GM2A,GPNMB,GZMA,GZMK,HLA-A,HLA-B,HLA-C,HLA-DMA,HLA-DMB,HLA-DPA1,HLA-DPB1,HLA-DQB1,HLA-DRA,HLA-E,HLA-F,IFI16,IFI27,IFI30,IGSF6,IL10RA,ISG20,KPNA2,LAP3,LAPTM5,LGALS3,LPXN,LYZ,MCM6,PARP12,PBK,PIK3CD,…
MSigDB Perturbation	CERVERA_SDHB_TARGETS_1_UP	Genes turned on in Hep3B cells (hepatocellular carcinoma, HCC) upon knockdown of SDHB [GeneID=6390] by RNAi.	126	0.000231652	0.779277	0.00618474	1.71284	28.6074	49	873	0.0214161	0.0561283	29	106	109	6,17,42,74,84,194,265,270,385,422,426,447,547,589,591,592,660,693,715,744,897,921,940,951,955,961,1053,1061,1086,1134,1163,1262,1386,1519,1566,1655,1797,1869,2021,2028,2065,2270,2280,2458,2570,2579,2654,2741,2742	6,17,42,74,84,194,265,270,385,422,426,447,513,547,589,591,592,660,693,715,724,744,830,897,921,940,951,955,961,1005,1053,1061,1086,1094,1117,1134,1163,1175,1262,1302,1386,1417,1519,1566,1655,1784,1797,1869,2017,2021,2028,2065,2106,2270,2280,2458,2570,2579,2654,2741,2742,2766,3061,3097,3129,3152,3321,3465,3467,3623,3726,3979,4187,4334,4353,4357,4407,4441,4491,4522,4564,4615,4638,4653,4699,4700,4866…	ARHGAP23,C2CD4A,CLIC6,DUSP4,DYRK4,EDN1,EMP2,GALNT16,HPSE,IL18,KRT17,KRT80,LEFTY2,LOXL2,MAP1B,MYOF,NEURL1B,OLFML2A,PIK3CD,PLXDC2,RAB20,RBP7,SCD5,SCN4B,SOCS2,SUSD4,TANC2,TNNI2,VDR	ABLIM2,ACKR3,ANXA13,APLP1,AQP1,ARHGAP23,ASCL1,ATP6V1C2,BAAT,C2CD4A,CACNB3,CAND2,CCDC109B,CLIC6,COL1A1,DNAAF3,DUSP4,DYRK4,EDN1,EMP2,ENSG00000163075,EPS8L1,FEZ1,FHL2,FSTL1,GALNT16,GALR2,GOLM1,GPR68,GPX8,HPSE,HRG,HTRA1,IFIT2,IGFBP2,IL18,INHBA,ITGB6,ITIH5,JAM2,KIF3C,KRT17,KRT80,LAMC2,LEFTY2,LHX2,LIPH,LMLN,LONRF2,LOXL2,LYPD1,LYPD6B,MAP1B,MEGF6,MFAP4,MGARP,MYOF,NEURL1B,NOD2,OLFML2A,PACSIN1,PCSK5,PGM2L1…
MSigDB Perturbation	KOBAYASHI_RESPONSE_TO_ROMIDEPSIN	Genes up-regulated in MM-LH cells (malignant melanoma) after treatment with the HDAC inhibitor romidepsin (FK228) [PubChem=5352062].	127	0.000245262	0.825062	0.00649655	2.67414	6.35719	17	194	0.00743007	0.0876289	4	19	19	75,87,239,241,440,508,564,622,683,685,1123,1555,1605,1845,1999,2082,2085	75,87,239,241,440,508,564,622,683,685,1123,1555,1605,1845,1999,2082,2085,2353,3648,3819,3983,4348,4366,4696,4705,4752,5042,5206,5215,5605,5841,5853,6090,6316,6957,7319,8356,8438,8524,8929,9437,9534,10040,10097,10766,10859,12081,12251,12672,12880,13420,13459,13474,14016,14124,14264,14736,15158,15224,15587,15687,16074,16097,17369,17407,18335,18637,18774,19175,19720,19864,20130,20678,20681,21050,212…	ARL4D,EFNB2,MERTK,NGFR	ARL4D,DENND3,DNAJC27,EFNB2,ELOVL4,FABP6,FOS,GTF2B,IL8,KLHL7,LPIN1,MERTK,MICA,NGFR,PMEL,RAB3IP,RB1CC1,SYT11,TNFAIP6
MSigDB Perturbation	SASSON_RESPONSE_TO_FORSKOLIN_DN	Genes down-regulated in primary granulosa cells in response to forskolin [PubChem=47936].	128	0.000251714	0.846765	0.00661535	1.71723	27.952	48	853	0.020979	0.056272	21	88	88	15,41,110,113,122,128,144,145,174,210,270,332,347,419,461,499,504,527,625,677,848,978,1253,1260,1324,1328,1450,1518,1569,1576,1683,1719,1790,1852,1867,1886,1910,1915,2175,2320,2339,2356,2463,2579,2618,2644,2653,2654	15,41,110,113,122,128,144,145,174,210,270,332,347,419,461,499,504,527,625,677,848,978,1141,1253,1260,1324,1328,1450,1518,1569,1576,1587,1683,1719,1790,1852,1855,1867,1886,1891,1910,1915,1958,2175,2247,2320,2335,2339,2356,2463,2579,2594,2618,2644,2653,2654,2766,2772,2853,3053,3061,3077,3105,3286,3400,3411,3434,3471,3532,3683,3725,3798,3813,3825,3843,3861,4031,4087,4187,4216,4223,4267,4322,4338,447…	ACP5,ACTN1,ACTR2,ADCY9,AKAP12,ATP9A,CDK14,DHRS3,ITGB5,MAP4K4,MAPK6,MAPRE2,NPC2,PIK3CD,PLCL1,PPP2R5C,PTPN1,STK17A,STK25,THBS1,TRIB1	ABLIM1,ACP5,ACTA1,ACTA2,ACTB,ACTG2,ACTN1,ACTR2,ADCY7,ADCY9,AKAP12,ARHGAP1,ARHGAP35,ARL4C,ARL6IP5,ATP9A,AXL,CAP2,CAPZA1,CARD10,CASP4,CDK14,CDKN1C,CTNND1,CYFIP2,DAB2,DAPK1,DHRS3,DUSP14,DYRK3,ENSG00000005189,FLNC,GBP1,GDI2,GEM,GNB1,HSD17B1,ILK,ITGA3,ITGB5,KIDINS220,KRT18,MAP2K3,MAP4K4,MAPK6,MAPRE2,NPC2,PAWR,PDLIM3,PI4K2A,PIK3CD,PLCL1,PMAIP1,PPP2R5C,PPP3R1,PRKD1,PTPN1,PTPRE,PTPRF,RAB31,RAB33B,RAB5A,R…
MSigDB Perturbation	MOREAUX_MULTIPLE_MYELOMA_BY_TACI_UP	Up-regulated genes distinguishing in multiple myeloma (MM) samples with higher expression of TACI [GeneID=23495].	129	0.000269721	0.90734	0.00703365	1.36933	92.0155	126	2808	0.0550699	0.0448718	65	380	397	2,8,14,80,93,97,102,140,141,158,161,198,225,240,247,255,270,273,306,311,312,331,366,439,446,448,458,471,488,498,505,523,544,550,571,597,689,704,718,739,750,752,768,783,786,808,828,835,859,894,903,915,921,965,970,985,1015,1040,1067,1102,1123,1142,1146,1206,1211,1335,1339,1372,1403,1411,1422,1429,1447,1511,1516,1527,1536,1548,1553,1574,1577,1611,1680,1697,1745,1765,1802,1819,1892,1904,1987,1993,199…	2,8,14,80,93,97,102,140,141,158,161,198,225,240,247,255,270,273,306,311,312,331,366,439,446,448,458,471,488,498,505,523,544,550,571,597,689,704,718,727,730,739,750,752,768,783,786,808,828,835,859,894,903,915,921,949,965,970,985,1015,1040,1062,1067,1102,1123,1142,1146,1206,1211,1332,1335,1339,1372,1402,1403,1411,1422,1429,1447,1475,1504,1511,1516,1527,1536,1548,1553,1564,1574,1577,1611,1630,1645,1…	ACAA2,ADARB1,ARFRP1,ARHGAP44,ARL4D,ATP1B4,BCL2,C10orf11,C1orf61,CASZ1,CD80,CDK13,CEACAM1,CHRNA6,CLEC4M,DCBLD2,DDR1,EPB41L1,ETV1,EXPH5,FLRT2,FOXF2,GLP1R,GNAQ,GNG2,GNG4,GPR12,H3F3A,HLA-DMB,KCNIP1,LPAR1,LRFN5,MAST4,MRC2,MTSS1,NACC1,NOS1,NRP2,NTRK3,OLAH,PHLDA1,PIK3CD,PIK3R5,PKP2,PLA2G5,PLEKHA5,PLXNA1,POFUT2,PTGES,RABEP2,REL,RNF122,RPGRIP1,RPS6KA4,SEMA4G,SIGLEC7,SLC4A10,SLC6A13,SNCA,SNN,SYCP2,TCF20,TR…	AAK1,ABCG4,ACAA2,ACAD10,ACSL6,ACTA2,ACTB,ACTN2,ADAM11,ADARB1,ADCY10,AKAP7,AKR1C1,AKT2,ALDH3B1,ALPL,ALPPL2,AMELX,AMN,AMPH,ANKRD26,APAF1,API5,APOC2,ARFRP1,ARG1,ARHGAP44,ARHGEF15,ARHGEF16,ARL4D,ARRB1,ASH1L,ATP1B4,ATP2C2,AZGP1,B3GNT4,B4GALT1,BCL2,BEX1,BIK,BIRC7,BPIFA1,BTN1A1,BTNL3,C10orf11,C1QL1,C1orf61,C3AR1,C6orf47,CACNA1I,CAMK1G,CAMK2B,CAPN5,CAPS,CASZ1,CCDC151,CCDC33,CCR6,CCRN4L,CD22,CD80,CDC42EP4…
MSigDB Perturbation	WANG_NFKB_TARGETS	Representative genes up-regulated in C2C12 cells (myoblast) lacking NFkB activity due to expression of a super repressor form of NFKBIA [GeneID=4792].	130	0.000270224	0.909034	0.00699257	3.32909	3.6046	12	110	0.00524476	0.109091	5	24	26	4,81,264,359,707,1033,1068,1326,1518,1974,2062,2073	4,81,264,359,707,1033,1068,1326,1518,1974,2062,2073,2923,3127,3292,4186,5487,5507,6243,6257,7184,8412,9352,9856,10678,11325,11603,13491,13864,13968,14308,14420,14639,15206,19811,21528,21601,21827,22163,22275,24311,25695,25883,26223,26568,26953,27117,28442,28524,28815,31028,31413,32189,33141,33209,34499,35289,35387,35466,36300,36334,36354,37815,38395,38658,40395,42526,42928,43528,44754,45317,45571…	ATP2A1,CASP7,FOXA2,HOXA1,ITGB5	ACTC1,APLNR,ATP2A1,CASP7,CAV3,CHRNG,CISH,CMA1,CSRP3,FOXA2,HOXA1,ITGB5,KRT36,MEF2BNB-MEF2B,MIOX,MYH7,MYL4,NOTCH1,RARG,SH3BP1,TNNC1,TNNI1,TNNT1,TRAF5
MSigDB Perturbation	KHETCHOUMIAN_TRIM24_TARGETS_DN	Retinoic acid-responsive genes down-regulated in hepatocellular carcinoma (HCC) samples of TRIM24 [GeneID=8805] knockout mice.	131	0.000285669	0.960991	0.00733581	3.5335	3.11306	11	95	0.00480769	0.11579	3	8	8	6,17,42,265,447,715,744,1134,1262,1649,1666	6,17,42,265,447,715,744,1134,1262,1532,1649,1666,2232,3152,4715,5443,5891,7038,7488,7934,7950,8126,8153,9057,9376,9868,10094,10716,10995,11696,12944,13957,15109,18791,18891,19199,19918,19967,20915,21759,21790,22180,24098,24334,25572,25573,26762,27171,28142,28337,29862,32443,34054,35799,35950,37404,38832,38931,39343,39348,40875,40950,41455,42204,42263,42498,43658,44182,44260,44861,45202,46434,4717…	CYP26A1,FGF1,PRLR	ALDH1A1,AR,CYP26A1,CYP7A1,FGF1,PRLR,SLC10A1,THRSP
MSigDB Perturbation	COLINA_TARGETS_OF_4EBP1_AND_4EBP2	Genes up-regulated in MEF cells (embryonic fibroblast) with double knockout of the translation repressors 4EBP1 [GeneID=1978] and 4EBP2 [GeneID=1979].	132	0.000289932	0.975333	0.00738888	1.3687	91.3273	125	2787	0.0546329	0.0448511	77	347	356	4,21,25,45,49,77,110,129,153,165,171,202,212,214,230,248,252,307,315,333,382,390,392,396,420,428,441,457,473,486,499,504,518,523,535,544,596,599,628,631,650,677,686,687,718,734,742,752,778,796,827,872,910,941,989,1052,1089,1106,1170,1177,1194,1221,1238,1263,1283,1324,1326,1338,1486,1500,1515,1531,1545,1560,1561,1571,1596,1619,1639,1669,1695,1710,1744,1802,1852,1860,1867,1870,1878,1910,1926,1976,2…	4,21,25,45,49,77,110,129,153,165,171,202,212,214,230,248,252,286,307,315,333,382,390,392,396,420,428,430,441,457,473,486,499,504,518,523,535,544,596,599,628,631,650,677,686,687,718,734,742,752,778,796,814,827,872,910,941,989,1052,1062,1089,1106,1170,1177,1194,1199,1221,1238,1249,1263,1283,1324,1326,1338,1380,1396,1486,1500,1515,1531,1538,1545,1560,1561,1571,1596,1619,1639,1658,1669,1695,1709,1710…	ACADM,AIG1,AKAP12,BCAT1,BHLHE40,BICC1,C4BPA,CA13,CCL5,CCNB1,CHRAC1,CP,DIAPH3,DNAJC15,DTD1,FGF7,FMNL3,FOXC1,FST,FUCA1,FXYD5,GALM,GBP4,GLCCI1,GRK5,HELLS,HOXA5,IFI35,ITIH2,KHDRBS3,KIF20A,LAMP2,LY6E,LYPLAL1,MAPRE2,MELK,MFSD1,MRPL23,NACC1,NAMPT,NDC1,NPR3,NR2F1,PAM,PARP12,PFDN1,PHKA2,PHLDA1,POSTN,PPAP2B,PPP1R8,RAD51,RAMP2,RCC2,RECK,RTP4,SESN3,SKAP2,SLC12A2,SLC29A1,SLC41A2,SMARCA2,SNRPE,SNURF,TGM2,THBD,…	ABCC4,ABCG2,ABHD11,ACADM,ACSL5,ADA,ADAMTS1,AGGF1,AIG1,AKAP12,ALDH2,ALDH7A1,ANLN,APTX,ARFGAP2,ASF1B,ASNSD1,ATAD3A,ATM,ATP10D,ATP1B1,AUP1,AURKB,B2M,BACE1,BAG1,BCAT1,BHLHB9,BHLHE40,BICC1,BID,BIRC5,BLVRB,BMI1,BST2,C1R,C3,C4B,C4BPA,CA13,CAMK1,CCBL2,CCL5,CCNA2,CCNB1,CCND1,CD14,CD302,CDC20,CDC25B,CDC42SE1,CDH11,CDK8,CDO1,CDT1,CELF2,CENPH,CENPK,CHRAC1,CLTB,COL2A1,COMMD3-BMI1,CP,CPT1C,CR1L,CREB3L2,CREG1,C…
MSigDB Perturbation	CHARAFE_BREAST_CANCER_LUMINAL_VS_BASAL_DN	Genes down-regulated in luminal-like breast cancer cell lines compared to the basal-like ones.	133	0.000290132	0.976003	0.00733837	1.28953	141.136	182	4307	0.0795455	0.0422568	107	426	437	4,39,63,76,84,89,96,104,105,115,142,144,205,208,219,236,248,252,267,270,275,277,301,302,308,321,351,362,371,373,399,411,417,425,465,470,471,501,533,540,544,554,555,556,560,563,566,575,595,598,631,651,653,659,666,695,705,707,709,716,718,721,731,734,735,769,780,804,829,836,916,930,936,952,961,982,1000,1003,1035,1039,1042,1070,1084,1086,1163,1167,1207,1230,1242,1292,1300,1325,1326,1334,1351,1357,138…	4,39,63,76,84,89,96,104,105,115,142,144,205,208,219,236,248,252,267,270,275,277,286,301,302,308,321,351,362,371,373,399,411,417,425,430,465,470,471,501,533,540,544,554,555,556,560,563,566,575,595,598,631,651,653,659,666,695,705,707,709,716,718,721,731,734,735,740,769,780,804,826,829,830,836,845,862,898,916,930,934,936,952,961,982,1000,1003,1035,1039,1042,1070,1084,1086,1098,1163,1167,1207,1230,12…	ACTN1,ADD3,ADM,ARHGAP23,ARPC2,ASXL1,ATP1B3,B3GNT5,BICC1,CAMTA1,CAV1,CD44,CD97,CDC42EP3,CDH13,CHST3,COL4A2,COTL1,CTSC,DCBLD2,DOCK5,DSC3,DSE,ELK3,F2RL1,FAM101B,FAM171A1,FAM69A,FDFT1,FERMT1,FGF2,FGFBP1,FMNL2,FST,FXYD5,GFOD1,GM2A,HIF1A,HOXA1,HOXA3,HOXA5,HP1BP3,HRCT1,IL15,IL18,IL1A,ITGA6,ITGB8,KIF1B,KIRREL,KLF5,KPNA1,KRT17,LAMA3,LIPG,LOXL2,LYN,MAP4K4,MET,MFGE8,MMADHC,MPZL1,MSN,NAB1,NAMPT,NDFIP2,NR3C1,…	ABCD3,ACTN1,ADA,ADD3,ADM,ADORA2B,ADRB2,AGPS,AIM1,AKR1B1,AKR1C1,AKR1C2,AKR1C3,AKT3,ALDH1A3,ALDH3A2,AMD1,ANKH,ANTXR1,ANXA1,ANXA2,ANXA3,ANXA4,APOL6,ARAP3,ARHGAP23,ARHGAP5,ARHGEF28,ARNTL2,ARPC2,ASXL1,ATP10D,ATP1A1,ATP1B3,AXL,B2M,B3GNT5,BICC1,BICD2,BIN1,BIRC3,BMP1,BNC1,BTG3,BTN3A2,C10orf10,C12orf39,C1R,C1S,C3,CALD1,CAMTA1,CARD6,CASP1,CASP4,CAV1,CAV2,CBR1,CCDC80,CCDC88A,CCNA1,CCNYL1,CD109,CD14,CD44,CD5…
MSigDB Perturbation	MCBRYAN_PUBERTAL_TGFB1_TARGETS_UP	Pubertal genes up-regulated by TGFB1 [GeneID=7040].	134	0.00030916	1	0.0077613	1.44793	63.5392	92	1939	0.0402098	0.0474471	47	164	167	7,18,21,23,67,94,178,194,244,253,276,307,381,401,426,471,473,562,572,597,650,673,720,742,778,781,808,829,846,996,1000,1039,1061,1106,1135,1136,1147,1164,1221,1263,1339,1350,1404,1405,1431,1575,1592,1626,1648,1668,1672,1714,1728,1873,1874,1881,1898,1921,1927,1929,1935,1956,1957,1985,1991,2011,2032,2033,2090,2100,2107,2122,2189,2214,2245,2257,2273,2323,2325,2376,2386,2411,2429,2467,2535,2555,2603,2…	7,18,21,23,67,94,178,194,244,253,276,307,381,401,426,471,473,562,572,597,650,673,720,740,742,778,781,808,814,829,845,846,934,996,1000,1039,1061,1106,1135,1136,1140,1147,1164,1221,1250,1252,1263,1339,1350,1404,1405,1431,1474,1575,1592,1626,1648,1668,1672,1714,1728,1784,1873,1874,1881,1898,1921,1927,1929,1935,1956,1957,1985,1991,2011,2013,2032,2033,2090,2100,2107,2122,2189,2214,2245,2257,2273,2313,…	ACAA2,ACADVL,ACAT1,ANO1,APLP2,ARL4A,BHLHE40,CDKN1A,CEACAM1,COTL1,CP,CPD,CYB561,CYTH1,EPAS1,EPB41L2,F2R,FMR1,GALC,GALNT3,GJA1,GUSB,HK1,IER3,LIPG,LTF,MARCKSL1,MFGE8,NRIP1,PICALM,PTPRK,RPS6KA3,RUNX1,SLC2A1,SOCS2,SOX9,SPIN1,ST14,STAT5B,TGIF1,TGM2,TLE3,TNS1,UBE2D1,UTRN,VEGFA,WNT5A	ACAA2,ACADVL,ACAT1,ACTA2,ACTG2,ADAM10,AK2,AKT1,ANO1,APLP2,ARL4A,ATP1A1,BASP1,BHLHE40,BMP1,BPGM,CA8,CALD1,CAP1,CAPG,CCNK,CD14,CDC42EP5,CDH11,CDKN1A,CDKN2B,CEACAM1,CHD4,CITED1,CLU,CNN1,CNN3,COL16A1,COL8A1,COMT,COPS2,COTL1,CP,CPD,CRIM1,CRK,CSNK2A1,CYB561,CYB5R3,CYC1,CYR61,CYTH1,DKK3,DLAT,DNM2,DPYSL3,DUSP16,ECM1,EGLN1,EGR2,EHD1,EPAS1,EPB41L2,ETS1,ETS2,EXTL3,F2R,F3,FABP3,FABP5,FHL1,FMR1,FN1,FOXA1,FOXP…
MSigDB Perturbation	ZIRN_TRETINOIN_RESPONSE_UP	Genes up-regulated in MS427 cells (Wilms tumor with normal WT1 [GeneID=7490]) after treatment with 10 microM tretinoin (ATRA) [PubChem=444795] for 24 h.	135	0.000311733	1	0.00776793	2.62011	6.48827	17	198	0.00743007	0.0858586	8	20	20	1.51131e+52	15,113,128,145,174,210,332,419,474,630,793,802,823,889,1576,1852,2264,2889,3171,3266,3329,3472,3613,3880,3989,4160,4824,5365,5487,5545,6098,6337,6790,6805,7169,7804,7992,8201,8384,8487,8768,8895,9191,9341,9725,9886,9912,10164,12023,12285,12319,12640,12750,14148,15095,15817,16139,16634,16910,17130,17133,18245,18609,19514,19658,20387,20402,20532,20663,21028,22134,22318,22698,23004,23989,24053,25772…	AKAP12,CTGF,DHRS3,PLGLB1,PLGLB2,RARB,RARRES3,SLCO2A1	AKAP12,CCL2,CTGF,DHRS3,GFM1,LAMA4,NID2,PLAUR,PLGLB1,PLGLB2,PLK2,RARB,RARG,RARRES3,SLC38A2,SLCO2A1,TAL1,THSD4,VGLL3,VMP1
MSigDB Perturbation	LI_PROSTATE_CANCER_EPIGENETIC	Genes affected by epigenetic aberrations in prostate cancer.	136	0.000313834	1	0.00776278	2.08595	12.9438	27	395	0.0118007	0.0683544	12	30	30	5,82,125,135,157,208,211,219,233,308,474,534,555,682,705,823,897,921,1131,1172,1210,1621,1800,1918,2081,2359,2590	5,82,125,135,157,208,211,219,233,308,474,534,555,682,705,823,897,921,1131,1172,1210,1313,1621,1736,1776,1800,1918,1925,1982,2081,2232,2243,2359,2371,2590,2851,2925,2993,3058,3159,3171,3208,3307,3408,3411,4156,4160,4255,4621,4725,4824,5259,5281,5436,5443,5891,5949,6653,7801,7934,7940,8043,8126,8217,8254,8395,8735,8768,8911,9182,9251,9394,9586,9788,10168,10236,10266,10372,10657,10963,10968,11072,11…	CAV1,CCND2,CD44,CDH13,ESR1,HIC1,HPSE,LAMA3,MGMT,RARB,RARRES1,VDR	APC,AR,CAV1,CCND2,CD44,CDH1,CDH13,CDKN2A,CPA3,DAB2IP,DAPK1,DDX53,EDNRB,ESR1,ESR2,GSTP1,HIC1,HPSE,LAMA3,LAMB3,LAMC2,MGMT,NR1I3,PLAU,PTGS2,PXMP4,RARB,RARRES1,RASSF1,VDR
MSigDB Perturbation	RAO_BOUND_BY_SALL4	Loci bound by both isoforms (a and b) of SALL4 [GeneID=57167] in ES cells (embryonic stem).	137	0.00031756	1	0.0077976	1.40442	76.188	107	2325	0.0467657	0.0460215	62	210	226	3,28,37,64,65,84,129,144,169,188,199,221,222,223,309,348,352,356,409,459,484,537,565,592,630,662,701,712,751,765,766,781,793,810,843,866,919,928,947,961,986,987,1022,1039,1046,1077,1142,1156,1182,1187,1190,1226,1239,1246,1272,1289,1418,1441,1485,1507,1530,1563,1567,1571,1593,1636,1648,1719,1728,1729,1731,1778,1790,1821,1839,1852,1869,1924,2047,2065,2079,2113,2168,2181,2189,2230,2241,2326,2343,236…	3,28,37,64,65,84,129,144,169,188,199,221,222,223,309,348,352,356,409,459,484,537,565,592,630,662,701,712,751,765,766,781,793,810,843,866,919,928,947,961,986,987,1022,1039,1046,1077,1142,1156,1182,1187,1190,1226,1239,1246,1272,1289,1416,1418,1441,1485,1507,1530,1563,1567,1571,1593,1636,1647,1648,1719,1728,1729,1731,1778,1790,1821,1839,1852,1869,1924,2006,2023,2047,2065,2075,2079,2113,2168,2181,218…	ADIPOR2,AEBP2,AKAP12,ARHGEF18,ARRDC3,BCAT1,CACYBP,CASQ2,CHD2,CHD7,COL4A2,CTGF,DKK1,DNMT3A,DUSP6,EOMES,EPC2,ETV1,F2RL1,FGF4,FGFBP1,FGFR2,FLRT3,FRYL,GCM1,GJA1,GRSF1,IDH1,IL6ST,INSIG2,IRF2BPL,ITGA1,JARID2,KIAA0247,KLHL5,MAP10,MAP1B,MAP4K4,MAX,MTMR12,MYCN,PARP6,PDPK1,PRDX6,RAB38,RPTOR,RYBP,SEMA4B,SERBP1,SLC25A1,SPRY2,STK38,SULF2,SYNCRIP,TFCP2L1,TMEM57,TPD52,UBL3,UPP1,ZC3HAV1,ZFP36L1,ZNF608	AARD,ABHD17B,ABT1,ADIPOR2,AEBP2,AKAP12,ALG11,AMY2A,ANP32A,ARHGEF18,ARNT,ARRDC3,ASNS,ATG14,AURKB,B4GALT6,BCAT1,C2orf88,CACYBP,CASQ2,CCDC141,CEP112,CFH,CHD2,CHD7,CIDEA,COBL,COL4A2,CPSF4L,CST3,CTGF,CWF19L2,CYB5R1,DDAH1,DGKH,DKK1,DNMT3A,DUSP6,DYRK3,ENSG00000270757,EOMES,EPC2,EPHX2,ETV1,EXOSC7,EYA1,F2RL1,FBXO15,FGD4,FGF4,FGFBP1,FGFR1,FGFR2,FLRT3,FN1,FRYL,GCM1,GCNT2,GJA1,GNA13,GNPNAT1,GPM6A,GPR1,GRSF1,…
MSigDB Perturbation	SHAFFER_IRF4_TARGETS_IN_MYELOMA_VS_MATURE_B_LYMPHOCYTE	IRF4 [GeneID=3662] target genes up-regulated in primary myeloma vs. mature B lymphocytes.	138	0.000322272	1	0.00785596	1.73171	25.9858	45	793	0.0196678	0.0567465	25	98	103	1.05122e+160	105,122,143,203,219,252,386,417,425,450,481,482,514,581,593,652,679,695,971,1166,1198,1202,1261,1633,1689,1761,1886,1889,1915,1916,1986,2016,2063,2132,2218,2256,2282,2330,2342,2366,2461,2471,2492,2539,2581,2623,2638,2686,2716,2898,2934,3114,3624,3736,3863,3870,3879,4177,4204,4416,4418,4647,4898,4914,4918,4920,4922,5009,5056,5068,5157,5170,5213,5233,5263,5306,5307,5329,5330,5430,5458,5469,5779,578…	AHCY,ATF3,BSPRY,CAV1,CD38,CD97,GRSF1,ITGA4,KRAS,LDLRAP1,MPZL1,MXI1,MYC,NAMPT,PAM,PDK1,PDS5A,PPP2R5C,PRDM1,SPATS2,SUMO1,TNFAIP3,TXNDC5,UBE2J1,UCK2	ACP1,AHCY,APOBEC3B,ATF3,ATF4,ATP5D,BCKDHA,BCL2L2,BLOC1S5-TXNDC5,BMI1,BMP6,BSPRY,C11orf24,CANX,CASP3,CAV1,CCL3,CCNC,CCPG1,CD38,CD97,CFLAR,COMMD3-BMI1,CYCS,CYP51A1,DDIT3,DNAJB9,DNAJC10,DUSP5,EIF2S2,ELL,FHL1,FKBP11,GAA,GARS,GFPT1,GNG7,GRSF1,HDAC5,HMBS,HSP90AA1,HSP90B1,HSPB1,ISG20,ITGA4,KRAS,LDHA,LDLR,LDLRAP1,MAN2A1,MARS,MPZL1,MXI1,MYC,NAMPT,NDRG1,NFIL3,NR4A1,P4HA1,PABPC4,PAICS,PAM,PDIA4,PDK1,PDS5A,P…
MSigDB Perturbation	FERRANDO_TAL1_NEIGHBORS	Nearest neighbors of TAL1 [GeneID=6886], based on the close agreement of their expression profiles with that of TAL1 in pediatric T cell acute lymphoblastic leukemia (T-ALL)	139	0.000329401	1	0.00797198	2.80828	5.34135	15	163	0.00655594	0.0920245	2	21	21	1.51131e+48	15,113,128,145,174,210,332,401,419,562,1061,1431,1576,1626,1898,2056,2904,3446,3497,3623,3789,4100,4494,4518,5580,6249,6401,6435,6483,6554,7220,7270,7325,7434,7709,7918,7992,9030,9209,9344,10239,10953,11058,11769,12912,13007,13571,13721,14068,14715,15388,15525,15829,16163,16199,16260,16900,17167,17933,18235,18908,19658,20268,20502,20728,20814,20890,21979,22395,22417,22782,22849,23220,23223,23561,…	RUNX1,TNFRSF1B	BCL2A1,CD2,CD3E,CD6,CDA,CRIP1,CSF1R,CXCR1,DTYMK,FCGR3B,FOLR1,IL23A,ITGB2,LCK,LGALS3,MYBL2,RUNX1,TCF7,TMSB15A,TMSB15B,TNFRSF1B
MSigDB Perturbation	NAKAMURA_CANCER_MICROENVIRONMENT_DN	Genes down-regulated in pancreatic cancer cells grown in orthotopic xenograft tumors compared to those grown in vitro.	140	0.000335176	1	0.0080538	1.99021	15.0738	30	460	0.0131119	0.0652174	11	45	45	15,72,113,128,129,131,145,174,185,210,217,332,414,419,735,736,871,1374,1401,1571,1576,2447,2469,2571,2598,2599,2659,2668,2699,2704	15,72,113,128,129,131,145,174,185,210,217,332,414,419,735,736,871,1374,1401,1571,1576,1622,2327,2447,2469,2571,2598,2599,2659,2668,2699,2704,2963,2985,3136,3167,3273,3512,3528,3560,3582,3838,3957,3963,4148,4274,4308,4331,4564,4684,4787,4850,4864,4909,4990,5100,5247,5365,5674,5691,5865,5950,6181,6195,6582,6865,7152,7412,7504,7661,7780,7840,7907,7961,7992,8263,8348,8430,8443,8691,8907,9236,9238,931…	BCAT1,COTL1,DHRS3,KLHL5,NDC1,PSAT1,RIPK2,SLC30A5,SYNCRIP,TARS,USP39	AGPS,ARTN,ASNS,AURKA,BCAT1,BUB1,CARS,CCNB2,CDC20,CDC6,CDCA2,COTL1,CTH,DHFR,DHRS3,FAM83D,FANCI,HOMER2,IARS,IMPAD1,KIF2C,KLHL5,KNSTRN,LSM4,MARS,NDC1,NDUFA9,PA2G4,PSAT1,PSMG1,PSPH,RFC4,RFC5,RIPK2,SHROOM3,SLC30A5,SLC7A11,SPAG5,SYNCRIP,TARS,TCP1,TNS3,TRIP13,TXNRD1,USP39
MSigDB Perturbation	HUANG_FOXA2_TARGETS_DN	Genes down-regulated in H358 cells (lung cancer) by inducible expression of FOXA2 [GeneID=3170] in a Tet-off system.	141	0.000338083	1	0.00806605	2.2282	10.3223	23	315	0.0100524	0.0730159	9	34	36	2.11733e+78	21,173,278,307,473,560,597,650,705,709,778,808,862,1106,1154,1163,1221,1313,1621,1678,1827,2032,2467,2590,2648,2665,2763,2799,2875,2951,3099,3159,3208,3212,3437,4255,4360,4472,4491,4498,4908,5320,5417,5670,5802,5949,5953,6004,6109,6307,6376,6525,6570,6586,6752,6945,7322,7408,7677,8009,8105,8243,8290,8395,8544,8977,9394,9606,9641,10238,10527,10576,10917,11059,11072,11194,11406,11729,11793,11843,12…	ATP2B4,CD44,CDKN1A,CEACAM1,CLIC3,CTSB,LOXL2,SSBP2,TGM2	ACOX2,ATP2B4,CD44,CDH3,CDKN1A,CEACAM1,CFI,CLIC3,COL13A1,COL6A1,CTSB,CXCL2,GALNT6,GAS2L1,IGFBP6,ITGB4,KRT81,LEPR,LOXL2,PLAT,PLAUR,PROS1,SCEL,SMAD6,SPARC,SPP1,SRPX,SSBP2,ST6GAL1,STEAP3,STS,TGFBI,TGM2,TNC
MSigDB Perturbation	LEE_AGING_NEOCORTEX_UP	Upregulated in the neocortex of aged adult mice (30-month) vs young adult (5-month)	142	0.000338671	1	0.00802317	1.85888	19.3665	36	591	0.0157343	0.0609137	20	87	88	59,94,122,194,288,309,434,463,545,613,627,662,716,728,735,907,970,1024,1035,1322,1334,1350,1530,1758,1886,1915,1946,2019,2125,2388,2408,2413,2513,2592,2636,2708	59,94,122,194,288,309,434,463,545,613,627,662,716,728,735,907,970,1024,1035,1322,1332,1334,1350,1530,1645,1758,1886,1915,1946,1995,2019,2125,2361,2388,2408,2413,2513,2592,2636,2708,2934,3007,3151,3238,3365,3521,3609,3629,3631,3746,3764,3832,3870,3927,4123,4270,4312,4406,4474,4516,4621,4822,4845,4999,5042,5103,5195,5269,5346,5368,5514,5605,5633,5649,5661,5724,5779,5863,5953,5985,6131,6140,6480,663…	ADRBK1,AK3,ATP1B3,CD40,CTNNB1,CTSD,CTSZ,CYB561,DLG1,DNAH8,GADD45A,MPEG1,NUB1,PPP2R5C,PSAT1,PTGS1,SEMA4B,SET,UBC,VEGFA	ADRBK1,AK3,AKT2,ALDOC,APOD,ATP1B3,AVP,B2M,C1QA,CCL21,CD40,CD68,CD9,CKB,CMPK1,CRYAB,CSNK1D,CSNK1G2,CTNNB1,CTSD,CTSS,CTSZ,CYB561,DDIT3,DHX15,DLG1,DNAH8,DNAJA4,DNAJB13,EEF2,FOS,FXYD6,GADD45A,GFAP,GNA15,GPX1,HSD17B12,HSP90B1,ICAM2,ID1,IFI27,ITIH3,JUNB,KCNA1,LAMB1,LCAT,LGALS3BP,LIMK1,M6PR,MAG,MOG,MPEG1,MYL9,NAPA,NDRG1,NR4A1,NUB1,OXT,P4HA1,PHB,POLR2F,PPIA,PPP1R2,PPP2R5C,PSAT1,PTGS1,RAB14,RAB4A,RHOG,RRA…
MSigDB Perturbation	SIMBULAN_UV_RESPONSE_IMMORTALIZED_DN	Genes down-regulated in response to UVB radiation in HFK cells (keratinocytes) immortalized by overexpression of HPV E6 and E7 viral oncogenes.	143	0.00033957	1	0.00798819	2.07544	13.0093	27	397	0.0118007	0.0680101	11	31	31	1.10115e+88	110,115,180,208,308,396,474,481,499,504,555,616,677,749,807,823,836,980,982,1137,1313,1465,1513,1786,1910,2086,2256,2309,2432,2488,2502,2747,2822,2855,3089,3113,3286,3340,3530,3576,3747,3786,3798,3862,3874,4050,4087,4088,4104,4160,4416,4597,4737,4761,5138,5181,5222,5281,5544,5625,5666,5710,5742,5782,5966,6041,6066,6315,6681,6881,6891,7023,7032,7188,7213,7250,8347,8914,9131,9307,9415,9584,9762,976…	DUSP7,IGF1R,ITGA6,JAK1,LAMA3,MYC,PRKAR1A,SEMA3C,THBD,THBS1,TOP2B	AHNAK,CALD1,CCND1,CDH3,DDX21,DUSP7,EGFR,EMP1,EREG,FN1,ID1,IGF1R,ITGA2,ITGA6,JAK1,LAMA3,MYC,NAP1L1,NBN,PLEC,PRKAR1A,PTP4A1,RDX,ROCK1,RRM2,SEMA3C,SF3A2,TACC1,THBD,THBS1,TOP2B
MSigDB Perturbation	OSADA_ASCL1_TARGETS_UP	Genes up-regulated in A549 cells (lung cancer) upon expression of ASCL1 [GeneID=429] off a viral vector.	144	0.000340188	1	0.00794718	2.04418	13.6975	28	418	0.0122378	0.0669856	12	43	46	8,28,86,133,149,216,498,605,782,787,855,921,965,1027,1120,1336,1430,1433,1553,1614,1819,1904,1986,1990,2281,2384,2601,2710	8,28,86,133,149,216,498,605,782,787,855,921,965,1027,1120,1336,1430,1433,1553,1614,1819,1904,1986,1990,2281,2355,2384,2601,2710,2874,2882,2939,3038,3072,3177,3221,3322,3574,3595,3596,3687,3845,3873,3918,4094,4198,4869,4922,4929,5068,5253,5436,5600,5825,5860,5894,5928,6342,6625,6635,6771,7097,7166,7498,7595,7701,7720,7796,7809,8196,8276,8288,8369,8402,8502,8615,8776,8990,9077,9291,9381,9621,9801,9…	ANGPT2,ATF3,ITGA1,LFNG,MTSS1,MYB,RASGRP3,RGS16,RHOBTB3,SCG2,SEMA6A,VDR	ANGPT2,ATF3,BDKRB1,BDKRB2,BMF,CALY,CBFA2T3,CCR6,CHGB,CLDN14,DLL1,EDN3,GAS2,GPR56,GRASP,IGFBP1,IGFBP5,ITGA1,JAG2,KLK1,KRT13,LFNG,LTB,MTSS1,MYB,PPP1R16B,RAB37,RASA4,RASGRP3,RASSF4,RET,RGS16,RHOBTB3,RNF128,SCG2,SCG3,SEMA3E,SEMA6A,SMYD3,SSTR1,SSTR2,SYTL2,VDR
MSigDB Perturbation	FLECHNER_PBL_KIDNEY_TRANSPLANT_OK_VS_DONOR_DN	Genes downregulated in peripheral blood lymphocytes (PBL) from patients with well functioning kidneys more than 1-year post transplant compared to those from normal living kidney donors.	145	0.000347486	1	0.00806167	1.9859	15.1065	30	461	0.0131119	0.0650759	15	40	40	16,76,207,328,397,425,462,463,468,673,756,1207,1242,1248,1271,1397,1412,1495,1631,1637,1694,1935,2019,2098,2186,2388,2408,2501,2581,2711	16,76,207,328,397,425,462,463,468,673,756,1207,1242,1248,1271,1397,1412,1495,1631,1637,1694,1935,2019,2098,2186,2388,2408,2501,2581,2711,3344,3346,3438,4177,4196,4294,4670,4796,4883,5008,5125,5203,5309,5329,5386,5405,5523,5661,5780,5796,5817,5846,6048,6250,6379,6896,6981,7158,7235,8303,8550,8703,8805,8868,9142,9224,9316,9364,9609,9965,10158,10192,10228,10285,10287,10529,10792,10793,10901,11052,11…	AHR,ANP32E,ARFGAP3,CD53,CDC42EP3,DNAJB6,IL1B,LYN,MYL12B,PTPN12,RHEB,SLC2A3,TRAF3IP3,UBE2E3,USP7	ABL1,AHR,AMFR,ANP32E,ANXA5,ARFGAP3,ATP6V1G1,BCLAF1,CANX,CD53,CDC42EP3,DDX5,DNAJB6,EID1,ETFA,FLI1,GADD45B,IL1B,IMPA1,ITSN2,LY96,LYN,MAPK14,MKNK1,MYL12B,NFYA,PAPD7,PAX8,PPP1R10,PTPN12,PYROXD1,RAB11A,RHEB,SLC2A3,SQLE,TRAF3IP2,TRAF3IP3,UBE2E3,USP7,ZBED4
MSigDB Perturbation	BROCKE_APOPTOSIS_REVERSED_BY_IL6	Genes changed in INA-6 cells (multiple myeloma, MM) by re-addition of IL6 [GeneID=3569] after its initial withdrawal for 12h.	146	0.000352537	1	0.00812283	1.50675	49.7762	75	1519	0.0327797	0.0493746	39	142	145	16,31,61,143,171,207,252,328,335,347,350,480,485,492,538,565,584,586,592,599,605,625,662,673,705,713,742,749,756,843,1040,1097,1120,1130,1138,1148,1154,1201,1261,1263,1286,1299,1336,1370,1397,1399,1433,1530,1556,1620,1621,1705,1889,1935,2016,2098,2100,2122,2132,2168,2216,2263,2282,2285,2393,2448,2471,2475,2521,2551,2590,2609,2648,2711,2738	16,31,61,143,171,207,252,328,335,347,350,480,485,492,538,565,584,586,592,599,605,625,662,673,705,713,742,749,756,843,1040,1097,1120,1130,1138,1148,1154,1201,1261,1263,1286,1299,1336,1370,1397,1399,1433,1530,1556,1620,1621,1658,1705,1888,1889,1905,1935,2013,2016,2089,2098,2100,2122,2132,2168,2178,2216,2263,2268,2282,2285,2393,2448,2471,2475,2495,2521,2551,2590,2609,2648,2711,2738,2869,2898,2924,29…	ADIPOR2,ANAPC10,ARFGAP3,ATP2B4,BCL2L11,BCL6,BHLHE40,CD180,CD44,CEBPB,CHST15,EPB41L2,EVI2A,EVI2B,FOXO3,GADD45A,HBEGF,IER2,IL6ST,IRF1,IRF4,LTBP1,MAFF,MAP1B,MARCKS,NAMPT,PIM1,PRDM1,PTP4A3,PTPRG,RGS16,RHOBTB3,SLA,SLC2A3,ST3GAL6,TGIF1,TMEM184B,WIPI1,ZFP36L2	ACPP,ADIPOR2,ANAPC10,AP1S2,ARFGAP3,ATP2B4,BCL2L11,BCL3,BCL6,BHLHE40,C10orf10,CADPS,CAV2,CCL2,CCNC,CD180,CD44,CD8B,CDK17,CEBPB,CHST15,CXCR4,DAPK1,DNAJA2,DNAJB9,DOHH,DPM1,DUSP3,DUSP5,DYRK3,EEF1E1,EIF4E,EIF5,ELL2,ENSG00000259529,EPB41L2,EVI2A,EVI2B,FAM3C,FLOT1,FOXO3,GADD45A,GADD45B,GAS6,GATM,GNA13,GRB2,HBEGF,HCK,HEG1,HHLA1,HNRNPU,HSPA13,HSPA1B,ICAM1,ID1,ID3,IER2,IFNGR1,IL6ST,IRF1,IRF4,IRF9,JUN,JUNB,…
MSigDB Perturbation	FONTAINE_THYROID_TUMOR_UNCERTAIN_MALIGNANCY_DN	Genes down-regulated in thyroid tumors of uncertain malignancy (T-UM) compared to other thyroid tumors.	147	0.000355191	1	0.00812832	2.68278	5.96397	16	182	0.00699301	0.0879121	8	24	25	66,80,425,432,446,514,530,652,723,971,1206,1667,1822,2366,2461,2581	66,80,425,432,446,514,530,652,723,971,1206,1667,1822,2366,2461,2581,3007,3488,3535,3639,3736,3746,4035,4177,4743,5648,5780,6131,6241,6560,6575,7158,7456,8541,9142,9662,10562,11016,11265,11665,11733,11874,12237,13012,13579,13686,13795,15018,15068,15609,15894,17637,18152,18489,18853,19576,19790,19857,19980,20079,21892,22370,22654,22660,22883,24311,24422,24657,25595,25619,25695,26186,26292,26987,273…	BAP1,CD38,ITGA4,LILRB3,PLCG2,PTGES,TWIST1,VAV2	ATR,BAP1,CD274,CD38,FRZB,HCLS1,IFITM3,IGSF10,IL24,IL2RA,ITGA4,KLF1,KLK2,LILRB3,PCSK6,PLCG2,PPIL4,PTGES,ROGDI,S100A10,SLPI,TRAF5,TWIST1,VAV2
MSigDB Perturbation	BROWNE_HCMV_INFECTION_20HR_UP	Genes up-regulated in primary fibroblast cell culture after infection with HCMV (AD169 strain) at 20 h time point that were not up-regulated at the previous time point, 18 h.	148	0.000370264	1	0.00841601	1.44629	62.2284	90	1899	0.0393357	0.0473934	53	233	244	31,40,75,81,94,115,129,140,202,239,241,280,326,356,406,440,495,505,508,564,586,616,622,629,658,722,723,757,768,798,810,836,869,891,986,1007,1029,1033,1035,1082,1194,1245,1255,1260,1269,1283,1333,1350,1353,1372,1465,1503,1516,1536,1554,1555,1569,1571,1682,1792,1808,1845,1873,1874,1890,1894,1968,2000,2064,2118,2198,2234,2236,2263,2309,2346,2400,2409,2421,2482,2501,2502,2524,2528,2557,2586,2591,2597…	31,40,75,81,94,115,129,140,202,239,241,280,326,356,406,440,495,505,508,513,564,586,616,622,629,658,722,723,757,768,798,810,836,869,891,986,1007,1029,1033,1035,1082,1194,1245,1255,1260,1269,1283,1317,1333,1345,1350,1353,1372,1465,1503,1516,1536,1554,1555,1569,1571,1682,1792,1808,1845,1873,1874,1890,1894,1968,2000,2064,2118,2147,2198,2234,2236,2263,2309,2346,2400,2409,2421,2482,2501,2502,2524,2528,…	AGTPBP1,ALAS1,ARHGAP32,ARHGAP44,B4GALT5,BAP1,C18orf25,CASP7,CCR1,CDK20,DLX2,DNAJA1,DUSP7,EED,EFNB2,EYA2,FAM49A,FOXO1,GTF2A1,KHDRBS3,KIF5C,LYN,MAP3K3,MED6,NACAD,NFATC3,NTRK2,PDK3,PGM3,PLCL1,PPARA,PROX1,PRPF19,PTPRD,REL,RELA,SEPT4,SIKE1,SLC22A5,SLC6A6,SOX5,SRSF3,STARD3,TFDP2,TMPO,TRIM33,UBE3A,USP6NL,VEGFA,ZBTB18,ZNF131,ZNF37A,ZNF41	ABAT,ABCB1,ABCF3,ADAMTS3,AGTPBP1,AHCTF1,AKAP8L,ALAS1,APOE,ARFIP2,ARHGAP32,ARHGAP44,ATP1A3,ATRN,ATXN2L,B4GALT5,BAK1,BAP1,BCL7B,BRAF,BRD2,BTRC,C18orf25,C19orf26,C4BPB,CA2,CASP7,CBX4,CCDC181,CCNC,CCND3,CCR1,CDC34,CDC42,CDC5L,CDK20,CDKL5,CDKN2B,CELF1,CGGBP1,CHMP7,CHST10,CHST2,CLGN,CLOCK,CLUH,COL2A1,DDX52,DFFB,DLX2,DNAJA1,DOCK3,DOHH,DUSP3,DUSP7,DUSP8,E2F4,E2F6,EDA,EED,EFNA4,EFNB2,ELK4,EN2,ENSG00000088…
MSigDB Perturbation	TAKEDA_TARGETS_OF_NUP98_HOXA9_FUSION_10D_UP	Genes up-regulated in CD34+ [GeneID=947] hematopoetic cells by expression of NUP98-HOXA9 fusion [GeneID=4928;3205] off a retroviral vector at 10 days after transduction.	148	0.000370264	1	0.00841601	1.44629	62.2284	90	1899	0.0393357	0.0473934	50	176	179	15,76,86,93,104,110,113,128,136,145,160,174,190,198,209,210,213,216,219,230,248,250,289,311,321,325,332,362,419,460,499,504,514,525,556,565,574,575,583,585,591,629,652,656,677,733,782,787,824,838,859,867,889,890,966,971,1009,1035,1057,1116,1212,1242,1493,1508,1566,1576,1606,1610,1619,1637,1760,1792,1797,1807,1910,1928,1990,1998,2143,2179,2188,2189,2211,2231,2366,2430,2497,2544,2556,2622	15,76,86,93,104,110,113,128,136,145,160,174,190,198,209,210,213,216,219,230,248,250,254,289,311,321,325,332,362,419,460,499,504,514,525,556,565,574,575,583,585,591,611,629,652,656,677,733,782,787,824,838,859,867,889,890,966,971,1009,1035,1057,1094,1116,1212,1242,1313,1493,1508,1566,1576,1602,1606,1610,1619,1632,1637,1760,1792,1797,1804,1807,1841,1910,1928,1990,1998,2061,2106,2143,2179,2188,2189,2…	ADRB1,AFF3,ANGPT2,ARL4A,ASB2,ATP10A,CADM1,CAV1,CD1D,CD38,CDC42EP3,CFP,CHRNA6,DEFB1,DHRS3,DUSP4,FAM134B,FBXL20,FCER2,FLNB,GALNT12,HMGCS1,HOXA3,HOXA5,HS3ST3B1,IL15,IL31RA,INPP4B,ITGB7,LILRA5,LY6E,MACC1,OLFM3,PALLD,RARRES3,RBPMS,RTP4,SCN4B,SERPINE2,SLC6A13,SLC8A1,SOX4,SP110,SPOCK1,STXBP6,TFDP2,THBS1,UST,ZNF503,ZNF521	ABLIM1,ADCYAP1,ADRB1,ADSSL1,AFF3,ALDH1A1,ANGPT1,ANGPT2,APOL6,ARG2,ARHGAP5,ARL4A,ASB2,ATP10A,AUTS2,BATF3,BTLA,C15orf48,C19orf77,CADM1,CALB1,CAV1,CCR6,CD1D,CD38,CDC42EP3,CDH1,CDKN1C,CFD,CFI,CFP,CHRNA6,CKB,CLECL1,CLNK,CMPK2,CXCL10,DBN1,DDX58,DDX60,DDX60L,DEFB1,DHRS3,DHRS9,DLC1,DMD,DNAJC6,DUSP4,EGLN3,EIF2AK2,EPCAM,FAM134B,FBXL20,FCER2,FERMT2,FGF18,FLNB,FLT3,FN1,GALNT12,GATM,GBP1,GEM,GMPR,GNAI1,GPR124…
MSigDB Perturbation	GARY_CD5_TARGETS_UP	Genes up-regulated in Daudi cells (B lymphocytes) stably expressing CD5 [GeneID=921] off a plasmid vector.	150	0.000377213	1	0.00845963	1.30916	120.688	158	3683	0.0690559	0.0428998	103	450	460	19,31,37,58,59,61,77,92,94,122,152,178,181,193,208,222,249,271,290,300,308,309,328,347,349,350,369,388,408,494,509,511,515,522,533,536,545,555,560,561,582,586,603,605,625,628,636,703,709,723,728,735,766,767,796,805,869,875,885,901,922,958,959,969,972,973,988,1022,1024,1075,1077,1099,1103,1116,1130,1143,1162,1253,1306,1318,1324,1350,1407,1433,1478,1501,1514,1529,1593,1609,1610,1668,1669,1695,1706,…	19,31,37,58,59,61,77,92,94,122,152,178,181,193,208,222,229,249,271,290,300,308,309,328,347,349,350,369,388,408,494,509,511,515,522,533,536,545,555,560,561,582,586,603,605,625,628,636,688,703,709,723,728,735,745,766,767,796,805,853,869,875,885,901,922,958,959,969,972,973,988,1022,1024,1075,1077,1099,1103,1116,1130,1143,1162,1253,1306,1318,1324,1350,1407,1433,1437,1478,1501,1514,1529,1593,1609,1610…	ADRBK1,AHCYL1,AKAP13,ARID1A,ASAP1,ASCC1,AUH,BAP1,BCL2,BCL2L11,BNIP3L,CALM1,CALML4,CAMK2D,CCNG1,CD55,CD83,CD99L2,CDKN1A,CEBPB,CEBPG,CHI3L2,CSNK1E,CYSTM1,DDIT4,DESI2,DLG1,EVI2A,FAM162A,FDFT1,FOXK2,FXYD5,GLCCI1,GM2A,GNS,GRAMD1A,HELLS,HIBADH,HMGA1,HMGCS1,HPCAL1,IDH2,IL21R,IRF1,KCNN3,KIF21B,KPNA1,LAMA3,LRBA,MAPRE2,MARCH1,MARK4,MID1IP1,MND1,NBEAL2,NCOA3,NPC2,NUCB2,NUP210,PARVB,PCGF5,PDK1,PILRB,PKN1,PKN…	AAAS,AARS,ABHD6,ACKR3,ACLY,ACY1,ADRBK1,ADRBK2,AGPAT1,AGRN,AHCYL1,AIP,AKAP13,ALDH16A1,ALDH6A1,ALDOC,ALKBH7,ALOX5,AMFR,ANKRD11,AP2A1,APBB2,APEH,APOA1BP,ARID1A,ARL2,ASAP1,ASCC1,ASL,ASMTL,ASNS,ATF4,ATP5D,ATXN2L,AUH,AURKB,BAP1,BCKDK,BCL2,BCL2A1,BCL2L11,BCL3,BNIP3L,BRAF,BTG2,C11orf92,CAB39,CADPS,CALM1,CALM2,CALM3,CALML4,CALR,CAMK2D,CAMLG,CAPNS1,CARS,CBS,CCBL2,CCL4,CCNB1IP1,CCNG1,CCR7,CD22,CD37,CD48,CD5…
MSigDB Perturbation	MCBRYAN_PUBERTAL_BREAST_6_7WK_UP	Genes up-regulated during pubertal mammary gland development between week 6 and 7.	151	0.000380282	1	0.00847197	1.48139	54.0034	80	1648	0.034965	0.0485437	36	183	186	18,67,70,73,83,109,131,155,178,185,191,217,244,253,300,401,414,471,472,515,529,562,565,572,641,720,736,757,798,812,813,859,871,922,988,996,1000,1007,1061,1082,1135,1136,1147,1164,1172,1323,1374,1401,1410,1431,1542,1575,1592,1626,1727,1881,1898,1919,1927,1991,1997,2011,2033,2130,2245,2323,2325,2359,2386,2411,2418,2429,2469,2525,2555,2627,2668,2707,2735,2738	18,67,70,73,83,109,131,155,178,185,191,217,244,253,300,401,414,471,472,515,529,562,565,572,641,720,736,740,757,798,812,813,845,859,871,922,934,988,992,996,1000,1007,1061,1063,1082,1135,1136,1147,1164,1172,1252,1323,1374,1401,1410,1431,1474,1542,1543,1575,1585,1592,1626,1678,1727,1736,1881,1898,1919,1925,1927,1982,1991,1997,2011,2033,2119,2130,2242,2243,2245,2323,2325,2359,2371,2386,2411,2418,2429…	APLP2,ARHGEF2,C19orf12,CCND2,CP,CPD,CYTH1,DDX6,EHD2,EIF4EBP2,EPAS1,EPB41L2,FGG,GM2A,GNAS,GUSB,HIPK2,IL6ST,KDM5A,LIPG,LPGAT1,MLXIPL,NFATC3,NR2C2,NRIP1,PIK3R1,PRPF19,RASSF3,RUNX1,SH2B3,SLC2A5,SOX9,STAT5B,SYNCRIP,TNS1,WNK1	ABCC3,ACACA,ACLY,AKAP9,AKT1,AKT2,ANKH,APLP2,ARHGEF2,ATP1A3,ATP5A1,ATP6V0A1,ATP8A1,BPNT1,BRD4,BRD8,BTN1A1,C19orf12,C20orf27,CA8,CANT1,CCND2,CD99,CHD4,CHI3L1,CLEC3B,CNOT3,COMT,CORO1A,CP,CPD,CRIM1,CRK,CSN2,CSNK2A1,CUX1,CYGB,CYTH1,DAPK1,DDX6,DHX36,DNM2,DPYSL3,EBF3,ECM1,EGLN1,EHD1,EHD2,EHD3,EIF3C,EIF4EBP2,EIF4G1,EPAS1,EPB41L2,ETS1,EXTL3,FADS2,FGG,FSCN1,FTO,FZD4,GALNT2,GBP7,GM2A,GNAS,GPAM,GRB10,GUSB,GY…
MSigDB Perturbation	SHAFFER_IRF4_TARGETS_IN_ACTIVATED_B_LYMPHOCYTE	IRF4 [GeneID=3662] target genes induced after activation of primary B lymphocytes by anti-IgM crosslinking.	152	0.000384592	1	0.00851162	1.78199	22.4468	40	685	0.0174825	0.0583942	22	79	82	10,94,105,148,187,219,260,281,377,403,436,450,459,475,481,493,560,640,653,679,695,709,904,1059,1166,1170,1198,1219,1350,1389,2063,2151,2230,2246,2352,2492,2521,2542,2558,2762	10,94,105,148,187,219,260,281,377,403,436,450,459,475,481,493,560,640,653,679,695,709,904,1059,1166,1170,1198,1219,1228,1350,1389,1689,2063,2151,2230,2246,2352,2492,2521,2542,2558,2762,2778,2934,2994,3027,3056,3074,3114,3238,3273,3385,3517,3545,3590,3629,3691,3870,3885,3910,4308,4386,4387,4476,4477,4516,4564,4605,4670,4898,4914,4953,5056,5242,5248,5263,5269,5333,5469,5495,5506,5670,5691,5715,5778…	AHCY,BCL2,BSPRY,CAV1,CD97,FDFT1,GFOD1,GNPDA1,GRSF1,GTF2IRD1,HIVEP2,IDH1,IRF4,KRAS,KTN1,MYC,PAM,RIN2,ST3GAL1,TBC1D8,UCK2,VEGFA	ACP1,AHCY,ALDOC,ATP5D,AURKA,BCL2,BMI1,BMP6,BSPRY,CANX,CASP3,CAV1,CCL3,CCNC,CD97,CFLAR,COMMD3-BMI1,CTH,CYCS,CYP51A1,EIF2S2,ELL2,FADS1,FDFT1,GARS,GART,GFOD1,GNG10,GNPDA1,GOLGA7,GRSF1,GTF2IRD1,HILPDA,HIVEP2,HK2,HMBS,HMGCR,IDH1,INSIG1,IRF4,KRAS,KTN1,LDHA,LDLR,LONP1,MARS,ME2,MSMO1,MVK,MYC,NDRG1,OSBPL8,PAICS,PAM,PGK1,PNP,PRPF40A,RIN2,RPP30,SCD,SEPT11,SERF1A,SERF1B,SLAMF7,SLC31A1,SLC3A2,SNX9,SQLE,SRPK1,…
MSigDB Perturbation	CUI_TCF21_TARGETS_DN	Genes most strongly down-regulated in kidney glomeruli isolated from TCF21 [GeneID=6943] knockout mice.	153	0.00038707	1	0.00851048	2.2529	9.76517	22	298	0.00961539	0.0738255	11	27	29	8.71012e+74	87,101,232,276,298,380,390,566,628,683,685,952,1404,1638,1775,1828,1921,2279,2358,2362,2486,2535,3015,3075,3081,3397,3554,3648,3953,4348,4422,4492,4558,4660,4751,4953,5000,5521,5566,5664,6062,6381,6404,6407,6414,6615,6785,7139,7288,7307,7330,7567,8241,8242,8344,8828,9593,9888,10120,10148,10455,10592,10766,11152,11208,11312,11343,11989,12258,12345,12857,12871,13032,13094,13213,13214,13225,13604,14…	ADM,CD55,CLIC5,GABRA4,GALC,MERTK,NPHS2,PARP4,SGIP1,SH3BGRL2,SLC12A2	ADM,ART3,C4orf32,CD55,CLIC5,COL4A3,EGF,GABRA4,GALC,HSPA1B,IQGAP2,LRRFIP1,MAPT,MERTK,NPHS2,PARP4,PDE10A,PTGER4,RHPN1,SCD,SEMA3E,SGIP1,SH3BGRL2,SLC12A2,TLR4,TOP1MT,TSPAN2
MSigDB Perturbation	GRAESSMANN_APOPTOSIS_BY_DOXORUBICIN_DN	Genes down-regulated in ME-A cells (breast cancer) undergoing apoptosis in response to doxorubicin [PubChem=31703].	154	0.000402405	1	0.00879019	1.13852	469.908	535	14340	0.233829	0.0373082	332	1711	1732	6,8,10,11,17,18,19,23,30,38,39,41,42,49,50,58,59,60,61,63,64,69,71,73,79,83,96,107,109,111,116,130,131,132,139,142,143,148,151,153,159,160,162,172,178,181,185,187,193,203,204,212,214,215,217,219,221,226,228,235,236,244,250,253,257,258,265,268,270,274,275,277,279,281,294,299,301,302,316,339,344,347,348,351,354,368,375,376,381,401,403,414,417,420,425,426,428,436,441,444,445,447,450,454,461,471,481,…	6,8,10,11,17,18,19,23,30,38,39,41,42,49,50,58,59,60,61,63,64,69,71,73,79,83,96,107,109,111,116,130,131,132,139,142,143,148,151,153,159,160,162,172,178,181,185,187,193,203,204,212,214,215,217,219,221,226,228,229,235,236,244,250,253,257,258,265,268,270,274,275,277,279,281,294,299,301,302,316,339,344,347,348,351,354,368,375,376,381,401,403,414,417,420,425,426,428,436,441,444,445,447,450,454,461,471,…
,26943,26948,26952,26962,26963,26973,26975,26982,26987,26991,26995,26998,27033,27037,27047,27048,27050,27053,27059,27060,27061,27070,27080,27090,27091,27092,27096,27097,27101,27116,27121,27123,27127,27136,27141,27142,27143,27161,27162,27166,27184,27185,27191,27192,27200,27201,27207,27211,27215,27216,27228,27231,27236,27241,27247,27255,27257,27258,27260,27268,27271,27279,27283,27290,27297,27301,27…
57,53158,53172,53185,53188,53192,53203,53205,53208,53215,53216,53246,53248,53250,53253,53255,53269,53275,53282,53293,53297,53298,53299,53301,53302,53309,53310,53316,53318,53319,53322,53339,53340,53346,53349,53350,53353,53355,53363,53373,53377,53380,53389,53390,53393,53394,53397,53400,53405,53410,53414,53418,53419,53426,53432,53433,53436,53438,53440,53443,53452,53454,53457,53458,53464,53471,53472,…	AATF,ACAA2,ACSL4,ACVR1,ACVR1B,ADAT2,ADCK3,ADD3,ADNP,AK3,AKAP12,AKR1E2,ANAPC1,ANKRD17,ARHGAP21,ARHGAP31,ARHGEF10,ASAP1,ATE1,ATF2,ATG10,ATG5,ATP10A,ATP5SL,ATP9A,ATXN2,BAZ2B,BBX,BCKDHB,BCL2,BEAN1,BICC1,BLOC1S5,BNIP3L,BRCA2,C9orf123,CACNA1A,CADM1,CALM1,CAMK2D,CAPRIN1,CAV1,CBX5,CCDC91,CCL5,CCNH,CD2AP,CD44,CDC27,CDC42BPA,CEBPB,CEBPG,CETN3,CHD1,CHD7,CLSTN1,CNOT4,CNTN1,COL4A3BP,COMMD1,COX20,CTNNB1,CUL4B,…	AAK1,AARSD1,AATF,ABCB7,ABCC1,ABCD3,ABCE1,ABHD17C,ACAA2,ACACB,ACBD6,ACHE,ACIN1,ACOT9,ACSL4,ACTB,ACTR8,ACVR1,ACVR1B,ADAM10,ADAM17,ADAMTS5,ADAMTSL5,ADAT1,ADAT2,ADCK1,ADCK3,ADD3,ADK,ADNP,AGAP1,AGFG2,AGK,AHCTF1,AHDC1,AK3,AKAP12,AKAP2,AKAP8,AKR1E2,ALDH18A1,ALDH1B1,ALDOA,ALG12,ALG14,ALG3,ALKBH4,AMBRA1,AMZ1,AMZ2,ANAPC1,ANAPC11,ANAPC4,ANGPT1,ANGPTL6,ANKH,ANKRD13B,ANKRD17,ANLN,ANP32B,ANXA6,AOC3,AP1G1,AP2B1…
MSigDB Perturbation	WANG_IMMORTALIZED_BY_HOXA9_AND_MEIS1_DN	Down-regulated genes in myeloid progenitors immortalized by HOXA9 [GeneID=3205] vs those immortalized by HOXA9 and MEIS1 [GeneID=4211].	155	0.000440315	1	0.00955626	2.18655	10.5189	23	321	0.0100524	0.0716511	9	23	23	18,57,253,368,396,668,737,867,1064,1091,1111,1136,1164,1423,1512,1592,1927,1984,2169,2325,2429,2511,2735	18,57,253,286,368,396,430,668,737,867,1064,1091,1111,1136,1164,1345,1423,1512,1592,1876,1882,1927,1984,2169,2325,2429,2511,2735,2765,3213,3289,3366,3418,3591,3599,3825,3976,3977,4374,4586,4819,4993,5084,5331,5366,5426,5487,5489,5631,5746,5821,6613,6771,6832,7082,7211,7239,7344,7548,7859,7904,8458,8502,8568,8571,8652,9275,9413,9428,9596,9621,10066,10845,11013,11136,11257,11954,12259,12276,12390,12…	CALCRL,CD34,CD93,EBF1,EDNRA,ITGB7,NRIP1,SATB1,TMSB10	CALCRL,CD244,CD27,CD34,CD93,CXXC5,EBF1,EDNRA,ERG,FLT3,GEM,GPR56,IL7R,ITGB7,LY86,MEIS1,NRGN,NRIP1,PTPRCAP,SATB1,TMSB10,TSC22D1,ZBTB16
MSigDB Perturbation	YAO_TEMPORAL_RESPONSE_TO_PROGESTERONE_CLUSTER_10	Genes co-regulated in uterus during a time course response to progesterone [PubChem=5994]: SOM cluster 10.	156	0.000445449	1	0.00960571	1.95619	15.3359	30	468	0.0131119	0.0641026	10	67	68	4.41312e+105	44,131,185,217,386,414,427,482,581,610,736,758,871,1050,1098,1284,1372,1374,1395,1396,1401,1418,1536,1616,1633,1877,2045,2322,2342,2469,2522,2598,2758,2764,2804,2843,2845,2982,3136,3773,3777,3792,3969,4090,4183,4266,4854,4863,4872,4983,5229,5239,5245,5298,5314,5406,5412,5456,5798,6124,6177,6191,6261,6311,6582,6628,6639,6794,6868,6878,6922,7050,7210,7300,7786,7862,8116,8411,8638,8687,8710,8847,899…	ATF1,BCKDHB,CACYBP,EIF1B,HNRNPA3,PEX13,SLC30A5,SUMO1,TMEM11,VDAC2	ADK,AP3M1,AP4S1,APMAP,ARCN1,ATF1,BCKDHB,C9orf64,CACYBP,CANX,CCT7,CERS2,CHCHD7,CLDN7,COX17,DAD1,DFNA5,DYNLL1,EDF1,EIF1B,EIF3G,FKBP2,FKBP4,GCSH,GRWD1,HBA1,HBA2,HIAT1,HNRNPA3,HNRNPR,LDHA,MPC2,MRPL40,NSUN2,OSTC,PCNA,PEX13,PEX2,POLR2F,POLR2L,PRDX1,PSMA4,RALA,RANGAP1,RLN1,RPN2,RRBP1,SAC3D1,SARNP,SEC61A1,SERP1,SF3A3,SLC1A4,SLC30A5,SSB,SSRP1,SSU72,SUMO1,TIMM23,TM9SF3,TMED2,TMEM11,UFM1,USO1,VDAC2,WBP5,YIP…
MSigDB Perturbation	FLECHNER_BIOPSY_KIDNEY_TRANSPLANT_OK_VS_DONOR_UP	Genes up-regulated in kidney biopsies from patients with well functioning kidneys more than 1-year post transplant compared to the biopsies from normal living kidney donors.	157	0.000448056	1	0.00960038	1.2685	151.36	192	4619	0.0839161	0.0415674	114	542	547	6,17,18,33,37,42,63,64,65,67,94,96,104,119,122,132,142,151,161,200,212,222,235,236,253,255,265,266,276,302,321,325,336,341,369,383,389,399,408,417,447,449,459,462,474,489,527,528,533,565,584,598,619,620,623,636,647,654,656,662,670,705,711,712,715,744,749,752,766,791,805,823,825,870,889,930,937,958,980,1011,1012,1022,1029,1039,1065,1077,1118,1120,1134,1136,1137,1143,1153,1158,1164,1174,1215,1226,1…	6,17,18,33,37,42,63,64,65,67,94,96,104,119,122,132,142,151,161,200,212,222,235,236,253,255,265,266,276,302,321,325,336,341,369,383,389,399,408,417,447,449,459,462,474,489,527,528,533,565,584,598,619,620,623,636,647,654,656,662,670,705,711,712,715,744,749,752,766,791,805,823,825,870,889,930,937,958,980,1011,1012,1022,1029,1039,1062,1063,1065,1077,1087,1118,1120,1134,1136,1137,1143,1153,1158,1164,1…	ABI1,ACBD3,ACSL4,ACTN1,ACTR2,ADD3,AFF1,AHCYL1,AHR,ANK2,ANK3,APLP2,ARF4,ARHGEF18,ASF1A,ATF2,ATG12,AUH,BBOX1,BBX,CBR4,CD2AP,CD44,CDC42BPA,CDK13,CDK14,CDS1,CITED2,CXCL12,DESI2,DNAJA1,DPYSL2,DYNC1I2,ELOVL5,EVI2B,F2R,F2RL1,FNBP1L,FNDC3A,FPGT,GALC,GCH1,GOT2,H2AFZ,H3F3A,HMGN3,HNRNPC,IDH1,IGF1R,IL6ST,LAMP2,LPGAT1,LUM,MAOA,MARCKS,MED13,MINPP1,MMP7,MORC3,MSN,MYH9,MYOF,NCOA3,NEK7,NRIP1,NUP50,OXA1L,PALLD,PAM…	ABAT,ABI1,ACADSB,ACBD3,ACOT13,ACSL3,ACSL4,ACSM3,ACTA2,ACTG1,ACTN1,ACTR2,ADD3,ADH5,AFF1,AGL,AHCYL1,AHR,AK4,AKR1C3,ALG8,AMD1,ANK2,ANK3,ANP32A,ANXA4,ANXA5,ANXA7,AOC1,AP3D1,AP3S1,APLP2,ARF4,ARF6,ARFGEF1,ARHGEF18,ARID5B,ARPC5,ASF1A,ATF2,ATG12,ATP2A2,ATP6V0E1,ATP6V1A,ATP6V1B2,ATP8A1,AUH,AUTS2,AZIN1,BAMBI,BBOX1,BBX,BCAP31,BEX4,BIRC3,BMP2K,BNIP3,BRD8,BZW1,C11orf58,C1D,C1S,C7,CA12,CALU,CAPZA1,CASP4,CAT,CB…
MSigDB Perturbation	IRITANI_MAD1_TARGETS_UP	Genes up-regulated by overexpression of MAD1 [GeneID=4084] in primary thymocytes from RAG2 [GeneID=5897] knockout mice.	158	0.000451579	1	0.00961464	2.98283	4.35828	13	133	0.00568182	0.0977444	4	13	13	1.31185e+43	131,185,217,356,414,736,871,986,1089,1374,1401,2469,2702,3136,3597,4500,4600,4659,4814,5813,6582,6713,7725,7802,8579,8844,9316,9917,10900,11363,11588,11827,12399,12500,12673,12887,12893,13171,13195,13652,14668,14786,14794,15263,15674,16135,18213,18331,18854,19165,19268,19306,19627,21734,23278,23853,24530,24688,24802,25551,25802,25895,26694,26945,26947,28254,28871,29417,29465,30551,30731,31394,315…	AGO2,MYCN,PIK3R1,TULP4	AGO2,B4GALNT2,CPA3,FAM96B,HSD11B1,LTB,MXD1,MYCN,PIK3R1,SCIN,SLC43A3,TULP4,UGGT1
MSigDB Perturbation	KYNG_DNA_DAMAGE_UP	Genes with GO annotation and up-regulated after DNA damage in cell lines from young donors.	159	0.000465678	1	0.00985247	1.42949	64.3584	92	1964	0.0402098	0.0468432	56	214	222	12,19,131,134,171,178,185,217,219,235,244,276,340,350,369,383,407,408,414,517,544,599,602,653,711,718,723,729,736,748,767,864,865,871,886,948,959,989,1034,1035,1045,1105,1157,1166,1260,1278,1314,1330,1366,1374,1378,1401,1404,1495,1569,1583,1648,1666,1690,1707,1728,1765,1802,1908,1921,1922,1956,1997,2090,2182,2214,2217,2240,2264,2368,2370,2376,2384,2420,2430,2431,2469,2492,2535,2538,2559,2572,2598…	12,19,131,134,171,178,185,217,219,235,244,276,340,350,369,383,407,408,414,517,544,599,602,653,711,718,723,729,736,748,767,864,865,871,886,948,959,989,1034,1035,1045,1105,1157,1166,1252,1260,1278,1314,1330,1366,1374,1378,1401,1404,1474,1495,1532,1569,1583,1648,1663,1666,1690,1707,1728,1765,1802,1832,1908,1921,1922,1956,1995,1997,2056,2090,2182,2214,2217,2233,2240,2264,2368,2370,2376,2384,2420,2428…	AHCY,ATP7A,BAP1,CYB5A,CYP19A1,DSC2,ELF4,EVI2A,GALC,GCLC,GM2A,GTF3C4,HBEGF,HIBADH,HNRNPC,HSF2,INPP5A,ITIH2,KAT6B,KCNK1,LDHD,LIPC,LMO2,LRBA,LRRFIP2,MECOM,MET,MMP7,MYB,MYO5B,NRP2,PDE4DIP,PHF3,PHLDA1,PLCL1,PLD6,PPP3CA,PRLR,PTPRK,PTPRN2,RAB7A,RAB9A,ROPN1L,RPS6KA3,RUFY3,SEC23A,SIRT5,SKAP1,SLC30A5,SLCO2A1,SOX9,SP140,STAT5B,SYK,TFDP2,WNT5A	ABCC1,ADAM11,ADAM12,ADAMTS3,ADSL,AHCY,AKAP6,ALDH8A1,AP1G1,APPBP2,ARNT,ARNT2,ASMTL,ATP6V0A1,ATP6V0B,ATP7A,AVPR1A,BAP1,BCL2L2,BDH2,C14orf2,C1QTNF6,C3AR1,CACNA1I,CCL13,CCL28,CD8A,CEPT1,CHL1,CHRNA7,CHRNE,CKS2,COL17A1,CRABP2,CTDSPL,CTNND1,CXADR,CXCR4,CYB5A,CYBB,CYBRD1,CYP19A1,DAB2,DBT,DCT,DCTD,DDX18,DHRS7,DIS3,DLX4,DNALI1,DOCK2,DSC2,DUSP5,EFNB3,EGFR,EIF4A1,ELF4,EML4,ENPP5,ENTPD1,EPHA1,ERCC5,EVI2A,FADS…
MSigDB Perturbation	DITTMER_PTHLH_TARGETS_DN	Genes down-regulated in MDA-MB-231 cells (breast cancer) after knockdown of PTHLH [GeneID=5744] by RNAi.	160	0.000475355	1	0.00999434	1.82491	19.727	36	602	0.0157343	0.0598007	15	71	72	1.91151e+129	19,115,131,185,217,245,414,558,736,797,836,871,982,1035,1241,1254,1328,1352,1357,1374,1401,1420,1560,1717,1763,1768,1908,2059,2256,2301,2309,2310,2430,2431,2440,2469,2502,2651,2652,2681,2687,2804,2937,3089,3136,3240,3384,3530,3541,3655,4137,4263,4366,4416,4422,4588,4737,4805,4864,5004,5012,5047,5125,5317,5428,5434,5572,5591,5636,5957,6136,6167,6394,6488,6582,6599,6638,7120,7178,7253,7299,7463,761…	ARPC2,ITGA6,LRBA,MAPK6,MYH9,NDUFS4,PIK3R1,RAPGEF2,RGS10,RRAS2,SERPINE1,SP110,TBC1D1,TFDP2,ZDHHC7	ACTG1,ADAMTS1,ALDH7A1,AOX1,ARPC2,BCKDHA,BTNL3,CASP1,CREB1,CUL4A,DFFA,EIF4G1,FAH,FAT1,FBXO7,FERMT2,GLS,HSP90AA1,HSPA2,ITGA6,IVNS1ABP,KDELR2,KIF3B,KISS1,LMNA,LRBA,LRRFIP1,MAP3K7,MAPK6,MCAM,MINK1,MMS19,MRPL34,MRPS14,MT1G,MT1H,MT1X,MT2A,MYH9,NDUFB3,NDUFS4,PANX1,PDHB,PIK3CA,PIK3R1,POLD2,PSMB4,PTK2,RAPGEF2,RGS10,RPL18,RPP30,RRAS2,SAP30,SEC24A,SEMA3A,SERPINE1,SFXN3,SLC22A14,SNX13,SP110,SPEN,SPTLC2,TBC1D…
MSigDB Perturbation	PARK_TRETINOIN_RESPONSE	Genes up-regulated in U937 cells (acute promyelocytic leukemia, APL) by tretinoin (ATRA) [PubChem=444795].	161	0.000477651	1	0.00998024	3.12991	3.83398	12	117	0.00524476	0.102564	8	12	12	70,87,252,396,552,683,685,1201,1370,1609,2163,2282	70,87,252,396,552,606,683,685,1201,1370,1609,1739,2089,2163,2282,2934,3109,3354,3432,3505,3648,3870,4348,4411,4750,5389,5779,6148,7102,7128,7315,7482,7565,7657,8547,9292,9482,9667,10096,10214,11037,11708,13862,14003,14032,14999,15690,16071,16529,16959,17063,17085,17253,17505,19030,19735,19864,21961,22369,22644,24264,24586,24611,26139,27502,27530,29549,29737,30626,31051,31414,31674,32222,32225,322…	MERTK,PIK3CG,PIM1,PLEK,SLA,SLC2A5,SMOX,THBD	ALOX5AP,CEBPE,FGR,MERTK,NDRG1,PIK3CG,PIM1,PLEK,SLA,SLC2A5,SMOX,THBD
MSigDB Perturbation	BENPORATH_ES_2	Set 'Set 'ES exp2': genes overexpressed in human embryonic stem cells according to a meta-analysis of 8 profiling studies.	162	0.000479602	1	0.00995915	2.61105	6.12781	16	187	0.00699301	0.0855615	4	38	39	6,17,42,223,265,342,447,715,744,765,773,1134,1262,1669,2445,2696	6,17,42,223,265,342,447,715,744,765,773,1134,1262,1580,1669,2445,2696,2870,2947,3152,3865,3924,4008,4075,4082,4554,5525,6553,6667,7144,7221,7488,7850,7950,9376,9588,9685,10301,10577,10716,10995,11001,11721,11983,12393,12534,13517,13611,13767,13962,15034,15566,15736,15914,17107,17120,17458,17459,18042,18055,18241,19763,20574,20695,20844,20927,21020,21035,21053,21217,21790,23107,23190,23852,24520,2…	CYP26A1,DNMT3A,HELLS,WSCD1	AEN,CDC25A,CHEK2,CLDN6,CYP26A1,DBNDD1,DNMT3A,DSCC1,DTYMK,EPHA1,EPHX3,ERCC6L,ETV4,GDF3,GJC1,GOLGA7,GPR19,HELLS,HESX1,LIN28A,LPAR4,MCM10,MYBL2,NANOG,NCAPH,ORC1,ORC2,POU5F1,PRDM14,PRKD3,PWP2,RBM4,RRP9,SLC5A6,TDGF1,TXLNG,WSCD1,ZIC3
MSigDB Perturbation	KARLSSON_TGFB1_TARGETS_DN	Genes down-regulated by TGFB1 [GeneID=7040] in MEF cells (embryonic fibroblast) via TGFB1R [GeneID=7046].	163	0.000507544	1	0.0104747	1.42258	65.3742	93	1995	0.0406468	0.0466165	45	204	207	10,21,61,111,131,162,185,187,212,217,219,223,230,255,278,307,336,357,414,417,471,473,510,518,560,580,605,640,650,702,709,736,752,765,778,817,843,871,879,904,1029,1059,1106,1125,1164,1221,1253,1270,1282,1364,1374,1382,1394,1401,1433,1486,1492,1507,1514,1520,1691,1696,1749,1790,1823,1836,1927,1978,2047,2076,2168,2245,2270,2325,2379,2382,2413,2429,2445,2458,2467,2469,2487,2542,2585,2586,2588,2603,26…	10,21,61,111,131,162,185,187,212,217,219,223,230,255,278,307,336,357,414,417,471,473,510,518,560,580,605,640,650,702,709,736,752,765,771,778,817,843,871,879,904,932,1029,1059,1060,1063,1087,1106,1125,1164,1221,1247,1253,1270,1282,1364,1374,1382,1394,1401,1433,1486,1492,1507,1514,1520,1658,1678,1684,1691,1696,1749,1790,1823,1836,1855,1888,1927,1978,2047,2076,2168,2245,2270,2325,2379,2382,2413,2429…	ACAA2,ACTN1,ADD3,ADIPOR2,ADO,ALCAM,ANAPC1,AP3B1,ATPIF1,B3GAT1,BBX,BNIP3L,CD2AP,CTSB,CTSZ,DCN,DNAJA1,DNMT3A,EFNA5,FUT8,H1F0,H3F3A,HMGN2,ITM2B,LAMP2,LY6E,MAOA,MET,NDFIP1,NFIA,NPC2,PIK3R1,RGS8,RIN2,RNF11,SIKE1,SLC39A10,SMARCA2,STARD4,TBCEL,TGM2,USP25,XIAP,ZFP36L1,ZNF395	ACAA2,ACBD4,ACTN1,ADAM10,ADD3,ADIPOR2,ADO,AES,AGAP1,ALAD,ALCAM,ANAPC1,AP3B1,APPL2,ARID5B,ARMCX1,ARNT,ATP6V1F,ATPIF1,AZI2,B3GAT1,BBX,BET1L,BLOC1S1,BNIP3L,BSG,C4B,CCDC80,CCNI,CCNL2,CD2AP,CDKN2C,CELF2,CHP1,CNTNAP1,COL6A1,COPZ2,CRIP1,CST3,CTDSP2,CTNNBIP1,CTSA,CTSB,CTSZ,CXADR,DAB2,DAG1,DBI,DCAF8,DCN,DCTN6,DENND4C,DNAJA1,DNMT3A,DUSP18,DUSP8,EFNA5,EMC2,ENPP4,ENSG00000258465,EPHX1,EZR,F11R,FAM57A,FTH1,FU…
MSigDB Perturbation	LEIN_CEREBELLUM_MARKERS	Top 100 ranked genes most specific to the cerebellum region of adult mouse brain.	164	0.000518063	1	0.0106266	1.78405	21.2999	38	650	0.0166084	0.0584615	17	79	83	1.51131e+128	15,113,128,145,171,174,177,181,210,221,320,332,419,464,510,599,689,731,854,947,953,977,1057,1156,1226,1248,1335,1382,1412,1484,1576,1694,1813,2036,2180,2457,2493,2533,2619,2620,2700,2778,2808,3168,3367,3369,4191,4206,4244,4458,4477,4553,4572,4687,4693,4782,4837,5266,5347,5365,5380,5460,5525,5592,5755,5796,5889,6175,6178,6473,6529,6618,6721,6827,7025,7045,7180,7260,7649,7699,7703,7788,7949,7976,79…	B3GNT5,BTG1,CASQ2,CEP72,CHD7,DHRS3,EXPH5,GDF10,GSAP,HBEGF,ICMT,LIG1,NTN1,PEPD,PKP3,SLC9A3,ZNF521	AFAP1L2,AMOT,ARAP1,ARHGAP5,ARHGEF37,B3GNT5,BTG1,C15orf27,CA7,CASQ2,CBLN3,CEP72,CHD7,CMYA5,CNKSR3,COL18A1,CRTAM,DHRS3,DMD,DNAJC3,EN2,ERC1,ETV4,EXPH5,FBXO24,FEZ2,GABRA6,GDF10,GNG13,GPR63,GSAP,H6PD,HBEGF,HEPACAM,ICMT,IL16,KANK2,KCNT1,KIT,LHX1,LHX5,LIG1,MCC,MMP24,NEK2,NHLH1,NKAIN4,NPR1,NTN1,PAQR6,PCP2,PDP2,PEPD,PHKA1,PKP3,PLXDC1,PQLC1,PREX2,PTPRM,RHOD,RIF1,RNF182,SLC25A18,SLC9A3,SOGA1,SPRY3,SYNE2,SYT…
MSigDB Perturbation	CHOI_ATL_CHRONIC_VS_ACUTE_DN	Genes down-regulated in adult T-cell leukemia (ATL), chronic vs acute clinical condition.	165	0.000538935	1	0.0109877	2.58342	6.19335	16	189	0.00699301	0.0846561	5	17	18	3.72224e+55	37,222,386,482,581,662,766,1022,1077,1143,1344,1530,1633,1643,1661,2342,2477,3050,3512,3734,3739,4146,4168,4217,4548,4803,5724,5818,5985,6539,6703,6772,6890,7241,7792,7830,7835,7893,8167,8482,9137,9273,9838,10189,10458,11659,11686,11804,11813,12271,12778,12947,13617,13734,13986,14544,15049,15149,15299,15358,17481,17501,18447,18954,19647,19693,20001,20569,20758,20845,21093,21622,22937,23435,23563,…	CMTM6,LRRC8D,NCOA3,SERBP1,SUMO1	ANAPC16,ATP6V1A,CGGBP1,CMTM6,CTDSP2,GTF3A,IARS,LBH,LRRC8D,MAT2B,MDH1,NCOA3,PPP1CC,SERBP1,SPTBN1,SUMO1,UBE2E1
MSigDB Perturbation	TORCHIA_TARGETS_OF_EWSR1_FLI1_FUSION_TOP20_DN	Top 20 down-regulated genes in leukemic progenitor cells expressing activated fusion of ESWR1 and FLI1 [GeneID=2130, 2313] compared to normal hematopoetic progenitors.	166	0.000549879	1	0.0111433	2.49415	6.81596	17	208	0.00743007	0.0817308	6	16	18	21,76,136,307,473,650,733,778,859,876,1106,1111,1221,1242,1512,1637,2467	21,76,136,307,473,650,733,778,859,876,1106,1111,1221,1242,1512,1637,2467,3418,4472,4813,5142,5203,5405,6379,6828,7104,7285,8558,8742,8751,8868,8988,9167,9606,10384,10409,10418,10877,11340,11859,11869,12663,13210,13305,13349,14525,14964,15304,15574,15653,15736,15918,16945,17141,17194,17278,17326,17446,17732,18211,18380,18473,18526,18635,18731,19546,19821,20458,20677,20760,20865,21231,21249,22047,2…	CDC42EP3,GALNT7,SLC6A13,SOX4,TGM2,TMSB10	ARHGAP15,CD81,CDC42EP3,CNN3,DOCK10,GALNT7,GRB10,GSTA4,LGALS1,PRKD3,PTGR1,SLC6A13,SMO,SOX4,TGM2,TMSB10
MSigDB Perturbation	SCHAEFFER_PROSTATE_DEVELOPMENT_AND_CANCER_BOX4_DN	Early prostate development genes (down-regulated at 6 hr dihydrotestosterone [PubChem=10635]) which are also down-regulated in localized vs metastatic prostate cancers.	167	0.000559987	1	0.0112802	2.07314	12.059	25	368	0.0109266	0.0679348	9	32	32	18,64,235,253,518,538,663,711,820,1136,1164,1573,1592,1749,1770,1778,1785,1927,2009,2316,2325,2429,2475,2705,2735	18,64,235,253,518,538,663,711,820,1136,1164,1573,1592,1749,1770,1778,1785,1927,2009,2316,2325,2429,2475,2705,2735,2812,2995,3087,3332,3393,3455,3510,3514,3601,3644,3664,3753,3881,4025,4110,4270,4317,4437,4599,4764,5101,5157,5297,5331,5354,5519,5532,5604,5628,5676,5729,5792,5819,5942,6054,6236,6430,6630,6642,6764,6882,7115,7142,7147,7271,7418,7513,7789,7904,8047,8195,8458,8587,9609,9783,9794,9876,…	ELOVL5,GCC2,HNRNPC,IER2,NFIA,NRIP1,SMARCA2,ZNF462,ZNF664	BCLAF1,CANX,CDC37L1,CHD9,CSNK1A1,CTSO,EIF2AK2,EIF3A,ELOVL5,GCC2,HNRNPC,IER2,LRPAP1,MANF,MYO1B,NFIA,NRIP1,PPHLN1,PRPF40A,PSMC6,REST,SFPQ,SMARCA2,SRSF9,SSR1,SYMPK,TMED2,TNRC6B,TOB2,VPS36,ZNF462,ZNF664
MSigDB Perturbation	XU_HGF_TARGETS_INDUCED_BY_AKT1_48HR_UP	Genes up-regulated in DU-145 cells (prostate cancer) in the absence but not in the presence of a dominant negative form of AKT1 [GeneID=207] upon exposure to HGF [GeneID=3082] for 48 h.	168	0.000565018	1	0.0113138	3.50766	2.85091	10	87	0.00437063	0.114943	3	12	14	2.13075e+33	21,307,473,650,778,1039,1106,1221,2467,2486,3518,3719,4332,4472,4572,5590,5664,5717,6407,6641,6817,7245,7368,7485,7633,8212,8603,9606,9890,10514,11775,13719,13970,16574,17141,18503,19073,19294,19428,20606,20955,22149,24616,24768,26598,27957,28880,28940,31676,32757,33183,33384,34017,37860,40705,40908,43854,44097,44390,44399,45084,45313,45411,46770,46933,47182,47249,48392,49014,49100,51913,54551,54…	AMPD3,F2RL1,TGM2	AMPD3,ECM1,EPHB2,F2RL1,FOXD1,LTBP2,PLAUR,SPSB1,TGM2,THEMIS2,TNIP1,WNT4
MSigDB Perturbation	AMIT_EGF_RESPONSE_240_HELA	Genes whose expression peaked at 240 min after stimulation of HeLa cells with EGF [GeneID=1950].	169	0.000627948	1	0.0124995	1.78094	20.7756	37	634	0.0161713	0.0583596	18	55	60	73,96,110,119,153,195,315,420,499,504,527,530,628,675,677,825,866,1190,1258,1272,1274,1608,1727,1852,1910,2088,2141,2165,2264,2267,2299,2484,2509,2527,2607,2637,2669	73,96,110,119,153,195,315,420,499,504,527,530,628,675,677,825,830,866,1190,1258,1272,1274,1608,1727,1818,1852,1910,2088,2138,2141,2165,2264,2267,2299,2484,2509,2527,2607,2637,2669,2934,3004,3027,3286,3298,3329,3422,3423,3520,3536,3540,3606,3668,3798,3855,3861,3870,3957,3976,4078,4087,4097,4179,4274,4361,4550,4577,4678,4774,4812,4832,4949,4956,4987,5190,5247,5288,5305,5520,5521,5742,5779,5800,5899…	AKAP12,CD55,DKK1,EHBP1L1,FGF2,GRAMD3,PDLIM5,PPAP2B,RBMS1,RYK,SH2B3,SOX13,SPRED2,TBX3,THBS1,TOP1,VAV2,YY1	AKAP12,ARF6,ARPC4,BCL3,CAPRIN2,CD55,CDK17,CREM,DKK1,DLGAP4,DNMBP,EHBP1L1,EHD1,ELL2,EPN2,EZR,FGF2,FHL3,GFPT2,GRAMD3,IL7R,ING2,LETM1,LRP8,MAT2A,NDRG1,NUP160,PCDH7,PDLIM5,PLK2,PPAP2B,RBMS1,RGS2,RPS6KB2,RYK,SDC4,SH2B3,SHB,SLC7A11,SOX13,SPRED2,SRPR,TBX3,THBS1,THOC1,TM4SF1,TNFRSF1A,TOP1,TPM4,TUBGCP2,TXNRD1,VAV2,YKT6,YY1,ZEB1
MSigDB Perturbation	SCHMIDT_POR_TARGETS_IN_LIMB_BUD_UP	Genes up-regulated in E12.5 forelimb buds with POR [GeneID=5447] knockout.	170	0.000646493	1	0.012793	2.45868	6.91427	17	211	0.00743007	0.0805687	6	26	26	6,17,42,49,162,265,399,447,560,709,715,744,1116,1134,1262,1978,2307	6,17,42,49,162,265,399,447,560,709,715,744,1116,1134,1262,1978,2307,2778,2823,3114,3152,3341,4067,4128,4477,4667,4670,5056,5670,6170,6381,6514,6827,6851,6858,7427,7488,7585,7950,8157,8469,9376,9509,9771,10035,10061,10252,10455,10716,10823,10886,10995,11763,11916,12815,12857,13192,13337,14062,14372,14607,15278,15798,16708,17387,17498,18133,19247,19273,19322,19523,20181,20228,20286,20622,21116,2179…	CYP26A1,FDFT1,FOXC1,HMGCS1,STARD4,ZMAT4	AASDH,ACAT2,ACLY,CYP26A1,CYP51A1,DHCR7,ELOVL6,FDFT1,FDPS,FGL1,FOXC1,HMGCS1,IDI1,INSIG1,LDLR,LSS,MSMO1,MVD,MVK,NSDHL,SC5D,SQLE,SREBF2,STARD4,TM7SF2,ZMAT4
MSigDB Perturbation	VERHAAK_AML_WITH_NPM1_MUTATED_UP	Genes up-regulated in acute myeloid leukemia (AML) patients with mutated NPM1 [GeneID=4869].	171	0.000694472	1	0.013662	1.45851	53.4791	78	1632	0.0340909	0.0477941	49	174	194	34,45,49,88,110,248,252,300,337,401,406,432,434,457,461,499,504,544,562,574,583,584,615,677,718,734,800,829,912,922,978,988,1009,1013,1061,1097,1105,1118,1122,1207,1217,1258,1286,1288,1290,1300,1305,1336,1339,1392,1431,1450,1493,1556,1572,1609,1626,1705,1777,1802,1898,1910,1919,1920,1926,2040,2055,2124,2125,2175,2201,2282,2307,2393,2401,2409,2479,2716	34,45,49,88,110,248,252,300,337,401,406,432,434,457,461,499,504,519,544,562,574,583,584,615,677,718,734,800,829,845,912,922,934,978,988,1009,1013,1061,1062,1097,1105,1118,1122,1207,1217,1258,1286,1288,1290,1300,1305,1336,1339,1380,1392,1431,1450,1493,1556,1572,1609,1626,1705,1771,1777,1802,1898,1910,1919,1920,1926,1963,2040,2055,2124,2125,2175,2201,2282,2307,2330,2393,2401,2409,2436,2479,2638,271…	ABHD2,ACSL1,ADCY2,AQP9,BCL6,CCL20,CCR1,CHST15,CTSD,DEFB1,DPEP2,EMR1,FBP1,FOXC1,GCH1,GDF15,GNS,HCAR3,HIP1,HOXA4,HOXA5,IER3,IL1B,LAPTM4B,LILRA3,LILRA5,LILRB2,LILRB3,LTBP1,MAFB,MARCKS,MCTP1,NAMPT,PHKA2,PHLDA1,PLA2G4A,PLEK,RASGRP3,RUNX1,SEPP1,SLC2A6,SMC4,SMCO4,SNCAIP,SNX10,TBXAS1,THBS1,TNFAIP3,TRIB1	ABCC4,ABHD2,ACSL1,ADCY2,AIM2,AKR1C2,APOBEC3A,AQP9,ARHGAP22,BASP1,BCL2A1,BCL6,C1QA,C1QB,C2,C3AR1,C5AR1,CAMK1,CARD9,CASP1,CAST,CAT,CCL1,CCL20,CCL23,CCL4,CCR1,CD14,CD163,CD300C,CD36,CD86,CHST15,CLU,COL4A5,CPVL,CTSD,CTSG,CTSL,CX3CR1,CXCL10,CXCL2,CXCL3,CYP1B1,DEFB1,DMXL2,DPEP2,EMR1,EPB41L3,EREG,ETS2,FBP1,FCGR3B,FCN1,FGL2,FGR,FOXC1,FPR1,FTO,G0S2,GCH1,GDF15,GGT1,GNS,HCAR3,HCK,HIP1,HIST1H1C,HIST1H2BC,HIS…
MSigDB Perturbation	TORCHIA_TARGETS_OF_EWSR1_FLI1_FUSION_UP	Genes up-regulated in leukemic progenitor cells expressing activated fusion of ESWR1 and FLI1 [GeneID=2130, 2313] compared to normal hematopoetic progenitors.	172	0.000702306	1	0.0137358	1.36366	81.3983	111	2484	0.048514	0.044686	62	249	252	11,37,114,119,126,191,195,222,272,290,320,337,351,364,375,401,412,470,488,509,520,526,552,560,562,572,633,635,643,654,655,659,675,698,699,709,738,766,780,789,795,806,824,825,842,866,867,887,1022,1039,1061,1070,1077,1113,1123,1143,1159,1180,1184,1211,1225,1274,1394,1405,1419,1422,1431,1491,1522,1539,1560,1567,1575,1626,1646,1668,1691,1696,1743,1766,1795,1860,1898,1939,1941,1999,2025,2048,2144,2163…	11,37,114,119,126,191,195,222,272,290,320,337,351,364,375,401,412,470,488,509,520,526,552,560,562,572,633,635,643,654,655,659,675,698,699,709,738,766,780,789,795,806,824,825,842,866,867,887,925,960,979,1022,1039,1061,1070,1077,1113,1123,1143,1159,1180,1184,1211,1225,1235,1274,1394,1405,1419,1422,1424,1431,1469,1491,1522,1539,1560,1567,1575,1626,1645,1646,1668,1691,1696,1739,1743,1766,1774,1795,18…	ACAT1,ACVR1B,ADCY9,ARAP2,ARHGEF2,ARL4D,ATP2A3,BAZ2B,BBX,BCAS3,C16orf54,C3orf80,CA13,CCR9,COL5A1,DCLK2,DDIT4,DUSP10,F2R,FAAH,FAM174B,FAM213A,FDFT1,FNBP1L,FRMD4A,FRY,GNA14,GNAQ,GOLPH3,GRAMD3,GRK5,ITGB7,KDM5B,KLF6,LYST,MPPED2,MR1,MTMR12,NCOA3,OTUB2,PCYT1B,PDLIM5,PKP3,PLEK2,PRKCE,PRKCH,PRKCQ,RUNX1,SMIM3,SMOX,SPHK1,ST8SIA4,STIM2,TBCEL,TECPR2,TGFA,TLDC1,TLE3,TRIM10,UNC5CL,VOPP1,ZMIZ1	ACADSB,ACAT1,ACVR1B,ADCY9,AKT3,ALDH5A1,ALOX5,ANKRD27,APOA1,APOBEC1,APOE,ARAP2,AREL1,ARHGEF2,ARL2BP,ARL4D,ARSA,ASB1,ATP2A3,BAZ2B,BBC3,BBX,BCAS3,BEX4,BOLL,BZRAP1,C16orf54,C1QTNF4,C3orf80,C7orf60,C8orf44-SGK3,CA13,CA8,CACNA1C,CAMK1D,CAP2,CCR9,CD5L,CDA,CDC42EP5,CDKN2B,CDKN2C,CISH,CLCA1,CMAS,COL5A1,CPLX2,CPNE5,CPNE7,CPT1C,CREM,CTTN,CYTIP,DCLK2,DCXR,DDIT4,DEF6,DERL1,DIAPH1,DIP2C,DNAJA4,DOCK11,DUSP10,EM…
MSigDB Perturbation	SASSON_RESPONSE_TO_GONADOTROPHINS_DN	Genes down-regulated in primary granulosa cells after stimulation with LH or FSH gonadotrophic hormones for 24 h.	173	0.000722309	1	0.0140454	1.65538	27.7882	46	848	0.0201049	0.0542453	19	86	87	15,41,110,113,122,128,144,145,174,210,270,332,347,419,461,499,504,625,677,848,978,1253,1260,1324,1328,1450,1518,1569,1576,1683,1719,1790,1852,1867,1886,1910,1915,2175,2320,2339,2356,2463,2579,2644,2653,2654	15,41,110,113,122,128,144,145,174,210,270,332,347,419,461,499,504,625,677,848,978,1141,1253,1260,1324,1328,1450,1518,1569,1576,1587,1683,1719,1790,1852,1855,1867,1886,1891,1910,1915,1958,2175,2247,2320,2335,2339,2356,2463,2579,2594,2644,2653,2654,2766,2772,2853,3053,3061,3077,3114,3286,3400,3411,3434,3471,3532,3683,3725,3798,3813,3825,3843,4031,4087,4166,4187,4216,4223,4267,4338,4478,4522,4573,47…	ACP5,ACTN1,ADCY9,AKAP12,ATP9A,CDK14,DHRS3,ITGB5,MAP4K4,MAPK6,MAPRE2,NPC2,PIK3CD,PLCL1,PPP2R5C,PTPN1,STK17A,THBS1,TRIB1	ABLIM1,ACP5,ACTA1,ACTA2,ACTG2,ACTN1,ADCY7,ADCY9,AKAP12,ARHGAP1,ARL4C,ARL6IP5,ARPC4,ATP2A2,ATP9A,AXL,BECN1,CAP2,CAPZA1,CARD10,CASP4,CDK14,CDKN1C,CFLAR,CHUK,CTNND1,CYFIP2,DAB2,DAPK1,DHRS3,DUSP14,DYRK3,ENSG00000005189,EZR,FLNC,GBP1,GEM,HSD17B1,ILK,ITGA3,ITGB5,KIDINS220,KRT18,MAP2K3,MAP4K4,MAPK14,MAPK6,MAPRE2,MBD2,NPC2,PAWR,PDLIM3,PI4K2A,PIK3CD,PLCL1,PMAIP1,PPP2R5C,PPP3R1,PRKD1,PTPN1,PTPRE,RAB33B,RAB…
MSigDB Perturbation	HAHTOLA_MYCOSIS_FUNGOIDES_CD4_UP	Genes up-regulated in T helper cells (defines as CD4+) isolated from patients with mucosis fungoides compared to those from normal control donors.	174	0.000747354	1	0.0144488	1.74907	21.7259	38	663	0.0166084	0.0573152	24	62	62	60,72,84,171,356,382,461,483,527,574,583,599,660,699,700,749,951,961,978,986,1009,1122,1180,1207,1339,1450,1808,1869,1986,1997,2032,2065,2172,2175,2266,2486,2628,2699	60,72,84,171,356,382,461,483,527,574,583,599,660,699,700,749,826,951,961,978,986,1009,1115,1122,1180,1207,1247,1339,1450,1808,1869,1986,1997,2032,2065,2172,2175,2266,2268,2332,2486,2628,2699,2991,3025,3027,3028,3040,3155,3188,3366,3381,3400,3450,3532,3653,3712,3725,3762,3771,3843,3861,3862,3958,4061,4088,4306,4331,4357,4596,4684,4689,4814,4819,4835,4846,4875,4922,5068,5132,5138,5224,5292,5311,545…	ACTR2,ADM,ATF3,CDKN1A,EMC3,FAM49A,FUCA1,GM2A,HBEGF,IER3,IL1B,KLF4,KLF6,LILRA5,MCTP1,MS4A4A,NLRP3,PFKFB3,PRKAR1A,RAB20,RIPK2,TMEM127,TRIB1,WIPI1	ABHD5,ACTR2,ADM,ARPC1A,ATF3,BST2,BTG2,CCL4,CDKN1A,CEBPD,CHPT1,CXCL1,CXCL2,CXCL3,EGR1,EGR2,EMC3,ENC1,EREG,ETS2,FAM49A,FBN2,FUCA1,G0S2,GLIPR1,GLRX,GLUL,GM2A,HBEGF,HIST2H2BE,IER3,IL1B,IL8,KLF4,KLF6,KYNU,LILRA5,MANBA,MAPK14,MCTP1,MS4A4A,NEU1,NLRP3,NUP214,PADI2,PFKFB3,PLAUR,PPP1R15A,PRKAR1A,PTGS2,RAB20,RHOB,RIPK2,RPS11,SLC16A6,SOD2,SULT1A2,TMEM127,TRIB1,VNN1,WIPI1,ZNF185
MSigDB Perturbation	LEE_LIVER_CANCER	Genes down-regulated in tumor compared to non-tumor liver samples from patients with hepatocellular carcinoma (HCC).	175	0.000797668	1	0.0153335	2.41294	7.04534	17	215	0.00743007	0.0790698	8	40	46	3.31031e+56	33,103,134,153,234,345,420,442,719,833,1149,1870,1973,2088,2121,2396,2484,2607,3323,3366,3546,3583,4029,4264,4451,4555,4676,4758,4819,5045,5288,5467,5520,5546,5865,6960,7204,7222,7432,7504,7702,7795,7907,7973,8035,8258,8568,9250,9380,9545,9812,10258,10313,11051,11124,11298,11790,12228,12370,12908,13196,13485,13504,13647,14139,14149,14788,14885,14992,15545,15702,15869,16202,17331,17771,18466,18514…	ADH1B,ADRA1A,FAM20C,IDNK,LDHD,PEMT,PPAP2B,RCAN1	ACAA1,ACADS,ADH1B,ADRA1A,APOF,C6,C8A,C8B,CD4,CETN2,CIDEB,CYP2C8,CYP2E1,DMGDH,DNASE1L3,ETS2,FAM20C,FCN1,FETUB,HPX,IDNK,ITIH4,LCAT,LDHD,LPA,NDRG2,PEMT,PLG,PPAP2B,RCAN1,RSPO3,RXRB,SLC22A1,SLC22A3,SLC28A1,SLCO1B3,TMED8,TMEM27,TTR,UROC1
MSigDB Perturbation	YANG_MUC2_TARGETS_DUODENUM_6MO_UP	Genes up-regulated in duodenum of 6 month old MUC2 [GeneID=4583] knockout mice.	176	0.000801607	1	0.0153216	4.54503	1.54015	7	47	0.00305944	0.148936	5	9	10	9.73838e+23	97,383,803,1190,1690,2185,2527,2818,3704,4825,6322,7058,8824,8979,10695,11161,12461,12793,13166,14317,14810,15805,16332,21469,30243,36196,44112,45832,45833,46663,47618,49923,52272,52273,52427,58099,58100,58101,58102,58103,58104,58105,58106,61776,68942,69108,69379	GSR,MBL2,MMP7,PLA2G2A,PLA2G5	CCL28,GPX2,GSR,LCN2,MBL2,MMP7,PLA2G2A,PLA2G5,RETNLB
MSigDB Perturbation	VALK_AML_WITH_CEBPA	Genes that best predicted acute myeloid leukemia (AML) with mutations in CEBPA [GeneID=1050].	177	0.000812685	1	0.0154456	1.98855	13.0748	26	399	0.0113636	0.0651629	8	33	35	10,89,187,267,276,461,514,640,652,666,702,808,904,971,978,1059,1230,1404,1450,1921,1929,2175,2295,2366,2462,2535	10,89,187,267,276,461,514,611,640,652,666,702,808,904,971,978,1059,1230,1404,1450,1921,1929,2175,2295,2366,2462,2535,3212,3347,3400,3487,3532,3624,3725,3736,3843,4459,4465,4578,4822,4825,4840,4846,4852,4871,5009,5034,5062,5076,5224,5225,5242,5287,5333,6020,6065,6129,6137,6167,6296,6376,6467,6768,6810,6898,7058,7121,7363,7641,7699,7726,7910,8002,8006,8237,8431,8515,8589,8672,8973,9028,9054,9110,91…	ARHGEF3,CD38,CEACAM8,GALC,LTF,NDFIP1,SEL1L3,TRIB1	ARHGEF3,ATN1,B4GALT6,BASP1,CAMP,CD38,CD7,CEACAM8,CEBPA,CTNNA1,DLC1,GALC,GNA12,HOXB2,HPGDS,HSPB1,IGF2BP2,IGLL1,ITM2A,LCN2,LTF,MEST,MMP8,NDFIP1,PRR5L,SEL1L3,SFXN3,SLC16A1,SUCLG2,TBL1X,TNS3,TRIB1,TUBB6
MSigDB Perturbation	RODRIGUES_THYROID_CARCINOMA_DN	Genes down-regulated in poorly differentiated thyroid carcinoma (PDTC) compared to anaplastic thyroid carcinoma (ATC).	178	0.00082098	1	0.0155156	1.58411	33.4572	53	1021	0.0231643	0.0519099	24	75	75	31,38,76,110,111,148,252,364,396,403,449,493,499,504,586,636,677,705,732,743,912,1125,1170,1219,1242,1282,1323,1364,1389,1394,1492,1570,1610,1621,1637,1779,1910,2090,2130,2151,2216,2263,2282,2297,2337,2350,2376,2487,2497,2574,2590,2609,2718	31,38,76,110,111,148,252,364,396,403,449,493,499,504,586,636,677,705,732,743,912,1107,1125,1170,1219,1242,1282,1323,1364,1389,1394,1434,1492,1570,1610,1621,1637,1779,1786,1841,1910,2090,2093,2130,2151,2216,2248,2263,2282,2297,2337,2350,2376,2487,2497,2532,2574,2590,2609,2658,2718,2747,2829,2854,2866,2874,2879,2899,3007,3113,3159,3208,3276,3286,3347,3431,3510,3707,3746,3798,3801,3850,3925,3994,408…	ALCAM,ANK3,ARHGEF7,BBX,CD44,CDC42EP3,DCBLD2,DUSP10,EFNA5,HIPK2,HIVEP2,IRF1,ITGB8,KANSL1,L3MBTL1,NAMPT,PGPEP1,PTPRK,SRGN,TAB2,THBD,THBS1,UGCG,ZMYM2	ALCAM,AMIGO2,ANK3,ANKRD28,AREG,AREGB,ARHGAP29,ARHGAP35,ARHGEF7,ATXN1,BBC3,BBX,BNC2,CD44,CDC42EP3,CDK6,CLDN1,COL8A1,CREB5,CXCL1,DCBLD2,DICER1,DMD,DUSP10,EFNA5,F2RL2,FN1,GMEB2,HIPK2,HIVEP2,IGF2BP2,IRF1,ITGB8,KANSL1,KATNBL1,KCNMA1,L3MBTL1,LIF,MAP2,MORF4L2,MYO1D,NABP1,NAMPT,PAX8,PCBP2,PGPEP1,PHLDB2,PLCB1,PLEC,PMEPA1,PPP1R13L,PTPRK,QKI,RIT1,RNF213,ROBO1,RSF1,S100A10,S100A2,SAMD9,SHANK2,SLIT2,SRGN,SYTL…
MSigDB Perturbation	DING_LUNG_CANCER_BY_MUTATION_RATE	The lung adenocarcinoma TSP (tumor sequencing project) genes mutations in which show positive correlation with the higher overall mutation rate.	179	0.00083986	1	0.0157837	2.40177	7.07811	17	216	0.00743007	0.0787037	10	19	20	2.80358e+61	280,358,480,621,821,962,1040,1196,1216,1288,1339,1356,1682,2144,2196,2384,2451,2591,2948,3676,3908,3948,4673,4979,5132,5610,5634,5790,5801,6197,6473,8072,8077,8098,8203,8439,8826,9000,9180,9801,10310,10448,10761,10844,11442,11448,11741,11764,12005,12918,13194,13246,13445,13844,14718,14752,14790,14854,14941,15295,15802,16485,16556,16791,16874,16937,17034,17211,17581,17904,18481,18634,18896,19083,1…	ACVRL1,DDR1,LRP1B,MAST4,MYB,NTRK2,PTPRD,PTPRG,ROBO2,VAV1	ACVRL1,DDR1,FGFR4,IRS1,LMTK3,LRP1B,MAST4,MYB,NTRK2,PDGFRA,PIK3C2G,PRKDC,PTPRD,PTPRG,ROBO2,SMG1,TP53,TYK2,VAV1
MSigDB Perturbation	FIGUEROA_AML_METHYLATION_CLUSTER_5_UP	Cluster 5 of aberrantly hypermethylated genes in blasts from AML (acute myeloid leukemia) patients.	180	0.000858232	1	0.0160394	3.10817	3.53906	11	108	0.00480769	0.101852	3	11	11	4.01484e+38	40,148,403,493,1219,1353,1389,1765,1894,2118,2151,2766,2878,3061,3308,3442,3729,3848,4533,4768,5320,5495,5946,6812,7408,7583,7746,7828,8657,8770,9078,9143,9194,10021,12464,12995,14592,14648,14958,15508,16420,16521,16658,16923,17949,18748,19643,20068,20159,20772,20829,21592,22761,23128,24585,24787,25367,25511,25898,26794,26808,27340,27605,31500,32076,32470,33149,33336,35775,36111,36247,36422,37015…	GPR126,GTF2A1,NRP2	CANT1,CRHBP,GPR126,GTF2A1,KRT81,NRP2,PABPN1,PIAS2,PMAIP1,TIGD3,ZNF667
MSigDB Perturbation	KIM_WT1_TARGETS_12HR_UP	Genes up-regulated in UB27 cells (osteosarcoma) at 12 hr after inducing the expression of a mutated form of WT1 [GeneID=7490].	181	0.000871155	1	0.016191	1.45048	53.0859	77	1620	0.0336538	0.0475309	41	153	159	6,17,41,42,54,76,171,201,214,244,258,265,290,299,339,351,356,371,386,447,482,509,581,599,608,615,715,721,744,780,912,936,973,986,1032,1070,1100,1134,1143,1153,1154,1157,1159,1241,1242,1262,1278,1290,1339,1432,1443,1505,1518,1608,1629,1631,1633,1637,1649,1668,1761,1836,1843,1939,2133,2218,2257,2272,2278,2299,2342,2351,2477,2486,2648,2653,2693	6,17,41,42,54,76,171,201,214,244,258,265,290,299,339,351,356,371,386,447,482,509,581,599,608,615,715,721,744,780,862,912,932,936,973,986,1032,1060,1070,1100,1134,1143,1153,1154,1157,1159,1168,1235,1241,1242,1252,1262,1278,1290,1339,1340,1432,1443,1474,1505,1518,1538,1608,1629,1631,1633,1637,1649,1668,1761,1781,1784,1836,1843,1939,1954,2023,2052,2101,2133,2150,2218,2257,2272,2278,2299,2342,2351,24…	ACSL1,ADM,ATP2B4,ATP9A,CDC42EP3,CHRNA1,CSF1,DDIT4,DDR1,ENDOD1,FGF1,FZD7,GDF15,GPR183,HBEGF,ITGB5,KCNK1,KIF5B,LGR4,MED13L,MYCN,MYOF,PLEKHO1,PPP3CA,PRKCH,RHOQ,SEPT9,SERPINE1,SLC10A3,SMAD3,SNAI2,SOX9,ST8SIA1,TBC1D2,TBX3,TLE3,TRIB2,UBE2J1,ZMIZ1,ZMYND8,ZNF395	AAK1,ABAT,ACSL1,ADM,ADORA1,AMPD2,AQP1,AREG,AREGB,ATP1B1,ATP2B4,ATP9A,BAK1,BHLHE41,BLCAP,C1orf116,CA12,CALCOCO1,CASK,CDC42EP3,CDC42EP4,CHRNA1,COPB1,CREB3L1,CREB3L2,CRY1,CS,CSDC2,CSF1,CSPG4,CX3CL1,CXCL14,DAB2,DDIT4,DDR1,DLGAP5,DNAJB1,DOK4,ENDOD1,ENO2,EPOR,EPS8,FAM65A,FERMT2,FGF1,FGFR1,FGFR3,FHOD1,FZD7,GDF15,GFPT1,GGT1,GLI2,GPR183,GPR56,GRB10,HBEGF,HEG1,HHLA3,HNRNPL,HSPA12A,HSPA1B,HSPA6,HSPH1,HTRA1,…
MSigDB Perturbation	MARSON_BOUND_BY_FOXP3_UNSTIMULATED	Genes with promoters bound by FOXP3 [GeneID=50943] in unstimulated hybridoma cells.	182	0.00087137	1	0.016106	1.17944	275.555	325	8409	0.142045	0.0386491	209	1139	1195	10,12,15,31,37,43,48,49,53,64,67,81,113,122,128,134,141,144,145,151,161,164,174,187,189,208,210,220,222,226,235,252,255,258,261,270,275,277,279,290,299,326,332,343,350,361,364,371,378,386,388,392,419,428,435,454,459,463,472,474,481,482,492,503,507,509,515,520,527,533,536,537,543,544,545,558,567,581,586,593,608,620,623,624,630,635,640,661,679,680,692,701,702,704,718,721,738,749,751,755,757,766,767…	10,12,15,31,37,43,48,49,53,64,67,81,113,122,128,134,141,144,145,151,161,164,174,187,189,208,210,220,222,226,235,252,255,258,261,270,275,277,279,290,299,326,332,343,350,361,364,371,378,386,388,392,419,428,435,454,459,463,472,474,477,481,482,492,503,507,509,515,520,527,533,536,537,543,544,545,558,567,581,586,593,608,620,623,624,630,635,640,661,679,680,688,692,701,702,704,718,721,738,745,749,751,755…
8,44541,44552,44565,44567,44569,44577,44602,44605,44619,44620,44633,44636,44647,44654,44659,44660,44663,44668,44679,44683,44689,44694,44702,44707,44708,44715,44718,44719,44736,44740,44743,44744,44748,44755,44757,44760,44770,44771,44778,44786,44794,44797,44807,44809,44815,44825,44840,44852,44868,44875,44906,44910,44912,44914,44915,44919,44941,44956,44985,44989,45007,45016,45023,45025,45037,45048,4…	ABHD2,ACAT1,ACSL4,ACTR2,ACTR3,ACTRT3,ADCK3,ADORA2A,AGO2,APEX2,APLF,APLP2,AQP9,ARHGAP12,ARHGEF6,ARID1A,ARID5A,ARL15,ARL4A,ARL4D,ARL6IP6,ARPP21,ASCC1,ASF1A,ASUN,ATG12,ATP2A1,BLOC1S5,BSPRY,C10orf54,C9orf123,CAMK2D,CASC5,CCND2,CD53,CDC27,CDK19,CITED2,CMTM6,COX20,CPD,CPSF2,CTGF,CXCR6,DAP,DCLRE1A,DCLRE1C,DDB2,DDIT4,DEGS2,DENND6A,DHRS3,DNAJB12,DNAJB6,DUSP10,DUSP6,EEA1,EIF1,EIF2AK3,EIF4EBP2,ELOVL5,ENSG00…	ABCA7,ABCB6,ABHD12,ABHD2,ABHD8,ABT1,ACAD8,ACAT1,ACBD5,ACSL4,ACTG1,ACTR2,ACTR3,ACTRT3,ADCK3,ADD1,ADORA2A,AGGF1,AGO2,AIMP2,AJUBA,AK2,AKIRIN1,AKT1S1,ALDH3A2,ALG9,ALYREF,AMBRA1,AMDHD1,AMICA1,AMPH,AMZ2,ANAPC16,ANAPC5,ANKMY2,ANKRD13C,ANKZF1,ANXA7,AOX1,AP2A2,AP4B1,AP4M1,APEX2,APLF,APLP2,AQP11,AQP9,ARCN1,ARF6,ARG2,ARHGAP1,ARHGAP10,ARHGAP11A,ARHGAP12,ARHGAP15,ARHGDIB,ARHGEF12,ARHGEF6,ARID1A,ARID3B,ARID5A,…
MSigDB Perturbation	LIU_PROSTATE_CANCER_DN	Genes down-regulated in prostate cancer samples.	183	0.0008833	1	0.0162373	1.27343	131.142	167	4002	0.0729895	0.0417291	94	440	453	6,7,12,17,42,47,76,83,84,94,96,98,131,146,153,154,162,185,188,190,217,219,243,245,255,265,278,284,289,310,325,333,348,362,386,389,414,420,447,471,482,495,501,525,543,544,560,572,575,581,585,589,592,597,643,656,684,691,701,709,715,718,736,744,781,786,834,835,856,861,871,936,958,961,984,1002,1011,1013,1016,1061,1134,1147,1154,1172,1242,1260,1262,1264,1293,1305,1311,1324,1336,1350,1363,1374,1401,141…	6,7,12,17,42,47,76,83,84,94,96,98,131,146,153,154,162,185,188,190,217,219,243,245,255,265,278,284,289,310,325,333,348,362,386,389,414,420,438,447,471,482,495,501,525,543,544,560,572,575,581,585,589,592,597,643,656,684,691,701,709,715,718,724,736,744,771,781,786,830,834,835,856,861,871,936,958,960,961,984,1002,1011,1013,1016,1061,1063,1117,1134,1141,1144,1147,1154,1172,1189,1242,1260,1262,1264,126…	ACAA2,ADCY4,ADCY9,AKAP12,ANK2,ANKDD1A,ANO1,ARHGAP23,ATP2B4,BCL2,C9orf3,CAV1,CCND2,CDC42EP3,CHN1,CLIC6,COL4A2,COL5A1,CRISPLD2,CSRP1,CTSB,CXCL17,CYS1,DDB2,DSC3,DSE,DTNA,ECHDC1,EHD2,EPAS1,FGFR2,FLRT3,FOXF1,FZD7,GJA1,GPR155,GRK5,H3F3A,ITGA8,ITGA9,KIRREL,KITLG,KLF11,KRT17,LAPTM4B,LPAR1,LTBP1,LYST,MAP1B,MECOM,MET,METTL7A,MINOS1-NBL1,MR1,MRC2,MRVI1,MSRB3,MUC4,MYOF,NEURL1B,NHS,NTN4,PALLD,PARP6,PHLDA1,PIK…	ABCC3,ACAA2,ACACB,ACKR3,ACOX2,ACTA2,ACTG2,ADAMTS5,ADCY4,ADCY9,AEBP1,AHNAK2,AJUBA,AKAP12,AKR1B1,ALDH2,ALDH3A2,ANGPTL1,ANGPTL2,ANK2,ANKDD1A,ANO1,ANXA2,AOC1,AOC3,AQP3,ARHGAP23,ARHGEF40,ARL10,ARMCX4,ATP1A2,ATP2B4,BCL2,BDH2,BEND5,BNIP2,BTG3,BTN2A1,C1QTNF1,C1R,C1S,C2orf40,C2orf88,C9orf3,CACHD1,CALD1,CAPG,CASP1,CAV1,CAV2,CCDC136,CCDC50,CCK,CCND2,CD248,CDC42EP3,CEACAM6,CELSR2,CERK,CFD,CFL2,CHN1,CHRDL1,CH…
MSigDB Perturbation	CREIGHTON_ENDOCRINE_THERAPY_RESISTANCE_3	The 'group 3 set' of genes associated with acquired endocrine therapy resistance in breast tumors expressing ESR1 and ERBB2 [GeneID=2099;2064].	184	0.000890105	1	0.0162734	1.21014	209.066	253	6380	0.110577	0.0396552	173	661	673	16,33,47,49,51,59,67,74,76,80,81,92,96,101,106,107,111,117,119,120,121,129,155,162,183,195,207,208,249,252,255,260,261,262,268,291,300,309,340,347,351,356,367,377,380,382,390,394,417,449,451,459,462,472,475,487,505,510,520,532,540,546,560,572,597,602,613,615,619,620,625,628,630,651,655,674,675,701,709,741,748,749,756,767,768,780,793,795,800,808,817,824,825,856,864,866,869,875,876,899,912,922,935,…	16,33,47,49,51,59,67,74,76,80,81,92,96,101,106,107,111,117,119,120,121,129,155,162,183,195,207,208,249,252,255,260,261,262,268,291,300,309,340,347,351,356,367,377,380,382,390,394,417,449,451,459,462,472,475,487,505,510,520,532,540,546,560,572,597,602,613,615,619,620,625,628,630,651,655,674,675,701,709,730,741,748,749,756,767,768,780,793,795,800,808,817,824,825,826,853,856,863,864,866,869,875,876,…
1229,61230,61231,61232,61233,61234,61247,61297,61319,61320,61321,61322,61353,61354,61355,61356,61357,61358,61359,61399,61404,61405,61422,61435,61436,61437,61438,61439,61458,61459,61460,61493,61494,61495,61496,61497,61498,61546,61580,61581,61582,61598,61662,61746,61830,61840,61848,61865,61889,61890,61909,61910,61911,61912,61981,61982,61983,61984,61989,62057,62059,62060,62064,62065,62071,62091,6209…	ACADM,ACBD3,ACER3,ACKR6,ACVR1C,ADD3,ADRB1,AGTR1,AHR,AK3,AKAP12,ALAS1,AMPD3,ARFGAP3,ARFGEF2,ARHGAP26,ARHGAP44,ATG16L1,B3GNT3,BAALC,BCAT1,BDH1,BTG1,C1GALT1,C1QTNF3,C4BPA,CALML4,CASP7,CD55,CDC42EP3,CDS1,CEACAM1,CEBPB,CENPV,CITED2,CLIC5,CLINT1,CNOT11,COG6,CORO2A,CP,CPD,CTGF,CXCL17,CYB5A,DAP,DESI2,DRAM1,DUSP4,DUSP6,EEPD1,EFNA5,EIF2AK3,EIF4EBP2,ENTPD3,ENTPD4,EPAS1,ETFDH,EYA2,FAM171A1,FDFT1,FRY,FUCA1,GA…	ABCC3,ABHD17C,ACAA1,ACACA,ACAD8,ACADM,ACBD3,ACER3,ACKR6,ACOX1,ACSL3,ACVR1C,ACVR2A,ADAP1,ADD3,ADRB1,AGAP1,AGFG2,AGPAT9,AGTR1,AHR,AIFM2,AK1,AK3,AKAP12,ALAS1,ALDH1A3,ALG1,AMIGO1,AMPD3,ANKMY2,ANKS6,AOC1,APOL6,APOO,APPL2,ARFGAP3,ARFGEF2,ARHGAP26,ARHGAP27,ARHGAP44,ARHGAP5,ARHGEF28,ARNTL2,ARPC5L,ASAH1,ASIC1,ASPH,ATG16L1,ATG4A,ATP10B,ATP1B1,ATP2C2,ATP6V0B,ATP7B,ATP8B1,ATP8B4,ATPAF1,AUTS2,B3GNT3,B3GNT7,B4…
MSigDB Perturbation	VANTVEER_BREAST_CANCER_ESR1_DN	Down-regulated genes from the optimal set of 550 markers discriminating breast cancer samples by ESR1 [GeneID=2099] expression: ER(+) vs ER(-) tumors.	185	0.000897192	1	0.0163143	1.39668	66.5867	93	2032	0.0406468	0.0457677	61	232	236	33,49,67,70,79,96,99,112,121,158,181,204,274,294,351,383,410,425,429,432,441,533,619,651,662,716,735,739,780,800,832,838,930,937,956,1035,1040,1070,1079,1100,1111,1167,1198,1324,1334,1338,1370,1371,1407,1478,1493,1512,1520,1530,1570,1596,1611,1687,1690,1717,1761,1779,1847,1853,1867,1913,1916,1920,2081,2126,2165,2218,2258,2259,2278,2288,2307,2320,2322,2323,2343,2356,2370,2401,2446,2486,2501,2539,2…	33,49,67,70,79,96,99,112,121,158,181,204,274,294,351,383,410,425,429,432,441,533,619,651,662,706,716,724,735,739,780,800,830,832,838,930,937,956,1035,1040,1070,1079,1087,1100,1111,1167,1198,1199,1222,1313,1324,1334,1338,1370,1371,1402,1407,1437,1478,1493,1512,1520,1530,1543,1570,1586,1596,1611,1678,1687,1690,1712,1717,1718,1761,1779,1847,1849,1853,1867,1913,1916,1920,2051,2081,2126,2140,2165,2218…	ADM,ATP1B3,BIRC2,CCL5,CD180,CEBPG,CTSC,DEFB1,DESI2,DSC2,DYSF,ENO1,FAM171A1,FOXC1,GABRP,HEBP2,HIF1A,IFNAR2,IMPA2,KIF1B,LILRB3,LMO4,LYN,MAPRE2,MCM5,MELK,MMP7,MPZL1,MSN,MYO10,NCOA7,ODC1,PDCD5,PIM1,PSAT1,RARRES1,RBMS1,RCAN1,SERBP1,SHFM1,SLC2A5,SLC2A6,SMCO4,SNN,SRGN,SRSF7,ST14,ST8SIA1,SYNCRIP,TBC1D1,TBPL1,TLDC1,TMCC2,TMEM123,TMSB10,TNFAIP3,TNFRSF21,TTK,UBE2E3,UBE2J1,UCK2	ADAMTS7,ADM,AGFG1,AMD1,ANLN,APOBEC3B,ASNS,ASS1,ATAD3A,ATL3,ATP1B3,BCL11A,BCL2A1,BIN1,BIRC2,BLM,BTG3,BUB1,CA9,CCL18,CCL5,CCNB2,CCNC,CD180,CDC20,CDCA8,CDH3,CDK2AP1,CEBPG,CENPA,CENPW,CEP55,CHI3L1,CHIC2,CHST2,CLCN4,CORO1C,CREB3L2,CSRP2,CSTB,CTPS1,CTSC,CTSV,CX3CL1,CXorf61,CYB5R2,CYBA,CYBB,DAPK1,DEF8,DEFB1,DESI2,DSC2,DUSP2,DUSP9,DYSF,EGFL6,EML4,ENO1,EPHA2,FABP7,FAM171A1,FAM20A,FAM64A,FANCA,FDX1,FNDC3B,…
MSigDB Perturbation	KRISHNAN_FURIN_TARGETS_UP	Genes up-regulated in naive T lymphocytes lacking FURIN [GeneID=5045]: Cre-Lox knockout of FURIN in CD4+ [GeneID=920] cells.	186	0.000926721	1	0.0167607	3.07966	3.57183	11	109	0.00480769	0.100917	2	11	13	2.12553e+36	21,255,307,473,650,778,1106,1221,2270,2458,2467,2911,3129,3481,3539,3726,4472,5042,5283,5605,6591,7639,8876,9019,9289,9484,9548,9606,10097,10859,10866,12222,12416,13267,13955,15157,15199,15230,16210,16732,16771,17141,17907,19175,20242,20295,21289,22347,22901,23982,23988,24745,24892,25615,25943,26016,26086,26189,26375,26533,26598,27913,28513,28548,28887,29838,31238,32229,35445,36146,36536,36602,37…	H3F3A,TGM2	DTL,FOS,H3F3A,H3F3B,HSPA1B,HSPA8,JUN,LAPTM5,MGARP,TGM2,TP53INP2
MSigDB Perturbation	DUNNE_TARGETS_OF_AML1_MTG8_FUSION_DN	Genes down-regulated in Kasumi-1 cells (acute myeloid leukaemia (AML) with the t(8;21) translocation) after knockdown of the AML1 MTG8 fusion [GeneID=861;862] by RNAi.	187	0.000940408	1	0.0169173	2.1505	9.76517	21	298	0.00917832	0.0704698	8	19	19	8,18,39,253,328,498,701,965,1136,1325,1423,1553,1592,1676,1819,1904,2098,2281,2392,2601,2684	8,18,39,253,328,498,701,965,1136,1325,1423,1553,1592,1676,1819,1882,1904,2098,2281,2392,2601,2684,2713,3038,3083,3221,3322,3422,3574,3658,3715,3856,3924,4077,4905,5232,6263,6944,7239,7313,7414,7622,7917,8196,8883,8903,9020,9345,9413,9849,10344,11006,11199,11577,11633,11775,11864,12138,12174,12208,12607,13199,13331,13599,13717,13719,13746,14212,14343,14576,14615,14657,15108,15156,15536,15671,15988…	BAALC,CD34,DUSP6,EDIL3,ELK3,MTSS1,SAMSN1,SLC2A3	ADAM12,BAALC,CD34,CKB,DEPTOR,DUSP6,ECM1,EDIL3,ELK3,FOSL2,ID1,IFI16,MEF2C,MTSS1,RANBP2,RUNX1T1,SAMSN1,SLC2A3,TSPAN7
MSigDB Perturbation	HARRIS_BRAIN_CANCER_PROGENITORS	Genes from the brain cancer stem (cancer stem cell, CSC) signature.	188	0.0009609	1	0.017194	2.02881	11.8296	24	361	0.0104895	0.066482	9	42	43	1.51131e+84	15,113,128,145,174,210,219,332,419,781,1008,1363,1547,1576,1600,1648,1723,1728,1764,1942,2119,2214,2405,2440,2485,2675,2734,2852,2937,3076,3334,3897,4078,4132,4291,4324,4535,4636,4722,4802,4933,4943,5365,5587,6167,6307,6519,6599,7244,7496,7602,7739,7801,7992,8417,8896,9232,9942,10272,10410,10419,10498,11202,11388,12315,12372,12663,12738,13024,13343,13610,13814,13978,14005,14331,14712,15411,15485,…	CAV1,DHRS3,ENPP6,ERVFRD-1,GJA1,NINJ2,PAPSS2,TEAD1,WNT5A	AOX1,ARHGAP29,ARHGAP6,BFSP2,BGN,CAPG,CASP4,CAV1,COL6A1,COL6A2,CREBRF,CYTL1,DDC,DHRS3,ENPP6,ENSG00000117600,ERVFRD-1,FAM19A2,FOXA3,FOXC2,GJA1,GPR17,KAZALD1,KCNA4,LARP6,LGALS2,MGP,MIA,MLIP,NINJ2,OPCML,PAPSS2,PID1,S100A6,SCG3,SCG5,SHISA2,SRPX2,TEAD1,TMEM212,VWC2,WNT5A
MSigDB Perturbation	VISALA_RESPONSE_TO_HEAT_SHOCK_AND_AGING_UP	Genes up-regulated after heat shock in peripheral lympocytes from old donors, compared to those from the young ones.	189	0.00102321	1	0.0182121	3.52115	2.55599	9	78	0.00393357	0.115385	6	14	14	4.76559e+30	476,558,560,709,749,1254,1420,2492,2504,2905,3482,3823,3862,4088,5138,5670,6514,6698,10015,10215,10259,11197,11198,11999,12549,12557,13193,18133,19986,20050,20191,20853,21662,22104,22250,23790,25459,25627,27611,28328,30899,31524,31771,32704,32939,36912,38522,38654,39041,40035,40102,40212,41047,42354,43187,43790,44468,46987,47737,48425,49108,49563,51723,53904,55981,56604,57133,60423,61891,62544,62…	ADAR,FDFT1,GRSF1,NDUFS4,PRKAR1A,SLC12A4	ADAR,CDK18,CLEC2B,DHPS,FDFT1,GRSF1,NDUFS4,P4HA1,PITX2,PRKAR1A,SLC12A4,ST13,TRPC1,TUBA1A
MSigDB Perturbation	HASLINGER_B_CLL_WITH_MUTATED_VH_GENES	Genes changed in the B cell chronic lymphocytic leukemia (B-CLL) with mutations in the variable immunoglobulin veriable heavy chain (VH) genes.	190	0.0010282	1	0.0182045	2.3581	7.20919	17	220	0.00743007	0.0772727	3	18	18	18,63,142,236,253,302,598,1136,1164,1259,1546,1592,1671,1927,2325,2429,2735	18,63,142,236,253,302,598,1136,1164,1259,1546,1592,1671,1927,2325,2429,2735,3222,3598,4067,4124,4667,4747,5331,5589,6095,6432,7305,7465,7904,8457,8458,8661,9153,9248,10030,10064,10206,10499,10691,12105,13167,14360,14527,14555,14556,15141,15586,15798,15849,16443,16444,16445,16446,17296,17475,17693,17932,18004,18143,18295,18403,18670,18671,18872,19216,19273,19869,19940,20468,20547,20666,20698,21513…	LPCAT1,NRIP1,SEPT10	COBLL1,DMD,IL10RA,KLK2,LDOC1,LPCAT1,LPL,MAL,NRIP1,P2RX1,PCDH9,PCSK7,SEPT10,SORL1,TCF7,TLE1,WSB2,ZBTB20
MSigDB Perturbation	AMUNDSON_DNA_DAMAGE_RESPONSE_TP53	Genes discriminating TP53 [GeneID=7157] status across various genotoxic stress agents.	191	0.00104058	1	0.0183273	2.51511	5.96397	15	182	0.00655594	0.0824176	8	16	16	6.71234e+53	67,123,404,434,510,1132,1382,1767,1820,1831,1846,2032,2125,2323,2426,3024,3168,3797,3875,4249,4434,4601,4607,4804,5311,5327,5352,5539,5980,6042,6128,6179,6525,6570,6752,6807,7027,7031,7499,7740,8377,8724,8744,8872,8881,9456,9500,9541,9829,9930,9997,10010,11793,11843,12263,12424,12453,12574,12575,13355,13400,14072,14118,14687,14912,15314,16293,17467,18248,18997,19203,19492,19831,20573,22407,22526,…	BAI3,BTG1,CCNG1,CDKN1A,CTSD,DDB2,MDM2,ST14	BAI3,BTG1,BTG2,CCNG1,CDKN1A,CTSD,DDB2,LIF,MDM2,PHLDA3,PLXNB2,PPM1D,ST14,TNFSF9,TRIM22,XPC
MSigDB Perturbation	BRACHAT_RESPONSE_TO_CISPLATIN	Genes up-regulated in FL5.12 cells (pro-B lymphocyte) in response to cisplatin [PubChem=2767].	192	0.00104364	1	0.0182855	2.42918	6.58658	16	201	0.00699301	0.079602	7	21	22	1.51131e+54	15,113,128,145,174,210,332,419,1288,1576,1820,1846,2032,2186,2426,2643,3180,3510,3630,3819,3875,3880,4490,5211,5311,5365,5752,5841,5853,6525,6570,6752,7142,7267,7740,7992,8096,8251,8404,8439,8524,8629,8724,9087,9437,9852,9886,10040,10369,11375,11793,11843,12081,12123,12638,12880,13420,14736,14912,15881,16074,16097,16541,17133,17480,18134,18335,18554,18646,19203,19658,20681,21028,21050,21058,21313…	CCNG1,CD53,CDKN1A,DHRS3,EMR1,MDM2,TOB1	ABLIM1,ASNSD1,BTG2,CCNG1,CD53,CDKN1A,DHRS3,EI24,EMR1,HBA1,HBA2,ISOC1,LPIN1,MDM2,NABP1,PMM1,TMEM185A,TOB1,TP53INP1,TXNIP,VMP1
MSigDB Perturbation	HIRSCH_CELLULAR_TRANSFORMATION_SIGNATURE_UP	Up-regulated genes in the cancer gene signature, representing a gene signature of cellular transformation.	193	0.00105673	1	0.0184189	1.38645	67.7991	94	2069	0.0410839	0.0454326	51	237	240	14,44,65,72,94,104,105,148,191,205,208,225,228,240,278,320,321,328,350,351,403,449,493,516,538,544,551,560,572,628,673,695,703,709,712,718,720,749,780,1012,1070,1103,1118,1135,1207,1213,1219,1227,1350,1354,1389,1442,1500,1507,1520,1529,1561,1575,1606,1610,1616,1638,1680,1723,1775,1802,1935,1961,2000,2030,2033,2047,2091,2098,2146,2151,2179,2181,2259,2278,2283,2285,2337,2411,2475,2481,2485,2555,257…	14,44,65,72,94,104,105,148,191,205,208,225,228,240,278,320,321,328,350,351,403,449,493,516,519,538,544,551,560,572,628,673,695,703,709,712,718,720,740,749,780,932,1012,1054,1070,1087,1103,1118,1135,1207,1213,1219,1227,1350,1354,1389,1396,1434,1442,1500,1507,1520,1529,1561,1575,1585,1606,1610,1616,1632,1638,1680,1723,1771,1775,1802,1935,1961,2000,2013,2022,2030,2033,2047,2059,2091,2098,2140,2146,2…	ALAS1,ANKRD46,ARHGEF18,ARHGEF2,CAAP1,CD55,CD97,CTSB,CYTH1,EIF1,EIF1B,EPAS1,EVI2A,EVI2B,FST,FUT8,GCH1,GPR126,HIF1A,IER2,IFI35,IL1A,IL1B,IRF2,LHFPL2,MAK16,MAP3K5,MID1IP1,MRPS18A,NPC1,PAPPA,PDE4B,PGS1,PHLDA1,RIPK2,RND3,S1PR1,SERPINE2,SIGIRR,SLC2A3,SNAP23,SNAPC1,STON1-GTF2A1L,TAB2,TGIF1,TNFRSF21,UGCG,UPP1,VEGFA,VRK2,WIPI1	ABCA1,ACSL3,AGFG1,ALAS1,ALDOC,ANKRD28,ANKRD46,ANXA3,ANXA7,APPL2,ARHGEF18,ARHGEF2,ARNTL2,ARPC5L,BCL2A1,BCL2L1,BCL3,BNIP3,C17orf62,C1R,C1S,CA9,CAAP1,CANT1,CARHSP1,CASP4,CD55,CD68,CD97,CDCP1,CFH,CFHR3,CLEC2B,CPSF3L,CREM,CSF3,CSNK2B,CTBS,CTSB,CTSL,CXCL3,CYB5R2,CYTH1,DCTN6,DENND1A,DFNA5,DGUOK,DHRS7,DOCK4,DUSP1,EEF1A2,EGLN1,EHD4,EIF1,EIF1B,ENSG00000259529,EPAS1,EPHA2,EPN2,EREG,ETHE1,ETS2,EVI2A,EVI2B,EV…
MSigDB Perturbation	MULLIGHAN_MLL_SIGNATURE_2_UP	The 'MLL signature 2': genes up-regulated in pediatric AML (acute myeloid leukemia) with rearranged MLL [GeneID=4297] compared to the AML cases with intact MLL and NPM1 [GeneID=4869].	194	0.00107092	1	0.0185699	1.33524	87.6244	117	2674	0.0511364	0.0437547	87	393	406	24,34,43,76,89,109,116,181,196,212,248,267,282,300,306,310,354,369,397,408,410,470,472,483,527,567,590,616,643,659,666,734,752,800,817,829,847,867,910,922,943,968,988,1013,1030,1092,1124,1159,1177,1186,1201,1211,1230,1242,1269,1291,1300,1342,1357,1366,1367,1436,1452,1465,1467,1471,1486,1501,1544,1547,1550,1552,1558,1570,1572,1582,1598,1637,1700,1737,1764,1777,1779,1877,1919,1964,2015,2040,2081,21…	24,34,43,76,89,109,116,181,196,212,248,267,282,300,306,310,354,369,397,408,410,470,472,483,527,567,590,616,643,659,666,734,752,800,817,829,847,852,867,898,910,922,943,968,988,1013,1030,1092,1124,1159,1177,1186,1201,1209,1211,1230,1235,1242,1249,1269,1291,1300,1342,1345,1357,1366,1367,1428,1436,1452,1465,1467,1471,1486,1501,1544,1547,1550,1552,1558,1570,1572,1578,1582,1598,1637,1700,1737,1764,1777…	ABHD2,ABR,ACTR2,ADARB1,ADCY9,APBB1IP,ARHGEF3,ARNTL,ARPC2,ATP5SL,ATP6V0C,BCAP29,BEGAIN,CCR1,CDC42EP3,CEBPG,CIAO1,CLTCL1,CNPY3,DACH1,DHRS7B,DPEP2,DUSP7,EHBP1L1,EIF4EBP2,ELF4,ENO1,EVI2B,FAM53B,FBP1,FCGR1B,FZD2,GNA14,GNS,HIC2,HIP1,HOXA4,HOXA5,IQCE,ITGAX,ITGB7,KPNA1,LAMP2,LILRB2,LNPEP,LTB4R,MFSD1,MGST2,MR1,MYO1F,NINJ2,NIPBL,NLRP3,NUP210,NUP50,PLA2G4A,PPIF,PPT1,PSEN1,RASSF2,RBM47,RECK,RER1,RIMS1,RNPEPL…	ABCA7,ABCA8,ABHD17A,ABHD2,ABR,ACTR2,ADARB1,ADCY7,ADCY9,ADRB2,AK2,AKAP9,AKR7A3,AKT2,ALAD,ALDH3A2,ALDH3B1,AP1S2,APBB1IP,APOBR,APOC2,ARHGAP1,ARHGAP11A,ARHGEF3,ARHGEF40,ARL6IP5,ARNTL,ARPC2,ARPC4,ASPSCR1,ATG3,ATP5SL,ATP6V0C,ATP6V0E1,ATP6V1D,ATP8B4,ATXN1,BATF,BCAP29,BEGAIN,BEST1,BID,BLOC1S1,BMI1,C11orf21,C12orf5,C1RL,CAMKK2,CAND2,CAPG,CASP1,CAT,CBFB,CCL23,CCND3,CCR1,CD2BP2,CD300C,CD302,CDC42EP3,CEBPA,C…
MSigDB Perturbation	DELPUECH_FOXO3_TARGETS_DN	Genes down-regulated in DL23 cells (colon cancer) upon expression of an activated form of FOXO3 [GeneID=2309].	195	0.00107878	1	0.0186103	2.08499	10.5516	22	322	0.00961539	0.068323	8	38	39	75,76,94,181,239,241,337,440,508,564,622,662,1242,1350,1530,1555,1593,1637,1729,1845,2382,2455	75,76,94,181,239,241,337,440,508,564,622,662,1242,1350,1530,1555,1593,1637,1729,1845,2382,2455,2993,3238,3482,3512,3629,3975,3983,4376,4516,4725,4752,5159,5192,5203,5215,5269,5298,5347,5405,5691,5724,5798,5985,6024,6379,6480,6628,6698,6721,6868,7017,8043,8823,8868,9098,9285,9701,10334,10549,10612,10650,10927,11430,11706,11796,11807,11869,12381,12609,12867,13525,14016,14224,14795,15149,15365,15461…	CDC42EP3,CEBPG,EFNB2,GADD45A,H1F0,SLC7A1,SMC4,VEGFA	AARS,APEX1,AREG,AREGB,AURKA,CDC42EP3,CEBPG,CENPF,DTYMK,EFNB2,EXOSC8,FOXM1,GADD45A,H1F0,HAX1,IARS,KIF22,LARS,MB,MKI67,MTHFD2,NEK2,NUPR1,NUSAP1,PCK2,PFN2,PITX2,PRC1,PYCR1,SHMT2,SLC1A4,SLC7A1,SMC4,TIAL1,UBE2C,VEGFA,XPOT,ZWINT
MSigDB Perturbation	SAKAI_TUMOR_INFILTRATING_MONOCYTES_UP	Selected genes up-regulated in inflammatory monocytes infiltrating hepatocellular carcinoma (HCC).	196	0.00108802	1	0.018674	2.172	9.2081	20	281	0.00874126	0.0711744	8	25	26	2.11322e+67	21,132,151,289,307,473,525,649,650,778,921,1106,1221,1547,1699,1969,2009,2194,2414,2467,2834,2954,3334,3455,4310,4345,4370,4472,4524,4753,4866,4977,5436,5461,5470,6161,6488,6882,7312,7421,7848,8293,8352,8529,8660,9064,9606,10821,10918,11155,11167,11298,11657,11790,12038,12051,12379,12603,12735,12801,12810,13110,13309,13514,13695,13989,14139,14418,14481,14644,14931,15151,15548,16361,16891,17127,17…	CDC42BPA,FLNB,HDAC7,ITGA9,LIMS1,NEBL,TEAD1,TGM2	ATN1,BTRC,CA9,CACNB4,CDC42BPA,FLNB,HDAC5,HDAC7,ITGA9,ITGB3,KIF17,LIMS1,MAML1,MAPK8,NEBL,NPHP4,NRG1,NSF,PIP5K1C,SEMA4C,SH3GL2,SPEN,TEAD1,TGM2,WASF3
MSigDB Perturbation	NUYTTEN_EZH2_TARGETS_UP	Genes up-regulated in PC3 cells (prostate cancer) after knockdown of EZH2 [GeneID=2146] by RNAi.	197	0.00112391	1	0.019192	1.16523	303.802	354	9271	0.15472	0.0381836	222	985	1001	2,11,21,31,32,33,37,45,54,55,60,67,72,76,81,94,96,104,105,110,111,115,162,165,172,188,190,192,194,205,208,212,214,218,222,223,226,238,246,252,262,263,275,277,278,279,283,290,307,308,313,321,329,341,347,367,383,395,402,410,417,423,444,453,454,457,464,469,472,473,483,484,487,488,499,504,509,532,537,544,555,557,560,565,572,584,585,586,592,597,602,607,615,619,625,630,643,650,658,662,672,674,676,677,6…	2,11,21,31,32,33,37,45,54,55,60,67,72,76,81,94,96,104,105,110,111,115,162,165,172,188,190,192,194,205,208,212,214,218,222,223,226,238,246,252,262,263,275,277,278,279,283,290,307,308,313,321,329,341,347,367,383,395,402,410,417,423,444,453,454,457,464,469,472,473,483,484,487,488,499,504,509,519,532,537,544,555,557,560,565,572,584,585,586,592,597,602,607,615,619,625,630,643,650,658,662,665,672,674,6…
2085,42115,42117,42118,42131,42139,42143,42158,42172,42177,42189,42194,42198,42223,42234,42238,42241,42259,42261,42266,42272,42273,42289,42312,42321,42322,42329,42331,42334,42335,42336,42345,42357,42363,42374,42398,42427,42430,42436,42439,42440,42467,42476,42481,42493,42499,42505,42535,42542,42543,42553,42564,42583,42585,42588,42593,42596,42621,42625,42626,42628,42629,42630,42636,42641,42644,4264…	ABCA13,ACTR3,ADAR,ADIPOR2,ADM,ADSS,ANGPTL4,ANK1,ANKRD46,ANPEP,APLP2,ARHGAP17,ARHGAP21,ARRDC3,ARRDC4,ASB2,ATF3,ATG12,B4GALT5,BACH1,BAIAP2,BANK1,BATF2,BEAN1,BHLHE40,BIRC2,C1GALT1C1,CA13,CASP7,CCL20,CCL26,CCR1,CD44,CD83,CDC42EP3,CDC42SE2,CDKN1A,CEACAM1,CEBPB,CMC1,COL5A1,COMMD10,CSF1,CTGF,CTSB,CTSC,CYB561,CYB5A,CYTH1,DCBLD2,DDIT4,DENND5A,DLX2,DNAJA1,DNAJB6,DNMT3A,DRAM1,DSE,EDN1,EFNA5,EIF4EBP2,ENDOD1,…	ABCA13,ABCA5,ABHD13,ABL2,ABTB2,ACBD5,ACE2,ACOT2,ACTR3,ACYP2,ADAM17,ADAM8,ADAMTS14,ADAMTS6,ADAR,ADIPOR2,ADM,ADRB2,ADSS,AGPAT3,AGRN,AGT,AHNAK2,AHRR,AIM2,AKIRIN2,ANGPTL4,ANK1,ANKFY1,ANKRD30B,ANKRD37,ANKRD46,ANPEP,ANXA1,ANXA2,ANXA4,ANXA5,AP1AR,AP1S2,AP3M1,APBB2,APC2,APLN,APLP2,APOL2,APOL3,APOL6,APP,AQP11,AQP3,ARF3,ARFGEF1,ARHGAP17,ARHGAP21,ARHGAP39,ARID5B,ARL2BP,ARL4C,ARL5B,ARL6IP1,ARMCX3,ARRDC3,ARRD…
MSigDB Perturbation	WANG_METHYLATED_IN_BREAST_CANCER	Genes up-regulated in MDA468 cells (breast cancer) vs DU99 cells (normal breast) after treatment with azacytidine [PubChem=9444].	198	0.00115848	1	0.0196825	1.93993	13.4025	26	409	0.0113636	0.0635697	15	34	35	1.11102e+88	11,110,171,219,480,485,499,504,599,615,662,664,677,912,1180,1190,1215,1272,1530,1683,1910,2017,2181,2197,2266,2332,2452,2527,2570,2869,2870,3286,3326,3450,3493,3510,3608,3712,3771,3798,4082,4087,4465,4571,4638,4835,4875,5172,5462,5559,5634,5677,5724,5742,5816,5889,5913,5985,6115,6168,6288,6322,6410,6602,6604,6649,6652,6679,6881,7142,7213,7224,7611,7801,8435,8548,8726,8814,9110,9131,9171,9435,9584…	CAV1,DKK1,ETV5,GADD45A,GDF15,HBEGF,KLF6,KRT17,MAFF,PTPRG,SMURF2,SPHK1,STK17A,THBS1,UPP1	CAV1,CDC25A,CLC,CTNNA1,DKK1,DUSP1,EPHA2,ETV5,F3,FOSL1,FYN,GADD45A,GDF15,HBEGF,INHBA,IRS2,KLF6,KRT17,MAFF,MYO1B,PTPRG,PTRF,SERPINB8,SLC3A2,SLC7A5,SLC9A1,SMURF2,SPHK1,STK17A,THBS1,TNFRSF10B,TUBB,UPP1,ZYX
MSigDB Perturbation	KATSANOU_ELAVL1_TARGETS_UP	Genes up-regulated in MEF cells (embryonic fibroblast) with ELAVL1 [GeneID=1994] knocked out.	199	0.00118103	1	0.0199647	1.48095	44.5659	66	1360	0.0288462	0.0485294	37	159	164	15,21,49,113,127,128,145,174,210,248,263,292,307,332,335,419,473,474,543,615,644,650,662,673,701,713,778,791,823,912,990,1002,1106,1148,1221,1243,1299,1309,1323,1435,1464,1530,1576,1620,1635,1640,1679,1706,1758,1772,1814,1907,1935,1971,2020,2072,2092,2130,2307,2343,2448,2467,2518,2665,2678,2684	15,21,49,113,127,128,145,174,210,248,263,292,307,332,335,419,473,474,543,615,644,650,662,673,701,713,778,791,823,912,929,949,990,1002,1080,1106,1148,1189,1221,1243,1299,1309,1323,1435,1464,1530,1576,1591,1620,1635,1640,1679,1706,1758,1769,1772,1814,1872,1905,1906,1907,1935,1971,2020,2072,2092,2130,2307,2343,2448,2450,2467,2518,2665,2678,2684,2713,2777,2874,2877,2922,2966,2983,3054,3083,3104,3110,…	ALX1,ANKRD1,ANKRD44,CTSC,CXCL12,DHRS3,DUSP6,EMCN,EPHA4,FAM101B,FAM150A,FOXC1,FOXF1,GADD45A,GALNT11,GDF15,HIPK2,HOXA5,IGF1,ITPRIPL2,KIF21B,MAP3K7CL,MPEG1,MYL12B,NTN4,PAPPA2,PCGF5,PGPEP1,PTP4A3,RARB,SERPING1,SFN,SLC7A7,SSBP2,SUSD2,TGM2,ZNF736	ABHD1,ABLIM1,ADAMTS10,ADAMTS5,AGA,AIF1L,ALDH1A1,ALDH1A3,ALX1,ANKRD1,ANKRD44,APOE,ATP10D,BLOC1S3,BMP4,C19orf33,C1QA,C1QB,C21orf62,C3AR1,C4orf3,CCL17,CCL25,CCNG2,CD200,CD52,CDH10,CDKL3,CERS4,CMBL,COL11A1,CTSC,CTSH,CTSS,CXCL12,CYBB,DAPK1,DCAF12L1,DDAH2,DHRS3,DMPK,DNER,DSP,DUSP27,DUSP6,EBPL,EMCN,ENG,EPHA4,EPHA7,ESD,FAM101B,FAM132A,FAM150A,FAM210B,FAS,FBXL7,FIBIN,FJX1,FOXC1,FOXD1,FOXF1,FXYD6,FZD6,GADD…
MSigDB Perturbation	MEDINA_SMARCA4_TARGETS	Genes up-regulated in H1299 cells (lung cancer) by expression of SMARCA4 [GeneID=6597] off a plasmid vector.	200	0.00118294	1	0.0198971	1.96628	12.7144	25	388	0.0109266	0.064433	10	42	42	4,38,114,122,139,290,347,412,509,518,625,698,734,842,1326,1570,1779,1886,1915,2073,2350,2418,2427,2479,2562	4,38,114,122,139,290,347,412,509,518,625,698,734,842,862,1326,1570,1779,1886,1915,2073,2329,2350,2418,2427,2479,2507,2562,2666,3114,3265,3292,3434,3866,3904,3981,4248,4334,4498,4543,4604,4862,4968,5056,5205,5532,5628,5676,5747,5792,5935,5947,6004,6078,6213,6389,6417,6421,6425,6457,6581,6651,6906,6959,7138,7320,7474,7700,7868,7903,7955,8089,8180,8330,8508,8752,9170,9352,9489,9713,9794,9864,9873,99…	ASCC1,C19orf12,CEBPB,DYNC1H1,KANSL1,KIAA1279,RAF1,SKAP2,SMARCA2,TBX2	ASCC1,ATP6V1B1,C19orf12,CCDC85B,CDH11,CDH16,CDKN2D,CEBPB,CLPX,CSNK1G2,CTSS,CYP3A4,DYNC1H1,ECM2,GPC6,HDAC4,KANSL1,KIAA1279,LDB1,MXD4,NADSYN1,NFKB2,NT5C3A,PCDH1,PGM2L1,PPCS,RAF1,RALBP1,RASSF1,RBM4B,SKAP2,SLC2A4,SMAD6,SMARCA2,SMARCA4,SNAPC2,ST6GALNAC4,STARD10,TBX2,TNFSF10,TNFSF13,ZNF185
MSigDB Perturbation	ONDER_CDH1_TARGETS_2_DN	Genes down-regulated in HMLE cells (immortalized nontransformed mammary epithelium) after E-cadhedrin (CDH1) [GeneID=999] knockdown by RNAi.	201	0.00121354	1	0.0203102	1.26188	133.927	169	4087	0.0738636	0.0413506	111	439	458	4,7,8,12,29,45,66,67,80,89,115,160,171,188,194,208,215,228,235,244,250,267,275,277,289,308,320,328,348,351,362,364,369,396,399,408,446,457,470,498,503,525,555,563,566,572,575,591,594,597,599,628,659,666,689,701,705,707,734,774,780,805,807,808,817,836,897,915,921,965,982,990,991,1003,1040,1056,1070,1086,1118,1153,1154,1155,1157,1172,1206,1207,1217,1230,1232,1238,1270,1300,1303,1320,1326,1339,1392,…	4,7,8,12,29,45,66,67,80,89,115,160,171,188,194,208,215,228,235,244,250,267,275,277,289,308,320,328,348,351,362,364,369,396,399,408,446,457,470,498,503,525,555,563,566,572,575,591,594,597,599,606,628,637,659,666,689,701,705,707,734,771,774,780,805,807,808,817,830,836,897,898,915,921,932,949,964,965,982,990,991,1003,1040,1056,1070,1086,1087,1118,1153,1154,1155,1157,1172,1206,1207,1217,1230,1232,123…	ADTRP,AJAP1,ALS2CL,AMPD3,ANK3,ANO1,ARAP2,ARHGEF3,ATP12A,ATP2B4,B3GNT3,BMP2,CADM1,CCL20,CCND2,CD1D,CD44,CD55,CD83,CDS1,CEACAM1,CNTN1,CORO2A,CTSC,CYB561,DDR1,DSC2,DSC3,DUSP10,DUSP6,EDN1,EPAS1,EXPH5,FAM69A,FERMT1,FGFBP1,FGFR2,FLNB,FLRT3,FST,GALNT3,GCH1,GCLC,GM2A,GRHL2,HBEGF,HDAC9,HOXA1,HPSE,IER3,IL18,IL1A,IL1B,INPP4B,ITGA6,KCNK1,KIAA0247,KLF5,KRT17,LAMA3,LGR4,LIMK2,LPHN2,LYN,LYPD3,MAOA,MAP3K9,MAP7,M…	ABCA12,ABCG2,ABLIM1,ADAM8,ADIRF,ADRB2,ADTRP,AGRN,AIM1,AJAP1,AKAP1,AKR1C1,AKR1C2,ALDH1A3,ALOX15B,ALS2CL,AMPD3,ANK3,ANO1,ANXA3,AP1M2,APOC1,AQP3,ARAP2,AREG,AREGB,ARG2,ARHGAP25,ARHGDIB,ARHGEF3,ARHGEF4,ARHGEF5,ARL4C,ARTN,ATP12A,ATP2B4,B3GNT3,B4GALT4,BACE2,BDKRB2,BHLHE41,BIK,BIRC3,BMP2,C10orf10,C1orf116,C3,CA12,CA2,CA9,CADM1,CAMK2B,CAMK2N1,CASP1,CBLC,CCL20,CCNA1,CCND2,CCNG2,CD1D,CD44,CD55,CD82,CD83,CD9…
MSigDB Perturbation	BOYLAN_MULTIPLE_MYELOMA_C_CLUSTER_DN	Genes from cluster 2: down-regulated in group C of tumors arising from overexpression of BCL2L1 and MYC [GeneID=598;4609] in plasma cells.	202	0.00124392	1	0.0207155	1.85531	15.6308	29	477	0.0126748	0.0607967	10	38	44	3,18,84,253,596,660,910,951,952,961,987,1136,1164,1170,1172,1177,1180,1592,1797,1869,1927,2065,2266,2325,2359,2429,2476,2681,2735	3,18,84,253,596,660,910,951,952,961,987,1094,1136,1164,1170,1172,1177,1180,1592,1797,1869,1927,2065,2106,2266,2325,2332,2359,2429,2476,2681,2735,2888,3015,3230,3362,3450,3608,3659,3667,3712,3771,3906,3979,4120,4274,4357,4441,4492,4744,4835,4875,4946,5026,5153,5331,5509,5589,5598,5623,5816,5953,5993,5999,6059,6195,6271,6359,6419,6640,6679,6726,7139,7224,7438,7611,7721,7732,7840,7904,8233,8254,8456…	AIG1,CCND2,KLF6,NRIP1,RAB20,RECK,RRAS2,SOAT1,TMEM66,ZBTB10	AIG1,AK7,B4GALT6,CCND2,CD69,CTSL,EGLN3,EID2,HIST1H4A,HIST1H4C,HIST1H4E,HIST1H4H,HIST1H4I,HIST1H4J,HIST1H4L,HIST4H4,HS1BP3,IRS2,KLF6,KLF7,MS4A1,NRIP1,PTPN22,RAB20,RECK,RGS1,RNF125,RRAS2,SAT1,SERPINB1,SLC7A11,SOAT1,SPP1,TMEM66,TRIM34,TRIM6-TRIM34,ZBTB10,ZBTB20
MSigDB Perturbation	BENPORATH_NOS_TARGETS	Set 'NOS targets': genes upregulated and identified by ChIP on chip as targets of the transcription factors NANOG , OCT4, and Sox2 [GeneID=79923;5460;6657] (NOS) in human embryonic stem cells.	203	0.00125477	1	0.0207934	1.39505	63.0804	88	1925	0.0384615	0.0457143	47	176	176	15,24,113,128,145,156,164,169,174,210,332,338,348,367,399,417,419,444,464,468,545,552,590,630,633,649,701,750,751,769,781,793,813,902,933,951,1003,1025,1084,1092,1108,1182,1190,1194,1232,1272,1316,1324,1390,1476,1576,1648,1668,1699,1706,1728,1733,1773,1788,1790,1821,1839,1880,1930,1968,2003,2010,2038,2079,2109,2163,2187,2257,2267,2270,2320,2356,2396,2458,2527,2643,2644,2670,2675,2684,2704,2726,27…	15,24,113,128,145,156,164,169,174,210,332,338,348,367,399,417,419,444,464,468,545,552,590,630,633,649,701,750,751,769,781,793,813,902,933,951,964,1003,1025,1084,1092,1108,1182,1190,1194,1204,1232,1272,1316,1324,1390,1416,1476,1487,1576,1580,1648,1668,1699,1706,1728,1733,1773,1788,1790,1821,1839,1880,1930,1968,2003,2010,2023,2038,2079,2109,2155,2163,2183,2187,2251,2257,2267,2270,2320,2356,2396,245…	ADD3,ANKRD1,BUB3,CABLES1,CARKD,CDK14,COMMD7,CTGF,DHRS3,DKK1,DPYSL2,DTNA,DUSP6,EOMES,FGF2,FGFR2,FOXO1,GJA1,GNPTAB,GRHL2,HMG20A,ICMT,JARID2,KLF5,KLHL5,LEFTY2,LHPP,LINGO1,LRAT,LRRN1,NEBL,PRPF38A,RNF24,ROR1,SET,SFRP1,SKIL,SMIM3,SNURF,SPAG9,SULF1,TBL1XR1,TCF20,THBS2,TLE3,USP7,ZFP36L1	AASDH,ADD3,ANKRD1,ANO8,ARID1B,ATAD2,ATP6V1G1,B3GALT4,BAMBI,BMP7,BUB1B,BUB3,CA2,CA4,CABLES1,CACNA2D1,CAPZA2,CARKD,CDC14B,CDC7,CDK14,CDK17,CDYL,COL12A1,COMMD3,COMMD7,CPT1A,CSRNP2,CTGF,DHDDS,DHRS3,DKK1,DPH6,DPPA4,DPYSL2,DPYSL3,DTNA,DUSP12,DUSP6,ENPP2,EOMES,EPHA1,EXOSC9,FBXW11,FEZ1,FGF2,FGFR1,FGFR2,FOXO1,FRAT2,FUS,FZD10,GJA1,GNG10,GNPTAB,GRHL2,GTPBP3,H2AFJ,HAS2,HESX1,HHEX,HMG20A,HN1,ICMT,IFI16,IRX2,J…
MSigDB Perturbation	ISHIKAWA_STING_SIGNALING	Prmary innate immune response genes induced in 293T cells (embryonic kidney) by overexpression of STING (TMEM173) [GeneID=340061].	204	0.00126062	1	0.0207878	3.75589	2.12999	8	65	0.0034965	0.123077	4	9	9	3.15862e+28	31,586,1596,1723,2216,2263,2485,2504,2905,3357,3823,5787,5897,6206,6926,7681,7748,9897,10215,10410,10541,10682,10758,12557,13346,13976,13978,15334,17157,17785,17983,20003,20050,21338,21772,23121,23583,23636,23740,23790,24769,27707,28110,28931,30819,31194,33224,34838,37975,38522,40755,41047,42363,44468,47737,48359,48390,49266,51246,51730,54033,54808,65671,66696,68800	ADAR,CCL5,IRF1,IRF2	ADAR,CCL5,ENSG00000259529,IFNB1,IRF1,IRF2,IRF6,IRF7,IRF9
MSigDB Perturbation	WANG_RESPONSE_TO_GSK3_INHIBITOR_SB216763_DN	Genes down-regulated in RS4;11 cells (MLL, mixed lineage leukemia) in response to SB216763 [PubChemID=176158], an inhibitor of GSK3B [GeneID=2932].	205	0.00129849	1	0.0213078	1.33503	84.6424	113	2583	0.0493881	0.0437476	73	351	379	2,9,14,70,76,89,150,151,154,220,225,230,240,267,303,328,338,378,422,425,454,470,475,481,495,505,514,544,620,635,647,652,664,666,687,691,701,708,718,735,738,753,768,783,834,906,917,930,941,971,1029,1035,1040,1067,1085,1102,1113,1116,1145,1230,1234,1242,1257,1259,1290,1301,1306,1311,1338,1347,1370,1386,1403,1460,1479,1491,1502,1509,1516,1518,1519,1554,1613,1637,1639,1669,1672,1680,1707,1743,1802,19…	2,9,14,70,76,89,150,151,154,220,225,230,240,267,303,328,338,378,422,425,454,470,475,481,495,505,514,544,620,635,647,652,664,666,687,691,701,708,718,735,738,753,762,768,783,834,906,917,930,941,971,1005,1029,1035,1040,1060,1063,1067,1085,1102,1113,1116,1145,1222,1230,1234,1242,1257,1259,1290,1301,1302,1306,1311,1338,1340,1347,1370,1386,1403,1434,1460,1479,1491,1502,1509,1516,1518,1519,1554,1613,163…	ACSL1,ADCK3,ARHGAP21,ARHGAP44,C12orf44,CABLES1,CASC5,CCDC64,CCM2,CCNE1,CCR1,CCR2,CD180,CD38,CDC42EP3,CECR5,CENPV,CHST11,CITED2,DIAPH3,DNAJA1,DUSP6,EMP2,ETV5,EXOSC5,FAM136A,GINS1,H2AFZ,HELLS,HMGCS1,ITGA4,ITGA5,ITGB5,KIAA1524,KIF21B,LAS1L,LBR,LMO2,LPCAT1,LY6E,MCM5,MCM7,MELK,MLF1IP,MSN,MYC,NLRP3,PDK1,PELI2,PHLDA1,PIM1,PLXNA1,PSAT1,RAD51,RAD51AP1,RFC3,RHBDL3,RNF122,RPS6KA5,RRP7A,SEL1L3,SLC2A1,SLC2A3,…	ACAT2,ACSL1,ACSL3,ACTL6A,ACY1,ADCK3,AHSA1,ALDH1A3,ALDH1B1,ALOX12,ALYREF,ANKRD28,APBB1,ARHGAP21,ARHGAP44,ARL4C,ARRB1,ASF1B,ATAD2,ATAD3B,B4GALT2,BEX1,BLM,BRCA1,BRIP1,BUB1,BUB1B,BYSL,C10orf2,C11orf58,C11orf82,C12orf44,CABLES1,CASC5,CCDC64,CCM2,CCNA2,CCNE1,CCNE2,CCPG1,CCR1,CCR2,CD151,CD180,CD38,CDC25A,CDC42EP3,CDC45,CDC6,CDCA4,CDK2,CECR5,CENPH,CENPK,CENPM,CENPV,CEP76,CHAF1A,CHAF1B,CHST11,CITED2,CKS1B…
MSigDB Perturbation	DIRMEIER_LMP1_RESPONSE_LATE_DN	Cluster 4: genes down-regulated in B2264-19/3 cells (primary B lymphocytes) within 60-180 min after activation of LMP1 (an oncogene encoded by Epstein-Barr virus, EBV).	206	0.00130907	1	0.0213772	2.66252	4.88259	13	149	0.00568182	0.0872483	7	29	32	5.10646e+46	510,645,804,885,916,1382,1407,1482,1826,1883,1888,2512,2534,2592,2779,3168,3521,3982,5211,5758,5811,5837,6093,6309,6844,6876,7842,7886,8096,8377,9844,9930,9997,10329,11021,11212,11375,11798,12188,12453,13415,13489,13778,13830,14687,15190,15400,15478,16023,16096,16293,17342,17449,17992,18139,18153,18184,19499,19831,20344,20551,21198,22526,22961,23281,23592,23947,24344,26629,29145,29441,29790,29970…	BTG1,CHI3L2,HPCAL1,PSAP,RPLP0,UBC,WNT6	APOC4,ARF5,ARHGDIB,ASAH1,BTG1,CD27,CHI3L2,COX8A,FAU,GAPDH,HLA-DMA,HPCAL1,ID3,ISG15,LSM2,MAP4K1,PSAP,PSMB9,RING1,RPL29,RPLP0,RPS11,RPS5,ST5,TAF10,TXNIP,UBC,WAS,WNT6
MSigDB Perturbation	TERAO_AOX4_TARGETS_HG_UP	Genes up-regulated in Harderian gland tissue upon knockout of AOX4 [GeneID=71872].	207	0.00131304	1	0.0213385	2.3057	7.37303	17	225	0.00743007	0.0755556	10	30	30	1.33139e+58	133,139,149,300,483,593,720,922,988,1048,1056,1135,1430,1437,1704,1919,2063,2411,2856,2919,3255,3612,3884,3933,4209,4334,4418,4862,5469,5745,5947,6103,6137,6333,6684,6768,6959,7324,7660,7969,8073,8288,8501,8905,9457,10248,10357,10642,10862,10918,11001,11135,12808,12828,13201,13675,13776,13990,14058,14356,14377,14471,14815,14844,14931,14942,15092,15153,15463,15926,16160,16427,17635,18129,18255,184…	AP1S3,CYTH1,GNS,LMTK2,MFSD9,PAM,RAF1,RNF185,TMEM127,TXNDC5	ACSL6,AP1S3,BLOC1S5-TXNDC5,CEBPA,CTAGE5,CYTH1,GNA12,GNS,INTS4,LMTK2,MAP1LC3A,MFSD9,NAA60,NSF,PAM,PEA15,PEX5,RAF1,RNF185,RNF4,SBF2,SGPL1,SNX27,TMEM127,TMEM189,TMEM189-UBE2V1,TRAPPC10,TTC7A,TXNDC5,UBE2V1
MSigDB Perturbation	SIMBULAN_UV_RESPONSE_NORMAL_DN	Genes down-regulated in HFK cells (primary keratinocytes) in response to UVB irradiation.	208	0.00131522	1	0.0212711	1.95119	12.8127	25	391	0.0109266	0.0639386	10	33	33	94,96,110,115,325,481,499,504,544,584,616,677,718,811,836,982,1286,1350,1465,1802,1910,2165,2256,2309,2502	94,96,110,115,325,481,499,504,544,584,616,677,718,811,826,830,836,898,982,1286,1313,1350,1465,1786,1802,1910,2165,2256,2309,2502,2549,2855,2943,3089,3113,3238,3286,3530,3629,3786,3791,3798,3874,4050,4051,4062,4087,4104,4190,4328,4416,4516,4596,4737,4761,4815,4832,4908,5175,5269,5329,5542,5666,5742,6041,6066,6109,6480,6824,6881,7023,7032,7188,7213,7512,7861,7923,8000,8177,8347,9131,9224,9307,9584,…	DUSP7,ITGA6,MARCKS,MYC,PHLDA1,PRRC2C,RBMS1,RBPMS,THBS1,VEGFA	ADRB2,AHNAK,CCNF,CDH1,CNBP,DUSP7,EGFR,EMP1,ENC1,FAT2,GADD45B,GRB7,HAS2,ID1,ITGA6,ITGB4,MARCKS,MCL1,MN1,MYC,PHLDA1,PIP4K2B,PLEC,POLR2A,PRRC2C,PTP4A1,RBMS1,RBPMS,SF3A2,TACC1,THBS1,TP63,VEGFA
MSigDB Perturbation	SEKI_INFLAMMATORY_RESPONSE_LPS_UP	Genes up-regulated in hepatic stellar cells after stimulation with bacterial lipopolysacharide (LPS).	209	0.00132971	1	0.0214026	1.681	23.2005	39	708	0.0170455	0.0550848	22	75	75	72,84,140,169,467,485,510,563,589,619,627,660,705,850,951,961,1118,1248,1339,1372,1382,1412,1536,1605,1621,1694,1714,1744,1869,1929,2065,2082,2085,2271,2305,2351,2590,2699,2716	72,84,140,169,467,485,510,563,589,619,627,660,705,850,951,961,1118,1248,1339,1372,1382,1412,1536,1602,1605,1621,1694,1714,1744,1869,1929,2052,2065,2082,2085,2271,2305,2330,2351,2590,2638,2699,2716,2840,2846,2869,3159,3168,3208,3266,3518,3593,3666,3681,3764,3807,3851,3871,3927,4255,4331,4357,4390,4525,4607,4615,4684,4689,4828,4902,5030,5042,5132,5233,5327,5329,5545,5605,5764,5801,5911,5922,5949,59…	ACKR5,BIRC2,BMP2,BTG1,CD40,CD44,CSF1,EXOC3L4,GBP4,GCH1,GSAP,IER3,MAFF,NGFR,RAB20,REL,RIPK2,SH3PXD2B,SLC4A7,STX11,TNFAIP3,ZMYND15	ACKR5,ADAMTS7,BIRC2,BIRC3,BMP2,BTG1,C8orf4,CASP4,CCL2,CCL3,CCL7,CD40,CD44,CSF1,CXCL1,CXCL10,CXCL16,CXCL2,CXCL3,CXCL6,EGFR,EGR1,EGR2,EGR3,EREG,EXOC3L4,FAS,FOSL1,GADD45B,GBP1,GBP2,GBP4,GCH1,GPR68,GSAP,ICAM1,ICOSLG,IER3,JDP2,LIF,MAFF,NFKB2,NFKBIA,NFKBIE,NFKBIZ,NGFR,OSMR,PLK2,PLSCR1,PRRX1,PTPRE,RAB20,REL,RFX5,RIPK2,RND1,RSAD2,SELE,SH3PXD2B,SLC11A2,SLC15A3,SLC4A7,SLCO4A1,SOD2,STX11,TJP2,TLR2,TMEM2,TNF…
MSigDB Perturbation	TCGA_GLIOBLASTOMA_MUTATED	Genes significantly mutated in 91 glioblastoma samples.	210	0.00134148	1	0.0214892	3.39073	2.65429	9	81	0.00393357	0.111111	1	7	8	1.31185e+29	131,185,217,414,736,871,1374,1401,2469,2858,3136,4931,4932,5591,5754,6582,8579,8844,11344,11363,12399,12893,13195,14672,15306,15674,16008,16874,17280,17777,19248,19306,20333,20586,21121,24384,24688,24802,25802,26694,27053,27520,28254,28871,29417,30551,30731,32983,34365,35074,35578,36151,36718,37001,37227,37932,40285,41120,41207,41546,42516,44929,45204,45671,47349,47374,47844,49892,50556,50810,521…	PIK3R1	EGFR,NF1,PIK3CA,PIK3R1,PTEN,RB1,TP53
MSigDB Perturbation	MCBRYAN_TERMINAL_END_BUD_DN	The 'TEB profile genes': down-regulated during pubertal mammary gland development specifically in the TEB (terminal end bud) structures.	210	0.00134148	1	0.0214892	3.39073	2.65429	9	81	0.00393357	0.111111	1	6	6	1.82531e+32	18,253,1136,1164,1592,1927,2325,2429,2735,5331,5846,6048,6633,7904,8458,12196,14965,15913,16351,16900,17475,18143,18403,23690,24445,24898,26241,26550,26731,27920,28039,29403,30276,30277,31066,31154,31638,31851,32276,32418,34679,36626,36894,37451,38294,38352,41309,43473,44155,44350,44912,46110,47348,47951,48243,48696,49303,49638,49808,50327,50683,52140,52184,53566,54034,54919,55621,55659,56339,585…	NRIP1	CORO1A,ETS1,GSN,LCK,NRIP1,PHGDH
MSigDB Perturbation	MAHAJAN_RESPONSE_TO_IL1A_DN	Genes down-regulated in corneal fibroblasts after treatment with IL1A [GeneID=3552].	212	0.001353	1	0.0214692	1.70561	21.6931	37	662	0.0161713	0.0558912	22	71	76	1.22276e+133	122,276,292,309,328,333,389,413,427,552,630,740,793,891,910,1050,1177,1284,1324,1330,1395,1404,1515,1518,1556,1603,1759,1867,1886,1915,1921,1957,2098,2163,2264,2320,2356,2535,2683,2726,2733,2853,2858,2962,2982,3236,3329,3337,3525,3606,3613,3691,3730,3872,3886,3943,3982,3989,4049,4058,4247,4455,4509,4603,4613,4795,4843,4998,5042,5116,5262,5313,5412,5413,5516,5605,5926,6028,6200,6238,6287,6320,6371…	ACADVL,CTGF,CYP19A1,GALC,IDH2,ITGB5,LPP,MAPRE2,POLR1C,POSTN,PPP2R5C,PRKCI,RECK,RNF24,RYK,SF3B1,SLC25A12,SLC29A1,SLC2A3,SRI,VDAC2,ZBTB18	ACADVL,ACOX1,ADH5,ALDH3A2,ALDH7A1,ARL6IP5,ASAH1,CHST10,COL4A5,CRABP2,CTGF,CTNNAL1,CYP19A1,DYNC1LI2,DYRK2,EPHA2,EPHB4,F8,FOS,FOXN3,GALC,GALNT2,GRP,GSTA4,HSD11B1,HSPA4L,IDH2,IL11RA,ITGB5,KDELR3,LAMA4,LDLRAD4,LMNA,LPP,MAPRE2,ME1,MITF,MYH10,NEK4,PCNA,PEX3,PLS3,POLR1C,POSTN,PPP2R5C,PPT2,PRKCI,PTEN,RALA,RECK,RNF24,RPL3,RYK,SCP2,SF3B1,SLC25A12,SLC29A1,SLC2A3,SLIT3,SMC3,SORD,SRI,SYNJ2,TGFBR3,TOB2,UBE2N,U…
MSigDB Perturbation	HINATA_NFKB_TARGETS_KERATINOCYTE_UP	Genes up-regulated in primary keratinocytes by expression of p50 (NFKB1) and p65 (RELA) [GeneID=4790;5970] components of NFKB.	213	0.00136119	1	0.0214978	1.655	24.7734	41	756	0.0179196	0.0542328	22	84	91	8,31,94,205,344,429,498,556,563,586,619,662,957,965,1207,1217,1241,1350,1392,1530,1553,1596,1819,1904,2032,2079,2081,2146,2198,2214,2216,2263,2271,2281,2481,2544,2601,2604,2621,2670,2716	8,31,94,205,344,429,498,519,556,563,586,619,662,724,830,957,965,1207,1217,1241,1249,1313,1350,1380,1392,1530,1553,1596,1771,1819,1904,2032,2079,2081,2146,2198,2214,2216,2237,2263,2271,2281,2330,2481,2495,2544,2601,2604,2621,2638,2670,2716,2747,2933,3038,3111,3218,3221,3238,3241,3266,3322,3355,3453,3518,3568,3574,3629,3832,3871,3942,3965,4178,4188,4249,4368,4388,4397,4467,4482,4495,4516,4525,4636,…	BIRC2,BMP2,CCL20,CCL5,CCNH,CD83,CDKN1A,ESM1,GADD45A,IFNAR2,IL15,IL1A,IL1B,IRF1,MTSS1,RARRES1,RELA,RND3,SERPINE1,TNFAIP3,VEGFA,WNT5A	ARHGDIB,BCL2A1,BIRC2,BMP2,CCL2,CCL20,CCL5,CCNH,CD83,CD9,CDH3,CDKN1A,CFLAR,CSF2,CXCL10,CXCL11,CXCL3,CXCL6,CYP27B1,EFNA1,EGFR,ERCC1,ESM1,FN1,GABARAPL1,GADD45A,GBP1,GPRC5B,GSTO1,ICAM1,IFNAR2,IL15,IL1A,IL1B,IL1RN,IL32,IL6,IL7R,IL8,IRF1,ITGB6,KRT7,LITAF,MAP2K3,MAPK9,MMP14,MMP9,MT3,MTSS1,NFKB1,NFKBIA,NPR1,OLR1,PDPN,PLAT,PLAU,PNRC1,PTX3,RAC1,RAC2,RARRES1,RELA,RND3,SAA1,SERPINB2,SERPINE1,SLC7A2,SOD1,SOD2…
MSigDB Perturbation	HOLLEMAN_VINCRISTINE_RESISTANCE_ALL_UP	Genes distinguishing vincristine [PubChem=5978] resistant and sensitive ALL (B- and T-lineage ALL); here - genes up-regulated in the drug resistant samples.	214	0.00138314	1	0.0217425	2.23292	8.06118	18	246	0.00786713	0.0731707	8	25	25	9.63003e+61	96,300,335,549,713,830,831,922,976,988,1148,1255,1299,1620,1905,1919,2165,2369,2370,2448,2492,2906,3182,3595,3643,3821,3955,4316,4507,4832,5672,5975,6017,7241,7471,7607,8140,8234,8992,9077,9273,9639,9731,9952,10015,10023,10348,10651,10752,10862,11103,11401,11491,12824,13626,14067,14113,14248,14299,15171,15240,15563,16299,16881,16917,16930,17181,17269,17316,17587,17634,17786,18052,18087,18288,1861…	ARHGAP32,DSC3,GNS,PTP4A3,RBMS1,RUFY3,SPATA2,WIPF2	ABHD3,ARHGAP32,CALU,CBFA2T3,CREB3L2,DSC3,EPOR,FKBP1A,GNS,KDM4B,KPNA2,LBH,PISD,PPM1B,PTP4A3,RBMS1,RUFY3,SNRNP27,SPATA2,SSH1,TCEB3,TRIM24,WIPF2,YRDC,ZNF512B
MSigDB Perturbation	CORRADETTI_MTOR_PATHWAY_REGULATORS_DN	Major antagonists linked to the mTOR [GeneID=2475] signaling network.	215	0.00139384	1	0.0218087	3.69898	2.16276	8	66	0.0034965	0.121212	3	6	6	2.90352e+27	290,352,463,509,1939,2019,2388,2408,2913,4734,5098,5661,6617,7927,8102,8303,10719,11245,11391,12261,13049,13653,14040,16236,16873,17171,17461,18229,19270,19999,20472,21920,22598,22720,22908,27314,28521,32385,33527,33637,34379,35567,35648,38798,39733,40219,41422,41728,42512,44536,49330,49341,49380,49520,49526,49881,50872,51728,57098,57380,60134,60135,61609,64291,68039,68847	DDIT4,RHEB,RPTOR	DDIT4,PRKAA2,RHEB,RPTOR,SETD2,STK11
MSigDB Perturbation	ZHOU_INFLAMMATORY_RESPONSE_LPS_UP	Genes up-regulated in macrophages by P.gingivalis LPS (lipopolysaccharide).	216	0.00141072	1	0.0219706	1.308	97.0947	127	2963	0.055507	0.042862	87	360	378	3,43,60,74,119,140,148,153,203,208,252,308,342,347,367,403,420,485,493,496,529,530,537,543,555,584,604,625,628,641,646,696,701,705,719,752,764,773,812,825,855,877,888,897,928,987,1003,1056,1074,1086,1109,1120,1121,1123,1195,1207,1217,1219,1241,1244,1274,1286,1290,1292,1306,1312,1323,1339,1352,1358,1371,1372,1389,1392,1408,1511,1536,1611,1619,1621,1650,1666,1693,1711,1725,1734,1791,1796,1809,1860,…	3,43,60,74,119,140,148,153,203,208,252,308,342,347,367,403,420,485,493,496,519,529,530,537,543,555,584,604,625,628,641,646,696,701,705,706,719,752,764,773,812,825,845,855,877,888,897,928,934,987,1003,1056,1074,1086,1109,1115,1120,1121,1123,1195,1207,1217,1219,1241,1244,1274,1286,1290,1292,1306,1312,1323,1339,1345,1348,1352,1358,1371,1372,1389,1392,1408,1424,1475,1511,1532,1536,1543,1602,1611,1619…	ACKR5,ACSL1,ADAMTS20,ADH1B,ADM,AIPL1,ALX3,AQP4,ARHGAP31,ARL4D,ATP1B4,BRCA2,CA13,CCL20,CD44,CD55,CD80,DDX6,DENND5A,DMRTA1,DRAM1,EDN1,EFCAB4B,ELF3,FFAR2,FGFR1OP2,FZD1,GPR126,GPR135,GPR84,GRIA1,HELQ,HIPK2,HNRNPM,HRASLS2,HS3ST3B1,HTT,IER3,IL18,IL1B,IRF8,ITGA9,ITGB8,KIF1B,KITLG,KLF4,KLF5,LAMA3,LIMK2,MAFF,MARCKS,MXRA5,NAMPT,NCOA7,NETO1,NIPAL4,OTUD7B,PDLIM5,PPAP2B,PPP4R2,PTPN1,RAPGEF2,REL,RELA,RHOBTB3,R…	ABCC11,ABL2,ACKR5,ACOT6,ACSL1,ADAM17,ADAM20,ADAMTS20,ADAMTS5,ADH1B,ADM,AFF4,AGBL5,AHNAK2,AIPL1,AKAP1,ALX3,ANGPTL1,ANKS6,AQP4,ARHGAP31,ARID5B,ARL4D,ART1,ATP11C,ATP1B4,ATP2B1,ATP2B2,B4GALT1,BAMBI,BCL11A,BCL2L1,BHLHB9,BRCA2,BRICD5,BTBD9,BTG2,C14orf1,C2orf83,CA13,CADPS,CAMK1G,CAPN6,CASC1,CAST,CATSPERG,CBLB,CCL18,CCL20,CCL23,CCL4,CCL8,CD44,CD55,CD80,CDC42EP4,CDH15,CDH19,CDON,CFTR,CH25H,CHCHD5,CLDN1,CL…
MSigDB Perturbation	ZHAN_MULTIPLE_MYELOMA_MS_UP	Top 50 up-regulated genes in cluster MS of multiple myeloma samples with characteristic expression spike of WHSC1 [GeneID=7468].	217	0.00143643	1	0.0222679	1.81646	16.5156	30	504	0.0131119	0.0595238	16	42	44	18,44,69,104,116,253,321,656,838,1057,1061,1136,1164,1276,1324,1547,1549,1592,1794,1847,1924,1927,1928,2179,2231,2320,2325,2356,2429,2735	18,44,69,104,116,253,321,656,838,1057,1061,1136,1164,1276,1324,1547,1549,1592,1780,1794,1847,1924,1927,1928,2179,2231,2320,2325,2356,2429,2691,2709,2735,3091,3334,3403,3464,3623,3705,3710,3773,4327,4460,4496,4649,4664,4840,5076,5331,5546,5548,5737,5870,5989,6002,6084,6085,6096,6238,6397,6614,6958,7220,7511,7697,7872,7904,8035,8040,8053,8458,8655,8962,9028,9232,9322,9339,9351,9460,9516,9885,9994,1…	CLIC6,DTNA,FAM171A1,FZD2,KLHL13,MYO10,MYRIP,NRIP1,PALLD,PBX1,PPM1H,SERPINE2,SPRY2,TEAD1,ZNF503,ZNF521	AGAP1,BACE2,BEND7,CLEC11A,CLGN,CLIC6,CST3,DSEL,DSG2,DTNA,FAM171A1,FGFR3,FZD2,FZD8,JAM3,KLHL13,LARP6,LRP12,MAGI1,MARK1,MITF,MYO10,MYRIP,NAP1L3,NGFRAP1,NRIP1,PALLD,PBX1,PCSK5,PPM1H,RAI2,RNF32,SERPINE2,SPRY2,TCEAL2,TEAD1,TMEM176A,TRIM58,VWA5A,WHSC1,ZNF503,ZNF521
MSigDB Perturbation	QI_PLASMACYTOMA_UP	Up-regulated genes that best disciminate plasmablastic plasmacytoma from plasmacytic plasmacytoma tumors.	218	0.00143982	1	0.0222182	1.36474	71.076	97	2169	0.0423951	0.0447211	58	251	260	21,31,76,80,81,115,147,150,288,307,347,356,446,473,510,527,543,584,586,605,625,627,650,734,742,750,778,817,836,838,846,867,891,906,982,986,1033,1086,1106,1111,1201,1206,1212,1221,1242,1263,1286,1288,1321,1335,1382,1433,1444,1466,1500,1501,1512,1522,1558,1596,1609,1631,1637,1706,1723,1742,1772,1790,1814,1946,2001,2021,2062,2100,2122,2186,2201,2216,2256,2263,2276,2309,2349,2373,2384,2386,2409,2467,…	21,31,76,80,81,115,147,150,288,307,347,356,446,473,510,527,543,584,586,605,625,627,650,734,742,750,778,817,836,838,846,867,891,906,982,986,1033,1086,1106,1111,1201,1206,1209,1212,1221,1242,1263,1286,1288,1321,1335,1382,1433,1444,1456,1466,1500,1501,1512,1522,1543,1558,1596,1609,1631,1637,1645,1651,1706,1723,1742,1772,1786,1790,1814,1876,1946,2001,2021,2062,2089,2100,2122,2178,2186,2201,2216,2256,…	ACTR2,ANKRD1,ARAP2,BCL2,BHLHE40,BTG1,CASP7,CCL5,CCR1,CCR2,CCR5,CD40,CD53,CDC42EP3,DPP4,FCER2,HPS3,IFI35,IGF1,IL18,IL21R,IL5RA,IRF1,IRF2,IRF8,ITGA6,ITGB7,LAT,MARCKS,MYB,MYCN,MYO10,NFAM1,NTN1,PLEK,PLEKHO1,PTGES,PTGS1,PTPN1,RABEP2,RASSF2,RGS16,RPS6KA1,RRAS2,SLA,SNX10,SNX2,SPIB,SPIB,TFEB,TGM2,TMOD3,TMSB10,TNFAIP3,UBE2D1,VAV1,ZBTB18,ZFP36L1	ABI3,ACTG2,ACTR2,ADCY7,ALOX5AP,ANKRD1,ANXA11,AOC1,APAF1,ARAP1,ARAP2,ARF5,ARHGDIB,ARL6IP1,ARL6IP5,ARPC4,ARRB1,AVIL,AXL,BAG2,BATF,BCL2,BDKRB2,BHLHE40,BLK,BTG1,CAP1,CAPG,CAPN1,CARD11,CASP1,CASP3,CASP4,CASP6,CASP7,CCL19,CCL3,CCL4,CCL5,CCR1,CCR2,CCR5,CD19,CD22,CD244,CD37,CD3D,CD3E,CD3G,CD4,CD40,CD47,CD53,CD5L,CD7,CD79A,CD82,CDC42EP3,CDC42SE1,CIITA,CISH,CLEC4E,CLU,CNN2,CNP,CNR2,CSF1R,CST7,DAPP1,DDT,DEK…
MSigDB Perturbation	SCHAEFFER_PROSTATE_DEVELOPMENT_6HR_DN	Genes down-regulated in the urogenital sinus (UGS) of day E16 females exposed to the androgen dihydrotestosterone [PubChem=10635] for 6 h.	219	0.00145691	1	0.0223792	1.23664	155.26	192	4738	0.0839161	0.0405234	102	496	516	14,15,18,38,63,64,81,85,113,115,128,136,142,145,163,172,174,191,202,205,209,210,214,223,225,230,235,236,240,244,253,255,266,281,291,302,305,332,360,361,375,377,394,398,419,424,436,449,450,455,490,510,515,518,529,538,545,598,616,641,645,648,656,676,711,729,733,751,754,765,767,777,803,804,811,812,827,836,916,980,982,1010,1033,1052,1065,1089,1136,1143,1146,1157,1164,1174,1182,1187,1231,1239,1243,124…	14,15,18,38,63,64,81,85,113,115,128,136,142,145,163,172,174,191,202,205,209,210,214,223,225,230,235,236,240,244,253,255,266,281,291,302,305,332,360,361,375,377,394,398,419,424,436,449,450,455,490,510,515,518,529,538,545,598,616,641,645,648,656,676,710,711,729,733,751,754,765,767,777,803,804,811,812,827,836,916,980,982,1010,1033,1052,1065,1087,1089,1136,1141,1143,1146,1157,1164,1174,1182,1187,1189…	AFF3,AGO1,AGO2,ARHGEF2,BAZ2B,BTG1,CALM1,CAPRIN1,CASP7,CD2AP,CDK14,CHD1,CNOT11,CSRP1,DDX6,DHRS3,DNMT3A,DPYSL2,DUSP7,ELOVL5,FAM96A,FGFR1OP2,FRYL,GADD45G,GCC2,GOLPH3,GPC1,GSR,GTF2I,H3F3A,HIST3H2A,HMGB1,HNRNPC,IER2,IGF1R,ILF3,ITGA6,ITGB5,JARID2,KANSL1,KCNK1,KHDRBS3,KLF3,KLHDC10,KMT2C,KRAS,LACTB,LPP,LY6H,MACF1,MARCH7,MARCKSL1,MDFI,MGAT1,MPRIP,NDUFA4,NEK7,NFIA,NRIP1,PALLD,PPP2R5E,PRRC2C,PSAP,PSMB2,PTMA…	AAMP,ABHD17C,ABLIM1,ADAM17,ADAMDEC1,ADIPOR1,ADNP2,AFF3,AFTPH,AGO1,AGO2,AHNAK,AKTIP,ALDH1A1,ALYREF,ANKRD11,APH1A,APP,APPBP2,ARF3,ARHGAP10,ARHGAP29,ARHGEF2,ARID5B,ARPC4,ATP1B1,ATP5I,AUTS2,B4GALT2,BAZ2B,BCKDHA,BCL2L1,BCL2L12,BCL7A,BCL9,BCLAF1,BMP4,BRD4,BTBD2,BTG1,BZW1,C11orf34,C11orf92,C19orf10,C1orf116,C1orf85,CABLES2,CALD1,CALM1,CALM2,CALM3,CALR,CAMK1D,CAMK2N1,CANX,CAPRIN1,CASP7,CAT,CBX3,CBX4,CCNI…
MSigDB Perturbation	KAPOSI_LIVER_CANCER_MET_DN	Selected down-regulated MET [GeneID=4233] target genes from a classifier of hepatocellular carcinoma (HCC) cases; associated with poor survival.	220	0.00146371	1	0.0223814	3.34938	2.68706	9	82	0.00393357	0.109756	1	6	6	1.31185e+29	131,185,217,414,736,871,1374,1401,2469,3136,4789,6582,7038,8153,8579,8844,11363,12399,12893,12944,13195,13997,15674,18791,18891,19306,20915,24688,24802,25802,26694,28254,28871,29337,29417,30551,30731,32983,34365,35074,37227,37932,38297,38832,40054,40589,41207,41546,42263,43466,43838,44929,45671,46122,46434,46849,47374,47532,47844,48148,49649,49892,50556,50810,51729,52251,52438,52989,55970,57116,5…	PIK3R1	ALDH1A1,ALDH6A1,EPHX1,EPHX2,GSTT1,PIK3R1
MSigDB Perturbation	DACOSTA_UV_RESPONSE_VIA_ERCC3_DN	Genes down-regulated in fibroblasts expressing mutant forms of ERCC3 [GeneID=2071] after UV irradiation.	221	0.001464	1	0.0222847	1.14863	346.5	398	10574	0.173951	0.0376395	242	837	840	4,6,12,13,17,18,37,42,55,58,59,60,73,96,111,115,119,122,132,148,151,152,153,161,169,176,200,201,220,222,227,244,252,253,255,258,265,268,271,275,277,283,289,293,299,306,322,325,327,336,341,343,347,351,369,371,373,375,378,389,400,401,403,408,409,420,441,444,447,448,449,453,455,467,468,481,488,492,493,500,518,525,527,528,533,541,542,562,569,578,580,592,608,625,629,630,635,636,639,646,654,663,673,689…	4,6,12,13,17,18,37,42,55,58,59,60,73,96,111,115,119,122,132,148,151,152,153,161,169,176,200,201,220,222,227,244,252,253,255,258,265,268,271,275,277,283,289,293,299,306,322,325,327,336,341,343,347,351,369,371,373,375,378,389,400,401,403,408,409,420,441,444,447,448,449,453,455,467,468,481,488,492,493,500,513,518,525,527,528,533,541,542,562,569,578,580,592,601,608,625,629,630,635,636,638,639,646,654…
36315,36316,36318,36341,36343,36371,36379,36385,36402,36408,36415,36417,36429,36435,36440,36442,36450,36459,36464,36466,36467,36478,36483,36484,36494,36505,36516,36531,36532,36547,36552,36553,36559,36564,36569,36583,36584,36594,36610,36614,36617,36620,36628,36630,36636,36637,36646,36657,36658,36659,36673,36674,36676,36702,36703,36705,36726,36737,36739,36744,36746,36765,36779,36785,36792,36797,368…	ABI1,ACBD3,ACSL4,ACVR1,ADARB1,ADCY9,ADNP,AFAP1,AFF1,AGO2,AKAP10,AKAP13,ALCAM,ANAPC10,ANKRD17,AP3B1,ARAP2,ARHGAP12,ARHGEF10,ARHGEF7,ASAP2,ASXL1,ATF2,ATP11B,ATP2B4,ATP6V1H,ATXN2,AUH,BAZ1B,BAZ2B,BBX,BCAR3,BHLHE40,BRCA2,C2CD5,CAND1,CCDC6,CD2AP,CDC27,CDC42BPA,CDK13,CDK19,CERS6,CHD1,CHST3,CLASP1,CLINT1,CNOT4,CTBP2,CTGF,CUL1,CXCL12,CYTH1,DAAM1,DDX10,DENND5A,DKK1,DLG1,DNAJB6,DOPEY2,DUSP4,EFNA5,EIF4G3,EPH…	ABCC1,ABCE1,ABI1,ABLIM3,ACAP2,ACBD3,ACSL3,ACSL4,ACVR1,ADAM10,ADAM17,ADARB1,ADCY9,ADNP,ADORA2B,AFAP1,AFF1,AGAP1,AGFG1,AGO2,AHCTF1,AHDC1,AKAP10,AKAP11,AKAP13,AKAP9,ALCAM,AMPH,ANAPC10,ANKLE2,ANKMY2,ANKRD17,ANKRD28,ANKS1A,AP3B1,APBB2,APC,APP,APPBP2,AQR,ARAP2,ARFGEF1,ARHGAP11A,ARHGAP12,ARHGAP19,ARHGAP19-SLIT1,ARHGAP29,ARHGAP35,ARHGEF10,ARHGEF7,ARID4A,ARID5B,ARIH1,ARNT2,ASAP2,ASCC3,ASXL1,ATAD2B,ATF2,AT…
MSigDB Perturbation	WIERENGA_STAT5A_TARGETS_GROUP1	Genes up-regulated to their maximal levels in CD34+ [GeneID=947] cells by intermediate activity levels of STAT5A [GeneID=6776]; predominant long-term growth and self-renewal phenotype.	222	0.00149941	1	0.0227207	1.52722	36.0132	55	1099	0.0240385	0.0500455	25	127	129	15,16,18,21,68,113,128,145,174,207,210,253,290,307,332,415,419,473,509,544,569,650,714,718,756,778,796,838,939,1039,1106,1136,1212,1221,1329,1370,1394,1397,1576,1592,1660,1668,1744,1802,1868,1939,1988,2189,2257,2413,2467,2486,2565,2688,2711	15,16,18,21,68,113,128,145,174,207,210,253,290,307,332,415,419,473,509,544,569,650,710,714,718,756,778,796,826,838,925,939,1039,1063,1096,1106,1136,1212,1221,1329,1370,1394,1397,1576,1592,1660,1668,1670,1744,1802,1834,1868,1939,1988,2162,2189,2257,2331,2413,2467,2486,2565,2688,2711,2772,2806,2816,2898,2934,3002,3248,3387,3411,3527,3597,3683,3804,3870,3928,3944,4011,4013,4051,4190,4320,4339,4411,4…	A4GALT,ADM,ARL4A,BBX,CD40LG,CTNS,CTSZ,CYSTM1,DDIT4,DHRS3,DPYSL4,F2RL1,FCER2,GBP4,IL4I1,MYO10,NAAA,PHLDA1,PIM1,SAMSN1,SLC6A9,ST3GAL5,TGM2,TLE3,TMEM116	A4GALT,ADM,AGPAT9,AMACR,ARL4A,BATF3,BBX,CBS,CD1A,CD40LG,CDHR1,CDKN1C,CERCAM,CFH,CISH,CPXM1,CST7,CTNS,CTSH,CTSZ,CTXN1,CYSTM1,DAB2,DAPK1,DCPS,DDIT4,DDN,DHRS3,DPYSL4,DUSP5,ENC1,ENPP3,F2RL1,FAM126B,FAM129B,FAM131A,FAM150B,FBXO6,FCER2,FGF11,FNDC3B,GATA2,GBP4,GGT5,GPR114,GYPB,HBZ,HILPDA,HSPA2,HSPA6,IGFBP4,IGFBP5,IL18RAP,IL3RA,IL4I1,IL4R,IQCJ-SCHIP1,ITGA2,KIAA0226,KISS1R,KRBA1,LTB,MAP1A,MEX3D,MOSPD3,MTH…
MSigDB Perturbation	KAN_RESPONSE_TO_ARSENIC_TRIOXIDE	Genes changed in U373-MG cells (malignant glioma) upon treatment with arsenic trioxide [PubChem=14888], a chemical that can cause autophagic cell death.	223	0.00150555	1	0.0227116	1.55479	32.8018	51	1001	0.0222902	0.0509491	24	117	121	75,89,110,133,149,239,241,267,290,426,440,499,504,508,509,544,564,615,622,666,677,718,735,749,899,912,1003,1027,1190,1230,1241,1272,1430,1500,1509,1514,1555,1706,1802,1845,1910,1931,1939,1986,2225,2260,2295,2390,2486,2527,2609	75,89,110,133,149,239,241,267,290,426,440,499,504,508,509,544,564,615,622,666,677,718,735,749,845,899,912,934,1003,1027,1190,1230,1241,1272,1430,1453,1500,1509,1514,1555,1706,1802,1845,1910,1931,1939,1986,2225,2260,2268,2295,2335,2390,2486,2508,2527,2609,2778,2816,2934,2998,3027,3040,3077,3114,3276,3286,3416,3539,3619,3676,3682,3695,3697,3795,3798,3805,3870,3983,4004,4051,4087,4088,4094,4188,4190…	ADM,ANKRD1,ATF3,BNIP3L,DCBLD2,DDIT4,DKK1,EFNB2,FAM162A,GDF15,KIF20A,KLF12,LMNB1,MCM7,PHLDA1,PSAT1,PTHLH,SCG2,SEL1L3,SERPINE1,SOCS2,THBS1,VAT1,WIPI1	ADM,AK4,AKR1C1,AKR1C2,AKR1C3,ANKRD1,ARHGAP29,ARHGAP6,ARL4C,ASNS,ATF3,ATP6V0E1,BNIP3L,BOP1,C6orf15,CAV2,CBS,CCPG1,CLEC2B,CRYAB,CTH,CXCL14,DCBLD2,DDIT3,DDIT4,DIRAS3,DKK1,DLGAP5,DPYSL3,EFNB2,EIF4G1,ENO2,FABP7,FAM162A,FAM64A,FBXO5,FEZF2,GABARAPL1,GDF15,GFPT2,GLRX,GPM6B,GPNMB,GPR65,GRN,GSTM3,HEY1,HMOX1,HSPA6,ID2,IGF2BP3,IGFBP5,IL7R,IL8,INSIG1,JAG1,JUN,KCTD12,KIF20A,KLF12,LDLR,LGALS8,LMNB1,MAP1LC3B,MCM…
MSigDB Perturbation	TAKEDA_TARGETS_OF_NUP98_HOXA9_FUSION_8D_UP	Genes up-regulated in CD34+ [GeneID=947] hematopoetic cells by expression of NUP98-HOXA9 fusion [GeneID=4928;3205] off a retroviral vector at 8 days after transduction.	224	0.00156469	1	0.0234983	1.43796	50.0711	72	1528	0.0314685	0.0471204	31	146	149	5,8,12,15,49,82,110,113,125,128,135,136,145,157,174,190,210,211,228,230,233,248,290,325,332,337,356,419,498,499,504,509,534,585,615,656,677,682,733,781,824,859,890,912,965,986,1039,1118,1306,1361,1373,1493,1508,1521,1553,1576,1606,1648,1728,1800,1819,1904,1910,1928,1939,1998,2211,2231,2281,2307,2601,2675	5,8,12,15,49,82,110,113,125,128,135,136,145,157,174,190,210,211,228,230,233,248,290,325,332,337,356,419,498,499,504,509,534,585,611,615,656,677,682,733,776,781,824,859,890,905,912,965,986,1039,1063,1117,1118,1204,1306,1313,1361,1373,1493,1508,1521,1553,1576,1591,1602,1606,1632,1648,1728,1800,1819,1904,1910,1928,1939,1998,2004,2061,2211,2231,2281,2291,2293,2303,2307,2381,2601,2675,2996,3001,3020,3…	ADRB1,ASB2,C3orf80,DDIT4,DEFB1,DHRS3,F2R,FOXC1,GCH1,GDF15,GJA1,HIC1,HOXA3,HOXA5,HS3ST3B1,LY6E,MAP7,MECOM,MTSS1,MYCN,OLFM3,PALLD,RBPMS,RPS6KA5,RXFP1,SDSL,SLC6A13,SOX4,SPOCK1,THBS1,ZNF503	ABCB1,ADCYAP1,ADRB1,ALDH1A1,AMMECR1,ANGPT1,APOC1,ASB2,ATP7B,AUTS2,BDNF,C19orf77,C3orf80,CALB1,CCR7,CDH1,CELA2A,CHST2,CLEC2B,CMBL,CNKSR3,CRISP3,CTSG,DDIT4,DDX58,DDX60,DEFB1,DENND6B,DHRS3,DLC1,DNAJC6,EIF2AK2,ENPP2,F2R,FAT1,FGF18,FHL2,FLT3,FOXC1,GAD1,GBP1,GCH1,GDF15,GDPD1,GJA1,GPR124,GPR18,GZMB,HBB,HBD,HERC5,HERC6,HIC1,HOPX,HOXA3,HOXA5,HOXB3,HS3ST3B1,IDO1,IFI27,IFI44,IFI44L,IFI6,IFIH1,IFIT1,IFIT2,IF…
MSigDB Perturbation	HEIDENBLAD_AMPLICON_8Q24_DN	Down-regulated genes whose expression is associated with amplification of the 8q24 chromosome region in pancreatic cancer cell lines.	225	0.00157084	1	0.0234857	1.87261	14.4184	27	440	0.0118007	0.0613636	14	43	44	6,17,42,163,265,283,398,447,549,658,678,715,744,857,878,976,1121,1134,1262,1495,1659,1809,2193,2286,2454,2552,2702	6,17,42,163,265,283,398,447,549,658,678,715,744,857,878,976,1121,1134,1262,1495,1659,1809,1967,2006,2193,2286,2454,2465,2552,2702,2958,3152,3160,3344,3396,3438,3551,3602,3675,3837,4226,4246,4258,4286,4294,4600,4610,4619,4685,4759,4782,4788,5358,5512,5523,5667,5844,5962,6198,6204,6256,6276,6384,6668,6869,6953,6981,7235,7407,7471,7488,7591,7877,7950,8021,8022,8410,9243,9244,9376,9438,9551,9675,9823…	COMMD6,COPB2,DNAJB6,GPC1,HIVEP3,IRAK3,MDK,MYOF,NT5C2,PRICKLE1,SLC9A8,TMEM242,TULP4,VAPA	ADAM8,ATF4,BTAF1,BTBD9,CNKSR3,COL5A2,COMMD6,COPB2,DNAJB6,ENSG00000256500,ETHE1,FZD4,GPC1,GSTK1,HIVEP3,HPS1,IRAK3,KCNN4,KLC1,LAPTM5,LRP10,MDK,MMRN2,MYL12A,MYOF,NAPG,NEK6,NT5C2,NT5DC1,PRICKLE1,PYROXD2,RABEPK,RBM33,SAP18,SEC63,SLC14A1,SLC9A8,SRSF11,TMEM242,TPP1,TULP4,VAPA,XRCC1
MSigDB Perturbation	EBAUER_TARGETS_OF_PAX3_FOXO1_FUSION_UP	Genes up-regulated in Rh4 cells (alveolar rhabdomyosarcoma, ARMS) after knockdown of the PAX3-FOXO1 [GeneiD=5077;2308] fusion protein by RNAi for 72 hr.	226	0.00157718	1	0.0234762	1.41516	55.1175	78	1682	0.0340909	0.0463734	43	192	204	8,21,46,57,115,119,126,139,150,171,290,307,390,471,473,474,498,509,510,517,580,599,642,649,650,699,778,823,825,836,838,877,940,965,982,1106,1112,1147,1180,1206,1221,1274,1290,1382,1386,1419,1541,1553,1609,1635,1660,1699,1714,1819,1836,1856,1904,1907,1986,2134,2141,2161,2214,2245,2256,2266,2280,2281,2286,2287,2309,2467,2493,2502,2543,2544,2601,2603	8,21,46,57,115,119,126,139,150,171,290,307,390,471,473,474,498,509,510,517,580,599,642,649,650,699,778,823,825,836,838,877,940,965,979,982,1063,1106,1112,1141,1147,1151,1180,1206,1221,1266,1274,1290,1382,1386,1419,1541,1553,1609,1635,1660,1699,1701,1714,1798,1819,1836,1837,1848,1856,1902,1904,1907,1958,1986,2134,2141,2161,2214,2245,2256,2265,2266,2280,2281,2286,2287,2309,2332,2465,2467,2493,2502,…	ACAA2,ACSL1,ARHGEF6,ARSF,ASCC1,ATF7IP2,CALCRL,CASQ2,CCDC169-SOHLH2,CCR5,DCN,DNAJC7,EHBP1L1,HBEGF,HIVEP3,INPP4B,ITGA6,KLF6,LRTM1,MACF1,MKRN2,MTSS1,MYO10,NEBL,NENF,OSBPL10,PAPPA2,PDE4DIP,PDLIM5,PLEK,PNOC,PRKCQ,PRRX2,RARB,RUSC2,SGCG,SLC12A2,SST,TGM2,TNNI2,TNS1,UTRN,XIAP	ABLIM3,ACAA2,ACBD4,ACHE,ACSL1,ACTA2,ADAM30,ADAM8,ADAP1,AEBP1,AGL,AGRN,AHNAK2,AK1,AKAP1,ALDH1A2,ANKZF1,APOBEC2,AQP6,ARHGEF6,ARSF,ASCC1,ATF7IP2,ATP2C2,ATP6V0A4,BBS9,BCAN,BICD1,BIN1,C1R,C21orf62,C2CD2L,CACNB1,CALCRL,CAMK2B,CASP10,CASQ2,CCDC169-SOHLH2,CCR5,CD36,CDC42EP2,CELA3B,CHODL,CLSTN2,COL16A1,COL1A1,COL6A3,CRYAB,CTF1,CX3CL1,CXCL10,CYP2W1,DCN,DCX,DES,DMPK,DNAJC7,DOK1,DTX3,EGLN3,EHBP1L1,EPB41L3,EP…
MSigDB Perturbation	APPIERTO_RESPONSE_TO_FENRETINIDE_UP	Genes up-regulated in A2780 cells (ovarian carcinoma) exposed to fenretinide [PubChem=1744].	227	0.00158653	1	0.0235114	2.26543	7.50411	17	229	0.00743007	0.0742358	5	36	38	5,82,125,135,157,211,233,534,615,682,912,1186,1539,1800,1870,2041,2184	5,82,125,135,157,211,233,534,615,682,776,912,960,1186,1539,1800,1870,2041,2184,2560,3047,3592,4116,4254,4264,4451,4654,4899,4940,4943,5743,6036,6055,6168,6627,6948,6960,7039,7569,7674,8058,8388,8496,8774,8777,9342,9484,9985,10068,10171,10553,11047,11146,11164,11263,11938,12150,12495,12815,13226,13268,13637,14001,14205,14454,14719,15325,15687,16756,17076,17320,17675,18073,18524,18567,19334,19494,1…	GDF15,ITGAX,PDZD2,SRR,UBQLN1	ABHD4,AHSA1,AKAP9,BRD2,CCL13,CCNJL,CCNL2,CYB5R1,CYR61,FOXJ3,GAD1,GDF15,HSPA4,HSPA8,ITGAX,KIF21A,MGP,MMP3,MYADM,MYO1E,NID1,PALM3,PDZD2,PRKACB,PSMA7,PSMC4,RRP12,SDC4,SRR,STXBP3,TFRC,TM4SF1,TSC2,UBQLN1,UCHL1,ZNF672
MSigDB Perturbation	MARTINELLI_IMMATURE_NEUTROPHIL_UP	Neutrophil-specific genes up-regulated in comparison of immature with mature neutrophils.	228	0.00158654	1	0.0234084	4.69486	1.27799	6	39	0.00262238	0.153846	1	12	13	2.13075e+18	2.13075e+178	BPI	AZU1,BPI,CAMP,CTSG,CYBB,DEFA1,DEFA1B,DEFA3,DEFA4,LCN2,MMP8,MPO
MSigDB Perturbation	SMID_BREAST_CANCER_RELAPSE_IN_BONE_DN	Genes down-regulated in bone relapse of breast cancer.	229	0.00162483	1	0.0238686	1.33155	82.6107	110	2521	0.0480769	0.0436335	61	281	298	49,51,79,84,94,108,115,158,202,204,244,274,294,328,335,373,383,386,399,410,460,463,482,502,533,546,563,577,581,597,659,705,713,735,739,804,808,829,832,836,885,916,956,961,982,1003,1079,1100,1130,1148,1153,1180,1190,1217,1234,1272,1283,1299,1300,1336,1350,1392,1407,1441,1478,1482,1520,1620,1621,1631,1633,1676,1687,1690,1738,1742,1844,1853,1869,1873,1913,2011,2019,2028,2065,2081,2098,2168,2256,2266…	49,51,79,84,94,108,115,158,202,204,244,274,294,328,335,373,383,386,399,410,460,463,482,502,533,546,563,577,581,597,659,688,705,706,713,735,739,740,745,804,808,829,832,836,885,916,956,961,982,1003,1062,1079,1087,1100,1130,1148,1153,1180,1190,1217,1234,1252,1272,1283,1299,1300,1336,1350,1380,1392,1402,1407,1441,1453,1474,1478,1482,1520,1538,1543,1618,1620,1621,1631,1633,1676,1687,1690,1718,1738,174…	ADD2,ANP32E,BBOX1,CCL20,CD44,CEACAM1,CHI3L2,CHST3,COL4A2,CP,CYP26B1,DKK1,DSC2,DSC3,EDN1,EN1,ENO1,EPHB3,FERMT1,FGFBP1,FOXC1,FZD7,GABRP,HAPLN1,HPCAL1,IMPA2,ITGA6,KHDRBS3,KLF5,KLF6,KRT17,LEFTY2,LMO4,LTBP1,MCM5,MFGE8,MMP7,PDE9A,PDK1,PICALM,PLA2G4A,PLEKHB1,PSAT1,PTP4A3,RARRES1,RHEB,RRAGD,SFRP1,SLC2A3,SOX9,SPIB,SPIB,ST8SIA1,STXBP6,SYCP1,TFCP2L1,TNFRSF21,TTLL4,VEGFA,WNT5B,ZFP36L2	ACAN,ACE2,ACTG2,ACTL8,ADD2,AKR1C1,AKR1C2,AMD1,ANP32E,APBA2,AQP5,ARL4C,ART3,ATP6V1A,BAG2,BBOX1,BCL11A,BGN,BMP1,C6orf62,CA9,CALU,CAPN6,CASK,CCL20,CD22,CD44,CD52,CDC5L,CDH19,CDKAL1,CDKN2A,CDV3,CEACAM1,CEP170,CHI3L2,CHRM3,CHST3,CKAP2,CLDN1,CLDN10,CLIC4,COCH,COL11A2,COL2A1,COL4A2,COL9A3,CP,CRLF1,CRYAB,CTAG2,CWF19L1,CXCL5,CXCR4,CYBA,CYP26B1,DKK1,DLAT,DNAJB4,DSC2,DSC3,DSG1,EDN1,EGFR,EIF5A,ELF5,ELN,EN1,E…
MSigDB Perturbation	LEIN_ASTROCYTE_MARKERS	Genes enriched in astrocytes in the adult mouse brain identified through correlation-based searches seeded with the astrocyte cell-type specific gene expression patterns.	230	0.00165184	1	0.02416	2.09736	9.53579	20	291	0.00874126	0.0687285	10	41	42	1.53421e+72	153,420,604,764,781,829,888,1031,1245,1247,1518,1563,1606,1632,1648,1678,1728,1888,2030,2088,2184,2402,2484,2607,2675,2802,3228,4306,4789,4908,5075,5188,5288,5520,5541,5669,5730,5940,6109,6122,6440,6519,6586,6633,6834,6965,7401,7710,7915,8142,8468,8896,9202,9235,9812,10566,10854,10904,11015,11051,11368,11406,11440,11558,11676,11970,11978,12299,12304,12492,12842,13099,13505,13587,13661,13726,14205…	AQP4,GJA1,GPR37L1,ITGAM,ITGB5,MFGE8,PPAP2B,PRDX6,S1PR1,SEPT4	ALDOC,APOE,AQP4,ATP13A5,ATP1A2,ATP1A4,BCAN,C1QA,CD63,CLDN5,CLU,CST3,DBI,DIP2A,EMX2,GFAP,GJA1,GLDC,GLUL,GPR37L1,GSN,HEPACAM,ID3,ITGAM,ITGB5,MAGI1,MATN4,MFGE8,MLPH,MT1A,NCAN,PLA2G7,PPAP2B,PRDX6,S1PR1,SELPLG,SEPT4,SLC6A20,SPARC,SPARCL1,STAB1
MSigDB Perturbation	ROETH_TERT_TARGETS_UP	Genes up-regulated in T lymphocytes overexpressing TERT [GeneID=7015] off a retrovirus vector.	231	0.0016542	1	0.0240897	2.86908	3.83398	11	117	0.00480769	0.0940171	3	14	14	1.82539e+39	18,253,944,1136,1164,1300,1592,1927,2325,2429,2735,3197,3594,3851,4006,5011,5331,6413,6928,7773,7904,8458,10362,10406,13096,13609,14459,15209,15439,15467,15590,15623,16305,17475,17564,18143,18403,18405,19436,23241,24445,24898,24959,25206,25207,26550,26710,26731,27226,27584,27588,27820,27920,28116,28305,29121,29256,29596,30193,30251,30896,30907,30999,31133,31638,31689,31851,32071,32112,32401,34649…	GPR35,NRIP1,PLA2G4A	GPR35,HEG1,HERC5,HERC6,IFI44,IFI44L,IFIT1,IFIT3,MX1,NRIP1,OASL,PLA2G4A,RSAD2,SLC12A8
MSigDB Perturbation	KRIGE_RESPONSE_TO_TOSEDOSTAT_24HR_UP	Genes up-regulated in HL-60 cells (acute promyelocytic leukemia, APL) after treatment with the aminopeptidase inhibitor tosedostat (CHR-2797) [PubChem=15547703] for 24 h.	232	0.00167279	1	0.0242554	1.1948	213.425	255	6513	0.111451	0.0391525	154	701	702	15,16,30,37,58,60,63,66,73,87,89,94,96,99,113,128,132,145,151,152,171,174,180,199,207,210,212,222,228,236,252,263,267,271,290,300,302,309,328,332,335,339,343,347,355,364,369,375,376,382,397,408,415,419,424,448,451,459,471,484,485,509,510,514,515,533,544,552,567,580,588,598,599,605,625,627,628,636,652,662,664,666,673,683,696,701,703,713,718,722,731,735,742,743,756,766,774,799,816,829,838,860,907,9…	15,16,30,37,58,60,63,66,73,87,89,94,96,99,113,128,132,145,151,152,171,174,180,199,207,210,212,222,228,236,252,263,267,271,290,300,302,309,328,332,335,339,343,347,355,364,369,375,376,382,397,408,415,419,424,448,451,459,471,484,485,509,510,514,515,533,544,552,567,580,588,598,599,605,625,627,628,636,638,652,662,664,666,673,683,688,696,701,703,713,718,722,727,731,735,742,743,745,756,766,774,799,816,8…
,57823,57838,57839,57840,57847,57848,57849,57850,57851,57852,57853,57854,57855,57856,57857,57974,57975,57990,57991,58005,58006,58007,58008,58009,58010,58029,58030,58031,58032,58033,58034,58035,58036,58043,58044,58163,58246,58247,58257,58286,58287,58315,58384,58385,58440,58475,58476,58477,58478,58479,58480,58481,58482,58588,58589,58590,58591,58620,58638,58639,58640,58641,58660,58661,58662,58663,58…	ABHD2,ACAA2,ACSL1,ADRB1,AGO4,AKAP13,ANTXR2,ARAP2,ARFGAP3,ARHGEF7,ARRDC3,ARRDC4,ATF3,B3GNT5,BAZ2B,BCL6,BNIP3L,BST1,BTG1,C10orf54,C11orf30,CBX5,CD40,CD55,CDC42BPA,CDK19,CDKN1A,CEBPB,CHAC1,CHD2,CUL4B,DDB2,DDIT4,DPYSL2,DUSP10,DUSP4,DUSP6,DZIP3,EEF1A1,EHBP1L1,EIF1,ENTPD4,ETV5,FAM134B,FLRT2,FRA10AC1,GADD45A,GNS,GPATCH2L,GPR84,HBEGF,HDAC9,HIP1,HIPK2,HMGCL,HTT,IDH1,IL18,IRF2BPL,ITM2B,ITPR1,ITPR2,JAK1,KIF…	AAK1,AARS,ABHD2,ACAA2,ACSL1,ADAL,ADORA3,ADRB1,AGA,AGFG1,AGO4,AGPAT9,AJUBA,AKAP13,AKNA,AKTIP,ALDH1L2,ALDH6A1,ALMS1,ALOX5,ALOX5AP,ANKRA2,ANTXR2,ANXA3,AP1G2,AP1S2,APH1B,APOLD1,APOOL,ARAP2,ARFGAP3,ARHGAP25,ARHGAP30,ARHGAP9,ARHGEF40,ARHGEF7,ARHGEF9,ARID4A,ARMCX3,ARRDC3,ARRDC4,ASNS,ASPHD2,ASS1,ATAD2B,ATF3,ATF5,ATG2A,ATXN1,AZI2,B3GALTL,B3GNT5,B4GALT4,BATF3,BAZ2A,BAZ2B,BBS7,BCL2A1,BCL3,BCL6,BIN2,BLVRB,BM…
MSigDB Perturbation	MA_PITUITARY_FETAL_VS_ADULT_UP	Up-regulated in human fetal pituitary tissue, compared to adult pituitary tissue	233	0.0016743	1	0.0241732	1.91687	13.0421	25	398	0.0109266	0.0628141	10	28	29	1.31185e+87	131,185,217,270,394,414,630,736,793,871,891,907,911,1287,1322,1374,1401,1560,1820,1846,2023,2267,2469,2532,2579,2636,2654,2708,2802,2854,2855,2861,2879,3136,3613,3875,3989,4187,4192,4522,4975,4987,5713,5928,6136,6445,6582,6805,7623,7650,7652,7844,8192,8384,8563,8579,8580,8618,8844,8895,8951,9525,10293,10319,10494,10563,10568,10629,10809,10981,11363,11513,11566,11835,11889,12332,12399,12640,12644,…	CCNG1,CTGF,CTNNB1,FGF2,PIK3CB,PIK3CD,PIK3R1,RGS10,SEPT7,ZBTB18	ADCYAP1,APOOL,CALCOCO1,CCNG1,CDC5L,CDK1,CTGF,CTNNB1,FGF2,FGFR1,FUBP1,G0S2,IGFBP1,ING2,PIK3CB,PIK3CD,PIK3R1,PRKCD,QKI,RGS10,RGS2,RPA1,SEPT7,TNR,TP53RK,UHRF2,VGF,ZBTB18
MSigDB Perturbation	IVANOVA_HEMATOPOIESIS_STEM_CELL_AND_PROGENITOR	Genes in the expression cluster 'HSC and Progenitors Shared': up-regulated in hematopoietic stem cells (HSC) and progenitors from adult bone marrow and fetal liver.	234	0.00167452	1	0.024073	1.22137	170.301	208	5197	0.0909091	0.0400231	124	627	648	2,3,5,9,13,22,24,60,68,73,82,84,85,107,109,115,125,134,135,136,157,191,199,202,211,220,233,234,248,273,275,277,287,289,312,320,325,326,337,351,356,368,373,385,391,396,407,424,459,463,465,483,485,525,530,534,537,550,553,563,567,572,589,590,616,632,645,654,668,673,682,708,729,733,742,780,781,783,798,806,811,836,888,912,917,928,943,953,961,972,982,985,986,987,1003,1007,1057,1066,1067,1070,1073,1091,…	2,3,5,9,13,22,24,60,68,73,82,84,85,107,109,115,125,134,135,136,157,191,199,202,211,220,233,234,248,273,275,277,287,289,312,320,325,326,337,351,356,368,373,385,391,396,407,424,459,463,465,483,485,525,530,534,537,550,553,563,567,572,589,590,601,616,632,645,654,668,673,682,690,708,710,729,733,742,760,780,781,783,798,806,811,836,868,888,912,917,925,928,943,953,961,972,982,985,986,987,1003,1007,1057,1…	ACAD9,ACTR3B,AGO1,ARHGAP32,ARHGEF2,BAZ1B,BCL2,BMP2,C10orf76,C3orf80,CA13,CCND2,CD93,CECR5,CHCHD6,CIAO1,CLEC14A,COL4A2,CORO2A,CRTC1,CRYGA,CTBP2,DCLK1,DUSP7,EDIL3,ENSG00000173517,EXOC3L2,FGFR1OP2,FLNB,FNBP1L,FUT8,GALNT11,GBP4,GIMAP6,GINS1,GJA1,GPR12,HIC1,HIC2,HOXA4,HP1BP3,INSR,IRF2BPL,ITGA6,ITGB8,ITPR1,KCTD1,KHDRBS3,KIAA1279,KIAA1549,KLF12,KLF17,KLF4,LDHD,LHPP,LIMD2,MAMDC2,MAPK6,MIER2,MLXIPL,MPPED2…	ABCB11,ABCC1,ABCF2,ABHD8,ABI2,ABL1,ACAD8,ACAD9,ACADL,ACE,ACOT2,ACP6,ACSF3,ACSL3,ACSM1,ACTR3B,ADA,ADCK1,ADRB3,AFAP1L1,AGAP2,AGO1,AGR2,AKAP6,ALDH5A1,ALG11,ALKBH6,AMER1,AMIGO2,ANGPT1,ANKRD37,ANKZF1,ANXA10,AP5Z1,APOA1BP,APOA5,ARHGAP32,ARHGAP35,ARHGEF17,ARHGEF2,ARL3,ARL5B,ARMC10,ARPP19,ART1,ASAH2,ASCL1,ASRGL1,ASXL2,ATF6B,ATHL1,ATXN3,AVEN,AVPI1,BAZ1B,BCAR1,BCL2,BCL2L14,BFAR,BMP2,BMS1,BOD1,BPHL,BRF2,BRI…
MSigDB Perturbation	KYNG_ENVIRONMENTAL_STRESS_RESPONSE_DN	All common down-regulated stress response genes (Human Environmental Stress Response, H-ESR).	235	0.00168367	1	0.0241016	2.39659	6.25889	15	191	0.00655594	0.078534	4	19	20	1.31185e+49	131,185,217,244,369,408,414,711,736,871,1252,1374,1401,1474,1832,2056,2420,2428,2469,2598,2904,2944,3028,3136,3137,3188,3644,3750,3762,3917,4227,4317,4976,5602,5803,5867,6058,6285,6466,6582,6687,7849,8818,9004,9293,10102,10786,11076,12052,12292,13364,13428,13582,13665,14831,15159,15598,15674,15981,16125,16269,16734,17456,17540,17647,18058,18551,18552,19653,20320,22153,22444,22736,22966,23561,2368…	HNRNPC,SLC30A5,SOX9,SYK	CEPT1,COL17A1,CTNND1,FUT4,GABBR1,GNPNAT1,HNRNPC,HSD17B10,NCOR1,SGPL1,SLC18A2,SLC30A5,SOCS4,SOX7,SOX9,SPIDR,SYK,USP1,ZNF507
MSigDB Perturbation	GINESTIER_BREAST_CANCER_20Q13_AMPLIFICATION_UP	Genes up-regulated in metastatic breast cancer tumors having type 2 amplification in the 20q13 region; involves MYBL2, STK6 and ZNF217 [GeneID=4605;6790;7764]	236	0.00170064	1	0.0242412	1.60422	27.4277	44	837	0.0192308	0.0525687	27	111	114	37,58,60,169,171,222,255,257,258,299,333,451,467,469,580,599,608,646,766,796,1022,1030,1039,1043,1077,1120,1131,1143,1154,1514,1544,1552,1842,1852,1885,2020,2167,2270,2284,2458,2477,2635,2648,2688	37,58,60,169,171,222,255,257,258,299,333,418,451,467,469,580,599,608,646,766,796,1022,1030,1039,1043,1077,1098,1120,1131,1143,1154,1514,1544,1552,1776,1834,1842,1852,1885,2020,2022,2093,2167,2270,2284,2458,2477,2635,2648,2658,2688,2770,2799,2841,2915,2998,3048,3050,3110,3195,3271,3387,3593,3612,3624,3633,3734,3804,3872,3876,3877,4004,4058,4156,4235,4321,4375,4859,5009,5143,5146,5202,5418,5423,555…	ADNP,AKAP12,ARFGEF2,ATP2B4,ATP5SL,BCAS4,BNIP3L,CDS1,DAAM1,ESR1,F2R,H3F3A,ITPRIPL2,KIF5B,KLHL8,LIN52,NCOA3,PFDN1,POSTN,RAD23B,RBM39,RHOBTB3,SLC4A7,STAG2,TK2,ZNF552,ZNF587	ADCY1,ADD1,ADNP,AKAP12,AP1AR,ARFGEF2,ARNT,ATP2B4,ATP5E,ATP5S,ATP5SL,AZI2,BAIAP3,BCAS4,BLOC1S6,BLVRB,BNIP3L,C1orf27,C20orf141,CACNG4,CDS1,CFD,CTNNBL1,CTTN,DAAM1,DIXDC1,DLG5,DNAJB14,DNAJC21,DPM1,DUSP16,EBP,EFCAB11,ELP2,EMILIN3,ENPP1,ERGIC3,ESR1,F2R,FITM2,FNIP1,GINM1,GRID1,H3F3A,H3F3B,HSP90AA1,HSPB1,ITPRIPL2,KCTD20,KIAA1244,KIF5B,KLF9,KLHL8,LEPROT,LIN52,MAGT1,MAPT,MLLT10,MORF4L2,MTG2,NCOA3,PARD6B,PD…
MSigDB Perturbation	BENPORATH_SOX2_TARGETS	Set 'Sox2 targets': genes upregulated and identified by ChIP on chip as SOX2 [GeneID=6657] transcription factor targets in human embryonic stem cells.	237	0.00173092	1	0.0245688	1.20816	188.717	228	5759	0.0996503	0.0395902	134	709	725	8,15,22,24,30,58,66,105,113,116,122,128,129,132,145,151,156,164,169,174,176,210,255,275,277,305,325,332,336,338,348,360,361,367,369,371,376,386,399,408,417,419,441,444,454,464,468,482,484,498,507,510,538,545,552,563,570,581,590,592,613,619,623,630,633,648,649,663,689,695,701,711,721,749,750,751,755,769,781,793,798,813,820,827,846,851,855,902,933,951,965,1003,1007,1025,1047,1049,1052,1084,1089,109…	8,15,22,24,30,58,66,105,113,116,122,128,129,132,145,151,156,164,169,174,176,210,255,275,277,305,325,332,336,338,348,360,361,367,369,371,376,386,399,408,417,419,441,444,454,464,468,482,484,498,507,510,538,545,552,563,570,581,590,592,613,619,623,630,633,648,649,663,689,695,701,711,721,749,750,751,755,769,781,793,798,813,814,820,827,846,851,855,862,902,933,951,964,965,1003,1007,1025,1047,1049,1052,1…
,68422,68436,68439,68450,68457,68480,68484,68493,68522,68541,68542,68567,68575,68624,68637,68694,68717,68732,68741,68743,68750,68756,68785,68794,68799,68804,68812,68843,68846,68857,68860,68881,68884,68887,68925,68926,68934,68935,68939,68940,68941,68945,68946,68957,68963,68964,68980,68985,68991,68998,69007,69008,69026,69029,69044,69045,69047,69048,69049,69062,69076,69090,69099,69111,69112,69113,69…	ADAR,ADD3,AGO2,AK3,ALCAM,ANKRD1,AP3B1,ARF4,ARL4D,ARRDC3,ATF3,AUH,BCAT1,BMP2,BTG1,BUB3,C1orf174,CABLES1,CACNA1A,CALM1,CAPRIN1,CARKD,CBX5,CDC42BPA,CDK14,CEP95,CETN3,CISD1,COMMD7,CSNK1E,CTGF,DHRS3,DIAPH3,DKK1,DPYSL2,DTNA,DUSP6,ELAVL2,EOMES,EXOSC5,EXPH5,FAM76B,FAM96A,FBXO11,FGF2,FGFR2,FOXO1,FXYD5,FZD1,FZD2,FZD7,GADD45G,GDAP1,GJA1,GNPTAB,GRHL2,GXYLT1,H3F3A,HDAC9,HELLS,HIF1AN,HIST3H2A,HMG20A,HNRNPC,ICM…	AAMDC,AASDH,ABCB7,ABCF2,ABHD11,ABLIM1,ABTB2,ACIN1,ACO2,ACOT8,ACOX1,ACTR1A,ADAR,ADD3,ADRBK2,AGO2,AJUBA,AK3,AKIRIN1,AKIRIN2,AKT1S1,ALCAM,ALDH7A1,ALPL,AMOTL1,ANKHD1,ANKRD1,ANO8,ANP32A,ANP32B,AP2A1,AP3B1,AP5M1,APEX1,APH1A,APP,AQP2,ARF3,ARF4,ARFGEF1,ARHGAP1,ARHGAP11A,ARID1B,ARID4B,ARID5B,ARIH1,ARL4D,ARRDC3,ASNA1,ATAD2,ATF3,ATF4,ATP5F1,ATP6V1G1,AUH,AVEN,AZI1,B3GALT4,B4GALT6,BAMBI,BCAT1,BCKDHA,BCL9,BCLA…
MSigDB Perturbation	BOYAULT_LIVER_CANCER_SUBCLASS_G56_DN	Down-regulated genes in hepatocellular carcinoma (HCC) subclass G56, defined by unsupervised clustering.	238	0.00174035	1	0.0245988	2.24581	7.56965	17	231	0.00743007	0.0735931	9	17	17	4.61486e+61	461,485,630,742,793,978,1039,1263,1316,1339,1450,2010,2100,2122,2175,2561,2752,2869,3400,3462,3532,3613,3725,3843,3989,3990,4133,4846,5132,5224,5280,5801,6129,6288,6602,6641,6655,6805,6817,7030,7485,7910,8002,8072,8079,8149,8384,8515,8713,8895,8897,8923,9179,10310,10345,11429,11585,11990,12640,12694,13754,14061,14958,15136,15813,15817,15818,15825,16139,16916,17062,17310,17373,17473,17565,17762,17…	BHLHE40,CTGF,F2RL1,IER3,MAFF,NCALD,PLD1,THBS2,TRIB1	AGPAT2,BHLHE40,CTGF,F2RL1,HPS5,IER3,IL4R,LGALS3BP,MAFF,NAV2,NCALD,PLD1,QSOX1,RAB27A,THBS2,TRIB1,VNN3
MSigDB Perturbation	ENK_UV_RESPONSE_KERATINOCYTE_UP	Genes up-regulated in NHEK cells (normal epidermal keratinocytes) after UVB irradiation.	239	0.00174995	1	0.0246311	1.28998	103.878	134	3170	0.0585664	0.0422713	88	501	546	15,21,44,49,113,128,136,145,155,171,174,181,205,210,223,230,288,307,320,332,347,356,410,419,432,434,461,472,473,476,485,510,535,538,552,599,605,620,625,630,643,650,662,672,673,733,742,778,793,798,805,847,867,959,977,978,986,1003,1007,1019,1029,1039,1099,1106,1159,1190,1205,1207,1210,1213,1221,1272,1314,1327,1330,1339,1382,1407,1433,1450,1461,1467,1494,1500,1514,1530,1576,1616,1714,1738,1900,1924,…	15,21,44,49,113,128,136,145,155,171,174,181,205,210,223,230,288,307,320,332,347,356,410,419,432,434,461,472,473,476,485,510,535,538,552,599,605,620,625,630,637,643,650,662,672,673,710,724,733,742,778,793,798,805,815,847,867,959,977,978,986,1003,1007,1019,1029,1039,1099,1106,1159,1190,1205,1207,1210,1213,1221,1235,1272,1314,1327,1330,1339,1382,1407,1433,1450,1461,1467,1494,1500,1514,1530,1576,1616…	ACADVL,ADM,ALAS1,ATF3,ATG12,ATP6V0C,BTG1,CACNA1E,CDKN1A,CEBPB,CEBPG,CHRNB1,CITED2,CRHR1,CSRP1,CTGF,CTSD,CYP19A1,DHRS2,DKK1,DNAJA1,DPM2,DRAP1,DTNB,EIF1,EIF1B,EIF4EBP2,ENO1,EPHB3,EVX1,EYA2,F2RL1,FOXC1,GADD45A,GALNT3,GAST,GNAS,HBEGF,HMGA1,IER2,IER3,IL1B,ITGB7,ITM2B,ITPR1,KLF5,LGMN,LIG1,LY6E,LY6H,LYPD3,MAD1L1,MAFF,MGMT,MRPL23,MYCN,ODC1,PEPD,PKP3,PLD1,PPIF,PPP2R2A,PRL,PRPF19,PTGS1,PTH1R,RAB9A,RER1,RGS…	ABL1,ACAA1,ACADVL,ACO2,ACOX1,ACOX2,ACTN4,ADM,ADRA1D,AKR1B1,ALAS1,ALDH3B2,ALDOA,ALOX12,AMD1,ANXA2,AP2S1,API5,APOE,APRT,AQP6,AREG,AREGB,ASL,ASNS,ATF3,ATF4,ATG12,ATP5A1,ATP5D,ATP6V0A1,ATP6V0B,ATP6V0C,ATP6V0E1,ATP6V1E1,ATP6V1F,B2M,BAMBI,BANF1,BCKDK,BLCAP,BLVRB,BPGM,BRD2,BRS3,BSG,BTF3,BTG1,BTG3,BTRC,BUD31,C1R,CACNA1E,CAP1,CAPG,CASP1,CCK,CCL7,CCNA1,CCNC,CCNI,CCNT2,CD4,CD99,CDA,CDH16,CDK16,CDK5,CDKN1A,C…
MSigDB Perturbation	NIELSEN_SYNOVIAL_SARCOMA_DN	Top 20 negative significant genes associated with synovial sarcoma tumors.	240	0.0017712	1	0.0248263	2.84477	3.86675	11	118	0.00480769	0.0932203	3	20	20	6,17,42,265,447,715,744,889,1134,1262,1500	6,17,42,265,447,715,744,889,1134,1262,1500,3152,3352,5043,6709,7320,7488,7950,7976,8330,8455,8487,8893,9250,9376,9556,10113,10716,10970,10979,10995,11379,12867,12908,13822,15478,15722,15854,16296,16379,17707,18057,18602,19852,20344,20765,20883,21407,21549,21790,22694,25300,26081,26196,26762,29110,29240,31899,32289,32312,32651,32860,33392,33604,33818,33918,34054,34319,34815,35761,36580,37404,38356…	IFI35,MYOF,RARRES3	AIF1,ARHGDIB,C7,CASP1,CD4,CTSS,CYBB,HLA-DMA,IFI35,IL16,ITGB2,LGALS9,MYOF,NUPR1,PARP14,RARRES3,RNASE6,SQRDL,TRIM38,UCP2
MSigDB Perturbation	MISSIAGLIA_REGULATED_BY_METHYLATION_UP	Genes up-regulated in PaCa44 and CFPAC1 cells (pancreatic cancer) after treatment with decitabine [PubChem=451668], a DNA hypomethylating agent similar to azacitidine [PubChem=9444].	241	0.00181845	1	0.0253829	1.61831	25.9531	42	792	0.0183566	0.0530303	29	116	126	33,44,230,263,278,452,535,560,569,623,628,662,672,701,709,728,804,829,916,1207,1217,1241,1314,1392,1482,1485,1530,1700,1734,1812,1826,1986,1988,2032,2081,2182,2235,2430,2551,2684,2716,2763	33,44,230,263,278,452,535,560,569,623,628,637,662,672,701,706,709,728,804,829,916,1207,1217,1241,1314,1392,1482,1485,1530,1700,1718,1734,1812,1826,1986,1988,2032,2081,2178,2182,2235,2310,2330,2430,2551,2638,2684,2713,2716,2763,2779,2819,2843,2898,3099,3111,3309,3321,3352,3453,3509,3638,3655,3773,3928,3944,4077,4159,4293,4325,4495,4562,4745,4825,4922,4962,4981,4988,5068,5131,5192,5211,5233,5251,52…	ARF4,ATF3,ATOX1,CCL20,CD55,CDKN1A,CTSB,DUSP6,GADD45A,GRK4,IGF2,IL1B,KDM2A,KIAA0247,LGMN,LY6E,MFGE8,MYRIP,PSAP,PSEN1,RAB9A,RARRES1,RCAN1,SERPINE1,SP110,ST3GAL5,TMEM184B,TNFAIP3,UBE2L6	ACSS1,AREG,AREGB,ARF4,ARL6IP5,ATF3,ATOX1,ATP1B1,ATP6V0E1,ATP6V1G1,BCL11A,BECN1,BIRC3,BLZF1,BST2,CAMSAP2,CCL20,CD55,CD9,CDC123,CDKN1A,COL1A1,CTAG1A,CTAG1B,CTSB,CTSL,DNAJB2,DUSP1,DUSP5,DUSP6,EVX2,GADD45A,GRK4,GRN,GSN,HIST2H2AB,HLA-E,IFI44L,IFIT1,IFNGR1,IGF2,IGFBP3,IL1B,IL23A,IL32,ISG15,ISG20,ITGA2,KDM2A,KIAA0247,LCN2,LGALS9,LGMN,LY6E,MAP1LC3B,MAP2K3,MFGE8,MFI2,MMP15,MX2,MXD4,MYRIP,NEU1,OAS1,OAS2,P4…
MSigDB Perturbation	YAMASHITA_LIVER_CANCER_STEM_CELL_UP	Genes up-regulated in hepatocellular carcinoma (HCC) cells with hepatic stem cell properties.	242	0.0018219	1	0.0253259	1.78808	16.7778	30	512	0.0131119	0.0585938	16	45	47	8.71642e+102	87,164,193,228,229,244,358,603,604,621,662,683,685,764,807,821,962,1015,1131,1190,1196,1203,1216,1252,1272,1339,1356,1474,1513,1518,1530,1772,1776,1814,1948,2423,2488,2500,2527,2551,2799,2817,2946,3228,3648,3724,3810,3908,3948,3967,4042,4156,4293,4325,4337,4348,4664,5132,5291,5353,5397,5487,5544,5610,5724,5782,5801,5802,5890,5967,5985,6298,6299,6315,6321,6322,6526,6555,6671,6700,6843,6947,7101,71…	ASAP1,CSNK1E,DDR1,DKK1,ELF3,ESR1,GADD45A,IGF1,ITGB5,LINGO1,MAP3K5,MERTK,ROBO2,SEMA3C,SEMA4G,SOX9	ARHGEF15,ARPC5L,ASAP1,BACE2,BAK1,CCNB2,CDKN2A,CLDN1,CLDN4,CSNK1E,CYCS,DDR1,DKK1,DUSP1,ELF3,ESR1,FGFR3,FZD5,GADD45A,GRB7,GYS2,HNF4A,IGF1,ITGB5,LINGO1,MAP2K2,MAP3K5,MAPK13,MERTK,MMP11,MYLK,PDGFRB,PIK3C2G,PIK3C3,PLCB1,PRKCD,RARG,ROBO2,SEMA3C,SEMA4G,SMAD5,SOX9,TCF7L2,WEE1,YWHAZ
MSigDB Perturbation	PEDERSEN_METASTASIS_BY_ERBB2_ISOFORM_1	Genes regulated in MCF7 cells (breast cancer) by expression of full-length and truncated (611-CTF) forms of ERBB2 [GeneID=2064] at both 15 h and 60 h time points.	243	0.00184302	1	0.0255141	1.75006	18.2851	32	558	0.013986	0.0573477	15	47	47	3.91482e+109	39,148,171,228,403,461,485,493,544,592,599,630,701,718,742,793,978,1087,1094,1219,1263,1325,1389,1450,1520,1646,1649,1797,1802,2100,2106,2122,2151,2175,2684,2713,2792,2869,2898,3097,3304,3400,3422,3532,3613,3715,3725,3825,3843,3979,3989,4051,4077,4190,4274,4441,4607,4715,4846,4931,4946,5192,5224,5320,5327,5495,5623,5813,5889,5979,6129,6195,6288,6513,6602,6805,6824,7000,7030,7130,7257,7355,7408,74…	BHLHE40,CTGF,DUSP4,DUSP6,ELK3,GPR126,HBEGF,MAFF,MAP1B,MAP3K5,PHLDA1,PLEK2,SPRY4,TNFRSF21,TRIB1	AREG,AREGB,BCMO1,BHLHE40,CAPN8,CTGF,DUSP4,DUSP5,DUSP6,EGR1,EGR3,ELK3,EPHA2,EREG,ERRFI1,FOSL1,GAL,GEM,GOLT1A,GPR126,HBEGF,ITGA2,KIAA1199,KRT81,LIF,LPAR6,MAFF,MALL,MAP1B,MAP3K5,MPZL2,MXD1,NAV2,PHLDA1,PLEK2,PLK3,RASD1,RASGEF1A,REEP1,RUNX2,SHC4,SLC7A11,SPRY4,STAMBPL1,STRN3,TNFRSF21,TRIB1
MSigDB Perturbation	AMIT_EGF_RESPONSE_120_MCF10A	Genes whose expression peaked at 120 min after stimulation of MCF10A cells with EGF [GeneID=1950].	244	0.00186218	1	0.0256737	2.03444	10.3223	21	315	0.00917832	0.0666667	13	43	43	1.19171e+73	119,171,485,544,599,615,701,718,825,826,912,1207,1213,1217,1274,1392,1641,1649,1802,2570,2612,2684,2713,2869,3076,3149,3358,3641,3942,3957,4051,4077,4190,4239,4285,4534,4537,4596,4607,4638,4715,4808,4816,5247,5305,5327,5571,5674,5889,5988,6101,6168,6288,6336,6380,6602,6622,6824,7414,7512,7769,7861,7917,8000,8417,8430,8881,9692,9710,9790,9808,9820,9849,9951,10151,10210,10956,10985,11133,11273,1140…	CCL20,DUSP6,EIF1,GDF15,HBEGF,IL1A,IL1B,MAFF,PDLIM5,PHLDA1,PPP2R4,RPS6KA4,SPRY4	ALDH1A3,AP1S1,APOO,BAX,BCL10,CCL20,CDV3,DUSP6,DYNC1LI1,EIF1,ENC1,EPHA2,EPOR,EREG,FOSL1,GDF15,GPR161,HBEGF,IL1A,IL1B,ING2,KCNJ5,LIF,LSM4,MAFF,MRGBP,NSUN3,PCBD1,PDLIM5,PHLDA1,PHLDA3,PLAUR,PPP2R4,PRDX2,RPS6KA4,SDHAF1,SERPINB2,SH2D3A,SPRY4,TESK1,TRIM21,TXNRD1,YRDC
MSigDB Perturbation	TSAI_RESPONSE_TO_IONIZING_RADIATION	Genes up-regulated in TK6, WTK1, and NH32 cell lines (lymphoblast) in response to ionizing radiation.	245	0.0018841	1	0.0258698	1.44803	46.2699	67	1412	0.0292832	0.0474504	37	145	149	37,60,74,84,96,115,123,171,222,228,318,324,371,404,410,462,481,510,599,615,673,701,721,766,817,836,912,961,1022,1035,1077,1132,1143,1217,1271,1382,1392,1501,1507,1511,1558,1667,1668,1767,1820,1822,1831,1846,1869,1935,2032,2047,2065,2079,2165,2198,2257,2309,2409,2477,2502,2521,2645,2670,2684,2716,2753	37,60,74,84,96,115,123,171,222,228,318,324,371,404,410,462,481,510,599,615,673,701,721,766,817,826,836,862,912,961,1022,1035,1077,1115,1132,1143,1217,1271,1382,1392,1501,1507,1511,1558,1667,1668,1767,1820,1822,1831,1841,1846,1869,1935,2013,2023,2029,2032,2047,2056,2065,2079,2165,2178,2183,2198,2257,2309,2330,2409,2468,2477,2495,2502,2521,2638,2645,2670,2684,2713,2716,2747,2753,2772,2855,2879,2900…	AHR,BAI3,BTG1,CCL20,CCNG1,CCR1,CD80,CD83,CDKN1A,COL4A2,DDB2,DLX2,DUSP6,ENO1,EP300,GDF15,HBEGF,IRF4,KLF4,MAP7,MAX,MDFI,MED21,MYC,NCOA3,PLCG2,RELA,RORA,RPS6KA1,SIPA1,SMAD3,TANK,TFDP2,TGIF1,TLE3,TNFAIP3,TP53I3	ADORA3,AHR,AKAP5,ARL2BP,ATF5,AXL,BAI3,BATF,BBC3,BIRC3,BTG1,BTG2,CARTPT,CASP1,CCL18,CCL20,CCL21,CCL3,CCL4,CCNE2,CCNF,CCNG1,CCNG2,CCNI,CCNK,CCR1,CCT4,CCT7,CD164,CD59,CD79A,CD80,CD83,CDK1,CDK6,CDKN1A,CDKN1C,CFLAR,CGRRF1,CLK1,COL4A2,COL6A1,COX7B,CRAT,CXCL10,DDB2,DDIT3,DKC1,DLX2,DPYSL3,DUSP6,ENC1,ENO1,ENSG00000259529,EP300,FAM134C,FAS,FGFR1,FN1,GDF15,GRN,HBEGF,IFNGR1,IL2RB,IRF4,IRF9,ITGA2,JAK2,JUNB,KI…
MSigDB Perturbation	MOHANKUMAR_TLX1_TARGETS_UP	Up-regulated in MCF7 cells (breast cancer) by TLX1 (HOX11) [GeneID=3195].	246	0.00191362	1	0.0261684	1.28673	104.14	134	3178	0.0585664	0.0421649	79	409	423	25,37,54,55,61,64,69,98,153,155,201,222,235,263,273,275,277,278,281,312,394,420,434,436,464,520,529,539,550,560,567,570,572,578,588,605,641,648,656,696,709,716,742,766,767,812,857,860,880,959,985,1011,1022,1032,1035,1077,1108,1159,1169,1179,1202,1263,1276,1306,1327,1334,1339,1344,1376,1379,1411,1421,1433,1452,1467,1507,1525,1575,1593,1598,1605,1611,1631,1666,1669,1721,1726,1729,1766,1778,1811,183…	25,37,54,55,61,64,69,98,153,155,201,222,235,263,273,275,277,278,281,312,394,420,434,436,464,520,529,539,550,560,567,570,572,578,588,605,641,648,656,696,709,716,742,766,767,812,857,860,880,959,985,1011,1022,1032,1035,1077,1108,1159,1168,1169,1179,1202,1235,1263,1276,1304,1306,1313,1327,1334,1339,1344,1376,1379,1411,1421,1433,1437,1452,1463,1467,1507,1525,1532,1575,1593,1598,1605,1611,1631,1661,166…	ACADVL,ADAMTS9,ADAR,ADNP,AGPAT6,ANP32E,ASUN,ATP1B3,ATXN10,BCL2,BCL2L11,BHLHE40,CALM1,CERS6,CHN1,CMTM6,COPB2,CTSB,CTSD,DDX6,DHRS2,EEF1A1,ELOVL5,EPAS1,FRMD4A,FUT8,GDAP1,GNAS,GSE1,GTF2I,H1F0,HELLS,HIBADH,HNRNPLL,HNRNPM,ICMT,IER3,ILF3,ITPK1,KCNK2,KCTD3,MARCKSL1,MED13L,MKL2,MTF2,NDC1,NTRK3,NUP210,NXPH3,PALLD,PBX1,PGD,PICALM,PIGK,PLEKHO1,PNPLA3,PPAP2B,PPT1,PRLR,RBM47,RGS16,RHOQ,RPRD2,SEPT7,SGCG,SKI,SLC…	ABCD3,ABTB2,ACADVL,ACKR3,ACTL6A,ADAMTS9,ADAR,ADCY5,ADIPOR1,ADNP,AGPAT6,ALDH3A2,ALG8,ALKBH5,AMD1,ANAPC5,ANGPTL1,ANP32E,AP1M2,AR,ARCN1,ARF3,ARPC1B,ARRB1,ASB13,ASF1B,ASUN,ATP1B3,ATP2B1,ATP6AP1,ATXN10,ATXN1L,BAMBI,BCAT2,BCKDK,BCL2,BCL2L11,BHLHE40,BUB1,BZW2,C11orf82,C12orf52,C6orf106,CA12,CACNA2D4,CALM1,CALM2,CALM3,CALR,CAMK2B,CAPN1,CAPN15,CARM1,CASP2,CAT,CCDC47,CCNB2,CCT6A,CCT8,CD36,CDC20,CDC25A,CDC4…
MSigDB Perturbation	TONKS_TARGETS_OF_RUNX1_RUNX1T1_FUSION_HSC_UP	Genes up-regulated in normal hematopoietic progenitors by RUNX1-RUNX1T1 [GeneID=861;862] fusion.	247	0.00191559	1	0.0260892	1.37434	64.0307	88	1954	0.0384615	0.0450358	46	179	182	18,36,57,63,76,119,136,142,183,236,248,253,273,302,312,325,328,339,350,367,386,401,417,426,462,482,544,550,562,581,597,598,615,654,656,701,718,733,749,808,825,912,972,985,1008,1039,1061,1075,1136,1162,1180,1242,1251,1271,1274,1306,1339,1351,1411,1431,1514,1546,1563,1592,1593,1606,1626,1633,1637,1638,1671,1729,1775,1802,1897,1898,1928,2030,2098,2139,2266,2342,2382,2520,2574,2684,2730,2744	18,36,57,63,76,119,136,142,183,236,248,253,254,273,302,312,325,328,339,350,367,386,401,417,426,462,482,544,550,562,581,597,598,615,654,656,701,718,733,749,808,825,826,912,960,972,985,1008,1039,1061,1075,1117,1136,1162,1180,1203,1242,1251,1271,1274,1306,1339,1351,1411,1431,1449,1514,1546,1563,1592,1593,1606,1626,1632,1633,1637,1638,1671,1729,1775,1802,1897,1898,1928,2004,2030,2098,2139,2212,2266,2…	ADD3,AGTR1,AHR,ANK3,BNIP3L,CALCRL,CDC42EP3,CEACAM1,DDR1,DRAM1,DUSP6,EVI2A,F2RL1,FAR2,FNBP1L,FZD7,GDF15,GLMN,H1F0,HOXA5,KLF6,MARK4,MXI1,NEDD9,NTRK3,PALLD,PDE4B,PDLIM5,PHLDA1,PRKAR1A,RBPMS,RNF17,RPS6KA5,RUNX1,S1PR1,SAMSN1,SEPT10,SLC2A3,SLC39A9,SOCS2,SOX4,STX6,TGFBR2,TNFSF4,TRIB2,UBL3	ABI2,ACTA2,ADD3,AGTR1,AHR,ALDH1A1,ALDH1A2,AMIGO2,ANK3,ANXA2,APOE,ARG2,ARHGEF12,ARID5B,BAMBI,BBIP1,BNIP3L,CA2,CALCRL,CCNG2,CD200,CD226,CD69,CDC42EP3,CEACAM1,CH25H,CLEC2B,COCH,COL3A1,CREM,CRHBP,CYP1A1,DAB2,DDAH2,DDR1,DDX58,DEPTOR,DGKE,DNAJB5,DRAM1,DUSP6,E2F5,ECM1,EGR2,EMP1,ENC1,ENSG00000259529,EPS8,ERG,EVI2A,F2RL1,FAM65B,FAR2,FBXW11,FNBP1L,FSTL1,FXR1,FZD7,GBP2,GDF15,GDF3,GLMN,GPR32,GSN,GSTM4,GUCY1A…
MSigDB Perturbation	WIERENGA_STAT5A_TARGETS_UP	Genes up-regulated in CD34+ [GeneID=947] cells by intermediate activity levels of STAT5A [GeneID=6776]; predominant long-term growth and self-renewal phenotype.	248	0.00195868	1	0.0265686	1.3653	66.6522	91	2034	0.0397727	0.0447394	44	207	210	15,16,18,21,68,113,128,145,174,207,210,253,276,290,307,328,332,367,415,419,426,461,473,509,510,544,569,594,613,650,714,718,735,742,756,778,796,838,903,939,978,1039,1106,1136,1165,1172,1180,1212,1221,1263,1270,1329,1370,1382,1394,1397,1404,1447,1450,1548,1565,1574,1576,1592,1596,1660,1668,1744,1802,1868,1921,1939,1988,2079,2098,2100,2122,2175,2189,2257,2266,2359,2413,2467,2486,2535,2565,2670,2674,…	15,16,18,21,68,113,128,145,174,207,210,253,276,290,307,328,332,367,415,419,426,461,473,509,510,544,569,594,613,650,710,714,718,735,742,756,778,796,826,838,903,925,939,978,1039,1063,1096,1106,1136,1165,1172,1180,1212,1221,1263,1270,1329,1370,1382,1394,1397,1404,1447,1450,1548,1565,1574,1576,1592,1596,1660,1668,1670,1744,1802,1834,1868,1921,1939,1988,2079,2098,2100,2122,2162,2175,2189,2257,2266,233…	A4GALT,ADM,AK3,ANTXR2,ARL4A,BBX,BHLHE40,BTG1,CCL5,CCND2,CD40LG,CD83,CLEC4A,CTNS,CTSZ,CYSTM1,DDIT4,DHRS3,DPYSL4,F2RL1,FCER2,GALC,GBP4,GNG2,GNPTAB,IL4I1,KLF6,MAOA,MOB3B,MYO10,NAAA,PHLDA1,PIM1,PSAT1,SAMSN1,SLC2A14,SLC2A3,SLC6A9,SOCS2,ST3GAL5,TGM2,TLE3,TMEM116,TRIB1	A4GALT,ABCA1,ADM,AGPAT9,AK3,AK4,AMACR,ANTXR2,ARG2,ARID5B,ARL4A,BATF3,BBX,BHLHE40,BTG1,BTG2,C3orf58,C4orf32,CA2,CBS,CCL2,CCL22,CCL3,CCL4L1,CCL4L2,CCL5,CCND2,CCR7,CD1A,CD1B,CD40LG,CD83,CDHR1,CDKN1C,CERCAM,CFH,CH25H,CISH,CKAP4,CLEC4A,COCH,COL6A1,CPXM1,CSF2,CST7,CTNS,CTSH,CTSZ,CTXN1,CXCL10,CYSTM1,DAB2,DAPK1,DCPS,DDIT4,DDN,DHRS3,DPYSL4,DUSP5,EGFL6,EGR1,EMP1,ENC1,ENPP3,EPB41,F2RL1,FAM126B,FAM129B,FAM13…
MSigDB Perturbation	MARTIN_INTERACT_WITH_HDAC	Interaction partners of class IIa histone deacetylases (HDAC).	249	0.00204397	1	0.0276142	1.70652	19.9236	34	608	0.0148601	0.055921	12	43	44	18,30,196,253,351,663,703,780,820,958,969,1070,1103,1136,1164,1495,1529,1556,1573,1592,1641,1770,1790,1927,2091,2169,2259,2278,2283,2316,2325,2429,2705,2735	18,30,196,253,286,351,430,663,703,710,780,820,958,969,1070,1103,1136,1164,1495,1529,1556,1573,1592,1641,1670,1770,1790,1927,2091,2169,2259,2278,2283,2316,2325,2331,2369,2429,2567,2705,2735,2859,2891,3002,3149,3210,3289,3316,3344,3358,3438,3529,3591,3627,3641,3753,3881,4036,4091,4294,4487,4534,4754,4808,4974,5101,5199,5331,5354,5424,5523,5538,5571,5604,5923,5942,6009,6074,6101,6218,6236,6573,6630,…	ACTN1,BCL6,BCOR,CAMK2D,CBX5,DNAJB6,EDNRA,HIF1A,NCOR2,NRIP1,PPP2R4,YWHAQ	ACTN1,ACTN4,ANKRA2,ATF4,BCL6,BCOR,CAMK1,CAMK2D,CAMTA2,CBX5,CTBP1,DNAJB6,EDNRA,ETV6,FOXP3,GATA1,GATA2,HIF1A,KAT5,KPNA2,MAPK1,MAPK3,MARK2,NCOR1,NCOR2,NFKBIA,NKX2-5,NR2C1,NRIP1,PHB2,PKD1,PPA1,PPP1R12A,PPP2R4,REST,RUNX2,RUNX3,SIN3A,SRF,TP53BP1,UBE2I,YWHAQ,ZBTB16
MSigDB Perturbation	FIRESTEIN_PROLIFERATION	Genes required for proliferation of DLD-1 cell (colon cancer with APC [GeneID=324] deletions), based on shRNA screen.	250	0.00206827	1	0.0278306	1.43807	47.2857	68	1443	0.0297203	0.0471241	41	168	171	26,61,87,112,131,139,151,162,185,191,217,252,303,324,340,414,444,454,455,461,470,487,582,613,627,659,683,685,714,736,869,871,954,975,978,1056,1065,1069,1178,1281,1309,1323,1374,1401,1450,1683,1734,1735,1890,1916,1976,1978,2130,2175,2194,2282,2443,2469,2494,2498,2539,2551,2561,2565,2568,2597,2612,2644	26,61,87,112,131,139,151,162,185,191,217,252,303,324,340,414,444,454,455,461,470,487,582,613,627,659,683,685,714,736,779,869,871,954,975,978,1056,1065,1069,1178,1281,1309,1323,1374,1401,1402,1450,1586,1683,1734,1735,1841,1890,1916,1976,1978,2054,2127,2130,2173,2175,2194,2197,2251,2282,2422,2433,2443,2469,2494,2498,2522,2539,2551,2561,2565,2568,2569,2597,2612,2644,2803,2806,2970,3008,3052,3136,319…	ADCK3,AK3,ARHGEF2,BCL2L11,C17orf75,CAMK4,CAMKV,CD40,CDK14,COL4A3BP,CSNK1E,ENSG00000173517,EP300,EPHA4,EPHA6,FIGN,GALK2,GRK4,HECW1,HIPK2,IKBKE,INPP5D,LIMK2,MERTK,NEK7,NUAK2,PIK3AP1,PIK3CG,PIK3R1,PKN1,PPARA,RAF1,RCSD1,ROR1,RPS6KA4,SPHKAP,STK32C,TGFA,TNIK,TRIB1,ZC3HC1	AAK1,ADCK3,ADK,AK3,AKAP4,AKAP6,AKAP7,AKT3,ALK,APPL1,ARHGEF2,ARHGEF25,ATR,AXL,BCL2L11,BMPR1A,BRAF,BTK,C17orf75,CAMK4,CAMKV,CCNB3,CD40,CDK14,CDK3,CDK6,CDK8,CDKL4,CDKL5,CHEK1,CKS1B,CMPK1,CNP,COL4A3BP,CPNE1,CSNK1E,CSNK2A2,CYLD,DBF4,DKC1,DLG2,DMPK,ENSG00000091436,ENSG00000134602,ENSG00000173517,ENSG00000268942,EP300,EPHA4,EPHA6,EPHB1,EPHB2,EPHB4,ERBB3,ETNK1,EXOSC10,FGFR3,FIGN,FOXO4,FYN,GALK2,GCKR,GMIP…
MSigDB Perturbation	FOSTER_TOLERANT_MACROPHAGE_DN	Class NT (non-tolerizeable) genes: induced during the first LPS stimulation and induced at equal or greater degree in tolerant macrophages.	251	0.00210308	1	0.0281863	1.23641	144.774	179	4418	0.0782343	0.0405161	121	402	405	11,18,23,33,36,72,81,107,119,122,140,148,169,171,201,205,214,219,221,226,246,252,253,279,284,289,349,360,367,378,381,395,400,403,423,426,467,471,475,476,493,520,525,528,540,556,594,599,605,620,624,627,629,646,658,687,699,734,751,781,786,810,825,835,838,850,931,947,958,1000,1033,1038,1039,1086,1136,1155,1156,1170,1172,1177,1182,1207,1219,1226,1241,1274,1275,1300,1303,1344,1370,1371,1372,1389,1406,…	11,18,23,33,36,72,81,107,119,122,140,148,169,171,201,205,214,219,221,226,246,252,253,279,284,289,349,360,367,378,379,381,395,400,403,423,426,467,471,475,476,493,519,520,525,528,540,556,594,599,605,620,624,627,629,646,658,665,687,699,734,751,762,781,786,810,814,825,835,838,850,931,932,947,958,1000,1033,1038,1039,1060,1086,1098,1107,1136,1155,1156,1170,1172,1177,1182,1207,1219,1226,1241,1274,1275,1…	AEBP2,AFF1,ALCAM,ARHGAP26,ARHGEF3,ARID5A,ARL4A,ATP10A,ATP11B,ATP9B,B4GALT5,BATF2,CAMK2D,CASP7,CAV1,CCND2,CD40,CD83,CDKN1A,CDS1,CENPJ,CHD1,CHD7,CHST11,CITED2,CMTM6,CP,CSF1,CTSC,DAAM1,DRAM1,DYNC1H1,EDN1,ENDOD1,EXOC3L4,F2R,FLNB,FMNL2,FMR1,FNDC3A,FRMD4A,FZD1,GADD45G,GBP4,GJA1,GLIPR2,GNG4,GPR126,GPR84,GRAMD1A,HBEGF,HIVEP2,HMGN3,IL15,IL18,IL1A,IL1B,IQSEC2,IRF2,ITGB8,JARID2,KTN1,LIPG,LPAR1,LPHN2,MED13L,…	ABTB2,ADAMTS4,ADAP2,ADRBK2,AEBP2,AFF1,AGRN,AIDA,AIM2,AKT3,ALCAM,ANGPT1,APAF1,AREL1,ARHGAP26,ARHGEF3,ARID5A,ARL4A,ASB13,ATP10A,ATP11B,ATP9B,B4GALT5,BATF2,BCL3,BCL9,BFAR,C4orf32,C5orf30,C6orf106,C8orf44-SGK3,CA2,CACNB3,CAMK2D,CASP12,CASP7,CAV1,CCL22,CCND2,CCRN4L,CD40,CD69,CD83,CD86,CDKN1A,CDS1,CEBPD,CENPJ,CH25H,CHD1,CHD7,CHST11,CITED2,CMTM6,CNN3,COL18A1,COL27A1,CP,CSF1,CSRNP1,CTNNAL1,CTSC,CXCL1,CXC…
MSigDB Perturbation	CHIARADONNA_NEOPLASTIC_TRANSFORMATION_KRAS_UP	Genes up-regulated in transformed NIH3T3 cells (fibroblasts transformed by activated KRAS [GeneID=3845]) vs normal cells.	252	0.00211458	1	0.028228	1.46923	41.5184	61	1267	0.0266608	0.0481452	31	125	126	75,115,153,163,226,239,241,278,279,282,350,378,390,420,440,508,527,544,545,560,564,605,622,709,718,781,836,867,941,982,1074,1145,1158,1166,1258,1316,1328,1368,1433,1507,1555,1631,1648,1679,1728,1802,1845,2047,2088,2107,2219,2256,2309,2334,2484,2502,2607,2675,2719,2753,2763	75,115,153,163,226,239,241,278,279,282,350,378,390,420,438,440,508,527,544,545,560,564,605,622,709,718,781,836,867,941,982,1074,1078,1144,1145,1158,1166,1258,1316,1328,1368,1380,1433,1507,1555,1631,1648,1679,1728,1802,1827,1845,2047,2059,2088,2107,2219,2256,2309,2334,2363,2367,2484,2502,2607,2675,2719,2734,2753,2763,2865,2888,2978,2988,3086,3089,3099,3118,3120,3124,3199,3264,3266,3294,3365,3436,3…	ADAM19,AHCY,ANP32E,APBB1IP,APCDD1,BACH1,CENPV,CTSB,DLK1,EFNB2,EVI2A,FUT8,GDNF,GJA1,HPRT1,ITGA6,ITGB7,LUM,MAPK6,MARCKSL1,PHLDA1,PPAP2B,RAD51,RBL1,RGS16,SET,SLC12A2,SPRED2,THBS2,TIPARP,TOP1	ADAM19,AHCY,ANGPTL2,ANKH,ANP32E,APBB1IP,APCDD1,AREG,AREGB,AURKA,BACH1,BNC1,BZW2,CASK,CASP4,CCL2,CCND1,CCRN4L,CDC7,CENPA,CENPV,CKS1B,CRABP1,CRISP3,CTSB,CTSL,CYTIP,DHX9,DLK1,DNMT1,E2F8,EFNB2,ENSG00000268942,EREG,ERGIC3,ETV4,EVI2A,EVL,FAM3C,FDX1,FIGNL1,FUT8,GDNF,GJA1,GREM2,GTF2A2,H2AFX,HAS2,HMGA2,HMGB3,HNRNPD,HPRT1,IGF2R,IL1RL1,ILF2,ITGA6,ITGB7,IVNS1ABP,KCNN4,KIAA0101,LUM,MAPK6,MARCKSL1,MED10,MRPL18…
MSigDB Perturbation	MONTERO_THYROID_CANCER_POOR_SURVIVAL_DN	Down-regulated genes predicting poor survival of patients with thyroid carcinoma.	253	0.00216327	1	0.0287638	2.77424	3.96505	11	121	0.00480769	0.0909091	5	10	10	6.71534e+37	67,153,380,420,864,1495,1681,2088,2323,2484,2607,2629,3267,3401,3438,4121,4724,5036,5288,5520,5850,6192,6885,6981,7235,8436,8872,9466,9812,10049,10766,11051,11276,11785,12126,13476,14823,14992,15545,15855,17879,17975,18185,18239,18336,18604,18830,18997,19026,19230,20573,20639,21401,21982,24399,25031,25307,26118,26948,27420,27482,28540,29033,30978,31099,31811,31943,31975,33495,33737,33842,34745,35…	APLP2,LMBRD1,PPAP2B,PTPRN2,SH3BGRL2	APLP2,LMBRD1,ORMDL3,PDK2,PPAP2B,PTPRN2,SDK2,SH3BGRL2,SIAH1,TMEM243
MSigDB Perturbation	OHM_METHYLATED_IN_ADULT_CANCERS	Genes showing frequent DNA methylation and which are silenced in adult cancers but remain unmethylated in embryonic carcinoma and embryonic stem (ES) cells.	254	0.00221439	1	0.0293276	1.96881	11.1742	22	341	0.00961539	0.0645161	8	27	27	5,82,110,125,135,157,211,233,399,474,480,499,504,534,677,682,823,1131,1210,1800,1910,2217	5,82,110,125,135,157,211,233,399,474,480,499,504,534,677,682,823,1131,1210,1313,1736,1776,1800,1810,1910,1925,1982,2217,2243,2371,2851,2925,2993,3051,3171,3286,3411,3798,4087,4156,4157,4160,4440,4663,4671,4725,4824,4891,4906,5181,5356,5710,5742,5966,5973,6199,6881,7213,7250,7736,7931,7940,8043,8254,8553,8707,8735,8768,9131,9182,9272,9329,9509,9564,9584,9586,9793,9891,9928,10168,10193,10457,10530,…	ESR1,FHIT,HIC1,MGMT,MLH1,RARB,SFRP1,THBS1	BRCA1,CCND1,CDH1,CDKN2A,CDKN2B,DAPK1,ESR1,FANCF,FHIT,GATA4,GATA5,GSTP1,HIC1,MGMT,MLH1,PYCARD,RARB,RASSF1,RBP1,SFRP1,SFRP2,SFRP4,SFRP5,SOCS1,THBS1,TIMP3,TP73
MSigDB Perturbation	LOPEZ_TRANSLATION_VIA_FN1_SIGNALING	Genes translationally up-regulated in HUVEC cells (endothelium) grown on FN1 [GeneID=2335] compared to those grown on laminin 1.	255	0.00225686	1	0.0297728	1.87448	13.337	25	407	0.0109266	0.0614251	8	34	35	7.51101e+82	75,110,136,239,241,266,426,440,499,504,508,564,622,648,677,733,1130,1174,1231,1351,1555,1845,1893,1910,2730,2907,3286,3693,3791,3798,3983,4087,4205,4423,4752,4813,5165,5215,5419,5577,5742,6835,6881,7018,7104,7213,7261,7989,8166,8558,8634,8668,8736,8751,8988,9094,9131,9151,9167,9260,9268,9514,9584,9589,9892,10193,10320,10457,10547,10651,10789,10877,10973,11071,11340,12186,12650,13014,13132,13161,1…	EFNB2,ILF3,PTMA,SOCS2,SOX4,TGFBR2,THBS1,ZFP36L2	ANP32A,CALD1,DAPK3,DYRK1A,EFNB2,EIF3D,EIF5B,GTF2F1,HOMER3,HOXB7,ILF3,IMP3,MCL1,MMP16,PDE3A,PPP5C,PTBP1,PTMA,RALBP1,RANBP10,RBM25,SH3GLB2,SNRPD1,SOCS2,SOX4,SRPK2,SRPR,SSTR2,STX16,TGFBR2,THBS1,TNPO3,TRIO,ZFP36L2
MSigDB Perturbation	GOUYER_TATI_TARGETS_DN	Genes down-regulated in constitutively invasive HT-29 5M21 cells (colon cancer) vs those expressing functionally inactive TATI [GeneID=6690].	256	0.00229078	1	0.0301022	2.61571	4.58767	12	140	0.00524476	0.0857143	3	15	16	1.62073e+40	16,207,335,535,713,756,1148,1299,1397,1620,1763,1905,2448,2711,2747,3643,3742,4588,4685,5058,6891,7607,8078,8714,8984,9674,12095,12545,13156,14299,15343,16299,16421,17066,17296,17703,17961,18815,19701,20833,21245,21925,21983,22522,22568,22622,22710,23086,23939,24709,25542,26095,26308,26691,26869,27519,28073,28339,28506,29608,29928,30104,30255,30644,30755,31082,31477,32110,32311,34443,35347,35428,…	A4GALT,IGF2,PTP4A3	A4GALT,BMP7,CSPG4,FABP5,FN1,HPN,IGF2,IGFBP2,LOXL4,MAPK12,MCAM,PTP4A3,SNCG,TAGLN,TIMP4
MSigDB Perturbation	SHETH_LIVER_CANCER_VS_TXNIP_LOSS_PAM4	Cluster PAM4: genes down-regulated in hepatocellular carcinoma (HCC) vs normal liver tissue from mice deficient for TXNIP [GeneID=10628].	257	0.00241063	1	0.0315539	1.36831	62.851	86	1918	0.0375874	0.0448384	51	248	253	5,57,70,82,104,125,135,143,150,151,157,184,211,212,233,260,314,321,362,377,429,454,459,510,530,534,575,682,752,767,774,791,805,910,938,953,955,959,968,1041,1118,1130,1166,1177,1190,1212,1234,1261,1290,1298,1335,1382,1405,1471,1486,1605,1660,1666,1747,1772,1783,1800,1814,1844,1860,1889,1980,2016,2041,2072,2082,2085,2132,2169,2179,2194,2200,2230,2246,2256,2288,2328,2471,2527,2591,2616	5,57,70,82,104,125,135,143,150,151,157,184,211,212,233,260,314,321,362,377,429,454,459,510,530,534,575,682,752,767,774,791,805,841,910,938,953,955,959,968,1041,1054,1118,1130,1166,1177,1190,1209,1212,1234,1261,1290,1298,1310,1335,1382,1405,1434,1469,1471,1486,1532,1585,1605,1660,1666,1747,1772,1774,1783,1800,1814,1844,1860,1889,1980,2016,2041,2072,2082,2085,2132,2169,2179,2194,2200,2230,2242,2246…	AANAT,ACAT1,ACSL1,ADCK3,ADTRP,AHCY,AMY1C,ATG5,BHMT,CA1,CACNA1E,CALCRL,CCR5,CD1D,CD40LG,CLEC4G,CXCL12,DCN,EDNRA,EPDR1,GCH1,GDF10,HAAO,HIBADH,IDH1,IGF1,KCNQ5,KIF1B,LAMP2,MBL2,NGFR,NTN1,OLIG1,PDE9A,PDK1,PLEKHB1,PRKAG2,PRLR,PTH1R,PTPRD,RECK,SARDH,SERPINE2,SLC22A7,SLC2A5,SRR,STAB2,SUOX,SUSD4,TBC1D8,TIMM9	AADAT,AANAT,AASS,ABAT,ABCB10,ABCC6,ABHD15,ABHD3,ABI3BP,ACAD8,ACADSB,ACAT1,ACSL1,ACSS2,ACYP1,ADAMDEC1,ADCK3,ADHFE1,ADTRP,AGMAT,AGXT,AHCY,AKR1D1,ALDH6A1,ALDH8A1,ALDH9A1,AMY1A,AMY1B,AMY1C,ARHGAP6,ASIC5,ASL,ATAD3A,ATG5,ATP11A,BAAT,BAD,BAG4,BHMT,BHMT2,BLMH,C7orf10,C7orf55,CA1,CA3,CACNA1E,CALCRL,CBS,CCNF,CCR5,CD163,CD1D,CD3E,CD40LG,CELF2,CHCHD7,CHPT1,CKMT2,CLCN2,CLEC3B,CLEC4F,CLEC4G,CLOCK,CLPX,CNGA2,CO…
MSigDB Perturbation	AFFAR_YY1_TARGETS_UP	Genes up-regulated in MEF cells (embryonic fibroblast) expressing ~25% of YY1 [GeneID=7528].	258	0.00241157	1	0.0314438	1.39883	54.3311	76	1658	0.0332168	0.0458384	40	209	218	21,37,81,114,205,222,248,258,299,307,328,331,335,356,360,406,412,445,473,573,608,614,628,650,684,698,713,722,766,778,842,986,1022,1033,1077,1106,1114,1148,1194,1220,1221,1238,1299,1347,1492,1534,1545,1557,1605,1620,1640,1648,1681,1706,1728,1815,1854,1950,1969,2032,2082,2085,2097,2098,2146,2290,2426,2427,2448,2467,2481,2562,2592,2604,2618,2675	21,37,81,114,205,222,248,258,299,307,328,331,335,356,360,406,412,445,473,573,608,614,628,650,684,698,713,722,766,778,830,842,884,986,1022,1033,1060,1077,1106,1114,1141,1148,1189,1194,1220,1221,1238,1299,1346,1347,1434,1492,1534,1538,1545,1557,1602,1605,1620,1640,1648,1681,1689,1706,1728,1815,1837,1854,1905,1950,1958,1969,2032,2082,2085,2097,2098,2127,2146,2290,2330,2426,2427,2439,2448,2467,2481,2…	ABCD4,ALCAM,ANKRD1,ATP6V0E2,CASP7,CD55,CDKN1A,COL19A1,EBF2,GADD45G,GBP6,HOXA4,HSF2,ITGA9,KIF5B,MDM2,MRVI1,MYCN,NGFR,NNAT,NRG3,PBX4,PROX1,PTP4A3,RAMP2,RND3,RPGRIP1,SEPP1,SFN,SLC2A3,SNURF,SRC,STK25,SULF2,TBX2,TGM2,TINAGL1,UBC,USP20,ZNF385A	ABAT,ABCA1,ABCA3,ABCC5,ABCD4,ACKR3,ACOX1,ACTC1,ADAM15,AJUBA,ALCAM,ANKRD1,ANXA8L2,ATP6V0E2,B4GALT4,BAK1,BCL2L1,BDNF,BEX1,BLCAP,BMP4,BMP6,BTG2,CASP7,CBLN1,CD55,CDKN1A,CDKN1C,CDO1,CELF4,CFH,CFTR,CHODL,CLU,COL10A1,COL19A1,CPEB1,CRYAB,CTNND2,CTSF,DCXR,DGCR14,DMPK,DRD4,DSTYK,DUSP1,EBF2,EFEMP1,EFNA3,EGFR,EHD1,EHF,ELOVL2,ENSG00000167774,EPHA2,EPHA7,EXOC4,FABP3,FAS,FJX1,FLT1,FOS,FXYD2,FXYD6,FYB,GADD45G,GB…
MSigDB Perturbation	BROWNE_HCMV_INFECTION_48HR_UP	Genes up-regulated in primary fibroblast cell culture after infection with HCMV (AD169 strain) at 48 h time point that were not up-regulated at the previous time point, 24 h.	259	0.0024382	1	0.0316683	1.43659	45.9422	66	1402	0.0288462	0.0470756	40	168	172	8,31,57,80,273,312,316,357,382,446,498,505,537,550,556,586,605,628,647,654,708,742,757,768,882,915,928,965,985,1082,1109,1147,1206,1339,1411,1433,1457,1496,1499,1516,1520,1541,1553,1598,1667,1707,1746,1794,1819,1822,1830,1904,1972,1986,2015,2100,2122,2139,2236,2259,2263,2281,2418,2482,2601,2726	8,31,57,80,273,312,316,357,382,446,498,505,537,550,556,586,605,628,647,654,708,742,757,768,882,915,928,965,985,1082,1087,1109,1147,1206,1222,1339,1411,1433,1457,1496,1499,1516,1520,1541,1553,1598,1667,1689,1707,1746,1794,1817,1818,1819,1822,1830,1904,1972,1986,2015,2100,2122,2139,2154,2236,2259,2263,2281,2418,2468,2482,2583,2601,2646,2726,2791,2872,2991,3038,3157,3221,3322,3417,3488,3506,3529,353…	AJAP1,AKAP10,ATF3,ATG12,CALCRL,CCNE1,CD2AP,CD55,DNAJC7,ELAC2,FNBP1L,FUCA1,GRIA1,H2AFZ,HMGN3,IER3,ITPR1,ITPR2,KDM4C,LMO2,MTSS1,NFATC3,NTRK3,NUP205,PDK3,PLCG2,PPM1H,PPT1,PTGES,RFC3,RGS16,SKIL,SLC22A5,SNAPC1,SNCA,TNP1,TOR1B,ZC3HAV1,ZNF330,ZNF365	ABCB7,ABCB9,ABCG1,AJAP1,AKAP10,AMD1,ANXA3,APOM,ATF3,ATG12,ATP11A,ATP6V1B2,BAMBI,BMP6,BRCA1,C19orf57,CALCRL,CASP10,CCNE1,CCNF,CD2AP,CD4,CD55,CDC7,CELSR2,CHST1,CKS2,COBL,COL9A3,CPE,CREBZF,CTH,CTNNA2,CXCR4,CYP1A1,CYP3A4,DHX38,DHX9,DNAJC7,DPT,E2F5,EDN3,EEF1E1,ELAC2,EPM2A,EZR,FAM13A,FNBP1L,FUCA1,FUT9,GAB1,GABPA,GADD45B,GEM,GGCT,GGH,GPD2,GPR18,GREB1,GRIA1,H2AFZ,HADH,HAT1,HMGN3,HSF4,HSPA2,IER3,IFI27,IFI…
MSigDB Perturbation	SMID_BREAST_CANCER_NORMAL_LIKE_UP	Genes up-regulated in the normal-like subtype of breast cancer.	260	0.00246077	1	0.0318386	1.24283	133.567	166	4076	0.0725525	0.0407262	93	433	451	4,15,86,89,96,97,113,126,127,128,131,145,148,150,153,174,185,199,210,216,217,219,223,248,263,267,270,280,282,306,332,353,356,362,386,396,397,399,403,406,414,417,419,420,425,432,448,475,476,482,493,510,514,522,543,561,574,575,581,624,627,641,644,652,666,684,699,719,734,736,737,757,782,787,789,790,791,812,865,867,871,896,906,958,971,973,986,1032,1040,1066,1082,1131,1153,1165,1170,1201,1219,1230,127…	4,15,86,89,96,97,113,126,127,128,131,145,148,150,153,174,185,199,210,216,217,219,223,248,263,267,270,280,282,306,332,353,356,362,386,396,397,399,403,406,414,417,419,420,425,432,448,475,476,482,493,510,514,519,522,543,561,574,575,581,624,627,641,644,652,666,684,688,699,706,719,727,734,736,737,745,757,782,787,789,790,791,812,830,865,867,871,896,906,958,971,973,979,986,1032,1040,1066,1082,1131,1153,…	ACVRL1,ADARB1,ADD3,ADH1B,ANGPT2,ANK2,APOBEC3G,ARID5A,ATP2A3,BAALC,BANK1,BBOX1,CAV1,CCL5,CCR2,CD180,CD1D,CD38,CD40,CD40LG,CLEC4A,COTL1,CTSC,CXCL12,CXCR5,DCN,DDX28,DLK1,DPP4,DTNB,EMCN,EPHA4,EVI2B,EZH1,FAM49A,FLRT2,FZD7,GIMAP4,GIMAP6,GPR183,HIVEP2,HOXA5,IGF1,IL21R,IRF8,ITGA4,ITGB7,LILRA4,LILRB3,LYN,LYVE1,MAPRE2,MATN2,MET,NLRP3,NRXN1,NTRK2,PAX5,PELI2,PIK3CD,PIK3R1,PLA2G2A,PLCB2,PLEKHO1,PNOC,PPAP2B,PR…	AASS,ABCA6,ABCA8,ABLIM1,ACACB,ACAP1,ACTA2,ACVRL1,ADAM28,ADARB1,ADD3,ADH1B,AIF1,ALDH1A1,ANGPT2,ANK2,AOAH,AOC3,APLNR,APOBEC3G,AQP1,ARHGAP15,ARHGAP25,ARHGAP4,ARID5A,ARL4C,ATP2A3,BAALC,BANK1,BBOX1,BCL11A,BCL11B,BIN1,BIN2,BIRC3,BTK,BTN3A2,BTN3A3,C10orf10,C1R,C1S,C3,C7,CASP1,CASP10,CAV1,CCDC88A,CCL19,CCL2,CCL21,CCL5,CCR2,CCR6,CCR7,CD180,CD19,CD1C,CD1D,CD1E,CD2,CD22,CD244,CD247,CD27,CD302,CD37,CD38,CD3D…
MSigDB Perturbation	LOPES_METHYLATED_IN_COLON_CANCER_UP	Genes methylated aberrantly in HCT116 and Colo320 (colon cancer) cells.	261	0.00248766	1	0.0320632	1.91771	11.9935	23	366	0.0100524	0.0628415	10	26	27	5,66,82,125,135,157,211,233,399,425,474,534,682,823,1131,1172,1210,1800,2081,2334,2359,2461,2581	5,66,82,125,135,157,211,233,399,425,474,534,682,776,823,1078,1131,1172,1210,1736,1776,1800,1925,1982,2081,2243,2334,2359,2371,2461,2581,2851,2925,2993,3051,3171,3356,3963,4156,4157,4160,4177,4254,4661,4725,4824,4847,4891,5356,5780,5881,7158,7486,7602,7718,8043,8553,8696,8768,8812,8911,9142,9182,9251,9509,9586,9788,9793,10249,10372,10562,11191,11263,12018,12091,12328,12629,13248,13268,13382,13687,…	CCND2,ESR1,GDNF,HIC1,ITGA4,MGMT,RARB,RARRES1,SFRP1,TWIST1	APBA1,APBA2,CCND2,CDKN2A,DLEC1,ESR1,ESR2,GAD1,GDNF,HIC1,IFNG,ITGA4,MGMT,MT1A,MT1G,NKX2-1,OPCML,PENK,RARB,RARRES1,SCGB3A1,SFRP1,SOCS1,TMEFF2,TNFRSF10C,TWIST1
MSigDB Perturbation	JIANG_HYPOXIA_NORMAL	Genes up-regulated in RPTEC cells (normal kidney) by hypoxia.	262	0.00255087	1	0.0327524	1.31621	82.0537	108	2504	0.0472028	0.043131	63	301	305	10,11,21,83,84,171,187,191,202,219,242,248,255,307,328,351,393,409,417,449,473,510,567,584,599,620,640,650,660,662,711,716,734,778,780,785,796,801,829,831,860,904,917,919,951,961,1035,1046,1059,1070,1106,1127,1171,1172,1176,1180,1208,1221,1241,1248,1270,1283,1286,1334,1382,1399,1410,1412,1462,1467,1514,1530,1551,1659,1672,1694,1790,1823,1836,1852,1869,1881,1914,1997,2065,2098,2158,2181,2259,2260,…	10,11,21,83,84,171,187,191,202,219,242,248,255,307,328,351,393,409,417,421,449,473,510,567,584,599,620,640,650,660,662,711,716,734,778,780,785,796,801,829,831,860,904,917,919,926,951,961,1035,1046,1059,1070,1106,1127,1171,1172,1176,1180,1208,1221,1241,1248,1270,1283,1286,1334,1348,1382,1399,1410,1412,1462,1467,1514,1530,1551,1585,1624,1659,1672,1694,1790,1823,1834,1836,1840,1852,1869,1881,1914,19…	ADAR,ADD3,AKAP12,ANAPC10,ANGPTL4,ANKRD17,ARHGAP8,ARHGEF2,ATP1B3,BNIP3L,BTG1,CAV1,CCND2,CECR5,CITED2,CPD,DPP4,EEF1A1,EHD2,FAM162A,GM2A,GNPDA1,GPR39,GRSF1,GXYLT1,H3F3A,HIF1A,HNRNPC,HOXA4,KHDRBS3,KLF6,KPNB1,MAOA,MARCKS,MDK,MFGE8,MXI1,MYH9,PFDN1,PRR5-ARHGAP8,PTPN12,RAB20,RER1,RNF146,RYBP,SERBP1,SERPINE1,SESN2,SIKE1,SLC2A1,SLC2A3,SNX10,SPAG7,TGM2,TMEM248,TMEM30A,TMEM38A,UBE2O,UGCG,UPP1,WIPF2,ZFP36L1,Z…	A2M,ACTC1,ADAM10,ADAR,ADD3,AFF4,AGPAT2,AK2,AK4,AKAP12,ALDOC,ALKBH5,ALPL,AMH,ANAPC10,ANGPTL4,ANKRD17,ANXA4,AP2B1,AP3M2,ARHGAP19,ARHGAP19-SLIT1,ARHGAP8,ARHGEF1,ARHGEF2,ARIH2,ARL1,ARPC1A,ASPH,ATF7IP,ATP1B3,BLVRB,BNIP3,BNIP3L,BSG,BTG1,C14orf2,C1orf35,C2orf49,CA12,CANX,CAPG,CAV1,CC2D1A,CCND2,CCNJL,CD164,CD2BP2,CD9,CDC34,CDC42,CDCP1,CDK8,CECR5,CFD,CHPT1,CIDEB,CITED2,CKB,CLDN3,CNNM4,CORO1A,CPD,CPNE1,CSD…
MSigDB Perturbation	VERRECCHIA_DELAYED_RESPONSE_TO_TGFB1	ECM related genes up-regulated later than 30 min following addition of TGFB1 [GeneID=7040] in dermal fibroblasts.	263	0.00257366	1	0.0329194	1.91248	12.0262	23	367	0.0100524	0.0626703	10	37	39	1.10111e+82	110,111,354,425,499,504,568,677,907,949,1063,1125,1282,1316,1322,1339,1347,1364,1910,2461,2487,2497,2581,2636,2708,2829,2866,3286,3788,3798,3990,4087,4133,4161,4177,4267,4398,4465,4953,5132,5280,5313,5422,5492,5526,5742,5780,5801,6497,6881,6903,7158,7213,7245,7605,7774,8072,8212,8713,8923,8970,8998,9110,9131,9142,9164,9333,9525,9584,9879,10193,10310,10457,10547,10562,10780,11038,11429,11835,12132…	CTNNB1,DDR1,DVL3,EFNA5,ITGA4,ITGA5,ITGB8,NOTCH2,THBS1,THBS2	ARHGAP1,COL16A1,COL8A1,CTNNA1,CTNNB1,DDR1,DSP,DVL3,EFNA5,EPHA2,EPHB2,EPHB4,IGFBP4,ILK,ITGA4,ITGA5,ITGB3,ITGB8,LAMB1,MMP11,MMP17,MMP2,MTA1,NEO1,NME4,NOTCH2,PAK2,RAC1,RAC2,RHOD,SEMA3F,SMO,THBS1,THBS2,TNC,TNFRSF1A,WNT8B
MSigDB Perturbation	IWANAGA_CARCINOGENESIS_BY_KRAS_PTEN_DN	Cluster 2: genes down-regulated in lung tissue samples from mice with oncogenic form of KRAS [GeneID=3845] and inactivated PTEN [GeneID=5728].	264	0.00258178	1	0.0328981	1.27967	102.371	131	3124	0.0572552	0.0419334	82	319	330	21,57,60,75,87,105,121,143,155,191,192,228,238,239,241,263,281,307,368,369,385,396,399,408,422,436,440,453,465,473,508,517,538,541,543,545,564,584,622,646,650,668,683,695,699,701,737,767,778,789,856,875,955,1064,1066,1081,1091,1106,1119,1155,1180,1221,1261,1267,1286,1293,1303,1307,1323,1353,1355,1366,1385,1398,1539,1545,1555,1584,1635,1700,1702,1720,1757,1762,1830,1845,1852,1873,1889,1907,1942,19…	21,57,60,75,87,105,121,143,155,191,192,228,229,238,239,241,263,281,307,368,369,385,396,399,408,422,436,438,440,453,465,473,508,517,538,541,543,545,564,584,622,646,650,668,683,688,695,699,701,724,737,745,767,778,789,856,875,929,955,960,974,1005,1060,1064,1066,1081,1091,1106,1115,1119,1128,1141,1144,1155,1180,1204,1221,1261,1267,1286,1293,1303,1307,1323,1353,1355,1366,1385,1398,1439,1487,1539,1545,…	ABCD2,ADRB1,AKAP12,ARHGEF2,AUH,B3GNT6,BTBD6,CACNA1A,CALCRL,CD93,CD97,CELF6,CLEC14A,CLEC2L,CYTH3,DAAM1,DCLK1,DPF1,EBF1,EFNB2,ELF4,ELMSAN1,FOXF2,FOXK2,FOXO1,GIMAP6,GNAS,GTF2I,HEBP2,HIP1,HK1,HS3ST3B1,INSR,IRF8,ITGB3BP,ITPR2,KITLG,KLF4,KLF6,KRT80,LPHN2,MAP7,MARCKS,MEIS2,MINPP1,MRPL54,MUC4,NCALD,NDST3,OPRK1,PAPPA2,PDE4DIP,PDZD2,PFKFB3,PICALM,PLXDC2,PMP22,PRDM1,PSEN1,PTPRD,PTPRK,RAMP2,RGMB,RHOJ,SATB1,S…	ABCB1,ABCB6,ABCD2,ABHD17C,ABTB2,ACTC1,ADCY8,ADRB1,AKAP12,ALDH1A1,AMIGO1,AMZ1,ANGPTL2,ANKRA2,ARHGAP18,ARHGAP25,ARHGEF2,ARHGEF4,ARID4B,ASCL3,ATP10D,ATP13A4,AUH,B3GALNT2,B3GNT6,BGN,BICD2,BRCA1,BTBD6,C10orf10,C12orf23,CABP2,CACNA1A,CACNG2,CALCRL,CAV2,CBFA2T3,CBR3,CCDC134,CCND3,CCNJL,CD28,CD93,CD97,CDON,CDT1,CELF6,CETN1,CHIC2,CHSY1,CIR1,CLDN5,CLEC14A,CLEC2L,CLIP1,CNN1,CNR2,COL4A1,CORO1A,CRIPT,CRISP3,C…
MSigDB Perturbation	TSENG_ADIPOGENIC_POTENTIAL_DN	Genes showing decreasing expression in brown preadipocytes with increasing ability of the cells to differentiate.	265	0.0025853	1	0.0328186	1.8069	14.9427	27	456	0.0118007	0.0592105	13	44	46	8.41532e+94	84,153,231,364,396,420,565,781,835,936,961,989,1314,1545,1591,1607,1648,1658,1728,1736,1869,1925,1926,1982,2065,2088,2182,2243,2297,2315,2371,2484,2607,2675,2718,2774,2799,2851,2924,3199,3324,3611,3661,3801,4020,4233,4240,4297,4357,4365,4453,4528,4566,5091,5133,5288,5369,5489,5520,5611,5802,5821,5895,5937,5999,6023,6307,6460,6519,6640,6892,6931,6980,7103,7212,7322,7328,7360,7625,7797,7996,8001,81…	B3GALNT1,COL4A2,GJA1,HLX,IL6ST,ITIH2,LPAR1,PHKA2,PPAP2B,RAB9A,RAMP2,SNAI2,THBD	ADAM23,AOC3,ART3,B3GALNT1,CAPN6,CDKN2C,CMBL,COL4A2,COL6A1,COL6A3,CST3,DKK3,EBF3,ENPP1,EPHB6,FMO1,GAS2,GHITM,GJA1,GSTT1,HLX,HSBP1,IL1R1,IL6ST,ITIH2,LPAR1,NMB,NRP1,PAX3,PHKA2,POPDC3,PPAP2B,PPL,RAB9A,RAMP2,SESN1,SFRP2,SIX1,SMS,SNAI2,SPARCL1,TGFBI,THBD,TSC22D1
MSigDB Perturbation	LABBE_WNT3A_TARGETS_DN	Down-regulated genes in NMuMG cells (mammary epithelium) after stimulation with WNT3A [GeneID=89780].	266	0.00259546	1	0.0328238	1.64115	22.5451	37	688	0.0161713	0.0537791	20	89	94	15,23,81,113,117,128,133,145,149,174,210,332,381,411,419,449,955,1027,1033,1055,1110,1112,1217,1342,1351,1392,1422,1430,1545,1576,1976,2200,2298,2337,2443,2655,2730	15,23,81,113,117,128,133,145,149,174,210,332,381,411,419,437,449,955,1027,1033,1055,1110,1112,1217,1342,1351,1392,1422,1430,1545,1576,1976,2200,2298,2337,2399,2443,2655,2730,2890,2934,2965,2978,2991,3022,3079,3563,3693,3707,3786,3870,3977,4050,4094,4390,4543,4585,4775,4897,4945,4968,5211,5243,5347,5365,5369,5419,5546,5779,5945,5988,6041,6055,6089,6336,6429,6534,6680,6686,6783,6795,6933,7039,7082,…	CASP7,CCL20,CD33,CLDN11,DHRS3,EZH1,FGF7,FMR1,GNG4,GRIN2A,LHX9,MR1,NAB1,SCG2,TGFBR2,TLR5,TNFRSF1B,TOLLIP,TSHZ1,UGCG	ABCC9,ASS1,B3GALT1,C3AR1,CASP7,CBLN3,CCL20,CD14,CD33,CDH11,CFC1B,CFH,CHEK1,CHRNA7,CLDN11,CNR2,CYP2J2,CYP3A7,CYP4A22,DCT,DGAT1,DHRS3,DNASE2B,EMP1,ERBB3,EZH1,FGF7,FLT1,FLT3,FMR1,FOXN1,GIF,GML,GNG4,GPR19,GREM2,GRIN2A,GSTA4,HAO1,HEBP1,HEY1,HIST1H1C,HPGD,INSM2,ITM2A,LDHB,LGALS4,LHX9,MAL,MAP4K2,MMP13,MMP24,MR1,MUSK,NAB1,NDRG1,NRK,OPRM1,ORC2,PANK1,PGK1,PPARD,PRKCB,PTER,PTS,RAB33A,S100A6,SCG2,SEMA5A,SERP…
MSigDB Perturbation	MAYBURD_RESPONSE_TO_L663536_DN	Genes down-regulated in H720 cells (lung cancer) after treatment with L663536 (MK886) [PubChem=105049], an inhibitor of leukotriene biosynthesis.	267	0.00270458	1	0.0340758	1.82398	14.2545	26	435	0.0113636	0.0597701	13	53	54	1.31156e+88	131,156,185,196,217,318,414,426,441,722,734,736,871,902,933,1305,1374,1401,1683,1787,2038,2260,2468,2469,2479,2571,2598,2879,2891,3136,3141,3287,3954,4383,4502,4738,4774,4783,4803,5573,5578,5885,6007,6074,6092,6331,6366,6582,6906,7173,7232,7329,7411,7478,7530,7592,7618,7619,7682,7860,7948,8539,8601,8607,8771,8796,8960,8974,9111,9127,9170,9332,9412,9451,9802,10161,10512,10563,10675,10850,10907,110…	BUB3,HMGB1,KPNA1,LAPTM4B,MED21,MRPL42,NDC1,PROX1,SLC30A5,SNX10,SRSF7,STK17A,YWHAQ	ACTB,ADPGK,ALDOB,AMD1,BUB3,C4orf3,C7orf73,CCNC,CCNG2,CDK1,CPE,CSTF3,CYCS,DDOST,DDX11,ENSG00000198843,EZR,GNPDA2,HMGB1,HMMR,HSDL2,IFNAR1,KPNA1,LAPTM4B,MED21,MRPL42,MSH2,NDC1,NOLC1,OSGEPL1,PCID2,PEG10,PLSCR1,PPA2,PROX1,PSME3,RPL15,RQCD1,S1PR5,SLC30A5,SLC39A6,SNX10,SNX5,SRRM1,SRSF7,STK17A,TMEM50B,TMTC4,TUBGCP5,USP15,YWHAQ,ZNF207,ZNF585A
MSigDB Perturbation	SCHLESINGER_METHYLATED_DE_NOVO_IN_CANCER	Genes bearing H3K27me3 mark or whose promoters are bound by the polycomb proteins SUZ12 or EED [GeneID=23512;8726]; their DNA is methylated de novo in cancer.	268	0.0027267	1	0.0342262	1.55521	28.9351	45	883	0.0196678	0.0509626	24	85	88	5,26,60,82,125,135,155,157,208,211,233,264,280,308,359,360,396,399,534,555,682,693,701,705,791,921,1068,1069,1338,1451,1534,1608,1621,1682,1693,1800,1918,2072,2211,2225,2299,2370,2558,2590,2684	5,26,60,82,125,135,155,157,208,211,233,264,280,308,359,360,396,399,534,555,682,693,701,705,791,921,1060,1068,1069,1115,1338,1451,1534,1608,1621,1682,1693,1800,1810,1918,2056,2072,2211,2225,2299,2370,2456,2558,2590,2605,2684,2713,2772,2847,2881,2904,2934,2983,2994,3028,3127,3159,3161,3188,3208,3266,3298,3376,3385,3454,3465,3539,3590,3607,3683,3762,3789,3797,3808,3870,3970,4077,4111,4255,4318,4330,…	ALX3,BCL2,CD44,CDH13,CXCL12,DCC,DSC3,DUSP6,FOXA2,GADD45G,GNAS,HIC1,KLF4,LAMA3,NTRK2,PAX5,PMP22,PTHLH,RASSF5,RBP7,SFRP1,TBX3,THBD,VDR	ALX3,AMN,APBA1,ASIC2,BCL2,CACNA1G,CALCA,CCNA1,CD44,CDH13,CDH4,CDKN2C,CDX2,CEBPD,CHRDL1,CRIP1,CXCL12,CYP27B1,DCC,DLC1,DSC3,DUSP6,EGR3,EPHX3,ETFA,EVA1C,FBN1,FEZ1,FOXA2,FOXE1,GADD45G,GATA4,GATA5,GJB2,GNAS,GPC3,HBA1,HBA2,HIC1,HOXB13,HRK,JUN,KCNQ1,KISS1R,KLF4,LAMA3,LGALS3,MT1A,MT3,NDRG1,NKX3-1,NPTX1,NR2F2,NTRK2,PAX5,PAX6,PCDH11X,PCDH11Y,PGR,PMP22,POU3F1,PPP1R13B,PRKG1,PTHLH,PXMP2,PYCARD,RARA,RASSF5,RB…
MSigDB Perturbation	XU_RESPONSE_TO_TRETINOIN_AND_NSC682994_UP	Genes up-regulated synergistically in NB4 cells (acute promyelocytic leukemia, APL) by tretinoin and NSC682994 [PubChem=444795;388304].	269	0.00273147	1	0.0341587	2.56083	4.68597	12	143	0.00524476	0.0839161	5	16	17	1.15213e+41	115,212,619,752,836,982,1486,2186,2256,2309,2502,2651,3089,3530,3904,4014,4137,4416,4737,5434,6227,7038,8153,8253,8300,8859,9534,10149,10168,10402,10991,11840,12290,12998,13474,13737,13781,14007,15000,15802,16971,17084,17279,18124,18165,18493,18644,18791,18792,18891,19025,19465,19822,19873,20104,20150,20368,20915,21440,21931,23118,23335,24153,24332,25959,26042,26432,27901,28957,30154,30165,30428,…	BIRC2,CD53,ITGA6,LAMP2,MYH9	ANXA1,AP1G2,BIRC2,CD53,GAS7,GSTP1,HDAC1,ICAM3,IL8,ITGA6,LAMP2,MYH9,NMI,STAT1,STK10,TNFSF10
MSigDB Perturbation	LEE_DOUBLE_POLAR_THYMOCYTE	Genes enriched in the double polar (DP) thymocyte compared to all other T lymphocyte differentiation stages.	270	0.00275227	1	0.0342913	2.20935	7.24196	16	221	0.00699301	0.0723982	7	24	24	7.52392e+52	75,239,241,362,440,508,564,575,622,795,960,1012,1122,1422,1555,1556,1845,2953,3073,3983,4099,4126,4485,4752,4859,5215,5382,5704,5862,6144,6863,7282,7704,7747,8334,9162,10068,10766,11045,11535,12084,12480,12761,12917,13816,14016,14577,14746,14867,15003,15341,15402,15795,16126,16983,17089,17369,17958,18307,18319,18362,18421,18483,18758,19296,19979,20043,20403,20565,20997,21110,21526,21762,21808,228…	BCL6,CD1D,EFNB2,LHFPL2,LYST,MCTP1,TBC1D19	ACSBG1,BCL6,C3orf52,CALN1,CD1C,CD1D,CD8A,CD8B,CIB2,CPLX1,CYP2U1,DNMBP,EFNB2,ELOVL4,LHFPL2,LYST,MCTP1,RASD1,RIPK4,RORC,SH2D1A,SLAMF1,SLC7A3,TBC1D19
MSigDB Perturbation	THEILGAARD_NEUTROPHIL_AT_SKIN_WOUND_UP	Genes up-regulated in polymorphonuclear neutrophilic granulocytes (PMNs) attracted to skin wounds.	271	0.00278405	1	0.0345592	1.58039	26.5757	42	811	0.0183566	0.0517879	25	76	77	94,96,252,461,462,567,663,672,705,711,820,860,921,937,969,978,1099,1105,1207,1271,1339,1350,1450,1514,1573,1609,1621,1756,1770,1950,2028,2124,2165,2175,2181,2282,2316,2319,2392,2590,2705,2726	94,96,252,461,462,567,663,672,705,711,820,860,921,937,969,978,1099,1105,1207,1271,1339,1350,1450,1514,1573,1609,1621,1756,1770,1950,2013,2028,2124,2165,2175,2177,2181,2282,2316,2319,2392,2439,2590,2705,2726,2859,2893,3132,3159,3208,3238,3266,3341,3346,3366,3400,3507,3519,3532,3621,3629,3644,3725,3753,3843,3881,3975,4020,4091,4255,4317,4330,4380,4415,4516,4750,4819,4832,4846,4865,4902,4988,5060,50…	AHR,AQP9,ATP6V1C1,CD44,CHD1,EEF1A1,HCAR3,HIVEP1,HMGA1,HNRNPC,IER3,IL1B,LGMN,NAMPT,NCOR2,PLEK,PPP2R2A,SKIL,SLC25A13,TANK,TRAF3,TRIB1,UPP1,VDR,VEGFA	AHR,AQP9,ATP1A1,ATP6V1C1,AZIN1,BCL2A1,CALU,CASP9,CCL2,CCL3,CD44,CFLAR,CHD1,CLCN7,CXCL2,CXCL3,DLGAP1,EEF1A1,EGR3,EIF4A1,EIF5,ETS2,GABARAPL2,GNL1,GPR18,GPR65,HCAR3,HIVEP1,HMGA1,HNRNPC,IDI1,IER3,IL1B,IL1R1,IL8,KAT5,KLF10,KLRG1,LAMB3,LCP2,LGMN,M6PR,MAP2K3,MTHFD2,MYL4,NAMPT,NCOR2,NFE2L2,NFKB1,OXSR1,PHF1,PI3,PLAU,PLEK,PPP2R2A,PTPRE,RAB1A,RPS16,RPS27,SH2B2,SKIL,SLC25A13,SLC25A6,SRP54,TAF6L,TANK,TFEC,TGF…
MSigDB Perturbation	AZARE_NEOPLASTIC_TRANSFORMATION_BY_STAT3_UP	Genes up-regulated in RWPE-1 cells (prostate cancer) upon expression of constitutively active form of STAT3 [GeneID=6774].	272	0.00279704	1	0.0345928	3.05166	2.94921	9	90	0.00393357	0.1	4	16	16	8.02884e+31	80,288,446,1206,1217,1392,1946,1951,2513,2756,3488,5988,6072,6336,6899,7709,11341,11888,13646,14089,14572,14710,14962,15468,17731,18171,18842,19848,21241,21395,21585,22299,22358,22489,25522,25926,26831,29259,31668,32343,32581,33460,36038,36179,36243,36582,38763,38937,39399,39558,39791,40080,41521,42532,43307,46083,46260,46599,48680,49456,51994,52088,52237,52640,53067,54438,55222,56764,56925,59295…	CCL20,FOXG1,PTGES,PTGS1	ADIRF,AQP3,CCL20,CDA,CPE,FARP1,FOXG1,HR,HSPG2,KRT13,PEG10,PLAC8,PPL,PTGES,PTGS1,TFPI
MSigDB Perturbation	ULE_SPLICING_VIA_NOVA2	Genes whose splicing in neocortex was most affected by knock out of NOVA2 [GeneID=4858].	273	0.00285719	1	0.0352072	1.7169	18.0557	31	551	0.013549	0.0562613	13	43	43	5,67,82,111,125,135,144,157,160,211,233,250,270,534,682,1016,1125,1257,1282,1364,1441,1719,1800,1934,2041,2323,2451,2487,2574,2579,2738	5,67,82,111,125,135,144,157,160,211,233,250,270,534,682,1016,1125,1257,1282,1364,1441,1719,1780,1800,1934,2041,2196,2323,2451,2487,2574,2579,2658,2691,2738,2829,2866,2879,2976,3463,3464,3705,3952,4161,4212,4216,4223,4276,4460,4478,4522,4587,4724,5149,5237,5535,5790,5967,6233,6497,6718,6731,6792,7060,7186,7515,7755,7876,7952,8016,8026,8067,8203,8286,8516,8563,8580,8730,8970,9000,9089,9120,9164,933…	ANK3,APLP2,ARHGAP21,CADM1,CLASP1,CLSTN1,EFNA5,EPB41L2,LRP1B,MAP4K4,NTNG1,SPTAN1,SRR	AGRN,ANK3,APLP2,ARHGAP21,ATP2B1,BPTF,CACNA1B,CADM1,CAMK2G,CASK,CHL1,CLASP1,CLSTN1,CTNNA2,DNAJB5,EFNA5,EPB41,EPB41L2,EPB41L3,EPHA5,GOLGA4,GPHN,GPR45,GRIK2,GRIN1,IDH3B,KCNMA1,KCNQ2,LRP12,LRP1B,MAP4K4,MAPK8IP1,NCDN,NTNG1,PLCB4,PTPRF,RAP1GAP,SPTAN1,SRR,STX2,STXBP2,TACC2,TPM3
MSigDB Perturbation	MULLIGHAN_MLL_SIGNATURE_1_UP	The 'MLL signature 1': genes up-regulated in pediatric AML (acute myeloid leukemia) with rearranged MLL [GeneID=4297] compared to all AML cases with the intact gene.	274	0.00290506	1	0.0356665	1.31241	81.5294	107	2488	0.0467657	0.0430064	78	358	369	24,33,34,43,71,76,89,96,116,181,248,260,267,282,300,306,310,338,350,369,377,382,397,408,410,470,472,527,543,590,616,643,659,666,734,794,800,817,829,867,910,922,943,988,1030,1049,1092,1159,1177,1186,1201,1214,1230,1242,1259,1306,1342,1357,1366,1385,1422,1465,1501,1544,1550,1552,1558,1572,1582,1637,1700,1737,1738,1764,1777,1793,1877,1919,1964,2081,2113,2114,2141,2142,2165,2172,2184,2198,2200,2239,2…	24,33,34,43,71,76,89,96,116,181,248,260,267,282,300,306,310,338,350,369,377,382,397,408,410,437,470,472,527,543,590,616,643,659,666,734,794,800,817,829,852,867,898,910,922,943,960,988,1030,1049,1092,1159,1177,1186,1201,1209,1214,1230,1235,1242,1249,1259,1306,1342,1357,1366,1385,1422,1428,1437,1465,1477,1501,1544,1550,1552,1558,1572,1578,1582,1585,1637,1700,1737,1738,1741,1764,1777,1793,1877,1919,…	ABHD2,ABR,ACTR2,ADARB1,ADCY9,ARHGEF3,ARPC2,ATP5SL,BEGAIN,CALM1,CCR1,CDC42EP3,CEBPG,CLTCL1,CNPY3,DACH1,DHRS7B,DPEP2,DUSP7,EHBP1L1,EIF4EBP2,ELF4,ENO1,EPHB3,EVI2A,EVI2B,FAM53B,FUCA1,FZD2,GNS,HIC2,HOXA4,HOXA5,INSR,IQCE,IQSEC1,IRF8,ITGAX,ITGB7,LILRB2,LPCAT1,LTB4R,LYST,MFSD1,MGST2,MR1,MYO1F,NINJ2,NIPBL,NLRP3,NUBP1,NUP210,NUP50,PPIF,PSEN1,RASSF2,RBBP8,RBM23,RCAN1,RECK,RPS6KA1,RRP7A,RXRA,SEL1L3,SIPA1,SLA…	ABCA7,ABCA8,ABHD17A,ABHD2,ABR,ACTR2,ADARB1,ADCY7,ADCY9,ADGB,ADRB2,AK2,AKR7A3,ALDH3A2,APOBR,ARHGAP1,ARHGAP11A,ARHGEF3,ARHGEF40,ARL6IP5,ARPC1B,ARPC2,ARPC4,ASPSCR1,ATG3,ATP5SL,ATP6V0E1,ATP8B4,B4GALT1,BATF,BEGAIN,BID,BMP5,C11orf21,C12orf5,C1RL,C1orf54,CALM1,CALM2,CALM3,CAND2,CAPG,CASP1,CAT,CBFB,CCL23,CCND3,CCPG1,CCR1,CD2BP2,CD300C,CD302,CDC42EP3,CEBPA,CEBPG,CEP63,CHD3,CLEC3B,CLTB,CLTCL1,CNIH4,CNPY3,C…
MSigDB Perturbation	BOYAULT_LIVER_CANCER_SUBCLASS_G1_UP	Up-regulated genes in hepatocellular carcinoma (HCC) subclass G1, defined by unsupervised clustering	275	0.00296261	1	0.0362408	1.54819	29.0661	45	887	0.0196678	0.0507328	27	108	112	37,51,67,144,222,244,315,340,343,546,635,766,811,880,899,943,955,1000,1022,1077,1085,1093,1100,1113,1143,1305,1339,1379,1423,1525,1557,1563,1719,1743,1811,1916,1991,2099,2323,2462,2477,2490,2504,2539,2669	37,51,67,144,222,244,315,340,343,546,635,766,811,880,899,943,955,1000,1022,1077,1085,1093,1100,1113,1143,1252,1305,1339,1379,1423,1449,1474,1525,1557,1563,1719,1743,1811,1916,1991,2099,2127,2212,2323,2402,2462,2477,2490,2504,2539,2546,2669,2815,2892,2905,2914,2943,3050,3403,3433,3487,3734,3752,3823,3874,3883,4001,4027,4136,4172,4216,4223,4299,4352,4430,4468,4478,4513,4590,4626,4657,4793,4798,4943…	ADAR,ARHGEF3,C2CD5,CCZ1B,CDK19,DDR1,EDEM3,FNBP1,HIC2,INPP5A,KCTD3,KDM5B,LBR,MAP4K4,MARCH3,MATN2,MPZL1,NCOA3,PLXNA2,PRRC2C,RPL17,SOX13,SOX9,ST14,TLR5,TNFSF4,TTLL4	ABCC10,ABHD3,ADAR,AHNAK,ARHGEF3,ARID3A,ATP2B1,ATP5G2,B4GALT3,BRD3,C2CD5,CACNA1D,CCZ1,CCZ1B,CDK19,CLDN7,CRNKL1,CTNND2,CXADR,DCPS,DDR1,DHRS7,DNAJC9,EDEM3,EPHB4,EXOC2,F11R,FAM168B,FNBP1,GPR56,HIC2,HNRNPA0,HOOK2,IDUA,IKBKAP,INPP5A,KCTD3,KDM5B,LBR,LLGL2,LMNA,MAP4K4,MAPK13,MARCH3,MATN2,MEX3D,MGP,MMP11,MPZL1,MYO5C,MYRF,NAP1L1,NCOA3,NOTCH2NL,NREP,NRXN3,NTAN1,NUP133,PAIP1,PDCD4,PDGFA,PEG3,PIAS4,PLXNA2,POG…
MSigDB Perturbation	POMEROY_MEDULLOBLASTOMA_PROGNOSIS_UP	Top marker genes in medulloblastoma associated with good response to treatment (good outcome).	276	0.00298008	1	0.0363224	2.03444	9.33918	19	285	0.0083042	0.0666667	10	44	47	4.71553e+66	47,155,273,312,550,568,737,985,1290,1411,1537,1688,1752,1863,1957,2139,2264,2349,2511,2847,3329,4170,4640,4845,5137,5255,5267,5366,5426,5525,5589,5719,5776,5916,6060,6284,6307,6870,6911,7011,7228,7859,8071,8240,8297,8504,8715,8717,9153,9448,9884,9936,10159,10301,10533,10885,11136,11140,11308,11453,11721,11768,11952,12105,12269,12700,12769,12862,12950,12982,13090,13167,13343,13569,13983,14327,1438…	ACADVL,ACSL1,DVL3,GNAS,GTF3C1,MINOS1-NBL1,NTRK3,SATB1,SLCO2A1,USP4	ACADVL,ACSL1,AES,AIP,AMT,AP3B2,APOD,ASIC1,ATRX,C19orf57,CALML3,COL6A2,CRMP1,DVL3,DYNLT1,ECH1,ELN,ETV4,GAP43,GNAS,GPS2,GTF3C1,IDUA,IRF3,KMT2A,MINOS1-NBL1,MYL6,NBL1,NDN,NHLH1,NTRK3,PLOD1,PTK7,RALGDS,RASL10A,REEP5,RTN1,SATB1,SLCO2A1,SRP54,TERF1,TMSB4X,USP4,ZKSCAN7
MSigDB Perturbation	MATSUDA_NATURAL_KILLER_DIFFERENTIATION	Genes changed between developmental stages of Valpha14i natural killer T lymphocyte cells (NKT).	277	0.00301384	1	0.0366013	1.23546	135.172	167	4125	0.0729895	0.0404849	106	454	464	2,15,32,40,48,53,60,77,87,113,122,128,136,145,150,160,162,163,174,178,195,210,214,218,250,273,281,305,312,315,326,332,333,356,380,419,426,434,436,462,470,497,514,526,540,550,553,580,629,652,659,669,675,683,685,687,705,725,731,733,742,783,799,846,866,878,887,910,914,921,937,938,942,970,971,973,985,986,997,1008,1012,1039,1064,1067,1102,1177,1180,1194,1207,1223,1237,1263,1271,1280,1281,1292,1327,135…	2,15,32,40,48,53,60,77,87,113,122,128,136,145,150,160,162,163,174,178,195,210,214,218,250,273,281,286,305,312,315,326,332,333,356,380,419,426,430,434,436,437,462,470,497,514,526,540,550,553,580,629,652,659,669,675,683,685,687,705,725,731,733,742,783,799,826,840,846,866,878,887,910,914,921,937,938,942,949,960,970,971,973,985,986,997,1008,1012,1039,1063,1064,1067,1096,1102,1107,1115,1117,1177,1180,…	AGPAT6,AHR,AP3S2,APCDD1,ARL6,B3GNT5,BHLHE40,CADM1,CALML4,CAMK4,CCL5,CCR1,CCR5,CCR9,CD38,CD44,CDC23,CHCHD6,CISD1,COL19A1,CPD,CSRP1,CTSD,CXCR6,DAPK2,DENND5A,DHRS3,DHRS4,DNAH8,DPH5,EBF1,EBF2,EDIL3,ENDOD1,F2R,F2RL1,FAM101B,FAM213A,GALNT3,GPR34,GRAMD3,GTF2A1,GTF2IRD1,HIP1,ICA1,IGF1,IL1B,KIF1B,KLF4,KLF6,LGI1,LIMD2,LYST,MAN1A1,MAP4K5,MARCKSL1,MCM5,MCM7,MERTK,MPEG1,MRPL54,MYCN,MYO1F,NAPSA,NEDD9,NTRK3,NUC…	AARSD1,ABCB1,ABCB9,ABCE1,ACLY,ACSF3,ACTB,ACTR1A,AGPAT6,AHNAK,AHR,AIP,AKAP9,AKR1C3,ALDOA,ALS2,ANXA1,AP3S2,APCDD1,ARF6,ARHGAP24,ARL6,ASNS,ASPN,ATAD3A,ATMIN,ATP13A2,ATP5G1,ATP6AP2,ATP6V1E1,B3GNT5,B4GALNT1,BCAS2,BCL11B,BHLHE40,BICD1,BNC1,BRD3,BUB1B,BUD31,CA8,CACNA2D3,CACNB4,CADM1,CALML4,CAMK4,CARD10,CCL4,CCL5,CCR1,CCR5,CCR7,CCR9,CCT7,CD160,CD244,CD247,CD302,CD36,CD38,CD44,CD7,CDC23,CDCA5,CDH1,CDK4,CH…
MSigDB Perturbation	FARDIN_HYPOXIA_11	Genes in the hypoxia signature, based on analysis of 11 neuroblastoma cell lines in hypoxia and normal oxygen conditions.	278	0.00303505	1	0.0367263	1.91819	11.4692	22	350	0.00961539	0.0628571	12	32	32	9.42903e+78	94,290,328,417,509,510,742,980,1263,1350,1382,1462,1514,1836,1939,2086,2098,2100,2122,2162,2256,2260,2432,2822,2888,2934,2998,3097,3168,3238,3518,3629,3747,3863,3870,3928,4004,4416,4495,4516,4597,5211,5222,5269,5360,5625,5779,6480,6629,6681,6726,7030,7368,7522,7711,7721,8096,8377,8547,8914,8956,9091,9603,9667,9930,9932,9997,10308,10334,10377,10950,11173,11375,11564,11671,12357,12453,12942,12951,1…	ANGPTL4,BHLHE40,BNIP3L,BTG1,DDIT4,FAM162A,IGF1R,MXI1,PDK1,SLC2A3,VEGFA,ZNF395	AK4,ALDOC,ANGPTL4,ANKRD37,BHLHE40,BNIP3,BNIP3L,BTG1,DDIT4,EGLN1,EGLN3,FAM162A,FUT11,IGF1R,IGFBP3,KDM3A,MAPT,MTFP1,MXI1,NDRG1,P4HA2,PDK1,PFKFB4,PGK1,PGM1,PLOD1,SLC2A3,TNIP1,TPI1,TXNIP,VEGFA,ZNF395
MSigDB Perturbation	ZHONG_RESPONSE_TO_AZACITIDINE_AND_TSA_UP	Genes up-regulated in 3 out of 4 NSCLC cell lines (non-small cell lung cancer) after treatment with azacitidine [PubChem=9444] and TSA [PubChem=5562].	279	0.00305149	1	0.0367929	1.46541	38.8969	57	1187	0.0249126	0.0480202	33	171	195	6,11,17,34,42,45,73,173,265,270,382,447,457,623,639,642,715,742,744,829,847,893,1003,1118,1134,1258,1262,1352,1368,1407,1472,1480,1572,1601,1727,1852,1916,1931,1943,1970,1986,2032,2055,2100,2122,2181,2235,2290,2311,2539,2579,2630,2643,2654,2687,2706,2726	6,11,17,34,42,45,73,173,265,270,382,447,457,623,639,642,715,742,744,829,847,853,893,1003,1107,1118,1134,1258,1262,1302,1345,1352,1368,1407,1453,1472,1480,1490,1572,1601,1663,1712,1727,1852,1855,1916,1931,1943,1970,1986,2032,2055,2100,2122,2181,2235,2251,2290,2311,2332,2436,2495,2539,2579,2630,2643,2654,2672,2677,2687,2706,2709,2726,2865,2912,2979,2991,3108,3133,3147,3152,3180,3416,3450,3493,3509,…	ABHD2,AKAP12,ARF4,ASB6,ATF3,ATP6V0C,CDKN1A,CLIC3,CYP26A1,DPEP3,FUCA1,GCH1,HSD17B6,INPP5F,ITPR1,KLF12,MAFB,MKLN1,MPZL1,NNAT,ODC1,PARP12,PIK3CD,PKP2,PLAC1,RAPGEF2,SH2B3,SKIL,SMPD3,SPAG9,SPHK1,TUBA3C,UPP1	AAMDC,ABHD2,AFF4,AGGF1,AK1,AKAP12,AKAP17A,ALPP,APBB2,APOBEC3B,APOLD1,ARF4,ASB6,ATF3,ATP6V0A1,ATP6V0C,ATP6V1D,BAIAP3,BMPR2,C3orf52,C6orf106,CARD14,CD9,CDKN1A,CDKN2D,CDO1,CGREF1,CLGN,CLIC3,CLMN,CLTB,COL1A2,CSRP2,CTSV,CYLD,CYP26A1,DAZL,DGKZ,DNAJB2,DNMBP,DPEP3,DUSP14,ECM1,EGR2,EHD1,EHD4,ENO2,F11R,FERMT2,FHL1,FKBP1B,FLNC,FUCA1,GAB2,GCH1,GDF11,GLS,GOSR2,HABP4,HCLS1,HDAC5,HIST1H1C,HIST1H2BC,HIST1H2BG,HI…
MSigDB Perturbation	HUNSBERGER_EXERCISE_REGULATED_GENES	Exercise regulated genes in hyppocampus.	280	0.00310347	1	0.037286	2.07283	8.6838	18	265	0.00786713	0.0679245	10	30	31	1.05133e+59	105,133,149,160,250,280,323,604,695,701,764,776,829,1027,1407,1430,1682,1712,2567,2684,2713,2726,3228,4077,4094,4254,4473,4689,5722,6011,6597,6718,6792,7074,7120,7141,7388,7414,7876,7886,7917,7976,8286,8288,8877,9583,9849,10473,10566,11056,11577,11590,11633,11953,12009,12208,12223,12602,12655,13347,13397,13593,13599,13717,13792,13881,13947,14212,15252,15425,15614,16379,17034,17368,17707,18077,182…	CADM1,DUSP6,GABRR1,GPR37L1,LPHN1,MFGE8,NTRK2,ODC1,PRKCI,SCG2	CADM1,CSF3,DUSP6,EGR1,EGR2,EGR4,ELK1,GABRR1,GAD1,GIT1,GPR37L1,GRB2,IL16,LDHA,LPHN1,MAGED1,MAP2K2,MAPK1,MFGE8,NPTX2,NPY,NRTN,NTRK2,ODC1,PCK1,PRKCI,SCG2,SLC6A1,UBE2B,VGF
MSigDB Perturbation	WILCOX_PRESPONSE_TO_ROGESTERONE_UP	Genes up-regulated in primary cultures of ovarian surface epithlium cells exposed to progesterone [PubChem=5994] for 5 days.	281	0.00312505	1	0.0374116	1.47488	37.2912	55	1138	0.0240385	0.0483304	30	148	148	148,166,228,275,277,333,350,386,396,403,429,459,471,482,493,560,581,709,1000,1003,1116,1121,1142,1180,1202,1213,1219,1290,1300,1389,1432,1496,1505,1629,1633,1794,1809,1976,1991,2151,2157,2189,2225,2230,2245,2250,2266,2342,2390,2454,2462,2552,2570,2598,2642	148,166,228,275,277,333,350,386,396,403,429,459,471,482,493,560,581,709,1000,1003,1116,1121,1142,1180,1202,1213,1219,1290,1300,1389,1432,1496,1505,1629,1633,1755,1794,1809,1818,1841,1976,1991,2151,2154,2157,2189,2225,2230,2245,2250,2266,2332,2342,2364,2390,2454,2457,2462,2552,2570,2598,2642,2778,2879,2955,3114,3157,3231,3341,3416,3450,3487,3540,3712,3771,3819,4016,4067,4158,4218,4435,4477,4610,46…	ADAMTS20,ARHGEF3,CCNB1,CDKN2AIP,EIF1,ETV1,EVI2A,FDFT1,GALK2,GPR126,HMGCS1,HMGN3,IDH1,IFNAR2,KIF20A,KLF5,KLF6,LIPG,MAP7,METTL7A,MLF1IP,MON2,MTF2,PDS5A,PLA2G4A,PTHLH,SEC14L1,SUMO1,THBD,TRPC4	ABCG1,ACAT2,ACKR4,ADAMTS20,AREG,AREGB,ARHGEF3,ASPM,ATG2B,BBS10,BBS7,C10orf10,CCNB1,CCNB2,CDC20,CDC6,CDK1,CDKN2AIP,CDKN2C,CENPF,CENPN,CENPQ,CEP55,CEP57,CEP76,CNTN6,CXCL5,CYB5B,CYP51A1,DHCR7,DLGAP5,DLX4,DNAAF2,DNAJB9,EBP,EIF1,ELOVL6,ENSG00000256825,ETV1,EVI2A,FADS1,FADS2,FANCI,FAXDC2,FDFT1,FDPS,GALK2,GK,GPR126,HAND2,HBB,HBD,HBP1,HBS1L,HJURP,HMGB2,HMGCR,HMGCS1,HMGN3,HMMR,HMOX1,HSD17B11,IDH1,IDI1,IFN…
MSigDB Perturbation	TURASHVILI_BREAST_DUCTAL_CARCINOMA_VS_DUCTAL_NORMAL_DN	Genes down-regulated in ductal carcinoma vs normal ductal breast cells.	282	0.00316236	1	0.0377241	1.42038	46.4665	66	1418	0.0288462	0.0465444	37	170	178	33,81,98,117,158,195,205,208,219,244,308,325,383,386,399,470,482,485,555,570,581,591,604,659,675,703,739,764,866,1033,1055,1103,1153,1237,1352,1362,1371,1432,1505,1508,1529,1566,1629,1633,1690,1700,1785,1929,1986,2011,2081,2091,2146,2283,2342,2370,2386,2481,2497,2554,2570,2604,2609,2637,2687,2707	33,81,98,117,158,195,205,208,219,244,308,325,383,386,399,470,482,485,555,570,581,591,604,659,665,675,688,703,724,739,745,764,866,1033,1055,1103,1153,1237,1252,1313,1352,1362,1371,1432,1474,1505,1508,1529,1538,1566,1629,1633,1678,1690,1700,1785,1929,1986,2011,2081,2091,2140,2146,2283,2342,2370,2386,2481,2497,2554,2570,2604,2609,2617,2637,2658,2687,2707,2818,2869,2927,2966,2974,3001,3048,3228,3276,…	ANPEP,ATF3,BBOX1,BCOR,CLDN11,CP,DSC3,ELF3,FZD7,GABRP,GRAMD3,HOXA3,ITGB8,KRT17,LAMA3,LTF,MAFF,MAMDC2,MET,MMP7,NCOA7,PAPLN,PI15,PLEKHS1,RAPGEF2,RARRES1,RBPMS,RCAN1,RND3,SCN4B,SEC14L1,SFRP1,SOX9,ST3GAL6,SYNPO2,TGFA,ZNF462	ACTA2,ACTG2,ADAMTS5,AK5,ALDH1A3,ANPEP,ANXA1,APOD,ARMCX4,ATF3,ATP10D,ATP1A2,BBOX1,BCOR,BHLHE41,C10orf10,C2orf40,C8orf4,CAV2,CCL28,CD59,CDC14B,CDH3,CFD,CFI,CHI3L1,CHIC2,CHL1,CLDN11,CLDN8,CMTM8,CMYA5,CNN1,COL17A1,CP,CRYAB,CSNK1A1,CTSV,CX3CL1,CYB5R2,DLG5,DSC3,DSG3,DST,DUSP1,EDN3,EGFR,EGR1,EHF,ELF3,ELF5,FAM110C,FAM189A2,FBXO32,FHOD3,FOS,FOSB,FZD7,GABRE,GABRP,GATM,GPC3,GPM6B,GRAMD3,HMGCS2,HOXA3,ID4,IGJ…
MSigDB Perturbation	PHONG_TNF_RESPONSE_NOT_VIA_P38	Genes whose expression changes in Calu-6 cells (lung cancer) by TNF [GeneID=7124] were not affected by p38 inhibitor LY479754.	283	0.00317861	1	0.0377838	1.25089	119.115	149	3635	0.0651224	0.0409904	84	329	333	2,3,15,26,31,33,45,72,76,80,96,105,107,113,119,128,136,145,148,153,160,174,180,194,210,212,244,250,270,306,326,332,347,367,371,403,411,419,420,429,446,453,457,461,493,538,543,552,565,586,625,658,662,667,695,721,722,733,742,783,825,891,921,978,987,1013,1067,1069,1081,1102,1118,1120,1130,1142,1159,1163,1170,1180,1206,1219,1241,1242,1248,1263,1274,1327,1352,1389,1403,1412,1421,1450,1452,1481,1486,15…	2,3,15,26,31,33,45,72,76,80,96,105,107,113,119,128,136,145,148,153,160,174,180,194,210,212,244,250,254,270,306,326,332,347,367,371,403,411,419,420,429,446,453,457,461,493,538,543,552,565,586,625,658,662,667,695,710,721,722,733,742,783,825,862,891,921,932,978,987,1013,1067,1069,1081,1087,1102,1117,1118,1120,1130,1142,1159,1163,1170,1180,1203,1206,1219,1235,1241,1242,1248,1252,1263,1274,1327,1352,1…	ABR,ADAMTS9,ADARB1,AMPD3,APBA3,B4GALT5,BHLHE40,C9orf3,CADM1,CD83,CD97,CDC42EP3,CEBPB,CREB3,CSF1,CUL4B,CYB561,DENND5A,DHRS2,DRAM1,DSE,ETV1,FNBP1,FOXF1,GADD45A,GCH1,GRK5,GSAP,HIVEP2,IER2,IFNAR2,IKBKE,IL6ST,INPP4B,IRF1,IRF2,JAK1,KLF6,LIMD2,LOXL2,MAP3K3,MDFI,MEIS2,MYH9,NAB1,NR2F1,NRP2,PARP12,PDLIM5,PIK3CD,PLEKHA5,PLXNA1,PPAP2B,PPIF,PROX1,PTGES,RAI14,RAPGEF2,RBM47,RCAN1,RGS3,RHBDF2,RHOBTB3,RIPK2,SEL1L…	ABCA1,ABCD3,ABLIM3,ABR,ABTB2,ADAMTS9,ADARB1,AIM1,AMOTL2,AMPD3,ANKLE2,APBA3,ARHGEF40,ARID5B,ARNTL2,ARRB1,ARSJ,ATF5,ATP1B1,B4GALT5,BAMBI,BCL2A1,BCL3,BHLHE40,BHLHE41,BID,BIRC3,BMP5,C1QTNF1,C2CD2,C9orf3,CA12,CADM1,CALD1,CARS,CCDC28B,CD47,CD58,CD70,CD83,CD97,CDC42EP3,CDCP1,CDKN1B,CEBPB,CFLAR,CLDN1,CLIP2,CLK4,CNOT2,COL6A1,COL6A2,CREB3,CRELD2,CROT,CSF1,CSF2,CSNK1G2,CUL4B,CX3CL1,CXADR,CXCL10,CYB561,CYLD,…
[truncated: 227 more rows]
