# Supplementary material for: Superenhancer Analysis Defines Novel Epigenomic Subtypes of Non-APL AML, Including an RARα Dependency Targetable by SY-1425, a Potent and Selective RARα Agonist
Source: Oxford University Press journal article supplement (doi:10.1158/2159-8290.cd-17-0399), 2017-07-20
Supplement: 21598290cd170399-sup-181878_2_supp_4135422_7sdnjw.xlsx [file 21598290cd170399-sup-181878_2_supp_4135422_7sdnjw.xlsx]

## Sheet: Supp Table 4
Supplementary Table S4: Enhancer, mRNA, and SY-1425 EC50 in AML cell lines
Cell Line	RARA Enhancer	RARα mRNA	SY-1425 sensitivity
MV4-11	3.23	5.64	0.17
AML2	0.86	4.57	0.34
AML3	2.47	4.87	0.34
SigM5	1.65		0.46
Nomo-1	0.47	3.8	0.48
EOL-1	1.42	4.95	0.89
THP1	1.66		0.95
PL21	0.91	3.6	1.41
HL60	0.86	4.16	1.64
HEL	0.97	5.31	>2000
Kasumi-1	0.74	3.15	>2000
KG-1a	0.37	3.45	>2000
OCI-M1	1.14	3.32	>2000
