# Supplementary material for: Superenhancer Analysis Defines Novel Epigenomic Subtypes of Non-APL AML, Including an RARα Dependency Targetable by SY-1425, a Potent and Selective RARα Agonist
Source: Oxford University Press journal article supplement (doi:10.1158/2159-8290.cd-17-0399), 2017-07-20
Supplement: 21598290cd170399-sup-181878_2_supp_4135423_psdnjx.xlsx [file 21598290cd170399-sup-181878_2_supp_4135423_psdnjx.xlsx]

## Sheet: Supp Table S3
Supplementary Table S3: Median survival in TCGA data by predicted cluster
	n	events	median	0.95LCL	0.95UCL	20 Month Survival	20 Month Survival .95 LCL	20 Month Survival 0.95UCL
tcga.clust.preds=1&2	90	64	365	274	580	0.38	0.27	0.48
tcga.clust.preds=3	15	7	854	577	NA	0.69	0.36	0.87
tcga.clust.preds=4	17	14	275	153	915	0.15	0.02	0.37
tcga.clust.preds=5	34	17	792	489	NA	0.54	0.34	0.71
tcga.clust.preds=6	12	3	NA	792	NA	0.83	0.46	0.96
