# Supplementary material for: Superenhancer Analysis Defines Novel Epigenomic Subtypes of Non-APL AML, Including an RARα Dependency Targetable by SY-1425, a Potent and Selective RARα Agonist
Source: Oxford University Press journal article supplement (doi:10.1158/2159-8290.cd-17-0399), 2017-07-20
Supplement: 21598290cd170399-sup-181878_2_supp_4135425_csdnjx.xlsx [file 21598290cd170399-sup-181878_2_supp_4135425_csdnjx.xlsx]

## Sheet: Supp Table S2
Supplementary Table S2: RNA-seq signature and per-cluster weights
	id	name	1&2-score	3-score	4-score	5-score	6-score
1	uc003aca.1	MYO18B|84700	0	0.785	0	0	0
2	uc003abz.1	MYO18B|84700	0	0.7561	0	0	0
3	uc001bar.2	ARHGEF10L|55160	0.6785	0	-0.0095	0	0
4	uc001frr.2	CD1D|912	0.6696	0	0	0	-0.13
5	uc010gvb.1	MYO18B|84700	0	0.6118	0	0	0
6	uc001hgw.1	CD34|947	0	0	0	0.0632	-0.5935
7	uc002fwi.2	P2RX5|5026	0	0.5911	0	0.2129	0
8	uc002gbh.2	C17orf87|388325	0.5741	0	0	0	-0.2231
9	uc002qgp.2	LILRB4|11006	0.5538	0	0	0	-0.0205
10	uc002ohq.2	PPP1R14A|94274	0	0	0	0.5422	0
11	uc001rye.1	SMAGP|57228	0	0	0	0.5275	0
12	uc009zhg.1	CLEC7A|64581	0.525	0	0	0	-0.0036
13	uc002pvu.2	SIGLEC9|27180	0.5061	0	-0.0682	0	0
14	uc011ebo.1	GJA1|2697	0	0	0	0.4956	0
15	uc002cwu.2	C16orf5|29965	-0.0993	0	0.4947	0	0
16	uc009wst.1	CD1D|912	0.4901	0	-0.0551	0	0
17	uc002ehs.2	FTO|79068	0	0	0	0	0.4836
18	uc001sgl.3	KIAA0748|9840	-0.4821	0	0	0	0
19	uc002qgq.2	LILRB4|11006	0.4707	0	0	0	-0.0222
20	uc003mun.2	SERPINB6|5269	0.0823	0	0	0	-0.4704
21	uc001qar.2	NRGN|4900	0.4626	0	-0.0734	0.1571	-0.1667
22	uc001npf.2	MS4A7|58475	0.4617	0	0	0	0
23	uc003lgi.1	CD14|929	0.4472	0	-0.0756	0	0
24	uc010xco.1	SLC14A1|6563	0	0.4429	0	0	0
25	uc001npd.2	MS4A6E|245802	0.4369	0	0	0	0
26	uc002geq.3	ASGR2|433	0.4192	0	0	0	0
27	uc002lqc.2	CFD|1675	0	-0.4181	0	0	0
28	uc001qxk.1	CLEC7A|64581	0.4156	0	0	0	0
29	uc002sdt.2	MEIS1|4211	0	-0.4117	0	0	0
30	uc004cve.2	TLR8|51311	0.4087	0	-0.0175	0	0
31	uc001qtz.1	CLEC4A|50856	0.4086	0	0	0	0
32	uc003sys.2	HOXA7|3204	0	-0.4064	0	0	0
33	uc001nnu.3	MPEG1|219972	0.4061	0	-0.0383	0	0
34	uc002qgr.2	LILRB4|11006	0.4046	0	0	0	0
35	uc004fby.2	SLITRK4|139065	0	-0.4043	0	0	0
36	uc003muk.2	SERPINB6|5269	0	0	0	0	-0.4038
37	uc002djg.1	IGSF6|10261	0.4026	0	0	0	0
38	uc002pof.1	FCGRT|2217	0.3989	0	-0.2094	0	0
39	uc001lwn.2	KCNQ1|3784	0.2809	-0.3987	0	0	0
40	uc001vln.2	SLITRK5|26050	0	0	0	0.3889	0
41	uc001klh.3	ENTPD1|953	0.3841	0	0	0	0
42	uc003syt.2	HOXA9|3205	0	-0.3839	0.0175	0	0
43	uc002wfi.2	SIRPD|128646	0.3794	0	0	0	0
44	uc010rlb.1	MS4A6A|64231	0.377	0	-0.0696	0	0
45	uc001aka.2	FLJ42875|440556	0	0	0.3751	0	0
46	uc002qch.3	NLRP12|91662	0.3653	0	0	0	0
47	uc002sdu.2	MEIS1|4211	0	-0.364	0	0	0
48	uc010gai.2	SIRPB1|10326	0.3637	0	-0.0843	0	0
49	uc002dah.2	CIITA|4261	0	0	0	0	-0.3621
50	uc003kij.3	VCAN|1462	0.3599	0	-0.1246	0	0
51	uc003dqr.2	HTR1F|3355	0	0	0	0	-0.3599
52	uc010dbf.2	HOXB3|3213	0	0	0.3571	-0.028	0
53	uc002poj.2	RCN3|57333	0.3563	0	-0.1979	0	0
54	uc010ers.1	LILRB4|11006	0.3519	0	0	0	0
55	uc001etl.3	MTMR11|10903	0.3516	0	0	0	0
56	uc011kfn.1	NCF1C|654817	0.3479	-0.0431	0	0	0
57	uc001rcc.1	PLBD1|79887	0.3452	0	-0.1296	0	0
58	uc010aeu.1	KCTD12|115207	0.3446	0	0	0	-0.1058
59	uc010qok.1	ENTPD1|953	-0.3439	0	0	0	0
60	uc002rqo.2	CYP1B1|1545	0.3384	0	0	0	0
61	uc002qee.1	LILRB3|11025	0.3382	0	0	0	0
62	uc003idv.3	ANXA5|308	0.3378	0	-0.0586	0	0
63	uc001nqm.2	TMEM132A|54972	0.3378	0	0	0	0
64	uc001suw.2	LYZ|4069	0.3357	0	-0.011	0	0
65	uc011aqv.1	LOC100271722|100271722	0	-0.3321	0	0	0
66	uc002tjb.2	IL1RN|3557	0.3318	0	0	0	0
67	uc003ata.2	LGALS2|3957	0.3266	0	0	0	0
68	uc001jxg.2	ZNF503|84858	0.0442	-0.3264	0	0	0
69	uc001snd.2	LRP1|4035	0.3262	0	-0.1927	0	0
70	uc011cad.1	HOPX|84525	0	0	0	0.3254	-0.0627
71	uc002hzo.2	PTRF|284119	0	0	0	0.3252	-0.0735
72	uc004aph.2	CTSL1|1514	0.3247	0	-0.2487	0	0
73	uc001bck.1	NBL1|4681	0	0	0	0.3233	0
74	uc010bup.1	CIITA|4261	0	0	0	0	-0.3232
75	uc002wnw.2	JAG1|182	0	-0.3194	0	0	0
76	uc002jlb.1	CD300E|342510	0.318	0	-0.2146	0	0
77	uc001kle.1	ENTPD1|953	0.3171	0	0	0	0
78	uc010yfv.1	TMEM150B|284417	0.3168	0	0	0	0
79	uc011bjp.1	CD86|942	0.3152	0	0	0	0
80	uc001syl.1	CSRP2|1466	-0.093	0.3141	0	0	0
81	uc002lzh.2	ZBTB7A|51341	0	-0.3137	0	0	0
82	uc003bmd.3	TYMP|1890	0.3126	0	-0.0159	0	0
83	uc002poe.2	FCGRT|2217	0.3121	0	0	0	0
84	uc002wus.1	ABHD12|26090	0	0	0	0	-0.3113
85	uc002pru.1	KCNC3|3748	0.3105	0	0	0	0
86	uc001not.2	MS4A6A|64231	0.3088	0	0	0	0
87	uc004auw.3	FBP1|2203	0.3084	0	0	0	0
88	uc001bmk.2	DHDDS|79947	0	0	0	0.3084	0
89	uc002sxt.1	ANKRD36|375248	0	-0.3063	0	0	0
90	uc003mhh.3	DOK3|79930	0	0	0	0	-0.3036
91	uc011bup.1	FAM157A|728262	0.3032	0	0	0	0
92	uc001hgx.1	CD34|947	0	0	0	0.1339	-0.3031
93	uc010nzg.1	FLJ42875|440556	0	0	0.3012	0	0
94	uc001ces.1	MYCL1|4610	0.2995	0	0	0	0
95	uc010nvn.2	IL9R|3581	0	0.2987	0	0	0
96	uc003hst.2	MMRN1|22915	0	0	0	0	-0.2974
97	uc001bdk.2	CDA|978	0.2967	0	0	0	0
98	uc003mfa.2	HK3|3101	0.2965	0	0	0	0
99	uc002ecd.1	TGFB1I1|7041	0	0	0	0.2946	0
100	uc003eyv.2	P2RY13|53829	0.2945	0	0	0	-0.0232
101	uc011dve.1	PTK7|5754	-0.293	0	0	0	0
102	uc003asz.3	CDC42EP1|11135	0.2927	0	0	0	0
103	uc001noq.2	MS4A6A|64231	0.2913	0	0	0	0
104	uc010ejk.1	ZNF229|7772	0	0	0	0.2909	0
105	uc002blt.1	AKAP13|11214	0.2907	0	0	0	0
106	uc001vpq.3	KDELC1|79070	-0.2886	0	0	0	0
107	uc001qxn.2	CLEC7A|64581	0.2882	0	0	0	0
108	uc010tya.1	TNFAIP2|7127	0	-0.2881	0	0	0
109	uc003heq.1	CSN1S1|1446	0	0.2875	0	0	0
110	uc002xji.2	MAFB|9935	0.2854	0	0	0	0
111	uc002zxd.2	IGLL1|3543	-0.2853	0	0	0	0
112	uc002pes.2	PNMAL2|57469	0	0	0	0.2851	0
113	uc002pvv.1	SIGLEC7|27036	0.2828	0	0	0	0
114	uc002qiv.2	EPS8L1|54869	0	0	0	0.2824	0
115	uc003ctp.1	SHISA5|51246	0.2823	0	0	0	0
116	uc003gvp.2	UCHL1|7345	0	0	0	0.2811	0
117	uc010kxf.2	AOAH|313	0.2805	0	0	0	0
118	uc003jlt.2	FYB|2533	0.2795	0	0	0	-0.0138
119	uc001sfw.1	ZNF385A|25946	0.2758	0	0	0	-0.0645
120	uc003dhf.2	CACNA2D3|55799	0.273	0	0	0	0
121	uc002yhy.2	RGS19|10287	0	0	0	0	-0.2724
122	uc011dtu.1	FGD2|221472	0.2721	0	0	0	0
123	uc002zge.2	ITGB2|3689	0.0282	0	0	0	-0.2719
124	uc009wsr.1	CD1D|912	0.2689	0	0	0	0
125	uc010jwp.1	FGD2|221472	0.2681	0	0	0	0
126	uc002mnu.3	ICAM5|7087	0	0	0	0.2671	0
127	uc001pgn.2	KIAA1377|57562	0	0	0	-0.2671	0
128	uc011cpu.1	SEPP1|6414	-0.2644	0	0.0294	0	0.2022
129	uc002inu.2	uc002inu.2	0	-0.0525	0.2628	0	0
130	uc003gvc.2	RBM47|54502	0.2627	0	0	0	0
131	uc010xjt.1	FCER2|2208	0.262	0	0	0	0
132	uc002lky.1	NETO1|81832	0	0	0	0	0.2619
133	uc004cfi.2	FCN1|2219	0.2619	0	-0.0546	0	0
134	uc001leg.2	RGS10|6001	0	0	0	0	-0.2616
135	uc002eil.2	CES1|1066	0.2616	0	0	0	0
136	uc001rls.1	CPNE8|144402	0	-0.2615	0	0	0
137	uc002ydb.1	SLCO4A1|28231	0	0	0	0	-0.2613
138	uc011dbe.1	ARAP3|64411	0.2593	0	0	0	0
139	uc004cig.2	EGFL7|51162	0	0	0	0.2581	0
140	uc003ong.2	FGD2|221472	0.258	0	0	0	-0.0058
141	uc001fbs.2	S100A8|6279	0.2565	0	-0.0827	0	0
142	uc002prt.1	KCNC3|3748	0.2552	0	0	0	0
143	uc003tzs.2	ELN|2006	0	0	0	0.255	0
144	uc003onj.1	FGD2|221472	0.2545	0	0	0	0
145	uc003itu.2	HPGD|3248	0	0	0	0.2543	0
146	uc001kpt.2	uc001kpt.2	-0.0537	-0.0054	0.2537	0	0.0387
147	uc010fvr.2	SLC11A1|6556	0.2536	0	0	0	0
148	uc004bji.1	TNFSF8|944	0	0	0	0	-0.2532
149	uc001xlz.2	SLC8A3|6547	0	0	0.2513	0	0
150	uc010yev.1	LILRA5|353514	0.2505	0	0	0	0
151	uc010cbk.1	NOD2|64127	0.2498	0	0	0	0
152	uc003xry.2	LYPLA1|10434	0	0	0	0	-0.2483
153	uc010vtk.1	ASGR2|433	0.2483	0	-0.1368	0	0
154	uc010gva.1	MYO18B|84700	0	0.2471	0	0	0
155	uc003cph.1	CCR1|1230	0.2466	0	0	0	0
156	uc002ttb.2	CCDC74A|90557	0	0	0.2463	0	0
157	uc002int.1	HOXB6|3216	0	0	0.2454	0	0
158	uc002cxa.2	MGRN1|23295	0	0	0	0	-0.245
159	uc010rrg.1	FCHSD2|9873	0	0	0	0.2436	0
160	uc001apo.2	SLC2A5|6518	0	0	0.2436	0	-0.0653
161	uc002inm.2	HOXB2|3212	0	-0.2433	0.0075	0	0
162	uc003yhv.1	SDC2|6383	0.2426	0	0	0	0
163	uc002aez.2	AQP9|366	0.2422	0	0	0	0
164	uc001qry.1	ATN1|1822	0	-0.2407	0	0	0
165	uc001jxi.2	C10orf11|83938	0	-0.2395	0	0	0
166	uc003frp.3	BCL6|604	0.239	0	0	0	0
167	uc010yhs.1	ZSCAN18|65982	-0.239	0	0	0	0
168	uc002vei.2	IKZF2|22807	0	0	0	0.239	0
169	uc009zfd.1	GPR162|27239	0	-0.2389	0	0	0
170	uc003bzc.2	FGD5|152273	0	0	0	0.2385	0
171	uc001bfy.2	C1QA|712	0.2368	0	0	0	0
172	uc003cpm.3	CCR2|729230	0.236	0	-0.1221	0	0
173	uc010ybk.1	uc010ybk.1	0.2359	0	0	0	0
174	uc003mna.2	TRIM7|81786	0.2355	0	0	0	0
175	uc001wds.1	uc001wds.1	-0.2352	0	0	0	0
176	uc011avb.1	FBLN2|2199	0	0	0	0.2348	0
177	uc001wgt.3	SLC7A7|9056	0.2346	0	-0.04	0	0
178	uc011agt.1	CLTCL1|8218	0.2345	0	0	0	0
179	uc010yjr.1	MYCN|4613	-0.2335	0	0	0	0
180	uc001rda.1	PTPRO|5800	0.2334	0	0	0	0
181	uc001bok.2	FGR|2268	0.233	0	0	0	0
182	uc001npe.2	MS4A7|58475	0.2318	0	0	0	0
183	uc001lhm.2	CHST15|51363	0.2312	0	0	0	0
184	uc001qta.3	CD163|9332	0.2304	0	0	0	0
185	uc003kih.3	VCAN|1462	0.2304	0	0	0	0
186	uc003keq.3	S100Z|170591	0	0	0	0	-0.2303
187	uc002cwz.2	MGRN1|23295	0	0	0	0	-0.23
188	uc010bkn.2	NRG4|145957	0	0	0.2297	0	0
189	uc002lkw.2	NETO1|81832	0	0	0	0	0.2289
190	uc001wdt.1	uc001wdt.1	-0.2281	0	0	0	0
191	uc004eye.1	uc004eye.1	0	-0.2278	0	0	0
192	uc010fvp.1	SLC11A1|6556	0.2268	0	0	0	0
193	uc001lwy.2	SLC22A18|5002	0	-0.2259	0	0	0
194	uc002qrg.2	ZNF135|7694	0	0	0	0.2259	0
195	uc001bom.2	FGR|2268	0.2259	0	0	0	-0.0256
196	uc011cpv.1	SEPP1|6414	-0.2255	0	0.1139	0	0.058
197	uc003gve.2	RBM47|54502	0.2255	0	0	0	0
198	uc001fqi.1	NTRK1|4914	0	0	0	0.2253	0
199	uc011dqp.1	HLA-DPB1|3115	0	0	0	0	-0.2251
200	uc010gpa.1	UMODL1|89766	-0.0269	0.2249	0	0	0
201	uc011mkg.1	CYBB|1536	0.2239	0	-0.0443	0	0
202	uc002ksa.2	C18orf1|753	0	0	0	0	-0.2231
203	uc001fbq.2	S100A9|6280	0.223	0	-0.0088	0	0
204	uc003qug.2	QKI|9444	0.2216	0	0	0	0
205	uc010juk.2	HLA-DPA1|3113	0	0	0	0	-0.2211
206	uc010sre.1	LRP1|4035	0.2208	0	0	0	0
207	uc002syd.1	ZAP70|7535	-0.2206	0	0	0	0
208	uc003kil.3	VCAN|1462	0.2206	0	0	0	0
209	uc001qav.3	ESAM|90952	0	0	0	0.2203	0
210	uc011jzm.1	HOXA10|3206	0	-0.2197	0	0	0
211	uc002pwo.2	SIGLEC10|89790	0.2184	0	0	0	-0.0281
212	uc001baf.2	PADI2|11240	0.2183	0	0	0	0
213	uc001sup.2	CPM|1368	0.218	0	0	0	0
214	uc011arz.1	TYMP|1890	0.2179	0	-0.0283	0	0
215	uc010hpy.1	CD96|10225	0	0	0.2175	0	-0.0138
216	uc003obp.3	HLA-DRB1|3123	0	0	0	0	-0.2156
217	uc001idb.3	C1orf150|148823	-0.2143	0	0.0002	0	0
218	uc003gvq.2	UCHL1|7345	0	0	0	0.2141	0
219	uc003mum.2	SERPINB6|5269	0	0	0	0	-0.214
220	uc003pyr.2	GJA1|2697	0	0	0	0.2127	0
221	uc001fsz.1	MNDA|4332	0.2098	0	-0.0874	0	0
222	uc002keo.2	SECTM1|6398	0.2096	0	-0.0511	0	0
223	uc003uoa.2	PDK4|5166	0.2095	0	0	0	0
224	uc002jkx.2	CD300LB|124599	0.2087	-0.0603	0	0	0
225	uc010ocs.1	ARHGEF10L|55160	0.2083	0	0	0	0
226	uc001frt.2	CD1A|909	0.2078	0	0	0	0
227	uc003xfz.1	CLU|1191	0	-0.2078	0	0	0
228	uc002pxq.2	FPR1|2357	0.2075	0	-0.0761	0	0
229	uc002fji.2	IRF8|3394	0.2063	0	0	0	0
230	uc001nek.2	NR1H3|10062	-0.2061	0	0	0	0
231	uc003maq.1	KCNMB1|3779	0.0188	0	0	0	-0.2056
232	uc002qiz.3	TNNT1|7138	0.2054	0	0	0	0
233	uc004bdh.2	KLF4|9314	0.2053	-0.048	0	0	0
234	uc002ehv.2	IRX5|10265	-0.1104	0	0	0	0.2052
235	uc001kps.1	uc001kps.1	0	0	0.2047	0	0
236	uc001teh.2	USP44|84101	0	0	0	0	0.2046
237	uc002luu.2	MOBKL2A|126308	0.026	0	-0.2045	0	0
238	uc003frm.2	RTP4|64108	0	0	0	0	-0.2038
239	uc003ayp.3	ADSL|158	0	0	0	0	-0.2029
240	uc010iwj.1	PDE4D|5144	0.2025	0	0	0	0
241	uc002qjf.2	TNNT1|7138	0.2025	0	0	0	0
242	uc010zkc.1	SLC11A1|6556	0.2025	0	0	0	0
243	uc003syn.1	HOXA5|3202	0	-0.2021	0.044	0	0
244	uc003syq.1	HOXA6|3203	0	-0.2019	0	0	0
245	uc001ypx.2	AHNAK2|113146	0	0	0	0	-0.2017
246	uc003jog.1	FGF10|2255	0	0	0	0	0.2016
247	uc001boi.2	FGR|2268	0.2011	0	0	0	-0.0832
248	uc003ooo.2	KCNK17|89822	-0.1999	0	0	0	0
249	uc010yzw.1	CCDC74B|91409	0	0	0.1985	0	0
250	uc002lpl.1	PRSSL1|400668	-0.1976	0	0	0	0
251	uc003zvz.2	VCP|7415	0	0	0	0	-0.1976
252	uc010eoq.1	SIGLEC7|27036	0.1964	0	0	0	0
253	uc002xsu.1	ZMYND8|23613	0	0.1963	0	0	0
254	uc001tuj.2	OAS2|4939	0	0	0	0	-0.1962
255	uc001teg.2	USP44|84101	0	0	0	0	0.1959
256	uc002qej.1	LILRB3|11025	0.1953	0	-0.0398	0	0
257	uc003mul.2	SERPINB6|5269	0	0	0	0	-0.1948
258	uc004bdf.1	KLF4|9314	0.1944	0	0	0	0
259	uc003ant.1	HMOX1|3162	0.1943	0	-0.0025	0	0
260	uc003lqh.2	AFAP1L1|134265	0	0	0	0.1938	0
261	uc003uuo.1	PILRA|29992	0.1936	0	-0.029	0	0
262	uc002zak.2	C21orf128|150147	-0.1935	0	0	0	0
263	uc011bys.1	RBM47|54502	0.1935	0	-0.0262	0	-0.0189
264	uc003ktc.1	SNCAIP|9627	0	0	0	0	0.1932
265	uc010erc.2	OSCAR|126014	0	0	0.0438	0	-0.1928
266	uc010wjd.1	ADAM11|4185	-0.1925	0	0.102	0	0
267	uc002hxv.2	FKBP10|60681	0	0	0	0.1925	0
268	uc001vyl.1	RNASE2|6036	0	-0.1921	0	0	0
269	uc009yut.1	MYO7A|4647	0.1914	0	0	0	0
270	uc002wja.2	SIGLEC1|6614	0.1913	0	0	0	0
271	uc010seb.1	ITFG2|55846	0	0	0	-0.1909	0
272	uc001qxf.2	CLEC7A|64581	0.1896	0	0	0	0
273	uc001tuh.2	OAS2|4939	0	0	0	0	-0.1891
274	uc001gqk.3	NCF2|4688	0.189	0	0	0	-0.1732
275	uc004cid.2	EGFL7|51162	0	0	0	0.0099	-0.1888
276	uc010bet.1	HDC|3067	0	0	-0.0956	0	0.1884
277	uc003cgb.2	ARPP21|10777	0	0.1884	0	0	0
278	uc003fuj.2	FAM43A|131583	0	-0.188	0	0	0
279	uc001htf.2	RHOU|58480	0.1878	0	0	0	0
280	uc003ewm.2	CPA3|1359	-0.1877	0	0	0	0.0223
281	uc010bll.1	CTSH|1512	0.1874	0	-0.0038	0	0
282	uc002niw.2	LRRC25|126364	0.1873	0	-0.0267	0	0
283	uc003xbw.3	SORBS3|10174	0	-0.1869	0	0	0
284	uc009yzw.1	AMICA1|120425	0.1867	0	0	0	0
285	uc003ugy.2	MAGI2|9863	0	-0.1864	0	0	0
286	uc002vxk.2	UBE2F|140739	0	0	0	0	-0.1859
287	uc010qrm.1	TCF7L2|6934	0	0	0	0.1855	0
288	uc010que.1	CHST15|51363	0.1854	0	0	0	0
289	uc001nqn.2	SLC15A3|51296	0.1847	0	0	0	0
290	uc003uup.1	PILRA|29992	0.1847	0	0	0	0
291	uc002uag.2	TANC1|85461	0	0	0	0.1838	0
292	uc010wku.1	NPEPPS|9520	0	0	0	0.1836	0
293	uc003pzr.2	RNF217|154214	0	-0.1834	0	0	0
294	uc001gap.2	HSPA6|3310	0.1829	0	0	0	0
295	uc011amo.1	APOL1|8542	0	0	0	0	0.1823
296	uc002hgl.2	EVI2A|2123	0.1822	0	0	0	0
297	uc003ocw.1	HLA-DPB2|3116	0	0	0	0	-0.1812
298	uc010dbh.1	HOXB6|3216	0	0	0.1807	0	0
299	uc002qgl.2	LILRB1|10859	0.1802	0	0	0	0
300	uc003cpn.3	CCR2|729230	0.1796	0	-0.0251	0	0
301	uc001omq.2	ACY3|91703	0	0	0	0	-0.1789
302	uc010rxm.1	IL10RA|3587	0.1787	0	-0.0553	0	0
303	uc010wsk.1	UNC13D|201294	0	0	0	0	-0.1777
304	uc002rci.2	MYCN|4613	-0.1775	0	0	0	0
305	uc001fnl.2	SEMA4A|64218	0	0	0	0	-0.1771
306	uc002yua.2	KCNE1|3753	0.1767	0	0	0	0
307	uc010ptq.1	ANGEL2|90806	0	0	0	0	0.1765
308	uc001tbm.2	LUM|4060	0	0	0	0	0.1765
309	uc010xhq.1	PIP5K1C|23396	0	0	0	0	-0.1763
310	uc003llh.2	RELL2|285613	0	0	0	0	-0.1761
311	uc001lem.2	BAG3|9531	0.1761	0	-0.0387	0.14	0
312	uc002ymf.2	ADAMTS1|9510	0	0	0	0	0.1749
313	uc001ymm.1	TNFAIP2|7127	0	-0.1749	0	0	0
314	uc011dnc.1	VARS2|57176	0	0.1746	0	0	0
315	uc010cca.1	IRX5|10265	0	0	0	0	0.1746
316	uc003qrz.2	TAGAP|117289	0	0	0	0	-0.1744
317	uc002qfc.2	LILRB2|10288	0.1742	0	0	0	0
318	uc004ahm.2	MAMDC2|256691	-0.174	0	0	0	0.077
319	uc003iha.2	PCDH10|57575	0	0.1735	0	0	0
320	uc002wut.1	ABHD12|26090	0	0	0	0	0.1732
321	uc002inn.2	HOXB3|3213	0	0	0.1731	0	0
322	uc001egb.3	SLC22A15|55356	0.173	0	-0.1289	0	0
323	uc009ymx.1	MS4A7|58475	0.1728	0	0	0	0
324	uc003omn.2	CDKN1A|1026	0.1727	0	0	0	0
325	uc003lwq.2	CYFIP2|26999	-0.1727	0	0	0	0
326	uc002viz.3	CYP27A1|1593	0.1725	0	0	0	0
327	uc003qcp.1	ARG1|383	0	0.1725	0	0	0
328	uc010hoc.2	EIF4E3|317649	0	0	0.1725	0	0
329	uc003ubb.2	NCF1|653361	0.1723	0	0	0	0
330	uc001fgt.1	ADAM15|8751	0	0	0	0.0556	-0.1718
331	uc003cvk.1	DALRD3|55152	0	0	0.1717	0	0
332	uc002zoh.3	DGCR6|8214	-0.0333	0	0.1712	0	0
333	uc011bsf.1	BCL6|604	0.1706	0	0	0	0
334	uc001hkk.1	PTPN14|5784	-0.1701	0	0	0	0
335	uc011jvq.1	SUN1|23353	0	0	0	0	0.1699
336	uc010dpn.2	NEDD4L|23327	0	0	0	-0.1696	0
337	uc003mey.2	UNC5A|90249	0.1696	0	0	0	0
338	uc003qdo.2	VNN1|8876	0	-0.1695	0	0	0
339	uc010ert.2	LILRB4|11006	0.1693	0	0	0	0
340	uc010clx.1	ASGR1|432	0.1687	0	0	0	-0.1036
341	uc004che.2	GPSM1|26086	-0.1686	0	0	0	0
342	uc001aoj.2	CAMTA1|23261	0	0	0	0.1685	0
343	uc010wqz.1	CD300LB|124599	0.1685	0	0	0	0
344	uc004ddr.2	CYBB|1536	0.1679	0	0	0	0
345	uc002bdd.2	IDH3A|3419	0	0	0	0	-0.167
346	uc003vjk.2	TSPAN12|23554	0	0	0	0	0.1664
347	uc001bkg.2	RHCE|6006	0	0.1663	0	0	0
348	uc002xgh.1	SAMHD1|25939	0.1655	0	0	0	0
349	uc003syo.1	HOXA6|3203	0	-0.1648	0.0453	0	0
350	uc009xwj.2	NKX2-3|159296	0	0	0.1647	0	0
351	uc002jxz.3	SGSH|6448	0.1646	0	0	0	0
352	uc003uhg.3	CD36|948	0.1644	0	0	0	0
353	uc002svq.2	TMEM127|55654	0	0	0	0.1639	0
354	uc002zrv.2	RTN4R|65078	-0.1634	0	0	0	0
355	uc001hxo.2	NID1|4811	0.1632	0	0	0	-0.038
356	uc003cop.1	LARS2|23395	0	0	0	0	-0.163
357	uc001aub.2	DHRS3|9249	0	0.1628	0	0	0
358	uc001jbt.2	RASSF4|83937	0.1622	0	0	0	0
359	uc010clv.1	CLEC10A|10462	0.162	0	0	0	0
360	uc011cmo.1	ADCY2|108	-0.0108	0	0	0	0.1619
361	uc010wcp.1	RDM1|201299	0	0.1616	0	0	0
362	uc011mpq.1	MED12|9968	-0.1614	0	0	0	0
363	uc010yep.1	LILRA6|79168	0.1606	0	0	0	0
364	uc002prw.2	NAPSB|256236	0.1602	0	0	0	0
365	uc003eex.2	CSTA|1475	0.1589	0	0	0	0
366	uc003nuq.2	LST1|7940	0	0	0.0184	0	-0.1589
367	uc011ecw.1	SGK1|6446	0.1585	0	0	0	0
368	uc001rmi.2	LRRK2|120892	0.1583	0	0	0	0
369	uc002oxf.1	PLAUR|5329	0	-0.1582	0	0	0
370	uc010qmw.1	LIPN|643418	0.1579	0	0	0	0
371	uc002wtr.1	CST5|1473	0.1572	0	0	0	0
372	uc010wpk.1	ACE|1636	0	0	0	0.1567	0
373	uc003frq.1	BCL6|604	0.1562	0	0	0	0
374	uc003ugb.2	FGL2|10875	0.156	0	0	0	0
375	uc002ros.2	LTBP1|4052	0	0	0	0	0.1556
376	uc001yuu.2	CYFIP1|23191	0	-0.1554	0	0	0
377	uc001jgs.2	ARHGAP22|58504	-0.0923	-0.1553	0.1408	0	0
378	uc010dbg.2	HOXB3|3213	0	0	0.155	0	0
379	uc003ekm.3	GATA2|2624	-0.1543	0	0	0	0
380	uc002nfb.2	CPAMD8|27151	0.1543	0	0	0	0
381	uc002tln.1	MARCO|8685	0.1536	0	-0.1107	0	0
382	uc001xbr.2	LGALS3|3958	0.1534	0	0	0	0
383	uc003mwy.1	LY86|9450	0.1534	0	0	0	-0.0485
384	uc009vwq.2	TIE1|7075	-0.1533	0	0	0	0
385	uc001bas.2	ARHGEF10L|55160	0.1531	0	0	0	0
386	uc002kuc.2	CABLES1|91768	-0.1531	0	0.0613	0	0
387	uc010ung.1	CTSH|1512	0.1529	0	0	0	0
388	uc002bfm.1	FAH|2184	-0.1526	0	0	0	0
389	uc001npi.2	MS4A14|84689	0.1525	0	0	0	0
390	uc002gek.2	CLEC10A|10462	0.1525	0	0	0	0
391	uc011byh.1	FAM114A1|92689	0.152	0	0	0	-0.1403
392	uc002cqd.1	CCNF|899	0	0	0	0.152	0
393	uc001xhk.3	HSPA2|3306	0	0	0	0.1513	0
394	uc010ioj.2	TBC1D9|23158	0.151	0	0	0	0
395	uc010fej.2	DYSF|8291	0	0	0.1507	0	0
396	uc002wjc.2	SIGLEC1|6614	0.1507	0	0	0	0
397	uc002dto.2	QPRT|23475	-0.1505	0	0	0	0
398	uc011kes.1	NCF1B|654816	0.1503	0	0	0	0
399	uc002fzc.2	PLD2|5338	0.1499	0	0	0	0
400	uc003bmb.3	TYMP|1890	0.1488	0	0	0	0
401	uc001bnj.3	TRNP1|388610	0.1487	0	0	0	0
402	uc010ezx.2	STRN|6801	0.1482	0	0	0	0
403	uc001bsw.1	uc001bsw.1	0	0.1482	0	0	0
404	uc003lsj.2	RPS14|6208	0	0	0	0	-0.1482
405	uc003kjk.2	MEF2C|4208	0	0	0	0	-0.1481
406	uc002tbe.2	MAP4K4|9448	0	0	0	0	-0.1469
407	uc010pne.1	ABL2|27	0	-0.1467	0	0	0
408	uc003ubv.2	NCF1C|654817	0.1466	0	0	0	0
409	uc001awn.2	CASP9|842	0	0	0.1465	0	0
410	uc002poi.2	FCGRT|2217	0.1464	0	0	0	0
411	uc002wak.2	SNED1|25992	0	0	0	0.1464	0
412	uc010zyd.1	SULF2|55959	0.1462	0	0	0	0
413	uc009zkp.2	RAPGEF3|10411	0	0	0	0.1462	0
414	uc004dxc.3	STARD8|9754	0	0	0	0	-0.1458
415	uc001gut.1	PTPRC|5788	0.0108	0	-0.1457	0	0
416	uc002nic.1	IFI30|10437	0.1445	0	0	0	0
417	uc002rql.2	FAM82A1|151393	0.1441	0	0	0	0
418	uc003fwz.3	SENP5|205564	0	0	0	0	-0.144
419	uc004ble.1	GSN|2934	0	0	0	0	-0.144
420	uc011crs.1	NAIP|4671	0.1438	0	0	0	0
421	uc010zdr.1	DCAF17|80067	0	0	0	0	-0.1437
422	uc010vtp.1	ACADVL|37	0	-0.1436	0	0	0
423	uc001ajb.1	MORN1|79906	-0.1434	0	0	0	0.0997
424	uc001fvk.2	PEA15|8682	0	0	0	0	-0.1433
425	uc002qja.3	TNNT1|7138	0.1432	0	0	0	0
426	uc002cun.1	MEFV|4210	0.1431	0	0	0	0
427	uc003ksw.1	SNCAIP|9627	0	0	0	0	0.143
428	uc010jgh.2	GNPDA1|10007	0	0	0	0	-0.1423
429	uc001oye.2	MYO7A|4647	0.1421	0	0	0	0
430	uc002fxm.3	CYB5D2|124936	0	0	0	-0.1412	0
431	uc001qhj.2	THYN1|29087	-0.1408	0	0	0	0
432	uc003lpp.1	SH3TC2|79628	0	0	0.1406	0	0
433	uc003fcv.1	SCHIP1|29970	0	0	0.1405	0	0
434	uc010unq.1	IL16|3603	0	0	0	0	-0.1402
435	uc001lmz.2	PAOX|196743	0	0	0	0.1401	0
436	uc003szn.2	JAZF1|221895	0.1399	0	0	0	0
437	uc001hnv.1	TLR5|7100	0.1398	0	0	0	0
438	uc003yzb.2	TSTA3|7264	0	0	0	0	-0.1397
439	uc001qas.2	VSIG2|23584	0.1397	0	0	0	0
440	uc003cst.2	PLXNB1|5364	0	0	0	0	0.1393
441	uc003nms.3	GABBR1|2550	0.1392	0	0	0	0
442	uc001ssg.3	GNS|2799	0	0	0	0	-0.1388
443	uc001etg.2	SV2A|9900	-0.1386	0	0.0265	0	0
444	uc003wxb.2	MSR1|4481	0.1378	0	0	0	0
445	uc001toq.2	UBE3B|89910	0	0	0	0	-0.1375
446	uc010shl.1	LRP6|4040	0	0	0	0.137	0
447	uc002jvz.1	USP36|57602	-0.137	0	0	0	0
448	uc011kut.1	LOC728743|728743	-0.1369	0	0	0	0
449	uc001mve.2	LMO2|4005	0	0	0	0	-0.1368
450	uc002utb.2	SDPR|8436	0	-0.1367	0	0	0
451	uc001gvm.2	CAMSAP1L1|23271	0.1367	0	0	0	0
452	uc002xvk.2	uc002xvk.2	0.1366	0	0	0	0
453	uc010zyr.1	uc010zyr.1	0.1365	0	0	0	0
454	uc002ycz.1	C20orf200|253868	0	0	0.1364	0	0
455	uc002mhk.1	TRAPPC5|126003	0	0	0	0	-0.1361
456	uc003tfv.2	uc003tfv.2	-0.1358	0	0	0	0.0678
457	uc002qlw.2	EPN1|29924	0	0	0	0	-0.1358
458	uc003hoy.2	AGPAT9|84803	0	0	0	0	-0.1356
459	uc004bso.1	ST6GALNAC6|30815	0	0	0.1354	0	0
460	uc011mbr.1	PPP2R4|5524	0	0	0	0	-0.1354
461	uc003oqf.1	TREM1|54210	0.1354	0	0	0	0
462	uc010ocr.1	ARHGEF10L|55160	0.1351	0	0	0	0
463	uc003dpb.1	uc003dpb.1	0.1351	0	0	0	0
464	uc010dfm.2	SDK2|54549	0	0	0	0.135	0
465	uc009xyy.1	SLC18A2|6571	0	0	0	0.1347	0
466	uc002kom.3	APCDD1|147495	0.1346	0	0	0	-0.0685
467	uc009yvx.2	NAALAD2|10003	0	0	0	0.1344	0
468	uc004egc.2	SYTL4|94121	0	0	0.1343	0	0
469	uc004bsb.2	SH2D3C|10044	0	0	0	0	-0.1343
470	uc010ihf.2	REST|5978	-0.1338	0	0	0	0
471	uc009wro.1	LMNA|4000	0	-0.1334	0	0	0
472	uc001qsx.1	ACSM4|341392	0	0	0	0	0.1334
473	uc001qat.2	VSIG2|23584	0.1329	0	0	0.1243	-0.0718
474	uc002pji.2	CYTH2|9266	0	0	0	0	0.1326
475	uc010hhb.2	OXSR1|9943	0	0	0	0	0.1325
476	uc003dhh.1	CACNA2D3|55799	0.1323	0	0	0	0
477	uc001rmg.3	LRRK2|120892	0.1321	0	0	0	0
478	uc010aig.2	NDRG2|57447	0	0	0	0.132	0
479	uc002bvc.1	LRRC28|123355	0	0.1318	0	0	0
480	uc010csi.2	LRRC37B2|147172	-0.1315	0	0	0	0
481	uc003cfz.2	ARPP21|10777	0	0.1315	0	0	0
482	uc010nzb.1	LOC115110|115110	0	0	-0.1312	0	0
483	uc001qxg.2	CLEC7A|64581	0.1312	0	0	0	0
484	uc003ocj.1	HLA-DMB|3109	0	0	0	0	-0.1311
485	uc001ngp.3	PTPRJ|5795	0.1311	0	0	0	0
486	uc002jxc.2	CBX2|84733	-0.1306	0	0	0	0
487	uc002ckd.2	RPUSD1|113000	0	0.13	0	0	0
488	uc001bdq.3	KIF17|57576	0	0	0	0	-0.1298
489	uc010ozy.1	LOC200030|200030	0	0	0	0.1298	0
490	uc001psk.2	AMICA1|120425	0.0294	0	0	0	-0.1296
491	uc010quq.1	PTPRE|5791	0	0	0	0	-0.1295
492	uc002sqt.1	POLR1A|25885	0	0	0	0	-0.1291
493	uc010wpj.1	ACE|1636	0	0	0	0.1288	0
494	uc003dna.3	SUCLG2|8801	0	-0.1285	0	0	0
495	uc001lul.2	LSP1|4046	0.0209	0	0	0	-0.128
496	uc002zmb.2	CECR6|27439	0.1278	0	0	0	0
497	uc002lfw.3	TCF4|6925	0	0	0.1278	0	0
498	uc003axv.3	MGAT3|4248	0	0.1277	0	0	0
499	uc001tui.1	OAS2|4939	0	0	0	0	-0.1277
500	uc010gbq.2	CRLS1|54675	0	0	-0.1277	0	0
501	uc003nus.2	LST1|7940	0.1274	0	0	0	0
502	uc002qeu.1	LILRA6|79168	0.1274	0	0	0	0
503	uc002tmu.3	GLI2|2736	0	0	0.127	0	0
504	uc003sip.2	FAM20C|56975	0.1269	0	0	0	0
505	uc002smp.1	LOXL3|84695	0.1259	0	0	0	0
506	uc001lhn.2	CHST15|51363	0.1258	0	0	0	0
507	uc003pck.2	FAM83B|222584	0	0	0	0.1257	0
508	uc011mfe.1	FAM157B|100132403	0.1253	0	0	0	0
509	uc003gyt.2	OCIAD2|132299	-0.1251	0	0	0	0
510	uc002qpn.2	ZNF134|7693	0	0	0	0	-0.1248
511	uc003kuu.2	FBN2|2201	0.1247	0	0	0	0
512	uc001pss.1	CD3D|915	0	0.1247	0	0	0
513	uc002hch.2	RAB34|83871	0	0	0.1247	0	0
514	uc002pgj.1	C5AR1|728	0.1246	0	0	0	0
515	uc002jnf.2	SUMO2|6613	0	0	0	0	-0.1246
516	uc001quo.1	CLEC4E|26253	0.1246	0	0	0	0
517	uc002jas.2	CYB561|1534	0	0	0	0.1245	0
518	uc002inw.2	HOXB8|3218	0	0	0	0	0.124
519	uc002jbf.2	MAP3K3|4215	0.1239	0	0	0	0
520	uc002jky.1	CD300C|10871	0.1237	0	0	0	0
521	uc010cef.2	PLEKHG4|25894	0	0	0	0.1235	0
522	uc003ysv.2	FAM49B|51571	0	0	0	0	-0.1231
523	uc003xtj.1	FAM110B|90362	0	0	0	0	0.1229
524	uc001jky.2	ANK3|288	0	0	0	0	0.1227
525	uc001uzm.3	TSC22D1|8848	-0.1223	0	0	0	0
526	uc010vgq.1	NOD2|64127	0.122	-0.0444	0	0	0
527	uc003llm.2	ARAP3|64411	0.0769	0	-0.0002	0.1218	0
528	uc010awo.1	TNFAIP2|7127	0	-0.1215	0	0	0
529	uc001drf.3	RWDD3|25950	0	0	0	0	0.1214
530	uc011ksk.1	uc011ksk.1	0	0.1213	0	0	0
531	uc004aqc.1	C9orf47|286223	0.1211	0	0	0	0
532	uc003uhb.1	GNAI1|2770	0	0	0	0	-0.1208
533	uc001qax.3	ESAM|90952	0	0	0	0.1207	0
534	uc001fbr.1	S100A12|6283	0.1206	0	0	0	0
535	uc010eat.1	uc010eat.1	0	0	0.0721	0	-0.1203
536	uc010wlk.1	HOXB3|3213	0	-0.1198	0	0	0
537	uc002ita.2	SPAG9|9043	0	0.1197	0	0	0
538	uc003qdt.2	VNN2|8875	0.1192	0	0	0	0
539	uc010dcl.2	SCPEP1|59342	0.1188	0	0	0	0
540	uc001qqv.1	CD4|920	0.1086	-0.1179	0	0	0
541	uc001ljt.2	DOCK1|1793	0	0	0.1178	0	0
542	uc009zpi.1	LRP1|4035	0.1176	0	0	0	0
543	uc010yer.1	LILRB5|10990	0.1173	0	0	0	0
544	uc001zun.2	DUOX2|50506	0	0	0	0.1172	0
545	uc010bea.2	DUOX2|50506	0	0	0	0.1172	0
546	uc003lsh.2	RPS14|6208	-0.1172	0	0	0	0
547	uc001fwy.1	LY9|4063	0	0.1171	0	0	0
548	uc003anb.2	TIMP3|7078	0	0	0	0.1171	0
549	uc003qvd.1	RPS6KA2|6196	0	0.1169	0	0	0
550	uc002wsw.1	uc002wsw.1	0	0	0	0	0.1167
551	uc003vqu.2	MKLN1|4289	0	0	0	0	0.1165
552	uc003cpo.3	CCR5|1234	0.1164	0	0	0	0
553	uc001jkv.2	ANK3|288	0	0	0	0	0.1163
554	uc001bol.2	FGR|2268	0.1159	0	0	0	0
555	uc001rch.3	H2AFJ|55766	0	0	0	0	-0.1154
556	uc001prw.2	IL10RA|3587	0.0709	0	-0.1152	0	0
557	uc009wmw.2	CGN|57530	0	0	0	0.1152	0
558	uc011dia.1	PPP1R3G|648791	0.1151	0	0	0	0
559	uc009zxk.2	WDR66|144406	-0.1151	0	0	0	0
560	uc010dkz.2	GNAL|2774	-0.1149	0	0	0	0
561	uc002tvl.2	KYNU|8942	0.1146	0	0	0	0
562	uc010wlz.1	FAM117A|81558	-0.1146	0	0	0	0
563	uc004cbd.2	RAPGEF1|2889	0	0	0	0	-0.1145
564	uc002obi.1	PSENEN|55851	0	0	0	0	-0.1142
565	uc002jft.1	CACNG4|27092	0	0	0.1139	0	0
566	uc002lpy.1	LPPR3|79948	0	-0.1139	0	0	0
567	uc003ipu.1	uc003ipu.1	0.1137	0	0	0	0
568	uc001kgz.2	HTR7|3363	0.1137	0	0	0	0
569	uc002ibh.2	RAMP2|10266	0	0	0	0.1136	0
570	uc003mjw.2	ADAMTS2|9509	0.1134	0	0	0	0
571	uc010eyw.2	CAD|790	-0.1132	0	0	0	0
572	uc011cyn.1	BRD8|10902	0	0	0	0	-0.1131
573	uc003bcn.3	NFAM1|150372	0.1129	0	0	0	0
574	uc002xto.2	SULF2|55959	0.053	-0.1129	0	0	0
575	uc002fyn.2	ARRB2|409	0	0	0	0	-0.1128
576	uc002rsa.2	SLC8A1|6546	0.1128	0	0	0	0
577	uc003szs.2	CREB5|9586	0.1125	0	0	0	0
578	uc001qun.2	CLEC4D|338339	0.1125	0	0	0	0
579	uc003onu.1	MDGA1|266727	0	-0.112	0.0028	0	0
580	uc004eyf.2	FAM127B|26071	0	-0.1119	0	0	0
581	uc002msh.3	ACP5|54	0	0.1118	0	0	0
582	uc002svx.2	ITPRIPL1|150771	0	0	0.1114	0	0
583	uc003num.2	LST1|7940	0.1003	0	0	0	-0.1113
584	uc003cvy.2	QARS|5859	0	0	0	0	-0.1113
585	uc003mex.1	UNC5A|90249	0.1113	0	0	0	0
586	uc001omm.1	uc001omm.1	0	0	0	0	-0.1112
587	uc001vpo.2	C13orf27|93081	-0.0341	0	0.111	0	0
588	uc003sym.3	HOXA4|3201	0	-0.1109	0	0	0
589	uc002sel.3	CNRIP1|25927	0	0	0	0.1105	0
590	uc002vxj.2	RAMP1|10267	0	0	0	0.1104	0
591	uc004exc.1	GPC4|2239	0	0	0	0	0.1104
592	uc003pes.1	uc003pes.1	0	0	0	0.1101	0
593	uc002gwm.3	ULK2|9706	0.11	0	0	0	0
594	uc011kfh.1	NCF1|653361	0.1099	0	0	0	0
595	uc001feg.2	C1orf43|25912	0	0	0	0	-0.1097
596	uc001fgv.1	ADAM15|8751	0	0	0	0	-0.1096
597	uc002lqb.2	ELANE|1991	0	0	0	0	0.109
598	uc002vgy.1	RUFY4|285180	0.1089	0	0	0	0
599	uc010rhp.1	MTCH2|23788	0	0	0.1088	0	0
600	uc002xib.2	BPI|671	0.1088	0	0	0	0
601	uc003ynz.2	TRPS1|7227	0	-0.1087	0	0	0
602	uc003cqb.1	ALS2CL|259173	0	0	0	0	-0.1086
603	uc003ldh.2	CTNNA1|1495	0	-0.1085	0	0	0
604	uc001oae.2	RPS6KA4|8986	0	0	0	0	-0.1081
605	uc010ovd.1	GPSM2|29899	0	0.0201	0	0	-0.1081
606	uc002mfm.2	C3|718	0.1081	0	0	0	0
607	uc003uvv.1	TFR2|7036	-0.1077	0	0	0	0
608	uc011crj.1	uc011crj.1	0.1076	0	0	0	0
609	uc001bnu.3	TMEM222|84065	0	0	0.1075	0	0
610	uc001zrt.2	MAP1A|4130	-0.1074	0	0	0	0
611	uc002emq.2	KIFC3|3801	0	0	0	0.1072	0
612	uc003eho.2	ITGB5|3693	0	-0.1071	0	0	0
613	uc002plr.1	RUVBL2|10856	0	0	0	0	-0.107
614	uc001oxb.2	DGAT2|84649	0.1069	0	0	0	0
615	uc001jbp.2	RASSF4|83937	0.1069	0	0	0	0
616	uc003obn.1	HLA-DRB6|3128	0.1068	0	0	0	0
617	uc001jvp.1	CAMK2G|818	-0.1066	0	0	0	0
618	uc002toq.1	MYO7B|4648	0	0.1065	0	0	0
619	uc010sfn.1	GPR162|27239	0	-0.1065	0	0	0
620	uc010rhq.1	AGBL2|79841	0	0	0.1063	0	0
621	uc010xqp.1	LOC729991-MEF2B|4207	0	0	0	0.1062	0
622	uc001ofz.2	EFEMP2|30008	0.106	0	0	0	0
623	uc004cvd.2	TLR8|51311	0.1059	0	0	0	0
624	uc009xes.2	CDC42BPA|8476	0	0	0	0.1058	0
625	uc011cch.1	PRKG2|5593	0	0	0	0.1053	0
626	uc002lzo.2	SIRT6|51548	0	0	0	0	-0.1052
627	uc001wzi.2	GNG2|54331	0	0	-0.1052	0	0
628	uc010zjt.1	IGFBP2|3485	-0.1052	0	0	0	0
629	uc002gel.2	CLEC10A|10462	0.105	0	0	0	0
630	uc010dru.1	LPPR3|79948	0	-0.1049	0	0	0.0554
631	uc002isl.2	ABCC3|8714	0.1049	0	0	0	0
632	uc002ckt.2	CACNA1H|8912	0	0	0	0.1047	0
633	uc001otl.2	P2RY2|5029	0.1046	0	0	0	0
634	uc001fmh.1	RIT1|6016	0	0	0	0	-0.1042
635	uc003fcd.2	GFM1|85476	0	0	0	0	-0.1039
636	uc001doy.1	EVI5|7813	0.1039	0	0	0	0
637	uc010jcx.1	SNCAIP|9627	0	0	0	0	0.1039
638	uc002vmj.2	OBSL1|23363	0	-0.1036	0	0	0
639	uc003jhv.2	NPR3|4883	0	0	0	0	-0.1031
640	uc003beo.2	PARVB|29780	0	0	0	0	-0.1031
641	uc002ehz.3	MMP2|4313	-0.103	0	0.0636	0	0.0628
642	uc004bqd.2	PBX3|5090	-0.0008	0	0.103	0	0
643	uc001osu.2	ARAP1|116985	0	0	0	0	-0.103
644	uc003csj.1	CAMP|820	0.1027	0	0	0	0
645	uc004dua.3	ALAS2|212	0	0.1024	0	0	0
646	uc002inv.2	HOXB7|3217	0	0	0	0	0.1024
647	uc004fnu.1	IL9R|3581	0	0.1021	0	0	0
648	uc003obo.1	HLA-DRB6|3128	0	0	0	0	-0.1018
649	uc002hsd.2	STARD3|10948	0	0	0	0	-0.1017
650	uc002eht.1	IRX3|79191	0	0	0	0	0.1017
651	uc004fsv.2	DDX3Y|8653	0	0	0	0.1016	0
652	uc002slu.2	TTC31|64427	0	0.0455	-0.1015	0	0
653	uc001oep.1	EHBP1L1|254102	0	0	0	0	-0.1009
654	uc003rdc.2	C6orf134|79969	0	0	0	0.0252	-0.1009
655	uc002nls.2	RFXANK|8625	0	0	0	0.1008	0
656	uc003adj.2	MN1|4330	0	0	0	0.1	-0.079
657	uc001bse.2	SDC3|9672	0.1	0	0	0	0
658	uc010lpa.2	FAM131B|9715	0	0	0	0.0999	0
659	uc003lbf.3	TGFBI|7045	0.0998	0	0	0	0
660	uc004ebt.2	SLC16A2|6567	0	0	0	0.0995	0
661	uc001omo.1	NUDT8|254552	0	0	0	0	-0.0995
662	uc001dxm.1	SORT1|6272	0.0994	0	0	0	-0.0573
663	uc002juk.2	TMC6|11322	0	0	0	0	-0.0992
664	uc001ypu.1	PLD4|122618	0	0	0	0	-0.0991
665	uc003yhw.2	PGCP|10404	0	0	0	0	-0.099
666	uc001mef.2	ILK|3611	0	0	0	0	-0.099
667	uc002tld.2	uc002tld.2	0	0	0	0	0.0988
668	uc003idl.2	MAD2L1|4085	0	0	0	0	-0.0988
669	uc004chd.2	GPSM1|26086	-0.0985	0	0	0	0
670	uc002tuu.1	LCT|3938	0	0	0.098	0	0
671	uc011ads.1	SYNJ1|8867	0	0.0973	0	0	0
672	uc003mmz.1	TRIM7|81786	0.0973	0	0	0	0
673	uc001ojd.2	SPTBN2|6712	0	0.0968	0	0	0
674	uc011ack.1	CYYR1|116159	0	0	0	0.0961	0
675	uc002osq.2	POU2F2|5452	0.0961	0	-0.0364	0	0
676	uc010ccf.2	CES1|1066	0.096	0	0	0	0
677	uc003awd.2	uc003awd.2	-0.096	0	0	0	0
678	uc004bgk.2	SLC46A2|57864	0.0959	0	0	0	0
679	uc003ocb.1	TAP2|6891	0	0	0	0	-0.0958
680	uc011mcg.1	NUP214|8021	0.0955	0	0	0	0
681	uc003cah.2	BTD|686	0	0	0.0955	0	0
682	uc001alv.1	KCNAB2|8514	0	0.0954	0	0	0
683	uc010rli.1	TMEM138|51524	0.0954	0	0	0	0
684	uc001iqn.3	C10orf114|399726	0	-0.0954	0.0444	0	0
685	uc010gpw.2	ITGB2|3689	0.0953	0	0	0	0
686	uc010boe.2	FAM174B|400451	0	0	0	0	0.0953
687	uc001jli.2	RHOBTB1|9886	0	0	0	0.0953	0
688	uc001zxy.2	HDC|3067	0	0	0	0	0.0952
689	uc002ltt.3	TCF3|6929	-0.0952	0	0	0	0
690	uc002rch.1	MYCNOS|10408	-0.0952	0	0	0	0
691	uc003ocs.1	HLA-DPA1|3113	0	0	0	0	-0.0952
692	uc001mpx.2	HTATIP2|10553	0	0	0	0	-0.0949
693	uc001vkk.1	SLAIN1|122060	0	0.0948	0	0	0
694	uc002wye.2	DNMT3B|1789	0	0	0.0946	0	-0.0367
695	uc003obi.2	HLA-DRA|3122	0	0	0	0	-0.0946
696	uc001xix.2	GPHN|10243	0	0	0	0.0945	0
697	uc010fwz.1	DOCK10|55619	0.0943	0	0	0	0
698	uc001wgr.3	SLC7A7|9056	0.0943	0	0	0	0
699	uc001vye.3	RNASE6|6039	0.0942	0	0	0	0
700	uc001lba.2	ADRB1|153	0	0	0.094	0	0
701	uc003ouu.1	CRIP3|401262	0.0939	0	0	0	0
702	uc001qlp.2	TSPAN9|10867	0	0	0	0.0937	0
703	uc010ncb.2	UAP1L1|91373	0	0	0	0	-0.0935
704	uc010fan.1	SLC8A1|6546	0.0935	0	0	0	0
705	uc001dqz.3	CNN3|1266	0	0	0	0.0934	0
706	uc001dfp.1	PTGER3|5733	0	0	0	0	0.0928
707	uc009wgk.1	RHOC|389	0	-0.0925	0	0	0
708	uc002gmx.2	TMEM220|388335	0	0	0.0923	0	0
709	uc011dqy.1	VPS52|6293	0	0	0	0	-0.0923
710	uc001qbn.2	SLC37A2|219855	0.0919	0	0	0	-0.0027
711	uc004ccj.3	GTF3C5|9328	-0.0918	0	0	0	0
712	uc002mwd.2	NFIX|4784	0	0	0.0917	0	0
713	uc010eet.2	ZNF146|7705	-0.0916	0	0	0	0
714	uc003jfj.2	FAM105A|54491	0.0916	0	0	0	0
715	uc001oif.1	DPP3|10072	0	0	0	0	-0.0913
716	uc001yss.2	KIAA0125|9834	-0.0911	0	0	0	0
717	uc010xhk.1	C19orf77|284422	-0.0907	0	0	0	0
718	uc010vhv.1	GPR97|222487	0	0	0.0907	0	0
719	uc011lpk.1	CLTA|1211	0	0	0	0.0107	-0.0906
720	uc001fea.1	TPM3|7170	-0.0904	0	0	0	0
721	uc002zmc.2	uc002zmc.2	0.0903	0	0	0	0
722	uc001mwp.2	PRR5L|79899	0	0	0.0101	0	-0.0903
723	uc010wgb.1	DNAJC7|7266	-0.0901	0	0	0	0
724	uc010ead.2	HSH2D|84941	-0.0901	0	0	0	0
725	uc011mqr.1	ITM2A|9452	0	0	0	0.09	0
726	uc002yqg.2	SYNJ1|8867	0	-0.0897	0	0	0
727	uc011cbd.1	ANKRD17|26057	0	0	0	0	-0.0895
728	uc001uqt.1	CDK8|1024	0	-0.0893	0	0	0
729	uc004bkb.2	TLR4|7099	0.0867	-0.0889	0	0	0
730	uc003hwy.2	NHEDC2|133308	0	0	0	0	-0.0889
731	uc003too.2	UPP1|7378	0.0353	0	-0.0888	0	0
732	uc002zep.2	C21orf2|755	-0.0887	0	0	0	0
733	uc010sov.1	ZNF385A|25946	0.0886	0	0	0	0
734	uc003mtp.2	FOXC1|2296	0	0	0	0	0.0886
735	uc010bff.2	MYO5C|55930	0	0	0.0884	0	0
736	uc003hpk.2	ARHGAP24|83478	0.0884	0	0	0	0
737	uc002zny.2	USP18|11274	0	0	0	0	-0.0882
738	uc001ijj.1	PRKCQ|5588	-0.0881	0	0	0	0
739	uc002bfj.2	FAH|2184	0	0	0	0	-0.0881
740	uc002qhx.1	FCAR|2204	0.0881	0	0	0	0
741	uc004apl.2	CTSL1|1514	0.0881	0	0	0	0
742	uc003kii.3	VCAN|1462	0.088	0	0	0	0
743	uc010cao.1	ITGAX|3687	0.0877	0	0	0	0
744	uc002jbg.2	MAP3K3|4215	0.0876	0	0	0	0
745	uc002nji.1	FKBP8|23770	0	0	0	0	-0.0875
746	uc001ldd.1	SLC18A2|6571	0	0	0	0.0875	0
747	uc002tor.1	MYO7B|4648	0	0.0874	0	0	0
748	uc002pog.2	FCGRT|2217	0.0874	0	-0.0775	0	0
749	uc001hms.2	MOSC1|64757	0.0874	-0.0011	0	0	0
750	uc001rxc.3	SLC11A2|4891	0	0	0	0	-0.0873
751	uc010ywy.1	uc010ywy.1	0	0	0.0872	0	0
752	uc001uwx.2	STOML3|161003	0	0	0.0872	0	0
753	uc003ibj.2	CAMK2D|817	0.087	0	0	0	0
754	uc002hjy.1	MMP28|79148	0	0	0	0.087	0
755	uc003vgh.2	IFRD1|3475	0	0	0.0868	0	0
756	uc001psg.2	AMICA1|120425	0.0867	0	0	0	0
757	uc001fhh.2	EFNA1|1942	0	0	0	0.0865	0
758	uc001kgw.1	uc001kgw.1	0	0	0	0	-0.0863
759	uc002qgh.1	LILRA1|11024	0.0861	0	0	0	0
760	uc002iug.1	HLF|3131	0	0	0.0861	0	0
761	uc003hbk.2	KIAA1211|57482	0	0	0	0.0859	0
762	uc011mwr.1	SLITRK2|84631	0	0	0	0	0.0852
763	uc003dop.2	FOXP1|27086	0	0	0.0852	0	0
764	uc002nib.1	PIK3R2|5296	0.085	0	0	0	0
765	uc003xqh.1	CEBPD|1052	0.0849	0	0	0	0
766	uc002eow.2	CKLF|51192	0	0	0	0	-0.0848
767	uc001zna.2	SPINT1|6692	0	0	0	0.0848	0
768	uc010fva.1	FN1|2335	0.0845	0	0	0	0
769	uc001jbr.3	C10orf10|11067	0	-0.0844	0	0	0
770	uc001cer.1	MYCL1|4610	0.0843	0	0	0	0
771	uc004doq.1	CLCN5|1184	0.0843	0	0	0	0
772	uc003fda.2	IFT80|57560	0	0	0.0842	0	0
773	uc003bmg.2	ODF3B|440836	0.0841	0	0	0	0
774	uc003wxh.1	CNOT7|29883	0	0	0	0	-0.0841
775	uc002iuv.3	SCPEP1|59342	0.0841	0	0	0	0
776	uc002ast.2	LARP6|55323	0	0	0	0	0.0839
777	uc001fqj.1	PEAR1|375033	0	0	0	0.0834	0
778	uc011lio.1	MTSS1|9788	0.0833	0	0	0	0
779	uc001qwj.2	CLECL1|160365	0	0	0	0	-0.0829
780	uc001gdx.1	ILDR2|387597	0	0	0	0	-0.0826
781	uc002iju.3	MAPT|4137	0	0	-0.0825	0	0.0043
782	uc001nnr.2	DTX4|23220	0.0823	0	0	0	0
783	uc001jrx.3	CDH23|64072	0.0822	0	0	0	0
784	uc002hid.1	CCL1|6346	0	0	0.0821	0	0
785	uc001nkv.3	YPEL4|219539	0	0.082	0	0	0
786	uc002kog.2	RAB31|11031	0.0581	0	0	0	-0.0818
787	uc004edh.2	ITM2A|9452	-0.0814	0	0	0	0
788	uc004bka.2	TLR4|7099	0.081	0	0	0	0
789	uc001jpd.2	VPS26A|9559	0	0	0	0	0.0808
790	uc003krc.2	TICAM2|353376	0.0808	0	0	0	0
791	uc002xjw.1	ZHX3|23051	0	0	0	0	-0.0808
792	uc002mhh.1	C19orf59|199675	0.0807	0	0	0	0
793	uc001aie.2	NADK|65220	0.0805	0	0	0	0
794	uc010bcl.2	MAPKBP1|23005	-0.0804	0	0	0	0
795	uc001noz.2	MS4A4A|51338	0.0804	0	0	0	0
796	uc004eir.2	BEX5|340542	0	0	0	0.0804	0
797	uc002gcx.1	FAM64A|54478	0	0	0	0.0803	0
798	uc003ftn.2	OPA1|4976	0	0	0	0	0.0802
799	uc003hte.1	HPGDS|27306	0	0.0801	0	0.0164	0
800	uc002rbz.1	FAM84A|151354	0	0	0	0	0.0799
801	uc001rcd.2	GUCY2C|2984	0.0797	0	0	0	0
802	uc003oqy.1	TFEB|7942	0.0797	0	0	0	0
803	uc001jgu.2	ARHGAP22|58504	0	0	0.0795	0	0
804	uc002wtm.2	CST3|1471	0.0794	0	0	0	0
805	uc002jxt.1	CARD14|79092	0.0794	0	0	0	0
806	uc009zsv.2	PLXNC1|10154	0.0791	0	0	0	0
807	uc004fuf.2	KDM5D|8284	0	0	0	0	-0.0791
808	uc003jde.2	IRX1|79192	0	0	0	0	0.0789
809	uc001sia.2	MMP19|4327	0	-0.0788	0	0	0
810	uc002ldh.2	uc002ldh.2	0	0.0787	0	0	0
811	uc011afl.1	ITGB2|3689	0.0786	-0.0253	0	0	0
812	uc004ezq.2	FHL1|2273	0	0	0	0	-0.0784
813	uc001wan.2	SUPT16H|11198	0	-0.0783	0	0	0
814	uc002vhp.1	TMBIM1|64114	0	0	0	0	-0.0782
815	uc002isn.2	ABCC3|8714	0.0782	0	0	0	0
816	uc003ocu.1	HLA-DPB1|3115	0	0	0	0	-0.0782
817	uc002zlz.1	uc002zlz.1	0.078	0	0	0	0
818	uc010iov.2	SMAD1|4086	0	0	0	0.0777	0
819	uc010maw.2	TMEM67|91147	0	0	0.0777	0	0
820	uc001ivn.2	ZNF438|220929	0.0776	0	0	0	0
821	uc010abq.2	CCNA1|8900	0	0	0.077	0	0
822	uc003nbv.1	ATXN1|6310	0.077	0	0	0	0
823	uc004bss.2	ST6GALNAC4|27090	0	0	0.077	0	0
824	uc010rkx.1	STX3|6809	0	0	0	0	-0.0764
825	uc002kvk.2	ZNF521|25925	0	0	-0.0764	0	0
826	uc001xgt.2	SYNE2|23224	0	0	0.0763	0	0
827	uc002hgr.2	UTP6|55813	0	0	0	0	-0.076
828	uc002aga.2	MYO1E|4643	0.0759	0	0	0	0
829	uc002zoj.3	PRODH|5625	-0.0179	0	0.0757	0	0
830	uc010dzw.2	ILVBL|10994	-0.0756	0	0	0	0
831	uc002pem.2	PPP5C|5536	0	0	0	0	-0.0755
832	uc011cdw.1	SMARCAD1|56916	-0.0755	0	0	0	0
833	uc003guz.2	RHOH|399	-0.0752	0	0	0	0
834	uc002inr.2	HOXB5|3215	0	-0.0539	0.0751	0	0
835	uc010vot.1	FBXO31|79791	0	0	0	0	0.0751
836	uc003ddb.2	TLR9|54106	0	0	0.075	0	0
837	uc002jpf.2	SAP30BP|29115	0	0	0	0	-0.0749
838	uc009vpf.2	ARHGEF10L|55160	0.0749	0	0	0	0
839	uc004cjz.2	FBXW5|54461	0	0	0	0	-0.0748
840	uc001qjo.2	CACNA2D4|93589	0.0747	0	0	0	-0.0589
841	uc002wfs.2	SIRPA|140885	0.0747	0	0	0	0
842	uc003qds.2	VNN2|8875	0.0747	0	0	0	0
843	uc010syf.1	SH2B3|10019	0	-0.0746	0	0	0
844	uc002cra.1	uc002cra.1	0	-0.0746	0	0	0
845	uc010can.2	ITGAM|3684	0	0	-0.0745	0	0
846	uc009yib.1	HTATIP2|10553	0	0	0	0	-0.0742
847	uc002iet.2	NAGS|162417	0.074	0	0	0	0
848	uc010fef.2	DYSF|8291	0.0739	0	0	0	0
849	uc002eqa.2	CMTM4|146223	0	0	0	0	-0.0738
850	uc010api.2	TIMM9|26520	0	0	0	0	0.0735
851	uc002vgx.2	CXCR2P1|3580	0.0734	0	0	0	0
852	uc002phj.3	EHD2|30846	-0.0732	0	0	0	0
853	uc010ayu.2	ATP10A|57194	0	0	0	0	-0.0732
854	uc004cpn.2	CSF2RA|1438	0.073	0	0	0	0
855	uc003juf.2	NLN|57486	0	0	0	0	-0.073
856	uc010nyi.1	PUSL1|126789	0	-0.0729	0	0	0
857	uc003obh.2	HLA-DRA|3122	0	0	0	0	-0.0728
858	uc004crj.2	uc004crj.2	-0.0725	0	0	0	0
859	uc010upw.1	KIF7|374654	-0.0725	0	0	0	0
860	uc009wsc.1	TTC24|164118	-0.0723	0	0	0	0
861	uc001hdt.1	C1orf186|440712	-0.0722	0	0	0	0
862	uc002xwn.2	ZFP64|55734	0.0721	0	0	0	0
863	uc001jpl.3	HK1|3098	0	0	0	0	-0.072
864	uc003ipp.3	FAM198B|51313	0.0718	0	0	0	0
865	uc002fjh.2	IRF8|3394	0.0717	0	0	0	0
866	uc002tea.1	SULT1C4|27233	0	0	0.0716	0	0
867	uc001jgr.2	ARHGAP22|58504	-0.0232	0	0.0715	0	0
868	uc002sex.2	ARHGAP25|9938	0	0	0.0714	0	0
869	uc002qbp.2	LOC147804|147804	0	0	0.0711	0	0
870	uc004dln.2	PQBP1|10084	0	0	0	0	-0.071
871	uc010jue.1	HLA-DMB|3109	0.0709	0	0	0	0
872	uc003mez.2	HK3|3101	0.0708	0	0	0	0
873	uc001ned.2	DDB2|1643	-0.0064	0	0	0.0708	0
874	uc010fvq.1	SLC11A1|6556	-0.0708	0	0	0	0
875	uc003ccr.2	RPL15|6138	0	-0.0708	0	0	0
876	uc009yuo.1	ACER3|55331	0.0707	0	0	0	0
877	uc011afm.1	C21orf67|84536	0	0	0	0	-0.0704
878	uc002lsj.2	GAMT|2593	-0.0703	0	0	0	0
879	uc003aos.2	APOL3|80833	0	0	0	0	-0.0696
880	uc001oyh.3	PAK1|5058	0	0	0	0	-0.0696
881	uc003pdr.2	BAG2|9532	0	0	0.0692	0	0
882	uc001dfq.2	PTGER3|5733	0	0	0	0	0.0691
883	uc001fno.2	SEMA4A|64218	0.0364	0	0	0	-0.0689
884	uc001vxz.2	ANG|283	0.0689	0	0	0	0
885	uc002zma.2	CECR6|27439	0.0689	0	0	0	0
886	uc002dqp.2	SULT1A1|6817	-0.0687	0	0	0	0
887	uc010tbb.1	NCOR2|9612	0	0	0	0	-0.0685
888	uc011lyh.1	GSN|2934	0	0	0	0	-0.0684
889	uc010zjx.1	GPBAR1|151306	0.0684	0	0	0	0
890	uc010pbg.1	FCGR1C|100132417	0.0681	0	0	0	0
891	uc003elo.1	RAB43|339122	0	0	0	0.0681	0
892	uc001fwo.1	CD48|962	0	0	-0.068	0	0
893	uc003lgj.1	CD14|929	0.068	0	0	0	0
894	uc001npa.2	MS4A4A|51338	0.068	0	0	0	0
895	uc010yft.1	TNNI3|7137	0	0.0679	0	0	0
896	uc009wet.1	CLCC1|23155	0	0	0	0	-0.0679
897	uc002dmh.2	RBBP6|5930	0	0	0.0677	0	0
898	uc001rzk.2	ACVRL1|94	0.0676	0	0	0	0
899	uc004faf.1	RBMX|27316	0	0	0.0674	0	0
900	uc010twn.1	SLC24A4|123041	0	0	0	-0.0673	0
901	uc009yqv.2	C11orf68|83638	0	0	0	0	-0.067
902	uc004css.2	TBL1X|6907	0.067	0	0	0	0
903	uc002elv.3	DOK4|55715	-0.0669	0	0	0	0
904	uc003pnd.3	RRAGD|58528	0	0	0	0	-0.0667
905	uc002ghu.2	CD68|968	0.0667	0	0	0	-0.013
906	uc003kdc.3	ENC1|8507	0.0666	0	0	0	-0.0001
907	uc001qmk.1	PARP11|57097	0	0	0	0	0.0665
908	uc003xpt.2	FNTA|2339	0.0665	0	0	0	0
909	uc001rre.1	PFKM|5213	0	0	0	0.0664	0
910	uc002qgm.2	LILRB1|10859	0.0199	-0.0664	0	0	0
911	uc010luq.1	PTK2B|2185	0	0	0	0	-0.0661
912	uc001uip.2	STX2|2054	0.066	0	0	0	0
913	uc010yqi.1	MEIS1|4211	0	0	0.066	0	0
914	uc002eia.3	MMP2|4313	0	0	0	0	0.0659
915	uc002hka.2	MMP28|79148	0	0	0	0.0204	-0.0659
916	uc010jda.2	CSNK1G3|1456	0.0654	0	0	0	0
917	uc003uds.1	HIP1|3092	0	0	0	0	-0.0654
918	uc001enw.1	RBM8A|9939	-0.0652	0	0	0	0
919	uc010udm.1	EPB42|2038	0	0.0652	0	0	0
920	uc001yml.1	TNFAIP2|7127	0	-0.065	0	0	0
921	uc010nbp.2	EGFL7|51162	0	0	0	0.0093	-0.065
922	uc002clb.1	TPSD1|23430	0	0	0	0.0649	0
923	uc002osa.2	ARHGEF1|9138	0	0.0648	0	0	0
924	uc001hnw.1	TLR5|7100	0.0644	0	0	0	0
925	uc010bcv.1	CAPN3|825	0.0644	0	0	0	0
926	uc003pty.1	WASF1|8936	-0.0643	0	0	0	0
927	uc001lzf.1	TRIM68|55128	-0.0643	0	0	0	0
928	uc002jpg.2	ITGB4|3691	0	0	0	0.064	0
929	uc003bmh.2	ODF3B|440836	0.0638	0	0	0	0
930	uc011jwz.1	ZNF853|54753	0	0	0	0	0.0636
931	uc009vvz.2	CAP1|10487	0	0	0	0	-0.0636
932	uc004bjd.3	C9orf91|203197	0	0	0	0	-0.0635
933	uc010pai.1	uc010pai.1	0.0633	0	0	0	0
934	uc003xok.2	ANK1|286	0	0.0632	0	0	0
935	uc003gjl.2	S100P|6286	0.0632	0	0	0	0
936	uc002wtn.1	CST3|1471	0.0628	-0.0111	0	0	0
937	uc001wgs.3	SLC7A7|9056	0.0627	0	-0.0417	0	0
938	uc001rax.2	DDX47|51202	0	0	0	0	-0.0627
939	uc003lrb.1	PPARGC1B|133522	0	0	0	0	-0.0627
940	uc001rky.2	FGD4|121512	0.0624	0	0	0	0
941	uc002jxj.2	TBC1D16|125058	-0.0623	0	0	0	0
942	uc010qxc.1	TNNI2|7136	0	0	0	0.0623	0
943	uc002qfb.2	LILRB2|10288	0.062	0	0	0	0
944	uc003xga.1	SCARA3|51435	0	0	0	0	0.0619
945	uc003yle.2	BAALC|79870	0	0	0	0	-0.0619
946	uc002ins.1	HOXB6|3216	0	0	0.0618	0	0
947	uc003lei.2	MGC29506|51237	-0.0616	0	0	0	0
948	uc001tgb.2	APAF1|317	0	0	0	0	-0.0615
949	uc003hwj.2	UBE2D3|7323	0	0	0	0	-0.0614
950	uc002voa.2	DOCK10|55619	0.0613	0	0	0	0
951	uc002jbc.2	DCAF7|10238	0	0	0	0	-0.0612
952	uc004bhj.2	HDHD3|81932	0	0	-0.0611	0	0
953	uc002sml.1	HTRA2|27429	0	0.0609	0	0.0386	0
954	uc009ykh.2	CD44|960	0	0	0	0	-0.0606
955	uc002wrl.2	SLC24A3|57419	0	0	0	0	0.0603
956	uc001oxa.2	DGAT2|84649	0	0	0	0.0602	0
957	uc002vax.2	NRP2|8828	0	0	0	0.0602	0
958	uc001ibf.1	KIF26B|55083	0	0	0	0	-0.0599
959	uc002nqz.1	uc002nqz.1	0	0	0.0596	0	0
960	uc003cjl.2	CX3CR1|1524	0.0596	0	0	0	0
961	uc001ofi.2	KAT5|10524	0	0	0	0	-0.0594
962	uc002fsz.1	SCARF1|8578	0	0	0.0593	0	0
963	uc002ueq.2	DHRS9|10170	0.0591	0	0	0	0
964	uc003ejn.2	TPRA1|131601	0	0	0	0	-0.0591
965	uc003zcb.2	FBXL6|26233	0	0	0.0591	0	0
966	uc003qck.2	AKAP7|9465	0	0	0	0	-0.0591
967	uc002vnm.2	SCG2|7857	0	0	0	0	0.059
968	uc003lrz.2	TCOF1|6949	-0.059	0	0	0	0
969	uc003eko.2	GATA2|2624	-0.0589	0	0	0	0
970	uc002ein.2	CES1|1066	0.0589	0	0	0	0
971	uc010grl.2	PRODH|5625	0	0	0.0587	0	0
972	uc002qez.2	LILRB5|10990	0.0586	0	0	0	0
973	uc003qme.1	SASH1|23328	0.0586	0	0	0	-0.0115
974	uc004cab.1	AIF1L|83543	0	0	0.0585	0	-0.0498
975	uc011dqn.1	HLA-DPB1|3115	0	0	0	0	-0.0584
976	uc011bkt.1	CCDC48|79825	0	-0.0257	0	0.0584	0
977	uc010myt.1	IER5L|389792	0.0584	0	0	0	0
978	uc004bhk.2	HDHD3|81932	0	0	0.0583	0	0
979	uc003gvd.2	RBM47|54502	0	-0.0583	0	0	0
980	uc001qoo.2	NCAPD2|9918	0	0	0.0582	0	0
981	uc003del.2	STAB1|23166	0	-0.0581	0	0	0
982	uc002coi.2	SLC9A3R2|9351	0	0	0	0	-0.0579
983	uc001gav.2	FCGR2C|9103	0.0579	0	0	0	0
984	uc004fcq.2	AFF2|2334	0	0.0577	0	0	0
985	uc003iqr.1	MARCH1|55016	0.0577	0	0	0	0
986	uc010bwj.2	LYRM1|57149	-0.0577	0	0	0	0
987	uc002gbf.1	uc002gbf.1	-0.0576	0	0	0	0
988	uc003syk.2	HOXA3|3200	0	-0.0573	0.0536	0	0
989	uc003dsy.2	ST3GAL6|10402	0.0573	0	0	0	0
990	uc003yuv.2	KHDRBS3|10656	0	0	0	0	0.0571
991	uc001ysq.2	KIAA0125|9834	-0.0571	0	0	0	0
992	uc002otg.2	PAFAH1B3|5050	-0.0571	0	0	0	0
993	uc010sqn.1	STAT2|6773	0	0	0	0	-0.057
994	uc004ahn.2	MAMDC2|256691	0.057	0	0	0	0
995	uc010vsj.1	PLD2|5338	0.057	0	0	0	0
996	uc003bma.2	SCO2|9997	0.057	0	0	0	0
997	uc003bby.2	NAGA|4668	0.057	0	0	0	-0.019
998	uc002gdb.1	FAM64A|54478	0.0568	0	0	0	0
999	uc004ayk.2	CORO2A|7464	0	0	0	-0.0568	0
1000	uc010qed.1	LOC220930|220930	-0.0567	0	0	0	0
1001	uc002jkd.2	TTYH2|94015	0	-0.0567	0	0	0
1002	uc001fua.1	DUSP23|54935	0	0	0	0.0566	0
1003	uc002haw.1	IFT20|90410	0	0	0	0	-0.0565
1004	uc001hxu.1	EDARADD|128178	0	0	0	0	-0.0564
1005	uc011mhb.1	CSF2RA|1438	0.0472	-0.0564	0	0	0
1006	uc003gsa.1	RBPJ|3516	0.0564	0	0	0	0
1007	uc002vkm.2	GLB1L|79411	0	0	0	0.0563	0
1008	uc010lsu.2	MSR1|4481	0.0562	0	0	0	0
1009	uc010sku.1	PPHLN1|51535	0	0	0.056	0	0
1010	uc001bzv.1	COL8A2|1296	0.0559	0	0	0	0
1011	uc004dzj.1	ZMYM3|9203	-0.0559	0	0	0	0
1012	uc001kgi.2	IFIT1|3434	0	0	0	0	-0.0559
1013	uc001jsb.1	C10orf105|414152	0	0	0	0	-0.0556
1014	uc010otf.1	EVI5|7813	0.0555	0	0	0	0
1015	uc009xss.2	TSPAN14|81619	-0.0417	0	0	0	0.0554
1016	uc002kwz.3	B4GALT6|9331	0	0	0	0	-0.0553
1017	uc002bof.2	KIF7|374654	-0.0552	0	0	0	0
1018	uc002sxc.2	ANKRD23|200539	0	0.0552	0	0	0
1019	uc002ckv.2	CACNA1H|8912	0	0	0	0.0551	0
1020	uc002qfe.2	LILRA5|353514	0.0551	0	0	0	0
1021	uc011dqd.1	HLA-DQB1|3119	0	0	0	0	-0.055
1022	uc003zae.1	PLEC|5339	0.055	0	0	0	0
1023	uc001ije.2	PFKFB3|5209	0.0548	0	0	0	0
1024	uc003dpc.2	uc003dpc.2	0.0547	0	0	0	0
1025	uc011ayi.1	MYD88|4615	0	0	0	0	-0.0544
1026	uc011dlf.1	ZNF187|7741	0	0	0	0	0.0544
1027	uc002xrm.2	CDH22|64405	0	0.0544	0	0	0
1028	uc002kmu.1	EPB41L3|23136	0.0541	0	0	0	0
1029	uc001ewq.2	MLLT11|10962	-0.0541	0	0	0	0
1030	uc001rnm.2	PRICKLE1|144165	0	0	0.0539	0	0
1031	uc010krz.1	HEATR2|54919	0	0	0.0539	0	0
1032	uc003tir.2	BLVRA|644	0.0354	0	0	0	-0.0537
1033	uc003ecj.3	ARHGAP31|57514	0.0537	0	0	0	0
1034	uc003lav.2	C5orf20|140947	0.0535	0	0	0	0
1035	uc010srd.1	STAT6|6778	0.0534	0	0	0	0
1036	uc001uit.3	GPR133|283383	0.0533	0	0	0	0
1037	uc001epm.3	CHD1L|9557	0	0	0	0	-0.0533
1038	uc010gzx.2	C22orf9|23313	0	0	0	0	-0.0532
1039	uc003eop.3	ACPP|55	0.0532	0	0	0	-0.0348
1040	uc009zjy.1	CNTN1|1272	0	0	0	0	0.0532
1041	uc010lbs.1	NCF1|653361	0.0531	0	0	0	0
1042	uc001nsa.2	DAGLA|747	0.0531	0	0	0	-0.0292
1043	uc003ctv.2	PFKFB4|5210	0.053	0	0	0	0
1044	uc003bfr.2	NUP50|10762	0	0	0	0	-0.053
1045	uc001wpq.2	CTSG|1511	0	0	0	-0.0528	0
1046	uc010xmr.1	DNASE2|1777	0	0	0	0	-0.0527
1047	uc001qfw.2	ST14|6768	0.0524	0	0	0	0
1048	uc002hbm.2	UNC119|9094	0	-0.0524	0	0	0
1049	uc001ywy.1	SNRPN|6638	0	0	0	0.0524	0
1050	uc002mnv.3	ICAM5|7087	0	0	0	0.0522	0
1051	uc001wgn.2	OXA1L|5018	0	0	0	0	-0.0522
1052	uc002mvk.2	MAST1|22983	0	0	0	0.0521	0
1053	uc011mso.1	COL4A5|1287	0	0	0	0	0.0521
1054	uc001sfu.2	GPR84|53831	0.0521	0	0	0	0
1055	uc004dpo.2	MAGED1|9500	-0.052	0	0	0	0
1056	uc002ptk.1	KLK1|3816	0.0518	0	0	0	0
1057	uc011anj.1	MFNG|4242	0	0	0	0	-0.0515
1058	uc003yow.3	DEPDC6|64798	-0.0513	0	0	0	0
1059	uc010mwy.1	GAPVD1|26130	0	0	0	0.0513	0
1060	uc011kkw.1	POLR2J3|548644	0	-0.0512	0.0093	0	0
1061	uc002rrt.2	TMEM178|130733	0	0	0.0512	0	0
1062	uc011cuo.1	CAST|831	0	-0.0511	0	0	0
1063	uc010nqx.2	SH2D1A|4068	0	0	0	0	-0.0511
1064	uc010faj.1	C2orf58|285154	0.0508	0	0	0	0
1065	uc002pxr.2	FPR2|2358	0.0506	0	0	0	0
1066	uc002tvc.2	HNMT|3176	0.0505	0	0	0	0
1067	uc002etn.2	RLTPR|146206	-0.0504	0	0	0	0
1068	uc001bst.2	SERINC2|347735	0.0501	0	0	0	0
1069	uc001wum.1	CLEC14A|161198	0	0	0.0501	0	0
1070	uc001mbf.2	TRIM6-TRIM34|445372	-0.0501	0	0	0	0
1071	uc002qeg.1	LILRB3|11025	0.0499	0	0	0	0
1072	uc001bca.2	PQLC2|54896	0	0	0	0	-0.0498
1073	uc002mwk.2	TRMT1|55621	-0.0498	0	0	0	0
1074	uc001ake.2	PRDM16|63976	-0.0351	0	0.0498	0	0
1075	uc011msg.1	ZCCHC18|644353	-0.0497	0	0	0	0
1076	uc011mcn.1	POMT1|10585	-0.0497	0	0	0	0
1077	uc002kwl.3	DSC2|1824	0	-0.0496	0	0	0
1078	uc010ocw.1	UBR4|23352	-0.0496	0	0	0	0
1079	uc002dqg.1	SULT1A2|6799	0.0492	0	-0.0252	0	0
1080	uc001esc.2	NBPF15|284565	0.049	0	0	0	0
1081	uc004dzi.1	ZMYM3|9203	0	0	0.0487	0	0
1082	uc001iiv.2	IL15RA|3601	0	0	0	0	-0.0487
1083	uc003lyl.3	uc003lyl.3	-0.0486	0	0	0	0
1084	uc010qig.1	SLC16A9|220963	0	0	0	0	0.0486
1085	uc001tsq.2	ACAD10|80724	0	-0.0486	0	0	0
1086	uc003hoj.3	HPSE|10855	0.0486	0	0	0	0
1087	uc003yrx.2	TRIB1|10221	0	-0.0485	0	0	0
1088	uc011byy.1	BEND4|389206	0	0	0	0.0484	0
1089	uc001xqg.2	FCF1|51077	0	0.048	0	0	0
1090	uc010gcu.1	RIN2|54453	0.0479	0	-0.0239	0	0
1091	uc002lpx.1	LPPR3|79948	0	0	0	0	0.0479
1092	uc009xgd.2	NID1|4811	0.0479	0	0	0	0
1093	uc001qbg.2	ROBO4|54538	0	0	0	0.0478	0
1094	uc010bne.1	AKAP13|11214	0	0	0	0	-0.0477
1095	uc010erj.2	LILRB2|10288	0.0475	0	0	0	0
1096	uc010fyw.2	ESPNL|339768	0	0.0474	0	0	0
1097	uc002cux.3	ZNF434|54925	0	0	0	0	-0.0474
1098	uc001rdb.2	EPS8|2059	0	0	0	0	-0.0473
1099	uc002ydf.2	NTSR1|4923	0	0	0	0	-0.0472
1100	uc001hdy.2	SRGAP2|23380	0.0472	0	0	0	0
1101	uc004bxs.2	C9orf106|414318	0.0471	0	0	0	0
1102	uc001zhz.2	SLC12A6|9990	0.0469	0	0	0	0
1103	uc001sds.2	TARBP2|6895	0	0	0	-0.0468	0.0437
1104	uc001eln.3	PDE4DIP|9659	0	0	0	0.0468	0
1105	uc003szb.1	HOXA13|3209	0	0	0.0468	0	0
1106	uc002mfn.2	GPR108|56927	0	-0.0467	0	0	0
1107	uc002pmy.2	TRPM4|54795	0.0467	0	0	0	0
1108	uc001pjy.2	ACAT1|38	0	0	0	0	-0.0466
1109	uc002yfg.2	PTK6|5753	0.0466	0	0	0	0
1110	uc001xop.2	ACOT6|641372	0	0	0	0.0464	0
1111	uc011mam.1	ENG|2022	0	0	-0.0463	0	0
1112	uc010jau.2	VCAN|1462	0.0462	0	0	0	0
1113	uc001rmm.1	CNTN1|1272	0	0	0	0	0.0458
1114	uc003hsf.1	FAM13A|10144	-0.0458	0	0.0286	0	0
1115	uc002txz.2	CACNB4|785	0.0455	0	0	0	0
1116	uc001ycz.3	SERPINA1|5265	0.0455	0	0	0	0
1117	uc001tjt.2	C12orf42|374470	0	0.0455	0	0	0
1118	uc004ebe.3	CXorf50B|653687	0	0	0	0	0.0453
1119	uc003sro.3	ICA1|3382	0	-0.0452	0	0	0
1120	uc009zml.1	KRT8|3856	0	0	0	0	0.045
1121	uc003tru.2	SUMF2|25870	-0.045	0	0	0	0
1122	uc001voa.3	UBAC2|337867	0	0	0	0	-0.0449
1123	uc002wfr.2	SIRPA|140885	0.0015	-0.0448	0	0	0
1124	uc010ofa.1	CCDC21|64793	0	0	0	0	0.0445
1125	uc001bgc.3	C1QC|714	0.0445	0	0	0	0
1126	uc009ysr.2	FAM86C|55199	0	0	0.0444	0	0
1127	uc002wxh.2	HCK|3055	0	0	0	0	-0.0442
1128	uc002uqb.2	TFPI|7035	-0.0442	0	0	0	0
1129	uc003hae.2	FIP1L1|81608	0	0	0	0	-0.0442
1130	uc001haa.2	LAX1|54900	0	0.0441	0	0	0
1131	uc011mth.1	PLS3|5358	0	0	0	0.044	0
1132	uc010uvf.1	PTX4|390667	0	0.0438	0	0	0
1133	uc002ayn.2	EDC3|80153	0	0.0438	0	0	0
1134	uc004ath.3	NINJ1|4814	0.0438	0	0	0	0
1135	uc003gfs.2	ADD1|118	0	0	0	0	-0.0437
1136	uc003hny.3	LIN54|132660	0	0	0	0.0436	0
1137	uc002dum.2	CDIPT|10423	0	0	0.0435	0	0
1138	uc010yjf.1	NOL10|79954	0	0	0	0	-0.0431
1139	uc010zpo.1	PSMF1|9491	0	0.0427	0	0	0
1140	uc011cmw.1	DAP|1611	0	0	0	0	0.0426
1141	uc001uhx.1	GLT1D1|144423	0.0426	0	0	0	0
1142	uc009whd.2	CD101|9398	0.0425	0	0	0	0
1143	uc002qfa.1	LILRB5|10990	0.0422	0	0	0	0
1144	uc001jnb.2	DNAJC12|56521	-0.0422	0	0	0	0
1145	uc011mdb.1	SURF4|6836	-0.0421	0	0	0	0
1146	uc001ivj.1	MAP3K8|1326	0	0	0	0	-0.042
1147	uc001zut.1	DUOX1|53905	0	0	0	0.0419	0
1148	uc003vrq.1	AKR1B1|231	0	-0.0417	0	0	0
1149	uc002xfv.2	SLA2|84174	-0.0417	0	0	0	0
1150	uc010kfx.2	VNN3|55350	0.0416	0	0	0	0
1151	uc002yah.2	TH1L|51497	0	0	0	0	-0.0416
1152	uc002fuy.1	KIAA0664|23277	0	0	0	0	-0.0416
1153	uc010ero.2	LILRA2|11027	0.0415	0	0	0	0
1154	uc001oic.3	PELI3|246330	0.0415	0	0	0	0
1155	uc001bqo.2	SNHG12|85028	0	0	0	0	-0.0414
1156	uc011doz.1	C4A|720	0	0	0	0	-0.0413
1157	uc010kev.2	TRMT11|60487	0	0	0	0	0.0412
1158	uc002ios.2	PHOSPHO1|162466	0.0411	0	0	0	0
1159	uc003gct.1	CTBP1|1487	0	-0.041	0	0	0
1160	uc003oix.2	HMGA1|3159	0	0	0	0	-0.0409
1161	uc001ncl.2	DGKZ|8525	-0.0409	0	0	0	0
1162	uc001aju.1	C1orf93|127281	0	0	0	0.0408	0
1163	uc002joc.2	CASKIN2|57513	0	0	0	0.0407	0
1164	uc011jya.1	HDAC9|9734	0.0406	0	0	0	0
1165	uc003exb.1	TM4SF1|4071	0	-0.0406	0	0	0
1166	uc002bad.2	NEIL1|79661	0	0	0	0	-0.0401
1167	uc003syp.1	uc003syp.1	0	-0.0401	0	0	0
1168	uc003xje.2	FUT10|84750	0	0	0.0401	0	0
1169	uc001gbb.1	FCGR2B|2213	0.04	0	0	0	0
1170	uc002uho.1	ITGA6|3655	0	0	0	0	-0.0399
1171	uc003syh.2	HOXA2|3199	0	-0.0394	0	0	0
1172	uc002tau.3	TBC1D8|11138	0.0392	0	0	0	0
1173	uc003xlb.2	DDHD2|23259	0	0	0	0	-0.0392
1174	uc001pdl.1	uc001pdl.1	0	-0.0391	0	0	0
1175	uc003hpj.2	ARHGAP24|83478	0.0391	0	0	0	0
1176	uc001yhi.1	WARS|7453	0.039	0	0	0	0
1177	uc011lxc.1	FKBP15|23307	0.0388	0	0	0	0
1178	uc010fon.2	TANC1|85461	0	0	0	0.0387	0
1179	uc003zun.1	ENHO|375704	0.0387	0	0	0	0
1180	uc010eax.1	GLT25D1|79709	0	0	0	0	-0.0386
1181	uc003ysh.1	MYC|4609	-0.0386	0	0	0	0
1182	uc001pik.2	CASP1|834	0.0385	0	0	0	0
1183	uc002mip.2	uc002mip.2	0	0	0	0.0383	0
1184	uc003iwu.1	ACSL1|2180	0	0	0	0	-0.0381
1185	uc010ujq.1	RPL4|6124	0	0	0	0	-0.0381
1186	uc010nrl.1	MBNL3|55796	0	0	0	0	-0.0381
1187	uc001iob.2	FAM171A1|221061	0	0	-0.0379	0	0
1188	uc003tkb.2	AEBP1|165	-0.0379	0	0	0	0
1189	uc003qdn.2	VNN1|8876	0	0	0.0379	0	0
1190	uc002ewe.2	ZFP90|146198	0	0	0	0	-0.0378
1191	uc002nqk.2	ZNF43|7594	0	0	0	0	0.0378
1192	uc003cbg.2	uc003cbg.2	0	0.0377	0	0	0
1193	uc011bwi.1	SORCS2|57537	0.0377	0	0	0	0
1194	uc004aai.2	RG9MTD3|158234	0	0	0.0377	0	0
1195	uc010ree.1	WIT1|51352	-0.0376	0	0	0	0
1196	uc002knw.2	ANKRD12|23253	0	-0.0376	0	0	0
1197	uc001wph.3	KHNYN|23351	0	0	0	0	-0.0375
1198	uc001yok.2	C14orf2|9556	0	0	0	0	0.0375
1199	uc002mfl.2	C3|718	0.0374	0	0	0	0
1200	uc011aoa.1	SUN2|25777	-0.0373	0	0	0	0
1201	uc004bho.3	C9orf43|257169	-0.0373	0	0	0	0
1202	uc002lpn.1	PALM|5064	-0.0371	0	0	0	0
1203	uc001tdc.2	PLXNC1|10154	0	0	0	0	-0.037
1204	uc002wjb.1	SIGLEC1|6614	0.037	0	0	0	0
1205	uc002ghv.2	CD68|968	0.037	0	0	0	0
1206	uc004edg.1	GPR174|84636	-0.0369	0	0	0	0
1207	uc003yad.2	LY96|23643	0.0369	0	0	0	0
1208	uc011aaj.1	C20orf166|128826	0	-0.0367	0	0	0
1209	uc002wab.3	AGXT|189	0	0	0.0366	0	0
1210	uc002glw.3	NTN1|9423	0	0	0.0365	0	0
1211	uc002lgb.1	TCF4|6925	0	0	0.0364	0	0
1212	uc003uvu.1	TFR2|7036	-0.0364	0	0	0	0
1213	uc003slx.2	EIF3B|8662	-0.0363	0	0	0	0
1214	uc010ffm.1	LOXL3|84695	0	0	0	0	-0.0362
1215	uc001ehz.2	PHGDH|26227	-0.0362	0	0	0	0
1216	uc003xae.2	NPM2|10361	-0.0362	0	0	0	0
1217	uc002vmi.2	OBSL1|23363	0	-0.0361	0	0	0
1218	uc003ipt.1	uc003ipt.1	0.0361	0	0	0	0
1219	uc003tfp.2	EPDR1|54749	-0.036	0	0	0	0
1220	uc002unq.1	UBE2E3|10477	0	-0.036	0	0	0
1221	uc001ikx.2	C10orf47|254427	0	0	0	0	-0.036
1222	uc010vgf.1	NETO2|81831	0.036	0	0	0	0
1223	uc002vxv.2	ILKAP|80895	0	0	0	-0.0358	0
1224	uc003xxf.2	COPS5|10987	0	0	0	0	-0.0356
1225	uc009xmh.1	HNRNPF|3185	0	0	0	0	-0.0354
1226	uc001pro.1	FXYD6|53826	0.0354	0	0	0	0
1227	uc001eiq.2	FCGR1B|2210	0.0354	0	0	0	0
1228	uc004ahh.2	APBA1|320	0	0	-0.0352	0	0
1229	uc011dqm.1	HLA-DMA|3108	0	0	0	0	-0.0351
1230	uc001szj.1	LIN7A|8825	0	0	0	0	0.0351
1231	uc002zqy.2	ARVCF|421	-0.0348	0	0	0	0
1232	uc003cex.2	CMTM8|152189	0	0	0	0.0347	0
1233	uc002ivq.2	EPX|8288	-0.0346	0	0	0	0
1234	uc003xbm.2	POLR3D|661	-0.0346	0	0	0	0
1235	uc002mok.2	PDE4A|5141	0.0343	0	0	0	0
1236	uc003jfx.2	BASP1|10409	0.0343	0	0	0	0
1237	uc002ecj.2	AHSP|51327	0	0.034	0	0	0
1238	uc010dxm.1	C19orf38|255809	0.0339	0	0	0	0
1239	uc010bri.2	LMF1|64788	0	0	0	-0.0338	0
1240	uc010sav.1	SLC37A2|219855	0.0336	0	0	0	0
1241	uc010erk.2	LILRA3|11026	0.0335	0	0	0	0
1242	uc010gpn.1	LOC284837|284837	0.0334	0	0	0	0
1243	uc001ymw.3	MARK3|4140	0	0	0	0	-0.0334
1244	uc003oxp.2	SUPT3H|8464	0	0	0.0333	0	0
1245	uc003vor.2	SMO|6608	0	0	0	0.0331	0
1246	uc010sja.1	LRMP|4033	0	0	0.0331	0	0
1247	uc003orp.2	CCND3|896	-0.0331	0	0	0	0
1248	uc004apc.2	DAPK1|1612	-0.0331	0	0	0	0
1249	uc011mcc.1	FIBCD1|84929	0	0	0	0.033	0
1250	uc011eeo.1	MTHFD1L|25902	0	0	0	0	-0.0329
1251	uc004ejv.3	BEX4|56271	-0.0329	0	0	0	0
1252	uc001ohn.1	RIN1|9610	0.0329	0	0	0	0
1253	uc010uru.1	LRRC28|123355	0	0.0329	0	0	0
1254	uc003vvm.2	JHDM1D|80853	0.0329	0	0	0	0
1255	uc001bgd.2	C1QB|713	0.0328	0	0	0	0
1256	uc004dpt.3	MAGED4B|81557	0	0	0.0327	0	0
1257	uc004dpy.2	MAGED4B|81557	0	0	0.0327	0	0
1258	uc002lqj.2	C19orf22|91300	0	0	0	0.0327	0
1259	uc001ldu.2	EIF3A|8661	0	0	0	0	-0.0326
1260	uc001clj.2	CCDC24|149473	0	0	0.0325	0	0
1261	uc003dvb.2	PCNP|57092	0	-0.0324	0	0	0
1262	uc001pxg.2	TMEM136|219902	0	0	0	0.0321	0
1263	uc001fmu.2	ARHGEF2|9181	0.0319	0	0	0	0
1264	uc001nns.2	DTX4|23220	0.0319	0	0	0	0
1265	uc003xrm.2	ATP6V1H|51606	0	0	0	0	-0.0319
1266	uc002sae.1	BCL11A|53335	-0.0318	0	0	0	0
1267	uc002mwe.2	NFIX|4784	0	0	0	0	0.0317
1268	uc010pkp.1	HSPA7|3311	0.0316	0	0	0	0
1269	uc010ino.2	ANXA5|308	0.0313	0	0	0	0
1270	uc003ock.1	HLA-DMB|3109	0	0	0	0	-0.0313
1271	uc001lho.2	CHST15|51363	0.0313	0	0	0	0
1272	uc002bgq.1	MEX3B|84206	-0.0312	0	0	0	0
1273	uc002fid.2	COTL1|23406	0.0311	0	0	0	0
1274	uc003law.3	TIFAB|497189	0.0311	0	0	0	0
1275	uc010pbm.1	MTMR11|10903	0.031	0	0	0	0
1276	uc003fid.2	TNFSF10|8743	0.0307	0	0	0	0
1277	uc002fzk.1	CHRNE|1145	0	-0.0306	0	0	0
1278	uc001fdy.1	TPM3|7170	0	0	0	0	-0.0306
1279	uc009zwh.2	SDSL|113675	0	0	0.0305	0	0
1280	uc001dna.2	GBP7|388646	0	0	0	0.0305	0
1281	uc002wyc.2	DNMT3B|1789	0	0	0.0304	0	0
1282	uc003zkh.2	KDM4C|23081	0	0	0	0	-0.0302
1283	uc002dmd.2	PRKCB|5579	0	0	0	0	-0.0302
1284	uc011dmc.1	HLA-A|3105	0	0	0	0.0302	0
1285	uc002ilf.3	CDC27|996	0	0.0299	0	0	0
1286	uc002lfj.3	POLI|11201	0	0	0	0.0298	0
1287	uc010peu.1	ADAM15|8751	0	-0.0297	0	0	0
1288	uc001inr.2	DCLRE1C|64421	0	0	0	0	0.0296
1289	uc001xph.2	COQ6|51004	0	0	0.0296	0	0
1290	uc003mmi.3	MGAT1|4245	0.0295	0	0	0	-0.0132
1291	uc010mrf.1	FAM120A|23196	0	0	0	0	-0.0295
1292	uc002yxf.2	ETS2|2114	0	0	0.0293	0	0
1293	uc003onw.3	MDGA1|266727	0	0	0.0292	0	0
1294	uc003sly.2	EIF3B|8662	0	0	0	0	-0.0291
1295	uc003yoq.2	NOV|4856	0	-0.0291	0	0	0
1296	uc002lpz.1	AZU1|566	0	-0.029	0	0	0
1297	uc001etk.1	SF3B4|10262	0.0289	0	0	0	0
1298	uc004fgu.2	ZNF185|7739	0	0	0	0	-0.0289
1299	uc003dig.2	ARHGEF3|50650	0	0	0	0	-0.0288
1300	uc001hut.2	C1orf124|83932	0	0.0288	0	0	0
1301	uc002jwn.2	CANT1|124583	0	0	0.0288	0	0
1302	uc003yrh.2	MTSS1|9788	0.0287	0	-0.0064	0	0
1303	uc001akc.2	PRDM16|63976	-0.0286	0	0	0	0
1304	uc001ndv.1	ARFGAP2|84364	0	0	0	0	-0.0285
1305	uc009ytf.2	FOLR2|2350	0.0285	0	0	0	0
1306	uc001oxe.2	WNT11|7481	0	0	0	0.0282	0
1307	uc003typ.1	MLXIPL|51085	0	0	0	0	0.0279
1308	uc001blt.1	CCDC21|64793	0	0	0	0	-0.0278
1309	uc003nen.2	GMNN|51053	0	0	0	0	-0.0278
1310	uc001kdi.1	FAM190B|54462	-0.0278	0	0	0	0
1311	uc003ibl.2	CAMK2D|817	0.0277	0	0	0	0
1312	uc010akd.1	PRMT5|10419	0	0	0	0	0.0277
1313	uc002sxh.3	SEMA4C|54910	0	-0.0275	0	0	0
1314	uc011dqq.1	HLA-DPB1|3115	0	0	0	0	-0.0275
1315	uc001kjr.2	TBC1D12|23232	0.0273	0	0	0	0
1316	uc002vqm.2	SP140|11262	0	0.0273	0	0	0
1317	uc001sgo.3	KIAA0748|9840	-0.0273	0	0	0	0
1318	uc001ibv.1	AHCTF1|25909	0	0	-0.0272	0	0
1319	uc001hjz.2	ANGEL2|90806	0	0	0	0	-0.0271
1320	uc002yty.2	uc002yty.2	0.0271	0	0	0	0
1321	uc003wju.2	SMARCD3|6604	0.027	0	0	0	0
1322	uc001vcj.2	RCBTB2|1102	0.027	0	0	0	0
1323	uc009vuu.2	ZMYM4|9202	0	0	0	0	-0.027
1324	uc003elh.1	KIAA1257|57501	0	0	0	0.027	0
1325	uc003txx.2	NSUN5|55695	0	0	0	0	-0.0269
1326	uc002ooc.2	SHKBP1|92799	0	0	0	0	0.0267
1327	uc002qfh.1	LILRA5|353514	0.0267	0	0	0	0
1328	uc010flo.1	GLI2|2736	0	0	0.0267	0	0
1329	uc010gco.2	C20orf72|92667	0	0	0	0	-0.0267
1330	uc003iio.1	RNF150|57484	0	0	0	0.0266	0
1331	uc010ixk.1	uc010ixk.1	0.0265	0	0	0	0
1332	uc001mah.1	HBG1|3047	0	0.0265	0	0	0
1333	uc001ijz.2	GATA3|2625	0	0	0	0.0265	0
1334	uc003uhf.3	CD36|948	0.0263	0	0	0	0
1335	uc004cjy.2	FBXW5|54461	0	0	0	0	-0.0262
1336	uc001ang.2	TNFRSF25|8718	0	0	0	0.026	0
1337	uc001fqk.1	PEAR1|375033	0	0	0	0.0257	0
1338	uc003nyf.2	C2|717	0.0257	0	0	0	0
1339	uc001asx.2	AGTRAP|57085	0	0	-0.0257	0	0
1340	uc001ofd.2	SIPA1|6494	0	0	0.0257	0	0
1341	uc002igr.1	GRN|2896	0.0256	0	0	0	0
1342	uc003srs.1	ICA1|3382	0	0	0	0.0256	0
1343	uc002fzq.2	RNF167|26001	0	0	0	0	-0.0256
1344	uc003gyu.2	OCIAD2|132299	-0.0254	0	0	0	0
1345	uc001bfh.1	LDLRAD2|401944	0	0	0.0253	0	0
1346	uc002kve.2	OSBPL1A|114876	0	-0.0252	0	0	0
1347	uc003wyl.2	ASAH1|427	0	0	0	0	-0.0252
1348	uc002cfl.3	RHBDF1|64285	0	-0.0251	0	0	0
1349	uc002qwy.1	TPO|7173	0	0	0	0.025	0
1350	uc003mnf.1	TRIM41|90933	0.0249	0	0	0	0
1351	uc001hjo.2	TATDN3|128387	0	0	0	0	-0.0246
1352	uc002mce.3	SAFB|6294	-0.0246	0	0	0	0
1353	uc003nhp.2	BTN3A2|11118	0	0	0	0.0246	0
1354	uc010pjw.1	F11R|50848	0	0	0.0246	0	0
1355	uc010rxx.1	AMICA1|120425	0.0244	0	0	0	0
1356	uc002inx.2	HOXB9|3219	0	0	0	0	0.0243
1357	uc003uai.2	LAT2|7462	0	0	0	0	-0.0243
1358	uc002xgg.1	C20orf118|140711	0.0243	0	0	0	0
1359	uc003gsq.1	ARAP2|116984	0	0	0	0	-0.0242
1360	uc001dcb.1	uc001dcb.1	-0.0242	0	0	0	0
1361	uc001rox.2	SFRS2IP|9169	0	0	0	0	-0.0241
1362	uc002mgs.2	PNPLA6|10908	0	0	0	0	-0.0241
1363	uc003lon.1	DPYSL3|1809	0	-0.024	0	0	0
1364	uc002ubb.3	LY75|4065	0	0	0	0	-0.024
1365	uc002iov.3	ZNF652|22834	0	0	0	0	-0.0239
1366	uc001vvr.1	uc001vvr.1	0	0	0	0	0.0237
1367	uc010gvg.2	MN1|4330	0	0	0	0.0236	0
1368	uc010lol.1	uc010lol.1	0	0	0.0236	0	0
1369	uc003eaz.2	QTRTD1|79691	0	0	0	0	-0.0235
1370	uc010cnq.1	uc010cnq.1	0	0	0	0.0234	0
1371	uc003xtc.1	uc003xtc.1	0.0234	0	0	0	0
1372	uc001fzc.1	APOA2|336	0.0234	0	0	0	0
1373	uc001scd.2	RARG|5916	0.0234	0	0	0	0
1374	uc010ocm.1	PADI2|11240	0.0234	0	0	0	0
1375	uc001cqy.2	TAL1|6886	0	0	0	0.0232	0
1376	uc010uer.1	SHF|90525	0	0	0	0.0232	0
1377	uc011cwm.1	SNCAIP|9627	0	0	0	0	0.023
1378	uc009ybd.1	STK32C|282974	0.0229	0	0	0	0
1379	uc010maq.2	FAM92A1|137392	0	-0.0229	0	0	0
1380	uc010jtv.1	AGER|177	0	0	0.0228	0	0
1381	uc002jks.2	GPRC5C|55890	0	0	0	0.0227	0
1382	uc003oon.2	KCNK5|8645	-0.0226	0	0	0	0
1383	uc003etr.2	SLC25A36|55186	0	0	0.0224	0	0
1384	uc003jvc.2	PIK3R1|5295	0	0	0.0222	0	0
1385	uc011kfa.1	RFC2|5982	0	0	0	0	-0.0222
1386	uc003pob.1	MAP3K7|6885	0	0	0	0	-0.0221
1387	uc003whj.2	GIMAP8|155038	0.0221	0	0	0	0
1388	uc002iik.1	uc002iik.1	0	0	0	0	-0.022
1389	uc010bnu.2	IDH2|3418	0	0	0	0	-0.0219
1390	uc001qnu.2	TNFRSF1A|7132	0	0	0	0	-0.0218
1391	uc003atu.2	TRIOBP|11078	0	-0.0217	0	0	0
1392	uc001vjp.1	COMMD6|170622	0	0	0	0	-0.0216
1393	uc002ywb.2	TTC3|7267	0	0.0216	0	0	0
1394	uc003lvd.2	FAM114A2|10827	0	0.0216	0	0	0
1395	uc002yxd.3	NCRNA00114|400866	0.0215	0	0	0	0
1396	uc003aem.2	EMID1|129080	-0.0215	0	0	0	0
1397	uc010inn.2	ANXA5|308	0.0215	0	0	0	0
1398	uc003ban.1	PPPDE2|27351	0	0	0	0	-0.0212
1399	uc001trs.1	HVCN1|84329	0.0211	0	0	0	0
1400	uc009xer.1	CABC1|56997	0	0	0	0	-0.0209
1401	uc010amk.2	C14orf128|84837	-0.0209	0	0	0	0
1402	uc002ehc.2	CHD9|80205	0	0	0.0209	0	0
1403	uc003zbi.3	HEATR7A|727957	0.0208	0	0	0	0
1404	uc009wyb.2	NPL|80896	0.0207	0	0	0	0
1405	uc001hzh.2	EXO1|9156	0	0.0207	0	0	0
1406	uc004fgv.2	ZNF185|7739	0	0	0	0	-0.0207
1407	uc002ull.2	AGPS|8540	0	0	0	0	-0.0205
1408	uc002vcs.2	IDH1|3417	0	0	0	0	-0.0205
1409	uc002ioo.1	GNGT2|2793	0.0205	0	0	0	0
1410	uc002pkv.1	HSD17B14|51171	0	0	0	0.0204	0
1411	uc010soj.1	PCBP2|5094	0	0	0	0	-0.0203
1412	uc002atz.1	PKM2|5315	0	0	0	0	-0.0201
1413	uc011eeb.1	SASH1|23328	0.0201	0	0	0	0
1414	uc002ino.2	HOXB3|3213	0	-0.0166	0.02	0	0
1415	uc002pqt.1	IL4I1|259307	0.02	0	0	0	0
1416	uc001oyd.2	MYO7A|4647	0.0198	0	0	0	0
1417	uc004cif.2	EGFL7|51162	0	0	0	0.0197	0
1418	uc010bzp.2	MAPK3|5595	0.0197	0	0	0	0
1419	uc001lmg.1	TUBGCP2|10844	0	0	0	0	-0.0196
1420	uc010edg.2	CCDC123|84902	-0.0196	0	0	0	0
1421	uc004ccg.2	GFI1B|8328	-0.0195	0	0	0	0
1422	uc004cvp.3	OFD1|8481	0	0	0	0	-0.0194
1423	uc003emn.2	IFT122|55764	0	0	0.0193	0	0
1424	uc001fgz.1	ADAM15|8751	0	0	0	0	-0.0193
1425	uc002zdu.1	LOC284837|284837	0.0192	0	0	0	0
1426	uc002qgf.2	LILRA2|11027	0.0192	0	0	0	0
1427	uc003dxi.1	TRAT1|50852	0	0.0191	0	0	0
1428	uc010llq.1	CCDC136|64753	0	0	0.019	0	0
1429	uc002mcf.2	SAFB|6294	0	0	0	0	-0.0189
1430	uc002mue.3	WDR83|84292	0	0	0.0108	0	-0.0189
1431	uc002kse.2	C18orf1|753	0	0.0189	0	0	0
1432	uc010mkq.2	RUSC2|9853	0	-0.0186	0	0	0
1433	uc002daj.3	CIITA|4261	0	0	0	0	-0.0186
1434	uc003ksx.1	SNCAIP|9627	0	0	0	0	0.0184
1435	uc003uuq.1	PILRA|29992	0.0183	0	0	0	0
1436	uc010psj.1	CD34|947	0	0	0	0.0182	0
1437	uc001wsy.1	KIAA0391|9692	0	0	0	0	-0.0181
1438	uc003zeo.3	COMMD5|28991	0.0055	0	0	0	-0.0181
1439	uc010ccj.1	MT1IP|644314	0.0179	0	0	0	0
1440	uc002tou.2	LIMS2|55679	-0.0178	0	0	0	0
1441	uc001wnb.1	TM9SF1|10548	0	0	0	0	-0.0178
1442	uc003itw.2	HPGD|3248	0	0	0	0.0175	0
1443	uc001vnb.2	MBNL2|10150	0	0	0	0.0175	0
1444	uc003apl.1	TXN2|25828	0	0	0	0	-0.0175
1445	uc003xjy.1	ZNF703|80139	0.0174	0	0	0	0
1446	uc002xmi.2	PKIG|11142	-0.0174	0	0	0	0
1447	uc003mjv.3	uc003mjv.3	0.0174	0	0	0	0
1448	uc002cky.2	TPSB2|64499	0	0	0	0.0173	0
1449	uc011avf.1	XPC|7508	0	0	0	0.0173	0
1450	uc001fdt.1	RAB13|5872	0	-0.0173	0	0	0
1451	uc010rwg.1	LAYN|143903	0	0	0	0.017	0
1452	uc002evv.1	SLC7A6|9057	0	0	0.0169	0	0
1453	uc003pxr.1	DCBLD1|285761	0.0169	0	0	0	0
1454	uc002tos.1	MYO7B|4648	0	0.0169	0	0	0
1455	uc011llo.1	ZNF252|286101	0	0	0	0	0.0169
1456	uc003ord.2	PRICKLE4|29964	0	-0.0168	0	0	0
1457	uc004egi.2	CSTF2|1478	0	0	-0.0167	0	0
1458	uc004eju.2	NXF3|56000	0	0	0	0	0.0167
1459	uc011naa.1	VAMP7|6845	0	0	0	0.0164	0
1460	uc010vsz.1	RPAIN|84268	0	0	0	0	-0.0164
1461	uc003ifa.2	SPRY1|10252	0	0	0	0.0161	0
1462	uc001asw.2	AGTRAP|57085	0	0	0	0	-0.016
1463	uc001ijl.2	uc001ijl.2	-0.0158	0	0	0	0
1464	uc002agi.3	BNIP2|663	0.0158	0	0	0	0
1465	uc004cvc.2	TLR7|51284	0.0158	0	0	0	0
1466	uc002oeb.3	ZNF566|84924	0	0.0157	0	0	0
1467	uc001isf.1	PRTFDC1|56952	0	0	0	0.0157	0
1468	uc009xyo.2	ABLIM1|3983	0	0	0	0.0156	0
1469	uc002kfb.3	C17orf62|79415	0	0	0	0	-0.0155
1470	uc001now.2	uc001now.2	0.0154	0	0	0	0
1471	uc001puu.2	HYOU1|10525	0	0	0.0154	0	0
1472	uc001gsl.2	RGS2|5997	0.0153	0	0	0	0
1473	uc003wpm.2	DLGAP2|9228	0	0	0	0.0153	0
1474	uc001aix.1	C1orf86|199990	0	0	0	0	-0.0151
1475	uc003oqq.3	MDFI|4188	-0.0151	0	0	0	0
1476	uc003oct.1	HLA-DPA1|3113	0	0	0	0	-0.015
1477	uc001qxa.2	CLEC9A|283420	0	0	0	0.015	0
1478	uc004aka.2	PCSK5|5125	0.0149	0	0	0	0
1479	uc001aqq.2	RBP7|116362	0.0148	0	0	0	0
1480	uc010chs.2	MAP1LC3B|81631	0.0148	0	0	0	0
1481	uc001eei.2	DCLRE1B|64858	0	0	0	0.0148	0
1482	uc002nqe.2	uc002nqe.2	-0.0147	0	0	0	0
1483	uc001utf.1	ALOX5AP|241	0	0	0	-0.0147	0
1484	uc001ibl.2	SMYD3|64754	-0.0145	0	0	0	0
1485	uc002uzv.3	CYP20A1|57404	0	0.0145	0	0	0
1486	uc002hxs.2	JUP|3728	-0.0145	0	0	0	0
1487	uc010uaq.1	uc010uaq.1	0	0	0	0	-0.0144
1488	uc003kjl.2	MEF2C|4208	0	0	0.0141	0	0
1489	uc003uag.2	LAT2|7462	0	0	0	0	-0.014
1490	uc003eoa.2	NEK11|79858	0	0	0.0139	0	0
1491	uc002xzm.2	STX16|8675	0	0	0	0	-0.0138
1492	uc003onv.1	MDGA1|266727	-0.0138	0	0	0	0
1493	uc003bme.3	TYMP|1890	0.0137	0	0	0	0
1494	uc003pdv.1	PRIM2|5558	0	0.0137	0	0	0
1495	uc002igq.1	GRN|2896	0.0137	0	0	0	0
1496	uc010snv.1	EIF4B|1975	0	0	0	0	0.0136
1497	uc011agi.1	CECR1|51816	0.0136	0	0	0	0
1498	uc002bfe.1	ZFAND6|54469	0	0	0	0	-0.0136
1499	uc004cmv.2	NOXA1|10811	0	-0.0136	0	0	0
1500	uc002zti.1	uc002zti.1	0	-0.0134	0	0	0
1501	uc004cgv.3	uc004cgv.3	0.0134	0	0	0	0
1502	uc010veu.1	ITGAL|3683	0	0	0	0	-0.0133
1503	uc010sar.1	ROBO3|64221	0	0	0	0	-0.0132
1504	uc010rxl.1	IL10RA|3587	0.0132	0	0	0	0
1505	uc001jct.2	FAM21C|253725	0	0	0	0	0.0131
1506	uc010red.1	WIT1|51352	-0.0131	0	0	0	0
1507	uc001fth.2	IFI16|3428	0	0	0	0	-0.0131
1508	uc003aqn.2	MPST|4357	0	0	0	0	-0.0131
1509	uc001lzk.2	OR51E2|81285	0.013	0	0	0	0
1510	uc001pyj.2	CRTAM|56253	0	0.013	0	0	0
1511	uc011ebq.1	PKIB|5570	0.0129	0	0	0	0
1512	uc010jop.2	GCNT2|2651	0	0	0	0.0128	0
1513	uc003ouc.1	PTK7|5754	0	0	0.0128	0	0
1514	uc001eoi.2	POLR3C|10623	0	0	0	0	-0.0127
1515	uc002sbo.2	CCT4|10575	0	0	0	0	-0.0125
1516	uc001dgy.1	RABGGTB|5876	0	0	0	0	-0.0124
1517	uc009xzc.2	CASC2|255082	0	0	0	0	0.0124
1518	uc003svf.3	CDCA7L|55536	-0.0123	0	0	0	0
1519	uc002omh.2	CLC|1178	0	0	0	0	0.0122
1520	uc001xgf.1	PPP2R5E|5529	0.0122	0	0	0	0
1521	uc001eez.2	DENND2C|163259	0	0	0	0	-0.0122
1522	uc001iaa.2	AKT3|10000	0	0	0	0	-0.0122
1523	uc011cek.1	DAPP1|27071	0.0122	0	0	0	0
1524	uc002reo.1	MFSD2B|388931	-0.012	0	0	0	0
1525	uc011aiy.1	BCR|613	-0.0118	0	0	0	0
1526	uc011agj.1	CECR1|51816	0.0118	0	0	0	0
1527	uc002hzj.1	STAT5A|6776	0	0	0	0.0117	0
1528	uc002zvd.2	YDJC|150223	-0.0117	0	0	0	0
1529	uc001zcl.2	APBA2|321	0	0	-0.0115	0	0
1530	uc002iux.2	AKAP1|8165	0	0	0	0	-0.0115
1531	uc003ktf.2	SNX24|28966	0.0115	0	0	0	0
1532	uc011dqa.1	HLA-DRB1|3123	0	0	0	0	-0.0115
1533	uc003fcu.1	SCHIP1|29970	-0.0115	0	0	0	0
1534	uc001tot.2	UBE3B|89910	0	0	0	0	0.0113
1535	uc004fud.3	CYorf15A|246126	0	0	0	0.0112	0
1536	uc001lwt.3	CDKN1C|1028	-0.0111	0	0	0	0
1537	uc010flp.2	GLI2|2736	0	0	0.0109	0	0
1538	uc010nmp.2	APOOL|139322	0	0	0	0	0.0109
1539	uc001lle.1	STK32C|282974	0	-0.0108	0	0	0
1540	uc003xxr.3	CPA6|57094	0	0	0.0107	0	0
1541	uc010mdz.1	SLA|6503	0.0106	0	0	0	0
1542	uc003xsk.3	LYN|4067	0	0	0	0	-0.0106
1543	uc010kba.2	CD109|135228	0	-0.0106	0	0	0
1544	uc009wdv.2	RWDD3|25950	0.0106	0	0	0	0
1545	uc011brw.1	SENP2|59343	0	0	0	0	-0.0106
1546	uc001ssm.2	MSRB3|253827	0	0	0.0105	0	0
1547	uc010pli.1	RCSD1|92241	0	0	-0.0104	0	0
1548	uc003lbh.3	TGFBI|7045	0.0104	0	0	0	0
1549	uc003hmh.2	PRKG2|5593	0	0	0	0.0104	0
1550	uc001pnr.2	NCAM1|4684	0	0	-0.0104	0	0
1551	uc002okm.1	PAK4|10298	0	0	0.0103	0	0
1552	uc011alb.1	OSBP2|23762	0	0	0	0.0103	0
1553	uc010yat.1	ALDH16A1|126133	0	0	0	0	0.0102
1554	uc004flq.2	SLC10A3|8273	-0.0102	0	0	0	0
1555	uc002wfg.2	SIRPB2|284759	0.01	0	0	0	0
1556	uc010xmx.1	NFIX|4784	-0.01	0	0	0	0
1557	uc002zra.2	ARVCF|421	-0.0099	0	0	0	0
1558	uc003tgv.2	AMPH|273	0.0098	0	0	0	0
1559	uc003yjv.2	YWHAZ|7534	0	0	0	0	-0.0095
1560	uc003bst.2	CAMK1|8536	0.0095	0	0	0	0
1561	uc010zde.1	DHRS9|10170	0.0095	0	0	0	0
1562	uc001fyz.1	FCER1G|2207	0.0094	0	0	0	0
1563	uc003yee.2	RIPK2|8767	0	0	0	0	-0.0094
1564	uc001qsy.2	CD163L1|283316	0.0094	0	0	0	0
1565	uc003ocl.1	HLA-DMB|3109	0	0	0	0	-0.0094
1566	uc003ahw.1	MTP18|51537	0	0	0	0	-0.0094
1567	uc010voh.1	CRISPLD2|83716	0.0093	0	0	0	0
1568	uc004esx.2	MCTS1|28985	0	0	0	0	-0.0092
1569	uc003slq.1	NUDT1|4521	0	0	0.0092	0	0
1570	uc003fag.1	uc003fag.1	0	0	0	0	0.0092
1571	uc003mga.3	MXD3|83463	0.0091	0	0	0	0
1572	uc010vjp.1	FAM65A|79567	0.0091	0	0	0	0
1573	uc001dkm.2	MCOLN2|255231	0.009	0	0	0	0
1574	uc003xha.2	INTS9|55756	0	0	0	0.009	0
1575	uc003ypa.2	MRPL13|28998	0	0	0	0	-0.0089
1576	uc003mlx.2	CNOT6|57472	0	0	0	0	-0.0089
1577	uc009zwb.2	TRAFD1|10906	0	0	0	0	-0.0089
1578	uc001rzo.1	GRASP|160622	0	0	-0.0089	0	0
1579	uc010ppw.1	PTPN7|5778	0	0	0.0088	0	0
1580	uc004cxm.2	CTPS2|56474	-0.0087	0	0	0	0
1581	uc002tkl.3	RABL2A|11159	0	0	0.0086	0	0
1582	uc002vhu.1	SLC11A1|6556	0.0086	0	0	0	0
1583	uc011ckh.1	HPGD|3248	0	0	0	0.0085	0
1584	uc001ade.2	TNFRSF4|7293	-0.0084	0	0	0	0
1585	uc001imb.2	MCM10|55388	0	0	0	0	-0.0084
1586	uc003smg.2	LFNG|3955	0.0083	0	0	0	0
1587	uc010cbp.1	NOD2|64127	0.0082	0	0	0	0
1588	uc001ouk.1	PAAF1|80227	-0.0082	0	0	0	0
1589	uc001gao.2	FCGR2A|2212	0.0082	0	0	0	0
1590	uc002uid.1	CDCA7|83879	0	0	0	0	-0.008
1591	uc003vqg.2	MEST|4232	0	0.008	0	0	0
1592	uc002rpa.1	FAM98A|25940	0	0	0	0	-0.0079
1593	uc003fnf.1	ALG3|10195	0	0	0	0	-0.0079
1594	uc001svv.2	CNOT2|4848	0	0	0	0	-0.0079
1595	uc002cwv.2	C16orf5|29965	0	0	0.0077	0	0
1596	uc001mkv.1	ARNTL|406	0	0	0	0	-0.0076
1597	uc010yob.1	LRPPRC|10128	0	0	0	0	-0.0075
1598	uc010bvm.2	ABCC1|4363	-0.0073	0	0	0	0
1599	uc002gla.3	SLC25A35|399512	0	-0.0072	0	0	0
1600	uc003jhu.2	NPR3|4883	-0.0072	0	0	0	0
1601	uc001brp.1	MECR|51102	-0.0072	0	0	0	0
1602	uc003laq.1	H2AFY|9555	0	0	0	0	-0.0071
1603	uc004eqs.2	IL13RA1|3597	0.007	0	0	0	0
1604	uc001ncj.1	DGKZ|8525	0.007	0	0	0	0
1605	uc001ush.2	SLC46A3|283537	0	0	0	0	-0.0069
1606	uc001xyp.2	TTC7B|145567	-0.0069	0	0	0	0
1607	uc003yvu.2	PTK2|5747	0.0069	0	0	0	0
1608	uc001gjf.3	CENPL|91687	-0.0067	0	0	0	0
1609	uc002neh.1	C19orf44|84167	0	0	0.0067	0	0
1610	uc010wky.1	MRPL10|124995	0	0	0.0067	0	0
1611	uc010ubk.1	MTMR10|54893	0	0	0	0	0.0063
1612	uc010vhs.1	GPR56|9289	0	0	0.0063	0	0
1613	uc001tsy.2	C12orf47|51275	0	0	0	0	-0.0062
1614	uc002jyl.1	FLJ35220|284131	-0.0062	0	0	0	0
1615	uc003xbz.2	PDLIM2|64236	0	0	0	0	-0.0062
1616	uc003ezp.2	MBNL1|4154	0	0	0	0.0061	0
1617	uc003xsz.2	PENK|5179	0.0061	0	0	0	0
1618	uc001szi.3	uc001szi.3	0	0	0	0	0.0061
1619	uc002lgd.1	uc002lgd.1	0	0	0.006	0	0
1620	uc003prj.2	RTN4IP1|84816	0	0	0	0	-0.0059
1621	uc003noo.2	HLA-A|3105	0	0	0	-0.0059	0
1622	uc003yhf.2	C8orf38|137682	0	0	0.0059	0	0
1623	uc009zmv.2	ITGB7|3695	0.0059	0	0	0	0
1624	uc011cyb.1	TGFBI|7045	0.0059	0	0	0	0
1625	uc010pnh.1	ABL2|27	0	0	0.0058	0	0
1626	uc010qjb.1	CCAR1|55749	-0.0058	0	0	0	0
1627	uc002lfr.2	RAB27B|5874	0	0	0.0057	0	0
1628	uc002vnw.2	FAM124B|79843	0	0	0	0.0057	0
1629	uc003kzk.2	PHF15|23338	-0.0056	0	0	0	0
1630	uc001mut.3	CD59|966	0	0	0.0055	0	0
1631	uc003twa.3	CALN1|83698	0	0	0	0.0053	0
1632	uc003cwe.2	LAMB2|3913	0	0	0	0	0.0049
1633	uc004euf.3	SH2D1A|4068	0	0	0.0049	0	0
1634	uc002iwn.1	SEPT4|5414	0.0048	0	0	0	0
1635	uc001hde.3	RAB7L1|8934	0	0	0	0	-0.0047
1636	uc010rls.1	BEST1|7439	0.0047	0	0	0	0
1637	uc002cvm.1	CLUAP1|23059	-0.0046	0	0	0	0
1638	uc002pdb.2	SIX5|147912	0	0	0	0.0046	0
1639	uc001moe.1	HPS5|11234	0	0	0	0	-0.0045
1640	uc003obs.2	HLA-DQA1|3117	0.0045	0	0	0	0
1641	uc009wpc.1	ADAM15|8751	0	0	0	0	-0.0044
1642	uc010vht.1	GPR56|9289	0	0	0.0044	0	0
1643	uc002pjc.3	GRIN2D|2906	0.0043	0	0	0	0
1644	uc010gjy.1	LSM14B|149986	0	0	0	0	-0.0043
1645	uc003ajn.1	SMTN|6525	0.0043	0	0	0	0
1646	uc010rqa.1	SUV420H1|51111	0	0	0	0	0.0042
1647	uc002wah.1	SNED1|25992	0	0	0	0.0042	0
1648	uc002grs.1	SREBF1|6720	0	0.0041	0	0	0
1649	uc011kxf.1	FDFT1|2222	0	0.0039	0	0	0
1650	uc004ebm.1	XIST|7503	0	0	0	-0.0039	0
1651	uc011egd.1	AGPAT4|56895	0	0	0.0039	0	0
1652	uc003jwi.2	RAD17|5884	0	0	0	0.0038	0
1653	uc001ymg.3	AMN|81693	-0.0038	0	0	0	0
1654	uc010oii.1	C1orf122|127687	0	0	0	0	-0.0037
1655	uc009ynm.1	DAK|26007	0	0	0	0	-0.0036
1656	uc001qhi.2	THYN1|29087	0	0	0	0	-0.0036
1657	uc003uhe.3	CD36|948	0.0036	0	0	0	0
1658	uc002mur.2	TNPO2|30000	-0.0034	0	0	0	0
1659	uc002gcu.1	FAM64A|54478	0	0	0	0.0032	0
1660	uc002vra.2	ITM2C|81618	-0.003	0	0	0	0
1661	uc001afs.2	VWA1|64856	0	0	0.0028	0	0
1662	uc003zuo.2	ENHO|375704	0.0028	0	0	0	0
1663	uc001isv.2	PDSS1|23590	0	0	0	0	-0.0028
1664	uc002oea.3	ZNF566|84924	0	0	0.0028	0	0
1665	uc010reb.1	RCN1|5954	-0.0028	0	0	0	0
1666	uc003zsx.2	AQP3|360	-0.0026	0	0	0	0
1667	uc002ivu.1	MPO|4353	-0.0026	0	0	0	0
1668	uc001ids.2	OR2L13|284521	0	0	0.0025	0	0
1669	uc001rsp.2	FKBP11|51303	-0.0025	0	0	0	0
1670	uc002igx.1	FZD2|2535	0.0025	0	0	0	0
1671	uc001oge.2	FIBP|9158	0	0	0	0	-0.0025
1672	uc001ito.2	ACBD5|91452	0.0025	0	0	0	0
1673	uc004bcl.2	ABCA1|19	0.0024	0	0	0	0
1674	uc002qna.1	uc002qna.1	-0.0024	0	0	0	0
1675	uc001asv.2	AGTRAP|57085	0.0023	0	0	0	0
1676	uc001wwx.2	KLHDC2|23588	0	0	0.0023	0	0
1677	uc001yrz.1	uc001yrz.1	0	0	-0.0022	0	0
1678	uc003qqn.2	ARID1B|57492	0	0	0.0021	0	0
1679	uc011ecv.1	SGK1|6446	0.0019	0	0	0	0
1680	uc001mee.2	ILK|3611	0	0	0	0	-0.0018
1681	uc001gan.2	FCGR2A|2212	0.0017	0	0	0	0
1682	uc001kcc.3	C10orf58|84293	0	0	0	0.0017	0
1683	uc002uic.1	CDCA7|83879	0	0	0	0	-0.0017
1684	uc001rby.3	ATF7IP|55729	0	0	0	0	-0.0016
1685	uc010fyh.1	DGKD|8527	0	0	0	0	-0.0016
1686	uc002roj.1	NLRC4|58484	0.0015	0	0	0	0
1687	uc001xpy.2	NPC2|10577	0	0	0	0	-0.0015
1688	uc002ywx.2	KCNJ15|3772	0.0015	0	0	0	0
1689	uc004brh.2	FAM129B|64855	0.0014	0	0	0	0
1690	uc003weh.1	OR2A9P|441295	0	0	0.0014	0	0
1691	uc003uyt.2	CUX1|1523	0	0	0	0	-0.0013
1692	uc002lpm.1	PALM|5064	-0.0013	0	0	0	0
1693	uc002qzt.2	IAH1|285148	0	0.0012	0	0	0
1694	uc001jsm.2	PSAP|5660	0.0011	0	0	0	0
1695	uc003esi.3	MRAS|22808	0.001	0	0	0	0
1696	uc010thn.1	DACH1|1602	0	-0.001	0	0	0
1697	uc003jfm.3	ANKH|56172	0	0	-0.0009	0	0
1698	uc003lsa.2	TCOF1|6949	-0.0007	0	0	0	0
1699	uc001xjw.3	RDH11|51109	0	0	-0.0007	0	0
1700	uc002myt.2	GIPC1|10755	0	0	0	0.0007	0
1701	uc003tfh.3	AOAH|313	0.0007	0	0	0	0
1702	uc002haz.2	POLDIP2|26073	0	0	0	0	-0.0006
1703	uc003ypl.2	DERL1|79139	0	0	0	0	-0.0005
1704	uc003ouw.2	ZNF318|24149	0.0005	0	0	0	0
1705	uc001dow.3	GFI1|2672	0	0	0.0004	0	0
1706	uc002zal.1	UMODL1|89766	-0.0003	0	0	0	0
1707	uc009xxa.2	PPRC1|23082	0	0	0	0	0.0002
1708	uc002ibn.2	BECN1|8678	0	0	0	0	-0.0001
1709	uc010fnm.2	KYNU|8942	0.0001	0	0	0	0
1710	uc003eul.3	TFDP2|7029	0	0	0	0	0
